# Supplementary material for: Comparative Proteomic Analysis Reveals New Insights Into the Common and Specific Metabolic Regulation of the Diatom Skeletonema dohrnii to the Silicate and Temperature Availability
Source: Front Plant Sci. 2020 Nov 5;11:578915. doi: 10.3389/fpls.2020.578915 (PMC7674209; doi:10.3389/fpls.2020.578915)
Supplement: Supplementary Table 1 — Annotation details of overall identified proteins. [file Table_1.XLSX]

## Sheet: Table S1
Title :	Comparative proteomic analysis reveals new insights into the common and specific metabolic regulation of diatom Skeletonema dohrnii to the silicate and temperature availability
Authors :	Satheeswaran Thangaraj, Mario Giordano and Jun Sun*
Table S1	Annotated details of overall identified proteins in this study
No	Protein_ID	Group_ID	Protein_Mass	PeptideSeqs	PepIsUniqe	Unique_Peptide_Num	Unique_Spectra_Num	Peptide_Query	Sameset	Description	ratio_113/115	n.spectra_113/115	pvalue_113/115	qvalue_113/115	ratio_113/116	n.spectra_113/116	pvalue_113/116	qvalue_113/116	ratio_114/115	n.spectra_114/115	pvalue_114/115	qvalue_114/115	ratio_114/116	n.spectra_114/116	pvalue_114/116	qvalue_114/116	ratio_113/117	n.spectra_113/117	pvalue_113/117	qvalue_113/117	ratio_113/118	n.spectra_113/118	pvalue_113/118	qvalue_113/118	ratio_114/117	n.spectra_114/117	pvalue_114/117	qvalue_114/117	ratio_114/118	n.spectra_114/118	pvalue_114/118	qvalue_114/118	ratio_114/113	n.spectra_114/113	pvalue_114/113	qvalue_114/113	ratio_116/115	n.spectra_116/115	pvalue_116/115
1	EED88699.1	1039	42701	DQIYDIFK;TLQGGVHVVVGTPGR;QFYIAVER;VLITTDLLAR;ELAQQIQK;ECQSLILAPTR;GVAINFLTEGDVR;TATFAIGTLAK;VDWLQEQMQER;DLIAQAQSGTGK;KDELTLEGIK;KGVAINFLTEGDVR;KVDWLQEQMQER;GFKDQIYDIFK;GIDVQQVSLVINFDLPTNR;GIYAYGFEKPSAIQQR;FLPESVQVCLFSATMPLDVLEVTQR	1;1;1;1;1;1;1;1;1;1;1;1;1;1;1;1;1	17	80	7112;200585;200588;200589;200590;200591;200598;200599;200600;65169;232730;103927;103929;103937;196512;130676;130677;130678;130680;177042;177054;177055;177058;177059;177064;177066;185121;185132;185133;185143;185151;185162;185168;185169;185179;211930;211931;211932;211933;213814;213819;228958;228960;228961;228963;236379;236382;236383;236394;288122;288123;288125;288126;288127;299309;299310;299311;299…	XP_002293690.1	eukaryotic translation initiation factor 4A [Thalassiosira pseudonana CCMP1335]	1.13046	77	0.0001	0.00219734	1.11764	80	0.0001	0.00353298	1.14058	79	0.00059994	0.00806337	1.14448	79	0.0001	0.00261133	0.840549	78	0.0001	0.0035271	0.657455	80	0.0001	0.00239976	0.853033	78	0.0001	0.0036731	0.690375	80	0.0001	0.00260844	1.0154	78	0.451355	0.819535	0.988963	77	0.674333
2	EED91276.1	1123	92720.8	TVIMMGR;FSVSPVVR;VSDPVVSFR;GMGQIMPTAR;GVNYLLEIK;LWGDWYFDAGR;TTLTDSLVQK;SMSVIAHVDHGK;DGIPEISQYLDK;DGIPEISQYLDKL;VDTLYNGPLDDATATAIR;ALLELQLPAEELYQAFCR;IWAFGPEGTGPNLFVDTTK;VTDGALVVVDTIDGVCVQTETVLR;KIWAFGPEGTGPNLFVDTTK;YTEQVADVPAGNTCALVGVDQYLLK	1;1;1;1;1;1;1;1;1;1;1;1;1;1;1;1	16	76	47826;66820;66821;66822;66825;98038;98046;98047;98051;114231;114232;114237;114238;114240;114241;114242;119133;202459;202482;202488;202491;202492;202496;202497;270804;270805;210552;210553;210556;276881;216698;216702;216703;216704;216706;256408;256425;259689;259693;259695;275406;275409;275410;275411;275413;275414;275417;294661;294666;294670;294671;294672;294673;294675;294676;294677;294678;294679;29…	XP_002291169.1	translation factor tu domain 2 [Thalassiosira pseudonana CCMP1335]	1.28423	75	0.0001	0.00219734	1.08262	74	0.0049995	0.0581232	1.1379	70	0.0177982	0.102085	0.9871	68	0.722128	0.905414	0.699893	76	0.0001	0.0035271	0.703714	74	0.0001	0.00239976	0.635271	76	0.0001	0.0036731	0.627903	75	0.0001	0.00260844	0.935667	71	0.0139986	0.150883	1.15924	76	0.0001
3	EED91201.1	1681	139061	AVLFEVQSR;VGVQTFR;EYITAIR;ATGGSSGVDVPIASLR;SAMGTAFK;LLQPPTPIVR;TLDNPIYATR;VLGELTAPK;GFPEVALHFVR;AIVAYLQSK;YCLPTGDTGTIR;QGNHQVVEMSYQR;GVNWAAFHPTLPLLASAADDR;TVQFHPNATQFPWILSASDDQTLR	1;1;1;1;1;1;1;1;1;1;1;1;1;1	14	25	14615;110595;47663;60818;66628;234998;234999;131159;136532;145882;145885;145907;167499;180367;180368;180392;180428;188055;202566;202567;202569;254720;340747;362990;362994	XP_002291094.1	coatomer protein subunit alpha [Thalassiosira pseudonana CCMP1335]	0.719455	25	0.0001	0.00219734	0.895515	25	0.00169983	0.0288971	0.730784	25	0.00029997	0.00478094	0.904155	25	0.0565943	0.259499	1.00173	25	0.975102	0.994138	0.885161	25	0.0793921	0.329276	1.07075	24	0.0882912	0.405419	0.96087	24	0.489451	0.833502	1.04832	22	0.0879912	0.414097	0.84513	25	0.00059994
4	YP_004072575.1	507	56392.6	RMPAFFETFPVILVDK;VHTVVLNDPGR;QGMFVMPFMTR;GDGIAEAWLGHPIFR;KAQLGEVFEFDR;LAFYDYIGNNPAK;MPAFFETFPVILVDK;YSIEQVGVTVDFYGGK;YQWDSGYFQQEIER;SGPMDKGDGIAEAWLGHPIFR;MPAFFETFPVILVDKDGIIR;RMPAFFETFPVILVDKDGIIR	1;1;1;1;1;1;1;1;1;1;1;1	12	75	86132;340188;341382;341385;341387;341388;341389;341393;341397;341398;159636;204342;208331;208332;208333;208334;208335;208336;212292;212293;212295;212296;267227;267228;267229;267230;267231;267232;267234;267242;267243;267244;267245;267249;267253;267257;267261;286255;286256;286257;286258;286259;286260;286261;286262;286263;286264;286269;293732;293755;293756;293757;330896;327512;329049;329060;328220;3…	XP_002297545.1;ABK20730.1;YP_874507.1;ADB27529.1;EED86185.1	photosystem II CP47 chlorophyll apoprotein (chloroplast) [Thalassiosira oceanica CCMP1005]	0.52897	75	0.0001	0.00219734	0.737208	74	0.0001	0.00353298	0.417813	74	0.0001	0.00211861	0.604235	74	0.0001	0.00261133	1.26713	73	0.0001	0.0035271	1.3672	75	0.0001	0.00239976	1.0851	73	0.0039996	0.0493101	1.17384	70	0.0001	0.00260844	0.835117	71	0.0001	0.0049995	0.74553	68	0.0001
5	EED93536.1	1322	56066.7	TLDQYYAR;SGQVLEVSGSR;FVSQGPYQAR;DLHVLVILTDMSSYADALR;KTLDQYYAR;GIFPPINVLPSLSR;LALTTAEYLAYER;YAEIVNLTLGDGTTR;TALFLNLANDPTIER;GYPGYMYTDLSTIYER;IPIFSAAGLPHNEVAAQIAR;AVVGEEALSMEDHLYLSFLER	1;1;1;1;1;1;1;1;1;1;1;1	12	79	105106;105107;197519;131739;131778;142353;142356;142367;196825;334120;335425;335426;229107;229110;240468;240480;240482;240483;240484;240485;240486;240487;240488;240491;240492;240499;240502;240503;240504;240506;240508;240510;240511;241303;241304;241305;241309;241310;241313;241314;241315;241320;298457;298458;264083;276513;276515;276516;276517;276519;276520;276521;276522;276523;276524;276526;313199;…	XP_002289999.1	vacuolar ATPase [Thalassiosira pseudonana CCMP1335]	1.31333	77	0.0001	0.00219734	1.31274	79	0.0001	0.00353298	1.20426	78	0.0001	0.00211861	1.23685	77	0.0001	0.00261133	1.47397	79	0.0001	0.0035271	1.35706	79	0.0001	0.00239976	1.40037	78	0.0001	0.0036731	1.3307	79	0.0001	0.00260844	0.958265	79	0.0454954	0.298875	0.989287	76	0.674533
6	EED94913.1	147	246651	AISFVVMATPEDLR;TAQAINDFR;LYIAANSGAR;SQVAYQTSK;LGGIPMGVIATENR;LQVEHPVTEMITR;GSFTETLAGWAK;TEDLPLIIFANWR;GDISTTVDYISK;QVVLIANDITHK	1;1;1;1;1;1;1;1;1;1	10	22	77078;249072;249074;252433;106876;106908;192826;192828;192829;221012;221025;221027;224867;249892;249893;253955;253956;253962;257123;260159;260160;270350	XP_002287470.1	predicted protein, partial [Thalassiosira pseudonana CCMP1335]	0.856188	21	0.00569943	0.0440789	1.01151	21	0.763924	0.913546	0.821742	21	0.0219978	0.120055	0.934894	19	0.221978	0.581401	1.02002	22	0.725127	0.931304	1.12663	20	0.00329967	0.036663	1.00224	22	0.971903	0.993867	1.07464	22	0.276272	0.658748	0.978615	22	0.664434	0.911227	0.873589	22	0.0107989
7	ANG60900.1	722	42102.1	SVFPSLIGR;SFELPDGNIIVIGNER;GYSLTTTAER;QPGIMVGMEQR;DLTDYLMK;IWHHTFYNELR;KAAESSALEK;VAPEAHPVLLTEAPQNPK;ESLCFVAVDFEEEMKK;TTGCVLDSGDGVTHTVPIYEGYALPHAVVR	1;1;1;1;1;1;1;1;1;1	10	57	89483;89484;89485;89489;89491;120302;290965;290973;290975;290983;290987;290989;290993;290994;291022;125265;125274;125280;125284;125287;214843;214844;214845;214849;214852;171679;171683;171684;176837;176839;176844;176845;176847;176848;176855;181982;189470;189472;189477;189479;193494;193498;241687;241690;267881;267882;267883;340274;340275;340276;340277;357894;367727;367728;367729;369306;369307	EJK63020.1	actin [Skeletonema marinoi]	1.11652	53	0.0009999	0.0124263	1.30473	55	0.0001	0.00353298	1.28998	57	0.0001	0.00211861	1.57447	57	0.0001	0.00261133	1.17011	57	0.00109989	0.0178261	1.08476	57	0.138386	0.468224	1.42895	54	0.0001	0.0036731	1.37731	54	0.0001	0.00260844	1.24662	57	0.0001	0.0049995	0.89175	53	0.00209979
8	EED89326.1	438	168118	YIGATLDR;GQLTPEQVSQYYLDIK;VFPHDYK;IQGTDFEALYR;NAQPTGEVSVK;LVSEVGVGVVAAGVAK;GAQVFEAVGLADEIVYR;DDHVVLSSEIGVIPELK;GGVGCCPASGDGAGMLFGMPDAFMR	1;1;1;1;1;1;1;1;1	9	20	71291;71307;79929;338244;160548;160555;160561;160583;192067;222457;222458;222459;222462;288850;288851;301476;334949;335958;356086;356087	XP_002293590.1	predicted protein [Thalassiosira pseudonana CCMP1335]	1.19978	20	0.00509949	0.0412075	1.17254	16	0.00079992	0.0161961	1.02334	20	0.663334	0.879856	0.999769	20	0.9975	0.9995	0.962052	20	0.440356	0.78215	0.882431	20	0.0787921	0.329062	0.880978	19	0.0104989	0.102152	0.836011	18	0.00189981	0.0271401	0.894901	20	0.0252975	0.21892	1.04663	20	0.451655
9	ABO61433.1	107	42254	DVNAAVATIK;FDGALNVDVTEFQTNLVPYPR;QLYHPEQIISGK;NLDIERPTYTNLNR;AVCMVANTTAIAEALSR;TIQFVDWCPTGFK;CGINYQPPTVVPGGDLAR;IDHKFDLMYAK;TVGGGDDAFNTFFSETGAGK	1;1;1;1;1;1;1;1;1	9	30	190410;190412;190414;237049;350769;350772;281968;282236;282239;282240;282243;282245;282246;282247;323952;291729;291734;291735;294379;294396;294397;294399;310030;310031;310039;310040;311360;322099;344698;344702	ABO61434.1;ABO61430.1;EED90212.1;XP_002292237.1	alpha tubulin, partial [Thalassiosira sp. CCMP1987]	0.715518	28	0.0001	0.00219734	1.09689	28	0.0193981	0.142675	0.612714	29	0.0001	0.00211861	0.992665	29	0.893011	0.970516	1.24167	30	0.0019998	0.0270499	0.919519	25	0.159784	0.502568	1.16056	24	0.0001	0.0036731	0.831216	28	0.00069993	0.0134029	0.941625	30	0.173183	0.564726	0.686316	29	0.0001
10	XP_002292183.1	998	31154.9	DDGLAAGIASVATR;TDGRPLNAR;VYVEDGALR;SETIQGGALR;TFNAVIGTPR;IELLQGPNNNK;VGGGMDWPDDGLMIGR;NIGQLEFPLDAVVRPDR;QVVELYTEDGLDRPFFAIVETPGSGNVVR;TYPFNPTVDSVAIILK;VVNTAPVEFPLYASVDAYR;DLAEIWDNSSPVIVQGGSLR;TWSFANPAIESVQVLLK;NIGQLEFPLDAVVRPDRDDGLAAGIASVATR	1;0;1;0;0;0;1;0;1;1;1;1;1;1	9	91	41867;192991;192999;193004;193005;193006;193013;193017;96453;102740;195480;195487;195500;195502;195508;195510;105743;118632;118635;118636;118641;248049;248051;248053;248055;248056;248057;248061;274200;274201;274203;274207;314569;314570;314572;314573;314576;314577;314580;314582;325495;367891;367892;367893;367894;367896;367897;367898;367899;367900;369371;369372;369373;329778;329781;329787;329788;32…	EED90158.1	predicted protein [Thalassiosira pseudonana CCMP1335]	1.49694	91	0.0001	0.00219734	0.944268	87	0.0029997	0.0403393	1.60275	91	0.0001	0.00211861	1.01795	84	0.515448	0.825195	1.27917	90	0.0001	0.0035271	1.64841	91	0.0001	0.00239976	1.3767	88	0.0001	0.0036731	1.88176	90	0.0001	0.00260844	1.06978	89	0.00139986	0.0323045	1.52805	91	0.0001
11	EED92694.1	179	115577	AWALAATR;LPEAAFFAR;TFEVSELPVR;KIDVAPK;VEEIVSLWK;LPLICSASEDGTVR;DLGACELYPQSIK;GVNCIDYYPSGDKPYILSGADDR	1;1;1;1;1;1;1;1	8	16	59308;59313;59314;102841;150096;150105;150114;209037;215881;242112;242120;242121;295155;295171;295179;364936	XP_002289157.1	coatomer protein subunit beta2 [Thalassiosira pseudonana CCMP1335]	0.947343	16	0.520848	0.807718	0.949563	14	0.0534947	0.284804	0.939584	16	0.263574	0.577444	0.92315	15	0.108989	0.377656	0.997782	16	0.977202	0.994138	0.802034	16	0.00179982	0.0236473	1.02793	16	0.542946	0.871813	0.833149	16	0.00159984	0.0234123	1.02179	16	0.688631	0.916817	1.01443	16	0.848915
12	EED91781.1	526	63442.4	VAALGGGIAR;GVLDVVAIR;AGAAILMK;LVQEVASK;YEDALNSVQSAR;GYISPYFVK;NYGAPEIVNDGVTIAR;IDNVNEIVPLLEQLVK	1;1;1;1;1;1;1;1	8	11	65438;80051;80052;80057;119648;150533;202235;202236;208763;276685;334902	XP_002291674.1	predicted protein [Thalassiosira pseudonana CCMP1335]	0.930938	10	0.291171	0.611527	0.970953	11	0.648835	0.876462	0.815205	11	0.0422958	0.184878	0.812043	11	0.0337966	0.182887	1.17728	10	0.00169983	0.0248617	1.10908	10	0.157884	0.501806	0.958459	11	0.461154	0.831989	0.921324	11	0.230977	0.606947	0.862569	11	0.0422958	0.289477	1.03307	11	0.610039
13	ACI65072.1	1118	52376.9	LIGWGEIK;VGDEIEVRPGIVTK;GEILMVNIGSTGTGGK;ISLTQPVCTQEGEK;QATINVGTIGHVAHGK;YNVDLVCEYLVHK;FVVGTVADSAPILPISAVLK;ISSLYAESNDLQYAVPGGLIGVGTR	1;1;1;1;1;1;1;1	8	12	163786;298155;298160;298161;298162;301678;308983;308987;310584;316427;345975;358274	XP_002296355.1	translation initiation factor eIF-2, gamma subunit [Thalassiosira pseudonana CCMP1335]	0.970277	12	0.757724	0.91516	0.81885	10	0.0001	0.00353298	1.01521	12	0.854115	0.941984	0.774056	12	0.00249975	0.0288753	0.741513	12	0.00019998	0.00553483	0.712318	10	0.0001	0.00239976	0.830478	11	0.00029997	0.00794038	0.729565	12	0.0001	0.00260844	1.06605	12	0.0451955	0.297992	1.32579	12	0.00249975
14	XP_002296387.1	56	49664	DIQEIFR;ILESLDMR;RDIQEIFR;ILVSTDLFGR;ELAFQIAHEYER;LTLHGLQLYYVK;GLAISFISSEPDQEILDK;VNVVINYDFPDDSDQFLHR	1;1;1;1;1;1;1;1	8	22	74331;94316;94321;118882;132455;132458;132459;132462;132465;239349;239351;239358;239361;239367;239376;297150;287835;343765;343766;345400;358831;358836	EED87083.1	dead box family RNA helicase [Thalassiosira pseudonana CCMP1335]	1.3829	21	0.0001	0.00219734	1.29525	20	0.0001	0.00353298	1.22926	22	0.00489951	0.0402923	1.16536	22	0.00159984	0.0201602	0.936214	22	0.278772	0.64614	0.796763	16	0.0001	0.00239976	0.902035	22	0.110989	0.460323	0.802234	21	0.0029997	0.0359964	0.930841	21	0.0320968	0.245848	1.06853	22	0.249575
15	EED93540.1	981	42999.3	CVNVLN;HVHEVAK;GGGQFIAGK;EQGYAIPGVNIVGSNSINACMEAAAK;YGGPIMVTFSK;MNIDTDTQWAFWDGVR;LYGVPVVLHTDHCQK;FVFHGGSGSSVEDIQYAIGAGVIK	1;1;1;1;1;1;1;1	8	40	30683;30686;133352;133354;138133;199197;366142;239004;239023;239025;242631;242632;316258;316259;316260;316261;316262;316263;316264;316265;318154;318155;318156;318168;318169;328654;328655;328656;328657;362435;362436;362440;362441;362442;366650;366651;366652;366653;366654;366655	XP_002290003.1	predicted protein [Thalassiosira pseudonana CCMP1335]	1.53418	40	0.0001	0.00219734	0.975128	39	0.443256	0.750421	1.79045	38	0.0001	0.00211861	1.18513	40	0.0001	0.00261133	0.850046	39	0.00349965	0.0395967	1.34741	39	0.0001	0.00239976	1.07909	40	0.0378962	0.232809	1.61629	40	0.0001	0.00260844	1.21785	39	0.0001	0.0049995	1.53176	40	0.0001
16	EED95736.1	137	36432	VYVVTSI;VWALTNCK;DVLSVAFSVDNR;LWNTLGECK;YWLCAATDECIK;DGTAMLWDLNEGKR;FSPSQSVPLIVSCGWDR;APHCTSLAWSADGSTLFAGYSDK	1;1;1;1;1;1;1;1	8	32	42662;42664;42667;42668;42669;187638;194344;194352;194353;194356;220266;220267;301007;301011;301012;301013;334686;334687;310921;310922;310933;313950;313951;313953;313954;313955;313956;313957;313958;313962;362496;362497	XP_002286095.1	guanine nucleotide binding protein beta subunit-like protein [Thalassiosira pseudonana CCMP1335]	1.33112	32	0.0001	0.00219734	1.03501	32	0.333267	0.685302	1.37262	32	0.0001	0.00211861	1.07432	32	0.247075	0.604111	0.74741	31	0.0001	0.0035271	0.69749	32	0.0001	0.00239976	0.770492	32	0.0001	0.0036731	0.746675	32	0.0001	0.00260844	1.04812	32	0.193381	0.590977	1.12787	25	0.00049995
17	AIR75422.1	84	169203	NFEIIPNIR;GLMADPSGEIMR;LIDIAQDIIIR;EITGDIVQGLPR;GEVIGLLNFEK;EGLTITDYLMSGYGAR;AALNNPSFISAASFQETTR	1;1;1;1;1;1;1	7	7	130940;181780;183781;188202;243306;286848;324093	AIR75563.1	RNA polymerase beta' subunit (chloroplast) [Cyclotella sp. L04_2]	0.741607	7	0.0790921	0.284064	0.812544	6	0.0113989	0.102704	0.674275	7	0.0571943	0.23044	0.758351	6	0.0151985	0.107825	0.859352	7	0.334967	0.704801	0.81938	7	0.241376	0.615406	0.817284	7	0.346265	0.741202	0.778071	7	0.260174	0.639719	0.953764	7	0.535446	0.867098	0.865062	7	0.169883
18	EED92420.1	1422	93076	ADVSGMLR;FFMTDAPR;RFFMTDAPR;FSSITGVVSTEEK;FFGNECDNFGLK;FTYGYQEFVNTYGIPR;LSAIQFTDLNPDLTPFQR	1;1;1;1;1;1;1	7	16	56684;91930;91931;91937;138635;276529;287691;287692;316278;329215;329221;329222;329223;329224;329225;329226	XP_002290668.1	v-type h-atpase [Thalassiosira pseudonana CCMP1335]	0.762353	15	0.00059994	0.00858009	0.879493	15	0.00559944	0.0615256	0.626959	15	0.00039996	0.00610447	0.735279	15	0.00219978	0.0264267	1.37256	16	0.00019998	0.00553483	1.17706	14	0.00129987	0.0187181	1.08301	14	0.221378	0.635535	0.917227	14	0.214479	0.584942	0.834382	15	0.00149985	0.0329235	0.909893	16	0.0541946
19	XP_002296360.1	1451	88189.8	LLTTPSEIR;SVVAGVGAYSR;GVLPPISK;GVSLPAGSIGAAR;IVECGMDIAAGSAICR;VPIAEFGGIQEAMAK;LATQCFDANATVAVPNSLGPGELLVR	1;1;1;1;1;1;1	7	16	105338;115587;130684;130685;130687;143531;282877;285524;285528;305503;305504;307469;307470;307482;307485;361862	ACI65077.1	acyl-CoA dehydrogenase-like protein [Thalassiosira pseudonana CCMP1335]	1.05241	15	0.190181	0.475161	0.934551	16	0.153985	0.515763	1.09876	16	0.330067	0.661972	1.00836	15	0.89581	0.970516	1.24253	16	0.00889911	0.0758744	1.3883	14	0.0001	0.00239976	1.26266	15	0.0001	0.0036731	1.36554	16	0.0001	0.00260844	1.04422	16	0.534447	0.86667	1.16857	16	0.00519948
20	XP_002295809.1	392	72371.8	AVVTVPAYFNDSQR;FSPSQIGSMVLGK;DIQGLVPYNIVK;QAVTNPENTFYAVK;GVNPDEVVAMGAAIQGGVLK;QQTFSTAVDNQPQVQIK;KQQTFSTAVDNQPQVQIK	1;1;1;1;1;1;1	7	30	252872;252873;252874;252875;270322;270323;270326;273333;273334;273335;273336;271803;271804;271805;271806;307992;307993;341316;341317;341318;341319;342422;342424;342425;341806;341809;341810;341812;360917;360918	ACI64526.1	chaperone, heat shock protein 70 [Thalassiosira pseudonana CCMP1335]	0.975931	30	0.730027	0.903383	0.9245	29	0.0116988	0.103849	0.825003	29	0.00179982	0.018956	0.774	30	0.0001	0.00261133	1.44609	30	0.0001	0.0035271	1.25151	30	0.0001	0.00239976	1.23969	28	0.0001	0.0036731	1.08744	30	0.163484	0.49624	0.854698	30	0.00149985	0.0329235	1.06036	30	0.40046
21	XP_002286323.1	674	70570.5	GESQSGAGIVLGK;FSGSGSDTDIITSSAR;STYEIMTPESIGLMR;AGNASLEEVVMSLALK;LYTAINPVYITPTSK;KFSGSGSDTDIITSSAR;QIADVVGNEVFEDGYVPVIAGLSR	1;1;1;1;1;1;1	7	10	239735;259636;283743;314172;315954;319787;319788;325024;325025;357136	EED95964.1	predicted protein [Thalassiosira pseudonana CCMP1335]	0.976327	9	0.735726	0.90617	1.04628	10	0.475352	0.768927	1.05245	10	0.679532	0.888771	1.08303	10	0.364064	0.710003	0.920353	10	0.413659	0.766397	1.00808	10	0.89951	0.977859	1.04036	9	0.30117	0.714031	1.08213	10	0.414759	0.790588	1.04318	10	0.589841	0.889075	0.990949	10	0.855614
22	XP_002289902.1	800	68956	AWSPPPLR;ASQGTLFK;NMPGVIMAMGR;VYDNEQLMLR;FNTVGVSDGISMGTTGMR;FVMEDVQNIGGTPGMIK;ISDVTPFLADLKPSGK	1;1;1;1;1;1;1	7	23	6648;75146;75147;143618;149978;149981;149982;149995;160052;160054;165102;182937;182952;182953;256411;300311;302820;334871;334875;336065;336069;336070;345632	EED93439.1	probable dihydroxyacid dehydratase [Thalassiosira pseudonana CCMP1335]	1.16915	23	0.0433957	0.195987	1.0356	23	0.322468	0.681155	1.30099	22	0.00689931	0.0513457	1.23855	22	0.0001	0.00261133	0.810275	23	0.00119988	0.0189349	0.956937	23	0.363664	0.745113	0.967052	23	0.608739	0.902727	1.19635	22	0.00429957	0.0469044	1.16648	23	0.00119988	0.0287971	1.14504	23	0.0489951
23	AIR75860.1	2	52050.2	AAAAGFEK;ANEPVLSMRPID;SPSGEIIFGGETMR;DIESTGFAWWSGNAR;IKNDIQPWQER;LGANVSSAQGPTGLGK;AMYLGGIYDTWAPGGGDVR	1;1;1;1;1;1;1	7	31	116543;116545;203682;233583;233584;233587;233588;233589;233595;233596;233597;237232;237233;237239;278195;278196;284336;284341;284355;284356;284357;289091;289092;289095;289097;289098;289099;289100;289104;289106;323013	YP_004072563.1;AIR76133.1;YP_009093460.1;AIR75444.1;YP_009093187.1;AIR75585.1;ADB27517.1	photosystem II CP43 chlorophyll apoprotein (chloroplast) [Roundia cardiophora]	0.455756	30	0.0001	0.00219734	0.717811	31	0.0001	0.00353298	0.351512	30	0.0001	0.00211861	0.559636	31	0.0001	0.00261133	1.27589	31	0.0001	0.0035271	1.43616	31	0.0001	0.00239976	1.04073	31	0.242276	0.663378	1.18565	31	0.00029997	0.00642793	0.817342	31	0.00019998	0.0079992	0.663153	27	0.0001
24	XP_002287527.1	497	50090.7	SPLMGLFEK;DFNVDLIPK;LCAIHGGTFMLNR;ECVISGLLSVQGMR;FVVGDPSYFPK;YGTSPYIYPVYGLGGLPEGFSR;NDYYGADCASLNLTNLYK	1;1;1;1;1;1;1	7	20	195488;195489;199694;205415;205416;205421;205423;239357;249054;249055;249056;252428;252429;252430;251465;251466;251467;350669;350670;350979	EED94970.1	probable RabGDI [Thalassiosira pseudonana CCMP1335]	1.22997	19	0.00059994	0.00858009	1.14133	20	0.00569943	0.0622447	1.4551	18	0.0001	0.00211861	1.31983	20	0.00039996	0.00750758	0.922371	20	0.19748	0.539918	0.798849	20	0.0108989	0.0827765	1.06954	20	0.186181	0.581817	0.937087	20	0.276572	0.658748	1.14556	20	0.009999	0.124988	1.02425	20	0.640136
25	XP_002286746.1	1518	45770.7	YYMGGK;AHYELFTR;EAIQHMMIR;NFGCTHFIIGR;GGEDIPEWFAFK;QTPHGGTLVDLILK;WEYLPYSMHMAGPR	1;1;1;1;1;1;1	7	29	103068;107105;107184;199342;134840;134841;134850;139945;139958;139959;139960;139965;139966;139971;194307;194312;194317;194347;278890;278899;278900;278901;278908;278909;294847;294848;294849;294851;327448	EED96387.1	hypothetical protein THAPSDRAFT_1326 [Thalassiosira pseudonana CCMP1335]	1.35146	29	0.0001	0.00219734	1.13029	29	0.0316968	0.201829	1.66501	29	0.0001	0.00211861	1.30199	27	0.0001	0.00261133	0.782647	28	0.0001	0.0035271	0.691073	28	0.0001	0.00239976	0.959456	28	0.313469	0.723389	0.867698	28	0.0029997	0.0359964	1.17709	28	0.00059994	0.0177031	1.1889	29	0.00059994
26	XP_002285992.1	528	44617.2	YAGFTGVR;LSAFAPR;SIFEIEGAR;LVGGYLFPEIGR;GSILVFDAAYAPFIR;AQVVTIPGAGFGPGGEGYLR;ADIVYFCSPNNPTGAAATK	1;1;1;1;1;1;1	7	24	4173;61844;38993;38994;102738;102747;102774;102775;102776;194176;194179;194180;194181;194182;267439;315293;315294;315297;315300;315304;342748;342751;345936;345937	EED95633.1	aspartate aminotransferase [Thalassiosira pseudonana CCMP1335]	1.39098	23	0.0001	0.00219734	1.2138	23	0.00039996	0.0105989	1.48918	24	0.0001	0.00211861	1.44869	23	0.0001	0.00261133	1.00635	23	0.867713	0.971876	1.12189	20	0.0001	0.00239976	1.13019	24	0.0116988	0.109108	1.28773	21	0.0001	0.00260844	1.10694	23	0.0171983	0.172944	1.05696	24	0.332767
27	EED92716.1	530	37347.9	GGLPWQGLK;ELQNAPGFAK;TVLMIADQMLER;FEAKPNIAYLR;DIKPANFVTDGGR;GSGNFIYCIDFGLSK;VGGGSFGDIYLGVGANGEK	1;1;1;1;1;1;1	7	16	176457;208967;208976;208978;208979;208982;219075;222855;226677;226678;226735;226736;264788;277729;319461;331482	XP_002289179.1	casein kinase-like protein [Thalassiosira pseudonana CCMP1335]	0.622995	16	0.0001	0.00219734	0.769963	15	0.0009999	0.0191683	0.568397	14	0.0001	0.00211861	0.727421	16	0.00109989	0.0154844	0.867509	16	0.0425957	0.227388	0.814344	13	0.00179982	0.0236473	0.900534	16	0.134487	0.518364	0.868928	16	0.121488	0.421345	1.05781	15	0.189781	0.588976	0.865948	15	0.010099
28	EED95896.1	1307	32500.6	GTADCFAK;YTGIVDCFSR;VASEQGIGAFWR;LLIQTQDANPK;ADKNTEFAK;YFPTQAFNFAFK;IMKDEGTSALFK	1;1;1;1;1;1;1	7	18	149107;149112;162846;162847;162854;194079;194081;194087;248339;248343;248350;248353;265861;265869;292894;315542;317352;317353	XP_002286255.1	adenine nucleotide translocator; ATP/ADP translocase [Thalassiosira pseudonana CCMP1335]	0.574165	18	0.0001	0.00219734	0.678359	17	0.0001	0.00353298	0.312122	18	0.0001	0.00211861	0.390312	18	0.0001	0.00261133	1.57307	18	0.0001	0.0035271	0.757562	18	0.00329967	0.036663	0.916883	18	0.312869	0.722932	0.436434	18	0.0001	0.00260844	0.603099	18	0.00039996	0.0135835	0.847215	18	0.0234976
29	EED91133.1	291	30398.4	YVYGTAIPSGR;DDLIMHALK;ALVGCVSGDGELTK;LLQVEYAMESVK;RPYGVGLLVASFDK;ILEIDDHLGIGIAGLTADAR;FTLIEGEELQPYLDR	1;1;1;1;1;1;1	7	15	152289;152294;204258;280693;280700;280701;280704;281436;281437;284139;284143;299819;299823;327946;333742	XP_002291026.1	20S proteasome subunit alpha type 1 [Thalassiosira pseudonana CCMP1335]	1.26371	15	0.00189981	0.0207482	1.24336	15	0.00059994	0.0138602	1.15481	13	0.059994	0.236308	1.18557	15	0.00069993	0.0114661	1.01409	15	0.869613	0.971876	0.914942	15	0.370763	0.752965	0.978738	15	0.741826	0.936461	0.892405	15	0.130487	0.443163	0.960844	15	0.49945	0.849726	0.98491	13	0.69943
30	EED93836.1	1308	22315.4	DSSVAVVVYDVTNR;SLIPSYIR;ASFLNTSK;LVFLGDQSVGK;DGLLFMECSAK;GNDVVICLVGNK;HYQATIGIDFLSK	1;1;1;1;1;1;1	7	16	72919;243425;243434;243441;243442;300162;81839;148613;230403;230404;230408;254534;254539;254547;257831;295007	XP_002288400.1	rab-like rab-type small G protein [Thalassiosira pseudonana CCMP1335]	1.1951	14	0.00059994	0.00858009	1.14159	16	0.0193981	0.142675	1.20141	13	0.00549945	0.0438253	1.16202	15	0.00539946	0.049642	1.06235	15	0.311769	0.688187	0.94796	16	0.324368	0.706854	1.13494	15	0.0059994	0.0674933	0.961073	16	0.573143	0.879475	0.988292	16	0.846415	0.965884	1.05017	16	0.369863
31	ACI64514.1	746	57835.7	IFFTGSPNVGRGFYDILRPIIGHLQ	1;1;1;1;1;1;0;0;0;1;1;0;1;1;1	11	19	276807;276812;276813;276814;276815;276816;276817;276818;276819;276820;276821;276822;276823;276824;276825;276826;276827;276828;276829;276830;276831;276832;276833;293512;293513;293514;293515;293516;293522;293523;293524;293525;293526;293527;330750;330751;330752;330753;330754;330755;330756;330757;330759	XP_002295797.1;EJK44886.1	betaine aldehyde dehydrogenase, partial [Thalassiosira pseudonana CCMP1335]	1.02162	1	0.959504	0.98641	0.974209	1	0.931607	0.975829	0.499844	1	0.241976	0.553272	0.544115	1	0.138386	0.44006	1.29758	1	0.471653	0.80547	0.979078	1	0.963904	0.989491	0.746573	1	0.343066	0.741202	0.501676	1	0.118588	0.416099	0.681955	1	0.137786	0.508965	1.04632	1	0.882812
32	XP_002291363.1	651	136373	FSWVIETR;AMEFLHFR;TDIPVVIIFR;VFIGPTFYQR;NTYQSAMGK;EFLGYVPIMLR	1;1;1;1;1;1	6	11	107417;111081;111082;115796;148988;148989;166217;166218;189667;198520;202687	EED91470.1	DNA directed RNA polymerase II, second largest subunit [Thalassiosira pseudonana CCMP1335]	0.811604	9	0.00369963	0.0337286	0.902222	10	0.00259974	0.0374779	0.721511	9	0.00029997	0.00478094	0.850798	11	0.0269973	0.158466	1.20427	10	0.0251975	0.158497	0.931391	11	0.541246	0.859515	1.05528	9	0.166583	0.549799	0.821418	10	0.0264973	0.167941	0.94938	11	0.281472	0.687448	0.967884	10	0.547245
33	YP_009093407.1	152	83908.3	LNFAPTIQPR;NVQVFVEK;ALGRPQDMFSDK;DLMAQLYPSFGK;DYTPANNYNNLLDR;LLDAGVSPQEIPLPHEFIINR	1;1;1;1;1;1	6	24	143788;143789;178805;178807;178814;272937;272939;272940;275911;275913;273923;273924;273937;273938;273939;276939;276945;276958;275510;275512;349017;349019;349020;349023	AIR76080.1	photosystem I P700 apoprotein A1 (chloroplast) [Thalassiosira weissflogii]	0.532701	24	0.0001	0.00219734	0.705303	24	0.0001	0.00353298	0.392341	24	0.0001	0.00211861	0.523103	24	0.0001	0.00261133	1.76058	24	0.0001	0.0035271	1.45758	23	0.0001	0.00239976	1.36387	24	0.0001	0.0036731	1.10931	24	0.0945905	0.370919	0.781484	24	0.0001	0.0049995	0.792888	24	0.00029997
34	XP_002288886.1	173	80286.8	IIDYVAIGPR;VAVESGFPFVR;IWPAHVIK;DMIDDALLRPGR;TLLMVAEMAK;SDSGVSDSVVNQLLSK	1;1;1;1;1;1	6	9	131253;159910;159911;179168;207177;207178;216932;314560;314564	EED94322.1	predicted protein [Thalassiosira pseudonana CCMP1335]	0.882045	9	0.183882	0.465386	1.09034	8	0.0519948	0.280523	0.810995	8	0.0289971	0.143472	1.15837	9	0.0642936	0.279174	0.94155	9	0.567443	0.856624	0.840194	9	0.0891911	0.359159	0.913467	8	0.358164	0.749646	0.81945	8	0.0275972	0.170705	1.03543	9	0.641636	0.90655	0.796953	9	0.00559944
35	EED93364.1	1484	76705.2	DYQFMLR;IMPSYIER;AASVETWAK;LAMACPALPLCGLAQTEAER;AADHMGFVPK;LKQPAGELPPDLYR	1;1;1;1;1;1	6	25	88500;103588;103594;192123;178694;178695;203624;338324;338326;338327;208447;208449;208451;208453;208455;212402;212403;309810;309811;309812;309813;309814;309815;309816;309817	XP_002289827.1	predicted protein [Thalassiosira pseudonana CCMP1335]	1.41038	23	0.0001	0.00219734	1.27921	25	0.00029997	0.00858009	1.42518	24	0.0001	0.00211861	1.34358	25	0.0001	0.00261133	0.972342	22	0.50405	0.828823	0.724896	22	0.0001	0.00239976	0.961764	25	0.348265	0.741202	0.767103	25	0.0001	0.00260844	1.05213	25	0.214579	0.615201	1.02675	25	0.625337
36	XP_002294274.1	415	76079.1	TPVDGLLR;VLCLESHIK;TVDEFVTVPFLR;AVVSNATPFDTVK;MIFDILEETMPVK;YSFEVGPSIFEGLDRPSLNPLR	1;1;1;1;1;1	6	12	61915;61922;214919;219849;219854;219857;219858;219859;269955;306200;355135;355136	EED88629.1	hypothetical protein THAPSDRAFT_10233 [Thalassiosira pseudonana CCMP1335]	1.05814	11	0.305469	0.622688	1.01841	12	0.723328	0.902269	0.940401	12	0.533347	0.811282	0.954797	12	0.453555	0.788905	0.916525	12	0.233677	0.584367	1.48444	12	0.00239976	0.0287971	0.874612	12	0.0128987	0.115511	1.43778	12	0.00349965	0.0393711	0.987781	9	0.687431	0.916817	1.01727	12	0.844316
37	XP_002290530.1	597	68481.6	QMSTLIK;LGSFVISGVQR;FEELNAVLFK;TNKVEVIESPSGR;AKFEELNAVLFK;ELRPEEISAMVLAELK	1;1;1;1;1;1	6	19	133624;145616;241366;241367;241371;241374;282485;282487;323308;323309;323310;334148;334189;334190;334191;335462;335465;335466;335467	EED92282.1	heat shock protein, HSP70, hsc70 [Thalassiosira pseudonana CCMP1335]	0.795448	19	0.00139986	0.0163802	1.00289	18	0.956904	0.983652	0.807255	18	0.0134986	0.0859048	1.0018	16	0.976602	0.993645	0.708136	19	0.00489951	0.0486973	0.613113	19	0.00079992	0.0128559	0.794548	19	0.0435956	0.260705	0.688786	19	0.00639936	0.0629445	1.03247	17	0.411259	0.788356	0.852561	17	0.0059994
38	EED88796.1	1633	49384.2	GYPSIGDAK;AWIDQFENAPIGGGLAK;YAESAGVPVYK;YEVPHHPLHAK;VMVVDTFHLFPETMEFLR;CNPIAYWTLEDTFDYIAK	1;1;1;1;1;1	6	33	161137;161139;161146;161162;161165;241814;186911;330583;330595;330597;330599;330600;330603;235258;235276;265854;265855;265856;265857;314191;314192;314193;339943;339951;341126;341127;341128;341129;341130;342294;342295;342296;356352	XP_002293787.1	phosphoadenosine-phosphosulphate reductase [Thalassiosira pseudonana CCMP1335]	1.19699	32	0.0001	0.00219734	0.88813	30	0.00349965	0.0460319	1.66759	29	0.0001	0.00211861	1.22649	30	0.0001	0.00261133	0.782219	31	0.00059994	0.011361	0.926237	31	0.347265	0.726371	1.02963	30	0.424358	0.804893	1.26466	28	0.0001	0.00260844	1.38239	29	0.0001	0.0049995	1.25758	32	0.00019998
39	ADB27483.1	222	39569.6	LALQLNVIDPK;FGMHAEIR;AFEPGLLAK;IPMVDLPLGATEDR;AIADLLPEIEVIK;FVLVGSGNPEEGELRPQLLDR	1;1;1;1;1;1	6	15	73682;244577;244578;244579;85148;173200;173204;244215;244216;244221;244223;244224;244231;283877;347292	YP_004072529.1	magnesium chelatase ATPase subunit ChlI (chloroplast) [Thalassiosira oceanica CCMP1005]	0.915361	15	0.209879	0.504943	0.971491	14	0.581642	0.847059	1.26185	15	0.00079992	0.0100046	1.3231	14	0.00019998	0.00462005	0.485412	15	0.0001	0.0035271	0.826666	15	0.0156984	0.107442	0.643533	14	0.0001	0.0036731	1.1834	15	0.019598	0.133623	1.29003	14	0.00029997	0.0105872	0.992111	15	0.905209
40	EED94198.1	1576	38767.1	LLSFPTILEK;TTTSCCLGTQLAK;NILEQESLQWIFVGGK;FGIDSHNIVVNQVLFPEK;VLIVSTDPAHNLSDAFCQK;QVQNMDYDVVVFDTAPTGHTLR	1;1;1;1;1;1	6	9	229925;286520;336764;349124;349125;351937;355680;355681;356224	XP_002288762.1	anion-transporting ATPase [Thalassiosira pseudonana CCMP1335]	1.06365	9	0.527547	0.809745	1.18867	8	0.00539946	0.0611939	1.1619	9	0.30117	0.624174	1.3015	5	0.00749925	0.0634444	0.72868	9	0.0118988	0.0926431	0.724096	9	0.0159984	0.10826	0.770879	8	0.00089991	0.016362	0.75663	8	0.00119988	0.0183033	1.17362	8	0.00629937	0.0929415	0.953557	9	0.605739
41	XP_002292331.1	1296	31903.2	GGAIFLVEGLR;AFLPGSHLTGR;GTVVQYDK;GDVIDGIVK;GGCIVDIGAK;CMIIDHDK	1;1;1;1;1;1	6	15	135854;135855;135856;143517;143519;161905;161906;161910;163738;163739;163740;163752;187110;187119;197961	EED90306.1	RS1, ribosomal protein 1, partial [Thalassiosira pseudonana CCMP1335]	1.03061	13	0.465353	0.765116	0.996235	15	0.947405	0.978972	1.091	14	0.132187	0.397918	1.0122	15	0.868313	0.957003	0.679428	15	0.00189981	0.0262904	0.77121	15	0.020498	0.132721	0.704779	15	0.00059994	0.0130107	0.837725	12	0.00139986	0.0208244	1.02646	15	0.629637	0.90177	1.04168	15	0.513449
42	EED96084.1	24	20987.7	NISFTVWDVGGQDK;ILMVGLDAAGK;DAVLLVFANK;HYYQNTQGLIFVVDSNDSDR;MLNEDELRDAVLLVFANK;LGEVVTTIPTIGFNVETVEYK	1;1;1;1;1;1	6	18	43029;306149;306151;306154;212233;212236;216199;216222;216230;212787;212788;212790;212791;212794;349579;349581;350740;359313	XP_002286443.1;EJK46251.1	adp-ribosylation factor [Thalassiosira pseudonana CCMP1335]	1.10481	18	0.0236976	0.125968	1.06926	17	0.0647935	0.311354	1.11407	17	0.069893	0.256369	1.14393	16	0.00159984	0.0201602	1.12005	18	0.10269	0.387293	1.03866	18	0.608339	0.888086	1.21116	18	0.00129987	0.021079	1.14053	18	0.0456954	0.23739	1.06163	18	0.236976	0.635704	1.02626	18	0.559544
43	EJK60528.1	251	12896	KGMSIMNSFINDIFER;LMLPGELAK;QVHPDTGISK;VESYSTYIYK;RVESYSTYIYK;GMSIMNSFINDIFER	1;1;1;1;1;1	6	39	84888;339600;340732;340733;340738;340742;340749;341943;341946;341951;341957;181680;181691;181693;181694;181695;186501;186504;210795;210797;210798;210801;250813;305019;281218;291071;293672;293674;293675;293676;293677;293680;296380;296382;296383;296384;296386;296387;296388	EJK69581.1;EJK52561.1;ACI64888.1;XP_002295813.1;EED92608.1;EED88842.1;ACI64530.1;XP_002296171.1;XP_002290856.1;EED93631.1;XP_002288195.1;XP_002293833.1;EJK74337.1;EJK66208.1;EJK71317.1;EJK52043.1;EJK62506.1	hypothetical protein THAOC_19091 [Thalassiosira oceanica]	0.594464	39	0.0001	0.00219734	0.603866	37	0.0001	0.00353298	0.438694	38	0.0001	0.00211861	0.431812	39	0.0001	0.00261133	1.05446	39	0.434357	0.781166	1.15908	39	0.0153985	0.106196	0.881888	38	0.0259974	0.182794	0.939048	39	0.308869	0.696697	0.842403	38	0.00019998	0.0079992	1.11741	39	0.00249975
44	EED96258.1	73	90129.3	EMIELPLR;MEELSLFR;GPELLTMWFGESEANVR;KGDLFLVR;GVLLYGPPGSGK;GVLFYGPPGCGK;DLAQYASFAQTLQQSR;LDQLIYIPMPDYESR;AVANECQANFISVK;VMNQLLTEMDGVGAK;FTGADLTEICQSACK;NAPAIIFIDEIDSIAPK;QAAPCVLFFDELDSIAQQR;SVSDRDLAQYASFAQTLQQSR;ETHGFVGADIAALCTEAAMQCIR;AVANETGAFFFLINGPEIMSK;VVETDPAPYCIVAPDTVIHCEGEPVKR	1;1;1;1;1;0;1;1;1;1;1;1;1;1;1;1;1	16	60	96719;96720;96724;96725;96726;96727;101174;101175;101184;101185;101198;101200;103585;103586;108220;108243;108244;157550;315888;315892;173967;173970;226124;226129;226138;226142;226143;226144;226145;226179;250627;250631;250632;250637;299881;299890;299891;303854;303858;304134;304135;304141;304142;310950;310956;310957;312867;312871;322040;322041;322044;322045;322047;334074;339734;349607;349609;349610…	XP_002286617.1	hypothetical protein THAPSDRAFT_267952 [Thalassiosira pseudonana CCMP1335]	1.10904	59	0.0029997	0.0289062	1.02976	60	0.309069	0.677546	0.943604	59	0.124988	0.384441	0.872076	58	0.0001	0.00261133	0.957941	60	0.357464	0.728074	0.816744	60	0.0001	0.00239976	0.850831	60	0.00019998	0.00571371	0.729711	60	0.0001	0.00260844	0.887929	58	0.0001	0.0049995	1.10155	57	0.00089991
45	XP_002296690.1	818	86331.1	LGDTSLIARQSLTVD	1;1;1;1;1;0;1;1;0;1;1	9	11	286007;286008;286009;286010;286012;304217;304219;304220;304221;304225;306296;306299;306304;336360;336361;336362;337442;337449;337452;338503;338506;338507;338509;338511;338515;338516;338517;338518	EED86891.1	urease, urea [Thalassiosira pseudonana CCMP1335]	0.849875	1	0.691031	0.885651	0.681149	1	0.192881	0.565952	1.23257	1	0.675432	0.887538	0.971672	1	0.938506	0.979264	0.846396	1	0.647335	0.906549	0.780672	1	0.559244	0.865488	1.26896	1	0.435356	0.807512	1.19208	1	0.657534	0.915893	1.4527	1	0.145685	0.524468	1.28606	1	0.411359
46	EED96094.1	785	37597	GAFVVNIGDMFER	1;1;1;1;1;0;1;1	7	12	227396;227397	XP_002286453.1	predicted protein [Thalassiosira pseudonana CCMP1335]	1.1651	2	0.627837	0.861662	0.920828	2	0.669333	0.884231	0.725636	2	0.367163	0.686142	0.619821	2	0.0613939	0.271822	1.01868	2	0.940106	0.99014	1.16483	2	0.584442	0.882546	0.709999	2	0.119488	0.482239	0.761058	2	0.305769	0.694054	0.779053	2	0.148985	0.52483	1.21025	2	0.371263
47	BAH30220.1	366	48729.4	SVVAAGLAK;TLESITLK;LCDQVSDAVLDACLK;MEFDARPGALAR;YNVTAAYCHFGR;FIIGGPQGDAGLTGR;DDCHVHLNPSGK;DGSLWWLRPDGK;IHTVLISTQHAEPGK;EIGFSSFVDDLSSVESK;KDGSLWWLRPDGK;IIIDTYGGWGAHGGGAFSGK;TQVTIAYDQLADGSVVPTK;DNMVMVFGEISTAANLDYEK	1;1;1;1;1;0;1;0;0;0;0;0;0;0	6	13	132252;132256;160323;160324;160325;169825;197484;197485;197487;197488;228253;228254;228367;228368;228370;228375;228378;228382;228384;228390;275574;284871;314044;314046;314049;314050;314051;314053;314054;335608;336860;343883;343886;346445;346446;346447;346448;346451;359337;357240	-	methionine S-adenosyl transferase, partial [Skeletonema costatum]	1.00022	27	0.9958	0.999555	0.706644	26	0.0001	0.00353298	1.21473	27	0.0146985	0.0912829	0.823431	26	0.0001	0.00261133	0.585402	25	0.0001	0.0035271	0.611152	26	0.0001	0.00239976	0.755239	26	0.0001	0.0036731	0.75809	26	0.0001	0.00260844	1.21168	27	0.0001	0.0049995	1.40742	26	0.0001
48	XP_002288652.1	371	38206	YTVLSALEGR;SHPDLCLK	1;1;1;1;1;0;0;1;1;1;1;1;1	11	12	128670;128677;128678;180927;180938	EED94088.1	predicted protein [Thalassiosira pseudonana CCMP1335]	0.991095	5	0.941606	0.984222	1.04684	5	0.740926	0.908883	0.923629	5	0.445755	0.744718	0.955559	3	0.728027	0.907011	1.01759	5	0.914309	0.983599	0.830115	5	0.442056	0.805278	0.983789	5	0.824618	0.960291	0.808312	5	0.0958904	0.372792	0.963978	5	0.79512	0.945559	0.959553	5	0.659234
49	EED92064.1	635	106672	VLPFDAK;AVFGEVYPDPVR;TLVELMGDTFPELR;EADGSLRPLPAQHVDTGMGFER;DNFWEMGATGPCGPCTEIHYDR	1;1;1;1;1	5	11	124006;201316;201317;201322;263632;263633;266892;266894;266895;350249;359282	XP_002290312.1	alanine-trna ligase [Thalassiosira pseudonana CCMP1335]	0.864323	11	0.0856914	0.298113	0.937312	10	0.333467	0.685302	0.811292	8	0.00349965	0.0316727	1.03153	9	0.448655	0.787157	0.736821	10	0.0245975	0.157477	0.639395	9	0.0009999	0.0153831	0.665193	11	0.00289971	0.0395415	0.619027	11	0.00079992	0.014256	0.964943	11	0.643736	0.90738	0.86224	10	0.00219978
50	EED93013.1	1142	94565.2	TQGIALSLGDR;MAEVTVSAQK;SMWAEFEWENK;SVFGEDALVNVSVEK;TPNTLANLTVELSTMGDMK	1;1;1;1;1	5	7	135466;135467;210196;288961;309348;309357;348149	XP_002289476.1	coatomer protein subunit beta 1 [Thalassiosira pseudonana CCMP1335]	0.807435	7	0.0256974	0.132684	0.937856	7	0.384062	0.707647	0.805385	6	0.0307969	0.1491	0.903908	6	0.117288	0.394988	1.11446	7	0.233877	0.584367	0.87136	7	0.20258	0.563277	1.03369	7	0.590741	0.897328	0.813097	7	0.0586941	0.277295	0.928081	7	0.50125	0.850056	0.922503	6	0.159384
51	XP_002293335.1	1247	77340.7	AFPLYPK;TLYNNLELFR;ANIIAYWAPEHK;FAIIHAENPTSTK;VNEPGIPVEMLDVK	1;1;1;1;1	5	6	138509;183696;281936;284706;302604;302605	EED89071.1	predicted protein, partial [Thalassiosira pseudonana CCMP1335]	0.831561	6	0.216378	0.513554	0.73766	5	0.00249975	0.0372277	0.711056	5	0.00819918	0.0585981	0.695353	6	0.0321968	0.176886	0.924575	5	0.384462	0.750159	0.983808	6	0.889811	0.974948	0.850181	6	0.0263974	0.184884	0.803287	4	0.0678932	0.308606	0.818343	6	0.137386	0.508838	0.96508	6	0.80012
52	EED90959.1	1189	76353.1	VLSYYGDTPR;ASNPLVMVQSYR;TLFDLQETTAK;GMVESALEFADICR;SAVGIGTLLADGLGDTVR	1;1;1;1;1	5	9	148156;148161;148163;205291;209350;253788;258980;258982;281586	XP_002292108.1	gcpe-like protein [Thalassiosira pseudonana CCMP1335]	0.856367	9	0.0630937	0.246093	1.04016	9	0.662634	0.884231	0.817133	9	0.0806919	0.284953	1.01481	9	0.866113	0.956266	0.850204	9	0.0819918	0.342235	0.857306	8	0.0106989	0.0826527	0.843928	9	0.146285	0.523162	0.85214	7	0.0177982	0.124657	0.98443	9	0.779722	0.945559	0.899335	8	0.146285
53	EED90927.1	718	69638.1	DFSSTISR;LLGQFELSGIPPAPR;NQLEAYLYNLK;VINEPTAAAIAYGLDK;SQVFSTYADNQPGVNIQVFEGER	1;1;1;1;1	5	7	72242;258463;258489;273754;315771;358469;358470	XP_002292076.1	luminal binding protein, partial [Thalassiosira pseudonana CCMP1335]	0.87532	6	0.0577942	0.232987	1.08773	6	0.0950905	0.394744	0.805789	7	0.164184	0.454216	1.02377	7	0.847415	0.950588	1.22782	7	0.0725927	0.316209	1.14956	5	0.128887	0.44684	1.23493	6	0.0284971	0.193566	1.18734	6	0.0291971	0.178758	0.938013	7	0.542946	0.867651	0.811782	5	0.0142986
54	XP_002289528.1	1133	68132.5	YFCHDVR;NLGIGAQFGGK;TPEGYASGSFGPTTAGR;HGASCPVGIGVSCSADR;ILPGCQDTGTAIVMGK	1;1;1;1;1	5	6	188919;205691;270397;270398;284079;317455	EED93065.1	fumarate hydratase [Thalassiosira pseudonana CCMP1335]	1.28485	6	0.00819918	0.0557544	1.26186	6	0.0748925	0.34303	1.17888	6	0.356664	0.680458	1.14449	5	0.0912909	0.337795	1.12547	6	0.136986	0.455015	1.14727	5	0.209479	0.57479	1.0718	6	0.472953	0.84122	0.947425	6	0.685131	0.927943	0.962308	6	0.657634	0.911202	0.971247	6	0.845515
55	EED87388.1	609	67323.7	FPHAVLEVK;TAFQIPFDATVR;EMLQVVQVK;SVPYWVDDASIR;ISLDTNLCMISER	1;1;1;1;1	5	6	200177;205617;208802;208810;216015;249637	XP_002295322.1	predicted protein [Thalassiosira pseudonana CCMP1335]	0.928256	5	0.337666	0.655684	0.959541	6	0.561244	0.829191	0.899554	5	0.285071	0.604016	0.898891	5	0.162384	0.480485	1.20034	6	0.070493	0.310826	0.979719	6	0.859614	0.971496	1.06516	6	0.283272	0.702176	0.874917	6	0.233377	0.610578	0.893305	6	0.212179	0.615201	1.02471	6	0.657534
56	XP_002287939.1	1153	65803.3	ILPQHVFNQK;GLLTPPPSR;GTPFVVALNK;DPIIVGVEVVEGILK;GCPEYATILAFDVPVER	1;1;1;1;1	5	7	16357;78994;78996;201786;201789;307848;314223	EED95382.1	predicted protein [Thalassiosira pseudonana CCMP1335]	0.65869	7	0.00039996	0.00655207	0.891528	7	0.279372	0.653803	0.719654	7	0.00379962	0.0330585	1.08153	6	0.336166	0.694899	0.698377	7	0.00949905	0.0791148	0.65518	5	0.00129987	0.0187181	0.788405	7	0.0452955	0.267318	0.728596	7	0.00939906	0.0801816	1.10871	7	0.29887	0.70139	0.785438	7	0.0590941
57	EED90361.1	406	57252.8	YAGISTCFR;EFYESLGFPYR;VVCIVSGALNDAAVK;GYQVLQPPYFMNK;VPEVLVPFMGGIDFLPFER	1;1;1;1;1	5	14	118167;215974;215975;215978;280984;280985;280987;298768;298769;298772;308307;336494;337665;337669	XP_002292386.1	seryl-trna synthetase [Thalassiosira pseudonana CCMP1335]	1.29736	12	0.00249975	0.0254494	1.01949	13	0.739626	0.907906	1.04729	10	0.486551	0.776155	0.855172	13	0.0160984	0.112877	0.928637	11	0.145785	0.467501	0.843237	12	0.00879912	0.0736671	0.753055	14	0.00139986	0.0222987	0.672179	14	0.00129987	0.019498	0.798294	14	0.00439956	0.0726533	1.21592	12	0.00079992
58	EED89316.1	912	55250.1	GGAGFPSGLK;LFAISGHVK;EGTSWLEDILIR;IFTNLYGEQDWR;NACGSGYDFDVYLHR	1;1;1;1;1	5	6	155786;155787;181657;221895;247512;291064	XP_002293580.1	hypothetical protein THAPSDRAFT_29850 [Thalassiosira pseudonana CCMP1335]	1.56607	6	0.00069993	0.0095551	1.48032	4	0.00089991	0.0178202	1.54636	5	0.00309969	0.0284824	1.52992	4	0.00229977	0.0272644	0.981378	4	0.845515	0.962403	0.817072	5	0.049595	0.24391	0.973169	4	0.759024	0.943136	0.817248	5	0.0663934	0.30332	0.955606	6	0.414259	0.78842	1.01676	4	0.849615
59	EED88448.1	125	52766.9	VLVFVETK;EGVEIVIATPGR;NTVVYGGVPK;NMVGISATGSGK;SCQATLLVATDVAAR	1;1;1;1;1	5	7	169718;169719;170249;198639;220556;224414;254770	XP_002294093.1	atp-dependent RNA helicase [Thalassiosira pseudonana CCMP1335]	0.622433	7	0.00379962	0.0337286	0.668511	7	0.0029997	0.0403393	0.598311	5	0.00059994	0.00806337	0.653805	7	0.00029997	0.00607355	0.791195	7	0.167183	0.501271	0.775251	7	0.207179	0.572846	0.817548	7	0.0113989	0.107802	0.804829	7	0.0447955	0.234395	1.02895	7	0.805319	0.950094	0.978056	7	0.633137
60	EED94786.1	1259	52725.4	SSLNSTMK;NHVENPVTLLL;EAVMMTATLSCDHR;EPQACALALGVIENR;VVDGAVGAQWLSAFK	1;1;1;1;1	5	10	148566;172809;266978;267561;267562;267563;267572;267574;303782;303794	XP_002287343.1	dihydrolipoamide s-acetyltransferase [Thalassiosira pseudonana CCMP1335]	1.00788	10	0.963104	0.98641	1.00886	10	0.831817	0.93742	0.771087	10	0.219178	0.525619	0.787784	10	0.0405959	0.208416	1.17228	10	0.172883	0.508196	1.23584	8	0.00859914	0.0726688	0.945261	10	0.518148	0.865197	0.992914	10	0.933607	0.986369	0.811794	10	0.0231977	0.210733	1.00487	10	0.980702
61	XP_002295597.1	854	51872.5	VILTASGGAFR;ITLDSATMMNK;EDVGLGFLDIPK;ETLISGGPVINPLVEK;QGGTMTAVLNAANEAANEMFR	1;1;1;1;1	5	8	123338;244676;248215;260981;260984;260985;318135;338898	ACI64314.1	1-deoxy-D-xylulose 5-phosphate reductoisomerase [Thalassiosira pseudonana CCMP1335]	1.23287	7	0.0325967	0.158755	1.06542	7	0.121588	0.449717	1.33884	8	0.069693	0.256157	1.20083	8	0.00179982	0.0222142	0.831396	8	0.0386961	0.214198	1.21332	8	0.0380962	0.20717	1.04483	7	0.420758	0.804098	1.52121	6	0.0001	0.00260844	1.17136	8	0.0505949	0.320672	1.12635	8	0.335666
62	ACI64945.1	331	46682.2	FSLGPCAER;SSIPTIEYLK;IIIGGGMVFTFLK;FLQPSVSGFLLAK;AGDMSHISTGGGASLELLEGK	1;1;1;1;1	5	21	107063;107065;107068;227555;227573;227574;227576;227577;227578;227579;227581;227582;227583;227585;288849;278984;281822;280939;280940;347778;347791	XP_002296228.1	predicted protein [Thalassiosira pseudonana CCMP1335]	1.54349	21	0.0001	0.00219734	1.56967	21	0.0001	0.00353298	1.80334	21	0.0001	0.00211861	1.86002	21	0.0001	0.00261133	1.12469	20	0.0089991	0.076365	1.45259	19	0.0001	0.00239976	1.18835	19	0.00039996	0.00959904	1.59749	19	0.0001	0.00260844	1.07695	19	0.0575942	0.344417	1.02318	19	0.528447
63	EED92725.1	1220	46023.2	FFSYIPGMMSR;EIAALLVLDK;DDLVGQYVGHTAPK;VKEIAALLVLDK;AMGGVLLVDEAYYLYNAANDR	1;1;1;1;1	5	14	197880;211581;211582;296180;296184;296189;296193;296194;296195;296196;296197;296198;312195;347759	XP_002289188.1	predicted protein [Thalassiosira pseudonana CCMP1335]	0.93087	12	0.158284	0.438812	1.12021	11	0.010299	0.0966601	1.27808	13	0.00059994	0.00806337	1.55584	12	0.0001	0.00261133	0.981738	14	0.831217	0.959178	0.98877	12	0.886511	0.974912	1.33779	14	0.0001	0.0036731	1.52836	14	0.0001	0.00260844	1.33067	14	0.00149985	0.0329235	0.804257	14	0.00519948
64	EED90225.1	79	42761.5	ITEAGLTCR;DKITEAGLTCR;DVVHCMETAQYLR;IDYLNSVDTTIMGSR;QFECSVIDFFAK	1;1;1;1;1	5	9	102312;253106;253108;263803;266983;279017;279018;294600;294601	XP_002292250.1	histidine decarboxylase, partial [Thalassiosira pseudonana CCMP1335]	0.880794	9	0.231277	0.534309	1.04031	9	0.577742	0.844356	0.881143	9	0.226777	0.531113	1.02594	7	0.628237	0.885578	0.977564	9	0.825417	0.955132	0.832211	9	0.0931907	0.367858	1.01668	9	0.887911	0.978714	0.874245	9	0.310869	0.699532	1.03153	9	0.517948	0.861993	0.804077	8	0.00649935
65	XP_002293912.1	1005	40788.5	VNPEVLLK;QSFELSSMGIR;WALHYYGVEAGK;MLLDGTLPQTIGGGIGQSR;CAHIGEVQHGWYNPK	1;1;1;1;1	5	30	162577;162578;162582;162584;162585;162586;174753;174757;179979;179986;278489;278495;278498;278499;321725;311410;311411;311412;311413;311414;311418;313390;313391;313397;313398;313400;313401;331384;351197;351202	EED88921.1	aspartate-ammonia ligase [Thalassiosira pseudonana CCMP1335]	0.890577	30	0.247575	0.557431	1.06744	30	0.278472	0.653803	0.907866	30	0.443356	0.742252	1.10611	30	0.125187	0.411657	1.082	27	0.172783	0.508196	0.929006	29	0.39586	0.767833	1.01824	27	0.672833	0.918891	0.916065	29	0.186981	0.541103	1.01833	29	0.721828	0.926988	0.849452	30	0.160184
66	XP_002288703.1	570	36249	AHQVVEDGYEFFAR;ICGDVHGQYYDLLR;QSLETICLLLAYK;DLLISQPMLLELEAPIK;IFCTHGGLSPELTSLDQVK	1;1;1;1;1	5	14	272656;272659;272660;272662;272666;280472;280476;304292;304293;304294;341171;342328;351300;351301	EED94139.1	serine threonine protein phosphatase [Thalassiosira pseudonana CCMP1335]	1.0672	11	0.377662	0.701595	1.11389	14	0.210479	0.584412	1.50945	14	0.00309969	0.0284824	1.27742	13	0.0001	0.00261133	0.821775	12	0.0260974	0.161894	0.753078	11	0.00029997	0.00574411	0.936716	14	0.372063	0.763641	0.906823	14	0.158684	0.488259	1.11223	14	0.186381	0.582056	1.20215	14	0.0338966
67	XP_002289356.1	1025	28555.1	GTFIEFR;SGMMNISPIGR;ITVGIVGGSDLPK;YLADVDIPVKR;IIALFDVDGTLTIPR	1;1;1;1;1	5	8	61623;145517;150626;251541;251543;251544;258079;268225	EED92893.1	phosphomannomutase [Thalassiosira pseudonana CCMP1335]	1.21258	8	0.0079992	0.0550174	0.903743	8	0.0838916	0.365151	1.82311	7	0.0001	0.00211861	1.29551	6	0.00259974	0.0298391	0.589239	7	0.00049995	0.0097762	0.840418	8	0.10039	0.385292	0.835747	7	0.00539946	0.0627034	1.14496	7	0.117488	0.415723	1.38744	8	0.00059994	0.0177031	1.30813	7	0.00029997
68	EED94121.1	563	28004.8	DSTLIMQLLR;VVTSIEQK;NLLSVAYK;ASASAALDAYQSATEVASSDLPPTHPIR;KASASAALDAYQSATEVASSDLPPTHPIR	1;1;1;1;1	5	40	154145;154154;154156;154160;154161;154162;154163;154165;154166;154167;159217;159229;159236;159241;159242;159243;159244;159246;159247;159268;159269;159976;159990;159992;159993;159998;161338;161339;161340;161341;161342;241859;241860;176856;176864;364053;364054;364055;364057;368228	XP_002288685.1	14-3-3-like protein [Thalassiosira pseudonana CCMP1335]	1.49665	40	0.0001	0.00219734	1.23671	40	0.0001	0.00353298	1.29709	40	0.0001	0.00211861	1.08818	40	0.0806919	0.315416	1.17221	36	0.00289971	0.0347772	1.31101	39	0.0001	0.00239976	1.13666	39	0.00729927	0.0772864	1.21843	40	0.0001	0.00260844	0.886111	39	0.00049995	0.0157879	1.21929	39	0.0001
69	XP_002287767.1	1469	24846.7	HLTGEFEK;LILVGDGGVGK;NLQYYDISAK;FNVWDTAGQEK;VCENIPIVLTGNK	1;1;1;1;1	5	11	177940;197104;197126;242442;242452;259218;259220;259226;259265;289111;289112	EED95210.1;EJK76514.1	ran-type small G protein [Thalassiosira pseudonana CCMP1335]	1.33709	11	0.00249975	0.0254494	1.29306	11	0.00029997	0.00858009	1.2539	11	0.00589941	0.0461949	1.23914	11	0.00289971	0.0318614	0.984298	11	0.79682	0.95303	0.994683	10	0.928107	0.980523	0.960416	11	0.29847	0.712538	0.927155	11	0.170583	0.509203	0.964712	11	0.424358	0.791548	1.02755	11	0.681632
70	EED94931.1	749	22428.2	GDATYLIVK;AGDHSLAQGLK;KAGDHSLAQGLK;FMCPCHGSQYAPTGAVVR;EDGTLQDYGLNAVCTHLGCVVPWSAANNK	1;1;1;1;1	5	39	184149;184150;184155;184156;184158;184159;184160;184161;184162;184163;184164;184170;184171;184172;184173;257215;214418;214424;214427;214432;214441;214442;214443;214451;300955;300956;300959;300960;300964;300965;300966;300967;325499;325500;325501;327063;327064;327067;369322	XP_002287488.1	predicted protein [Thalassiosira pseudonana CCMP1335]	0.713961	36	0.0001	0.00219734	0.678799	38	0.0001	0.00353298	0.9477	38	0.427557	0.732665	0.905902	39	0.0910909	0.337795	0.726074	39	0.0001	0.0035271	0.760649	39	0.0001	0.00239976	0.940306	37	0.323568	0.728242	1.02181	37	0.70183	0.93588	1.26989	37	0.0001	0.0049995	1.12211	36	0.00069993
71	XP_002286889.1	1487	60265.5	AGLPYLTSDR	1;1;1;1;0;1;1;0	3	6	123586	EED96530.1	Long-chain-fatty-acid--CoA ligase, partial [Thalassiosira pseudonana CCMP1335]	0.923976	1	0.839916	0.955511	0.998966	1	0.9968	0.9986	0.847719	1	0.737026	0.907303	0.923094	1	0.820018	0.938067	1.37774	1	0.392861	0.755466	1.41602	1	0.413259	0.780234	1.32241	1	0.362564	0.750611	1.38156	1	0.424458	0.79701	0.951286	1	0.835516	0.962552	0.945082	1	0.851515
72	EJK46971.1	812	24106	DHAEANIVVMLVGNK;ILTEIYR;AITSAYYR;VVLIGDSGVGK;STIGVEFATK;GAVGALLVYDISK	1;1;1;1;0;1	5	10	48983;311442;313424;71102;80608;201218;201220;203571;203572;203579;261638;261640;261641	ACI64969.1;XP_002296252.1	hypothetical protein THAOC_34340 [Thalassiosira oceanica]	0.970886	9	0.546345	0.820763	0.947066	10	0.482352	0.773628	1.10404	8	0.10259	0.33964	1.03056	10	0.718228	0.905182	0.856863	10	0.0482952	0.242341	0.815443	9	0.010399	0.0817386	0.968422	10	0.676232	0.921437	0.952192	9	0.481152	0.826921	1.17636	9	0.00869913	0.114295	1.08899	10	0.20008
73	XP_002289867.1	158	55394.8	SGFFADGAK;AIIVMSESGNTAR;NEVDYIAASFVR;DIDDIVNWGIK;NMNLPGVVVDLPTLTEK	1;1;1;1;0	4	14	158555;158556;158560;205258;205259;205270;205286;210116;210117;210120;210121;210127;257802;257818;335153	EED93404.1	pyruvate kinase [Thalassiosira pseudonana CCMP1335]	0.995522	14	0.948205	0.984222	1.21271	14	0.0114988	0.103089	0.840624	14	0.165883	0.456666	1.05223	14	0.629537	0.885578	1.02249	14	0.807119	0.95334	0.932829	14	0.458054	0.812399	0.904554	14	0.255274	0.677315	0.830611	14	0.0335966	0.193124	0.88961	14	0.0451955	0.297992	0.831805	14	0.0141986
74	EED96238.1	1315	140900	LHPVAAMTPER;GVYEMIITK;SAVVCAPTSSGK;GIAIYTNEVGFSCYR	1;1;1;1	4	5	164338;203772;203773;230574;287343	XP_002286597.1	predicted protein [Thalassiosira pseudonana CCMP1335]	0.996266	5	0.964004	0.98641	0.974925	5	0.765923	0.913546	1.15895	5	0.283272	0.603754	1.12737	5	0.446955	0.787157	0.708255	5	0.137086	0.455015	0.666347	5	0.0452955	0.227743	0.846537	5	0.29887	0.712538	0.883822	4	0.252575	0.631437	1.16995	5	0.0440956	0.296164	0.972379	4	0.749725
75	EED95591.1	1759	133008	IWHGQVTK;SPSTTGAGSEGALTK;VDHDISLLIPEVWCR;LFQRPDDAIYPGFDK	1;1;1;1	4	6	180747;272734;272735;303729;303733;330149	XP_002285950.1	predicted protein [Thalassiosira pseudonana CCMP1335]	0.817672	5	0.229777	0.531988	0.863458	6	0.20028	0.574348	0.860109	6	0.505249	0.786477	0.973348	5	0.743226	0.913606	0.998891	6	0.993301	0.997683	1.04804	6	0.824318	0.955539	1.27849	6	0.0773923	0.378499	1.38728	6	0.079992	0.347447	1.23583	6	0.0485951	0.314645	0.835724	6	0.314369
76	EED87082.1	575	123138	RLEASTFLR;VFFHLEEPR;LLLESFNPHVR;MGAILSTGLIDAGGR	1;1;1;1	4	9	123666;123667;123673;149176;149177;149178;149179;195193;221936	XP_002296386.1	26S proteasome regulatory subunit Rpn2 26S subunit, non-atpase [Thalassiosira pseudonana CCMP1335]	0.980199	9	0.849915	0.958415	0.81292	9	0.0190981	0.142675	0.992102	9	0.970103	0.985131	0.811419	9	0.0187981	0.123629	0.927357	9	0.325067	0.700638	0.765912	9	0.00769923	0.066628	0.902889	8	0.0468953	0.274648	0.856656	8	0.0129987	0.0995645	0.961618	8	0.60034	0.893068	1.21195	9	0.170383
77	EED89203.1	1528	115709	LNVLANVMR;STPYASDLGK;LEQIAPFAFDK;FGLDGGEAIVPALK	1;1;1;1	4	6	105309;199838;199845;199846;256038;277179	XP_002293467.1	2-oxoglutarate dehydrogenase E1 component [Thalassiosira pseudonana CCMP1335]	1.07152	6	0.348065	0.665832	1.24818	4	0.0191981	0.142675	0.89632	6	0.252475	0.565077	0.995123	6	0.966603	0.989517	1.18568	6	0.020498	0.139681	1.06275	6	0.638036	0.896678	1.15458	5	0.0650935	0.342597	0.932817	6	0.588341	0.885224	0.867186	6	0.29527	0.698698	0.853534	5	0.0475952
78	XP_002293655.1	1459	106906	SAGASYFVVGR;GADTVYAFQTR;VMYDITDNVMK;GATLWMTGCSGAGK	1;1;1;1	4	6	130202;166441;266003;266008;266014;279029	EED89391.1	ATP sulfurylase [Thalassiosira pseudonana CCMP1335]	1.029	5	0.706229	0.889326	0.934247	6	0.288871	0.662272	0.992219	6	0.940306	0.970585	0.856942	6	0.225277	0.585786	1.11499	5	0.178382	0.517378	1.00852	6	0.907509	0.977859	0.996299	6	0.970803	0.993867	0.966762	6	0.710029	0.936167	0.946456	6	0.450155	0.819535	1.1768	6	0.108289
79	EED90182.1	1292	101765	NIDQVLLELK;ASMIWIIGEYAER;LVVLGDKPVIEDDTFR;LAPPLVTLLNSEPEIQYVALR	1;1;1;1	4	6	235608;246821;250382;333191;333193;347916	XP_002292207.1	beta subunit of tetrameric clathrin adaptor complex AP1 [Thalassiosira pseudonana CCMP1335]	0.685114	5	0.00559944	0.0436805	1.02386	6	0.755224	0.912141	0.616415	6	0.0273973	0.138602	1.02777	6	0.874713	0.962291	1.23525	6	0.123188	0.43032	0.958857	6	0.79862	0.949482	1.23619	4	0.0441956	0.263417	0.931602	4	0.49645	0.838967	1.0068	6	0.963004	0.987696	0.641009	6	0.00739926
80	XP_002289681.1	518	78618.1	GDSVLYATASR;LNLTVAGTK;EGITTFQLDIK;GETQVVATATLGDSGMR	1;1;1;1	4	6	138284;138285;164134;253377;253381;280479	EED93218.1	polyribonucleotide nucleotidyltransferase [Thalassiosira pseudonana CCMP1335]	1.36258	6	0.00419958	0.0358656	1.05683	6	0.442856	0.750421	1.1529	6	0.138286	0.407616	0.904385	6	0.179682	0.514765	0.868273	6	0.0454954	0.235032	1.00047	6	0.9958	0.99911	0.729327	5	0.00089991	0.016362	0.88236	6	0.283672	0.660321	0.884427	6	0.060094	0.355243	1.26376	6	0.0310969
81	EED94112.1	310	77429.1	LGMDMDVANELMR;VFDSDTINLLGYFPR;KLGMDMDVANELMR;LYDLVVIGGGPAGVAGAIK	1;1;1;1	4	6	236767;236769;288469;327778;313007;329081	XP_002288676.1	predicted protein [Thalassiosira pseudonana CCMP1335]	1.31773	6	0.0620938	0.244308	1.42985	5	0.00119988	0.0220631	1.2618	6	0.0464953	0.197962	1.30783	6	0.0382962	0.200492	1.46177	6	0.0670933	0.3048	1.96778	6	0.00789921	0.0680315	1.44458	6	0.00919908	0.09355	2.0262	6	0.0001	0.00260844	0.992447	6	0.951605	0.985468	0.966384	6	0.772723
82	XP_002294706.1	49	73642	DFVGGPTPLHK;DKDIVINMSGR;FGGQFIPETLSEAFR;LTEMCGGATIWLK	1;1;1;1	4	5	231503;249751;249752;278694;292740	EED88066.1	tryptophane synthase [Thalassiosira pseudonana CCMP1335]	1.12862	5	0.389761	0.70716	1.27681	5	0.00359964	0.047004	1.20965	4	0.154085	0.438399	1.235	5	0.0193981	0.12665	0.95039	3	0.688931	0.916029	0.854975	4	0.171083	0.519307	0.911847	5	0.20248	0.610492	0.787749	5	0.0212979	0.143045	0.983739	5	0.850415	0.965884	0.889701	5	0.372563
83	XP_002294103.1	1081	73290.7	YIVILPVSR;SAGVELGHVLLK;ELVDSLFLQTDK;IQNDWQGPQMVK	1;1;1;1	4	7	113898;113899;244338;244339;281051;281053;287074	EED88458.1	predicted protein [Thalassiosira pseudonana CCMP1335]	0.546409	7	0.00679932	0.0496048	0.479859	7	0.00479952	0.0576582	0.457309	7	0.00249975	0.0247365	0.388966	7	0.00139986	0.0186855	0.96271	7	0.684732	0.915848	0.793656	6	0.010199	0.0815918	0.847264	7	0.00789921	0.0831496	0.756046	7	0.0117988	0.0931486	0.890699	7	0.0669933	0.372185	1.24054	7	0.0193981
84	XP_002287300.1	624	70795.9	VGGGIYTK;DTSGPALNIVMK;TDALDAAGNTTAAIGK;EKTDALDAAGNTTAAIGK	1;1;1;1	4	5	125478;249271;252693;294452;348845	EED94743.1;EJK49356.1	vacuolar membrane proton pump, inorganic pyrophosphatase [Thalassiosira pseudonana CCMP1335]	1.08956	5	0.271273	0.584624	0.923546	5	0.673233	0.884231	0.615811	5	0.116288	0.368724	0.536195	5	0.146585	0.453222	1.95353	5	0.00359964	0.0402221	1.6228	3	0.0133987	0.096086	1.19033	3	0.163384	0.545957	1.12108	4	0.329167	0.717313	0.72018	4	0.0831917	0.41026	1.19262	5	0.265173
85	XP_002293997.1	1456	69699	AMTMEIR;NTVLATGGYGR;AAMGLSEAGFK;GSDWLGDQDAIHYMCR	1;1;1;1	4	5	57473;128646;210724;210725;312597	EED89006.1	succinate dehydrogenase flavoprotein subunit [Thalassiosira pseudonana CCMP1335]	1.16411	5	0.0777922	0.283143	1.0724	5	0.40376	0.720728	0.960438	5	0.686231	0.892178	0.897491	5	0.156984	0.472263	0.991311	3	0.948905	0.990535	0.813044	5	0.0391961	0.211871	0.827286	3	0.136086	0.52084	0.705134	5	0.00309969	0.0369499	0.864775	5	0.0330967	0.250311	1.18925	4	0.0712929
86	EJK49309.1	130	65064.7	LFLAGADVFR;GVNTPDSILEISCLTPK;IVELCDGIMVAR;YDHPIAILGDLQGPK	1;1;1;1	4	8	128690;128693;128694;196826;208210;208211;314767;314773	-	hypothetical protein THAOC_31830 [Thalassiosira oceanica]	1.87721	8	0.00089991	0.0113401	1.48603	8	0.00919908	0.0891223	2.28405	8	0.0001	0.00211861	1.982	7	0.0001	0.00261133	1.22296	8	0.170283	0.503315	1.60106	8	0.040496	0.215023	1.50177	8	0.00059994	0.0130107	2.04061	8	0.00079992	0.014256	1.26168	7	0.00019998	0.0079992	1.19192	8	0.0767923
87	XP_002296190.1	675	62850.4	MEIAELPR;SADGVVVPGGFGTR;SVGLSPTVIFCR;YTGLQDSYLSVIK	1;1;1;1	4	5	84667;193492;197992;197997;293977	ACI64907.1	CTP synthase [Thalassiosira pseudonana CCMP1335]	1.1085	5	0.574743	0.835905	1.04232	5	0.650835	0.876859	0.981816	5	0.919808	0.962565	0.942289	5	0.791021	0.932824	1.03683	3	0.776222	0.94737	0.755066	4	0.0489951	0.24162	1.06917	5	0.736026	0.934892	0.83143	3	0.215778	0.586026	0.922321	5	0.515048	0.860007	0.872934	4	0.145885
88	EED92802.1	5	60260.6	FVGMLHR;GVVDITTR;TPGQFMMR;LMWLVEK	1;1;1;1	4	4	59284;59552;91640;164706	XP_002289265.1;EJK78098.1	nitrite reductase-ferredoxin dependent, partial [Thalassiosira pseudonana CCMP1335]	0.805102	4	0.434857	0.737864	0.887507	3	0.248875	0.626611	0.781989	4	0.247575	0.561566	0.912149	4	0.338566	0.695663	0.55664	4	0.0889911	0.353028	0.544589	4	0.020098	0.131074	0.562565	4	0.10209	0.443666	0.539454	4	0.0305969	0.186062	1.07891	3	0.423458	0.791548	0.892836	4	0.562944
89	XP_002289212.1	532	60093.5	HPFPGPGLAIR;THHNVGGLPASMK;IIGGTFIDIFQEEANK;LCYDISSKPPATIEWE	1;1;1;1	4	9	145347;145354;145356;145362;269911;269912;269917;331329;340079	EED92749.1	GMP synthase [Thalassiosira pseudonana CCMP1335]	0.973968	5	0.727727	0.902522	0.973751	9	0.760224	0.913034	1.21185	9	0.174483	0.466879	1.1147	9	0.290671	0.656829	0.578242	9	0.0118988	0.0926431	0.554434	9	0.00139986	0.0195329	0.678249	7	0.00169983	0.0261512	0.717358	6	0.00229977	0.031843	1.14716	9	0.0815918	0.408959	1.08008	9	0.109589
90	EED91167.1	1515	59626.6	DVNFDMIR;WVGGVEIEHIAIATGGR;SLHDAMCVVR;HADTVAGVDQYAIR	1;1;1;1	4	5	99127;118535;153340;241681;241701	XP_002291060.1	t-complex chaperonin protein, epsilon subunit [Thalassiosira pseudonana CCMP1335]	0.909894	5	0.415058	0.722465	1.09405	5	0.447855	0.753747	0.943494	5	0.560844	0.828259	1.15509	5	0.0733927	0.300576	0.837192	5	0.187981	0.527915	0.823805	5	0.230577	0.600547	0.902897	5	0.161684	0.544656	0.896794	5	0.255874	0.634399	1.06331	5	0.506249	0.852476	0.846871	5	0.174583
91	EED90332.1	1002	57511.9	MNVLHPAAK;SGANVVLIQK;YLIAGGGAAETEASLR;IALIQFCLSAPK	1;1;1;1	4	4	184497;197396;255256;272164	XP_002292357.1	t-complex protein 1 delta subunit [Thalassiosira pseudonana CCMP1335]	1.04397	3	0.742226	0.907131	1.09406	4	0.573743	0.839873	1.08774	4	0.50285	0.785557	1.2068	4	0.342866	0.697726	0.826645	3	0.180282	0.518095	0.702937	4	0.186981	0.541103	1.0546	4	0.694831	0.926116	0.795697	4	0.355964	0.738797	1.10057	4	0.192081	0.590977	0.925558	4	0.628737
92	XP_002287467.1	662	54228.2	VAPLVFAGEVR;GIGNPLGVK;AFSTGGFADISR;AVVWISDPVHGNTR	1;1;1;1	4	9	144171;144490;144493;144494;144495;166426;166427;166453;249451	EED94910.1	2-dehydro-3-deoxyphosphoheptonate aldolase-like protein [Thalassiosira pseudonana CCMP1335]	0.782258	9	0.0607939	0.241698	0.881623	9	0.0642936	0.311092	0.820999	9	0.252575	0.565077	0.923155	9	0.560444	0.852183	0.663507	9	0.00219978	0.0288862	0.671862	9	0.00219978	0.0276895	0.688316	8	0.0001	0.0036731	0.739431	9	0.00519948	0.0540986	1.14684	8	0.0282972	0.231289	0.966654	8	0.567643
93	EED87898.1	1620	52559.7	VIPGYGHAVLR;ALGLPLERPK;AVGGLCQLYWDR;NVYFDGVVTK	1;1;1;1	4	20	151748;151753;151756;213829;213830;213832;213833;213835;213836;223293;223294;223295;286041;225335;225336;225347;225350;225351;225352;287536	XP_002294538.1	precursor of synthase [Thalassiosira pseudonana CCMP1335]	1.17582	20	0.00419958	0.0358656	0.961974	20	0.380262	0.705205	1.18426	19	0.0019998	0.0208187	0.980856	19	0.729027	0.907127	0.879274	19	0.00229977	0.0293425	0.915754	19	0.0118988	0.0877781	0.975367	19	0.481052	0.845301	1.0451	16	0.154185	0.481928	1.08286	20	0.0236976	0.213279	1.23473	20	0.00069993
94	EED87497.1	1179	51266.8	GFTYGGEMVR;EGLLLVAAGPSVVR;ALGGGVPIGAMMAK;AFFCNSGAESNEAAIK	1;1;1;1	4	11	131028;131031;135930;209501;209502;209503;209504;255013;323576;323583;323584	XP_002295193.1	n-acetylornithine aminotransferase [Thalassiosira pseudonana CCMP1335]	1.10476	11	0.29837	0.613969	0.964208	11	0.434957	0.742909	1.2176	11	0.122688	0.379967	1.00913	10	0.79632	0.935443	0.911346	11	0.325367	0.700638	1.34182	11	0.00129987	0.0187181	0.975671	8	0.569443	0.88591	1.56899	11	0.00029997	0.00642793	1.1218	11	0.0623938	0.359391	1.15314	11	0.191781
95	EED96067.1	752	51073.9	ITLSGPCTSQIR;IAENMPGYTPYR;LALNEDLVIGK;KFPGCTEQTMR	1;1;1;1	4	5	197263;217049;235622;270974;270978	XP_002286426.1	mu subunit of AP4-like protein [Thalassiosira pseudonana CCMP1335]	1.02717	5	0.852415	0.959809	0.975049	4	0.729327	0.902269	0.977926	5	0.925107	0.963631	1.01539	5	0.922308	0.97334	0.963797	5	0.840716	0.961765	0.775141	5	0.175882	0.524179	0.955642	5	0.522248	0.865197	0.851641	4	0.152585	0.480162	0.979091	5	0.872513	0.969441	1.16748	4	0.176282
96	EED93255.1	182	50421.7	CDIYLAAVGR;NLGSDVTLIIR;DIAATLVADLVR;IGLDKDIAATLVADLVR	1;1;1;1	4	5	137684;157812;157813;175511;330235	XP_002289718.1	probable SOLUBLE pyridine nucleotide transhydrogenase [Thalassiosira pseudonana CCMP1335]	1.77746	5	0.00589941	0.044667	1.36464	5	0.00949905	0.0905677	1.60555	5	0.0234976	0.124836	1.10947	4	0.284472	0.652044	1.51748	5	0.00039996	0.00827044	1.67312	5	0.00059994	0.0104844	1.42309	5	0.00729927	0.0772864	1.44843	4	0.00869913	0.0763826	0.932743	5	0.606539	0.893901	1.27358	5	0.049695
97	EED88845.1	393	50303.8	VMFEATGR;FEIPYFTVSGIQVR;TISFIPPDGEFDLMTYR;SVANNVEISIPVPPDVDSPSFK	1;1;1;1	4	5	71780;270531;270532;321627;359353	XP_002293836.1	mu subunit of tetrameric clathrin adaptor complex AP1 [Thalassiosira pseudonana CCMP1335]	1.05946	5	0.722628	0.901779	1.29729	4	0.010399	0.0970929	0.785213	5	0.0591941	0.235217	0.959403	4	0.667533	0.892374	1.5021	3	0.0154985	0.11474	1.45432	3	0.0407959	0.215242	1.08479	5	0.318968	0.728242	1.08635	5	0.345165	0.730714	0.74827	4	0.00319968	0.058176	0.889171	5	0.331767
98	XP_002289813.1	932	50255	QGVDVIVGTPGR;TIVFTETK;LPSMIVLCPTR;AGAFNVLVATDVAAR	1;1;1;1	4	5	156724;170977;170986;184911;232175	EED93350.1	RNA helicase, partial [Thalassiosira pseudonana CCMP1335]	0.891801	4	0.268973	0.58186	1.03049	5	0.620138	0.859509	0.752917	3	0.125087	0.384441	0.820203	5	0.0251975	0.150351	1.01768	5	0.885511	0.978479	1.07148	5	0.515948	0.851244	0.838418	5	0.273773	0.694578	0.887413	5	0.442256	0.810652	0.829403	5	0.0221978	0.207026	0.957102	5	0.516048
99	XP_002289802.1	1412	50017.1	VATAAIEVLR;GLLNAIVIDQPK;YNVLLIADEVQTGLGR;ILPMNTGVEGGETAIK	1;1;1;1	4	5	109084;256515;289070;289072;313888	EED93339.1	hypothetical protein THAPSDRAFT_27892 [Thalassiosira pseudonana CCMP1335]	1.0754	5	0.524448	0.809745	0.88569	5	0.318468	0.680475	1.29644	5	0.136286	0.403704	1.06172	5	0.70203	0.903334	0.769862	4	0.029797	0.178683	1.10478	5	0.306669	0.68851	0.974604	3	0.826917	0.960291	1.56215	4	0.00289971	0.0352667	1.22283	5	0.0344966	0.256101	1.1881	4	0.0722928
100	EJK66959.1	1640	48489	LDQCFADLK;AQAYISEK;MNIDTDTQWSYWEGIK	1;1;1;1	4	4	217632;217641;242245;345287;345289;345291;346244	-	class II fructose-bisphosphate aldolase [Thalassiosira oceanica]	1.27737	7	0.00589941	0.044667	0.896541	7	0.0632937	0.308257	1.8631	6	0.00289971	0.0273423	1.5127	7	0.00929907	0.0741457	0.507167	7	0.00919908	0.0776955	0.706805	5	0.0121988	0.0892594	0.899878	5	0.150985	0.529772	1.28709	7	0.00629937	0.0626457	1.65995	7	0.00889911	0.116075	1.32339	6	0.00069993
101	EED88727.1	1095	48331.3	WDPFYADAR;HQLETFK;SFECFVDACR;GAGVVALTMFDLR	1;1;1;1	4	7	138577;138580;159639;185942;201666;201668;205615	XP_002293718.1	predicted protein [Thalassiosira pseudonana CCMP1335]	1.58209	7	0.00719928	0.0512771	1.57546	6	0.0009999	0.0191683	1.15993	7	0.39536	0.707797	1.10946	7	0.276172	0.639669	1.26635	7	0.0290971	0.176248	1.18139	7	0.254475	0.636686	0.991221	7	0.951805	0.991148	0.913764	7	0.512649	0.846576	0.756096	6	0.00049995	0.0157879	0.910286	6	0.484252
102	XP_002288279.1	1569	47731.4	GYGGGVI;LPFFGCPTAGNR;MFHWEGETAAAK;QLETSPATIDVLPSIR	1;1;1;1	4	10	17617;17620;198171;198172;275362;285752;285758;285769;285770;285773	EED93715.1	l-lactate dehydrogenase [Thalassiosira pseudonana CCMP1335]	0.873466	10	0.219478	0.514605	0.859213	10	0.0538946	0.284804	0.774814	10	0.0423958	0.184878	0.764785	10	0.0176982	0.118558	1.0379	10	0.715728	0.928461	1.08875	10	0.332667	0.71437	0.963513	10	0.682932	0.923845	1.0205	10	0.816318	0.959826	0.979467	9	0.506649	0.852476	1.00439	9	0.915108
103	EJK65694.1	1385	44619.9	MLGGTLVTK;EFYFAIFMDR;ALYNLFVDK;AILVNIFGGIMK	1;1;1;1	4	7	165050;202888;202891;211097;211101;211102;255525	-	hypothetical protein THAOC_13425 [Thalassiosira oceanica]	1.25559	7	0.10439	0.337115	1.10569	6	0.0554945	0.289745	1.22502	7	0.147585	0.427191	1.03143	7	0.856914	0.953774	0.872554	7	0.124588	0.430752	0.825119	7	0.159184	0.501806	0.873222	7	0.340066	0.741202	0.954908	6	0.638936	0.906968	0.987285	7	0.931207	0.983092	1.18789	7	0.140386
104	EED92819.1	1287	44150.2	VVVVGMPK;MLIIHEVMGR;DAFGHVSLAK;EGETPLEVAAQQLIK	1;1;1;1	4	32	136143;136144;136145;141244;157078;157079;157084;157085;157086;157089;157090;157091;157092;162116;162117;162126;162129;162132;162134;162135;167009;167021;201391;313431;313436;313437;313438;313439;313440;313441;313443;313444	XP_002289282.1	phosphofructokinase [Thalassiosira pseudonana CCMP1335]	0.99846	30	0.974503	0.989326	1.04265	31	0.421058	0.730786	1.2947	31	0.0001	0.00211861	1.28674	30	0.0001	0.00261133	0.589466	32	0.0001	0.0035271	0.747563	32	0.0001	0.00239976	0.718746	30	0.0001	0.0036731	0.993178	29	0.871213	0.969879	1.23123	32	0.0001	0.0049995	0.983055	29	0.721128
105	EED93025.1	1163	39995.4	VGELFGGSMR;MAPTDMKPTR;SGSCPHGGWGMGFDR;DVVPFPVYYGHCPY	1;1;1;1	4	13	111653;111654;116406;226753;230520;230521;230522;230526;230532;264195;281115;323225;323230	XP_002289488.1	predicted protein [Thalassiosira pseudonana CCMP1335]	1.06273	11	0.178582	0.461604	0.919018	13	0.0938906	0.393314	0.9796	13	0.844616	0.939443	0.858284	13	0.049995	0.238968	0.806239	11	0.00039996	0.00827044	0.760938	12	0.00149985	0.0206086	0.787012	12	0.00039996	0.00959904	0.618862	10	0.0001	0.00260844	1.01201	12	0.788521	0.945559	1.144	13	0.0737926
106	XP_002287502.1	230	38981.7	SLMECLYK;TTLVNYILK;IDSIVCLADCK;IHNLELVQSVGIK	1;1;1;1	4	7	201073;201098;206514;206515;206516;259047;288124	EED94945.1	hypothetical protein THAPSDRAFT_39666 [Thalassiosira pseudonana CCMP1335]	1.19506	7	0.0208979	0.116588	1.08516	7	0.288871	0.662272	1.27074	7	0.0822918	0.288131	1.1075	6	0.113289	0.388111	0.97171	7	0.79762	0.95303	0.841076	7	0.174183	0.524179	1.057	7	0.721528	0.93402	0.928357	7	0.660234	0.916285	1.07527	7	0.40346	0.780438	1.01617	6	0.80092
107	XP_002292230.1	712	38236.9	NEVAMVLR;LIAPPIYVLSTMTLEK;YPEIESLVMVNVR;AVSLKEETELQAMMER	1;1;1;1	4	7	77134;190127;332207;332209;249073;252435;337044	EED90205.1	eukaryotic translation initiation factor 2 alpha subunit [Thalassiosira pseudonana CCMP1335]	0.969722	6	0.687831	0.884845	0.881374	6	0.0911909	0.386649	0.802653	7	0.0235976	0.124998	0.930452	7	0.347465	0.699589	1.11887	7	0.333167	0.704801	0.936024	7	0.633137	0.896678	0.994262	6	0.926207	0.984439	0.892849	7	0.205979	0.573049	0.990187	5	0.860614	0.966982	0.900977	7	0.393661
108	EED95871.1	1559	37624.1	YISDLTK;TGAAGAVAMK;GGYVSATPTFTVK;GVTIIASGSDQPTK	1;1;1;1	4	7	139857;139859;151378;156356;265851;274722;274739	XP_002286230.1	ornithine cyclodeaminase, partial [Thalassiosira pseudonana CCMP1335]	1.62642	6	0.00069993	0.0095551	0.865841	5	0.0356964	0.217065	1.57815	6	0.00269973	0.0260011	0.838632	7	0.0473953	0.230071	0.7767	7	0.0117988	0.0926431	1.00382	7	0.964504	0.989491	0.788446	7	0.00959904	0.0959904	1.03133	7	0.692631	0.932035	1.04569	6	0.338866	0.731498	1.77895	6	0.0001
109	EED91544.1	1130	37612.7	GPAILQVHTYR;AEQDPIKK;GFENACNQQYMQGK;STYFQGGWALVSEQLPYAAGAAK	1;1;1;1	4	7	174895;174896;174901;174902;246560;319135;361958	XP_002291437.1	predicted protein, partial [Thalassiosira pseudonana CCMP1335]	1.12708	7	0.168183	0.4522	0.9997	7	0.9966	0.9986	1.45	7	0.00889911	0.0616435	1.19729	6	0.0326967	0.178005	0.880398	7	0.271073	0.634974	0.809391	7	0.184582	0.536748	1.25373	6	0.00649935	0.0713343	1.08436	7	0.518748	0.851346	1.26805	7	0.0108989	0.131665	1.11328	7	0.280872
110	XP_002297525.1	354	36690.4	LALIEAAK;QIVLQALTK;LAFVEILNVENDFSK;GWISSEIISLCEQLAGQSAK	1;1;1;1	4	5	136154;193413;193414;325935;354639	ABK20782.1;EED86165.1;YP_874559.1	predicted protein [Thalassiosira pseudonana CCMP1335]	0.679233	5	0.00149985	0.0169983	0.999512	5	0.9951	0.9986	0.567193	5	0.00439956	0.0370262	0.852522	5	0.305069	0.668778	1.34021	5	0.0437956	0.231578	1.13924	5	0.260074	0.640232	1.17187	5	0.176982	0.567858	0.901477	4	0.328367	0.717313	0.887832	5	0.254775	0.655134	0.743316	3	0.0308969
111	EED91898.1	720	34898.2	TGEIRPVK;GDIFFNYGCLPR;KGDIFFNYGCLPR;IPDGKPPNVFGLDEK	1;1;1;1	4	5	158737;228258;308568;308576;341648	XP_002290146.1	predicted protein [Thalassiosira pseudonana CCMP1335]	1.03609	5	0.820118	0.94922	0.817135	4	0.10469	0.417368	1.16054	5	0.505049	0.786477	0.961603	4	0.684032	0.894917	0.701771	5	0.0641936	0.299648	0.890897	5	0.409259	0.777454	0.819185	5	0.158284	0.538931	0.995304	4	0.960904	0.99455	1.12516	3	0.229877	0.631563	1.08498	5	0.706729
112	EED93041.1	629	34888.2	MLDMLQQTGR;HYYSIVIDYR;AVALVVDPIQSVK;LINPQLMMMGQEPR	1;1;1;1	4	9	154916;160083;165124;196109;196110;267994;267995;267996;270848	XP_002289504.1	26S proteasome regulatory subunit [Thalassiosira pseudonana CCMP1335]	0.809079	7	0.00339966	0.0320743	0.985158	9	0.861514	0.948929	0.789516	8	0.132387	0.397918	1.2225	6	0.00939906	0.0746128	0.952391	9	0.682232	0.915848	0.888106	9	0.388561	0.763108	1.13311	9	0.293871	0.708604	1.07673	9	0.537746	0.861159	1.16437	9	0.0267973	0.225398	0.818982	7	0.0733927
113	XP_002287097.1	965	34302.5	YVEFNLVYDR;HDPEFYPK;IESILMSLPETAR;AGVNLSVVYGSMPQEALQAATER	1;1;1;1	4	13	193216;193218;263864;198212;228581;232435;232436;350591;350592;350602;351340;351342;351343	EED96738.1;EJK71933.1;EJK64385.1	coproporphyrinogen III oxidase, chloroplast targeted [Thalassiosira pseudonana CCMP1335]	0.757953	13	0.039996	0.183391	0.925493	13	0.243776	0.620232	0.731292	13	0.0645935	0.247374	0.899072	13	0.0737926	0.301254	0.924218	13	0.227377	0.576785	0.957439	13	0.616938	0.892676	0.919154	13	0.284272	0.702176	0.95163	13	0.640236	0.906968	1.00323	13	0.955005	0.985468	0.857869	13	0.255574
114	EED91332.1	1010	32211.5	TGLFLDPK;VPFLFTVK;SELNQLSYLQVK;QTYTLEGIEGSLK	1;1;1;1	4	29	155820;155831;155834;155835;175036;175038;175039;175041;175042;175043;283514;283519;283543;283544;283547;283548;286271;286272;286273;286274;286277;286278;286282;286283;286286;286289;286294;326480;326481	XP_002291225.1	oxygen-evolving enhancer protein 1 precursor [Thalassiosira pseudonana CCMP1335]	2.93859	26	0.0001	0.00219734	3.32675	29	0.0001	0.00353298	4.32918	26	0.0001	0.00211861	5.39123	29	0.0001	0.00261133	0.609553	27	0.0001	0.0035271	1.217	25	0.0001	0.00239976	1.0362	28	0.39636	0.785736	1.98259	29	0.0001	0.00260844	1.54626	29	0.0001	0.0049995	0.976803	27	0.820218
115	EED89850.1	1498	31772.5	TTVNYQYR;TLYADGGIPR;GVLPALIQGPLSR;IFLMPVDTVK	1;1;1;1	4	6	109457;114632;194238;194239;194240;230405	XP_002292654.1	predicted protein [Thalassiosira pseudonana CCMP1335]	0.606231	4	0.00149985	0.0169983	0.781728	4	0.0133987	0.113354	0.345631	6	0.00029997	0.00478094	0.488371	6	0.0009999	0.0146489	1.43907	6	0.0257974	0.160587	1.17229	6	0.225777	0.595021	0.927605	6	0.328967	0.729459	0.745963	6	0.0855914	0.354171	0.675773	6	0.020098	0.195464	0.766341	6	0.0578942
116	EJK64680.1	1063	31005.5	EIPSVTGTK;DLQMVNIK;VLPSIGNEVLK;SVVAQYNAEELLSK	1;1;1;1	4	23	168779;168784;168787;168788;168793;177981;177985;183101;231828;231834;231835;231836;231837;231838;304163;304179;304182;304183;304186;304187;304188;304189;304190	XP_002289569.1;EED93106.1	hypothetical protein THAOC_14563 [Thalassiosira oceanica]	0.811487	23	0.00209979	0.0226576	0.736416	23	0.0001	0.00353298	0.740439	23	0.0001	0.00211861	0.675188	23	0.0001	0.00261133	1.20814	23	0.00029997	0.00719528	0.928817	20	0.0629937	0.290353	1.15329	23	0.00669933	0.0730836	0.981392	23	0.781922	0.9518	0.947636	23	0.173183	0.564726	1.1395	21	0.00049995
117	XP_002286526.1	362	30685.4	LSSGYEILSR;CVLGSAGCK;GAVYSYDAIGSFER;FFPYYSFNVLAGIDSEGK	1;1;1;1	4	9	133514;133515;175156;246003;246004;246005;246006;301812;348985	EED96167.1;EJK60845.1	predicted protein [Thalassiosira pseudonana CCMP1335]	0.953953	6	0.450855	0.752231	0.948521	9	0.414459	0.727219	0.745025	9	0.0232977	0.124836	0.725758	8	0.00069993	0.0114661	1.19163	6	0.0183982	0.129797	0.896457	9	0.257574	0.640232	0.929824	9	0.39816	0.785842	0.7679	9	0.00949905	0.0802737	0.850452	9	0.0847915	0.413617	0.988896	9	0.90041
118	XP_002289747.1	190	30177.4	RYETFFGPGVGAEVVK;LTTGGPLSEEYLASK;YETFFGPGVGAEVVK;YGDEAHLDTTVK	1;1;1;1	4	11	63848;306162;306198;306201;306202;306207;310169;310170;310173;310186;316556	EED93284.1	predicted protein [Thalassiosira pseudonana CCMP1335]	0.753661	10	0.00029997	0.00505183	0.833404	11	0.00209979	0.0329028	0.67374	9	0.0001	0.00211861	0.748041	10	0.0001	0.00261133	1.07814	11	0.147285	0.47147	1.08566	10	0.193081	0.548746	1.06278	11	0.342666	0.741202	1.04162	9	0.357664	0.739995	0.933761	10	0.0911909	0.417668	0.896462	11	0.0736926
119	EED95034.1	584	29677.8	VLISFAPK;FGELFPGPSK;TWYYDLLK;EEMTGTNFYFSR	1;1;1;1	4	7	150852;150853;209928;215587;233731;233733;233734	XP_002287591.1	predicted protein [Thalassiosira pseudonana CCMP1335]	0.59521	7	0.00269973	0.0267303	0.966556	5	0.550745	0.827035	0.569538	6	0.00309969	0.0284824	0.962769	6	0.551845	0.847039	0.735722	7	0.0237976	0.153448	0.599257	6	0.00049995	0.00891	0.827902	7	0.223178	0.637651	0.739275	7	0.0134986	0.102521	1.05859	6	0.227077	0.627863	0.649767	7	0.00029997
120	EED94748.1	278	29407	FIVIVDESK;SGMVVGLGTGSTAYFAVER;EQAEELGIPLVTLDTHSK;TKEQAEELGIPLVTLDTHSK	1;1;1;1	4	16	202820;202821;202822;202824;202840;202841;202842;202845;202846;309862;309866;311853;311854;344900;363916;363917	XP_002287305.1	predicted protein [Thalassiosira pseudonana CCMP1335]	2.03631	14	0.0001	0.00219734	1.19354	16	0.00579942	0.0629552	1.57089	14	0.0001	0.00211861	0.91546	16	0.133987	0.429615	1.04712	14	0.248275	0.606766	1.46216	16	0.0001	0.00239976	0.901519	16	0.0162984	0.137733	1.13437	15	0.0143986	0.106656	0.824622	15	0.0001	0.0049995	1.50605	16	0.0001
121	EJK45719.1	416	26966.4	SFGDEGMLAYVR	1;1;1;1	4	12	200235;200236	XP_002295742.1;ACI64459.1	isocitrate lyase [Thalassiosira oceanica]	0.872349	2	0.69643	0.885651	0.961771	2	0.838816	0.941187	1.09945	2	0.778122	0.921018	1.21718	2	0.422058	0.764732	0.999501	2	0.9983	0.9983	1.36449	2	0.264174	0.640232	1.30224	2	0.220278	0.635417	1.82422	2	0.0363964	0.203458	1.27379	2	0.169083	0.557056	0.922455	2	0.709329
122	EED88836.1	1342	26552.6	SLTLLPR;LLLSPTGIMVK;VQWWFGDGAK;VVFVGGGDSMLLHEVLK	1;1;1;1	4	6	46302;46303;232532;237557;237560;331773	XP_002293827.1	hypothetical protein THAPSDRAFT_264237, partial [Thalassiosira pseudonana CCMP1335]	1.10005	6	0.354565	0.67379	1.23668	6	0.0109989	0.100609	1.06135	6	0.752825	0.913264	1.23515	4	0.0539946	0.252068	0.979912	6	0.89991	0.979117	0.739418	6	0.0485951	0.2408	0.982443	6	0.877012	0.978638	0.747961	6	0.0161984	0.116164	0.990961	6	0.928507	0.983092	0.890471	6	0.136986
123	AIR75421.1	177	25765	TFLFVGTK;MFPYIYTER;LPDVAIIIDQK;NNIHILDLVQTAQLLK	1;1;1;1	4	14	162764;162765;163541;163542;168477;168478;168483;244763;244765;244766;244767;334650;334651;334652	AIR75562.1;sp|A0T0Q8.1|RR2_THAPS;EED86156.1;ABK20743.1;YP_874520.1;XP_002297516.1	ribosomal protein S2 (chloroplast) [Cyclotella sp. L04_2]	0.603173	14	0.0001	0.00219734	0.921267	14	0.316468	0.680475	0.718688	12	0.00179982	0.018956	1.12128	12	0.0715928	0.298089	0.613276	14	0.00019998	0.00553483	0.702125	14	0.00029997	0.00574411	0.670226	12	0.00069993	0.0143167	0.773085	10	0.0001	0.00260844	1.13279	12	0.0491951	0.315129	0.693138	14	0.00069993
124	XP_002290043.1	521	22256.6	MAIPTMSQKFPEYALLLTQIHKVHLFDVNVPGGIQFKKVHLFDVNVPGGIQFK	1;1;1;1	4	6	159713;159718	XP_002290043.1	nitrilase [Thalassiosira pseudonana CCMP1335]	0.041	1	0.636337	100	0.176247	2	0.330397	0.728926	0.781445	1	0.924107	0.691178	1.34801	1	0.963911	0.791105	1.2847	1	0.422853	0.00827155	0.780672	1	0.451113	0.123347	1.14076	1	0.655391	0.915309	1.48711	1	0.333315	0.725124	1.29037	1	0.00313329	0.91111	0.75771	1	0.115263
125	EED95251.1	658	21809.3	DGFQWLSQFLS;ILFLGLDNAGK;YALGLLDTYGK;VQAHVPTLHPNTDELIVGQLK	1;1;1;1	4	6	195926;229919;242223;242224;242225;359315	XP_002287808.1	arf-type small G protein [Thalassiosira pseudonana CCMP1335]	1.04255	5	0.635136	0.867604	0.990493	5	0.865813	0.949593	0.978865	4	0.865213	0.945649	0.991688	6	0.892711	0.970516	0.751967	5	0.00529947	0.0515338	0.854575	5	0.116588	0.419599	0.792754	6	0.00319968	0.041735	0.874967	6	0.10139	0.380212	1.09774	6	0.207579	0.61383	1.03013	6	0.730327
126	EED89932.1	652	21722.1	GAAGALLVYDITR;SCLLLQFTDK;HGLIFMETSAK;LQIWDTAGQESFR	1;1;1;1	4	6	193865;193866;244693;246718;249398;249399	XP_002292736.1	predicted protein, partial [Thalassiosira pseudonana CCMP1335]	1.12889	6	0.30257	0.617475	1.03093	6	0.556244	0.828124	0.970304	5	0.774623	0.921018	0.930155	5	0.332667	0.692497	1.05197	5	0.686331	0.915957	1.02105	5	0.809919	0.950999	0.96415	5	0.606039	0.902141	0.943355	5	0.473053	0.824293	1.00627	6	0.959904	0.987696	1.09889	6	0.218778
127	ABK20727.1	326	19998	DFLGSILQER;ALINETIQK;QQIISLVLK;QLSQAHVVISEIR	1;1;1;1	4	12	150402;150403;197591;197595;197596;197597;197598;197599;200710;233491;233493;233498	YP_874504.1;sp|A0T0P2.1|ATPF_THAPS;EED86188.1;XP_002297548.1	ATP synthase CF0 B chain subunit I (chloroplast) [Thalassiosira pseudonana]	0.495415	12	0.0001	0.00219734	0.68518	12	0.0019998	0.0324652	0.299653	12	0.00019998	0.00360164	0.419698	12	0.00039996	0.00750758	1.24957	11	0.00879912	0.0753791	1.79703	12	0.00049995	0.00891	0.908731	11	0.265773	0.684395	1.25122	11	0.0273973	0.17064	0.653688	12	0.00249975	0.0483823	0.755508	12	0.0001
128	XP_002295724.1	533	11358.4	TLYGFGG;VFLENVIR;ISGLIYEETR;DNIQGITKPAIR	1;1;1;1	4	19	30032;30033;93568;93571;93572;93577;151326;151329;151331;151332;151333;151338;151339;234599;265522;265532;265537;265539;265541	EED89470.1;XP_002295814.1;XP_002288196.1;ACI64441.1;EJK69577.1;EED88843.1;XP_002293009.1;XP_002293834.1;ACI64887.1;XP_002296170.1;ACI64531.1;EED93632.1;EJK72475.1;EJK63755.1	predicted protein [Thalassiosira pseudonana CCMP1335]	0.395663	19	0.0001	0.00219734	0.511094	19	0.0001	0.00353298	0.195022	19	0.0001	0.00211861	0.25425	19	0.0001	0.00261133	1.50447	17	0.0001	0.0035271	1.53407	19	0.00029997	0.00574411	0.856219	18	0.0242976	0.176353	0.86213	18	0.0405959	0.217478	0.624007	17	0.0001	0.0049995	0.817948	19	0.0001
129	AIR75477.1	348	9287.28	SLGLAY;CETACPTDFLSVR;IYDTCIGCTQCVR;ACPTDVLEMVPWDGCK	1;1;1;1	4	15	17751;17752;250555;268492;268493;337891;337892;337894;337895;337896;337897;337898;337899;337900;339025	AIR75660.1;YP_009093493.1;YP_004072656.1;AIR75618.1;ADB27609.1;AIR76208.1;YP_874576.1;YP_009093262.1;YP_874618.1;ABK20799.1;XP_002297559.1;YP_009093220.1;AIR75519.1;sp|O96804.3|PSAC_SKECO;AIR75935.1;YP_004072607.1;sp|A0T0W4.1|PSAC_THAPS;EED86144.1;ADB27560.1;AIR76166.1;ABK20841.1;YP_009093535.1;CAA10625.1;AIR75893.1	photosystem I subunit VII (chloroplast) [Cyclotella sp. L04_2]	0.977107	15	0.818918	0.948997	0.909142	14	0.0268973	0.179515	1.28872	13	0.0215978	0.118953	1.1306	14	0.229877	0.589756	0.646606	13	0.00029997	0.00719528	1.04606	15	0.650035	0.903421	0.810232	15	0.00079992	0.0153176	1.14636	15	0.134487	0.44912	1.13614	14	0.178882	0.571914	1.03198	15	0.658834
130	AAV67002.1	1382	15372.1	GGWWYKPEYIFNELNINSAMTAPDHNETIDLARNIAGTYEVGGYAYTGGGRRISRVEVTTDGGKHWEVSKIHQIERPTDYGMYWCWIWWSFDLKVADLVGCKEIWCRAWDESNNCQPTEPTWNLMGMGNNQ	1;1;1;0;1;1;1	6	10	182309;182310;182313;182314;182315;182316;182317;182318;182319;182320	XP_002287768.1;EJK77608.1	fucoxanthin chlorophyll a/c protein [Thalassiosira pseudonana CCMP1335]	0.522687	8	0.0001	0.00219734	0.671348	9	0.00019998	0.00621317	0.420685	8	0.0001	0.00211861	0.52454	8	0.0001	0.00261133	1.47309	10	0.00019998	0.00553483	1.55146	10	0.00109989	0.0164983	1.26698	8	0.00029997	0.00794038	1.4259	9	0.0069993	0.0652784	0.852515	8	0.00389961	0.0662198	0.855276	8	0.00259974
131	EJK47228.1	1281	158014	NLVQEFITK;ETANFEFPLITK;LIDSANAPIFGVDTQGR;LIDTANAPIFGVDTQGR;RNEQGNVIGVVGIGQDITAR;RDEQGNVIGVVGIGQDITAR	1;1;1;0;1;0	4	6	213302;213303;213304;281433;291131;293436;293439;331091;331167	-	hypothetical protein THAOC_34070, partial [Thalassiosira oceanica]	1.3076	6	0.0572943	0.232701	1.05609	6	0.248975	0.626611	1.2485	6	0.224678	0.530333	1.01795	6	0.866713	0.956266	1.22233	6	0.0907909	0.356622	1.10423	6	0.375162	0.753675	1.2075	6	0.0730927	0.367985	1.10955	6	0.253575	0.632181	0.983061	6	0.855414	0.966982	1.23211	6	0.10089
132	XP_002287000.1	931	76660.5	TQLFMER;LLDANSQK;MPFAAAQIGLGFR;ACYDLDVHGK;GLFDLGPPACALK	1;1;1;0;1	4	7	75309;75310;155060;208926;208998;233794;271769;271775	EED96641.1	glycyl tRNA synthetase [Thalassiosira pseudonana CCMP1335]	1.35774	6	0.00239976	0.0248527	1.20349	7	0.0320968	0.203656	1.16242	6	0.0817918	0.287148	1.05693	7	0.549245	0.847039	1.16874	5	0.0687931	0.307611	0.908005	6	0.180582	0.530257	0.989636	6	0.921608	0.984439	0.817318	6	0.0475952	0.243205	0.897721	7	0.0551945	0.336488	1.17357	6	0.0163984
133	XP_002294945.1	277	46028.7	TPLGWPK;FNALPYPADK;VLAEYVWVDAK;RPSSNADPYLVTGK;HQEHIAVYGEGNELR	1;1;1;0;1	4	14	126793;223907;223908;223909;223910;223921;258923;258925;258926;258927;258928;258931;297010;297013;297014;297015;297016;297017;327312;327313	EED87725.1	hypothetical protein THAPSDRAFT_26051 [Thalassiosira pseudonana CCMP1335]	0.753447	13	0.0001	0.00219734	0.860639	14	0.019898	0.144582	0.999247	14	0.988201	0.995943	1.1194	11	0.00269973	0.0304057	0.543958	13	0.0001	0.0035271	0.632947	14	0.00019998	0.0040905	0.737378	13	0.00019998	0.00571371	0.846833	14	0.00329967	0.0373548	1.28769	14	0.00069993	0.0203205	0.938777	14	0.193681
134	XP_002286781.1	219	42504.6	GTILPGVTR	1;1;1;0;1	4	4	72632	EED96422.1;EED96423.1;XP_002286782.1;EJK66011.1	THAPSDRAFT_260934 [Thalassiosira pseudonana CCMP1335]	0.961258	1	0.923508	0.981971	0.759037	1	0.326867	0.684106	1.2358	1	0.671633	0.884865	0.964676	1	0.923808	0.97334	0.771295	1	0.473053	0.80547	0.924994	1	0.853315	0.969064	1.02784	1	0.926807	0.984439	1.25388	1	0.575642	0.879475	1.29674	1	0.293071	0.697133	1.29604	1	0.39756
135	EJK78072.1	1051	53308.4	FTGTMQPGITLR;WMISEGYGDPR;VEPGCTVVSTSTR;VLEIEGLPDLK;MLVPDTVGTGGDSHTR;GGVSLRPGDGIIHSWLNR;IDEVFIGSCMTNIGHFR	1;1;1;0;0;0;0	3	10	44521;194379;194380;194383;198487;198488;198496;191402;212334;212337;245049;245057;245058;245059;245065;245066;267903;267904;270946;270948;270950;313875;313880;313881;313884;320952	-	hypothetical protein THAOC_00049 [Thalassiosira oceanica]	1.19642	10	0.0365963	0.173107	1.23376	10	0.0143986	0.117404	0.960315	9	0.519948	0.796959	0.965112	10	0.584642	0.862868	1.17654	10	0.182782	0.522773	1.121	10	0.317368	0.701797	0.944921	10	0.469353	0.83813	0.906448	10	0.191981	0.551141	0.805241	10	0.00479952	0.0764525	0.972106	10	0.693331
136	EED96246.1	1275	102764	APEVTFTFER;MMSPGDVPPLR;SVLSGDTVVLLGR;KIDYGEAPK	1;1;1;0	3	7	156227;156231;157279;157283;162353;192853;192856;265318;265319	XP_002286605.1	predicted protein [Thalassiosira pseudonana CCMP1335]	1.03538	7	0.50065	0.791378	1.19298	6	0.00649935	0.0688931	0.852195	7	0.220878	0.526889	0.964417	7	0.739026	0.912248	0.849916	7	0.0450955	0.23447	0.979699	7	0.731827	0.935779	0.682943	6	0.00079992	0.0153176	0.766563	6	0.00459954	0.0495759	0.813132	6	0.00459954	0.0739212	0.913447	7	0.0705929
137	EED93297.1	1492	32540.7	FTGWVDVPLSPK	1;1;1;0	3	6	269439;269440;269441;269445;269446;269448	XP_002289760.1	phosphoglycerate mutase [Thalassiosira pseudonana CCMP1335]	1.38557	6	0.00719928	0.0512771	1.00124	6	0.984702	0.995041	2.21376	6	0.00029997	0.00478094	1.58072	6	0.00339966	0.0362496	0.613496	6	0.00659934	0.060265	0.636929	6	0.00349965	0.037948	0.997396	6	0.983502	0.994446	1.05527	6	0.421258	0.794826	1.68021	5	0.0001	0.0049995	1.28461	5	0.00649935
138	AIR75840.1	493	160156	VNESGFLETPFWR;ILPFDEMYGSEVSR;LVYEDIFTSIHIER	1;1;1	3	3	255734;267901;285004	YP_009093167.1	RNA polymerase beta subunit (chloroplast) [Roundia cardiophora]	0.98564	3	0.913609	0.979399	1.12873	3	0.240976	0.616452	0.909588	3	0.577942	0.837389	1.07466	3	0.580442	0.862868	1.12267	3	0.385461	0.751295	1.25477	3	0.159184	0.501806	1.0744	3	0.579342	0.889987	1.22243	3	0.183482	0.534704	0.962298	3	0.687731	0.916817	0.878398	3	0.275872
139	EJK63391.1	1232	150701	AFDQYVNFSEQR;SNPYFIVQQGK;YPESTDVAPLMEQCITFQPSVR	1;1;1	3	3	238856;256447;261904	-	hypothetical protein THAOC_15956 [Thalassiosira oceanica]	0.488181	3	0.0410959	0.187007	0.772881	2	0.181982	0.549299	0.783082	3	0.330767	0.662638	1.21773	3	0.675232	0.892606	0.874621	3	0.741826	0.938498	1.02107	3	0.89981	0.977859	1.25816	3	0.0862914	0.405075	1.05999	3	0.674733	0.922869	1.27815	3	0.20438	0.611102	0.736654	3	0.0660934
140	EJK60133.1	1717	145770	LASNEALNAFGDGR;GLYAPFESGQK;EAVPDIPFQMLLR	1;1;1	3	10	58208;222600;222606;238204;244678;244683;248225;248226;248227;248230	-	hypothetical protein THAOC_19570, partial [Thalassiosira oceanica]	1.49682	10	0.0001	0.00219734	1.31043	10	0.00489951	0.0577053	1.20252	9	0.0161984	0.0966003	1.13637	10	0.20488	0.555944	1.55341	10	0.0001	0.0035271	2.18788	10	0.0001	0.00239976	1.35209	10	0.00119988	0.0201849	1.86866	9	0.0001	0.00260844	0.873507	10	0.0352965	0.256101	1.11277	10	0.137386
141	EED94357.1	151	125130	GWFEMMIAR;ALQDKPDFAAK;GLSCQAYDAANDVYFTK	1;1;1	3	9	148675;148677;297509;297510;297511;341112;341114;341115;341117	XP_002288921.1	probable isoleucine-trna synthetase [Thalassiosira pseudonana CCMP1335]	1.07192	9	0.575942	0.8363	0.918694	8	0.360464	0.694276	0.944051	9	0.693131	0.892178	0.870289	9	0.181382	0.517453	0.846416	8	0.211179	0.558373	0.881042	9	0.344566	0.724554	0.860332	9	0.214979	0.631258	0.81248	9	0.108189	0.39743	1.01581	7	0.740226	0.926988	1.05331	8	0.233677
142	XP_002295475.1	952	112917	LGSSVDWSR;QQYNIANK;ILHPMMPFVTEELWQR	1;1;1	3	3	98273;183740;324367	ACI64192.1	valyl-tRNA synthetase [Thalassiosira pseudonana CCMP1335]	0.949766	3	0.69593	0.885651	1.00153	3	0.993901	0.9986	0.83286	3	0.419558	0.725167	0.887824	3	0.49725	0.8109	0.681188	3	0.0944906	0.364782	0.636426	3	0.0177982	0.118217	0.632773	3	0.00269973	0.037965	0.582086	3	0.00589941	0.0593237	0.926868	3	0.578142	0.884074	0.957234	3	0.878312
143	EED96631.1	721	102900	DVLASLVEGR;RPGEETTLWIQR;DEQSAQSWVLTLR	1;1;1	3	5	113535;113536;234796;234804;245530	XP_002286990.1	predicted protein [Thalassiosira pseudonana CCMP1335]	0.811377	4	0.0671933	0.258171	0.971365	5	0.813319	0.929588	0.758704	5	0.0656934	0.248559	0.817169	5	0.0226977	0.13912	1.12194	4	0.250275	0.608439	1.04718	5	0.590741	0.884637	1.0188	5	0.833017	0.960557	0.920146	5	0.408359	0.784468	0.872289	5	0.232677	0.631563	0.958099	5	0.611639
144	EJK44062.1	1032	102843	GLCTLYADYFR;SGYYDVTITKPR;ALFDYTIYPAALMHK	1;1;1	3	4	208865;279670;279672;329064	-	hypothetical protein THAOC_37432 [Thalassiosira oceanica]	1.1973	4	0.548845	0.820763	0.959742	3	0.719328	0.902269	1.05691	4	0.845315	0.939443	1.04016	4	0.854815	0.953774	1.17212	4	0.445355	0.786962	1.14556	4	0.686031	0.908651	1.0868	4	0.681232	0.923845	1.07512	4	0.833117	0.964379	0.936884	4	0.362264	0.754636	1.02048	4	0.846615
145	XP_002288245.1	723	102455	MIGATTLEEYR;TLDMGALVAGAK;ISDAALITAAQLSDR	1;1;1	3	3	183904;226576;248271	EED93681.1	member of the HSP104/clp superfamily [Thalassiosira pseudonana CCMP1335]	0.594754	3	0.00779922	0.0538475	0.948687	3	0.672333	0.884231	0.62215	3	0.029697	0.145338	0.994154	3	0.963904	0.989154	1.07266	3	0.586141	0.873627	0.914315	3	0.534147	0.856273	1.16218	3	0.217378	0.634167	1.00528	3	0.971903	0.995506	1.06753	3	0.711529	0.925659	0.662443	3	0.00569943
146	EED87074.1	1462	98805.6	YGGVLEAVR;FIELGFNR;VQTYLLEK	1;1;1	3	5	86172;95317;95318;95319;188284	XP_002296378.1	predicted protein, partial [Thalassiosira pseudonana CCMP1335]	0.688182	5	0.0163984	0.0972034	1.09369	5	0.535146	0.81508	0.433852	4	0.00049995	0.00714611	0.741057	4	0.0147985	0.106536	1.89506	4	0.00029997	0.00719528	1.29847	4	0.0640936	0.291335	1.22427	5	0.220078	0.635417	0.874331	5	0.174883	0.518597	0.821848	3	0.0679932	0.375423	0.655514	5	0.0235976
147	EED94448.1	83	98246.1	NPYVDCLNVLQAETLK;KLDATMK;REIASIWQTDEVSR	1;1;1	3	3	202543;221743;276900	XP_002289012.1;BAO52742.1	phosphoenolpyruvate carboxylase [Thalassiosira pseudonana CCMP1335]	0.879453	3	0.348765	0.666463	0.926537	3	0.672033	0.884231	0.901444	3	0.542246	0.817376	0.940324	3	0.723128	0.905414	0.931526	3	0.581342	0.869355	0.953034	3	0.813819	0.952454	0.976928	3	0.846915	0.966676	1.01378	3	0.949505	0.990212	1.03508	3	0.758024	0.931563	0.985694	3	0.90181
148	EED89924.1	1396	96526.4	LMIQANK;FYGADASSLMAR;AEAVVEETVMVDEEVEVEDDEEDATTTAEDAAAEEK	1;1;1	3	3	450;185388;370428	XP_002292728.1	heat shock protein, partial [Thalassiosira pseudonana CCMP1335]	1.14571	3	0.390161	0.70716	1.00693	3	0.943206	0.978972	1.14672	3	0.636136	0.865617	1.01212	3	0.948005	0.982349	1.10816	3	0.434657	0.781166	1.18417	3	0.541446	0.859515	1.14622	3	0.260174	0.681211	1.24658	3	0.354165	0.738698	1.02413	3	0.872013	0.969441	1.14159	3	0.265673
149	EJK56442.1	1282	95178.4	QPSLFSVVR;VETCPISGTVAR;SIILVDHEDSFVHTLGNYLR	1;1;1	3	3	106043;185707;347444	EED95355.1;XP_002287912.1	hypothetical protein THAOC_23657, partial [Thalassiosira oceanica]	1.08517	3	0.547245	0.820763	1.07424	3	0.469953	0.76764	0.920074	3	0.739326	0.908874	0.935942	3	0.610239	0.874126	1.06426	3	0.627037	0.898837	1.09261	3	0.537946	0.858903	0.941755	3	0.759224	0.943136	0.963703	3	0.825017	0.960564	0.898311	3	0.329467	0.727373	1.02113	3	0.917208
150	XP_002288407.1	905	88454.7	QPWHDIHSAVR	1;1;1	3	5	200538	EED93843.1	phospholipase, partial [Thalassiosira pseudonana CCMP1335]	0.812081	1	0.620538	0.860161	0.792851	1	0.411059	0.724959	1.27735	1	0.624238	0.860836	1.19732	1	0.608039	0.872362	0.859674	1	0.681532	0.915848	0.68856	1	0.383562	0.759528	1.34992	1	0.333567	0.734414	1.11372	1	0.788721	0.952178	1.48344	1	0.126287	0.487532	1.07106	1	0.818018
151	XP_002292920.1	1277	88438.1	ASPVQVVVTANAK;YWFEYTGPLQK;NLQEIDAMCATGLIAAR	1;1;1	3	9	257203;257205;257206;257207;285086;285089;305193;305195;305206	EED90116.1	predicted protein [Thalassiosira pseudonana CCMP1335]	1.0699	9	0.405159	0.716484	0.940608	8	0.255274	0.633615	1.07015	8	0.605439	0.847239	0.897151	7	0.0485951	0.23414	0.92021	8	0.0806919	0.339964	1.00412	9	0.962404	0.989491	0.97886	8	0.665633	0.91531	1.05117	8	0.583642	0.880599	1.09542	7	0.0871913	0.414097	1.0869	9	0.356264
152	YP_009093166.1	122	86059.5	FATSDLNELYR;LLEIDAPQLIIR;LGIQAFEPIIVQGR	1;1;1	3	4	196085;212792;247402;247407	YP_009093439.1;AIR76112.1;AIR75839.1	RNA polymerase beta (chloroplast) [Roundia cardiophora]	0.442025	4	0.00119988	0.0143191	0.778638	4	0.0825917	0.36388	0.409497	4	0.00049995	0.00714611	0.709548	4	0.00769923	0.0648318	0.901847	4	0.39576	0.75581	0.553695	3	0.00489951	0.0484567	0.86521	4	0.213879	0.630084	0.647672	3	0.0174982	0.124003	1.0849	3	0.391261	0.773351	0.659446	4	0.00139986
153	EJK58387.1	1594	85152.9	GLTTFQHWPIR;FTPETWGGFMK;DGTDEVMSLLAIK	1;1;1	3	6	203228;260473;260493;263611;278115;278118	-	hypothetical protein THAOC_21493 [Thalassiosira oceanica]	1.00972	4	0.915108	0.979399	1.03411	5	0.557444	0.828124	0.944781	4	0.651435	0.875029	0.992516	5	0.927707	0.974201	1.1003	5	0.229977	0.578641	1.06209	6	0.544246	0.859515	1.05977	6	0.322468	0.728242	0.912489	6	0.461854	0.822123	0.979993	5	0.719028	0.926988	1.06761	5	0.338266
154	XP_002289774.1	815	84327.2	VSGAIGPVTSLGK;MSFDQEAAAVLLAR;FLLPVSECAMTLESILDDLR	1;1;1	3	8	235824;235825;243032;243034;243035;246656;246659;347999	EED93311.1	hypothetical protein THAPSDRAFT_22248 [Thalassiosira pseudonana CCMP1335]	0.790413	8	0.0132987	0.0829211	0.890372	7	0.0192981	0.142675	0.644278	8	0.00889911	0.0616435	0.704579	8	0.00619938	0.0553034	1.34526	8	0.00559944	0.0538684	1.16727	7	0.113289	0.414471	1.23106	7	0.0127987	0.115188	0.937055	8	0.548345	0.869359	0.864975	8	0.0949905	0.427289	0.952694	8	0.564744
155	ADB27549.1	150	82157.9	FSQALAQDPATR;DFGYSFPCDGPGR;DKPVALSIVQAR	1;1;1	3	7	189896;232108;232109;232110;232111;259781;259784	AIR76081.1;EED86194.1;YP_009093136.1;ABK20714.1;sp|A0T0M9.1|PSAB_THAPS;AIR75533.1;XP_002297554.1;YP_009093408.1;YP_874491.1;AIR75809.1;YP_004072596.1;AIR75392.1	photosystem I P700 chlorophyll a apoprotein A2 (chloroplast) [Thalassiosira oceanica CCMP1005]	0.447146	7	0.0001	0.00219734	0.629859	7	0.00019998	0.00621317	0.312581	7	0.0001	0.00211861	0.441437	7	0.00029997	0.00607355	1.5486	7	0.00119988	0.0189349	1.42795	7	0.00929907	0.0760833	1.14702	7	0.0876912	0.405075	1.0645	7	0.441656	0.810378	0.824737	6	0.0512949	0.322835	0.755899	7	0.0079992
156	ACI64432.1	1244	80838.6	IPPYFALVIR;DTITSLGPFFIK;NINDDDSQVAGLEMK	1;1;1	3	4	153924;267982;267983;316016	XP_002295715.1	hypothetical protein THAPS_28865 [Thalassiosira pseudonana CCMP1335]	1.18812	4	0.415258	0.722465	1.12421	4	0.311069	0.679649	1.31001	4	0.117488	0.371518	1.06496	3	0.626037	0.885578	1.25254	3	0.124888	0.430752	1.08662	4	0.748825	0.940003	1.03625	4	0.690831	0.92522	1.20948	4	0.136186	0.450617	0.891918	3	0.242176	0.641998	1.03776	4	0.676732
157	XP_002293649.1	1639	80792.2	FLTDGMLLR;SISSAESVK;QMAELPLDPQLSK	1;1;1	3	4	115592;115593;161188;291182	EED89385.1	RNA helicase [Thalassiosira pseudonana CCMP1335]	0.853341	4	0.251975	0.558498	1.09002	4	0.430357	0.738575	0.508648	3	0.00749925	0.0551271	0.747577	4	0.240276	0.601357	1.15623	4	0.214779	0.564068	1.18444	3	0.265773	0.640284	0.813054	4	0.145785	0.523162	0.705707	4	0.0360964	0.20297	0.757217	4	0.0622938	0.359391	0.911876	3	0.478952
158	EED94363.1	1418	74032.9	AVAAELEWVR;LGDVVIDVSGVK;AGIVGVIGPNGAGK	1;1;1	3	3	139751;239288;241393	XP_002288927.1	ABC transporter [Thalassiosira pseudonana CCMP1335]	0.74495	3	0.069693	0.264393	0.905838	3	0.480552	0.772277	0.636645	3	0.0361964	0.168015	0.783754	3	0.130687	0.422797	1.06727	3	0.611439	0.89257	1.14024	3	0.371263	0.752965	0.956708	3	0.773323	0.952107	1.02979	3	0.857914	0.969879	0.902524	3	0.336466	0.730566	0.855022	3	0.322968
159	XP_002291125.1	218	70461.6	GSSAVGLTASVVR;TYVDAIHFR;IAEPTQCPTCHVR	1;1;1	3	4	28076;132658;132659;253199	EED91232.1	cdc21-like protein [Thalassiosira pseudonana CCMP1335]	0.711874	4	0.0888911	0.304528	0.82454	4	0.0336966	0.210627	0.868091	4	0.378262	0.695153	0.950312	4	0.59914	0.869984	0.965933	4	0.845415	0.962403	0.865411	4	0.370363	0.752965	1.16975	4	0.231777	0.649391	1.02866	4	0.809219	0.956398	1.22368	3	0.0618938	0.359391	0.947083	4	0.628837
160	XP_002294132.1	961	69922.2	GIDVISCR;MTAHELFLR;AYVSGFEAANSLLK	1;1;1	3	3	73998;131471;291176	EED88487.1	predicted protein [Thalassiosira pseudonana CCMP1335]	0.767637	3	0.0914909	0.309318	0.945607	3	0.573143	0.839677	0.731171	3	0.0994901	0.332151	0.906493	3	0.451955	0.787643	0.826318	3	0.20218	0.54695	1.10675	3	0.664534	0.903421	0.821537	3	0.29877	0.712538	1.11954	3	0.693331	0.932035	0.984383	3	0.866313	0.969441	0.839281	3	0.19828
161	XP_002289031.1	537	66824.7	EIGSVNTVIVK;VLIGDNTDWK;QNIIPHVDVLTDAAK	1;1;1	3	7	229316;229318;229322;229790;229826;314469;314470	EED94467.1	predicted protein [Thalassiosira pseudonana CCMP1335]	1.11034	7	0.390861	0.70716	1.00316	7	0.963704	0.986701	1.26746	7	0.0826917	0.28862	1.13509	5	0.105689	0.37016	0.796558	7	0.0214978	0.144849	0.821935	7	0.10449	0.39596	0.938545	7	0.549845	0.872208	0.9035	6	0.20188	0.567182	1.15093	7	0.232877	0.631563	1.11041	7	0.243676
162	XP_002293738.1	1582	66710.9	SGLMVADEIIAR;EFDAVVCALDVPGIK;DLDDITFTEWFTQLGGSR	1;1;1	3	8	181173;181177;181178;181208;314260;314261;331455;331460	EED88747.1	predicted protein [Thalassiosira pseudonana CCMP1335]	0.797247	7	0.0378962	0.17555	1.18559	8	0.069793	0.329785	1.02439	8	0.80482	0.929154	1.53161	7	0.0001	0.00261133	0.97201	8	0.711929	0.927785	1.2137	8	0.00519948	0.0505895	1.16827	6	0.0227977	0.16957	1.49862	8	0.00029997	0.00642793	1.20679	7	0.0009999	0.0264679	0.740034	8	0.00489951
163	EED88813.1	1075	65451.9	APTGAEVEWVK;KNEVVSFVK;KEDSYFFK	1;1;1	3	3	235965;270926;273583	XP_002293804.1	methionyl-trna synthetase [Thalassiosira pseudonana CCMP1335]	1.33183	3	0.271873	0.584624	1.04397	3	0.845515	0.945173	1.67688	3	0.0886911	0.303674	1.3159	3	0.234677	0.595616	0.829917	3	0.188981	0.527915	0.886152	3	0.50145	0.84249	1.08317	3	0.50225	0.86018	1.17545	3	0.269273	0.652344	1.27101	3	0.0345965	0.256101	1.27624	3	0.0614939
164	XP_002287277.1	347	64107.9	HLLLHGPPGTGK;NALNAFLYR;KGLLLFVDEADAFLQSR	1;1;1	3	3	16602;120461;341086	EED94720.1	hypothetical protein THAPSDRAFT_21258 [Thalassiosira pseudonana CCMP1335]	0.784773	3	0.469253	0.76749	0.797738	3	0.059994	0.3008	0.609789	3	0.174783	0.466879	0.630401	3	0.00669933	0.0588887	1.16069	3	0.272973	0.638593	1.06101	3	0.70433	0.920692	0.959096	3	0.763924	0.945555	0.877337	3	0.40276	0.780179	0.845705	3	0.108589	0.459672	1.00985	3	0.961804
165	EED91592.1	1756	63053.2	NAPCIVFLDEIDAVGR;TPGFSGAELENLMNEAALSAAR;RTPGFSGAELENLMNEAALSAAR	1;1;1	3	5	293566;342646;342656;342657;351251	XP_002291485.1	chloroplast ftsH, partial [Thalassiosira pseudonana CCMP1335]	0.788433	4	0.0441956	0.198111	1.15133	5	0.330567	0.685302	0.62012	5	0.00289971	0.0273423	0.959271	4	0.747925	0.913606	0.897348	4	0.277272	0.643629	0.938371	4	0.565343	0.866211	0.847483	5	0.0913909	0.415273	0.995687	3	0.976102	0.995506	0.925935	5	0.391461	0.773351	0.714596	3	0.0186981
166	XP_002296348.1	883	62689.7	TSLLDAIR;QAGVPLLVAVNK;IMLQAEVLDLK	1;1;1	3	5	66359;66361;241214;255033;258073	ACI65065.1	bacterial protein translation initiation factor 2 [Thalassiosira pseudonana CCMP1335]	0.705243	5	0.0368963	0.173596	0.816874	5	0.20328	0.576469	0.645796	5	0.0965903	0.323946	0.753791	5	0.241976	0.603934	0.994277	4	0.954305	0.990535	1.19359	4	0.134387	0.458136	0.990885	5	0.906209	0.980924	1.19487	3	0.230177	0.606255	1.03714	4	0.609439	0.893901	0.890903	5	0.264274
167	EED95892.1	60	61508.6	SVALGDYLNR;GLVAFVPDGAILPR;AVQIFDQTLPQLVQK	1;1;1	3	5	128318;220367;220388;220389;324970	XP_002286251.1	hypothetical protein THAPSDRAFT_260965, partial [Thalassiosira pseudonana CCMP1335]	0.912428	5	0.655034	0.8711	0.870198	5	0.270673	0.646887	0.857981	5	0.433157	0.735958	0.831986	5	0.0612939	0.271822	1.07125	5	0.537746	0.843246	1.1207	5	0.305969	0.688431	1.14052	4	0.164284	0.5466	1.11974	5	0.251175	0.629937	0.990071	5	0.860114	0.966982	1.05881	5	0.758524
168	EJK62881.1	1760	61347.2	SPGVMMGYFK;YLSYLPISHGMER;TLEEMATIIYTSGSTGVPK	1;1;1	3	4	226969;252579;255738;346001	-	hypothetical protein THAOC_16491 [Thalassiosira oceanica]	0.983397	4	0.926507	0.982676	1.019	4	0.926107	0.974224	1.11147	4	0.615338	0.855112	1.15526	4	0.408059	0.754732	1.03121	4	0.871113	0.972166	1.00329	4	0.991701	0.99911	1.19569	4	0.112889	0.467126	1.42797	3	0.039596	0.214573	1.24911	3	0.0440956	0.296164	0.983871	4	0.931307
169	EED88227.1	1144	60898.7	VIADGFDIAR;MLVGGAGQIK;GIDPLSLDIFAK	1;1;1	3	7	118858;118862;118872;118873;182288;258071;258075	XP_002294393.1	t-complex protein 1 zeta subunit [Thalassiosira pseudonana CCMP1335]	0.917662	7	0.376562	0.70046	0.994163	7	0.883412	0.957156	1.06746	7	0.629237	0.862318	1.15983	7	0.0878912	0.332033	0.917393	7	0.605439	0.889858	0.800514	7	0.238776	0.611376	1.09589	7	0.490551	0.852309	0.972468	7	0.881512	0.969879	1.16761	7	0.0957904	0.42768	0.940803	7	0.405259
170	EED89895.1	1557	60619.1	ASSSFGL;VGPSLGSFSVSAK;LPVCHQLADGSYEPITVLEAVVR	1;1;1	3	4	23359;247187;357782;357783	XP_002292699.1	predicted protein [Thalassiosira pseudonana CCMP1335]	1.60415	4	0.0985901	0.323606	1.32966	4	0.0545945	0.28682	1.26765	3	0.185381	0.482205	1.46863	3	0.0155984	0.109798	0.909461	4	0.334167	0.704801	0.962346	4	0.720528	0.929692	0.924855	4	0.50085	0.8586	0.988957	4	0.910309	0.976494	1.00566	4	0.937906	0.985468	0.88057	3	0.284572
171	EED93501.1	938	56536	SGEACSIVLR;IHPQTIAEGWR;SLHDALCILTATVK	1;1;1	3	7	123233;123238;190809;190813;190814;190815;302952	XP_002289964.1;EJK75596.1	the t-complex beta chaperonin-like protein, partial [Thalassiosira pseudonana CCMP1335]	0.618028	7	0.0715928	0.269333	0.991463	7	0.935506	0.976803	0.609102	7	0.10199	0.338276	0.985759	7	0.911709	0.97334	0.628988	6	0.00929907	0.078173	0.594164	7	0.0115988	0.0862724	0.665962	6	0.00049995	0.0113913	0.610642	7	0.00479952	0.0505213	1.01028	7	0.910409	0.97835	0.654909	7	0.0673933
172	EED93445.1	640	56493.2	ILSDQAIR;SQDAITFAR;LFAANVGDSR	1;1;1	3	3	73114;98898;110848	XP_002289908.1	hypothetical protein THAPSDRAFT_262261, partial [Thalassiosira pseudonana CCMP1335]	0.787415	3	0.118288	0.366226	1.18445	3	0.207279	0.580898	0.60313	3	0.0226977	0.122391	0.92603	3	0.555744	0.848579	1.3727	3	0.139086	0.458271	1.31431	3	0.150885	0.4888	1.1054	3	0.506649	0.864287	1.07068	3	0.626237	0.906131	0.8087	3	0.10379	0.451259	0.682543	3	0.010399
173	EED88078.1	44	55623.4	SLAPNVLNIGR;QGVVGISEIIIK;IVPENTPVTDAFLVADDILR	1;1;1	3	4	142789;142790;251549;339063	XP_002294718.1	predicted protein [Thalassiosira pseudonana CCMP1335]	1.2459	4	0.0575942	0.232701	1.17273	4	0.145485	0.501271	1.0018	4	0.990801	0.997184	0.964856	4	0.875312	0.962363	1.46042	3	0.0215978	0.14498	1.40391	3	0.0565943	0.268786	1.17581	4	0.150685	0.529752	1.25792	4	0.159384	0.488523	0.934303	3	0.477552	0.83294	1.05865	4	0.511349
174	EJK59001.1	1679	55036.8	LGGSDIIVSELGLGTQR;GWGMCNDNAYGLTGCTR;LGTDYIDVYQLHWPAR	1;1;1	3	3	281585;313648;315374	-	hypothetical protein THAOC_20836 [Thalassiosira oceanica]	1.00434	3	0.990201	0.997396	1.0443	3	0.664734	0.884231	1.06779	3	0.70203	0.895383	1.11776	3	0.534147	0.837691	1.14955	3	0.40376	0.760623	1.29753	3	0.455154	0.811076	1.24998	3	0.0875912	0.405075	1.44933	3	0.116288	0.415723	1.07417	3	0.759224	0.931563	0.976443	3	0.909509
175	XP_002286873.1	448	54002.1	TPANQSIFR;GQEILSGAQR;VFEIGPVFR	1;1;1	3	7	106267;106268;106271;113455;113456;115029;115030	EED96514.1;EJK74501.1	aspartate-trna ligase [Thalassiosira pseudonana CCMP1335]	0.667775	7	0.00019998	0.00367718	0.853965	7	0.00859914	0.0851409	0.537608	7	0.0001	0.00211861	0.69388	7	0.00439956	0.0440445	1.0043	7	0.954305	0.990535	0.86306	7	0.10149	0.387038	0.850702	7	0.0827917	0.394246	0.734643	7	0.0319968	0.189981	0.846715	7	0.0520948	0.326727	0.814553	7	0.00589941
176	XP_002290333.1	28	52733.9	YSILDAPGHK;VESGTIRPGMK;EHLNLVFIGHVDAGK	1;1;1	3	5	53921;215381;215382;233202;316094	EED92085.1	translation elongation factor-1-alpha [Thalassiosira pseudonana CCMP1335]	1.03648	5	0.834017	0.954187	0.92456	4	0.369363	0.700623	1.03235	5	0.783422	0.921018	0.969411	4	0.748325	0.913606	0.982113	5	0.924708	0.985949	0.747328	5	0.113789	0.415343	1.01982	5	0.871113	0.976341	0.783521	5	0.0237976	0.155202	1.02375	5	0.808819	0.950094	0.985571	5	0.937106
177	XP_002295558.1	78	52618.7	DSALIHVLNR;AFSPTTINTGR;IIEVNYNVK	1;1;1	3	4	137739;146261;213291;213301	ACI64275.1;EJK49661.1	protein translocase complex subunit [Thalassiosira pseudonana CCMP1335]	0.541866	4	0.00179982	0.0197761	0.711586	3	0.0109989	0.100609	0.402118	3	0.00059994	0.00806337	0.619057	4	0.0176982	0.118558	1.18606	4	0.371163	0.739449	1.02843	4	0.791921	0.946727	0.994665	4	0.977202	0.993867	0.864187	4	0.188881	0.544849	0.916989	3	0.362164	0.754636	0.748075	4	0.0286971
178	XP_002292145.1	1548	51522	FVNLDVAK;ILPASFWNK;EYDLLVQLIK	1;1;1	3	3	160709;209247;246754	EED90996.1	sulfolipid biosynthesis protein [Thalassiosira pseudonana CCMP1335]	1.0722	3	0.607639	0.852292	1.02961	3	0.770723	0.913546	1.41788	3	0.0743926	0.267962	1.35852	3	0.150785	0.460363	0.777081	3	0.29567	0.666555	0.888871	3	0.735826	0.936644	1.0627	3	0.646635	0.908327	1.23877	3	0.315768	0.703445	1.33456	3	0.0781922	0.403283	1.05689	3	0.637236
179	EJK66715.1	795	50027.2	TISPSMDICVSSNFER;LAVLGATSGDTGSAAIYGLR;MGLPVGDLIVATNENDILHR	1;1;1	3	7	304654;308839;308840;308841;308842;308852;337610	EED89364.1;XP_002293628.1	hypothetical protein THAOC_12335 [Thalassiosira oceanica]	0.84092	7	0.132187	0.390493	0.969711	7	0.559244	0.829191	0.728574	6	0.0158984	0.0954435	0.765487	7	0.059694	0.269596	1.22718	7	0.210279	0.557953	1.45769	7	0.0079992	0.0685646	0.992049	7	0.942206	0.988904	1.19237	7	0.0866913	0.355055	0.835778	7	0.0883912	0.414097	0.8934	7	0.347965
180	EED96472.1	1710	49612.9	GNIPEGLYL;AICTEAGMLALR;GVILYGEPGTGK	1;1;1	3	4	89363;190229;236967;236970	XP_002286831.1	26S proteasome ATPase regulatory subunit 4 [Thalassiosira pseudonana CCMP1335]	1.01935	4	0.855614	0.960372	1.04168	4	0.743426	0.909461	0.850805	3	0.340166	0.668483	0.833832	4	0.182982	0.518448	1.03653	3	0.778522	0.947965	1.06762	4	0.547245	0.859515	1.01752	3	0.881812	0.978638	0.885912	4	0.506349	0.84069	0.829341	4	0.19548	0.593364	0.994017	4	0.965004
181	EED89518.1	1067	49598.1	EACGLIVDLIR;ALLLAGAPGTGK;SLESTLSPIVVFATNR	1;1;1	3	6	176084;176090;207549;284893;284901;284902	XP_002293057.1	RuvB dna-helicase [Thalassiosira pseudonana CCMP1335]	1.29425	6	0.250175	0.557431	0.832523	6	0.0636936	0.309369	0.789182	5	0.238976	0.548974	0.637768	6	0.0009999	0.0146489	1.34302	6	0.0689931	0.307611	1.19209	6	0.258574	0.640232	1.07363	6	0.728427	0.934424	0.961245	6	0.759424	0.942982	0.824778	6	0.20128	0.60384	1.45663	6	0.0265973
182	XP_002290153.1	1605	48388.9	IQLFDYLK;QPASTVQILGAEK;MHLLFETPAGYSLFK	1;1;1	3	6	200169;200170;200171;268668;268669;327503	EED91905.1;EJK45623.1	SAR DNA-binding protein [Thalassiosira pseudonana CCMP1335]	0.836252	4	0.106289	0.341414	0.925512	6	0.130387	0.468042	0.558513	5	0.00049995	0.00714611	0.696187	4	0.00539946	0.049642	0.921667	6	0.626437	0.898837	0.787344	6	0.113989	0.415343	0.779791	6	0.243676	0.663378	0.671427	6	0.0734927	0.329892	0.753746	5	0.00089991	0.024543	0.871684	5	0.0833917
183	XP_002297607.1	633	47270	SVYAAIPGR;AVDHLCFSR;INEEVFIAMAK	1;1;1	3	4	77762;127171;253356;253363	EED86098.1;EED91739.1;XP_002291632.1;EJK73821.1	predicted protein, partial [Thalassiosira pseudonana CCMP1335]	0.989282	4	0.905809	0.979399	1.05691	4	0.542946	0.820947	0.819407	3	0.249975	0.562953	1.05129	3	0.70373	0.903334	0.893732	4	0.438456	0.78215	1.12256	4	0.59814	0.886134	0.844571	4	0.116488	0.475609	1.07095	4	0.675132	0.922869	0.946992	4	0.505049	0.852005	0.945003	4	0.529147
184	XP_002296689.1	457	47183.7	TPLTSIVGGAK;KTPLTSIVGGAK;ALLEAVAETTAAGNVGIIGGGDSATAAAK	1;1;1	3	7	201221;201222;201224;201225;292187;292188;365324	EED86890.1	phosphoglycerate kinase [Thalassiosira pseudonana CCMP1335]	1.05498	6	0.605039	0.84979	1.04147	7	0.30497	0.67265	0.929118	6	0.356564	0.680458	1.06477	6	0.561844	0.852224	0.878542	7	0.163084	0.4946	0.78517	7	0.0108989	0.0827765	0.833603	7	0.0314968	0.208435	0.752737	7	0.0422958	0.224579	1.0213	6	0.778322	0.945559	0.941887	7	0.687931
185	EED96217.1	1085	46964.5	ACMSIPAAK;NVPAGLGAPVFDK;GFESGDGFGGTLLTGK	1;1;1	3	5	174125;257346;257348;303031;303035	XP_002286576.1	predicted protein [Thalassiosira pseudonana CCMP1335]	1.50152	5	0.00169983	0.018908	1.63675	5	0.00519948	0.0593004	1.5451	5	0.0155984	0.0945885	1.73886	5	0.020098	0.128428	0.899503	5	0.405559	0.760623	1.00829	5	0.949905	0.987099	1.00692	4	0.940106	0.988536	1.15128	4	0.20198	0.567182	1.05681	5	0.459854	0.821704	0.905223	5	0.167483
186	EED95831.1	418	45663.7	NFGLYGER;SAVMSQLK;DSSGKPWILPSVR	1;1;1	3	4	83766;152362;286800;286808	XP_002286190.1	aspartate aminotransferase [Thalassiosira pseudonana CCMP1335]	0.921192	3	0.545345	0.820763	1.04398	4	0.724828	0.902269	0.96797	3	0.846615	0.939443	1.06792	4	0.673733	0.892606	0.876612	3	0.326367	0.700638	1.12302	4	0.386961	0.762903	1.00132	4	0.989501	0.996081	1.20943	4	0.29597	0.677795	0.958842	3	0.659734	0.911202	1.05149	4	0.756824
187	EED86453.1	519	45447.8	TELHGLAK;LSLEATMINQNFTQQILR;LPTGALFFDK	1;1;1	3	5	148981;148983;194822;334534;217476	XP_002297246.1	predicted protein, partial [Thalassiosira pseudonana CCMP1335]	0.6027	5	0.0120988	0.0764983	0.697803	5	0.0257974	0.172814	0.526743	5	0.0143986	0.0903547	0.712045	4	0.0226977	0.13912	1.08153	4	0.420958	0.775131	0.699873	5	0.0133987	0.096086	1.04782	4	0.60014	0.89961	0.636305	5	0.0236976	0.155112	0.924364	5	0.361364	0.754588	0.938572	5	0.624838
188	XP_002289836.1	966	45090.1	IVFSSSPSTR;VISFDVVPPPK;DNLFLPNLLEAAMNGK	1;1;1	3	3	120157;238483;328025	EED93373.1	predicted protein [Thalassiosira pseudonana CCMP1335]	0.746395	3	0.232477	0.535707	0.719945	3	0.0436956	0.249967	0.674285	3	0.365963	0.685848	0.64711	3	0.236376	0.597326	0.899109	3	0.773023	0.945725	0.874408	3	0.593141	0.886111	0.850636	3	0.446755	0.816406	0.831763	3	0.356264	0.738797	0.942558	3	0.781622	0.945559	1.07678	3	0.783322
189	EED91716.1	1567	43155.7	DLVIQYSVK;FAEETFFK;DGCTHVGFELWQVK	1;1;1	3	7	48695;194686;194687;194690;319252;319253;319255	XP_002291609.1	calreticulin-like protein, partial [Thalassiosira pseudonana CCMP1335]	1.17673	6	0.0278972	0.140421	1.03399	6	0.750725	0.912141	1.55189	7	0.0110989	0.0732202	1.15996	7	0.105589	0.37016	0.826508	7	0.122888	0.430107	0.794175	7	0.0412959	0.216083	1.01251	6	0.832217	0.960557	1.02484	7	0.670133	0.92064	1.23872	7	0.0691931	0.379658	1.33354	7	0.10039
190	EED93881.1	744	41990.2	VTVAMLER;HMEGQTVTIINR;VHGIIVYYPIFGQVESFSGESQDDYLR	1;1;1	3	5	78012;78036;213912;213919;367262	XP_002288445.1	predicted protein [Thalassiosira pseudonana CCMP1335]	0.907775	4	0.340066	0.658216	1.16096	4	0.29987	0.671869	0.724346	5	0.0668933	0.252039	0.785546	4	0.0543946	0.252626	0.987157	5	0.959404	0.990535	0.901191	5	0.675532	0.906755	1.06085	4	0.611639	0.902934	0.857443	5	0.425557	0.79701	0.940647	5	0.640736	0.90655	0.831447	5	0.0771923
191	EJK52520.1	1043	41610.6	GLVDVAVAPK;LQAVETAESPINR;DALYEEVNKPSLR	1;1;1	3	11	180777;180779;220987;220988;220995;221024;301660;301661;301662;301673;301674	XP_002292286.1;EED90261.1	hypothetical protein THAOC_28191 [Thalassiosira oceanica]	0.961367	11	0.676232	0.879834	0.959608	11	0.508449	0.79842	1.08458	11	0.446855	0.745863	1.08526	11	0.229177	0.589756	0.869637	11	0.112989	0.41064	1.03796	10	0.687431	0.908744	1.01993	11	0.828517	0.960557	1.24548	10	0.0217978	0.145319	1.1492	11	0.00449955	0.0729657	1.02034	11	0.758324
192	EED93777.1	1730	40988.2	GEVLLLENTR;LPVIESLLEK;VDLNVPLSK	1;1;1	3	6	22421;139805;139809;59893;225133;185572	XP_002288341.1	phosphoglycerate kinase [Thalassiosira pseudonana CCMP1335]	1.42231	5	0.00229977	0.0243776	1.46096	6	0.00039996	0.0105989	1.07969	5	0.491451	0.778771	1.41683	6	0.106489	0.371843	1.44293	5	0.00249975	0.0308017	1.11099	5	0.224478	0.593861	1.22711	5	0.0182982	0.148364	0.990914	6	0.912609	0.978284	0.97919	6	0.884612	0.972078	0.987023	5	0.875312
193	EED92254.1	1078	40653.3	GYTVHGIIR;FYQASTSELYGK;VQEVPQSETTPFYPR	1;1;1	3	10	100956;278441;291717;291718;291719;291724;291725;291726;329734;329735	XP_002290502.1	gdp-d-mannose 4,6-dehydratase [Thalassiosira pseudonana CCMP1335]	0.705052	10	0.0348965	0.167243	1.255	10	0.0139986	0.115713	0.675134	10	0.0619938	0.240627	1.242	10	0.00289971	0.0318614	0.742031	10	0.0229977	0.150447	1.01969	10	0.824318	0.955539	0.744709	10	0.00119988	0.0201849	1.03142	10	0.506749	0.84069	0.994247	10	0.941106	0.985468	0.578087	10	0.0209979
194	EED91482.1	1271	39662.2	QCDAIVHVVR;APQAAGVIHGDFER;GASDGEGLGNQFLATIR	1;1;1	3	4	156277;156283;230496;280000	XP_002291375.1	GTP binding protein [Thalassiosira pseudonana CCMP1335]	0.749673	4	0.125887	0.379982	0.882192	4	0.612239	0.858844	0.887496	3	0.485551	0.775406	1.03219	3	0.808319	0.936576	0.851252	4	0.154785	0.48176	0.72348	4	0.175782	0.524179	0.902118	4	0.261874	0.68216	0.770775	4	0.210079	0.579085	1.03627	4	0.715528	0.926526	1.11161	3	0.60284
195	EED94936.1	1290	37723.8	SIIFANYLAR;AQSQFQGMDVR;ATFLVISHAQAK	1;1;1	3	4	147333;178468;178469;257552	XP_002287493.1	rag-type gtp-binding protein [Thalassiosira pseudonana CCMP1335]	1.09384	4	0.70103	0.886495	0.946211	4	0.454155	0.756266	1.00436	4	0.984902	0.993173	0.871406	4	0.332967	0.692497	1.29263	4	0.344366	0.716201	0.93226	4	0.777822	0.943972	1.22591	4	0.479452	0.845301	0.893794	4	0.713129	0.936167	0.955063	4	0.735726	0.926988	1.16477	4	0.437856
196	EJK59967.1	685	37634.5	LEGLAALK;RMESLLMSNQIR;LDLSTNPYLEK	1;1;1	3	7	131936;240331;240336;258895;258899;258900;258902	EED91260.1;XP_002291153.1	hypothetical protein THAOC_19753 [Thalassiosira oceanica]	0.854565	6	0.0849915	0.297388	1.08159	7	0.30047	0.671869	0.961726	6	0.631537	0.862318	1.20476	7	0.0206979	0.130869	0.873848	7	0.325167	0.700638	0.815849	7	0.193281	0.548746	0.989206	7	0.928107	0.984439	0.937861	7	0.655634	0.915893	1.11445	7	0.0909909	0.417668	0.865165	7	0.167483
197	XP_002288820.1	948	37417.3	YVGSMVADIHR;AGVAQLYGLAGEVNSTGDDQK;TLLYGGIYIYPADK	1;1;1	3	19	172264;172265;172266;172270;172278;172289;177529;177533;177534;177535;253086;253089;237455;350898;350900;350901;308597;308598;308603	EED94256.1;EJK72926.1	predicted protein [Thalassiosira pseudonana CCMP1335]	0.983576	19	0.821218	0.94922	0.895674	19	0.0549945	0.288082	1.27111	19	0.00089991	0.0111009	1.13552	19	0.0280972	0.161246	0.992406	17	0.857614	0.969126	0.788315	17	0.00439956	0.0444899	1.20517	19	0.00129987	0.021079	1.06746	17	0.222678	0.593807	1.27521	19	0.0001	0.0049995	1.11784	19	0.126587
198	EED91842.1	1263	36984.8	FSQFDPAPR;QITQVYGFYDECLR;GAGYTFGQDITEQFTHINNLHFIAR	1;1;1	3	3	115191;294040;364415	XP_002290090.1	phosphatase of serine threonine protein phosphatase [Thalassiosira pseudonana CCMP1335]	0.951902	3	0.778822	0.928199	1.24713	3	0.0651935	0.312443	0.915765	3	0.805819	0.929712	1.23207	3	0.131487	0.423106	1.03628	3	0.889011	0.978479	0.832438	3	0.461354	0.815753	1.0384	3	0.749825	0.939892	0.842555	3	0.246375	0.625148	0.98529	3	0.929007	0.983092	0.767447	3	0.221678
199	EED87136.1	1534	36744.3	QYYMSAGDIACPIVFR;VFILGEEVAQYQGAYK;VIDTPITEMGFTGMAIGAAYK	1;1;1	3	6	308531;310525;333080;333083;355037;355704	XP_002296440.1	pyruvate dehydrogenase [Thalassiosira pseudonana CCMP1335]	1.13616	5	0.124088	0.377076	1.11315	5	0.0907909	0.386649	1.1143	5	0.278372	0.598268	1.04131	6	0.628737	0.885578	1.04463	5	0.564744	0.855197	1.10461	6	0.333767	0.71437	1.16894	6	0.105689	0.453383	1.17097	6	0.250075	0.62868	1.03567	6	0.60254	0.893901	1.21922	6	0.0892911
200	EJK74888.1	1561	36180.6	LVGVTTLDVCR;KLVGVTTLDVCR;AGAGSATLSMAYAGYIFTENVLK	1;1;1	3	5	167690;272159;272161;272167;360528	-	hypothetical protein THAOC_03405 [Thalassiosira oceanica]	1.39921	3	0.0456954	0.202816	1.07826	5	0.30247	0.671869	1.08146	5	0.528247	0.804884	0.834499	5	0.19738	0.539726	0.978645	5	0.90181	0.979117	0.891484	5	0.518648	0.851893	0.6666	4	0.00149985	0.0234759	0.633672	4	0.00219978	0.031178	0.924559	4	0.276272	0.678431	1.30649	5	0.00429957
201	EED93201.1	1350	35809.3	AVGGALDFR;AEVPWLFEVSR;VQDCDIAAEFVRPK	1;1;1	3	4	70485;197259;197260;315925	XP_002289664.1	predicted protein [Thalassiosira pseudonana CCMP1335]	1.01948	3	0.885811	0.973136	1.07414	4	0.627937	0.860489	0.671613	4	0.219478	0.525638	0.973152	4	0.780022	0.929491	1.218	3	0.168683	0.502419	0.957271	4	0.790421	0.946612	1.01295	4	0.90191	0.980924	0.89294	4	0.323368	0.712438	0.927993	4	0.555944	0.877688	0.728108	4	0.327067
202	XP_002292065.1	1251	35477.6	VLDLQIQMR;TPAFCAGGDQTVR;MGSVDAGYGSVHLAR	1;1;1	3	5	135800;209063;209064;209065;299408	EED90916.1	probable naphthoate synthase [Thalassiosira pseudonana CCMP1335]	1.19164	5	0.112989	0.35441	1.1542	5	0.159284	0.523777	1.11833	5	0.262874	0.577444	1.15033	4	0.161084	0.478999	1.10948	4	0.294571	0.66536	1.17493	5	0.333367	0.71437	1.16764	4	0.110489	0.460323	1.16061	5	0.138686	0.453882	1.07231	4	0.328367	0.727373	1.0131	4	0.880212
203	EJK52057.1	198	35441	GLPQLTASLVK;GYDVVICDVK;GGGTPGYATYGATK	1;1;1	3	7	221768;221769;231452;260516;260517;260523;260524	EED90452.1;XP_002292477.1	hypothetical protein THAOC_28713 [Thalassiosira oceanica]	0.802682	7	0.152185	0.428002	1.06508	7	0.533147	0.812953	1.02325	6	0.782522	0.921018	1.28781	7	0.0412959	0.20962	0.776571	7	0.0229977	0.150447	0.799677	7	0.060094	0.281691	0.958489	7	0.647335	0.908327	1.00554	7	0.964804	0.994746	1.12585	6	0.108489	0.459672	0.779879	7	0.126587
204	EED94476.1	628	35058	VTYATDAVK;VLFLTDIAGVLDK;IVVVHGGGPMINAMLEK	1;1;1	3	6	180431;180436;280442;280444;328572;330097	XP_002289040.1	predicted protein [Thalassiosira pseudonana CCMP1335]	1.4904	6	0.0737926	0.273048	1.11517	4	0.159284	0.523777	1.41096	6	0.137486	0.406589	1.1945	5	0.0850915	0.324175	1.17535	6	0.189681	0.527987	1.28196	6	0.0444956	0.224851	1.24586	5	0.0130987	0.116721	1.29678	6	0.0273973	0.17064	0.98849	6	0.842516	0.964516	1.28742	6	0.0650935
205	XP_002297308.1	1403	34986	SVQTLLR;FGPTNQILPASGR;YVATGLLPEFQQLDGR	1;1;1	3	9	49706;203726;203728;203729;296656;296666;296668;296673;332416	EED86379.1;EJK75937.1	predicted protein [Thalassiosira pseudonana CCMP1335]	1.06295	9	0.629037	0.861996	1.07786	7	0.0813919	0.361252	1.23568	9	0.118988	0.373341	1.15417	8	0.178082	0.511809	0.973766	9	0.705929	0.923726	1.17605	9	0.106389	0.400629	1.08018	8	0.176482	0.567265	1.43223	9	0.00039996	0.008181	1.05913	8	0.226477	0.627168	1.0027	9	0.981502
206	XP_002297273.1	832	34892.6	TPVWLMR;GLGPVISTEVR;EILGSLSK	1;1;1	3	3	69731;134647;141869	EED86423.1;EED94520.1;XP_002289084.1	predicted protein [Thalassiosira pseudonana CCMP1335]	0.887667	3	0.430957	0.736861	0.862792	3	0.168083	0.53419	1.13794	3	0.532347	0.810445	1.07054	3	0.744426	0.913606	0.889433	3	0.671733	0.912715	0.726672	3	0.0674933	0.300713	1.15329	3	0.237876	0.657722	0.954028	3	0.751625	0.94176	1.27306	3	0.167383	0.554862	1.07593	3	0.531047
207	EED94042.1	646	32900.6	GDVGEVFYILK;YMLANNNASQQK;VHDIGFGDSQYVDQILGPGDFFGER	1;1;1	3	9	248031;248041;248043;248044;276065;279262;279263;362936;362938	XP_002288606.1	Hypothetical protein THAPSDRAFT_32704, partial [Thalassiosira pseudonana CCMP1335]	1.19751	9	0.307669	0.625051	1.11356	9	0.212879	0.58655	1.53203	9	0.0190981	0.106819	1.38535	9	0.00389961	0.0403856	0.986368	9	0.846315	0.962403	1.0617	8	0.242976	0.616864	1.24229	9	0.00109989	0.0190366	1.30801	7	0.00089991	0.015427	1.16953	8	0.00149985	0.0329235	1.08885	9	0.311969
208	EED91740.1	1458	32376.4	LYSIASTR;NNQWHVEVY;LYVQHVIAQNGK	1;1;1	3	3	71883;153636;274010	XP_002291633.1	predicted protein, partial [Thalassiosira pseudonana CCMP1335]	1.07334	3	0.60244	0.849449	1.15938	3	0.362164	0.694276	1.03025	3	0.859514	0.943893	1.13683	3	0.674633	0.892606	0.790969	3	0.110589	0.404369	0.827901	3	0.228577	0.598892	0.792944	3	0.237476	0.657627	0.836257	3	0.339366	0.726776	0.992825	3	0.952005	0.985468	0.92776	3	0.686431
209	XP_002289051.1	1138	28291.4	EVAEAGVDMMVAGSAILK;AGLVFNPATSLDYAHHVK;EVAEAGVDMMVAGSAILKEPR	1;1;1	3	19	330970;330979;330980;330989;330994;330995;330997;330998;331000;331001;331002;331003;331004;331005;332398;342370;354497;354498;354499	EED94487.1	predicted protein [Thalassiosira pseudonana CCMP1335]	1.84749	19	0.0001	0.00219734	1.06236	19	0.107489	0.42463	2.10978	19	0.0001	0.00211861	1.17046	18	0.00049995	0.0091001	0.979678	19	0.611739	0.89257	1.78882	17	0.0001	0.00239976	1.10499	18	0.0114988	0.107802	1.92025	19	0.0001	0.00260844	1.12608	19	0.00089991	0.024543	1.65546	19	0.0001
210	EJK73267.1	1766	28282.2	EVAEAGVNMMVAGSAILK;AGLVFNPATSIDYCEFVK;EVAEAGVNMMVAGSAILKEPR	1;1;1	3	7	330886;330887;347844;347845;347847;347848;354455	-	hypothetical protein THAOC_05120 [Thalassiosira oceanica]	1.8887	6	0.00419958	0.0358656	0.958628	7	0.286871	0.661204	2.06277	6	0.00379962	0.0330585	1.05383	7	0.314169	0.677191	0.922363	7	0.163384	0.4946	1.77113	7	0.00039996	0.00742194	1.04632	7	0.425557	0.805949	2.06905	7	0.0001	0.00260844	1.11588	7	0.0172983	0.172983	1.81768	6	0.00689931
211	EJK46744.1	1321	26715.3	AGYFLPQGI	1;1;1	3	10	86671;86679;86686;86692;86693;86694;86695;179856;179857;179858	EED94820.1;XP_002287377.1	hypothetical protein THAOC_34573 [Thalassiosira oceanica]	0.211353	10	0.0001	0.00219734	0.670794	10	0.00489951	0.0577053	0.138059	10	0.0001	0.00211861	0.447938	10	0.00139986	0.0186855	1.01291	10	0.860314	0.969539	1.08349	10	0.349465	0.726371	0.711236	10	0.0250975	0.178559	0.756584	10	0.0342966	0.19536	0.759444	9	0.00359964	0.0629063	0.343268	10	0.0001
212	EJK60490.1	449	26419.6	SVLAFAGLTADAR;GKDCVVLAVER;AITVFSPDGHLFQVEYAMEAVR	1;1;1	3	9	186446;186461;186462;249272;249277;249279;249286;363290;363584	EED95903.1;XP_002286262.1	hypothetical protein THAOC_19150 [Thalassiosira oceanica]	1.1705	9	0.132887	0.391918	0.986503	9	0.789921	0.918347	0.95656	7	0.638336	0.867001	0.83832	9	0.0947905	0.344743	1.11504	9	0.348665	0.717882	0.894775	9	0.180082	0.530241	0.930519	8	0.354465	0.748624	0.749265	8	0.00029997	0.00642793	0.880084	9	0.0361964	0.25651	1.17947	9	0.123188
213	EED87657.1	1423	26061.2	YQEDMELEDAIHTALLTLR;LFQVDPSGAYFGWK;RYQEDMELEDAIHTALLTLR	1;1;1	3	3	218489;312031;352521	XP_002294877.1	proteasome subunit alpha type 2 [Thalassiosira pseudonana CCMP1335]	1.34034	3	0.0706929	0.266503	1.18516	3	0.351265	0.689554	1.18913	3	0.473253	0.765106	1.09673	3	0.49525	0.8109	1.13826	3	0.618238	0.893789	0.877952	3	0.682932	0.908525	1.03667	3	0.80312	0.955652	0.798699	3	0.277772	0.658748	0.932694	3	0.519948	0.861993	1.062	3	0.782422
214	EED88926.1	945	24031.8	YILGGSGYFDVR;DLGICYWK;AGDLMTLPEGIYHR	1;1;1	3	8	200799;203921;203922;203924;254125;254130;306968;308834	XP_002293917.1	predicted protein [Thalassiosira pseudonana CCMP1335]	1.13542	7	0.0606939	0.241698	0.982995	8	0.788821	0.91766	1.89853	8	0.0079992	0.0573967	1.494	8	0.00479952	0.0462499	0.609599	8	0.00639936	0.05965	0.603774	8	0.0049995	0.0491754	0.95649	8	0.489751	0.852309	0.96407	8	0.590641	0.885224	1.49144	6	0.0001	0.0049995	1.22703	6	0.00519948
215	EJK77607.1	1610	23798.3	SFDDYLAFAN;YGGFGAGSPEVIDPK;AILQDITELEVSQK	1;1;1	3	14	145475;295122;295166;308609;308610;308611;308614;308619;308620;308621;308622;308623;308624;308634	-	hypothetical protein THAOC_00549 [Thalassiosira oceanica]	2.1654	14	0.0001	0.00219734	1.86857	14	0.0001	0.00353298	2.35191	14	0.0001	0.00211861	2.1839	14	0.0001	0.00261133	0.810351	14	0.00049995	0.0097762	1.09813	13	0.166683	0.515515	0.906605	14	0.0180982	0.148076	1.37631	12	0.0001	0.00260844	1.10059	14	0.0665933	0.371108	1.00227	13	0.952005
216	AAO43933.1	1778	23094.2	CTIQMPSGEFQR;FSVSGDLGTGNVLVR;DMQVLGDTATISCTK	1;1;1	3	7	227143;227145;242826;242829;242830;314993;315001	-	proliferating cell nuclear antigen, partial [Skeletonema costatum]	1.08703	7	0.260074	0.569445	1.06277	7	0.532047	0.812499	0.987936	7	0.866513	0.946303	1.05792	6	0.447255	0.787157	1.01074	6	0.90181	0.979117	0.821808	7	0.178882	0.529585	0.876237	7	0.183582	0.576696	0.786918	7	0.0866913	0.355055	0.944772	7	0.333167	0.728676	1.07188	5	0.312469
217	EJK45846.1	984	22879.2	AAMIAMASLFAMK	1;1;1	3	8	277311;277316;277320;277324;277327;280348;280349;280352	XP_002290280.1;EED92032.1	hypothetical protein THAOC_35518 [Thalassiosira oceanica]	0.708957	7	0.00589941	0.044667	1.09187	8	0.0859914	0.369825	0.548715	7	0.00139986	0.0154672	0.874823	7	0.0989901	0.355698	1.28914	7	0.00239976	0.03019	1.44265	8	0.00149985	0.0206086	1.14596	7	0.0610939	0.329249	1.20657	7	0.0227977	0.151424	0.776637	8	0.0275972	0.228917	0.633794	8	0.00129987
218	XP_002286571.1	344	22439.4	KQWFNVK;QWFNVKDELTR;KQWFNVKDELTR	1;1;1	3	7	251165;251169;285744;285751;337293;337294;337295	EED96212.1	predicted protein [Thalassiosira pseudonana CCMP1335]	1.1019	7	0.552545	0.822881	1.18638	7	0.0731927	0.340809	1.19191	7	0.288171	0.608436	1.29516	7	0.0161984	0.113138	0.42335	5	0.0001	0.0035271	1.00943	6	0.89731	0.977859	0.469216	5	0.0001	0.0036731	1.24578	7	0.019798	0.133972	1.06872	6	0.169683	0.557353	0.940837	7	0.491551
219	EED90123.1	1203	21649.6	GAFTGSVAASMVK;SVGCEYVLCGHSER;TLFSDSDVNINAK	1;1;1	3	16	244956;244962;248500;248506;269788;269789;269790;269792;316470;316472;316473;283794;283804;283806;283809;283814	XP_002292927.1	triose-phosphate isomerase, partial [Thalassiosira pseudonana CCMP1335]	1.21806	16	0.0223978	0.123427	1.05897	16	0.410559	0.724959	1.20874	16	0.0150985	0.0928068	1.05001	16	0.333567	0.692497	0.751599	16	0.00649935	0.0599607	1.11956	16	0.214579	0.580753	0.77494	16	0.00039996	0.00959904	1.13998	15	0.00319968	0.0373548	1.01028	16	0.854915	0.966982	1.16009	16	0.0149985
220	XP_002288023.1	1378	21069.7	QTAELQHGR;RQTAELQHGR;LAELKHGR	1;1;1	3	4	13752;107973;156047;166364	EED95466.1;EJK69096.1	fucoxanthin-chlorophyll a-c binding protein, plastid precursor [Thalassiosira pseudonana CCMP1335]	0.705713	4	0.00969903	0.064732	0.87601	4	0.109589	0.428372	0.806366	4	0.19918	0.504634	0.998203	4	0.987201	0.998281	0.785669	4	0.0392961	0.216078	0.594909	4	0.0248975	0.150894	0.868309	4	0.137586	0.52104	0.738503	4	0.0231977	0.152952	1.08031	4	0.283672	0.690657	0.877184	3	0.271873
221	XP_002287959.1	1273	21056.4	VWLGHMDVPGLAMSR;IDTEFSGTTLSMAIIR;SLGDAVAHTAGVISDPEFTEK	1;1;1	3	11	272909;272910;272911;272912;288180;288181;290652;290653;290666;353256;353257	EED95402.1;EJK59682.1	predicted protein, partial [Thalassiosira pseudonana CCMP1335]	1.01782	11	0.860014	0.962201	1.14775	10	0.0181982	0.13721	1.06304	11	0.413859	0.721888	1.15201	11	0.0624938	0.273981	0.994588	11	0.970703	0.994112	1.04633	11	0.750925	0.940003	1.06404	11	0.461354	0.831989	1.14211	11	0.211879	0.582262	1.05549	11	0.460154	0.821704	0.939322	11	0.408859
222	YP_009093479.1	193	20532.8	CSESPAFTK;SELLCGTDGLPHLVADGR;AVSTSANPSESEIIINVPLALK	1;1;1	3	15	196632;196635;196643;310896;310897;310898;310899;310900;310901;310902;310903;357476;357477;357478;357479	AIR76152.1	photosystem I subunit III (chloroplast) [Thalassiosira weissflogii]	0.633964	15	0.0001	0.00219734	0.63734	14	0.0001	0.00353298	0.562654	15	0.0001	0.00211861	0.586925	15	0.0001	0.00261133	1.2459	14	0.00019998	0.00553483	1.04561	13	0.260574	0.640232	1.10816	15	0.0638936	0.339258	0.998849	13	0.975202	0.995506	0.929921	11	0.00829917	0.110656	0.983009	14	0.441756
223	XP_002289659.1	1245	20343.3	IVMLGDSGVGK;GVILVYDVTNAK;AEMFCAEFGMEHLETSAK	1;1;1	3	7	9226;209231;258718;258719;258724;350617;350618	EED93196.1	predicted protein, partial [Thalassiosira pseudonana CCMP1335]	1.12794	7	0.493051	0.782799	1.33475	7	0.0175982	0.135521	1.07258	7	0.740526	0.908874	1.30908	7	0.0381962	0.200492	0.860033	7	0.336066	0.706289	0.775587	7	0.0685931	0.30336	0.947267	6	0.660634	0.912746	0.776571	7	0.0810919	0.347537	0.984646	7	0.886811	0.972144	0.843364	7	0.139986
224	XP_002289769.1	856	20263.7	VLEQLTGQQPVYSK;FEGVVLAK;LILNCCVGESGDR	1;1;1	3	10	145313;309027;309028;309029;309030;309032;309033;147054;236287;236289	EED93306.1	RL11A, ribosomal protein 11A 60S large ribosomal subunit [Thalassiosira pseudonana CCMP1335]	0.544781	10	0.00109989	0.013302	0.740209	9	0.00859914	0.0851409	0.394844	10	0.0001	0.00211861	0.498712	10	0.00239976	0.0280803	0.96742	9	0.510849	0.830187	1.11438	9	0.0632937	0.290353	0.702577	10	0.00459954	0.0559404	0.811032	10	0.0917908	0.364732	0.776002	10	0.0159984	0.164555	0.838249	10	0.0110989
225	EED93670.1	350	19571.9	EMIDFVSYYR;SHMVTATGLAK;KEMIDFVSYYR	1;1;1	3	25	194575;194576;194577;194584;194585;198694;198697;198698;198701;264898;264901;264903;264906;264907;267924;219172;219173;219176;219177;219178;219179;288193;288194;288200;290686	XP_002288234.1	predicted protein [Thalassiosira pseudonana CCMP1335]	0.881952	25	0.00419958	0.0358656	0.817609	23	0.00019998	0.00621317	1.01226	25	0.846815	0.939443	0.858943	25	0.00369963	0.0389867	0.71257	24	0.00029997	0.00719528	0.969888	24	0.726127	0.933183	0.86237	25	0.0029997	0.039996	1.1464	23	0.00019998	0.00473637	1.12583	25	0.0334967	0.252276	1.18761	25	0.00019998
226	EJK74743.1	1757	19481.4	VIHFVNPK;LGATNIPGIEEVNLFK;LGATNIPGIEEVNLFKEDGK	1;1;1	3	10	175907;175911;175912;323546;323550;323554;323555;323556;323557;362610	-	hypothetical protein THAOC_03563 [Thalassiosira oceanica]	1.10019	10	0.248675	0.557431	0.805204	10	0.0465953	0.263213	0.855022	9	0.00889911	0.0616435	0.652202	10	0.00049995	0.0091001	0.868605	10	0.151285	0.477585	0.699909	10	0.0147985	0.102451	0.80001	8	0.00029997	0.00794038	0.591764	10	0.00019998	0.00473637	0.849083	10	0.0735926	0.387856	1.38606	10	0.00079992
227	XP_002294929.1	464	19367.7	SLTSNFFGR;FVTTIGVDYR;LLMVGDSSCGK	1;1;1	3	6	104798;104801;104802;104805;148228;231283	EED87709.1;EJK73035.1	predicted protein, partial [Thalassiosira pseudonana CCMP1335]	1.95799	6	0.00149985	0.0169983	1.73429	6	0.00069993	0.014666	1.69755	6	0.0384961	0.1742	1.54961	6	0.0162984	0.113396	1.50744	5	0.00039996	0.00827044	1.28745	6	0.0288971	0.166714	1.363	5	0.00129987	0.021079	1.17964	6	0.0337966	0.193124	0.972381	5	0.652935	0.908812	1.09579	6	0.39836
228	EED94570.1	428	17244.2	LVAIIQNPR;ILNTNVEGK;YSQVFAQNFDAK	1;1;1	3	9	103490;103491;103492;103495;186492;282743;282744;282746;282751	XP_002287127.1	RS18, ribosomal protein 18 40S small ribosomal subunit [Thalassiosira pseudonana CCMP1335]	0.397385	9	0.00019998	0.00367718	0.873296	8	0.00349965	0.0460319	0.284216	9	0.00049995	0.00714611	0.65766	9	0.009999	0.0786821	1.1946	9	0.00089991	0.0149902	1.19281	9	0.010399	0.0817386	0.902819	9	0.446355	0.816406	0.908912	9	0.478752	0.826921	0.759111	9	0.0291971	0.232543	0.460158	9	0.0001
229	EED93535.1	1319	17139.3	TPPSWCK;GLTPSQIGVILR;KGLTPSQIGVILR	1;1;1	3	8	151038;174635;174636;174641;276173;276174;276175;276176	XP_002289998.1	RS13, ribosomal protein 13 40S small ribosomal subunit [Thalassiosira pseudonana CCMP1335]	0.554735	8	0.0231977	0.124411	0.88428	6	0.150285	0.510007	0.399904	8	0.0146985	0.0912829	0.653658	8	0.0568943	0.260009	1.16854	8	0.00579942	0.0554955	0.980072	8	0.883112	0.974912	0.894847	8	0.334367	0.734414	0.748314	8	0.0116988	0.0927661	0.782808	8	0.0183982	0.18196	0.654163	8	0.00969903
230	EED88221.1	1037	14480.2	GWTEAMQLMK;EEGVVTLPSGLLYK;GKEEGVVTLPSGLLYK	1;1;1	3	7	241473;241474;241486;245138;297046;345792;345794	XP_002294387.1	predicted protein, partial [Thalassiosira pseudonana CCMP1335]	1.2267	7	0.00459954	0.0381953	0.774211	7	0.0356964	0.217065	1.50254	6	0.00079992	0.0100046	0.838481	6	0.0167983	0.115537	1.04272	7	0.756224	0.942616	1.22101	6	0.170683	0.519307	1.24188	7	0.0792921	0.384639	1.3107	7	0.133187	0.446436	1.16964	7	0.0381962	0.267522	1.59661	7	0.00319968
231	XP_002296774.1	1155	14117.6	LTLDFHTNK;IAGFTTHLMK;IIDEIAITPSK	1;1;1	3	10	212472;223632;239102;239103;239104;239105;239106;239107;239108;239109	EED86975.1	predicted protein, partial [Thalassiosira pseudonana CCMP1335]	0.497963	10	0.0001	0.00219734	0.780858	10	0.00149985	0.0264973	0.469845	9	0.0001	0.00211861	0.684345	10	0.00229977	0.0272644	1.00599	10	0.884912	0.978461	0.861838	10	0.089891	0.359564	0.88172	9	0.0360964	0.224822	0.792198	10	0.0559944	0.269492	0.923214	10	0.121788	0.478642	0.688965	10	0.00019998
232	EED91510.1	1596	13435.2	IEQLLI;IKIEQLLI;NVPYVFVPSK	1;1;1	3	12	32560;32578;32579;32580;32581;181034;181035;181036;227299;227302;227303;227310	XP_002291403.1	L7Ae, ribosomal protein 7Ae 60S large ribosomal subunit [Thalassiosira pseudonana CCMP1335]	1.99291	12	0.0001	0.00219734	1.32477	12	0.00109989	0.020433	1.763	12	0.0001	0.00211861	1.20565	12	0.00209979	0.0253948	0.828516	12	0.00039996	0.00827044	0.773693	12	0.0001	0.00239976	0.751533	12	0.00069993	0.0143167	0.700386	12	0.00029997	0.00642793	0.909987	12	0.0915908	0.418435	1.38901	12	0.00039996
233	XP_002292096.1	1381	11850.2	SEVEYLAMLAK;MVLIASNCPPLR;KSEVEYLAMLAK	1;1;1	3	18	19130;19134;251065;251084;254390;254392;254396;254398;254402;254403;206900;206930;206931;211008;320411;322243;322245;322246	EED90947.1	predicted protein [Thalassiosira pseudonana CCMP1335]	0.57529	17	0.0001	0.00219734	0.707411	17	0.0001	0.00353298	0.450968	18	0.0001	0.00211861	0.549637	18	0.0001	0.00261133	1.17769	18	0.0162984	0.117754	1.22319	18	0.00039996	0.00742194	1.01485	18	0.865613	0.975277	1.06241	18	0.445055	0.812475	0.877023	18	0.0283972	0.231289	0.88323	16	0.00219978
234	YP_004072578.1	249	7308.97	LGEILRPLNAEYGK	1;1;1	3	6	307017;307019;307020;307021;307022;307024	AIR75398.1;XP_002297544.1;EED86184.1;AIR75827.1;YP_009093427.1;YP_874510.1;YP_009093154.1;AIR76100.1;sp|A0T0P8.1|PSBH_THAPS;ABK20733.1;ADB27532.1;AIR75539.1	photosystem II reaction center protein H (chloroplast) [Thalassiosira oceanica CCMP1005]	0.440126	6	0.00109989	0.013302	0.838721	6	0.286171	0.661204	0.257857	6	0.00069993	0.0090041	0.50499	6	0.0154985	0.109522	1.29072	6	0.0319968	0.188112	1.21907	6	0.0722928	0.311309	0.68762	5	0.0153985	0.131987	0.76231	6	0.0508949	0.253069	0.638693	6	0.00629937	0.0929415	0.531913	4	0.0001
235	CAI44219.1	919	3421.61	SIPFLTVPEK	1;1;1	3	3	222769;222770;222771	CAA06733.1;XP_002290650.1;EED92402.1	fucoxanthin chlorophyll a/c binding protein, partial [Cyclotella cryptica]	0.268707	3	0.0001	0.00219734	0.599702	3	0.00149985	0.0264973	0.185815	3	0.0001	0.00211861	0.415905	3	0.00059994	0.010199	1.08506	3	0.530247	0.843246	1.27172	3	0.139586	0.468556	0.79494	3	0.0805919	0.386841	0.937763	3	0.644836	0.908501	0.734938	3	0.00989901	0.124603	0.47298	3	0.0001
236	ABO61504.1	155	43401	LSVNMVPFPR;GHYTEGAELVDAIMDVTR;FPGQLNCDLR;ASICDVPPTGMK;IMTTYSVVPSPK;NSGYFVEWIPNNLK;MSSVFIGNSTCIQEAWK	1;1;0;1;1;1;1	6	51	144708;144709;144711;144715;144716;149720;149723;149724;149726;149727;149753;149754;149755;162795;318785;318786;318787;318788;318790;318791;318792;344604;344606;344607;344608;345659;345660;345661;345666;345667;345668;163562;163563;163564;163567;163568;163569;163571;255447;255448;255454;255455;255456;255462;258570;258571;258582;264985;264990;264992;264995;267960;319742;319743;319752;319753;343425;…	ABO61502.1;ABO61503.1	beta tubulin, partial [Thalassiosira sp. CCMP1987]	0.707857	51	0.0001	0.00219734	0.918158	49	0.0115988	0.103471	0.765694	51	0.0001	0.00211861	0.959425	51	0.356864	0.70667	1.04476	51	0.386761	0.752199	0.900772	49	0.0544946	0.261574	1.16129	51	0.0001	0.0036731	0.958308	50	0.40396	0.780179	1.04994	48	0.131187	0.493922	0.833949	51	0.0001
237	AIR75402.1	295	54324.4	EAYPGDVFYLHSR;ATLIIYDDLTK;LVESMAPGIISR;QMSLLLR;INIRPDEISSIIR;ASTVAQVVNLLDEK;SVCEPLQTGITSIDAMIPIGR;VYGLDQVMSGELLEFEDK	1;1;0;1;1;1;0;0	5	14	17871;250028;250036;250041;250042;250044;250050;250052;250053;250054;250055;250059;250061;250066;304524;304525;304530;304532;304540;304543;304544;304545;304546;304547;304548;304549;304551;304552;336512;18892;80990;253655;253656;253659;253660;253661;253664;253668;253669;253670;253671;253672;253675;253676;253679;253680;253681;253682;253683;306669;306670;36275;38230;180699;180701;180703;180704;18071…	AIR75543.1	ATP synthase CF1 alpha subunit (chloroplast) [Cyclotella sp. L04_2]	1.06803	12	0.0819918	0.290274	1.02552	14	0.70383	0.895081	0.871613	13	0.0233977	0.124836	0.912573	14	0.371263	0.717059	1.1833	13	0.00389961	0.0420084	2.46166	14	0.0001	0.00239976	1.05936	13	0.281272	0.700262	2.30325	14	0.0001	0.00260844	0.877624	13	0.00749925	0.103043	1.0431	14	0.40386
238	EED93318.1	1580	61027.5	QFVNFVR;ASFDLSMTDISEIAR	1;1;0;1;1;0;1;1	6	6	71651;270429;270441;270442	XP_002289781.1	probable amp deaminase, partial [Thalassiosira pseudonana CCMP1335]	1.05457	3	0.688031	0.884845	1.02074	3	0.837416	0.940788	0.808076	4	0.132687	0.397918	0.749486	4	0.233077	0.593406	1.41087	4	0.00819918	0.0712576	1.179	4	0.324068	0.706854	1.17586	4	0.140186	0.521353	0.98869	4	0.950705	0.990212	0.804507	3	0.0475952	0.311532	1.10945	4	0.360164
239	EED92326.1	82	65761.8	AYADVFTK;FFVGGNWK;VINDEFGIK;VPTANVSVVDLTAR;LVSWYDNEAGYSQR;AACYNIIPSSTGAAK	1;1;0;1;1;0	4	12	163344;163345;243303;176088;198875;198876;198888;224449;224450;224458;276383;276385;276392;320534;320535;300082;300083;300087;300088;300092	XP_002290574.1	triosephosphate isomerase/glyceraldehyde-3-phosphate dehydrogenase precursor [Thalassiosira pseudonana CCMP1335]	0.994712	12	0.918408	0.980173	1.36216	12	0.00259974	0.0374779	0.897342	12	0.00869913	0.0614397	1.2251	9	0.00169983	0.0212715	1.10225	11	0.00749925	0.0674558	0.833708	12	0.00229977	0.0279702	0.993766	12	0.921908	0.984439	0.79311	12	0.00969903	0.0812012	0.928912	12	0.178882	0.571914	0.711486	11	0.0001
240	EED93403.1	109	46955.5	VSVGLDVASSEFK;NQYDLDFK;VNQIGSISESIDAVK;DSSLLLSGDELIAFYK;EVGKDVQIVGDDLTVTNPVK;HYADIAGNPTPDVLPVPCFNVINGGEHAGNK	1;1;0;1;1;0	4	16	267834;267835;267838;267839;267840;267842;267854;269602;305391;305392;305393;305394;305395;305404;305405;329131;329133;362258;362260;362261;362262;362263;362265;369555	XP_002289866.1	alpha enolase [Thalassiosira pseudonana CCMP1335]	1.80164	16	0.0001	0.00219734	1.59936	16	0.0001	0.00353298	2.17262	16	0.0001	0.00211861	1.97356	16	0.0001	0.00261133	0.640592	16	0.0001	0.0035271	1.00302	15	0.950905	0.987099	0.798297	16	0.0001	0.0036731	1.31472	16	0.0001	0.00260844	1.21499	16	0.0001	0.0049995	1.09398	16	0.123388
241	XP_002295282.1	1299	45405.9	GYQPNVGSTK;KGYQPNVGSTK;SMGSTVSAVLATAFK;VVVTGMGITSCLGNTLEDVK;VCAILGQGGTSIPDIVETVEAVK;AMSNSFGFGGTNCALVFDKYEE	1;1;0;1;1;0	4	14	202982;202983;202989;202992;293304;293778;293780;350913;350915;350916;350917;350918;351628;351629;360656;360659;362532;362847	EED87348.1	predicted protein [Thalassiosira pseudonana CCMP1335]	1.46864	13	0.0001	0.00219734	1.32658	13	0.00019998	0.00621317	1.19474	14	0.0788921	0.280246	1.1644	14	0.121088	0.403328	1.15286	13	0.009999	0.0813946	1.37375	12	0.0001	0.00239976	1.11754	14	0.209079	0.621486	1.37462	13	0.0001	0.00260844	0.855636	13	0.0625937	0.359391	1.03892	14	0.641336
242	XP_002290729.1	160	90179.9	AMLGSVER;FADFGVLHR;NELSGALSGLTR;MFAVLCEHYGGK;LHAEGFYADVDLSK	1;1;0;1;1	4	8	59967;59981;114298;114312;114313;114319;163009;163017;281718;306052	EED92481.1	predicted protein [Thalassiosira pseudonana CCMP1335]	0.962272	8	0.69773	0.886359	0.954173	7	0.260174	0.638561	0.867353	8	0.324768	0.654862	0.765991	7	0.0279972	0.161246	0.762439	8	0.0848915	0.346303	0.578153	8	0.00259974	0.0301905	0.72327	8	0.0248975	0.177839	0.491327	7	0.0001	0.00260844	0.953189	8	0.652835	0.908812	1.06411	8	0.309869
243	EJK69743.1	256	44796.4	NICTEAGLFAIR;VALDMTTLTIMR;GVLLYGPPGTGK;RGDIDFESVVK;EVIELPLTNPELFIR	1;1;0;1;1	4	12	205277;205290;205347;205348;209386;209393;209394;209402;209403;213400;229298;229300;229303;229304;229306;253344;292660	EED89574.1;XP_002293113.1	hypothetical protein THAOC_08972 [Thalassiosira oceanica]	0.878132	12	0.049995	0.215014	1.0108	12	0.864814	0.949593	0.696742	12	0.00109989	0.0129471	0.818469	12	0.0089991	0.0727192	1.21884	10	0.00019998	0.00553483	1.04929	12	0.59664	0.886111	0.93657	12	0.347865	0.741202	0.878483	12	0.20298	0.568497	0.877058	11	0.0252975	0.21892	0.854433	11	0.00189981
244	XP_002290667.1	71	97762.4	HFNFAMSK;GVLLTGPSGCGK;GVLFYGPPGCGK;VINQILTEVDGVGAR;LDQLIYIPLPDLESR;GPELLTQWFGESEANVR;KAPLDPSIDIEVLAR;AASPCILMFDEMDSIAK	1;1;0;1;0;1;1;1	6	12	189162;226383;226386;250627;250631;250632;250637;256250;292957;313664;313672;313675;313676;314778;314779;339385;339386	EED92419.1	cell division cycle protein 48 [Thalassiosira pseudonana CCMP1335]	0.97997	11	0.578542	0.837291	0.943492	12	0.371363	0.702199	0.838965	12	0.0176982	0.101836	0.864856	12	0.0688931	0.291421	0.94591	12	0.594941	0.882356	0.9663	12	0.69873	0.917764	0.948906	11	0.435656	0.807512	0.916038	12	0.279672	0.660321	0.978736	11	0.612839	0.895673	0.964175	11	0.40166
245	EED94317.1	571	37144.2	RHDLDLVVR;YPENFFILR;GVSFTFGGDVVR;ICGDIHGQYTDLLR;AHQVVEDGYEFFAGR;IKYPENFFILR;EVLLSQPMLLELGAPIK;KPGTPVDISVQDATNLCNQAR	1;1;0;1;0;1;1;1	6	10	133093;157043;157050;170169;170173;170177;170178;271328;271336;283199;283200;283203;283204;324585;286466;286470;336024;337191;358608	XP_002288881.1	serine threonine protein phosphatase [Thalassiosira pseudonana CCMP1335]	1.51481	9	0.00049995	0.00763483	1.22625	10	0.0148985	0.120391	1.43974	6	0.00219978	0.0225102	1.25318	10	0.0179982	0.120121	0.857758	10	0.0357964	0.20436	0.72534	9	0.00339966	0.0373133	0.917282	9	0.0325967	0.214015	0.850274	9	0.0136986	0.10317	1.02714	10	0.516148	0.860247	1.06533	9	0.321868
246	AAV67002.1	893	15372.1	VADLVGCK	1;1;0;1;0;1;1;1	6	8	128790;356195;356197;356199;356201;356202;356203;356204;356210;304217;304219;304220;304221;304225;306296;306299;306304;336360;336361;336362	AAV67001.1	nitrate reductase, partial [Thalassiosira weissflogii]	1.15875	1	0.717828	0.901412	1.10228	1	0.728527	0.902269	1.3862	1	0.519948	0.796959	1.32923	1	0.429957	0.775558	0.500505	1	0.0861914	0.347664	0.493086	1	0.119288	0.426029	0.616569	1	0.145285	0.523162	0.609585	1	0.245275	0.625148	1.19382	1	0.471553	0.830024	1.04603	1	0.883412
247	XP_002294422.1	337	87390.9	EVAAIAIGR;AGLGFAAFAELR;MSISNMAIEAGAR;HLVHEVTSPQAFEGLR;VADGVHAMVVPGSGLVK;RPDCTLSTVDHNVPTTDR;DIAPTVTWGTSPQDAMPVDGIVPR	1;1;0;1;0;1;1	5	9	69055;164653;164659;201826;298728;298734;298735;314669;329913;356301;356871	EED88256.1	3-isopropylmalate dehydratase [Thalassiosira pseudonana CCMP1335]	0.745932	7	0.0069993	0.050451	1.0379	9	0.693831	0.891914	0.486132	9	0.0001	0.00211861	0.848982	9	0.111689	0.38409	0.956808	9	0.69933	0.920333	0.785725	9	0.10149	0.387038	0.849976	7	0.00849915	0.0874198	0.640662	9	0.0009999	0.0162146	0.842241	9	0.059694	0.354618	0.634037	9	0.00159984
248	AIR75573.1	59	34260.9	GQVYPTGEK;YLTYPFYAGGNR;AIEIEAPQGVLPNSVFEIEIK;GVFISPYSTEFDNILVVGPIAGK;QQISADGKPADLNVGGILILPK	1;1;0;1;0	3	5	183719;183720;183722;183725;256941;219464;219480;219481;219482;219492;358940;358942;362121;364497;364499;364500	-	cytochrome f (chloroplast) [Cyclotella sp. WC03_2]	0.567841	4	0.00059994	0.00858009	0.67709	5	0.00209979	0.0329028	0.45868	4	0.0009999	0.011926	0.553104	5	0.00019998	0.00462005	0.650496	5	0.00039996	0.00827044	0.843625	5	0.174283	0.524179	0.570498	5	0.00079992	0.0153176	0.773497	4	0.039696	0.214573	0.881223	5	0.158584	0.541654	0.959713	5	0.630437
249	EED92139.1	1447	130346	GLSLMLGSMR;GVYSSPDSLLQR;EFNTGSFPK;ATIPSLELSDLK	1;1;0;1	3	4	124700;194359;194360;196695;196697;196698;257718	XP_002290387.1	hypothetical protein THAPSDRAFT_22863 [Thalassiosira pseudonana CCMP1335]	0.996233	4	0.968903	0.987536	0.834182	4	0.318868	0.680475	0.84605	3	0.325067	0.654862	0.950952	3	0.718728	0.905182	1.26234	4	0.0457954	0.235388	1.27585	4	0.0592941	0.280129	1.24035	4	0.140486	0.521391	1.28237	4	0.0439956	0.232235	0.978308	4	0.80212	0.94863	1.02238	3	0.848315
250	EED86328.1	431	61102.8	LHPPDDGFR;TLLVGMGSTLFR;GSCVFAQTSVMR;SHFLPIFEEAK	1;1;0;1	3	3	111930;191564;203829;263877	XP_002297365.1	hypothetical protein THAPSDRAFT_bd1658 [Thalassiosira pseudonana CCMP1335]	1.0399	3	0.763824	0.918219	0.936397	3	0.507049	0.797994	1.15308	3	0.649635	0.875029	1.0314	3	0.89911	0.970516	0.896618	3	0.755724	0.942616	1.02789	3	0.885811	0.974912	1.01699	3	0.885911	0.978638	1.18741	3	0.313369	0.701572	1.11333	3	0.705729	0.925659	1.12006	3	0.338466
251	EED87185.1	756	50036.3	EACMDAYDKPIHF;MAVIGGGVIGLEMGSVWSR;TAVPSIYAIGDCIDGPMLAHK;NIIIATGSEVTPLPPVPVDNAGGK	1;1;0;1	3	6	309722;309723;313994;313996;315825;356705;356707;357190;360747	XP_002296489.1	precursor of hydrogenase lipoamide dehydrogenase, partial [Thalassiosira pseudonana CCMP1335]	1.46446	6	0.00279972	0.027419	1.27451	5	0.0039996	0.0518509	1.12296	6	0.40136	0.713224	0.962819	6	0.736926	0.912048	1.22168	6	0.186681	0.527541	1.11899	6	0.547245	0.859515	0.982484	6	0.90281	0.980924	0.910628	6	0.585241	0.882274	0.822806	6	0.0139986	0.150883	1.16947	6	0.156884
252	XP_002289996.1	869	40372.5	VSMIICDDGNYPEIWR	1;1;0;1	3	2	317712;317713;319590	EED93533.1	aliphatic amidase [Thalassiosira pseudonana CCMP1335]	1.58091	3	0.0149985	0.0903923	1.291	3	0.039596	0.233941	1.91485	3	0.040496	0.179197	1.59293	3	0.0260974	0.154696	1.56459	3	0.019898	0.137679	1.72772	3	0.00719928	0.064152	1.91201	3	0.00269973	0.037965	2.21021	3	0.00079992	0.014256	1.20519	3	0.388961	0.773351	1.1616	3	0.215178
253	XP_002291121.1	1217	17377.6	GIVGNIISR;MLGATNPLASEPGTIR;TYIMIKPDGVQR;KMLGATNPLASEPGTIR	1;1;0;1	3	9	76447;76448;76449;265083;265084;268101;268121;268130;283360;283361;283362;285938;329247	EED91228.1	nucleoside diphosphate kinase [Thalassiosira pseudonana CCMP1335]	1.50824	9	0.0212979	0.118453	1.2291	9	0.0313969	0.200628	1.38833	9	0.0385961	0.174215	1.14123	9	0.194681	0.537235	1.21321	8	0.0164983	0.118722	1.24464	8	0.00929907	0.0760833	1.01925	8	0.660934	0.912746	1.29063	9	0.00189981	0.0271401	0.848872	7	0.00839916	0.111165	1.05275	7	0.269973
254	EED89904.1	229	112302	VAATPESVSK;AFDVRPVTK;FFAGQMTAAGK;DILSVILGGYGTK;GQTYDALSSQANITGYR;QCEEVDIVITTAAIPGR;LPTTSSSLYSNNISK;LVKPGFNVLIEK;VLVVGTGVAGLAAIQTAK	1;1;0;0;1;1;1;1;1	7	14	186781;198298;198300;198301;198302;222133;225971;225982;267471;267472;302661;302662;302674;306356;311631;311633;317501;318378;318380	XP_002292708.1	hypothetical protein THAPSDRAFT_8524 [Thalassiosira pseudonana CCMP1335]	0.861925	14	0.0843916	0.295863	0.834773	13	0.00719928	0.074989	0.772573	14	0.0266973	0.136209	0.788359	14	0.0280972	0.161246	1.06228	14	0.254275	0.615666	0.974089	14	0.766223	0.943972	0.995314	14	0.937306	0.987847	0.922305	14	0.362764	0.741354	0.933283	14	0.122888	0.480865	1.06774	13	0.154585
255	XP_002294462.1	445	179710	GMVQGCVLPQFYK;GACGGDGISGDGAGIMTQIPWK;LVSSIGIGTVACGVAK;SDSANLDAVFELMTK;VCHLNTCPVGVTSQK;AQADVIQISGGDGGTGASPLSSIK	1;1;0;0;1;1	4	7	132035;245786;354074;301397;315176;315180;321939;321940;356711;356712	EED88296.1	glutamate synthase [Thalassiosira pseudonana CCMP1335]	0.861864	7	0.0669933	0.257953	1.01574	7	0.89781	0.961863	0.94134	7	0.436256	0.738438	1.01627	6	0.810719	0.936624	0.686785	7	0.0469953	0.238154	0.593687	7	0.0438956	0.224597	0.767932	7	0.0343966	0.221121	0.663011	7	0.0476952	0.243205	1.04858	6	0.311069	0.712628	0.879275	7	0.266673
256	XP_002292926.1	441	17132.2	EYWNPEATGKFAGNASITSEHFNTAGRAYSSDQIYDYLAQTVAYTK	1;1;0;0;1;1	4	11	119040;282195	XP_002292926	hypothetical protein THAPSDRAFT_24250 [Thalassiosira pseudonana CCMP1335]	6.2e-06	1	0.257715	0.549632	1.1634	1	0.119299	0.851821	0.413119	1	0.286871	0.14669	1.00871	1	0.61139	0.114426	0.631032	1	0.00358464	0.516012	0.957519	1	0.112216	0.711551	0.733668	1	0.311168	0.728116	0.892531	1	0.779034	0.951711	0.115319	1	0.12224	0.11533	0.911888	1	0.100424
257	EJK70025.1	1090	37675.9	IFQMGLK;VNTISAGPLK;AVEADYGK;VIPGYGGGMSSAK;FGPIMNDGGNMLSLTYIASEK;TFIEYAIDYSK;AASAIGKEPGQK;GYLAASSASAYSAVSLLQK;KGYLAASSASAYSAVSLLQK;ANAPLAQDLYNDDVGNSAMYLCSSMAR	1;1;0;0;1;0;0;0;0;1	4	9	138878;189782;189783;228877;228888;244462;244463;244464;244465;248000;248001;248005;262999;357628;358217;358221;358747;270075;270076;270077;270092;270093;316671;316673;289735;289738;289742;289743;338599;359617;365770	-	hypothetical protein THAOC_08655 [Thalassiosira oceanica]	1.30565	8	0.00409959	0.0356882	1.19438	7	0.00249975	0.0372277	0.881251	9	0.379062	0.695755	0.72865	8	0.00109989	0.0154844	1.69253	9	0.00019998	0.00553483	1.68134	9	0.00019998	0.0040905	1.14158	9	0.0719928	0.364009	1.146	9	0.184882	0.53762	0.644832	8	0.0001	0.0049995	1.05837	8	0.344566
258	XP_002293604.1	1496	62111.6	GMDIFLSLYNLHHDER;LYPEPPLLIR;AVYSALVEAEHR;GLIPADPETWSVR;SFLVISDPVQAK;DYANVKDPSLLR	1;1;0;0;1;0	3	3	52111;160931;200326;224149;261253;277962	EED89340.1	cytochrome P450 [Thalassiosira pseudonana CCMP1335]	0.810195	3	0.156084	0.435393	0.973315	3	0.787521	0.91766	0.855977	3	0.592241	0.840808	1.0353	3	0.838116	0.948076	0.771663	3	0.210279	0.557953	0.853855	3	0.294671	0.674819	0.847731	3	0.181382	0.573791	0.943864	3	0.755724	0.94176	1.08791	3	0.624238	0.900343	0.859141	3	0.209779
259	EJK75978.1	144	154870	VLDIYER;LQNIASMR;APMFSFTR;YCIIEVNAR;GMNQPCIDLR;VLLVGSGGLSIGQAGEFDYSGSQCIK;TLHANFISLATR;ATGYPLAYVATK;LGSSMLSVGEVMAIGR;AFATSNQILIDQDLR;HLGIVGECNIQYALNPK	1;1;0;0;0;0;1;0;1;1;0	5	16	71043;71044;77373;88492;137691;158456;158457;163511;163514;163521;194323;200137;200138;251275;260938;264048;264097;267216;267217;279829;279830;279834;279835;279836;279883;341371	-	hypothetical protein THAOC_02285 [Thalassiosira oceanica]	0.854773	25	0.0126987	0.0797321	1.00804	24	0.842616	0.942516	0.821733	25	0.0160984	0.0963229	1.02364	24	0.653735	0.891065	0.94383	24	0.363364	0.732621	0.893536	24	0.144286	0.47654	0.935392	21	0.174583	0.563128	1.00141	24	0.990401	0.996461	0.996642	25	0.934807	0.984899	0.852895	25	0.00349965
260	EJK48596.1	1102	31439.8	DGLHVLNIGK;FAHYTGSQSIAGR;FTPGTFTNQITK;EEDIQMMLSAGVHTGTR	1;1;0;0	2	5	206769;206770;206771;212882;212901;271064;271065;271073;306682;306686;306687	-	hypothetical protein THAOC_32592 [Thalassiosira oceanica]	0.915956	10	0.10029	0.327396	0.916535	11	0.167583	0.53419	1.02555	10	0.733927	0.905344	1.0699	10	0.318868	0.678395	0.753512	10	0.00589941	0.0558581	0.618434	11	0.00759924	0.0664011	0.837488	10	0.0519948	0.29156	0.693923	11	0.0215978	0.144521	1.1289	10	0.0319968	0.245848	0.962451	11	0.484652
261	EJK49131.1	715	124973	MPLIGVFR;VLQLAQGMDFR;ANYQLSELVK	1;1;0	2	3	7974;81804;182138;230827	-	hypothetical protein THAOC_32027 [Thalassiosira oceanica]	0.66549	3	0.0232977	0.124577	1.15748	4	0.39676	0.718198	0.692503	4	0.0423958	0.184878	1.11127	4	0.581142	0.862868	1.32218	3	0.0694931	0.307611	1.04444	4	0.683032	0.908525	1.25805	3	0.0805919	0.386841	1.09215	3	0.533047	0.859503	0.961206	4	0.580542	0.884074	0.67558	4	0.00989901
262	EJK46104.1	287	122349	QIDQGGHDALVGK;YGVQDSVGFAIR;NGGGPIEHLK	1;1;0	2	4	94751;267810;191777;191778;195450	-	hypothetical protein THAOC_35252 [Thalassiosira oceanica]	0.821806	4	0.509949	0.798326	0.86376	3	0.170683	0.537099	0.865023	4	0.374063	0.692595	1.09749	4	0.710129	0.90383	0.516958	4	0.00119988	0.0189349	0.482606	4	0.00429957	0.0437244	0.559856	4	0.0239976	0.174881	0.523951	4	0.0359964	0.20297	1.04551	4	0.843316	0.964516	0.820331	4	0.215878
263	XP_002286238.1	882	74313.4	TFEIPAQGVVLVR;LPNVSASIPQLDACVAELR;DYLTDLFPILELGTSAK	1;1;0	2	3	221293;326979;326983;339195;339196;339197	EED95879.1	hypothetical protein THAPSDRAFT_1456 [Thalassiosira pseudonana CCMP1335]	0.577814	3	0.128387	0.384568	1.13545	3	0.407559	0.723568	0.641713	3	0.10489	0.345982	1.28132	3	0.0831917	0.321009	0.953455	3	0.828217	0.95633	1.02042	3	0.936406	0.982511	1.06104	3	0.742526	0.936461	1.16464	3	0.454655	0.818378	1.07955	3	0.590741	0.889075	0.563871	3	0.0632937
264	EJK69203.1	1598	66506.3	AVVLFAK;EMGYLFGQYK;FCQSYMTELAK	1;1;0	2	5	111563;247069;247070;247071;250596;275358	-	hypothetical protein THAOC_09567, partial [Thalassiosira oceanica]	1.46726	4	0.00659934	0.0489383	1.47701	5	0.00069993	0.014666	1.02483	5	0.839416	0.939443	1.17089	5	0.0611939	0.271822	1.20581	5	0.0380962	0.212842	1.18414	5	0.167683	0.516256	0.98158	3	0.874113	0.977269	0.958665	5	0.755424	0.94176	0.803852	5	0.0243976	0.215273	0.905415	5	0.49905
265	XP_002294247.1	1351	64104.7	YAGSGSAPLPPDLLSWYR	1;1;0	2	3	315705	EED88602.1;EED88623.1;XP_002294268.1	predicted protein [Thalassiosira pseudonana CCMP1335]	1.91393	1	0.163784	0.446502	1.37049	1	0.272073	0.647276	1.30762	1	0.59964	0.845119	1.00493	1	0.990601	0.9995	1.63243	1	0.19968	0.541817	1.87627	1	0.158784	0.501806	1.1694	1	0.60244	0.901406	1.36872	1	0.439256	0.807621	0.757142	1	0.262574	0.664744	1.25225	1	0.466153
266	EED92762.1	1597	55997.9	VAWMDDLGVVR;GDLFAGGSMVGFLR;FCQSYMTELAK	1;1;0	2	15	176601;176602;176606;176607;176614;181812;181818;181819;181821;220743;220746;220747;224571;224576;224588;275358	XP_002289225.1	glutamate dehydrogenase [Thalassiosira pseudonana CCMP1335]	1.01632	13	0.69563	0.885651	1.22467	14	0.00259974	0.0374779	0.655275	14	0.0001	0.00211861	0.87757	15	0.0420958	0.212484	1.58428	15	0.0001	0.0035271	1.55846	15	0.0001	0.00239976	1.09307	15	0.242676	0.663378	1.08307	15	0.271773	0.653126	0.686685	14	0.0001	0.0049995	0.825815	13	0.0001
267	EJK50234.1	755	54094.1	TVQGLTGGIEHLLK;GTLGGTCLNVGCIPSK;TAVPSIYAIGDCIDGPMLAHK	1;1;0	2	3	290611;290612;314358;356705;356707;357190	-	hypothetical protein THAOC_30825 [Thalassiosira oceanica]	2.38646	3	0.00029997	0.00505183	1.66004	3	0.00949905	0.0905677	1.64453	3	0.0337966	0.160178	1.19538	3	0.359864	0.708598	1.12283	3	0.642836	0.90642	0.809746	3	0.357064	0.737906	0.814189	3	0.109589	0.459814	0.587396	3	0.00659934	0.0638646	0.732175	3	0.152485	0.529216	1.35938	3	0.0267973
268	XP_002296642.1	1070	52970.8	DIILAPGSIPFVPPGVTVDEK	1;1;0	2	4	354108;354109;354111;354112	EED87037.1	hypothetical protein THAPSDRAFT_24399 [Thalassiosira pseudonana CCMP1335]	1.76688	4	0.00059994	0.00858009	1.04126	4	0.679032	0.885656	1.69303	4	0.0049995	0.0407425	1.00029	4	0.9963	0.9995	1.4315	3	0.0276972	0.170059	1.75993	4	0.00269973	0.030563	1.32832	4	0.0131987	0.116769	1.79572	4	0.00369963	0.0408548	0.98405	4	0.826117	0.957703	1.65847	4	0.0009999
269	EJK58205.1	485	52326.5	TGATGFGAK;LTLADALVFADK;GLLFDTGGYNIK	1;1;0	2	5	130297;255683;255684;255685;255686;259970;259977;259978;259979;259980;259981;310498	-	hypothetical protein THAOC_21689 [Thalassiosira oceanica]	1.94651	5	0.00159984	0.0179063	1.1619	5	0.030197	0.196444	2.20325	5	0.00289971	0.0273423	1.32314	5	0.0049995	0.0476672	0.633209	4	0.00129987	0.0201592	0.503751	4	0.00029997	0.00574411	0.788689	4	0.0291971	0.196834	0.661571	5	0.0009999	0.0162146	1.2171	4	0.0227977	0.209367	1.64512	5	0.00909909
270	XP_002289278.1	328	51880.8	LGLFGLDK;VAIMPGSGTFGMEAVAR;GGFGYHTTMPTDGLR	1;1;0	2	8	24571;147052;277641;277647;277648;277650;280628;283408;311362;313364	EED92815.1	predicted protein [Thalassiosira pseudonana CCMP1335]	1.55947	7	0.0001	0.00219734	1.09272	8	0.408859	0.724448	1.42229	8	0.0136986	0.0862631	1.06096	8	0.356564	0.70667	1.18066	8	0.0972903	0.372394	1.333	8	0.00929907	0.0760833	1.17396	8	0.00259974	0.0377382	1.30444	7	0.0009999	0.0162146	0.987951	8	0.883112	0.972078	1.32253	8	0.0614939
271	EJK73166.1	327	43924.9	QFATDEHVMVIR;WSAIMDTYEK;GGFGYHTTMPTDGLR	1;1;0	2	3	225199;228976;248812;311362;313364	-	hypothetical protein THAOC_05227, partial [Thalassiosira oceanica]	1.33401	3	0.0729927	0.272134	1.18377	3	0.213879	0.58655	1.53646	3	0.0426957	0.185289	1.38329	3	0.0336966	0.182887	0.860688	3	0.270173	0.634519	0.916455	3	0.543946	0.859515	1.01675	3	0.887611	0.978714	1.10027	3	0.49875	0.838967	1.15488	3	0.156784	0.538572	1.10259	3	0.40376
272	XP_002287026.1	963	28487.1	HLGLNYDER;DIADIVAGSGNK;ILPSLMNECAK	1;1;0	2	8	219329;229529;229530;229542;229543;229548;229549;229550;255480;255488	EED96667.1	predicted protein, partial [Thalassiosira pseudonana CCMP1335]	0.560286	8	0.00059994	0.00858009	0.521581	8	0.00109989	0.020433	0.538936	8	0.00019998	0.00360164	0.449394	7	0.0001	0.00261133	0.799417	8	0.0274973	0.169409	0.71174	6	0.00119988	0.0177031	0.778743	7	0.00049995	0.0113913	0.669715	7	0.00239976	0.032478	1.05422	7	0.191281	0.590977	1.1133	8	0.0570943
273	EJK51044.1	473	526508	LISYDNTVSFNR;RADYDNYVLMTK	1;1	2	3	221163;221170;294247	-	hypothetical protein THAOC_29824, partial [Thalassiosira oceanica]	0.806691	3	0.447655	0.750395	0.883867	3	0.233077	0.60779	0.986455	3	0.963904	0.983376	1.05894	3	0.660634	0.891065	0.825563	3	0.209479	0.557475	0.920479	3	0.563944	0.866211	1.02926	3	0.807319	0.955652	1.17409	3	0.272573	0.654175	1.20015	3	0.0858914	0.414097	0.948109	3	0.857314
274	XP_002295889.1	989	453921	STTSPALFNR;IQFVGACNPPTDAGR	1;1	2	2	123908;260100	ACI64606.1	cytoplasmic dynein heavy chain-like protein [Thalassiosira pseudonana CCMP1335]	0.722695	2	0.451855	0.752535	1.03343	2	0.872413	0.953168	0.530814	2	0.172683	0.466063	0.804614	2	0.388061	0.732237	1.24471	2	0.378562	0.747339	1.15791	2	0.59974	0.886179	0.977846	2	0.912709	0.984139	0.9108	2	0.730127	0.936649	0.811498	2	0.225077	0.627168	0.713744	2	0.117188
275	EED94997.1	754	263515	TAEEVAALIR;AGLSHDADQLIPNLFR	1;1	2	2	117766;289995	XP_002287554.1	predicted protein [Thalassiosira pseudonana CCMP1335]	0.760083	2	0.313169	0.632859	0.99203	2	0.967803	0.988348	0.734798	2	0.343366	0.670014	0.964671	2	0.885811	0.965985	0.964611	2	0.890411	0.978479	1.02034	2	0.950905	0.987099	0.970414	2	0.886011	0.978638	1.03831	2	0.891011	0.973385	0.995263	2	0.978302	0.993761	0.79594	2	0.288571
276	XP_002292722.1	1433	236698	LGPYLLDLR;DLVVFPIEGLDLSR	1;1	2	2	113890;254229	EED89918.1	predicted protein [Thalassiosira pseudonana CCMP1335]	0.65915	2	0.137586	0.402484	1.04645	2	0.815018	0.930712	0.557632	2	0.10159	0.338195	0.934366	2	0.785321	0.930743	1.10393	2	0.691031	0.916788	0.992971	2	0.981702	0.994968	0.991613	2	0.966703	0.993867	0.88886	2	0.660034	0.916285	0.923556	2	0.645835	0.907766	0.667146	2	0.0939906
277	XP_002290924.1	178	185630	VLFSPTQNTLR;GVFAVYGISVDPR	1;1	2	3	181616;209151;209153	EED91031.1;EJK45326.1	DNA directed RNA polymerase i, alpha subunit [Thalassiosira pseudonana CCMP1335]	0.728199	3	0.0682932	0.260178	0.824233	3	0.235376	0.609051	0.731109	3	0.155984	0.441017	0.815407	3	0.40046	0.747028	0.920912	3	0.747425	0.941957	0.92384	3	0.671433	0.905303	0.950937	3	0.669333	0.917443	0.964298	3	0.79892	0.952951	1.0201	3	0.931007	0.983092	0.939773	3	0.59614
278	XP_002296892.1	318	169471	LPIEYIHR;VIALGPIEATR	1;1	2	3	108366;138488;138489	EED86620.1	predicted protein [Thalassiosira pseudonana CCMP1335]	0.930141	3	0.666833	0.875488	1.03903	3	0.70063	0.89478	0.795369	3	0.19978	0.504634	0.914827	3	0.49565	0.8109	1.36606	3	0.0484952	0.242341	0.979636	3	0.90171	0.977859	1.22117	3	0.221078	0.635535	0.88036	3	0.632337	0.906968	0.907918	3	0.313569	0.712656	0.905155	3	0.394161
279	EED87429.1	897	164019	STLLDPIPDVR;GLEPLLPIYQR	1;1	2	3	165622;188526;188531	XP_002295125.1	hypothetical protein THAPSDRAFT_270116 [Thalassiosira pseudonana CCMP1335]	0.532351	3	0.0226977	0.123943	0.935094	3	0.60464	0.858638	0.512482	3	0.0346965	0.163582	0.908002	3	0.459554	0.789606	0.938691	3	0.620038	0.893789	0.842849	3	0.260874	0.640232	0.942447	3	0.613839	0.902934	0.85138	3	0.271773	0.653126	0.998552	3	0.989401	0.997715	0.608062	3	0.149785
280	EED91192.1	312	141576	DVYAIGLK;YMAISDLCEALK	1;1	2	2	152078;282055	XP_002291085.1	hypothetical protein THAPSDRAFT_262874, partial [Thalassiosira pseudonana CCMP1335]	0.729108	2	0.247275	0.557431	0.855671	2	0.417658	0.728926	0.761216	2	0.39996	0.711787	0.889805	2	0.633337	0.886696	0.974113	2	0.914609	0.983599	0.856465	2	0.576742	0.876956	1.05713	2	0.788921	0.955652	0.941012	2	0.823618	0.960564	1.06849	2	0.70383	0.924065	0.886192	2	0.569743
281	ACI64410.1	1374	139562	GTLDLLGLHR;SVYDDLALTGSSIGWR	1;1	2	3	124295;124296;285667	XP_002295693.1;EJK47043.1	predicted protein [Thalassiosira pseudonana CCMP1335]	1.1293	3	0.376662	0.70046	1.10123	3	0.375762	0.704603	0.937612	3	0.732527	0.905344	0.932491	3	0.723128	0.905414	1.19119	3	0.211379	0.558373	0.97852	3	0.877512	0.974912	1.03844	3	0.826217	0.960291	0.848422	3	0.413059	0.790123	0.889027	3	0.49515	0.847486	1.02868	3	0.808119
282	EED86625.1	1560	135490	EAAPDMLFQMLLR;HEIPGGQYTNLLFQSK	1;1	2	4	249419;252836;252837;334549	XP_002296897.1;XP_002296990.1;EED86718.1	predicted protein [Thalassiosira pseudonana CCMP1335]	0.64494	4	0.0227977	0.124113	1.03362	4	0.79582	0.921509	0.627136	4	0.040396	0.179195	0.923384	3	0.539046	0.837691	1.47131	4	0.0039996	0.0425756	1.54471	3	0.0220978	0.136687	1.47481	4	0.00179982	0.0267742	1.43453	4	0.0254975	0.163329	1.0051	4	0.944806	0.985468	0.572649	3	0.00069993
283	XP_002288047.1	364	125124	AVALDVQANQIR;VPISDMTTVMTVVPK	1;1	2	3	188187;188238;312421	EED95490.1	predicted protein [Thalassiosira pseudonana CCMP1335]	0.931431	3	0.60174	0.849449	0.806228	3	0.0692931	0.329462	0.755294	3	0.20138	0.50598	0.65445	3	0.0507949	0.240875	1.08605	3	0.720728	0.931048	1.18059	3	0.609939	0.888261	0.926198	3	0.717128	0.931335	1.01015	3	0.969703	0.995506	0.859729	3	0.142186	0.519137	1.18502	3	0.166983
284	EJK56326.1	1773	118536	EIPTEVPWYR;VGPFNNPTETYR	1;1	2	4	185704;185717;212873;212877	-	hypothetical protein THAOC_23816 [Thalassiosira oceanica]	0.536676	4	0.00729927	0.0515815	0.765005	4	0.121788	0.449717	0.318636	4	0.00769923	0.055688	0.461387	4	0.0274973	0.160356	1.25812	3	0.117788	0.422114	1.26334	4	0.285171	0.665141	0.885006	4	0.292571	0.707832	0.926979	3	0.592941	0.887492	0.665559	4	0.00439956	0.0726533	0.741248	4	0.00879912
285	XP_002291490.1	1241	106902	EVAWVIYDEVHYMR;LFVPQDTKPQEAR	1;1	2	2	297093;300913	EED91597.1	helicase, partial [Thalassiosira pseudonana CCMP1335]	0.555674	2	0.0448955	0.200252	1.15937	2	0.444756	0.750421	0.45919	2	0.0372963	0.170484	1.04574	2	0.856514	0.953774	0.830308	2	0.452655	0.791062	0.930403	2	0.79542	0.947524	0.740667	2	0.232577	0.650059	0.812203	2	0.439856	0.807899	0.917262	2	0.615538	0.897724	0.508391	2	0.00629937
286	EED92490.1	1225	103173	AVFGSWMTPR;IMIPLIGSISEYK	1;1	2	2	147129;290283	XP_002290738.1	pyruvate phosphate dikinase [Thalassiosira pseudonana CCMP1335]	1.21483	2	0.468153	0.767084	1.04914	2	0.80332	0.924973	1.16384	2	0.649635	0.875029	1.01215	2	0.961504	0.988791	1.70227	2	0.0410959	0.222302	1.93571	2	0.0267973	0.157704	1.67902	2	0.0234976	0.173343	1.98944	2	0.0181982	0.126964	0.984211	2	0.928107	0.983092	1.15147	2	0.539846
287	XP_002289797.1	828	103143	VTPVPTALPIAR;GTDILLGGCPSTMAR	1;1	2	2	168411;249016	EED93334.1	predicted protein [Thalassiosira pseudonana CCMP1335]	1.02939	2	0.918408	0.980173	1.10913	2	0.592141	0.851338	0.880372	2	0.70223	0.895383	0.969775	2	0.90341	0.970516	1.2289	2	0.407159	0.760623	1.34358	2	0.429757	0.791773	1.09756	2	0.654735	0.910056	1.21923	2	0.462354	0.822123	0.896936	2	0.530947	0.86667	0.937766	2	0.765023
288	EJK62386.1	1100	98541.2	ELAAATALAR;GGAWMADCR	1;1	2	4	92689;92690;92691;103202	-	hypothetical protein THAOC_17004, partial [Thalassiosira oceanica]	0.631662	3	0.0145985	0.0894781	0.823704	4	0.0456954	0.258941	0.768922	4	0.362864	0.684837	0.746414	3	0.0480952	0.232353	1.04185	4	0.835816	0.961765	0.863232	4	0.333867	0.71437	1.14858	4	0.146485	0.523162	0.965315	4	0.808519	0.956199	1.0903	4	0.456754	0.821704	0.916843	4	0.425657
289	EED92404.1	377	96906.6	GDYWVLDITAR;YMGLPSDNVEGFR	1;1	2	4	40709;191033;234409;234442	XP_002290652.1	predicted protein [Thalassiosira pseudonana CCMP1335]	0.907635	4	0.339366	0.657567	1.2242	4	0.0951905	0.394744	0.850675	4	0.215278	0.523234	1.19874	4	0.0846915	0.323335	1.09537	4	0.592941	0.881571	1.02583	4	0.906809	0.977859	1.17345	3	0.193481	0.597171	1.11865	3	0.432457	0.803325	0.971224	4	0.751225	0.928673	0.751209	4	0.0107989
290	EJK68366.1	1454	96733	DTTAWTIGR;EGILEAYTGIIQGLK	1;1	2	4	102309;102314;310862;310874	-	hypothetical protein THAOC_10458 [Thalassiosira oceanica]	0.511786	4	0.00039996	0.00655207	1.08146	4	0.779422	0.913546	0.603076	4	0.00579942	0.0456103	1.30566	4	0.383162	0.726033	1.02132	4	0.827817	0.95633	0.812395	4	0.089791	0.359564	1.2469	4	0.0378962	0.232809	1.07408	3	0.610639	0.896243	1.19461	4	0.0352965	0.256101	0.494425	4	0.019598
291	EED88719.1	1188	95538	SCEYGALINAIK;TTVVDCLKDPDISIR	1;1	2	2	267956;325380	XP_002293710.1	gamma subunit of tetrameric clathrin adaptor complex AP2 [Thalassiosira pseudonana CCMP1335]	1.02379	2	0.935206	0.984222	1.0594	2	0.763524	0.913546	0.797511	2	0.484752	0.775406	0.836434	2	0.672133	0.892606	1.60479	2	0.255874	0.616841	1.13266	2	0.741426	0.939653	1.30558	2	0.216478	0.633888	0.932345	2	0.79622	0.952951	0.813722	2	0.565543	0.882021	0.986236	2	0.948605
292	XP_002289702.1	804	94096.9	IDQLVELIK;LPQMIEYTSEPLR	1;1	2	4	208100;254946;257959;257970	EED93239.1	beta subunit of clathrin adaptor complex AP2 [Thalassiosira pseudonana CCMP1335]	0.688886	4	0.00739926	0.0518812	1.08033	4	0.622738	0.859509	0.732469	4	0.222378	0.52862	1.16011	4	0.139586	0.44006	1.03141	4	0.870013	0.971876	0.903451	4	0.626337	0.896678	1.12633	4	0.20228	0.610492	1.00439	4	0.963704	0.994746	1.19845	3	0.143186	0.520675	0.575579	3	0.00149985
293	XP_002291034.1	172	93105.2	VVSVLEGGYGR;AAGAVQHAVDCVLVGR	1;1	2	3	137121;137122;264063	EED91141.1	histone deacetylase [Thalassiosira pseudonana CCMP1335]	1.21011	3	0.186981	0.471245	1.3488	3	0.0210979	0.152074	0.87147	3	0.416258	0.721888	1.01921	3	0.90171	0.970516	1.39824	3	0.19628	0.539097	1.29584	3	0.116788	0.419599	1.06002	3	0.658734	0.912746	0.988829	3	0.942806	0.987969	0.776092	3	0.115488	0.467067	0.887777	3	0.314869
294	XP_002291519.1	587	90227.7	GETAAHIIYSK;GGVIHVDVR	1;1	2	2	14064;82961	EED91626.1	predicted protein [Thalassiosira pseudonana CCMP1335]	0.715121	2	0.219878	0.514605	0.841009	2	0.367563	0.69868	0.897276	2	0.744226	0.909188	1.03211	2	0.90101	0.970516	0.793778	2	0.394661	0.755466	0.510897	2	0.0249975	0.150992	1.01906	2	0.925507	0.984439	0.6631	2	0.131087	0.444362	1.23762	2	0.215978	0.616103	0.898204	2	0.613739
295	EED93385.1	1555	89869.9	EVAVPMLTMR;WEMNALTQGR	1;1	2	3	140535;140536;159051	XP_002289848.1	predicted protein [Thalassiosira pseudonana CCMP1335]	0.981839	3	0.891111	0.973724	1.09353	3	0.373163	0.704603	0.936698	3	0.70183	0.895383	1.06203	3	0.676732	0.892606	0.826151	3	0.179482	0.518095	0.75965	3	0.10139	0.387038	0.820367	3	0.120688	0.483827	0.755655	3	0.135286	0.450121	0.986424	3	0.90011	0.975948	0.910195	3	0.419758
296	EED94204.1	939	89778.6	EALDCFLDFR;NAIIVTELPYQVNK	1;1	2	2	184544;310502	XP_002288768.1;EJK63339.1	DNA topoisomerase IV, ATP/GTP binding site [Thalassiosira pseudonana CCMP1335]	0.61558	2	0.0893911	0.305081	0.834675	2	0.347765	0.689554	0.827411	2	0.561844	0.828259	1.07571	2	0.771123	0.923642	0.776637	2	0.308369	0.682357	0.701049	2	0.20238	0.563277	1.04751	2	0.822518	0.95936	0.967981	2	0.90491	0.975726	1.27666	2	0.211879	0.615201	0.805677	2	0.311969
297	EED95457.1	1658	85381.2	GAAMSLLTEAYQSR;DLTIAPSQIQYLCEEAIR	1;1	2	6	237501;241245;241246;241247;333141;333158	XP_002288014.1	predicted protein [Thalassiosira pseudonana CCMP1335]	0.685477	6	0.0792921	0.284064	0.921319	6	0.29777	0.67169	0.546006	6	0.0306969	0.149017	0.73405	6	0.0125987	0.0941692	1.06231	6	0.686131	0.915957	1.156	5	0.114589	0.41551	0.883708	6	0.487051	0.850951	0.999707	4	0.9975	0.998455	0.827707	5	0.00969903	0.122945	0.795543	6	0.178582
298	EED95955.1	1211	85017.2	ALAQTYYGR;SNPCLIGEAGVGK	1;1	2	2	108927;260764	XP_002286314.1	member of the clp superfamily, regulatory gamma subunit, partial [Thalassiosira pseudonana CCMP1335]	1.04276	2	0.881512	0.972895	1.25487	2	0.237576	0.611847	0.777131	2	0.438056	0.739568	0.98216	2	0.941906	0.98106	1.37256	2	0.206079	0.554703	1.29871	2	0.348065	0.726371	1.07879	2	0.714729	0.930448	1.02707	2	0.920208	0.981536	0.806355	2	0.211979	0.615201	0.830002	2	0.383262
299	XP_002286821.1	742	84196.8	LLYFETSK;LNDLMLCIVK	1;1	2	2	190020;243290	EED96462.1	HSP90 domain-containing protein [Thalassiosira pseudonana CCMP1335]	0.90891	2	0.724028	0.901779	0.791559	2	0.225577	0.600075	0.904833	2	0.770223	0.919862	0.788182	2	0.330467	0.691639	0.973441	2	0.912409	0.983477	0.684122	2	0.175682	0.524179	1.00584	2	0.977302	0.993867	0.707537	2	0.20128	0.567182	1.0233	2	0.89511	0.975893	1.1612	2	0.484352
300	EED94486.1	1134	84149.5	YSGVLEAVR;LTGASIDTYLLEK	1;1	2	2	94789;283837	XP_002289050.1	predicted protein, partial [Thalassiosira pseudonana CCMP1335]	0.791276	2	0.387461	0.705971	0.821397	2	0.30387	0.671869	0.743013	2	0.359064	0.682866	0.77033	2	0.286371	0.653673	1.35627	2	0.221778	0.572891	1.05633	2	0.842316	0.962647	1.3255	2	0.193481	0.597171	1.04947	2	0.859714	0.969879	0.97342	2	0.877212	0.971084	0.99729	2	0.989101
301	XP_002290887.1	969	83295.9	ELLAQGVSTGR;QVFTGPPEQTR	1;1	2	2	135477;176271	EED92639.1	eukaryotic translation initiation factor 3 subunit 8, partial [Thalassiosira pseudonana CCMP1335]	0.514429	2	0.0282972	0.141643	1.07811	2	0.694831	0.891926	0.339933	2	0.0478952	0.202012	0.7387	2	0.465853	0.793788	0.783243	2	0.325467	0.700638	0.657186	2	0.133787	0.456956	0.551331	2	0.0113989	0.107802	0.459554	2	0.00869913	0.0763826	0.708301	2	0.0937906	0.426321	0.495496	2	0.00469953
302	EED91560.1	1673	80149.4	GVSVASQFR;VLSSNPLLESFGNAR	1;1	2	2	82506;260327	XP_002291453.1;EJK69525.1	predicted protein, partial [Thalassiosira pseudonana CCMP1335]	1.06788	2	0.809019	0.945781	0.941713	2	0.754725	0.912141	1.05761	2	0.875812	0.949632	0.941094	2	0.806419	0.936576	1.63255	2	0.0561944	0.269583	1.53065	2	0.146385	0.480828	1.65853	2	0.0268973	0.186931	1.62742	2	0.247575	0.625148	1.017	2	0.923508	0.981141	1.13129	2	0.562044
303	EED92712.1	714	79866.4	GLSPATSVWR;DLLASGVIAAEK	1;1	2	3	117976;236004;236023	XP_002289175.1	predicted protein [Thalassiosira pseudonana CCMP1335]	1.06678	3	0.784622	0.931534	1.15766	3	0.472453	0.76764	1.07253	3	0.830617	0.93867	1.17319	3	0.584142	0.862868	1.37348	3	0.0787921	0.335099	1.45013	3	0.270273	0.646126	1.43874	3	0.144786	0.523162	1.54283	3	0.314669	0.702734	1.0387	3	0.690231	0.918267	0.938455	3	0.588041
304	EED88672.1	1522	79707.5	NALQEFAK;GINLSEDIFAGYNNAIR	1;1	2	2	165297;305742	XP_002294317.1;EJK49176.1	predicted protein, partial [Thalassiosira pseudonana CCMP1335]	0.833245	2	0.531047	0.811428	0.965922	2	0.856114	0.948198	0.652692	2	0.225977	0.531101	0.763843	2	0.268873	0.632977	1.33559	2	0.245475	0.60247	1.1739	2	0.562844	0.866211	1.09783	2	0.654035	0.910056	0.969085	2	0.908109	0.975726	0.836461	2	0.29607	0.698698	0.895812	2	0.60424
305	EED88210.1	1162	79501.4	MAPDVESVANLSNLILEK;EVETLFHEFGHGLQHMLTR	1;1	2	3	342532;343496;344600	XP_002294376.1	oligopeptidase [Thalassiosira pseudonana CCMP1335]	1.07346	3	0.60204	0.849449	0.85391	3	0.261674	0.638561	1.27405	3	0.311069	0.636631	1.0078	3	0.951005	0.983864	0.934271	3	0.860014	0.969539	1.13272	3	0.70163	0.919297	1.13538	3	0.578042	0.889987	1.4171	3	0.167583	0.503589	1.1963	3	0.210579	0.615201	1.26591	3	0.184482
306	XP_002286654.1	866	79159.5	SLIDLHEK;VQCGTQFTSK	1;1	2	2	176118;228538	EED96295.1	cullin [Thalassiosira pseudonana CCMP1335]	0.978739	2	0.940206	0.984222	1.02765	2	0.887311	0.957446	1.00721	2	0.982002	0.991915	1.06504	2	0.79882	0.936548	0.807587	2	0.390461	0.755466	0.763205	2	0.331867	0.71437	0.866285	2	0.49865	0.85646	0.824946	2	0.474953	0.826803	1.05843	2	0.744526	0.926988	0.967735	2	0.876412
307	ACI64234.1	556	78358.1	GTLSPELLNR;RPYQILLLDEFEK	1;1	2	2	125735;317844	XP_002295517.1;EJK75153.1	member of the clp superfamily, large regulatory subunit, partial [Thalassiosira pseudonana CCMP1335]	0.661826	2	0.140186	0.407368	0.833923	2	0.344666	0.687641	0.658875	2	0.207779	0.514732	0.824031	2	0.428657	0.774764	1.21624	2	0.432057	0.781166	1.17479	2	0.560544	0.865488	1.25294	2	0.291971	0.707832	1.2353	2	0.431957	0.803225	1.0201	2	0.908809	0.977429	0.837734	2	0.409459
308	XP_002295180.1	1646	77673.4	FDPFFSIR	1;1	2	5	104810	EED87484.1	predicted protein [Thalassiosira pseudonana CCMP1335]	2.14839	1	0.110189	0.348964	1.68188	1	0.0942906	0.393314	1.56245	1	0.385061	0.700781	1.2478	1	0.531547	0.837177	1.75161	1	0.152785	0.47885	1.57887	1	0.293771	0.674819	1.33642	1	0.345365	0.741202	1.2202	1	0.620338	0.900636	0.759491	1	0.267273	0.6679	1.26471	1	0.446655
309	XP_002294116.1	1013	76813.7	GNEATIAWLR;DNVHFVLDLYDPFGFNK	1;1	2	4	135421;135423;135424;348322	EED88471.1	predicted protein [Thalassiosira pseudonana CCMP1335]	0.668579	4	0.00539946	0.0424883	0.697004	4	0.00709929	0.0743774	0.367094	4	0.0059994	0.0467745	0.307069	3	0.0001	0.00261133	2.50544	4	0.00069993	0.012225	2.43404	4	0.00069993	0.0117745	1.45803	4	0.00349965	0.0440515	1.4435	4	0.039696	0.214573	0.599576	4	0.0245975	0.215978	0.99656	4	0.968703
310	XP_002296064.1	1529	76237.1	SLIDSYFSIVR;ALEIVNEVR	1;1	2	4	39720;188735;188752;109035	ACI64781.1	dynamin GTPase, switch/motor protein [Thalassiosira pseudonana CCMP1335]	0.700325	4	0.0230977	0.124411	0.783935	4	0.0329967	0.207902	0.686116	4	0.0446955	0.192546	0.749509	4	0.0174982	0.118558	1.24387	4	0.0888911	0.353028	1.11593	4	0.319368	0.703626	1.24496	4	0.0388961	0.238139	1.14259	4	0.223478	0.594631	1.00579	4	0.936706	0.98543	0.961582	4	0.69823
311	XP_002296651.1	1388	75712.8	VGIVYDLLK;LSPLVQWDTIER	1;1	2	3	195042;195043;227930	EED87046.1	chloride channel protein 7, partial [Thalassiosira pseudonana CCMP1335]	0.593631	3	0.0992901	0.32531	0.816338	3	0.555444	0.828124	0.435123	3	0.0272973	0.138486	0.607034	3	0.246775	0.604111	1.04001	3	0.754725	0.942616	0.971695	3	0.838016	0.960515	0.814072	3	0.109389	0.459814	0.739466	3	0.116688	0.415723	0.827734	3	0.0770923	0.399902	0.806141	3	0.20168
312	AAW58006.1	1208	74671.1	TLYEAIR;DVNPLGPCLGFR	1;1	2	2	60819;200284	EED89153.1;XP_002293417.1	long chain acyl-coA synthetase [Thalassiosira pseudonana]	0.790076	2	0.384562	0.70355	0.901635	2	0.591341	0.851115	0.53788	2	0.0735926	0.266681	0.621575	2	0.0625937	0.273981	1.07815	2	0.761024	0.942616	1.03627	2	0.89921	0.977859	0.777502	2	0.241276	0.663378	0.748525	2	0.278572	0.659776	0.726936	2	0.0719928	0.387856	0.901899	2	0.627837
313	XP_002286387.1	50	74150	GSSAAGLTASVVR;SASENIDLMSTILSR	1;1	2	3	149813;149819;266874	EED96028.1;ACJ03843.1	mcm5-like protein [Thalassiosira pseudonana CCMP1335]	0.823758	3	0.181382	0.464276	0.975674	3	0.859414	0.948547	0.859811	3	0.369663	0.689196	1.02363	3	0.886111	0.965985	1.38052	3	0.0429957	0.228844	1.20644	3	0.227277	0.596354	1.48923	3	0.0234976	0.173343	1.33107	3	0.0994901	0.377015	1.0694	3	0.512649	0.859188	0.869646	3	0.312069
314	XP_002293672.1	682	73468.8	GDIVGAAEAEGIFIR;RGDIVGAAEAEGIFIR	1;1	2	4	242165;273947;273968;273969	EED88681.1	predicted protein [Thalassiosira pseudonana CCMP1335]	0.807351	4	0.430857	0.736861	0.898646	4	0.451055	0.753792	0.844357	4	0.568643	0.832623	0.935476	4	0.486751	0.805033	0.999463	4	0.9977	0.998255	0.891865	4	0.446755	0.808201	0.997162	3	0.980402	0.99436	0.982349	4	0.858914	0.969879	1.06459	4	0.454855	0.821704	0.918885	4	0.785721
315	XP_002293459.1	351	73289.3	TLLPVDYYR;VDMYCEQVCITNLGR	1;1	2	3	138355;304467;306574	EED89195.1	multispanning membrane protein [Thalassiosira pseudonana CCMP1335]	0.6161	3	0.277972	0.5949	0.757354	3	0.283872	0.658348	0.708299	3	0.715528	0.897279	0.865525	3	0.849215	0.950588	1.05523	3	0.785621	0.947965	0.838622	3	0.622538	0.896454	1.25958	3	0.690031	0.92522	1.01476	3	0.985201	0.996217	1.16934	3	0.732327	0.926988	0.84636	3	0.271673
316	XP_002289013.1	480	72570.9	GTAFGGFK;IIAVDINPDK	1;1	2	2	122442;214715	EED94449.1	predicted protein [Thalassiosira pseudonana CCMP1335]	1.43499	2	0.188681	0.473793	1.16512	2	0.426057	0.735398	1.32446	2	0.387161	0.700781	1.08964	2	0.729427	0.907127	0.888293	2	0.636436	0.901533	1.06691	2	0.815618	0.95332	0.856935	2	0.468853	0.83813	1.04039	2	0.885611	0.972013	0.955608	2	0.791521	0.945559	1.22131	2	0.350665
317	EJK53022.1	1445	72379.3	TFELAAAVNR;TLLIDEDTCATNFMIR	1;1	2	4	123294;311266;311269;311270	-	hypothetical protein THAOC_27607 [Thalassiosira oceanica]	0.766422	4	0.271873	0.584624	0.802166	4	0.189681	0.560336	0.676561	4	0.249575	0.562953	0.71485	4	0.0778922	0.310535	1.0931	4	0.361564	0.732621	1.0503	4	0.789421	0.946044	1.00945	4	0.962404	0.993867	1.14709	3	0.335366	0.723813	0.857294	3	0.136286	0.505805	1.00715	4	0.959904
318	EJK46367.1	964	72332.7	GTLIELLQK;ICLLDIDIQGAQNVK	1;1	2	5	193628;193630;193631;321998;322002	-	hypothetical protein THAOC_34966 [Thalassiosira oceanica]	1.18337	5	0.163584	0.446502	1.12092	3	0.266673	0.641583	1.22762	5	0.250175	0.562953	1.33375	4	0.0175982	0.118558	1.05538	5	0.638136	0.902521	1.0721	4	0.523248	0.852349	1.26469	4	0.030197	0.202062	1.11441	5	0.19838	0.561453	1.06063	5	0.337966	0.731498	1.02421	5	0.835816
319	EED91176.1	1751	71547.5	LSLFTSVPK;TKPTQHSVK	1;1	2	3	187738;187739;266377	XP_002291069.1	ctp-synthetase [Thalassiosira pseudonana CCMP1335]	1.33055	3	0.0749925	0.275594	1.10831	3	0.477852	0.770805	1.46744	3	0.20228	0.50598	1.24757	3	0.114189	0.389712	0.836487	3	0.215778	0.564116	0.754576	3	0.0990901	0.383575	0.925785	3	0.516148	0.865197	0.841257	3	0.257974	0.637334	1.0734	3	0.652635	0.908812	1.10855	3	0.489851
320	XP_002290029.1	619	69216.3	ALLGQFLFK;KVENLSGGEK	1;1	2	2	44982;273024	EED93566.1	predicted protein [Thalassiosira pseudonana CCMP1335]	0.85103	2	0.546445	0.820763	0.942957	2	0.759824	0.913034	0.664337	2	0.217978	0.524137	0.750416	2	0.240176	0.601357	0.930909	2	0.772623	0.945725	1.30241	2	0.343466	0.724354	0.770404	2	0.225977	0.641576	1.07584	2	0.786221	0.9518	0.846458	2	0.330667	0.727373	0.929517	2	0.734527
321	XP_002290145.1	807	68511.6	DAMLENVALK;AGDSALFFGLSGTGK	1;1	2	3	216167;284532;284538	EED91897.1;BAO52743.1	phosphoenolpyruvate carboxykinase [Thalassiosira pseudonana CCMP1335]	1.48778	3	0.0484952	0.210068	0.959686	3	0.678232	0.885656	2.04824	3	0.0586941	0.234907	1.31776	3	0.154785	0.470357	1.21977	3	0.165983	0.49994	1.97094	3	0.00169983	0.0228335	1.73762	3	0.0257974	0.182099	2.88637	3	0.00829917	0.073953	1.39306	3	0.0626937	0.359391	1.551	3	0.0118988
322	EJK76865.1	443	67263.6	VADPVVGFR;AFLPVLDSFGFETDLR	1;1	2	2	84988;299915	EED96637.1;XP_002286996.1	hypothetical protein THAOC_01347 [Thalassiosira oceanica]	0.822188	2	0.573543	0.835508	0.869432	2	0.467853	0.76764	0.644211	2	0.189781	0.489493	0.686323	2	0.128987	0.419557	1.12204	2	0.646435	0.90642	1.01975	2	0.944106	0.98687	0.925606	2	0.709929	0.930448	0.841968	2	0.518648	0.851346	0.836491	2	0.29617	0.698698	0.979138	2	0.921208
323	EJK72630.1	1680	67119.1	GNLPLHSAASFR;MELPDPTPFEIAR	1;1	2	7	179764;179765;179783;241683;241686;241689;241692	-	hypothetical protein THAOC_05822, partial [Thalassiosira oceanica]	1.1578	7	0.019798	0.111837	1.29481	7	0.0405959	0.237513	0.847061	6	0.0589941	0.235217	1.08528	7	0.245975	0.604111	1.30182	7	0.0460954	0.235584	1.14496	7	0.19818	0.557382	1.08873	7	0.159184	0.538931	0.963021	7	0.512149	0.846527	0.852277	7	0.150685	0.52769	0.884605	7	0.173683
324	XP_002296519.1	892	67026.9	TTLVDALIR;VPEEYSGSVIDLFNTR	1;1	2	5	97044;97046;299692;299693;299694	EED87215.1	predicted protein, partial [Thalassiosira pseudonana CCMP1335]	1.11541	5	0.314469	0.63305	1.37335	5	0.00469953	0.0568359	1.02653	4	0.834817	0.93867	1.10584	4	0.29847	0.664825	1.14161	5	0.184582	0.526269	1.44899	3	0.0422958	0.219402	1.00632	3	0.958104	0.992283	1.21034	4	0.0986901	0.377015	0.885454	5	0.19678	0.595302	0.796693	3	0.0776922
325	XP_002288370.1	757	66558.4	SPPSTLDNK;GVVTQQLQEAYK	1;1	2	2	177304;272803	EED93806.1	branched-chain amino acid aminotransferase, partial [Thalassiosira pseudonana CCMP1335]	1.46985	2	0.161984	0.444284	1.06152	2	0.774423	0.913546	1.08114	2	0.816118	0.933225	0.792774	2	0.341966	0.697726	1.48711	2	0.117388	0.422114	1.14237	2	0.633337	0.896678	1.14984	2	0.508749	0.864287	0.89038	2	0.666033	0.918363	0.776369	2	0.143786	0.520753	1.37971	2	0.133787
326	EED93894.1	1461	66453.7	IERPIMEDFAR;ATNQATGLLAK	1;1	2	2	208413;212228	XP_002288458.1	sec1-family transport protein, partial [Thalassiosira pseudonana CCMP1335]	1.00935	2	0.973503	0.989326	1.06714	2	0.737026	0.905949	0.987284	2	0.970503	0.985131	1.05232	2	0.837816	0.948076	1.12755	2	0.631837	0.90012	1.04839	2	0.866813	0.971791	1.14962	2	0.509149	0.864287	1.08472	2	0.824418	0.960564	1.00725	2	0.970303	0.990105	0.962371	2	0.857714
327	XP_002289883.1	758	63799.3	YVVPTPIEESISMSR;GVELTHDNFVSNVYAVR	1;1	2	5	280351;283077;312123;312125;312131	EED93420.1	predicted protein, partial [Thalassiosira pseudonana CCMP1335]	1.31821	5	0.0735926	0.273048	1.15884	3	0.167983	0.53419	1.72416	5	0.0251975	0.131538	1.48861	5	0.00569943	0.0516099	1.11882	4	0.260174	0.618196	1.27136	4	0.0621938	0.290023	1.65138	5	0.00039996	0.00959904	2.12463	5	0.00929907	0.0800877	1.30088	5	0.0525947	0.327071	1.14712	5	0.133487
328	XP_002291513.1	1744	62676.7	RVEITGPVDR;LVEDMLTK	1;1	2	5	22209;139122;139128;139130;174196	EED91620.1	probable malate synthase [Thalassiosira pseudonana CCMP1335]	1.11463	5	0.614239	0.855377	0.842552	3	0.121088	0.449717	1.49269	5	0.030197	0.146986	1.07994	3	0.555144	0.848579	0.779377	4	0.0352965	0.20287	0.77545	4	0.0928907	0.36748	1.25671	4	0.0331967	0.216368	1.19939	5	0.0532947	0.26068	1.41547	4	0.00059994	0.0177031	1.35882	5	0.0518948
329	EED89095.1	796	62377.4	QCFDLLGIR;LVDLLDEAVSR	1;1	2	5	132675;166763;166790;166810;166811	XP_002293359.1	predicted protein [Thalassiosira pseudonana CCMP1335]	0.440699	5	0.0119988	0.0764023	0.857841	5	0.193281	0.565952	0.399064	5	0.010199	0.0685387	0.862809	4	0.142986	0.44764	0.818918	5	0.259374	0.618196	0.687531	5	0.0206979	0.133225	0.783062	5	0.170183	0.556962	0.654725	5	0.0229977	0.152191	0.961196	5	0.666033	0.911227	0.555852	5	0.0116988
330	EJK47805.1	1004	62228.6	TLGTLWSSSLFPGR;IIDPFVSGVYAGDPTTLSMK	1;1	2	4	243071;351714;351716;352454	-	hypothetical protein THAOC_33459 [Thalassiosira oceanica]	0.917518	3	0.525447	0.809745	0.818692	4	0.0291971	0.191321	1.10504	4	0.429557	0.733996	0.860091	4	0.135286	0.433013	1.48404	3	0.0541946	0.263503	1.10342	4	0.369763	0.752965	1.34876	4	0.154685	0.534419	1.23344	4	0.0767923	0.339622	1.07322	4	0.334367	0.730412	1.29631	4	0.0450955
331	XP_002288953.1	1020	61959.4	YDIYDAVLR;LDAYGLYLPSR	1;1	2	3	134503;179010;179011	EED94389.1	predicted protein [Thalassiosira pseudonana CCMP1335]	0.516759	3	0.00259974	0.0261717	0.790626	3	0.0527947	0.283143	0.356261	3	0.0486951	0.204906	0.550263	3	0.0319968	0.176886	1.09703	3	0.476852	0.807015	0.92392	3	0.582642	0.882048	0.809011	3	0.423058	0.804893	0.656953	3	0.159584	0.488523	0.784931	3	0.228577	0.631041	0.713977	3	0.0417958
332	EJK74290.1	1545	61684.7	TMVENLNR;GDILAITATDR	1;1	2	4	89592;140260;140264;140265	-	hypothetical protein THAOC_04038 [Thalassiosira oceanica]	0.893038	4	0.648535	0.869388	0.854359	4	0.0780922	0.349186	1.04737	3	0.787221	0.921238	0.832486	4	0.220378	0.579362	1.12526	4	0.475152	0.806414	0.869101	3	0.342866	0.724354	1.14033	4	0.547545	0.872208	1.12045	3	0.424658	0.79701	1.01101	4	0.951705	0.985468	1.06383	4	0.735526
333	EED86805.1	889	61304	AIVGAAFGAAGQR;APSASLLLTK	1;1	2	3	26598;153823;190116	XP_002297077.1	hypothetical protein THAPSDRAFT_25495 [Thalassiosira pseudonana CCMP1335]	0.982642	3	0.89621	0.974962	0.776955	3	0.0794921	0.353691	1.06961	3	0.692131	0.892178	0.832524	3	0.170083	0.492748	1.26565	3	0.109589	0.403907	0.904807	3	0.488151	0.837628	1.41617	3	0.0150985	0.13066	1.03287	3	0.819618	0.959865	1.0996	3	0.348065	0.73969	1.29178	3	0.0516948
334	EJK44028.1	1775	60458.8	GMDLYFER;LDATSIGQR	1;1	2	4	13082;85196;85200;85204	-	hypothetical protein THAOC_37468 [Thalassiosira oceanica]	1.11196	4	0.355464	0.67379	0.941101	4	0.745825	0.910425	1.03762	3	0.828817	0.938441	0.792237	4	0.245575	0.604111	1.46132	4	0.00469953	0.0474969	1.10862	4	0.518948	0.851893	1.26513	4	0.0519948	0.29156	0.969078	4	0.80342	0.954558	0.878849	4	0.09959	0.438294	1.18512	4	0.148585
335	EED96363.1	1575	60323.2	TFIMPGQETR;GTTATEIIQMAR	1;1	2	4	150963;186394;186395;190778	XP_002286722.1	glutamine phosphoribosylpyrophosphate amidotransferase [Thalassiosira pseudonana CCMP1335]	0.731439	4	0.0163984	0.0972034	0.977591	4	0.856914	0.948501	0.851768	3	0.342566	0.670014	1.01864	4	0.936306	0.979264	1.12522	4	0.549745	0.849537	0.8856	4	0.692631	0.911356	1.20186	4	0.069793	0.358936	0.959519	4	0.80212	0.953762	1.21417	3	0.070193	0.381714	0.776563	4	0.105589
336	XP_002293929.1	1345	59601.7	IAMLDMNLQR;YFVEAGIICAR	1;1	2	2	163970;188361	EED88938.1;EJK71526.1	t-complex protein 1 alpha subunit chaperonin-like protein, partial [Thalassiosira pseudonana CCMP1335]	1.33004	2	0.431857	0.736861	1.1895	2	0.366963	0.698657	0.919599	2	0.832517	0.93867	0.859731	2	0.537146	0.837691	1.34934	2	0.229277	0.57794	1.07761	2	0.788821	0.946044	0.987155	2	0.948205	0.991148	0.784208	2	0.366163	0.743899	0.760309	2	0.115788	0.467067	1.08832	2	0.69563
337	XP_002291727.1	763	59467.6	VFVAPSGVQK;AQCESFDYLFETAVK	1;1	2	2	198097;332452	EED90578.1	predicted protein [Thalassiosira pseudonana CCMP1335]	0.705276	2	0.20128	0.490698	0.821031	2	0.30267	0.671869	0.688184	2	0.253875	0.566578	0.796767	2	0.351865	0.70277	0.766552	2	0.284672	0.649904	0.618849	2	0.0906909	0.361959	0.78102	2	0.248875	0.671897	0.633006	2	0.0966903	0.374672	1.00392	2	0.982202	0.996137	0.896918	2	0.608839
338	XP_002295758.1	1678	58920.4	DGSGVPEILVR;DLYVSYVDEDILVVR	1;1	2	4	139085;139089;331588;331590	ACI64475.1	predicted protein [Thalassiosira pseudonana CCMP1335]	0.954206	4	0.629037	0.861996	0.909585	4	0.214879	0.587574	1.02191	3	0.89691	0.955255	0.94214	4	0.535746	0.837691	1.38068	4	0.194381	0.535789	1.4362	4	0.146785	0.481263	1.48455	4	0.0518948	0.29156	1.83714	3	0.00289971	0.0352667	1.05938	4	0.417858	0.791505	1.07674	4	0.391361
339	EED87901.1	1125	58110.1	IALTPVALMEGHR;VVGCHVATDGAGEMVQGVAIAIK	1;1	2	3	216141;216150;358545	XP_002294541.1	glutathione reductase, gro-2 [Thalassiosira pseudonana CCMP1335]	1.66062	3	0.0114988	0.0742686	0.857496	3	0.152385	0.512645	2.08231	3	0.00409959	0.0351589	1.06336	3	0.635336	0.886696	0.716334	3	0.0372963	0.209675	0.799291	3	0.222478	0.590309	0.925641	3	0.515048	0.865197	1.0478	3	0.738026	0.937781	1.25239	3	0.0421958	0.289477	1.85662	3	0.00029997
340	XP_002291980.1	74	57929.9	RSDVLSAWR;VADIMAEELGWSK	1;1	2	7	122787;122792;287909;287913;287914;287934;287935	EED90831.1	predicted protein [Thalassiosira pseudonana CCMP1335]	0.887617	7	0.425257	0.731216	0.922465	7	0.39886	0.718572	0.845306	7	0.186081	0.482205	0.892488	7	0.266673	0.62981	0.975866	7	0.863214	0.96997	0.890362	7	0.388761	0.763108	0.962713	7	0.552345	0.873656	0.883726	7	0.130487	0.443163	0.986696	7	0.871413	0.969441	0.980669	7	0.750725
341	EJK58598.1	1709	57907.5	LTPQETALLR;QIFAASGGIK	1;1	2	2	139177;187719	-	hypothetical protein THAOC_21263 [Thalassiosira oceanica]	0.66388	2	0.142786	0.41168	1.00091	2	0.9954	0.9986	0.61223	2	0.145985	0.424064	0.931679	2	0.776822	0.927042	1.12682	2	0.633337	0.90012	1.61231	2	0.0919908	0.366307	1.08754	2	0.688331	0.92522	1.58567	2	0.0947905	0.370919	0.956066	2	0.794321	0.945559	0.686719	2	0.0840916
342	XP_002291401.1	309	57829.7	ALEIVPR;LLEIEHPAAK	1;1	2	3	45910;45918;220390	EED91508.1	t-complex protein 1 ETA subunit, partial [Thalassiosira pseudonana CCMP1335]	0.682567	3	0.0287971	0.143349	0.807667	3	0.10379	0.414698	0.75828	3	0.131187	0.397088	0.88376	3	0.458154	0.789565	0.830247	3	0.378862	0.747339	0.617047	3	0.248675	0.624289	0.953115	3	0.682132	0.923845	0.713999	3	0.263874	0.643594	1.12559	3	0.267273	0.6679	0.890756	3	0.452355
343	XP_002290798.1	262	57720.9	MIVEKPFGR	1;1	2	1	209482	EED92550.1;EJK44722.1	glucose-6-phosphate 1-dehydrogenase, partial [Thalassiosira pseudonana CCMP1335]	1.19621	1	0.665033	0.875488	1.04007	1	0.891311	0.96036	1.38993	1	0.513949	0.792268	1.21239	1	0.583042	0.862868	0.597914	1	0.178882	0.517378	0.573031	1	0.205579	0.569297	0.718726	1	0.292171	0.707832	0.693646	1	0.373463	0.756167	1.17127	1	0.521448	0.862689	1.14923	1	0.643236
344	EED91442.1	1380	57634.8	VGFIDFGMVGR;VLEFLQPDFER	1;1	2	3	156606;161779;212391	XP_002291335.1;EJK44492.1;EJK59222.1	predicted protein [Thalassiosira pseudonana CCMP1335]	1.35354	3	0.090191	0.306649	0.759335	3	0.549245	0.826673	1.02462	3	0.887011	0.952031	0.578014	3	0.161884	0.479794	1.51607	3	0.0247975	0.157635	1.43356	3	0.0464953	0.232477	1.19737	3	0.212779	0.627872	1.14835	3	0.332167	0.720362	0.82809	3	0.113789	0.4638	1.72018	3	0.170183
345	EED88490.1	467	57561.1	GGCSFVQK;DTPNTFLDLEMQAQVSR	1;1	2	2	153175;317401	XP_002294135.1	predicted protein [Thalassiosira pseudonana CCMP1335]	1.08575	2	0.761524	0.918219	0.909556	2	0.622138	0.859509	1.11538	2	0.744226	0.909188	0.92871	2	0.768823	0.923583	1.00844	2	0.975402	0.994138	1.01609	2	0.955204	0.988246	1.06746	2	0.818918	0.958346	1.08784	2	0.756024	0.94176	1.04962	2	0.779422	0.945559	1.20348	2	0.385761
346	XP_002290513.1	1748	56895.8	THTTAISSQMLYK;WTEIGNSGMFRPEMLAPMGLPENVR	1;1	2	2	292929;364132	EED92265.1	phenylalanyl-trna synthetase [Thalassiosira pseudonana CCMP1335]	1.40114	2	0.217378	0.51373	1.12086	2	0.557244	0.828124	1.21095	2	0.583142	0.837997	1.03437	2	0.893411	0.970516	0.843966	2	0.493151	0.823319	0.703237	2	0.207579	0.573072	0.758299	2	0.20048	0.608121	0.59936	2	0.114889	0.413599	0.942925	2	0.736026	0.926988	1.13495	2	0.551345
347	EED87535.1	489	56684	VMAFPTLR;VPGNFHIEAK	1;1	2	3	8094;82534;218200	XP_002295231.1;EJK74922.1	predicted protein [Thalassiosira pseudonana CCMP1335]	0.47416	3	0.00109989	0.013302	0.672048	3	0.129387	0.466311	0.440856	3	0.0173983	0.100753	0.622775	3	0.0181982	0.121008	1.17226	3	0.476852	0.807015	0.900278	3	0.759624	0.940703	1.14082	3	0.273973	0.694578	0.884345	3	0.387161	0.768028	0.976363	3	0.906709	0.977429	0.751386	3	0.153985
348	EJK77308.1	886	56521.2	AEAILEWMDR;AEQILAWMEK	1;1	2	3	167876;167891;243271	EED88886.1;XP_002293877.1	hypothetical protein THAOC_00867, partial [Thalassiosira oceanica]	0.905258	3	0.757224	0.91516	0.878188	3	0.512049	0.79946	0.870978	3	0.616538	0.855459	0.854544	3	0.39506	0.739251	0.824882	3	0.341566	0.712024	0.746028	3	0.261574	0.640232	0.828721	3	0.139386	0.521353	0.747438	3	0.146085	0.4704	1.00591	3	0.974003	0.991578	1.04326	3	0.717628
349	EED89429.1	946	56362	VFIAGDDFK;YVPYVADSK	1;1	2	4	192827;200601;200609;200610	XP_002292968.1	myo-inositol-1-phosphate synthase-like protein, partial [Thalassiosira pseudonana CCMP1335]	1.18588	4	0.116988	0.364098	1.02948	4	0.688831	0.890699	1.52127	4	0.0146985	0.0912829	1.32172	4	0.020098	0.128428	0.803901	3	0.134887	0.451042	0.634269	4	0.0216978	0.135765	0.979475	4	0.817518	0.958226	0.85087	4	0.270073	0.653126	1.28597	4	0.00749925	0.103043	1.25399	3	0.0790921
350	EJK48589.1	1362	55976.3	FRDDSLTFK;ATIKPQYVDHIPR	1;1	2	2	222159;302350	XP_002297332.1;EED86360.1	hypothetical protein THAOC_32600, partial [Thalassiosira oceanica]	0.554146	2	0.0682932	0.260178	1.0469	2	0.812319	0.929396	0.573326	2	0.106989	0.348441	1.09631	2	0.711729	0.90383	0.675513	2	0.121388	0.42819	0.723789	2	0.246075	0.620358	0.724716	2	0.140186	0.521353	0.782341	2	0.360464	0.741354	1.05231	2	0.767923	0.937762	0.565154	2	0.0159984
351	EED89783.1	765	55181.5	SIQNFPIGGR;AIMILGGEVGSK	1;1	2	4	122403;122404;122408;233248	XP_002292587.1	predicted protein [Thalassiosira pseudonana CCMP1335]	1.1593	4	0.263374	0.573188	1.04038	4	0.642536	0.871761	1.30258	4	0.383462	0.699002	1.17353	4	0.40206	0.749237	0.716573	4	0.010099	0.0814712	0.9938	4	0.970903	0.990309	0.833863	4	0.323468	0.728242	1.24714	3	0.152385	0.480162	1.1382	4	0.506749	0.852476	0.990775	3	0.936006
352	EED87532.1	381	55075.1	ILGEEVFYR;VEGGGIWICGNYR	1;1	2	5	133878;133879;221430;233577;233578	XP_002295228.1	protoporphyrinogen IX oxidase usually abbreviated, partial [Thalassiosira pseudonana CCMP1335]	0.844493	4	0.119988	0.369604	0.933443	5	0.240576	0.616452	0.774217	3	0.153985	0.438399	0.778593	5	0.0506949	0.240875	1.10012	5	0.531847	0.843246	1.21346	5	0.256674	0.640232	0.955063	5	0.80322	0.955652	1.06696	5	0.622438	0.902811	0.866741	3	0.159184	0.542673	1.02046	5	0.825317
353	EED93221.1	606	54265.9	LVTYVCGIENIR;FGSVPHAGYGLGFER	1;1	2	4	223117;223129;223130;258162	XP_002289684.1	asparaginyl-trna synthetase [Thalassiosira pseudonana CCMP1335]	1.47131	4	0.0588941	0.236363	1.43699	4	0.0249975	0.16871	1.139	4	0.487651	0.776534	1.15356	4	0.344466	0.697726	1.21125	4	0.0832917	0.342515	1.63582	4	0.00249975	0.0296023	0.983478	4	0.852115	0.968924	1.43684	3	0.0368963	0.204349	0.820659	4	0.0225977	0.208595	1.00425	4	0.960904
354	XP_002289820.1	303	53751.9	DFFGGHTYER;VCSYAQGLGIIK	1;1	2	2	166398;262212	EED93357.1	6-phosphogluconate dehydrogenase [Thalassiosira pseudonana CCMP1335]	0.923764	2	0.770523	0.922805	0.899356	2	0.626237	0.86029	1.03949	2	0.908309	0.960543	0.999347	2	0.998	0.9995	0.742421	2	0.231777	0.581735	0.601388	2	0.0755924	0.319827	0.863366	2	0.488151	0.850951	0.702675	2	0.220278	0.591446	1.13709	2	0.456554	0.821704	1.05481	2	0.80452
355	EED91696.1	246	53645	AMDILADILLR;DTGLFGLYAVAER	1;1	2	4	171253;171254;176380;217104	XP_002291589.1	probable mitochondrial processing peptidase [Thalassiosira pseudonana CCMP1335]	0.898331	3	0.430957	0.736861	1.20387	4	0.472553	0.76764	0.803062	4	0.262974	0.577444	0.90412	4	0.29817	0.664825	1.09776	4	0.821218	0.954991	0.983315	4	0.970603	0.990309	0.846107	4	0.344166	0.741202	0.744164	4	0.148385	0.473889	0.775851	4	0.336166	0.730566	0.926049	4	0.563444
356	XP_002288148.1	1677	53568.7	YLVVSSQYR;AFLTYDVLK	1;1	2	2	130573;207850	EED93584.1;EJK77487.1	probable cysteinyl-trna synthetase, partial [Thalassiosira pseudonana CCMP1335]	1.8055	2	0.20068	0.490007	1.30624	2	0.167583	0.53419	1.6161	2	0.326267	0.656545	1.18825	2	0.479852	0.800642	1.12287	2	0.644336	0.90642	1.13971	2	0.638136	0.896678	1.0454	2	0.831717	0.960557	1.07448	2	0.790721	0.952676	0.927532	2	0.665533	0.911227	1.35565	2	0.293771
357	EED89002.1	1300	53288.9	VCDAVSITLNK;SPFEYCDVVTTTTHK	1;1	2	6	243545;243546;330356;330357;330359;330360	XP_002293993.1	serine hydroxymethyltransferase [Thalassiosira pseudonana CCMP1335]	0.946181	6	0.624438	0.860808	1.08502	6	0.10209	0.410638	1.48161	6	0.0810919	0.285805	1.70322	6	0.00149985	0.019728	0.38238	6	0.00029997	0.00719528	0.318917	6	0.0001	0.00239976	0.646879	5	0.0001	0.0036731	0.519816	6	0.0001	0.00260844	1.54519	6	0.00319968	0.058176	0.88304	6	0.248375
358	EED92462.1	917	52064	NVEVVDTTCPWVSK;DFGFCWGVER	1;1	2	2	154526;180499	XP_002290710.1	predicted protein [Thalassiosira pseudonana CCMP1335]	1.16955	2	0.559044	0.826509	1.00398	2	0.983602	0.995041	1.47548	2	0.246275	0.559321	1.26408	2	0.337166	0.695223	0.692012	2	0.142886	0.465481	0.517434	2	0.0268973	0.157704	0.8785	2	0.539646	0.871813	0.660242	2	0.127387	0.435926	1.21886	2	0.248575	0.646948	1.13132	2	0.562044
359	EED90892.1	1079	50981.1	QILGLDLK;FCLGYNLAMAEMK	1;1	2	2	158754;307725	XP_002292041.1	hypothetical protein THAPSDRAFT_263399, partial [Thalassiosira pseudonana CCMP1335]	0.575314	2	0.0568943	0.23248	0.699998	2	0.069993	0.329785	0.631898	2	0.170783	0.465325	0.75149	2	0.241776	0.603934	1.08975	2	0.729427	0.931304	0.740624	2	0.281072	0.657051	1.23151	2	0.331167	0.73231	0.849016	2	0.537646	0.861159	1.11274	2	0.538846	0.867098	0.883362	2	0.559644
360	XP_002292633.1	672	49725.5	GVCMVPK;LSTVTGDQQYIK	1;1	2	2	124224;270760	EED89829.1	predicted protein [Thalassiosira pseudonana CCMP1335]	1.51827	2	0.137186	0.401967	1.41594	2	0.0763924	0.345462	1.4117	2	0.291271	0.613543	1.34697	2	0.223678	0.583831	0.936056	2	0.789221	0.949004	0.900879	2	0.709529	0.923465	0.909226	2	0.646235	0.908327	0.883369	2	0.642336	0.906968	0.961159	2	0.818418	0.953497	1.06	2	0.787421
361	XP_002290606.1	598	49388.2	QTLLELVDYVNTPAGQK;LQLCGVIFSFDDPTSDK	1;1	2	4	338753;338756;338757;342445	EED92358.1;EJK67089.1	hypothetical protein THAPSDRAFT_34227, partial [Thalassiosira pseudonana CCMP1335]	0.714248	4	0.0791921	0.284064	1.05901	4	0.560644	0.829191	0.721423	4	0.0358964	0.167053	1.10075	4	0.645535	0.889537	0.90828	4	0.327867	0.702203	0.857426	4	0.177782	0.527196	0.949872	4	0.565743	0.883974	0.902409	4	0.573843	0.879475	1.1209	3	0.242976	0.642119	0.70356	4	0.143286
362	XP_002296218.1	189	49327.5	EFFELIK;MTNPVNVEFITDR	1;1	2	3	166852;246192;249633	ACI64935.1;EJK68752.1	predicted protein [Thalassiosira pseudonana CCMP1335]	0.848601	3	0.293171	0.61287	1.19503	3	0.454055	0.756266	0.803738	3	0.262274	0.577444	1.1806	3	0.622838	0.884027	0.896636	3	0.409059	0.761755	0.947303	3	0.707929	0.922717	0.884328	3	0.307269	0.71736	0.942403	3	0.669033	0.920122	0.979898	3	0.830817	0.95925	0.722865	3	0.0563944
363	EJK56530.1	840	48826	GYIAVVNR;RLEQPGVQCVDLVYDELQR	1;1	2	3	67090;346802;346803	-	hypothetical protein THAOC_23566, partial [Thalassiosira oceanica]	0.766399	3	0.090191	0.306649	0.961172	3	0.888811	0.958491	0.577984	3	0.0544946	0.224075	0.755339	3	0.0547945	0.25383	1.15227	3	0.294771	0.66536	1.01536	3	0.916608	0.979701	0.922684	3	0.723728	0.934424	0.798346	3	0.218078	0.589941	0.840566	3	0.471753	0.830024	0.833781	3	0.362964
364	EJK67142.1	1654	48620.1	FLEVECWK;NIDSSLPVGTVFGIYR	1;1	2	4	217874;285435;285441;285447	XP_002295491.1;ACI64208.1	hypothetical protein THAOC_11863 [Thalassiosira oceanica]	1.57965	4	0.0229977	0.124411	1.44451	4	0.00219978	0.0341724	1.46793	3	0.0672933	0.253017	1.30788	4	0.0279972	0.161246	1.00683	4	0.946205	0.990535	0.945094	3	0.688831	0.908744	0.867031	4	0.133987	0.517545	0.72868	4	0.130087	0.443163	0.882626	4	0.107989	0.459529	0.941997	3	0.612039
365	EED87452.1	4	48607.6	LALVPGESFGAPGTVR;KLALVPGESFGAPGTVR	1;1	2	4	253784;253785;321852;321853	XP_002295148.1	aspartate aminotransferase [Thalassiosira pseudonana CCMP1335]	0.960712	4	0.681132	0.8824	1.18654	3	0.152285	0.512645	1.08857	4	0.49675	0.779989	1.03604	4	0.911909	0.97334	0.931926	4	0.465253	0.80087	0.923719	4	0.464454	0.815801	1.0906	4	0.335666	0.735931	1.08238	3	0.576042	0.879475	1.14426	4	0.0884912	0.414097	0.844886	3	0.169783
366	XP_002297200.1	226	48362.1	FLGFEQIFK;FHPTVDDGILK	1;1	2	2	222184;248552	EED86525.1	glutmatae dehydrogenase, nadp-gdh, partial [Thalassiosira pseudonana CCMP1335]	1.5666	2	0.179282	0.461604	1.10327	2	0.623538	0.859509	1.83142	2	0.0812919	0.285951	1.2776	2	0.316868	0.67739	1.26936	2	0.390461	0.755466	0.789942	2	0.451055	0.811076	1.51784	2	0.060194	0.326895	0.961139	2	0.885511	0.972013	1.16358	2	0.377762	0.763713	1.41275	2	0.108889
367	EED86366.1	1674	48275.7	KLVEYPNCK;MSALAAAVIRPQILTLDER	1;1	2	2	288838;329992	XP_002297338.1	predicted protein [Thalassiosira pseudonana CCMP1335]	0.812269	2	0.439756	0.741291	0.952638	2	0.80192	0.923951	0.878539	2	0.69793	0.895383	1.03063	2	0.90481	0.970516	0.833974	2	0.464054	0.800415	1.10047	2	0.732927	0.935779	0.934509	2	0.742526	0.936461	1.24558	2	0.487551	0.833421	1.11272	2	0.538946	0.867098	0.885874	2	0.568443
368	EED95661.1	1602	47943.2	GPITVAEFMR;IQLIEIGPGK	1;1	2	2	20441;207362	XP_002286020.1	predicted protein [Thalassiosira pseudonana CCMP1335]	1.1719	2	0.566443	0.831892	1.15589	2	0.451355	0.753792	1.20582	2	0.565243	0.829669	1.20441	2	0.446555	0.787157	0.848174	2	0.506549	0.828823	0.879574	2	0.645235	0.901167	0.906563	2	0.635636	0.905881	0.950222	2	0.851415	0.96874	1.05068	2	0.774923	0.945027	1.02066	2	0.926107
369	EED92289.1	307	47475.6	LELGSLQSVR;AFPWFMK	1;1	2	3	126532;126533;167129	XP_002290537.1	predicted protein [Thalassiosira pseudonana CCMP1335]	0.644168	3	0.0167983	0.0982811	0.910232	3	0.351665	0.689554	0.528409	3	0.0339966	0.160703	0.756978	3	0.205579	0.555944	1.18963	3	0.551645	0.850393	1.20517	3	0.531447	0.856273	1.0235	3	0.842316	0.965098	1.04632	3	0.746525	0.940466	0.862617	3	0.387761	0.773351	0.74303	3	0.0306969
370	XP_002286457.1	1107	46768.1	ELIAQGVSNLAAGAVGSAPVSGSMSR	1;1	2	4	117244;353133;353134;353138	EED96098.1	sulfate transporter, partial [Thalassiosira pseudonana CCMP1335]	0.724437	4	0.0189981	0.108681	1.37688	4	0.049895	0.271634	0.607925	4	0.0740926	0.267416	1.2871	4	0.0387961	0.200893	1.26138	4	0.306069	0.679776	1.58338	4	0.0518948	0.252461	1.09322	4	0.408159	0.793398	1.13584	3	0.369963	0.749925	0.896011	4	0.389861	0.773351	0.561399	4	0.00239976
371	EED87904.1	898	46556.7	LCNVLFTR;ILITGSNSGIGLDAAQR	1;1	2	2	103096;276110	XP_002294544.1	predicted protein [Thalassiosira pseudonana CCMP1335]	1.53891	2	0.127487	0.383187	1.38464	2	0.0965903	0.397388	1.40891	2	0.293971	0.616555	1.30038	2	0.282272	0.651285	0.944262	2	0.812919	0.95334	1.2937	2	0.356364	0.737306	0.902307	2	0.619938	0.902934	1.25295	2	0.40136	0.780179	0.947836	2	0.756924	0.931563	1.09056	2	0.688631
372	EJK49687.1	1621	46450.5	NADAILIVLDAGK;VQVLDLPGIIEGAAHGK	1;1	2	2	262962;323730	EED88207.1;XP_002294373.1	hypothetical protein THAOC_31409 [Thalassiosira oceanica]	0.704508	2	0.19988	0.488716	1.10279	2	0.611339	0.858638	0.866672	2	0.668633	0.882204	1.37543	2	0.19508	0.537515	1.0257	2	0.917308	0.985058	1.13078	2	0.658734	0.903421	1.29109	2	0.413659	0.797503	1.46209	2	0.281772	0.660321	1.2292	2	0.292271	0.697133	0.666029	2	0.0650935
373	EED89747.1	634	46333.6	VSAVDSLR;VFLDPAMYGDQELR	1;1	2	4	56246;56247;56265;270010	EJK54830.1;XP_002293286.1	predicted protein [Thalassiosira pseudonana CCMP1335]	1.22388	4	0.394061	0.71152	1.15993	4	0.320568	0.681155	0.927365	4	0.546045	0.820207	0.886646	4	0.219778	0.579362	1.44181	3	0.0254975	0.159825	1.71698	3	0.00769923	0.066628	1.00908	4	0.920208	0.984439	1.13133	4	0.253275	0.632181	0.789265	4	0.166083	0.554611	1.01051	3	0.927207
374	AAZ99426.1	1556	46217.6	APGFNHLQALDFMSK;NYVQALPYFDR	1;1	2	2	54518;210605	YP_316619.1;YP_009186128.1;ALO71425.1	NADH dehydrogenase subunit 7 (mitochondrion) [Thalassiosira pseudonana]	0.621454	2	0.0970903	0.319848	0.807314	2	0.264274	0.641535	0.702608	2	0.284272	0.604016	0.889867	2	0.633437	0.886696	0.896033	2	0.663234	0.912715	0.709618	2	0.218178	0.58615	1.03393	2	0.872613	0.976758	0.828516	2	0.483252	0.828774	1.12707	2	0.487051	0.841701	0.832447	2	0.390461
375	EED86434.1	1357	46194.3	ELPYALYDSQDILVR;MKELPYALYDSQDILVR	1;1	2	19	124429;294616;294617;294618;294619;294620;294621;294622;294626;294633;294634;294635;294636;294637;331332;331333;331334;349018;349829	XP_002297284.1	hypothetical protein THAPSDRAFT_bd1766 [Thalassiosira pseudonana CCMP1335]	1.70565	19	0.0001	0.00219734	1.05528	19	0.325167	0.683558	1.54381	19	0.00019998	0.00360164	0.974259	19	0.674833	0.892606	1.35836	19	0.0001	0.0035271	1.65442	19	0.0001	0.00239976	1.3083	18	0.0001	0.0036731	1.65339	17	0.0001	0.00260844	0.91233	18	0.0266973	0.225398	1.56019	19	0.00139986
376	EED87369.1	1554	45838.3	TFLFSDLDYVGR;FFPPLQGAQGK	1;1	2	4	222074;222076;222077;236671	XP_002295303.1	probable tryptophanyl tRNA synthetase [Thalassiosira pseudonana CCMP1335]	0.805018	4	0.174883	0.458717	0.806501	4	0.0224978	0.156529	0.909802	4	0.454755	0.751388	0.887844	4	0.223878	0.583831	0.706081	4	0.00769923	0.06891	0.656068	4	0.00559944	0.0522228	0.815893	4	0.246975	0.670521	0.766042	4	0.131587	0.445219	1.12071	4	0.30167	0.703375	1.05119	4	0.594541
377	XP_002288361.1	1182	45693.6	LIDGLVPAYYLR;IYFPDEGSAALAR	1;1	2	5	212500;212504;216508;216509;216526	EED93797.1	predicted protein [Thalassiosira pseudonana CCMP1335]	1.10359	5	0.813219	0.945781	0.178879	5	0.110789	0.429337	1.39606	5	0.633337	0.863467	0.273208	5	0.131287	0.423106	1.12729	5	0.484152	0.814008	0.878571	3	0.377162	0.756005	1.96152	5	0.108789	0.458596	1.65467	5	0.113089	0.409577	1.59397	5	0.0560944	0.336566	5.5838	5	0.19888
378	XP_002285989.1	711	45691.5	AEDFVFFSGGK;GGLAVTLIYGFEDR	1;1	2	2	239882;240610	EED95630.1	predicted protein [Thalassiosira pseudonana CCMP1335]	1.45426	2	0.173483	0.458215	1.4535	2	0.0586941	0.297935	1.50802	2	0.217978	0.524137	1.58799	2	0.0685931	0.290835	1.39296	2	0.184882	0.526269	1.52494	2	0.131987	0.454257	1.47548	2	0.0775922	0.378499	1.674	2	0.0675932	0.30802	1.05529	2	0.756124	0.931563	0.949518	2	0.809019
379	EED94434.1	1583	45645.2	SAQFEHTVLVTK;DCYPSPLNYYNFPK	1;1	2	3	271922;271936;329678	XP_002288998.1	methionine aminopeptidase [Thalassiosira pseudonana CCMP1335]	1.26366	3	0.243776	0.553254	1.12029	3	0.558844	0.829191	1.19094	3	0.309669	0.634487	1.07441	3	0.581542	0.862868	0.889695	3	0.381262	0.747848	0.721668	3	0.0627937	0.290353	0.872383	3	0.256974	0.678353	0.710382	3	0.0490951	0.248042	0.97328	3	0.845515	0.965884	1.11583	3	0.352465
380	XP_002291807.1	1435	45548.1	DVYIASQLVGEK;VFPVCGNTYNMLK	1;1	2	8	264748;264750;264751;264754;264758;264759;313450;303032	EED90658.1	methyltransferase [Thalassiosira pseudonana CCMP1335]	1.27561	8	0.00049995	0.00763483	1.02713	8	0.754825	0.912141	1.27787	8	0.0163984	0.0971495	1.08617	7	0.120888	0.403328	0.888298	8	0.0528947	0.259285	0.747971	7	0.00079992	0.0128559	0.926368	8	0.123988	0.492666	0.831933	8	0.00689931	0.0652784	1.03009	8	0.669533	0.911936	1.24151	8	0.0160984
381	EED93152.1	974	45425.6	VSIYPDGGLSR	1;1	2	6	145905	XP_002289615.1	allantoicase-like protein, partial [Thalassiosira pseudonana CCMP1335]	1.36151	1	0.464854	0.764992	1.76652	1	0.0721928	0.337024	1.0549	1	0.912709	0.960823	1.42431	1	0.337366	0.695223	1.44259	1	0.332067	0.704801	1.42816	1	0.40246	0.773135	1.17265	1	0.59554	0.897502	1.17555	1	0.685931	0.928328	0.813792	1	0.40186	0.780438	0.765668	1	0.384462
382	EJK58513.1	1359	44953.7	VDTLQLVFGITDK;LILGGDDEDDDDYDDDYDDDEDDDYEAFMK	1;1	2	2	287983;370203	-	hypothetical protein THAOC_21355, partial [Thalassiosira oceanica]	1.24067	2	0.558844	0.826509	1.47487	2	0.0505949	0.274615	1.17066	2	0.682632	0.89153	1.44089	2	0.138786	0.44006	1.021	2	0.932407	0.988504	0.824922	2	0.490751	0.839403	1.00379	2	0.985401	0.994797	0.817284	2	0.453455	0.817854	0.975383	2	0.885811	0.972078	0.83511	2	0.461054
383	EJK67647.1	1330	44048.4	GTTVATLK;QMGEDGIFVLLEGR	1;1	2	3	124320;252246;252252	-	hypothetical protein THAOC_11293 [Thalassiosira oceanica]	1.37332	3	0.19538	0.482957	1.17095	3	0.607239	0.858638	1.45035	3	0.0710929	0.259713	1.27208	3	0.443156	0.787157	0.8497	3	0.516548	0.835732	0.982273	3	0.953405	0.988246	0.905666	3	0.582842	0.889987	1.07416	3	0.783822	0.9518	1.06046	3	0.535746	0.867098	1.11742	3	0.507949
384	EJK62217.1	1798	43344	TLLFNVK;GGPQGGAFDKDLDYFR	1;1	2	4	138191;326393;326395;326396	-	hypothetical protein THAOC_17180 [Thalassiosira oceanica]	1.50525	3	0.0230977	0.124411	1.83488	3	0.00049995	0.0123412	1.22729	4	0.307269	0.632238	1.60494	4	0.00479952	0.0462499	1.50099	3	0.0156984	0.114803	1.33909	3	0.0869913	0.355874	1.33162	4	0.0114988	0.107802	1.40056	4	0.0143986	0.106656	1.03934	3	0.686331	0.916817	0.785414	4	0.212079
385	EED95817.1	269	43242.1	YIDPSYMIR;QLYVIGGDGTHR	1;1	2	3	143945;143946;192784	XP_002286176.1	6-phosphofructokinase, partial [Thalassiosira pseudonana CCMP1335]	0.762696	3	0.0858914	0.298113	0.900415	3	0.30357	0.671869	0.782623	3	0.174983	0.466879	0.923351	3	0.538646	0.837691	0.96888	3	0.852615	0.966016	0.842662	3	0.29617	0.674819	1.02729	3	0.818218	0.958226	0.903127	3	0.472353	0.824293	1.04922	3	0.613839	0.896115	0.883637	3	0.29797
386	XP_002286057.1	1460	42665.4	VYPSDANFLLFR;LLFLCSPGNPTAK	1;1	2	3	224402;224404;282819	EED95698.1	histidinol-phosphate aminotransferase [Thalassiosira pseudonana CCMP1335]	1.25109	3	0.29907	0.613969	1.13591	3	0.338566	0.685501	1.20347	3	0.29787	0.619474	1.13754	3	0.629237	0.885578	0.910627	3	0.682032	0.915848	0.797972	3	0.453955	0.811076	0.903364	3	0.438456	0.808813	0.790382	3	0.136986	0.451765	0.999471	3	0.9971	0.9985	1.05269	3	0.859814
387	EED95067.1	834	42481.1	QLYLGDTIEVEYVR;MQQIAPGFVQQVQQR	1;1	2	3	278437;288634;291125	XP_002287624.1	hypothetical protein THAPSDRAFT_268157 [Thalassiosira pseudonana CCMP1335]	0.841351	3	0.491251	0.782799	1.05583	3	0.778222	0.913546	0.787768	3	0.563144	0.828613	1.00158	3	0.9963	0.9995	1.20441	3	0.189981	0.527987	1.55171	3	0.0546945	0.261836	1.17405	3	0.363664	0.750611	1.54782	3	0.0293971	0.179372	0.976309	3	0.856914	0.966982	0.819322	3	0.310269
388	EED88338.1	1419	42253.1	LNPFGILGVK;ATYAIMQQLLPGEK	1;1	2	2	204819;305835	XP_002294504.1	predicted protein [Thalassiosira pseudonana CCMP1335]	0.925824	2	0.776322	0.927674	0.982432	2	0.928707	0.974683	0.690261	2	0.262774	0.577444	0.752226	2	0.243976	0.604111	1.04847	2	0.846115	0.962403	1.13723	2	0.644336	0.901167	0.826776	2	0.415658	0.797639	0.896903	2	0.708829	0.936167	0.807632	2	0.214579	0.615201	0.961189	2	0.853115
389	XP_002287523.1	1173	42198.1	STRDPLEFVK;DPLEFVK	1;1	2	7	14216;237182;142157;142168;142175;142176;142177	EED94966.1;EJK55386.1	pyruvate dehydrogenase [Thalassiosira pseudonana CCMP1335]	1.3692	7	0.00379962	0.0337286	1.11129	7	0.185281	0.556462	1.52976	7	0.00019998	0.00360164	1.18534	6	0.019598	0.127493	1.04348	7	0.544846	0.847171	1.09075	6	0.222078	0.590309	1.21312	7	0.0189981	0.152663	1.32173	5	0.0104989	0.0866886	1.14061	7	0.040196	0.27828	1.23642	7	0.0119988
390	XP_002293272.1	308	41719.8	WTDGPLQR;ALECAIAAPNR	1;1	2	3	88540;152883;152884	EED89733.1	predicted protein [Thalassiosira pseudonana CCMP1335]	1.5303	3	0.0541946	0.22502	1.45001	3	0.00749925	0.0773663	1.38639	3	0.0886911	0.303674	1.3503	3	0.0648935	0.279903	0.974071	3	0.838816	0.961765	1.6197	3	0.0365963	0.199616	0.922304	3	0.547045	0.872208	1.55544	3	0.120588	0.419842	0.942264	3	0.532047	0.86667	1.0353	3	0.845315
391	EED93827.1	879	41433.6	SFQALTER;VETAVDLLHKPTGIR	1;1	2	2	82858;316106	XP_002288391.1	predicted protein [Thalassiosira pseudonana CCMP1335]	1.11806	2	0.681432	0.8824	1.03438	2	0.859114	0.948547	0.884621	2	0.710629	0.895383	0.830639	2	0.447355	0.787157	0.886256	2	0.630037	0.90012	1.33334	2	0.30257	0.684203	0.738688	2	0.163484	0.545957	1.12093	2	0.670533	0.92064	0.832578	2	0.284772	0.690657	1.08745	2	0.69803
392	XP_002295320.1	1101	40613.3	VITNLYK;YGNTSAASIPLALDEAVR	1;1	2	3	143281;303208;303211	EED87386.1	3-oxoacyl-synthase [Thalassiosira pseudonana CCMP1335]	1.41992	3	0.039996	0.183391	1.17345	3	0.19638	0.5686	1.29293	3	0.154785	0.439695	1.08698	3	0.717928	0.905182	1.29156	3	0.0884912	0.353028	1.13755	3	0.378962	0.758324	1.22446	3	0.158884	0.538931	1.09244	3	0.707229	0.936167	0.946565	3	0.562144	0.879877	1.19391	3	0.326067
393	EED89696.1	1256	40461.4	LVFDI;DYCDISVAVASPNGLVVPVLR	1;1	2	6	15702;15703;15706;15707;15708;357161	XP_002293235.1	predicted protein, partial [Thalassiosira pseudonana CCMP1335]	1.14405	6	0.327167	0.645028	1.13753	6	0.0274973	0.182169	0.599882	5	0.00179982	0.018956	0.696596	6	0.0454954	0.222779	1.17156	6	0.155584	0.48258	1.31376	6	0.0186981	0.122834	0.731003	6	0.0123988	0.113866	0.777087	6	0.122688	0.42294	0.670942	6	0.0238976	0.21384	1.00468	6	0.965303
394	XP_002295471.1	498	39825.5	DFALSGLR;LNDLCQISSQTQLLVER	1;1	2	3	63876;323269;323276	ACI64188.1;EJK67284.1	predicted protein, partial [Thalassiosira pseudonana CCMP1335]	0.913256	3	0.684232	0.883744	0.870417	3	0.188381	0.558327	1.04182	3	0.811019	0.931534	0.977044	3	0.925307	0.97334	0.838687	3	0.209479	0.557475	0.781006	3	0.130687	0.450645	0.972992	3	0.815918	0.958226	0.919361	3	0.553245	0.872779	1.12727	3	0.50295	0.850056	1.08422	3	0.713229
395	EED94749.1	197	38713.5	HLPEMAK;IFIDGEAGTTGLQVR	1;1	2	3	135257;254969;254976	XP_002287306.1;EJK76291.1	n-acetyl-gamma-glutamyl-phosphate reductase, urea cycle [Thalassiosira pseudonana CCMP1335]	3.06695	3	0.0001	0.00219734	1.32358	3	0.181682	0.549299	2.98172	3	0.00029997	0.00478094	1.30297	3	0.226077	0.586175	1.08606	3	0.616538	0.893187	1.13028	3	0.665333	0.903421	1.08131	3	0.511349	0.865064	1.14211	3	0.589941	0.885224	0.983767	3	0.90461	0.977215	2.00583	3	0.00069993
396	XP_002295291.1	1637	38519.2	AMVGSFLAR;VWGPGDGRPVSELK	1;1	2	3	82887;82889;295645	EED87357.1	hypothetical protein THAPSDRAFT_264946, partial [Thalassiosira pseudonana CCMP1335]	0.561288	3	0.00449955	0.0377125	0.812294	3	0.0764924	0.345462	0.65391	3	0.0579942	0.233142	0.929304	3	0.769823	0.923583	0.702003	3	0.0814919	0.341357	0.603694	3	0.0157984	0.107717	0.843016	3	0.431757	0.806185	0.725612	3	0.0565943	0.270689	1.18252	3	0.391861	0.773351	0.745576	3	0.0319968
397	XP_002292529.1	1297	38440.8	IADFGFAK;TLGEGAFSVVIEATK	1;1	2	4	148935;299804;299806;299807	EED90504.1	myosin light chain kinase [Thalassiosira pseudonana CCMP1335]	1.15425	4	0.191681	0.477084	1.09906	4	0.216078	0.589067	1.07496	4	0.667633	0.88153	1.08295	3	0.539246	0.837691	1.1001	4	0.649635	0.908076	1.05444	4	0.633837	0.896678	1.0645	4	0.725527	0.934424	1.0312	4	0.766823	0.947806	0.966828	4	0.639436	0.90655	1.04275	4	0.714029
398	EJK61860.1	786	37764.8	GAVEIIFR;LLFAYAEATVPK	1;1	2	2	70260;265008	XP_002289081.1;EED94517.1;EJK67579.1	hypothetical protein THAOC_17573 [Thalassiosira oceanica]	0.669534	2	0.148785	0.422888	1.01689	2	0.932507	0.975829	0.576624	2	0.110889	0.355991	0.910952	2	0.707629	0.903334	1.25295	2	0.363664	0.732621	1.14453	2	0.628637	0.896678	1.13307	2	0.555244	0.876249	1.04918	2	0.860514	0.969879	0.912692	2	0.59754	0.892299	0.679771	2	0.0770923
399	EJK49332.1	1785	37488.3	FVDLTADIR;WGVVHAK	1;1	2	6	110850;110876;126180;126184;126185;126194	-	hypothetical protein THAOC_31798 [Thalassiosira oceanica]	1.14694	6	0.110589	0.34932	0.758346	6	0.164384	0.529909	1.40421	6	0.00839916	0.0595547	0.89756	6	0.639536	0.889231	0.612701	6	0.0059994	0.0565074	0.417836	6	0.00089991	0.0142091	0.76966	6	0.0247975	0.177831	0.594991	5	0.00109989	0.0173667	1.21857	6	0.00239976	0.0469518	1.52719	6	0.0519948
400	XP_002288244.1	294	37392.6	DLVVELSR;SYMTGSTSTSIWK	1;1	2	2	76926;287889	EED93680.1;EJK57575.1;XP_002288243.1;EED93679.1	succinoaminoimidazolecarboximide ribonucleotide synthetase [Thalassiosira pseudonana CCMP1335]	1.18374	2	0.723528	0.901779	1.2312	2	0.424258	0.733697	0.837252	2	0.70313	0.895383	0.909126	2	0.728327	0.907011	0.965209	2	0.884012	0.978067	0.734523	2	0.267173	0.642072	0.723736	2	0.139486	0.521353	0.541228	2	0.0331967	0.193124	0.771975	2	0.134487	0.502232	0.952638	2	0.820618
401	XP_002286220.1	466	37269.5	GTIWDLDVCR;DHILLGGGQEAMSVTTTSGK	1;1	2	4	168271;168274;168279;346220	EED95861.1	predicted protein, partial [Thalassiosira pseudonana CCMP1335]	0.895557	4	0.285471	0.604488	0.918515	4	0.39816	0.718203	0.844737	4	0.19848	0.504634	0.865673	4	0.194481	0.537235	0.725212	4	0.107189	0.399241	0.651639	3	0.0236976	0.145088	0.711377	4	0.254375	0.677315	0.573843	4	0.0442956	0.232455	0.969308	4	0.783322	0.945559	1.00322	4	0.971303
402	EJK46875.1	1059	37015.9	LGQSALDHSK;DILNNTLEQTK	1;1	2	3	204249;204263;258051	XP_002287052.1;EED96693.1	hypothetical protein THAOC_34435 [Thalassiosira oceanica]	1.06318	3	0.649135	0.869388	1.0247	3	0.915308	0.969087	1.08458	3	0.629737	0.862318	1.05164	3	0.70183	0.903334	1.0713	3	0.725827	0.931304	0.881539	3	0.707629	0.922717	1.13341	3	0.29787	0.712538	0.943589	3	0.79912	0.952951	1.04258	3	0.745725	0.926988	1.04752	3	0.841116
403	XP_002295058.1	577	36971	LVPHLAPGGR;FLDAGTGSHSLR	1;1	2	2	101252;176592	EED87838.1	predicted protein [Thalassiosira pseudonana CCMP1335]	0.914819	2	0.743326	0.907131	1.06547	2	0.864314	0.949593	0.921931	2	0.809319	0.930884	1.09452	2	0.716528	0.905182	0.707518	2	0.188481	0.527915	0.732889	2	0.264274	0.640232	0.744164	2	0.172983	0.561674	0.774797	2	0.339566	0.726776	1.03833	2	0.851715	0.966028	0.873942	2	0.70063
404	EED92040.1	1514	36931.3	AAIANLIPSSTGAAK;VISWYDNEWGYSNR	1;1	2	43	276807;276812;276813;276814;276815;276816;276817;276818;276819;276820;276821;276822;276823;276824;276825;276826;276827;276828;276829;276830;276831;276832;276833;293512;293513;293514;293515;293516;293522;293523;293524;293525;293526;293527;330750;330751;330752;330753;330754;330755;330756;330757;330759	XP_002290288.1	glyceraldehyde-3-phosphate dehydrogenase [Thalassiosira pseudonana CCMP1335]	0.93514	43	0.0254975	0.13241	1.1382	43	0.00019998	0.00621317	1.01471	40	0.732627	0.905344	1.33877	43	0.0001	0.00261133	0.868329	42	0.00019998	0.00553483	0.758782	43	0.0001	0.00239976	0.990385	40	0.838616	0.962697	0.835313	38	0.00019998	0.00473637	1.13067	41	0.00359964	0.0629063	0.824827	42	0.0001
405	EJK44669.1	1084	36163.8	TLSDFALGK;HLPLLDEDGGVVGIVSIK	1;1	2	6	175232;175239;336771;336772;336775;336776	-	hypothetical protein THAOC_36775, partial [Thalassiosira oceanica]	0.864972	6	0.163584	0.446502	1.05954	6	0.252875	0.632252	0.967895	6	0.845915	0.939443	1.19703	6	0.140986	0.442607	0.860552	6	0.150385	0.477147	0.748474	6	0.00349965	0.037948	0.997937	6	0.971803	0.993867	0.878433	6	0.0746925	0.333614	1.13499	6	0.146485	0.52483	0.888595	5	0.106889
406	EJK66758.1	947	35771.6	VELWLGPIR;NLPLQQIQGGNSR	1;1	2	8	120815;120818;120823;120831;120832;120833;220282;220294	-	hypothetical protein THAOC_12288 [Thalassiosira oceanica]	2.06822	8	0.00049995	0.00763483	1.49046	8	0.00039996	0.0105989	1.41211	8	0.0429957	0.186142	0.994431	7	0.956504	0.987138	1.28586	8	0.00079992	0.013576	1.22364	8	0.0243976	0.148364	0.934989	8	0.251375	0.674865	0.90353	6	0.145285	0.468663	0.74448	8	0.0059994	0.089991	1.25805	8	0.0674933
407	XP_002296775.1	792	35623.1	FDQSLIMEVR;SYDGLSGEGTVVFSR	1;1	2	6	169242;169247;254299;254300;254301;254302	EED86976.1	predicted protein [Thalassiosira pseudonana CCMP1335]	1.97903	5	0.00089991	0.0113401	1.49881	6	0.00049995	0.0123412	1.54226	5	0.00469953	0.0391845	1.45153	5	0.00109989	0.0154844	0.998189	6	0.986101	0.994138	1.2505	6	0.0706929	0.309604	1.02853	6	0.624938	0.902934	1.31087	6	0.00959904	0.0807396	1.01766	6	0.814019	0.952716	1.11674	6	0.166383
408	AFO84283.1	280	35595.7	REGVSLWER;VINTWADIINR	1;1	2	15	135729;192591;192596;192605;192606;192610;192611;192618;192623;192624;192625;192628;192629;192632;192654	AFO84278.1;AIR76210.1;ADB27608.1;YP_874574.1;YP_004072655.1;sp|A0T0W2.1|PSBA_THAPS;YP_874620.1;AIR75891.1;AIR75521.1;YP_004072608.1;YP_009093264.1;AIR75475.1;ABK20843.1;ABK20797.1;AIR75937.1;ADB27561.1;AIR75616.1;AIR76164.1;YP_009093218.1;YP_009093491.1;AIR75662.1;YP_009093537.1	photosystem II protein D1, partial (chloroplast) [Stephanodiscus hantzschii]	0.458274	15	0.0001	0.00219734	0.757714	14	0.00029997	0.00858009	0.348562	15	0.0001	0.00211861	0.616589	15	0.00089991	0.0141012	1.42392	15	0.00209979	0.0279816	1.49855	15	0.00209979	0.0266171	1.15189	15	0.0408959	0.247626	1.18234	14	0.0193981	0.132762	0.830109	15	0.0141986	0.152128	0.640672	15	0.0001
409	EJK59733.1	581	35430.2	GLIDTVVGK;IPGGAALFFK	1;1	2	3	159369;195240;195241	-	hypothetical protein THAOC_20006 [Thalassiosira oceanica]	1.38153	3	0.0526947	0.220828	1.33052	3	0.070093	0.329785	1.65372	3	0.0242976	0.12758	1.65557	3	0.00419958	0.042755	0.789298	3	0.113589	0.411159	0.939177	3	0.658534	0.903421	0.969424	3	0.792321	0.955652	1.17493	3	0.270573	0.653126	1.19842	3	0.0879912	0.414097	0.997552	3	0.988701
410	EED93454.1	1097	35125.7	DNMMVLGITQR;INNFIDVTDFK	1;1	2	2	182041;265464	XP_002289917.1	predicted protein [Thalassiosira pseudonana CCMP1335]	1.09661	2	0.733727	0.90617	1.25711	2	0.233777	0.60779	0.895773	2	0.743026	0.909188	1.07745	2	0.766623	0.922936	1.41352	2	0.167483	0.501335	1.30698	2	0.336666	0.716311	1.20497	2	0.381262	0.773518	1.12667	2	0.656634	0.915893	0.874988	2	0.439356	0.807805	0.865642	2	0.49865
411	XP_002286434.1	1585	34363.9	MCSVIFANDISGVR;AVITTSTEDGDLVYVIR	1;1	2	2	253212;303749	EED96075.1	predicted protein [Thalassiosira pseudonana CCMP1335]	1.14779	2	0.608739	0.852329	1.66862	2	0.0130987	0.113354	0.72982	2	0.336266	0.665512	1.15448	2	0.555644	0.848579	1.44634	2	0.142086	0.463906	1.91106	2	0.0291971	0.167907	0.978157	2	0.913509	0.984139	1.30516	2	0.317268	0.704837	0.702709	2	0.0489951	0.315129	0.679201	2	0.0764924
412	XP_002295206.1	117	34361.2	VTASQAALLQK;GPTGCDPGQTAFFQTLQIATK	1;1	2	6	222536;222546;222547;222549;356974;356976	EED87510.1	predicted protein [Thalassiosira pseudonana CCMP1335]	1.15161	4	0.182382	0.465216	1.04983	6	0.50325	0.79479	1.03637	6	0.662634	0.879856	0.97732	6	0.839016	0.948499	0.735209	4	0.0155984	0.114803	0.624547	6	0.0107989	0.0827151	0.719548	6	0.0009999	0.0179982	0.605296	6	0.0109989	0.0887804	0.960009	6	0.383562	0.768832	1.07875	6	0.478352
413	XP_002294888.1	769	33717	VLVIGGGDGGVLR;KVLVIGGGDGGVLR	1;1	2	5	161279;161286;161287;161295;268260	EED87668.1	spermine synthase [Thalassiosira pseudonana CCMP1335]	1.38175	3	0.0525947	0.220828	1.15204	4	0.227977	0.602097	1.15173	5	0.277072	0.596899	0.775671	5	0.534447	0.837691	0.849497	5	0.312469	0.688886	1.35588	5	0.262974	0.640232	0.74631	5	0.221078	0.635535	1.20143	5	0.40266	0.780179	0.878386	5	0.405859	0.782874	1.04745	4	0.828017
414	XP_002297003.1	653	33702.8	AVTTVEFAPR;GVLDVAWAPNVGR	1;1	2	3	123054;202661;202664	EED86731.1	predicted protein, partial [Thalassiosira pseudonana CCMP1335]	0.86231	3	0.317868	0.637151	0.896803	3	0.314869	0.679944	0.689703	3	0.107289	0.348787	0.721191	3	0.0820918	0.318813	1.43189	3	0.0890911	0.353028	1.24118	3	0.277672	0.654523	1.2012	3	0.437456	0.808441	1.0508	3	0.843416	0.966973	0.845038	3	0.107389	0.458058	0.991061	3	0.937706
415	EED96333.1	512	33492.5	SSPFFLAIR;ELLLLSSVTNR	1;1	2	4	107473;171575;171576;171577	XP_002286692.1	predicted protein [Thalassiosira pseudonana CCMP1335]	1.25126	4	0.325567	0.643987	1.12042	4	0.354065	0.692196	0.763533	3	0.139686	0.41107	0.884294	4	0.692031	0.898443	1.5248	4	0.00259974	0.0313888	1.3099	3	0.105389	0.398532	1.2186	4	0.283172	0.702176	1.25756	4	0.181982	0.53263	0.808697	4	0.29837	0.701131	1.25535	3	0.0811919
416	EJK71347.1	736	33228.4	GYMEPMLK;YIDPTYTYK	1;1	2	6	180595;180624;180626;180631;180637;230538	EED92086.1;XP_002290334.1	hypothetical protein THAOC_07228 [Thalassiosira oceanica]	1.52523	6	0.00309969	0.0295537	1.1291	5	0.0643936	0.311092	2.22076	6	0.00089991	0.0111009	1.67031	5	0.00039996	0.00750758	0.482723	5	0.0001	0.0035271	0.493308	6	0.0001	0.00239976	0.708912	5	0.00079992	0.0153176	0.740969	6	0.0161984	0.116164	1.40292	6	0.00049995	0.0157879	1.3692	6	0.0361964
417	EJK75781.1	1802	33014.9	NPYMGFADFR;AQQLENWANQQEVR	1;1	2	3	162831;167829;281318	-	hypothetical protein THAOC_02488 [Thalassiosira oceanica]	1.88489	3	0.0375962	0.175061	1.49986	3	0.19948	0.574348	1.58526	3	0.0326967	0.156676	1.28614	3	0.345565	0.697726	1.53789	3	0.0924908	0.360153	1.89056	3	0.0885911	0.358346	1.34588	3	0.0319968	0.210968	1.68939	3	0.0069993	0.0652784	0.869234	3	0.50405	0.851116	1.23241	3	0.130987
418	ACI64369.1	505	32924.8	QQEIILWR;ELLPPGSLYDTR	1;1	2	3	121669;204407;204408	XP_002295652.1	predicted protein, partial [Thalassiosira pseudonana CCMP1335]	1.24705	3	0.141886	0.409741	1.10952	3	0.307669	0.676122	0.938687	3	0.712229	0.895383	0.862059	3	0.253175	0.612426	1.38398	3	0.0413959	0.222302	1.10055	3	0.505549	0.846718	1.09544	3	0.445855	0.816406	0.873414	3	0.352865	0.738698	0.811185	3	0.0553945	0.336488	1.10711	3	0.385961
419	XP_002295020.1	1310	32574	LIIPSLQVNLR;VYVGHDYQPGGR	1;1	2	6	178428;201006;201007;201026;269709;269712	EED87800.1	THAPSDRAFT_30659 [Thalassiosira pseudonana CCMP1335]	1.00313	6	0.966303	0.98641	1.23019	5	0.0749925	0.34303	1.514	6	0.0130987	0.0845546	1.69485	6	0.0320968	0.176886	0.589058	5	0.0001	0.0035271	0.713159	6	0.0647935	0.293036	0.960625	6	0.725427	0.934424	1.10299	6	0.610939	0.896243	1.42364	6	0.0128987	0.14511	1.01224	5	0.917208
420	EJK63103.1	43	32288.5	LLDIIPENTPLEASFR;ESGALTVAIVTKPFAFEGR	1;1	2	2	300166;345698	ACI65054.1;XP_002296337.1	hypothetical protein THAOC_16262, partial [Thalassiosira oceanica]	1.24655	2	0.415658	0.722465	1.02082	2	0.915008	0.969087	0.870052	2	0.675632	0.887538	0.719799	2	0.181482	0.517453	2.16067	2	0.00519948	0.0508362	2.41299	2	0.00539946	0.051697	1.58533	2	0.0409959	0.247626	1.80361	2	0.039996	0.215547	0.734211	2	0.080292	0.405971	1.23575	2	0.321568
421	EJK69747.1	1794	32222.5	HYGALQGLDK;HGKDQVLIWR	1;1	2	9	215591;215595;215596;215603;215604;215605;215606;215609;250673	-	hypothetical protein THAOC_08963 [Thalassiosira oceanica]	1.14458	9	0.00809919	0.0552831	0.858141	6	0.0120988	0.106351	1.81201	7	0.0001	0.00211861	1.32084	9	0.00139986	0.0186855	0.471482	7	0.0001	0.0035271	0.5368	9	0.00019998	0.0040905	0.817162	9	0.00609939	0.0681919	0.815377	9	0.00289971	0.0352667	1.43217	9	0.00079992	0.0224978	1.25763	9	0.00219978
422	EED89527.1	329	31831.2	LATVTGPVSHLLR;LDLSQMVMLK	1;1	2	2	205185;233915	XP_002293066.1	nicotinate-nucleotide pyrophosphorylase, partial [Thalassiosira pseudonana CCMP1335]	1.53196	2	0.279872	0.597547	1.21428	2	0.313869	0.679944	1.49992	2	0.315568	0.642801	1.23104	2	0.390561	0.734603	0.936261	2	0.789721	0.949004	0.54709	2	0.0752925	0.319638	0.948183	2	0.79682	0.955652	0.553682	2	0.0829917	0.349031	1.00673	2	0.970103	0.990105	1.18453	2	0.619238
423	XP_002287546.1	53	31783	YNSGLIGGMR;EVGFVNLCTVGLLPR	1;1	2	5	116091;120944;273910;273961;273962	EED94989.1	phosphate transport protein [Thalassiosira pseudonana CCMP1335]	0.811868	5	0.143086	0.411886	1.10246	5	0.120788	0.449717	0.680151	4	0.0238976	0.126216	0.822076	5	0.339266	0.696307	1.3574	5	0.0909909	0.356629	1.03186	3	0.824418	0.955539	0.985838	3	0.906609	0.980924	0.720169	5	0.0393961	0.214573	0.77514	5	0.0812919	0.408959	0.76101	5	0.0157984
424	EED86636.1	561	31338.8	QMLALHLR;IRPEVFDK	1;1	2	3	91316;91325;190912	XP_002296908.1	predicted protein, partial [Thalassiosira pseudonana CCMP1335]	1.077	3	0.726627	0.901779	0.778451	3	0.0420958	0.24313	1.23584	3	0.223478	0.528887	0.883605	3	0.510849	0.822976	0.966388	3	0.909509	0.981636	0.766945	3	0.338166	0.71696	1.1474	3	0.411859	0.797146	0.924033	3	0.609439	0.896243	1.16361	3	0.176682	0.571914	1.40204	3	0.154385
425	EED89327.1	87	30581.5	LIIAGAPASGK;LVPDEVIIGVVK	1;1	2	7	189353;189354;189355;189356;256533;256534;256535	XP_002293591.1;EJK62708.1	predicted protein [Thalassiosira pseudonana CCMP1335]	1.64287	6	0.0001	0.00219734	1.76498	7	0.00059994	0.0138602	1.90067	7	0.00019998	0.00360164	2.21216	7	0.00029997	0.00607355	0.812687	7	0.0829917	0.342515	0.927099	7	0.370663	0.752965	1.02686	7	0.59574	0.897502	1.18972	7	0.0128987	0.0995645	1.23326	7	0.010399	0.128206	0.870297	7	0.162484
426	EED92024.1	913	30340.9	LLANTMSSYR;STMGAYIASGTVK	1;1	2	2	148494;257491	XP_002290272.1	proteasome subunit beta type 5 precursor [Thalassiosira pseudonana CCMP1335]	0.770618	2	0.335966	0.654499	1.02606	2	0.893611	0.961006	0.770242	2	0.420458	0.725325	1.04076	2	0.873513	0.961558	1.03783	2	0.917608	0.985058	0.76285	2	0.586441	0.883343	1.07366	2	0.794821	0.955652	0.799032	2	0.617638	0.898746	1.02745	2	0.876612	0.971017	0.778172	2	0.242876
427	EED96710.1	289	30142.4	GVEVNIMR;DQGIGGFYR	1;1	2	2	77661;99993	XP_002287069.1	predicted protein [Thalassiosira pseudonana CCMP1335]	0.386496	2	0.00379962	0.0337286	0.691795	2	0.0610939	0.302448	0.12352	2	0.0001	0.00211861	0.228123	2	0.00029997	0.00607355	1.92107	2	0.0156984	0.114803	0.997187	2	0.993301	0.99911	0.671098	2	0.070393	0.359454	0.3405	2	0.00119988	0.0183033	0.370677	2	0.0001	0.0049995	0.583393	2	0.0206979
428	EJK60384.1	1792	30063.4	FLINQSNFIIK;SILMYQQNLDK	1;1	2	2	267689;273745	-	hypothetical protein THAOC_19273 [Thalassiosira oceanica]	1.23126	2	0.439156	0.741291	0.855491	2	0.416658	0.728926	1.24792	2	0.494251	0.779989	0.864804	2	0.551045	0.847039	0.982489	2	0.943006	0.990535	0.705634	2	0.210879	0.575942	1.03627	2	0.862914	0.975044	0.751238	2	0.283372	0.660321	1.04115	2	0.815318	0.952716	1.4482	2	0.0880912
429	XP_002294653.1	899	30003	FGFDQATGWNR;GYWHLGEEGTVLDVMR	1;1	2	4	188321;188322;305068;336826	EED88013.1	mitochondrial alternative oxidase [Thalassiosira pseudonana CCMP1335]	0.81382	4	0.218378	0.51373	0.9304	4	0.459554	0.761837	0.623067	4	0.0260974	0.133907	0.666928	3	0.0126987	0.0941692	1.29706	4	0.0787921	0.335099	1.2097	3	0.221678	0.590309	1.04588	4	0.616338	0.902934	0.854215	4	0.218278	0.589941	0.815903	4	0.020198	0.195464	0.902472	4	0.242176
430	XP_002287620.1	855	29947.4	LCYDMK;SNEMCSQYAPITWQVDR	1;1	2	4	136270;136281;136289;330019	EED95063.1;XP_002290131.1;EED91883.1;BAO52718.1	predicted protein [Thalassiosira pseudonana CCMP1335]	3.8184	3	0.0001	0.00219734	1.40683	4	0.00269973	0.0377125	2.22614	4	0.00259974	0.0253088	1.00475	4	0.959504	0.987965	2.17205	4	0.0001	0.0035271	3.52553	4	0.0130987	0.0946893	1.59707	4	0.00039996	0.00959904	2.64971	4	0.0152985	0.11194	0.677412	3	0.00209979	0.0429503	2.18327	4	0.00779922
431	EJK55364.1	967	29942.6	IIFGGQQLQDGK;TVDDYNIGDDATLHLVLR	1;1	2	3	261239;324684;324688	-	hypothetical protein THAOC_24909 [Thalassiosira oceanica]	1.03542	3	0.788721	0.933208	0.982409	3	0.913609	0.969087	1.04716	3	0.786521	0.921018	0.998081	3	0.9957	0.9995	1.06981	3	0.60024	0.88729	1.29002	3	0.121688	0.429215	1.12963	3	0.582842	0.889987	1.38031	3	0.251275	0.629937	1.04698	3	0.777022	0.945559	1.07102	3	0.729427
432	XP_002289514.1	562	29555.5	ATVIGANNQAGK;RYDSSTTTFSPEGR	1;1	2	11	225824;225825;225828;225833;225834;260246;260247;260248;260250;260251;310641	EED93051.1;EJK61739.1	20S proteasome subunit PAC1 [Thalassiosira pseudonana CCMP1335]	1.0464	11	0.671133	0.877766	0.902537	11	0.0605939	0.3008	1.05885	11	0.750125	0.912205	0.983902	10	0.829517	0.945073	0.932201	11	0.126787	0.435287	0.802429	11	0.00249975	0.0296023	0.961858	11	0.639136	0.906141	0.832973	11	0.0437956	0.231859	1.07419	10	0.168283	0.556819	1.1686	11	0.0882912
433	XP_002295570.1	239	29391.4	IQYGGSMK;EDWANVSIAYEPVWAIGTGLTATPEMAQETHANIR	1;1	2	6	153483;153485;158568;158577;158578;370163	ACI64287.1	triose-phosphate isomerase [Thalassiosira pseudonana CCMP1335]	0.859194	6	0.0366963	0.173107	0.693309	6	0.0534947	0.284804	0.881771	6	0.376462	0.694339	0.607626	5	0.00139986	0.0186855	0.941149	6	0.80152	0.95303	0.997805	6	0.992401	0.99911	1.00351	6	0.979102	0.99436	1.08445	6	0.579142	0.879475	1.05681	6	0.615938	0.897724	1.26523	6	0.111489
434	YP_004072619.1	57	28973.2	YLLPDPIGTLK;LWLLPNTAGSQTAEDAIR	1;1	2	5	245987;316413;316414;316421;316422	ADB27572.1;YP_009093259.1;AIR75932.1;EED86143.1;XP_002297558.1;YP_874615.1;ABK20838.1;sp|A0T103.1|THIG_THAPS	thiazole biosynthesis protein ThiG (chloroplast) [Thalassiosira oceanica CCMP1005]	1.1903	5	0.224578	0.522179	1.07767	5	0.561844	0.829191	1.35912	5	0.0191981	0.107046	1.19061	5	0.105689	0.37016	0.786604	5	0.0138986	0.104182	0.87237	5	0.329967	0.713014	0.889617	5	0.118088	0.47766	0.991102	5	0.945205	0.987969	1.16249	4	0.0624938	0.359391	1.10883	5	0.149985
435	EED95973.1	1635	28558.4	LDILVNNVGTNIR;TNLESVFELTK	1;1	2	3	59309;256468;256469	XP_002286332.1	predicted protein, partial [Thalassiosira pseudonana CCMP1335]	1.19621	3	0.407759	0.718262	1.34887	3	0.0386961	0.229376	1.08711	3	0.661134	0.879856	1.29951	3	0.0693931	0.292848	1.22531	3	0.157384	0.48399	1.06863	3	0.641136	0.900191	1.15831	3	0.317968	0.728161	1.02082	3	0.882312	0.970166	0.952675	3	0.621238	0.89962	0.859276	3	0.247675
436	EED93895.1	1376	28505.8	SIEPWLQTK;DLVPDMGNFYEQYR	1;1	2	3	215639;286833;286834	XP_002288459.1	precursor of hydrogenase, partial [Thalassiosira pseudonana CCMP1335]	0.866457	3	0.526547	0.809745	0.92322	3	0.686731	0.88964	1.01488	3	0.951805	0.974796	1.08868	3	0.731327	0.907606	0.612481	3	0.00619938	0.0580869	0.642128	3	0.0733927	0.31454	0.738602	3	0.0418958	0.252216	0.780184	3	0.116988	0.415723	1.16727	3	0.380862	0.766583	0.955657	3	0.69953
437	EED92505.1	681	28309.1	LLADNFK;DGLPVMALVELVSSAPR	1;1	2	7	133647;288079;288081;290548;290557;290569;290575	XP_002290753.1	v-type h-atpase subunit, partial [Thalassiosira pseudonana CCMP1335]	0.48227	6	0.00069993	0.0095551	1.14639	7	0.355264	0.692843	0.464985	4	0.00109989	0.0129471	1.10448	7	0.652635	0.890271	1.17322	7	0.119788	0.425887	1.15543	6	0.0633937	0.290353	1.11497	6	0.284772	0.702176	1.20148	6	0.0232977	0.15305	1.02374	6	0.611839	0.895374	0.457345	6	0.0001
438	EED89294.1	1600	28285.7	EIVALLGAHALGR;FNPEASWGANAGLDLPR	1;1	2	8	193924;193925;193926;193931;193932;297861;297865;297867	XP_002293558.1	predicted protein, partial [Thalassiosira pseudonana CCMP1335]	1.31324	8	0.0149985	0.0903923	1.12507	8	0.0993901	0.406021	1.65259	8	0.00069993	0.0090041	1.32465	7	0.00059994	0.010199	0.933936	8	0.212079	0.558609	0.942047	8	0.635936	0.896678	1.22648	7	0.00449955	0.0550965	1.21294	8	0.0375962	0.207587	1.21136	8	0.0231977	0.210733	1.12668	8	0.194481
439	EED88807.1	463	28192.1	AQIGVVAGGGR;GSGCFAVVISHDEDKGTTR	1;1	2	5	92101;92104;92112;92113;348120	XP_002293798.1;EJK66415.1	RL8, ribosomal protein 8, partial [Thalassiosira pseudonana CCMP1335]	0.592827	5	0.10179	0.330496	0.860583	4	0.0750925	0.34303	0.542784	5	0.19918	0.504634	0.700516	5	0.252875	0.612426	1.14595	5	0.422858	0.775455	0.992858	4	0.945805	0.987035	0.934249	4	0.606439	0.902141	1.01733	5	0.90321	0.975726	0.953529	5	0.744026	0.926988	0.848875	3	0.179282
440	XP_002287533.1	1768	28049.1	QSYAEITATQR;LYEGMQALEAK	1;1	2	6	178921;253945;253952;250825;250826;250833	EED94976.1;EJK65858.1	predicted protein [Thalassiosira pseudonana CCMP1335]	0.987914	6	0.881312	0.972895	0.969287	6	0.590341	0.850931	1.05497	6	0.587841	0.839573	1.03547	6	0.706729	0.903334	0.837686	6	0.264874	0.624518	0.871014	6	0.379162	0.758324	0.924723	6	0.544546	0.871938	0.869824	5	0.19678	0.559565	1.08975	4	0.235576	0.635326	1.04951	4	0.576442
441	ADB27587.1	588	27553.7	GLGLAAQNSNILK;SNPELFSNPHTIPK	1;1	2	2	260225;307915	YP_004072634.1	50S ribosomal protein L5 (chloroplast) [Thalassiosira oceanica CCMP1005]	0.601049	2	0.0765923	0.279391	1.0147	2	0.940506	0.978972	0.49391	2	0.0489951	0.205688	0.886707	2	0.624338	0.885174	0.660195	2	0.10149	0.383572	0.90793	2	0.730127	0.93565	0.57795	2	0.0167983	0.140637	0.787686	2	0.374663	0.757744	0.8795	2	0.456654	0.821704	0.619348	2	0.0343966
442	XP_002293303.1	730	27528.8	NSLPDSVVVQR;QIVGGQALVGSYCK	1;1	2	2	161852;292759	EED89039.1;EJK77364.1	eukaryotic translation initiation factor 6 [Thalassiosira pseudonana CCMP1335]	0.908323	2	0.723528	0.901779	0.692997	2	0.0622938	0.305036	1.19663	2	0.583042	0.837997	0.895995	2	0.656334	0.891065	0.621665	2	0.0720928	0.314794	0.645001	2	0.118888	0.425445	0.847018	2	0.435756	0.807512	0.890343	2	0.666033	0.918363	1.31948	2	0.111889	0.462339	1.34734	2	0.164084
443	ACI64755.1	1588	27389.8	GYAPYAK;IADFGVSSWLIDSGNR	1;1	2	2	118040;285195	XP_002296038.1	protein kinase MAPKKKK, MAP4K-like protein, partial [Thalassiosira pseudonana CCMP1335]	0.853505	2	0.554145	0.823222	1.15556	2	0.590641	0.850931	1.06483	2	0.920408	0.962633	1.50292	2	0.10289	0.366039	0.84944	2	0.509549	0.828823	0.917446	2	0.776922	0.943972	1.08068	2	0.757424	0.943136	1.18325	2	0.525947	0.854185	1.25506	2	0.438756	0.807527	0.751753	2	0.466753
444	XP_002293577.1	1392	26509.3	GTAVDGLPK;KGTAVDGLPK	1;1	2	2	145371;258323	EED89313.1	predicted protein [Thalassiosira pseudonana CCMP1335]	0.976869	2	0.935706	0.984222	1.06757	2	0.735726	0.905833	1.03246	2	0.924708	0.963631	1.13971	2	0.590541	0.865517	0.822895	2	0.433857	0.781166	0.961967	2	0.891111	0.975623	0.904664	2	0.628337	0.903214	1.07119	2	0.79942	0.952951	1.08159	2	0.651035	0.908812	0.926309	2	0.751225
445	EJK56644.1	1479	26401.2	GILENLGF	1;1	2	3	60014;60019;60021	-	hypothetical protein THAOC_23429 [Thalassiosira oceanica]	0.830963	3	0.19848	0.486614	0.919668	3	0.588341	0.850875	0.606323	3	0.0347965	0.163625	0.686927	3	0.131287	0.423106	1.13819	3	0.333967	0.704801	1.09555	3	0.527647	0.856131	0.875821	3	0.524048	0.865197	0.850025	3	0.470553	0.823999	0.782855	3	0.113389	0.4638	0.932462	3	0.550145
446	EJK69435.1	608	26380.2	GVNTFSPEGR;LFQVEYAIEAIK	1;1	2	3	114878;114892;283851	EED88817.1;XP_002293808.1;EJK66699.1	hypothetical protein THAOC_09311 [Thalassiosira oceanica]	1.28487	3	0.182582	0.465216	1.08704	3	0.39996	0.718572	0.892203	3	0.49955	0.782809	0.771547	3	0.0721928	0.299061	1.30801	3	0.0780922	0.334495	1.27677	3	0.134887	0.458971	0.957993	3	0.715928	0.930448	0.937026	3	0.641436	0.906968	0.744441	3	0.0122988	0.142824	1.18329	3	0.352865
447	XP_002294379.1	100	26267.4	SAVVLQIVDAR;NPLFYLSDDLR	1;1	2	2	25014;202302	EED88213.1	predicted protein, partial [Thalassiosira pseudonana CCMP1335]	0.888261	2	0.659934	0.872377	0.860854	2	0.554545	0.828124	0.914958	2	0.79562	0.925473	0.885245	2	0.716728	0.905182	1.00412	2	0.986401	0.994138	0.830786	2	0.505649	0.846718	1.0553	2	0.794821	0.955652	0.880341	2	0.632837	0.906968	1.04536	2	0.79652	0.946361	1.06019	2	0.786521
448	EJK48668.1	1752	26231.3	GGVIGLTMSNAR;VCLVTGASR	1;1	2	7	26868;149713;149714;149736;154668;154677;85753	-	hypothetical protein THAOC_32518, partial [Thalassiosira oceanica]	1.91037	7	0.00309969	0.0295537	1.59709	7	0.00249975	0.0372277	1.52003	7	0.0155984	0.0945885	1.29989	7	0.030397	0.171173	1.45208	7	0.0109989	0.0875532	1.54465	6	0.00049995	0.00891	1.20875	7	0.0476952	0.277836	1.41901	7	0.00849915	0.0753619	0.829961	7	0.00279972	0.0530473	1.17979	7	0.167283
449	EED87666.1	987	26043.1	GGVPGAYPK;VEGSVPLLK	1;1	2	11	141551;141566;141577;141579;141580;141581;141582;227317;227320;171943;171959	XP_002294886.1	predicted protein [Thalassiosira pseudonana CCMP1335]	0.789754	11	0.00019998	0.00367718	0.703014	11	0.0001	0.00353298	0.596302	11	0.0009999	0.011926	0.533728	11	0.00059994	0.010199	1.66262	11	0.0009999	0.0165029	1.4722	10	0.00639936	0.0584713	1.37372	10	0.0001	0.0036731	1.29078	11	0.0329967	0.192838	0.796435	11	0.0304969	0.238672	1.12897	10	0.00159984
450	AIR76108.1	500	25287.2	TTVTLPHGVGK;SGTVSTTLTETLSDFK	1;1	2	6	217786;320470;320473;320475;320476;320477	YP_009093435.1	ribosomal protein L1 (chloroplast) [Thalassiosira weissflogii]	0.777953	6	0.131487	0.389063	0.613814	6	0.115588	0.44223	0.881938	5	0.213879	0.522433	0.614199	6	0.122588	0.406072	0.461395	6	0.00109989	0.0178261	0.615073	6	0.0145985	0.10185	0.545665	5	0.0001	0.0036731	0.645845	6	0.0137986	0.10349	1.03768	6	0.608839	0.893901	1.31737	6	0.446355
451	EED96070.1	334	24337	INWIVNPVHK;YYEVILVDPSHTK	1;1	2	2	243582;305910	XP_002286429.1	RL15, ribosomal protein 15 60S large ribosomal subunit [Thalassiosira pseudonana CCMP1335]	0.567818	2	0.0513949	0.216894	0.716692	2	0.0906909	0.386649	0.356655	2	0.00979902	0.0671028	0.458146	2	0.00729927	0.0626347	1.1708	2	0.524448	0.840144	0.957021	2	0.90031	0.977859	0.80168	2	0.30177	0.714031	0.634154	2	0.0977902	0.375314	0.733924	2	0.079892	0.405086	0.867098	2	0.50335
452	EJK58753.1	1045	24025.1	MALSEGLK;VMLCIGEK	1;1	2	6	142521;142523;142524;174489;174491;179807	-	hypothetical protein THAOC_21096 [Thalassiosira oceanica]	0.936526	6	0.29647	0.613969	0.628428	6	0.0001	0.00353298	0.966092	6	0.711329	0.895383	0.644197	6	0.0001	0.00261133	0.479491	5	0.0001	0.0035271	0.523027	5	0.0001	0.00239976	0.572479	6	0.00019998	0.00571371	0.622443	6	0.00129987	0.019498	1.06513	6	0.40366	0.780438	1.52536	6	0.00039996
453	XP_002292597.1	940	23990	KVYDQMPEPR;QSDVMIVAGTLTNK	1;1	2	3	252897;252907;295003	EED89793.1;EJK59639.1	predicted protein [Thalassiosira pseudonana CCMP1335]	0.850475	3	0.249575	0.557431	0.834904	3	0.108189	0.424743	0.743037	3	0.111789	0.357605	0.732027	3	0.0384961	0.200492	1.07105	3	0.593941	0.882328	1.04137	3	0.774123	0.943972	0.981915	3	0.90381	0.980924	0.962357	3	0.786721	0.9518	0.915468	3	0.352065	0.745096	1.04771	3	0.691531
454	EJK70717.1	1195	23293.9	YEVLDSAK;LDSKYEVLDSAK	1;1	2	3	166510;318754;318759	-	hypothetical protein THAOC_07899 [Thalassiosira oceanica]	1.34301	3	0.189581	0.474479	0.771034	3	0.0364963	0.219221	1.27049	3	0.355164	0.680458	0.728652	3	0.0368963	0.19555	1.04277	3	0.739426	0.93744	1.0622	3	0.833317	0.959674	1.03193	3	0.790121	0.955652	1.06325	3	0.806819	0.955407	0.977473	3	0.809619	0.950094	1.7352	3	0.0019998
455	pdb|3BOJ|A	128	23179.6	FIVDGWAAGK	1;1	2	2	206173;206179	pdb|3BOH|A;pdb|3BOH|B;AAX08632.1	Chain A, Carbonic Anhydrase From Marine Diatom Thalassiosira Weissflo Cadmium Bound Domain 1 Without Bound Metal (Cdca1-R1)	0.599875	2	0.0753925	0.276133	0.922894	2	0.673233	0.884231	0.658268	2	0.206179	0.512885	1.02148	2	0.931607	0.977157	0.645356	2	0.0864914	0.348094	0.565234	2	0.0486951	0.2408	0.737356	2	0.179182	0.569837	0.651785	2	0.115888	0.415536	1.11665	2	0.525447	0.86667	0.6749	2	0.0734927
456	EED89280.1	1249	22743.2	SWYESHYGVK;LDSGNFSWGTEVCTR	1;1	2	5	251354;251359;283887;283888;283889	XP_002293544.1	RS8, ribosomal protein 8 [Thalassiosira pseudonana CCMP1335]	0.693849	5	0.0453955	0.201982	0.86852	5	0.184582	0.555285	0.598323	4	0.00529947	0.0426087	0.655235	5	0.00539946	0.049642	0.98541	5	0.945005	0.990535	0.920248	5	0.690731	0.909916	0.692497	4	0.00269973	0.037965	0.721537	5	0.0275972	0.170705	0.725089	4	0.0114988	0.137072	0.828683	5	0.10139
457	ACI64326.1	906	22711.4	FLPHIEQK;TYEAITHYGEAIK	1;1	2	5	192865;295454;295455;295459;295460	sp|B5YM03.1|CYNS_THAPS;XP_002295609.1	cyanate lyase [Thalassiosira pseudonana CCMP1335]	1.06204	3	0.654135	0.8711	0.715025	5	0.00459954	0.0560025	1.3367	3	0.117588	0.371518	0.987143	3	0.919208	0.97334	0.649364	4	0.0019998	0.0270499	0.748693	4	0.0461954	0.23162	0.992356	5	0.950705	0.991148	0.852584	4	0.155384	0.483371	1.3521	5	0.0530947	0.328421	1.31334	4	0.0134986
458	AAZ99425.1	323	22504.5	ILTDYGFEGHPLR;DFPLSGFVEMK	1;1	2	5	242100;242149;242150;242151;254368	YP_316618.1;YP_009186127.1;ALO71440.1	NADH dehydrogenase subunit 9 (mitochondrion) [Thalassiosira pseudonana]	1.21414	5	0.220178	0.514605	1.21126	5	0.0132987	0.113354	1.02419	4	0.875012	0.949336	1.26993	4	0.0350965	0.187667	1.38656	4	0.0365963	0.207034	1.49695	5	0.109989	0.408949	1.3473	4	0.0127987	0.115188	1.56565	5	0.138186	0.453069	0.966924	4	0.640136	0.90655	0.985353	3	0.89891
459	EED94420.1	250	22318.5	EISYVDIMR;SGIYYFNEDQK	1;1	2	9	133831;133835;133836;133837;133838;133839;133840;272686;272687	XP_002288984.1	probable peptide methionine sulfoxide reductase, partial [Thalassiosira pseudonana CCMP1335]	1.19649	9	0.0792921	0.284064	1.04235	7	0.335766	0.685302	1.22295	9	0.0559944	0.22713	1.13873	8	0.0929907	0.341282	0.909092	9	0.187281	0.527541	0.834219	9	0.0106989	0.0826527	0.961833	9	0.378562	0.772576	0.873222	8	0.0166983	0.118802	1.05012	9	0.29737	0.700611	1.15718	9	0.0723928
460	XP_002292199.1	1131	22308.6	GVTLYVSNFERPLTER;DFFTEPSYASVTAVK	1;1	2	2	307464;317563	EED90174.1	predicted protein [Thalassiosira pseudonana CCMP1335]	2.37408	2	0.19578	0.483283	1.33502	2	0.508249	0.79842	2.20186	2	0.238076	0.548306	1.24499	2	0.638036	0.887831	1.18158	2	0.50045	0.825215	0.939794	2	0.823518	0.955539	1.14034	2	0.533647	0.87013	0.916021	2	0.746425	0.940466	0.955752	2	0.792521	0.945559	1.73595	2	0.0186981
461	EJK47917.1	1015	22200.1	VIISAPSADAPMYVVGVNHK;KVIISAPSADAPMYVVGVNHK	1;1	2	18	108948;349707;349709;349711;349712;349714;350446;350447;350449;350450;350451;350452;361078;361079;361080;363660;363661;363663	-	hypothetical protein THAOC_33331 [Thalassiosira oceanica]	0.883587	18	0.0329967	0.16027	0.982046	18	0.705529	0.895081	1.14393	18	0.0283972	0.141671	1.33493	17	0.0001	0.00261133	0.711474	17	0.00039996	0.00827044	0.582686	16	0.0001	0.00239976	0.994758	18	0.925707	0.984439	0.886938	18	0.0835916	0.350734	1.29801	16	0.0001	0.0049995	0.90011	17	0.00469953
462	EED94751.1	1177	21884.9	LVLLGDTAVGK;GAAAAIVVYDITNPDSFAGAK	1;1	2	5	211840;348835;348842;348843;348844	XP_002287308.1	canine-like rab-type small G protein [Thalassiosira pseudonana CCMP1335]	1.19084	5	0.268173	0.580827	1.08986	5	0.155184	0.518817	1.36392	5	0.0886911	0.303674	1.25595	5	0.0214978	0.134045	1.0024	3	0.984902	0.994138	0.836927	5	0.0636936	0.290986	1.17196	5	0.0879912	0.405075	1.04939	4	0.639836	0.906968	1.15387	5	0.0355964	0.256101	1.0946	5	0.452955
463	EED87350.1	25	21708.9	TSHITKPPMPIL;IMIHQPLGGAQGQAADIEIQAK	1;1	2	4	267314;358735;358736;359214	XP_002295284.1;EJK64740.1	predicted protein [Thalassiosira pseudonana CCMP1335]	0.89037	4	0.263374	0.573188	1.10648	4	0.517748	0.800843	1.46008	4	0.0631937	0.243053	1.79922	4	0.0261974	0.154779	0.625703	4	0.187381	0.527541	0.489975	3	0.00109989	0.0164983	0.955405	3	0.69923	0.928148	1.07185	4	0.526747	0.854185	1.5933	4	0.0558944	0.336488	0.825211	4	0.254175
464	EJK55405.1	1393	21528.7	EGSDVTIVTFSK;SIRPLDRDTIIDSVK	1;1	2	6	256867;256886;256892;256901;324972;324974	-	hypothetical protein THAOC_24865, partial [Thalassiosira oceanica]	1.25417	6	0.158584	0.438969	1.16987	6	0.0138986	0.115713	1.15174	6	0.392961	0.706889	1.0854	6	0.194581	0.537235	1.10386	6	0.133187	0.448694	1.11411	6	0.238276	0.610965	1.11449	5	0.142286	0.522682	1.17081	5	0.0780922	0.343682	0.951037	6	0.288271	0.692091	1.08319	6	0.586941
465	EED92233.1	1589	21508.3	VLCQAYPR;FALPNVFWTR	1;1	2	5	98315;173449;173450;173452;173453	XP_002290481.1	thylakoid lumen 15.0-kDa protein, partial [Thalassiosira pseudonana CCMP1335]	1.70208	5	0.0637936	0.247605	1.39085	5	0.110689	0.429337	1.46285	4	0.0234976	0.124836	1.32818	5	0.0372963	0.197091	1.12796	5	0.143086	0.465481	1.26428	5	0.182082	0.531195	1.06688	5	0.522448	0.865197	1.2161	5	0.0855914	0.354171	0.944619	5	0.632537	0.904342	1.12809	5	0.360664
466	EJK77671.1	1071	21420.3	DLYAGTLLSDMSQK;DKENIDKPK	1;1	2	2	302878;321369	EED91843.1;XP_002290091.1;EJK69567.1	hypothetical protein THAOC_00483 [Thalassiosira oceanica]	0.582349	2	0.0615938	0.243799	0.607562	2	0.0150985	0.121462	0.499209	2	0.0511949	0.212938	0.502096	2	0.0122988	0.0935122	0.912786	2	0.715028	0.928461	0.847162	2	0.549845	0.859515	0.817725	2	0.345865	0.741202	0.754949	2	0.292371	0.672637	0.901279	2	0.549345	0.875063	1.05517	2	0.80162
467	XP_002297537.1	320	21310.6	LAPDNYPR;AAEYWYQALK	1;1	2	7	80902;80917;248685;248686;248687;248697;248698	YP_009093444.1;YP_874527.1;ABK20750.1;YP_004072541.1;EED86177.1;AIR76117.1;YP_009093171.1;AIR75844.1;ADB27495.1;AIR75569.1;AIR75428.1;sp|A0T0R5.1|YCF3_THAPS	photosystem I assembly protein ycf3, hypothetical, plastid-encoded [Thalassiosira pseudonana CCMP1335]	0.731697	7	0.00679932	0.0496048	0.88597	7	0.060294	0.3008	0.631097	6	0.00219978	0.0225102	0.870095	7	0.244776	0.604111	0.874967	7	0.241276	0.597545	0.767309	6	0.00559944	0.0522228	0.895097	7	0.19658	0.602802	0.865202	7	0.125687	0.430928	0.941063	6	0.20218	0.60553	0.921071	6	0.156684
468	EJK60504.1	88	21289.5	LDMMETMMK;GKLDMMETMMK	1;1	2	7	222279;222283;222284;222285;222286;312525;314540	EED94655.1;XP_002287212.1;EJK76212.1	hypothetical protein THAOC_19126, partial [Thalassiosira oceanica]	1.57235	7	0.00989901	0.0655809	1.35821	7	0.00259974	0.0374779	2.22346	7	0.00019998	0.00360164	2.13189	6	0.0001	0.00261133	0.422193	7	0.00039996	0.00827044	0.484503	7	0.00019998	0.0040905	0.599202	7	0.0029997	0.039996	0.638644	6	0.00289971	0.0352667	1.35249	7	0.0079992	0.107452	1.07049	7	0.520648
469	CAA04403.1	383	20937.6	GILEHFSS;LAMLAAAGFLAQEAVDGK	1;1	2	13	66448;66453;66454;66455;66466;66467;66470;66473;66487;329557;331097;331102;331103	XP_002295184.1;EED87488.1;XP_002295258.1;EED87562.1;CAA04406.1;CAA04404.1;CAA04402.1;CAA04405.1;CAA04407.1	fucoxanthin chlorophyll a/c binding protein, partial [Cyclotella cryptica]	0.730839	13	0.00369963	0.0337286	0.901564	11	0.00759924	0.0773663	0.573659	12	0.00029997	0.00478094	0.673012	11	0.0001	0.00261133	1.10345	13	0.149585	0.475448	1.2237	10	0.00339966	0.0373133	0.834358	13	0.0469953	0.274648	0.970388	13	0.721428	0.936244	0.777419	11	0.00079992	0.0224978	0.926725	13	0.265573
470	EED92867.1	944	20919.2	AYIEDGFNLYGLR;ACVSNFSDCLDLILDR	1;1	2	2	245143;309397	XP_002289330.1	predicted protein, partial [Thalassiosira pseudonana CCMP1335]	0.762918	2	0.318568	0.637844	0.921058	2	0.668833	0.884231	0.68039	2	0.249775	0.562953	0.835671	2	0.463354	0.792801	1.08348	2	0.747525	0.941957	1.0269	2	0.923208	0.98035	1.00738	2	0.972003	0.993867	0.958276	2	0.876612	0.969879	0.946782	2	0.752225	0.928673	0.867596	2	0.50475
471	EED88228.1	1457	20824.6	ILILGLDNAGK;GALNAQQISDALGLPEVR	1;1	2	7	221755;221758;221759;303745;303757;303758;303760	EJK75650.1;XP_002294394.1	adp-ribosylation factor 1 [Thalassiosira pseudonana CCMP1335]	0.913863	7	0.150585	0.425988	0.986591	7	0.875112	0.953168	0.832486	7	0.152785	0.437465	0.908634	7	0.405359	0.751685	1.32462	6	0.00249975	0.0308017	1.11018	7	0.360864	0.742349	1.17088	7	0.040096	0.244654	1.06334	7	0.749425	0.94176	0.951395	7	0.559444	0.878708	0.950215	5	0.451455
472	AAB70098.1	168	20722.5	AVELNQGR;VSQLAFVGNLITR	1;1	2	8	65855;218624;218625;218626;218627;218628;218629;218631	-	fucoxanthin-chlorophyll a/c light-harvesting protein, partial [Skeletonema costatum]	0.560026	7	0.0001	0.00219734	0.731538	8	0.00429957	0.0541806	0.229771	7	0.0001	0.00211861	0.353521	8	0.0001	0.00261133	1.79443	7	0.00029997	0.00719528	1.90861	7	0.00379962	0.0402313	0.804911	7	0.00129987	0.021079	0.820352	8	0.060094	0.280959	0.503478	7	0.00019998	0.0079992	0.752131	7	0.00029997
473	EED90805.1	1377	20651.5	ATIGADFLSK;NVTLQIWDTAGQER	1;1	2	2	195849;265580	XP_002291954.1;EJK70436.1	predicted protein, partial [Thalassiosira pseudonana CCMP1335]	1.39613	2	0.221978	0.516801	1.21065	2	0.320868	0.681155	1.92805	2	0.0610939	0.239068	1.6867	2	0.0444956	0.220168	0.890475	2	0.759424	0.942616	0.926224	2	0.883012	0.974912	1.2627	2	0.30237	0.714031	1.34476	2	0.436656	0.807621	1.37467	2	0.0724928	0.387856	1.1362	2	0.547745
474	ADB27506.1	707	20536.1	ISEGLNPQR;EILLTYPLNNIQSIGIK	1;1	2	3	100308;341591;341592	EJK52347.1;EJK55851.1;YP_004072552.1	photosystem I assembly protein Ycf4 (chloroplast) [Thalassiosira oceanica CCMP1005]	0.682638	3	0.0287971	0.143349	0.867594	3	0.180282	0.547523	0.619657	3	0.060094	0.236308	0.78984	3	0.269273	0.632977	1.11723	3	0.521748	0.8387	1.2573	3	0.434157	0.796618	1.05249	3	0.670533	0.91784	1.20318	3	0.462954	0.822123	0.951458	3	0.670133	0.911936	0.840209	3	0.158384
475	EED89112.1	543	18765.7	GAVYALGDK;CPPVNQPLSFGK	1;1	2	5	156825;156826;268997;269008;269009	XP_002293376.1;EJK64528.1	predicted protein [Thalassiosira pseudonana CCMP1335]	0.909263	5	0.345665	0.66477	1.01993	5	0.728527	0.902269	1.15241	5	0.29997	0.622403	1.29471	5	0.00809919	0.0666427	0.715459	5	0.00789921	0.0700033	1.26132	4	0.0691931	0.305264	0.946339	5	0.436056	0.807512	1.78766	3	0.0039996	0.043898	1.2945	5	0.00159984	0.0342823	0.914809	5	0.306469
476	EJK44963.1	1649	18162.2	MMMEQMK;EMMGGLVEVVK	1;1	2	5	167550;237156;237157;237161;237167	-	hypothetical protein THAOC_36458 [Thalassiosira oceanica]	1.494	5	0.0539946	0.224707	1.35191	4	0.0177982	0.1359	1.86569	5	0.00619938	0.0479188	1.5198	5	0.0223978	0.138697	0.639825	4	0.00169983	0.0248617	0.562119	4	0.00069993	0.0117745	0.877902	5	0.10079	0.440344	0.783481	5	0.0189981	0.130521	1.23717	5	0.00589941	0.0892348	1.20151	5	0.0392961
477	EJK77692.1	610	18150.3	ASNIVEDLGTLR;VEGLLAAFPK	1;1	2	6	185240;185259;185260;185268;201438;201439	EED94881.1;XP_002287438.1	hypothetical protein THAOC_00461, partial [Thalassiosira oceanica]	0.893208	5	0.161484	0.443588	0.981728	6	0.874013	0.953168	0.848906	6	0.0629937	0.243053	0.86526	6	0.258074	0.618417	1.27934	6	0.00449955	0.0462554	1.22023	6	0.0792921	0.329276	1.14721	4	0.148685	0.524771	1.10313	6	0.156284	0.48502	0.906139	6	0.249075	0.646948	1.06489	5	0.356464
478	EJK52343.1	234	17999.4	AVSLGYW;KPDLTDPK	1;1	2	3	45422;243155;243158	YP_009093193.1;YP_874549.1;ABK20772.1;ADB27512.1;XP_002297529.1;AIR75450.1;AIR75591.1;YP_009093466.1;EJK54219.1;YP_004072558.1;AIR76139.1;sp|A0T0T7.1|PETD_THAPS;EED86169.1;EJK55855.1;AIR75866.1	hypothetical protein THAOC_28390 [Thalassiosira oceanica]	0.472469	3	0.00109989	0.013302	0.516499	3	0.0111989	0.101921	0.389022	3	0.00049995	0.00714611	0.424078	3	0.0009999	0.0146489	1.24165	3	0.240976	0.597545	0.796454	3	0.158484	0.501806	1.07491	3	0.59624	0.897502	0.694711	3	0.0365963	0.203942	0.862958	3	0.148585	0.52483	0.955557	3	0.845115
479	EED89475.1	1329	17723.8	LVLEFTEDYPNK;LVLEFTEDYPNKAPSVR	1;1	2	6	290811;344755;344756;344757;344759;344760	XP_002293014.1	ubiquitin-conjugating enzyme 1 [Thalassiosira pseudonana CCMP1335]	1.06313	4	0.533047	0.811428	0.959802	6	0.692631	0.891515	1.12137	4	0.361164	0.684837	0.974349	6	0.79872	0.936548	0.843177	6	0.261174	0.618226	0.699196	6	0.00759924	0.0664011	0.888642	6	0.153485	0.533344	0.742053	6	0.00259974	0.0334252	1.03847	6	0.59844	0.892454	1.16272	6	0.210679
480	ADB27544.1	1061	17353.3	EAQLEIANSQNIHK;KEYILSHLAEASEK	1;1	2	7	309577;309585;309592;309593;309594;341100;341101	YP_004072590.1	ATP synthase CF0 subunit II B' chain (chloroplast) [Thalassiosira oceanica CCMP1005]	0.669351	7	0.0120988	0.0764983	0.726479	7	0.0167983	0.132186	0.590517	7	0.00229977	0.023269	0.628907	7	0.00579942	0.0519928	1.08576	7	0.323468	0.700638	1.0627	7	0.374163	0.753675	0.995474	7	0.955104	0.991249	0.986136	7	0.90231	0.975726	0.847249	6	0.0319968	0.245848	1.00038	5	0.9961
481	EJK66153.1	820	17024.5	ENIAFDNALEFFVCGDQLLR;AHSESIVALFDKPVDVAAAR	1;1	2	2	349604;351045	EJK47642.1	hypothetical protein THAOC_12945, partial [Thalassiosira oceanica]	0.790337	2	0.384962	0.70355	1.17863	2	0.669633	0.884231	0.845941	2	0.732227	0.905344	1.33454	2	0.237976	0.599684	0.823865	2	0.436556	0.781458	0.932991	2	0.80262	0.949629	0.919542	2	0.688631	0.92522	1.04432	2	0.874513	0.969879	1.11973	2	0.729827	0.926988	0.681578	2	0.330467
482	EED91852.1	324	15876.6	ANPMGGSTMAK;VAGVSLLALYK	1;1	2	3	206338;210384;223502	EJK47606.1;XP_002290100.1	RS23, ribosomal protein 23 40S small ribosomal subunit [Thalassiosira pseudonana CCMP1335]	0.382774	3	0.0339966	0.164241	0.5148	3	0.00049995	0.0123412	0.34832	3	0.29577	0.617961	0.406604	3	0.192981	0.537235	0.874254	3	0.684532	0.915848	0.925431	3	0.765823	0.943972	0.771829	3	0.347365	0.741202	0.773571	3	0.49935	0.838967	0.941555	3	0.882612	0.972078	0.860303	3	0.478252
483	EED95038.1	1568	15810.9	EVPGAYELPYAAK;GETLHFEYISEAVSK	1;1	2	15	281023;281025;281027;281029;281031;281037;281038;281039;322965;322967;322968;322973;322974;346902;346906	XP_002287595.1	predicted protein, partial [Thalassiosira pseudonana CCMP1335]	1.85049	14	0.0001	0.00219734	1.31037	15	0.0001	0.00353298	2.16377	15	0.0001	0.00211861	1.67571	13	0.0001	0.00261133	1.04706	15	0.351065	0.721169	0.980685	15	0.69903	0.917764	1.31163	15	0.0001	0.0036731	1.2507	15	0.0001	0.00260844	1.19717	14	0.0001	0.0049995	1.38272	14	0.0001
484	XP_002291179.1	545	15748.2	FGIATATGR;YPFLLVDK	1;1	2	2	67646;188549	EED91286.1;EJK74799.1	predicted protein, partial [Thalassiosira pseudonana CCMP1335]	4.53864	2	0.0001	0.00219734	1.30395	2	0.169183	0.535796	1.45722	2	0.249675	0.562953	0.422547	2	0.00439956	0.0440445	2.41786	2	0.00179982	0.0252959	2.25654	2	0.0089991	0.0749925	0.819938	2	0.354265	0.748624	0.771361	2	0.330067	0.718405	0.338204	2	0.0001	0.0049995	3.47151	2	0.00089991
485	EED91184.1	558	15339.3	QMIVDIIHPGR;SELQEVVGGMHK	1;1	2	11	182498;182499;187336;187337;187338;187339;187346;263106;263120;266258;266271	XP_002291077.1	RS24, ribosomal protein 24 40S small ribosomal subunit [Thalassiosira pseudonana CCMP1335]	0.650123	11	0.00029997	0.00505183	0.711426	10	0.0001	0.00353298	0.621021	11	0.00139986	0.0154672	0.676799	10	0.0001	0.00261133	0.813292	10	0.0184982	0.129993	0.730215	10	0.0001	0.00239976	0.867148	11	0.0483952	0.280101	0.797167	11	0.00329967	0.0373548	1.03013	10	0.491651	0.846397	0.993586	11	0.934407
486	EJK57197.1	1497	15060.8	FLIDGFPR;VVFVLGGPGAGK	1;1	2	3	86412;86418;215457	EED94991.1;XP_002287548.1	hypothetical protein THAOC_22787, partial [Thalassiosira oceanica]	0.6104	3	0.009999	0.0660007	0.96541	3	0.725227	0.902269	0.474801	3	0.00369963	0.0330585	0.763738	3	0.0627937	0.273981	1.01709	3	0.949805	0.990535	0.91535	3	0.753825	0.940003	0.83521	3	0.314769	0.724531	0.749426	3	0.19558	0.557033	0.82926	3	0.0787921	0.403812	0.667487	3	0.00709929
487	AIR75846.1	663	14455.7	LEGINYLS;WTPIILCGGLAEIDR	1;1	2	9	71253;71254;71262;71263;71264;71270;281387;281388;281389	sp|A0T0R7.1|ATPE_THAPS;YP_009093173.1;AIR75571.1;AIR75430.1;YP_009093446.1;AIR76119.1;ABK20752.1;YP_874529.1	ATP synthase CF1 epsilon subunit (chloroplast) [Roundia cardiophora]	0.747674	9	0.0281972	0.141536	0.684997	9	0.0140986	0.116008	0.38643	9	0.00029997	0.00478094	0.361464	9	0.00039996	0.00750758	1.36645	9	0.0561944	0.269583	2.31858	5	0.0001	0.00239976	0.818142	8	0.108489	0.458405	1.28747	9	0.0594941	0.279347	0.573926	9	0.00179982	0.0372377	1.12951	9	0.0343966
488	YP_009093249.1	738	13802.4	AALEALSTGIK;KGTPFAAQTAAEK	1;1	2	7	208823;208830;208832;208834;313155;313159;313162	AIR75506.1;AIR75647.1;AIR75922.1	ribosomal protein S11 (chloroplast) [Roundia cardiophora]	0.532123	7	0.00049995	0.00763483	0.719002	7	0.0169983	0.133178	0.423816	7	0.00379962	0.0330585	0.572219	7	0.0182982	0.121225	0.664953	6	0.00029997	0.00719528	0.736783	7	0.00229977	0.0279702	0.602035	5	0.0001	0.0036731	0.627635	5	0.00029997	0.00642793	0.929683	6	0.205679	0.611939	0.797527	5	0.010099
489	XP_002288348.1	223	13747.8	AQSLTLQR;DGKPIFLGSSK	1;1	2	3	73323;73327;288554	EED93784.1;EJK61686.1	RL24, ribosomal protein 24 60S large ribosomal subunit, partial [Thalassiosira pseudonana CCMP1335]	0.517778	3	0.0136986	0.0851205	0.56364	3	0.00269973	0.0377125	0.434967	3	0.126387	0.386458	0.469372	3	0.0838916	0.32233	1.25746	3	0.529847	0.843246	0.989668	3	0.959604	0.989077	1.10541	3	0.737526	0.934892	0.880485	3	0.417758	0.793212	0.880025	3	0.630137	0.90177	0.967623	3	0.819518
490	EED93172.1	342	13743.4	LNVSGPVR;LIDLHAPSDVVK	1;1	2	7	55221;261862;261872;261876;261879;261880;261881	XP_002289635.1	RS20, ribosomal protein 20 40S small ribosomal subunit, partial [Thalassiosira pseudonana CCMP1335]	1.10818	6	0.123888	0.377076	0.848381	6	0.0257974	0.172814	1.05703	7	0.70173	0.895383	0.723569	6	0.00159984	0.0201602	0.592067	6	0.0001	0.0035271	0.756645	6	0.00419958	0.0429503	0.670747	7	0.00249975	0.0365817	0.852687	7	0.177082	0.521683	1.03814	7	0.720728	0.926988	1.34866	7	0.0262974
491	EJK47511.1	1533	13644.5	GVAFQQSIVR;EMYVSGATLFEGVK	1;1	2	2	127327;301194	EJK76757.1	hypothetical protein THAOC_33758, partial [Thalassiosira oceanica]	1.82374	2	0.0464953	0.203856	2.09613	2	0.00289971	0.0398876	1.71651	2	0.114389	0.36334	2.05965	2	0.010199	0.0795609	1.36991	2	0.243276	0.599525	1.23273	2	0.454355	0.811076	1.33917	2	0.178282	0.568986	1.22475	2	0.451355	0.816521	0.965656	2	0.841816	0.964516	0.847311	2	0.440356
492	ABK20818.1	781	13463.3	IVSLAPEVL;MIYPQTMLTVADNTGAK	1;1	2	8	79755;79756;79757;79758;79759;79766;79767;336227	YP_004072632.1;YP_009093512.1;AIR76185.1;AIR75496.1;AIR75637.1;ADB27585.1;sp|A0T0Y3.1|RK14_THAPS;YP_874595.1	50S ribosomal protein L14 (chloroplast) [Thalassiosira pseudonana]	0.830089	8	0.0821918	0.290411	0.959588	8	0.716128	0.901162	0.777311	8	0.133987	0.400182	0.90593	8	0.468353	0.79503	0.602858	8	0.009999	0.0813946	0.925641	7	0.19608	0.553205	0.589881	8	0.00949905	0.0955212	0.803994	8	0.139586	0.455172	0.968753	8	0.672033	0.911936	0.892426	8	0.278772
493	EJK66158.1	520	13356.7	ASQIVAEAR;AVDVLLSK	1;1	2	3	80666;141271;141272	-	hypothetical protein THAOC_12933 [Thalassiosira oceanica]	2.52266	3	0.0119988	0.0764023	2.30996	3	0.00019998	0.00621317	2.39629	3	0.0210979	0.116556	2.25616	3	0.00079992	0.0127562	1.49463	3	0.0746925	0.323009	1.26674	3	0.173883	0.524179	1.48058	3	0.0246975	0.177822	1.275	3	0.122588	0.42294	0.979464	3	0.828017	0.958476	1.07062	3	0.621738
494	sp|A0T0X8.1|RK22_THAPS	631	13017.1	QVLDQIR;LVISEIFADEGPK	1;1	2	4	62195;282822;282823;282827	ABK20813.1;YP_874590.1	RecName: Full=50S ribosomal protein L22, chloroplastic	0.648562	4	0.00359964	0.0334358	0.862734	4	0.191381	0.564433	0.583598	4	0.00879912	0.0616435	0.780955	4	0.269773	0.632977	1.10833	4	0.427757	0.77864	1.10804	4	0.631637	0.896678	1.04148	4	0.736526	0.934892	1.05396	4	0.733627	0.937781	0.943099	4	0.594741	0.890626	0.792378	4	0.0328967
495	sp|A0T101.1|RR10_THAPS	538	12610.6	SDLPPGVLYR;LESFNHELLNTSCQK	1;1	2	9	20071;131167;131175;131176;131177;131178;131181;333441;333442	YP_874613.1;ABK20836.1;AIR75655.1;AIR75514.1	RecName: Full=30S ribosomal protein S10, chloroplastic	0.691222	9	0.0112989	0.0732394	0.92671	9	0.449355	0.753747	0.539994	9	0.00119988	0.0139418	0.737524	9	0.0389961	0.201349	0.765012	9	0.0579942	0.277219	0.782688	9	0.0260974	0.155034	0.637933	7	0.0001	0.0036731	0.64604	9	0.00029997	0.00642793	0.828875	9	0.00529947	0.0829482	0.769906	9	0.00249975
496	YP_009093212.1	62	12428.9	YAIVEISGR;QFWIETGK	1;1	2	3	98682;192117;192118	AIR76216.1;AIR75943.1;YP_009093270.1;ABK20791.1;YP_009093485.1;sp|A0T0V6.1|RK21_THAPS;AIR75885.1;YP_874626.1;ABK20849.1;AIR76158.1;YP_009093543.1;YP_874568.1	ribosomal protein L21 (chloroplast) [Roundia cardiophora]	0.623133	3	0.0374963	0.175061	0.723186	3	0.0144986	0.117686	0.418249	3	0.0136986	0.0862631	0.488574	3	0.00069993	0.0114661	0.922215	3	0.532847	0.843246	0.930793	3	0.615738	0.892375	0.659092	3	0.0739926	0.369963	0.660961	3	0.0319968	0.189981	0.726791	3	0.00779922	0.106353	0.901502	3	0.514049
497	XP_002297038.1	252	11977.2	YALAPLMQAEADR;YALAPLMQAEADREYMER	1;1	2	3	225936;229698;336124	EED86766.1	predicted protein, partial [Thalassiosira pseudonana CCMP1335]	0.880835	3	0.354465	0.67379	0.893007	3	0.315768	0.680042	0.566108	3	0.0541946	0.223351	0.585809	3	0.0382962	0.200492	1.53235	3	0.138186	0.456801	1.56168	3	0.0761924	0.320856	1.04618	3	0.70203	0.928148	1.07468	3	0.709329	0.936167	0.709753	3	0.233677	0.632508	1.01776	3	0.879212
498	EJK73546.1	1402	11593	SHLPSFIDAQDELK;VAIFAVPGAFTPGCSK	1;1	2	5	46407;312933;312934;312935;312936	EJK50639.1	hypothetical protein THAOC_04822 [Thalassiosira oceanica]	1.14565	4	0.19618	0.483607	1.05241	5	0.658434	0.882155	1.09543	4	0.476552	0.768167	1.2511	4	0.0445955	0.220168	0.60714	5	0.0167983	0.120399	0.741391	5	0.165083	0.512328	0.702823	4	0.00309969	0.0410253	0.88771	4	0.345465	0.730714	1.08305	4	0.534347	0.86667	0.957451	5	0.756624
499	EJK50021.1	593	11458.1	DVSGVLHAPTLK;TAGGILLPTDSAK	1;1	2	2	247429;248947	-	hypothetical protein THAOC_31049 [Thalassiosira oceanica]	1.76554	2	0.0506949	0.216894	1.05773	2	0.768523	0.913546	1.94351	2	0.0592941	0.235217	1.16569	2	0.531347	0.837177	0.51943	2	0.0223978	0.148138	0.365394	2	0.00259974	0.0301905	0.590967	2	0.0212979	0.16383	0.416556	2	0.00459954	0.0495759	1.11563	2	0.528447	0.86667	1.61851	2	0.0340966
500	XP_002291480.1	1023	11060	NIVDASSLR;MYYCVEAAVHQR	1;1	2	2	89114;247759	EED91587.1;EJK48154.1	RS26, ribosomal protein 26 40S small ribosomal subunit, partial [Thalassiosira pseudonana CCMP1335]	0.558323	2	0.0462954	0.203474	0.770523	2	0.177482	0.544223	0.546977	2	0.110489	0.35534	0.7495	2	0.350965	0.70193	1.37707	2	0.20158	0.546148	0.982191	2	0.949005	0.987099	1.3947	2	0.130287	0.510728	1.01404	2	0.957904	0.992593	1.00194	2	0.993001	0.998292	0.77015	2	0.223378
501	YP_009093505.1	162	10420.7	LGEFVSTR;DIITTWSR	1;1	2	2	71298;94052	AIR75905.1;AIR76178.1;YP_009093232.1	ribosomal protein S19 (chloroplast) [Thalassiosira weissflogii]	0.369123	2	0.00519948	0.0414578	0.641851	2	0.0276972	0.182822	0.257037	2	0.00129987	0.0146317	0.450846	2	0.00679932	0.0591902	0.571883	2	0.0338966	0.19671	0.774584	2	0.360264	0.742168	0.429315	2	0.00159984	0.0248251	0.571225	2	0.0483952	0.245384	0.766787	2	0.125787	0.487532	0.616623	2	0.0335966
502	EED96001.1	929	10169.5	AIGSPIWILMR;ILPLELIDK	1;1	2	5	180737;180739;203800;203801;203802	XP_002286360.1;EJK48624.1;EJK62729.1	predicted protein [Thalassiosira pseudonana CCMP1335]	0.959905	4	0.674833	0.879559	0.891705	5	0.0758924	0.344933	0.865391	5	0.158784	0.446828	0.763222	5	0.00659934	0.0582942	1.17165	5	0.227777	0.576785	0.973576	3	0.848315	0.967047	1.04105	5	0.712929	0.930448	0.855	5	0.079692	0.347447	0.854529	4	0.0546945	0.334864	1.16349	3	0.210879
503	EJK74654.1	680	9800.18	FIALPDLLR;GLLLNAEDTMNMTLSEVVR	1;1	2	3	113277;113278;333288	EJK72932.1;XP_002293306.1;EED89042.1	hypothetical protein THAOC_03654 [Thalassiosira oceanica]	0.712135	3	0.263774	0.573366	0.799409	3	0.383262	0.70762	0.429262	3	0.131087	0.397088	0.498113	3	0.164484	0.48411	1.07634	3	0.568343	0.856624	1.02883	3	0.871213	0.971791	0.70263	3	0.228977	0.647031	0.657116	3	0.312069	0.699532	0.686978	3	0.0579942	0.345661	0.924145	3	0.49945
504	XP_002295845.1	1239	9501.24	GTEIVFIVLPEMLR;VGIPIVLLHDAEGAVVTVETK	1;1	2	2	266102;353941	ACI64562.1	predicted protein, partial [Thalassiosira pseudonana CCMP1335]	0.855326	2	0.559744	0.826509	0.839975	2	0.365763	0.698205	0.739002	2	0.416458	0.721888	0.722296	2	0.185681	0.523627	0.907488	2	0.69643	0.919881	0.879623	2	0.645335	0.901167	0.818581	2	0.537646	0.871074	0.793508	2	0.59974	0.890133	0.910876	2	0.659534	0.911202	1.05855	2	0.792121
505	AIR75596.1	3	9489.82	QQVPLVNDR;SGGSTGERPFSDIITSVR	1;1	2	9	116521;116523;116524;116529;116530;116532;305571;305572;305573	ABK20777.1;YP_009093198.1;AIR76144.1;EJK52346.1;ADB27507.1;XP_002297507.1;sp|A0T0U2.1|PSBE_THAPS;EJK55852.1;EED86147.1;AIR75455.1;YP_004072553.1;AIR75871.1;YP_874554.1;YP_009093471.1	photosystem II cytochrome b559 alpha subunit (chloroplast) [Cyclotella sp. WC03_2]	0.526632	9	0.00019998	0.00367718	0.68814	8	0.0001	0.00353298	0.321903	9	0.0001	0.00211861	0.442714	9	0.0001	0.00261133	1.34529	9	0.0670933	0.3048	1.64051	8	0.0001	0.00239976	0.874802	9	0.266673	0.684803	1.03436	9	0.642436	0.906968	0.661277	9	0.00139986	0.0323045	0.769648	9	0.00219978
506	AIR76168.1	1018	9398.07	DGRPVDEVGYYNPITK;RDGRPVDEVGYYNPITK	1;1	2	4	333716;333720;333724;344837	YP_009093495.1;YP_009093222.1;AIR75895.1	ribosomal protein S16 (chloroplast) [Thalassiosira weissflogii]	0.969039	3	0.811619	0.945781	0.879188	4	0.413259	0.726529	0.55655	4	0.0291971	0.143672	0.693669	3	0.019998	0.128428	1.10546	4	0.520148	0.8387	1.0853	4	0.785121	0.944034	0.92058	3	0.485951	0.850236	0.829729	4	0.40396	0.780179	0.775549	4	0.19588	0.593577	0.909113	4	0.559544
507	EED93645.1	1021	9389.71	GFAFVSFVHR;LQGHGYDHLILK	1;1	2	4	146832;146836;146837;278590	XP_002288209.1;EJK47313.1	predicted protein, partial [Thalassiosira pseudonana CCMP1335]	0.970686	3	0.823218	0.949704	0.890493	4	0.678032	0.885656	0.92946	3	0.666133	0.881489	1.34927	4	0.306969	0.670181	0.816896	4	0.461654	0.800415	0.570996	4	0.20378	0.565182	1.27891	4	0.634437	0.905881	0.924235	4	0.859214	0.969879	0.993607	3	0.947605	0.985468	1.0384	4	0.875712
508	XP_002286655.1	1233	8953.68	QAFNFEPENQVLAVK;KQAFNFEPENQVLAVK	1;1	2	4	325560;325562;325563;354269	EED96296.1	predicted protein, partial [Thalassiosira pseudonana CCMP1335]	1.0964	3	0.49525	0.784219	1.09838	4	0.217878	0.592182	0.948592	4	0.739326	0.908874	0.984141	3	0.90041	0.970516	1.0063	4	0.949605	0.990535	0.864698	4	0.19988	0.559509	0.861087	4	0.121188	0.484752	0.778079	3	0.113789	0.411284	0.85915	4	0.0892911	0.414097	1.06393	4	0.610039
509	XP_002290050.1	819	8601.27	YGDCFIR;SPSDFLK	1;1	2	3	76779;125066;125068	EED91802.1;EJK73758.1	hypothetical protein THAPSDRAFT_262381, partial [Thalassiosira pseudonana CCMP1335]	0.894135	3	0.411559	0.721429	0.788263	3	0.117988	0.445733	0.836691	3	0.441856	0.740952	0.738154	3	0.288371	0.656117	1.08874	3	0.688531	0.916029	0.806009	3	0.176082	0.524179	1.06757	3	0.578842	0.889987	0.799119	3	0.147485	0.473215	0.966218	3	0.829617	0.958826	1.16169	3	0.214979
510	EED89642.1	474	47362.9	GTVVTGR;EHILLAK;LVVFLNK;TVGTGIVTK;TTLTQAITK;TTCTGVEMFK;LLDYGMAGDNVGALLR;DKPHVNIGTIGHVDHGK;NMITGAAQMDGGILVVAATDGPMPQTR	1;0;1;1;1;1;1;1;1	8	19	26359;134745;134746;137577;137580;137587;151209;183148;183149;232894;236522;274643;274648;274654;352495;361881;361882;361885;361887;362202;362204	XP_002293181.1	translation factor elongation factor ef-tu [Thalassiosira pseudonana CCMP1335]	1.1896	19	0.0745925	0.274879	1.31164	19	0.00149985	0.0264973	1.10337	18	0.340366	0.668483	1.24603	18	0.00729927	0.0626347	1.1548	19	0.0665933	0.3048	1.1002	19	0.288571	0.669199	1.05803	17	0.277172	0.69768	1.04714	18	0.561344	0.8771	0.994995	17	0.90221	0.975948	0.801918	17	0.00079992
511	EED92063.1	110	47380.3	QAGWGVMTSHR;VNQIGSISESIDAVK;AGAAANNLPLYAHYAK;EGCELIMEALKK;FVASVPSGASTGAYEACELR;VKGEDKYDLDFK;SGETEDTYIADLAVGLCTGQIK	1;0;1;1;1;1;1	6	12	166601;166607;305391;305392;305393;305394;305395;305404;305405;315606;315608;315609;315610;324645;328766;328767;349913;349521;360237	XP_002290311.1	enolase [Thalassiosira pseudonana CCMP1335]	1.20228	12	0.0412959	0.187444	0.875569	12	0.151485	0.51215	1.35139	11	0.00069993	0.0090041	1.12684	11	0.10279	0.366039	0.670744	12	0.00129987	0.0201592	0.70631	12	0.0105989	0.0825891	0.854493	12	0.0237976	0.174129	0.908396	12	0.361264	0.741354	1.24423	12	0.00939906	0.120845	1.37842	12	0.00839916
512	XP_002287665.1	288	110824	QFGLADGK;NGGGPIEHLK;GGILVGDASDYSK;SAAVIGGGLLGLEAAK	1;0;1;1;1;0;1;1;1;1;0;1;1;1;1;1	13	17	138418;195450;256598;256606;284379;284381;284383;284384	EED95108.1	NADPH nitrite reductase [Thalassiosira pseudonana CCMP1335]	0.929525	7	0.471153	0.768342	1.08359	7	0.273773	0.648276	0.847777	7	0.222778	0.52862	1.03495	5	0.644936	0.889537	0.817556	6	0.0720928	0.314794	0.597959	5	0.00449955	0.0452469	0.683659	7	0.0516948	0.29156	0.5698	7	0.0358964	0.20297	0.956215	7	0.474753	0.830471	0.874129	7	0.179282
513	EJK45149.1	698	57765.6	AQASAVFHVAK;VAQGVSGAVQDK;YGVPILADGGIK;QLLVGAAIGTRPEDR;LPVVNDNDELVALIAR	1;0;1;1;1	4	6	222190;229276;229278;239785;239786;258686;287647;287649	-	hypothetical protein THAOC_36256 [Thalassiosira oceanica]	1.51826	5	0.00139986	0.0163802	1.41774	6	0.0216978	0.154644	1.43455	6	0.0276972	0.139337	1.47994	4	0.00409959	0.0419742	1.27853	6	0.0833917	0.342515	1.16789	6	0.373663	0.753675	1.44369	5	0.00059994	0.0130107	1.37203	5	0.00579942	0.0586458	1.04897	6	0.60314	0.893901	0.964961	6	0.79932
514	XP_002288699.1	195	105683	FCDAMLSIR;LCGSDLCVPK;STEVAILNANYMAAR;LAPPSSWGADIAVGSAQR;SAHGTNPASAAMAGMK;GMTAAQVQEGAASVGANVR;SYIGMGYYDTIVPNVILR;DLALNHSMISLGSCTMK;FFVSKDVHPQTISLIQTR	1;0;1;1;0;1;0;0;1	5	13	129829;129830;134786;226985;226993;264257;264258;267391;292602;296429;296430;296433;298211;298213;298214;300795;300799;329030;330477;330480;337936;351993	EED94135.1	glycine decarboxylase p-protein [Thalassiosira pseudonana CCMP1335]	1.03763	13	0.594541	0.84559	1.13751	13	0.0171983	0.134161	0.847383	13	0.0691931	0.255945	0.903296	12	0.0980902	0.353517	0.962969	13	0.69783	0.919953	1.02433	13	0.79592	0.947524	0.823336	13	0.0747925	0.370872	0.890274	11	0.161384	0.492358	0.829888	12	0.00029997	0.0105872	0.922963	13	0.262474
515	EJK60932.1	527	70640.6	GPFTYDAR;TTLLPGLLK;FVPLTHTDEGR;YDLLCIEGISR;YQSFIELQDQLHR;NVFIECTATDLTK	1;0;1;1;0;0	3	7	75716;75720;176507;176508;176509;180247;180249;180269;198768;198769;274386;274391;274392;274393;298090;298093;298096;298097;298100	-	hypothetical protein THAOC_18650 [Thalassiosira oceanica]	1.20874	19	0.00859914	0.0580361	1.07791	18	0.138186	0.482693	1.13023	19	0.113389	0.361439	0.990856	19	0.845215	0.950588	0.879045	16	0.00069993	0.012225	0.811979	19	0.00159984	0.021652	0.878395	19	0.0524948	0.29254	0.793667	19	0.00259974	0.0334252	0.966233	17	0.316468	0.714734	1.14978	19	0.0224978
516	XP_002290445.1	552	51884.5	ISPLGLAR;CGAGTNNVPVAR;GEGGTHGIIGK;ELVLCGLFLGSR;MTELGIPVFNTPGANANAVK	1;0;1;1;0	3	6	51821;162346;196536;205127;205129;205130;205134;348505	EED92197.1	D-3-phosphoglycerate dehydrogenase [Thalassiosira pseudonana CCMP1335]	1.61894	6	0.0049995	0.0407652	1.18023	6	0.132387	0.473112	1.07926	4	0.570143	0.833464	0.940573	5	0.70343	0.903334	1.15075	6	0.167883	0.501698	0.893376	5	0.19878	0.558197	0.763159	6	0.180682	0.572584	0.628742	6	0.019698	0.133798	0.711413	6	0.0478952	0.31236	1.24436	4	0.0328967
517	XP_002296787.1	551	50150.7	ITMLDGVLSSR;CGAGTNNVPVAR;ELVIAGMLLGSR;TLAVIGLGHIGAATAR;MTELGIPVFNTPGANANAVK	1;0;1;1;0	3	19	154717;154719;154730;154732;154733;154738;154744;162346;181243;181244;181250;181252;181254;181255;181256;242897;242898;242901;242905;242917;348505	EED86988.1	predicted protein [Thalassiosira pseudonana CCMP1335]	0.844976	19	0.0459954	0.203474	1.03207	19	0.468853	0.76764	0.746908	18	0.0001	0.00211861	0.977918	19	0.762624	0.921695	1.14101	19	0.0459954	0.235584	1.11105	19	0.115188	0.41551	1.0833	19	0.20478	0.614339	1.10994	18	0.107589	0.39677	0.924	16	0.00669933	0.0964704	0.846253	19	0.00239976
518	XP_002290700.1	542	118296	LPANERGTSFFGRNAALAFKDSHPLTYKGNGENLPGFMIGRFEYDEVYVGTPEERAMKFEYDEVYVGTPEER	1;0;1;1	3	30	276807;276812;276813;276814;276815;276816;276817;276818;276819;276820;276821;276822;276823;276824;276825;276826;276827;276828;276829;276830;276831;276832;276833;293512;293513;293514;293515;293516;293522;293523;293524;293525;293526;293527;330750;330751;330752;330753;330754;330755;330756;330757;330759	XP_002290700.1	silicon transporter [Thalassiosira pseudonana]	0.03151	3	0.610419	100	0.448324	1	0.313623	0.859339	0.239631	1	0.00251175	0.813316	0.813302	1	0.629915	0.888154	1.19005	1	0.118758	0.994134	1.31626	1	0.551322	0.977174	0.933651	1	0.183318	0.922346	0.118052	1	0.136821	0.1338	0.883115	1	0.426118	0.733318	0.122131	1	0.441116
519	EED87971.1	978	100429	GGEIIEPLVSK;SLGASADWTR;FTMDPALSVGVSEAFVR;YSLVTGVTPGQDIPLNMDK	1;0;1;1	3	4	11416;225410;114863;114864;114874;114877;299698;348697	XP_002294611.1	valine--tRNA ligase-like protein [Thalassiosira pseudonana CCMP1335]	1.40302	4	0.0171983	0.0999719	1.04825	4	0.738726	0.90742	1.41245	3	0.0782922	0.27902	0.971731	4	0.849915	0.950588	1.10518	4	0.337166	0.707774	1.33238	4	0.112889	0.413849	1.05951	4	0.519848	0.865197	1.29752	4	0.039696	0.214573	0.911674	3	0.331267	0.727373	1.3201	4	0.0118988
520	EJK72358.1	930	43091.7	TPMVATLK;ACYDLDVHGK;FTPSVIEPSFGMGR;FKPAVAPQK	1;0;1;1	3	6	146412;233794;243698;243700;243712;243713;258325	-	hypothetical protein THAOC_06118 [Thalassiosira oceanica]	0.919646	5	0.282572	0.600394	1.16034	5	0.0313969	0.200628	0.833921	6	0.155484	0.440295	0.994257	6	0.957104	0.987138	1.13614	5	0.208579	0.557475	0.912041	5	0.556044	0.864318	1.16993	6	0.186181	0.581817	0.875908	5	0.245575	0.625148	0.904916	6	0.285471	0.690657	0.866858	4	0.121888
521	XP_002291793.1	915	41232	VTVVDWK;LYAEEMALAYGR;KLEVAVK;SFTYIDDCVEGVLR	1;0;1;1	3	12	141842;210915;210916;214779;214788;213064;213065;273816;273817;273818;273819;273820;273821;273822;273828;273830	EED90644.1	dual function enzyme: UDP-glucose 4-epimerase [Thalassiosira pseudonana CCMP1335]	1.13522	12	0.159584	0.43971	1.04836	12	0.412059	0.725836	1.26993	12	0.111989	0.35761	1.1815	12	0.0765923	0.308768	0.754607	12	0.0029997	0.035503	0.854876	11	0.059694	0.281281	0.897226	11	0.0221978	0.167882	0.982513	10	0.652435	0.915597	1.13855	12	0.0647935	0.365588	1.0236	11	0.760324
522	XP_002292510.1	77	40962.6	GCDLLVATPGR;MLDMGFEPQIR;TYPECLVLAPTR;DLMACAQTGSGK	1;0;1;1	3	9	144329;144330;198164;198167;198168;202223;202224;202225;202227;202229;202241;206287;219085;219089;219091;219092;219094;251193;251197	EED90485.1	predicted protein [Thalassiosira pseudonana CCMP1335]	0.695126	9	0.00069993	0.0095551	0.853612	9	0.00449955	0.0551577	0.613679	9	0.00019998	0.00360164	0.774091	8	0.00029997	0.00607355	1.08495	9	0.193481	0.535495	0.982955	9	0.755024	0.940003	1.00073	9	0.989901	0.996081	0.911506	9	0.151685	0.480162	0.925561	9	0.0683932	0.376476	0.858378	9	0.0173983
523	EED95029.1	495	56336.2	AFVALLEK;ENVALDIGGYR;GWFADAVSHLK;LDVTTYSWQK;DIDICHWESFGK;DRDICFTFNGTTSGVR;IWCGATVETADVEALMPWLK	1;0;1;0;1;1;0	4	11	155852;155853;155857;155859;159510;159511;159517;159522;159523;240632;240637;246066;246071;246072;248266;297258;297259;297262;302819;358751	XP_002287586.1	predicted protein [Thalassiosira pseudonana CCMP1335]	1.08257	9	0.0622938	0.244561	0.924583	9	0.0469953	0.263818	1.39962	11	0.00489951	0.0402923	1.09684	11	0.214679	0.570576	0.632979	11	0.00049995	0.0097762	0.621379	11	0.00039996	0.00742194	0.737948	10	0.00019998	0.00571371	0.77527	11	0.00889911	0.0777592	1.20191	11	0.0108989	0.131665	1.27873	11	0.009999
524	EED87340.1	668	69508.3	LETMIDIR;TSPFPYGGAR;MAIASPGNDFR;AVGSSQNVSMVNTVLNTIVAEK;AVCDAAEEVVPANLWTLATYK	1;0;1;0;1	3	19	93775;93785;93786;111631;111644;111647;111648;111658;111659;111661;150608;150612;150617;150618;150619;150620;150621;155567;155568;155570;155571;155573;357753;357754;357755;357756;357757;358322;358324;358325;358326;358329;358330;358331;358334;358335;358336;359657;359658;359659;359660	XP_002295274.1	hypothetical protein THAPSDRAFT_270138 [Thalassiosira pseudonana CCMP1335]	0.959038	19	0.464554	0.764992	0.960035	19	0.408359	0.724275	0.662778	18	0.0001	0.00211861	0.729474	14	0.0001	0.00261133	1.31525	19	0.0001	0.0035271	1.18298	19	0.00709929	0.0635757	0.990098	19	0.883612	0.978638	0.931484	18	0.275872	0.658748	0.768419	18	0.0001	0.0049995	0.932587	15	0.191281
525	EJK75201.1	92	112062	IIGMDEPLGLR;NSVEYLVK;LPNTLNALGIK;IFEEGPPSIVPK;FIGPTGPVMSVLGDK;ANNIDTSWLDGIIK	1;0;1;0;0;1	3	9	161896;161897;166777;166778;166779;175230;175233;175238;228235;262946;262947;262948;262954;299145;299146;305386;305387;305388	-	hypothetical protein THAOC_03084 [Thalassiosira oceanica]	0.915022	7	0.138686	0.403736	1.09871	9	0.135686	0.480367	0.834067	8	0.0509949	0.212597	0.940546	8	0.178882	0.513289	1.39624	9	0.030197	0.180478	1.89888	9	0.00139986	0.0195329	1.2702	9	0.0336966	0.21818	1.77222	9	0.00039996	0.008181	0.93667	8	0.152685	0.529216	0.956213	9	0.610239
526	EJK55119.1	97	85339	DDIVPLLR;DFYQSAFR;NKDDIVPLLR;GVVDSQDLPLNVSR;VMDIIINSLYSNR;VFINDKFEDIVPR	1;0;1;0;0;0	2	4	79735;106141;235051;235053;235054;237788;237789;237791;237792;237801;250097;250105;250130;309239;309243;309244	-	hypothetical protein THAOC_25185 [Thalassiosira oceanica]	0.688197	4	0.0277972	0.14031	0.878797	4	0.338566	0.685501	0.787054	4	0.0884912	0.303674	1.00874	4	0.925507	0.97334	0.932676	4	0.624238	0.896968	0.867867	4	0.280372	0.657051	1.1114	4	0.363764	0.750611	1.05001	4	0.635936	0.906968	1.16915	4	0.10229	0.446897	0.80697	4	0.0348965
527	EJK70567.1	372	26976.7	ADLLTANQGR;VTNLAPLEFPCK;AYTEDGMMRPIQTLIGTR;QLNAQVELLNGPNNFK	1;0;1;0	2	42	113438;113440;113442;113443;113450;113462;113463;113464;113465;113467;113470;113476;113477;113484;277559;277564;277567;277568;277569;277570;277571;277572;277575;326942;326944;326948;326949;326951;326952;326954;328521;328522;328524;328525;328526;328527;328528;328529;328531;328534;330036;330037;330038;330039;330041;330043;330049;348940;348942;349761;350502;331669	-	hypothetical protein THAOC_08056 [Thalassiosira oceanica]	1.26384	52	0.0001	0.00219734	0.881636	51	0.0001	0.00353298	1.38117	52	0.0001	0.00211861	0.969959	52	0.271773	0.634938	1.11151	52	0.020398	0.139528	1.74588	50	0.0001	0.00239976	1.26046	52	0.0001	0.0036731	1.99468	51	0.0001	0.00260844	1.11724	52	0.0001	0.0049995	1.43464	52	0.0001
528	EJK59411.1	762	111664	LTVENMFR;LQVIGATTISEYR;DVELPFAPPLKR	1;0;1	2	2	99215;226555;276159	-	hypothetical protein THAOC_20369 [Thalassiosira oceanica]	0.950206	3	0.820618	0.94922	1.27749	3	0.225677	0.600075	0.852017	3	0.343266	0.670014	1.17994	3	0.207679	0.558564	1.22471	3	0.371663	0.739625	1.24083	3	0.176082	0.524179	1.14696	3	0.357664	0.749471	1.17978	3	0.259574	0.63917	0.935214	3	0.486551	0.841701	0.752024	3	0.0350965
529	XP_002289250.1	228	109139	AVIEAANNFPR;FFAGQMTAAGK;AQTYDVLSSQANIAGYR	1;0;1	2	9	158036;158037;158039;158040;158041;222133;225971;225982;304355;304356;304358;304359	EED92787.1	NNT NAD transhydrogenase, partial [Thalassiosira pseudonana CCMP1335]	0.790798	9	0.0550945	0.228011	0.856246	9	0.0358964	0.217065	0.572248	9	0.00629937	0.0480727	0.629154	9	0.00269973	0.0304057	1.17768	9	0.0360964	0.20485	0.966164	8	0.49525	0.841556	0.984166	8	0.806919	0.955652	0.77643	9	0.059594	0.279347	0.781024	9	0.0136986	0.150883	0.827162	7	0.00539946
530	XP_002291491.1	33	93141.7	LGFGDQAPR;TYVGAMPGK;FSVGGMSDVSEIK	1;0;1	2	3	85184;85187;171203;271192	EED91598.1	atp-dependent serine protease, partial [Thalassiosira pseudonana CCMP1335]	0.92863	3	0.586941	0.839419	1.01856	3	0.854215	0.946897	0.751639	3	0.122788	0.379967	0.835574	3	0.177582	0.511187	1.27782	3	0.0986901	0.37695	0.968073	3	0.818418	0.954114	1.08516	3	0.491651	0.853396	0.826858	3	0.253975	0.632302	0.853472	3	0.126387	0.487532	0.932432	3	0.549945
531	EJK77442.1	129	88204	QNLYIIR;EIIGHHQVEGVIR;YSFPPGGVVNEVAQDLIQR	1;0;1	2	5	74112;235025;235028;235031;330405;330406;330411;330412	-	hypothetical protein THAOC_00726 [Thalassiosira oceanica]	0.876642	8	0.0149985	0.0903923	0.938048	8	0.213379	0.58655	1.0252	8	0.685631	0.892178	1.09215	8	0.159084	0.477093	0.958394	7	0.433257	0.781166	1.00788	6	0.914909	0.979701	1.21196	8	0.0360964	0.224822	1.24647	8	0.0129987	0.0995645	1.17814	8	0.00119988	0.0287971	0.960833	8	0.573543
532	EJK63057.1	867	76305.5	GAELIIITDNK;GFGEPIAMEGALK;GAELIIITDNKK	1;0;1	2	3	236038;264345;264349;264351;264375;312594;312595	-	hypothetical protein THAOC_16308 [Thalassiosira oceanica]	1.11559	6	0.10399	0.336426	1.15518	7	0.179282	0.546643	1.29833	7	0.0136986	0.0862631	1.27547	7	0.00579942	0.0519928	0.888941	7	0.254875	0.616186	1.05448	7	0.688931	0.908744	0.996774	7	0.960004	0.993108	1.20257	7	0.0627937	0.290562	1.04852	6	0.312169	0.712628	1.03035	7	0.764924
533	EJK69682.1	167	67537.2	TDSIIESIVR;YGLPVDFTAVLYK;KGSPVVPGSLEK	1;0;1	2	3	136075;293789;293790;293792;296568;296569	-	hypothetical protein THAOC_09034, partial [Thalassiosira oceanica]	1.5064	4	0.00509949	0.0412075	1.05636	5	0.344666	0.687641	1.8493	6	0.00069993	0.0090041	1.58051	5	0.00029997	0.00607355	0.762674	6	0.0161984	0.117504	0.742768	6	0.0250975	0.151089	0.996273	6	0.949005	0.991148	0.981783	6	0.807219	0.955407	1.27276	6	0.029797	0.234212	1.20257	6	0.110289
534	EED86316.1	891	56074.4	VTYELENLPMR;NQIGSSAMAYK;GTTGTQATFLELFNGDHDK	1;0;1	2	4	205256;205265;209343;231942;348879	XP_002297353.1	adenylosuccinate lyase [Thalassiosira pseudonana CCMP1335]	0.997357	4	0.982702	0.993174	0.906973	3	0.334767	0.685302	1.10369	3	0.556244	0.827247	1.05913	3	0.660034	0.891065	0.757753	4	0.186681	0.527541	0.993139	4	0.954005	0.988246	0.778528	4	0.10369	0.447581	1.03039	4	0.772823	0.949878	1.01538	4	0.864614	0.969441	1.01712	4	0.846715
535	XP_002286266.1	76	52636.9	LNDLIEMK;MLDMGFEPQIR;SVCCYGGSPK	1;0;1	2	4	182815;198164;198167;198168;202223;202224;202225;202227;202229;202241;206287;218716;218717;218718	EED95907.1	predicted protein [Thalassiosira pseudonana CCMP1335]	0.808093	3	0.152485	0.428002	1.11446	4	0.322668	0.681155	0.966495	4	0.845115	0.939443	1.24304	4	0.0554945	0.255105	0.645937	4	0.00189981	0.0262904	0.576891	4	0.0009999	0.0153831	0.712166	4	0.0148985	0.129552	0.629383	4	0.0251975	0.161984	1.07464	4	0.341066	0.731498	0.817742	4	0.0986901
536	XP_002292986.1	27	36446.3	IADLPDNSVIGTASLR;GSPLALAQAYETR;QAQILAQNPTLK	1;0;1	2	4	23470;267823;267827;208437;208438;208439;265330	EED89447.1	porphobilinogen deaminase [Thalassiosira pseudonana CCMP1335]	0.943857	4	0.556644	0.825575	0.885146	4	0.122388	0.449723	0.9337	4	0.652935	0.876256	0.874604	4	0.213079	0.567161	0.938955	4	0.629537	0.90012	1.15483	4	0.254675	0.636686	0.964707	4	0.834317	0.961056	1.20832	4	0.10119	0.380212	1.00996	4	0.923908	0.981141	1.08701	4	0.337166
537	EED96348.1	710	33769	APEGSVLVAMLPDTGER;GYPCVITMAEPFSVER;KAPEGSVLVAMLPDTGER	1;0;1	2	17	286007;286008;286009;286010;286012;304217;304219;304220;304221;304225;306296;306299;306304;336360;336361;336362;337442;337449;337452;338503;338506;338507;338509;338511;338515;338516;338517;338518	XP_002286707.1	cysteine synthase [Thalassiosira pseudonana CCMP1335]	1.46897	17	0.00089991	0.0113401	0.985644	16	0.768623	0.913546	1.18236	16	0.0186981	0.105235	0.870624	17	0.0717928	0.298089	1.39161	16	0.0001	0.0035271	1.6277	16	0.0001	0.00239976	1.26814	17	0.0001	0.0036731	1.54172	17	0.0001	0.00260844	0.876466	17	0.0411959	0.28411	1.32442	16	0.00089991
538	YP_009093242.1	42	14928.1	VTDNIADMLTR;HQIVEIPATK;ELGIGGEVLCYIW	1;0;1	2	5	172647;177867;177872;177885;223989;223990;223991;240033	AIR75915.1	ribosomal protein S8 (chloroplast) [Roundia cardiophora]	0.508862	5	0.00089991	0.0113401	0.976618	4	0.744226	0.909461	0.347582	5	0.00049995	0.00714611	0.73461	5	0.0515948	0.244026	0.659748	5	0.157884	0.48418	0.982766	5	0.950005	0.987099	0.48526	5	0.00369963	0.0459264	0.829714	4	0.226377	0.598354	0.759354	5	0.0170983	0.172904	0.52344	5	0.00469953
539	XP_002287200.1	874	72043.2	DTQWINR;VASLAELNR;WFVSEGTR;EGPTALILSR;AALATAANEAR;VIQEIAK;VVSMPCVEAYER;KEGPTALILSR;FGFSAPGDIVMK;NYINDGGNFGAGFDK	1;0;0;1;1;1;1;1;0;0	6	47	77296;77299;77308;88613;88630;88631;88632;88639;88643;88644;88646;91147;112965;112967;112968;112969;112974;112975;112990;113451;113454;113459;113460;113468;113469;113471;127512;127532;127534;127535;127538;223694;223696;223697;223698;223703;223704;223708;223710;223727;227611;227613;227616;286370;286372;286373;286375;288875;235636;235637;235638;235639;235640;235641;235642;235643;254188;254191;25419…	EED94643.1	transketolase [Thalassiosira pseudonana CCMP1335]	1.44602	46	0.0001	0.00219734	0.982546	45	0.39936	0.718572	1.52235	47	0.00029997	0.00478094	1.06383	45	0.124688	0.410762	1.22396	45	0.0001	0.0035271	1.5409	45	0.0001	0.00239976	1.33958	46	0.0001	0.0036731	1.74318	47	0.0001	0.00260844	1.03218	46	0.419658	0.791548	1.48539	47	0.00019998
540	EED91877.1	391	99635.1	AEAMLEALR;CAACTGLGIAYAGSAR;SATSSMTSVPKPLK;VGQAVETVGQAGKPK;AELGTEEVLSVSSVLEGIVIVK	1;0;0;1;1	3	3	97430;259184;325940;327526;329341;358135	XP_002290125.1	26S proteasome regulatory subunit RPN1 2 [Thalassiosira pseudonana CCMP1335]	0.900704	3	0.574743	0.835905	1.13564	3	0.560744	0.829191	0.847692	3	0.338266	0.66727	1.13768	3	0.318168	0.677706	0.809273	3	0.437056	0.781575	0.918532	3	0.870713	0.971791	0.798579	3	0.40106	0.788035	0.921239	3	0.846715	0.968273	0.999554	3	0.9984	0.9985	0.791446	3	0.0712929
541	XP_002296128.1	447	49585.8	GTSFGAPCALENELAK;VIGGGLPVGAYGGK;FTNSGTEACMGMIR;ATLCAEYNNLDAVK;GVYLAPSMYEAGFMSMSHTDEDIER	1;0;0;1;1	3	8	161053;317926;317936;249138;249139;254500;260900;307961;307964;307968;307969;367400	ACI64845.1	predicted protein [Thalassiosira pseudonana CCMP1335]	0.774351	8	0.0362964	0.172575	1.01848	8	0.748325	0.911753	0.856899	8	0.20398	0.508819	1.14001	8	0.116388	0.394988	0.673424	8	0.0039996	0.0425756	0.855575	7	0.0210979	0.134192	0.776846	8	0.00469953	0.0563944	1.06623	8	0.429257	0.799858	1.24249	6	0.00179982	0.0372377	0.779696	8	0.10059
542	EED89383.1	693	44376.3	GNLYVLFR;ILEVLVEK;KGADLLITK;IVPNEGMPSHGNPFVK;TLSLNEALCGFEWIVK	1;0;0;1;1	3	5	91303;91304;172180;172182;172183;252992;324383;324385;338135	XP_002293647.1	DnaJ protein [Thalassiosira pseudonana CCMP1335]	0.579302	4	0.00089991	0.0113401	0.817751	5	0.0089991	0.0876561	0.546971	3	0.0127987	0.0832148	0.782906	4	0.0325967	0.177998	0.855182	5	0.0679932	0.306566	0.780988	5	0.0264973	0.156892	0.744321	4	0.00969903	0.0964544	0.719178	5	0.0157984	0.114666	0.964337	4	0.609839	0.893901	0.812735	5	0.0144986
543	AFM78112.1	921	33937.8	EPTLPVR;GGFEAAIAK;LPISNIYNIK;SDKCPWYK;YHYTIVDAPGHK;FNEIKEEFVK;NMITGSATADVGLLLVPAEK;GVGQIICGTVEQGTLLPGDVIGICPSGLK	1;0;0;1;0;0;0;1	3	7	48678;147364;147373;147391;147392;147402;147403;147406;147411;147414;147415;147416;233256;233265;233266;233272;233273;233274;233277;233279;233280;233281;233283;233284;233287;233289;233290;233291;233293;277333;279831;279840;279843;279845;279851;279853;279856;279857;279858;279860;279862;279863;279864;279878;279887;279888;279913;322524;322528;322530;322531;322532;322534;322535;322537;308612;308625;3…	-	translation elongation factor-like protein, partial [Skeletonema costatum]	0.818243	6	0.0108989	0.0714176	0.840293	7	0.157084	0.520342	0.602792	6	0.00029997	0.00478094	0.590125	6	0.00029997	0.00607355	0.747413	5	0.00469953	0.0474969	0.644167	6	0.0325967	0.182218	0.646921	6	0.00059994	0.0130107	0.446283	7	0.00249975	0.03333	0.845455	6	0.00569943	0.0869405	1.0516	7	0.615738
544	EJK62766.1	86	35768.1	ELQAPYELVK;GGVIMDVMNVEQAK;NIGEALR;QGLAQMLK;NAVTIPVMAK;IAEAAGAVAVMALER;AVTHYKDPK;TKGEAGTGNIVEAVR	1;0;0;1;0;0;0;0	2	9	14097;236676;236678;236679;236681;236683;236691;236692;35940;294624;294630;294631;294632;294644;294645;294646;294647;294648;297274;297277;41004;155092;201205;201207;231463;231467;231473;235217;235225;272612;272613;296542;296545;296546;296551	-	hypothetical protein THAOC_16609 [Thalassiosira oceanica]	1.06309	9	0.157684	0.437823	1.02899	9	0.357464	0.694128	1.05546	8	0.366763	0.686142	0.969904	9	0.627237	0.885578	0.646928	9	0.00319968	0.0376224	0.468891	9	0.00019998	0.0040905	0.635021	9	0.00019998	0.00571371	0.462626	9	0.0001	0.00260844	0.969588	9	0.556744	0.877688	1.06626	5	0.345765
545	EJK56278.1	261	44336	ELFVMAR;VSGAELVQK;AVCTEAGMFALR;NIDLSTIAEK;GVLLYGPPGTGK;KIEFPNPNAENR;TMLELLNQLDGFEPAQNIK	1;0;0;1;0;0;0	2	4	60766;64625;168424;195305;199509;216166;216194;229298;229300;229303;229304;229306;284695;354541	-	hypothetical protein THAOC_23874 [Thalassiosira oceanica]	0.539446	4	0.00119988	0.0143191	0.724086	4	0.00559944	0.0615256	0.446019	3	0.00179982	0.018956	0.618254	3	0.00539946	0.049642	1.00173	4	0.993801	0.997683	0.791957	4	0.273173	0.649552	1.13708	3	0.284672	0.702176	0.813933	4	0.165483	0.498945	1.00096	4	0.993301	0.998292	0.75195	3	0.0350965
546	sp|A0T0T0.1|PSBD_THAPS	52	39248.7	NILLNEGIR;AYDFVSQELR;AFTPTQSEETYSMVTANR;SWMAAQDQPHENFVFPEEVLPR	1;0;0;1	2	14	13941;108762;108773;108775;166097;166098;166099;166103;166109;166110;324981;326572;326573;326575;326576;326577;359679;359680;359682;359683;360176;360178;360179;360180;360181;360182	AIR75584.1;YP_009093186.1;AIR75443.1;ADB27516.1;EJK55847.1;EJK54216.1;ABK20765.1;EJK52340.1;YP_874542.1;YP_004072562.1;AIR75859.1	RecName: Full=Photosystem II D2 protein; Short=PSII D2 protein; AltName: Full=Photosystem Q(A) protein	0.479278	14	0.0001	0.00219734	0.823762	14	0.0311969	0.200628	0.369037	14	0.00019998	0.00360164	0.644685	14	0.00509949	0.0481114	1.22595	14	0.0341966	0.197812	1.26258	14	0.0279972	0.16309	0.997483	14	0.970703	0.993867	1.03685	14	0.581842	0.880097	0.851674	12	0.0009999	0.0264679	0.619131	14	0.0001
547	EED95307.1	398	38075.7	GMGGAIAK;LESSNPANSVK;LILTMPESMSMER;IVAVEPAESAVLSGGKPGPHK	1;0;0;1	2	2	103653;226355;226356;226359;226367;226372;246629;246631;246632;250027;250029;250035;250038;250051;250063;253434;253435;253437;253438;253449;256544;360435	XP_002287864.1	predicted protein [Thalassiosira pseudonana CCMP1335]	1.33117	2	0.294371	0.613969	1.21625	2	0.337666	0.685501	1.77875	2	0.130587	0.397088	1.49892	2	0.10409	0.368506	0.67556	2	0.121388	0.42819	0.823722	2	0.558844	0.865488	0.836243	2	0.40136	0.788035	0.927693	2	0.780922	0.9518	1.16942	2	0.360564	0.754588	1.06198	2	0.779122
548	EJK52971.1	1489	86152.4	MSEALIR;EYIPGVVK;MDFPEPVIK;NIGIMAHIDAGK;GITITSAATTCEWR;HAVAGDIVALVGLK;EFNVEANVGAPQVSYR;INIIDTPGHVDFTLEVER;VLDGAVAVFDGVAGVEPQTETVWR	1;0;0;0;1;1;1;0;0	4	7	50212;160297;209185;248033;252827;252828;252829;272630;272631;292041;328453;328456;355988	-	hypothetical protein THAOC_27681 [Thalassiosira oceanica]	0.809641	7	0.0681932	0.260178	1.14832	6	0.0563944	0.290865	0.678664	7	0.0690931	0.255945	0.921117	7	0.662134	0.891087	0.791813	6	0.0128987	0.0974991	0.915266	6	0.214879	0.580753	0.704669	6	0.00049995	0.0113913	0.876966	7	0.260574	0.639719	0.875628	7	0.161084	0.546047	0.76813	7	0.00029997
549	EJK45128.1	194	110747	FCDAMLAIR;LCGSDLCVPK;SAHGTNPASAAMAGMK;SYIGMGYYDTIVPNVILR;FFVSQDVHPQTISLIQTR;DLALNHSMISLGSCTMK;FGVPMGFGGPHAGFLSTSDK;NMLENPGWYTAYTPYQAEIAQGR	1;0;0;0;1;0;1;1	4	6	18422;226985;226993;296429;296430;296433;329030;330477;330480;332791;332797;337936;346595;360985;360987	-	hypothetical protein THAOC_36273 [Thalassiosira oceanica]	1.02047	6	0.90301	0.979075	0.987803	6	0.909209	0.966605	0.824427	5	0.134587	0.400645	0.963853	6	0.727427	0.907011	0.67675	6	0.0556944	0.269339	0.666307	6	0.0748925	0.318692	0.680389	6	0.0159984	0.135835	0.664024	6	0.0256974	0.164026	0.999637	6	0.9962	0.9985	0.87037	5	0.223778
550	BAG30808.1	923	48332	QGGISAR;IAVMDSNR;GGFEAAIAK;GVTIQCNTK;AGPGDSVGLSIK;LPISNIYNIK;VQPGDIIYVQK;YHYTIVDAPGHK;FNEIKEEFVK;NMITGSATADVGLLLVPAEK	1;0;0;0;1;0;0;0;0;0	2	12	26121;70389;70390;147364;147373;147391;147392;147402;147403;147406;147411;147414;147415;147416;195158;195159;195160;195161;195162;195163;195170;215408;215410;215411;215412;215413;215420;215424;215425;215427;215430;215431;233256;233265;233266;233272;233273;233274;233277;233279;233280;233281;233283;233284;233287;233289;233290;233291;233293;252374;279831;279840;279843;279845;279851;279853;279856;279…	-	elongation factor-like, partial [Skeletonema costatum]	1.08681	12	0.0949905	0.3174	0.981224	12	0.753625	0.912141	0.96206	12	0.781622	0.921018	0.874876	12	0.420758	0.76432	0.987513	12	0.841016	0.961765	0.951744	12	0.438456	0.80287	0.90917	12	0.620638	0.902934	0.859598	12	0.354165	0.738698	0.902549	12	0.490551	0.845777	1.12673	12	0.177382
551	EJK74080.1	1333	89318.7	LATLSSGIR;GQVADMLK;LDDVVDLVIPR;FGLGAEVGISTGR;GSNALVSYIK	1;0;0;0;1	2	3	73664;146651;146652;151659;174497;177641;177642;203338;203341	-	hypothetical protein THAOC_04262, partial [Thalassiosira oceanica]	0.562276	3	0.0246975	0.129	0.780065	3	0.287471	0.661204	0.514718	3	0.00719928	0.0531389	0.719627	3	0.0317968	0.176845	0.701591	3	0.208979	0.557475	0.537734	3	0.0879912	0.357526	0.677435	3	0.00819918	0.0853094	0.514986	3	0.00539946	0.0552218	0.963469	3	0.79892	0.947336	0.759926	3	0.0634937
552	EJK72506.1	238	60528.8	GAMIFYR;AVLDALGSVLSNK;YFESMPYR;LIVAGASAYSR;SSLVLIASENFTSR;ILELACIASNK;NTVPGDTSALNPGGIR;EMCAVGPSVDPELVQLR	1;0;0;0;0;1;0;0	2	4	62536;85054;257722;257727;257728;257729;257730;257731;257732;257733;257736;257737;257738;257744;123469;123471;128410;128416;128417;128421;128422;243487;243491;243492;243493;243498;243499;243500;243501;246328;246333;246334;253264;253265;253266;309642;309647;309649	-	hypothetical protein THAOC_05958 [Thalassiosira oceanica]	1.65706	38	0.0001	0.00219734	1.14588	37	0.00029997	0.00858009	1.45676	38	0.0001	0.00211861	1.02149	37	0.656434	0.891065	1.28706	37	0.0001	0.0035271	1.20671	38	0.00019998	0.0040905	1.17069	37	0.0001	0.0036731	1.11964	38	0.00239976	0.032478	0.91548	38	0.00659934	0.0957969	1.45615	38	0.0001
553	EJK74953.1	98	155976	DDTHYVSLIAELESR;NPDVLPTGR;LLDTNPNAFR;ELISSYQGLR;SVVADFMK;IDVVVSCSGVFR;QVGMSGTCYPDR;TAPTVGIILQK;DLFINQMNLMDR;FYEGMLSTGYEGVR;DQLDAVLIFPSMPEVMR;GNVGTAAYLDVFDSIK;NMHALDPSAIPTQAAVEVAEDVVR	1;0;0;0;0;0;0;0;0;0;1;0;1	3	10	62771;87478;144923;144924;146620;157724;157725;162703;198483;198484;198485;198486;206792;225136;225137;225140;240306;240317;243917;243922;247476;247477;247480;264428;264430;316979;318858;318860;318861;318862;320650;318580;357184;357185;357186	-	hypothetical protein THAOC_03343 [Thalassiosira oceanica]	0.871513	35	0.00339966	0.0320743	0.939169	34	0.166083	0.53348	0.889716	35	0.0327967	0.156676	0.96974	34	0.583742	0.862868	1.08265	31	0.0305969	0.181657	1.08518	33	0.0824918	0.340562	1.16745	33	0.0001	0.0036731	1.11428	35	0.0119988	0.0943137	1.00543	33	0.871113	0.969441	0.931781	33	0.0578942
554	EED92889.1	72	74611.7	ELVELPLR;FPELWTTAGVPTPK;GVLLHGPPGCGK;GVLFYGPPGCGK;LDQLIYIPLPDLESR;GPELLNAYFGGSEANVR;AIANECGANFISVK;VINQILSEIDGIGSGK;TLFIIGATNRPDILDPGIMRPGR	1;0;0;0;0;0;0;0;0	1	5	87628;87629;87632;87633;87639;135577;303244;237168;237169;237170;250627;250631;250632;250637;292957;294383;294384;294385;295182;295191;315426;356331;356889	XP_002289352.1	cell division cycle protein 48 [Thalassiosira pseudonana CCMP1335]	0.827159	3	0.189281	0.474387	0.977857	5	0.694931	0.891926	0.622234	4	0.00839916	0.0595547	0.816035	3	0.140886	0.442607	1.22206	5	0.0306969	0.181657	1.23292	4	0.0876912	0.357526	0.988718	4	0.90251	0.980924	1.04285	4	0.683432	0.927558	0.867282	5	0.0359964	0.256101	0.831834	5	0.0319968
555	AIE44732.1	11	24004.3	ETDVLALFR;VVYEGLK;IPHSYLK;AVAALRLEDMR;TFQGPATGIIVER;YESGVIPYAK;GGLDFLKDDENINSQPFMR;GGLDFLKDDENINSQPFMRWR	1;0;0;0;0;0;0;0	1	1	115011;129749;129778;129784;145418;171482;211483;221651;221660;221661;221662;221674;221676;221678;221679;221680;221682;221684;285025;285027;285034;285035;355372;355380;355381;355382;355383;355384;355386;355390;355391;355392;355393;355395;355397;355398;355399;356007;356008;356009;356010;356012;356013;356015;356016;356018;356019;356020;356021;356022;356023;356025;356028;356029;356031;364546	-	ribulose-1,5-bisphosphate carboxylase/oxygenase large subunit, partial (chloroplast) [Skeletonema tropicum]	0.310117	1	0.0261974	0.134495	1.27694	1	0.381562	0.705205	1.62108	1	0.352665	0.678328	6.69431	1	0.00379962	0.0398076	2.7301	1	0.0230977	0.150553	3.26999	1	0.019598	0.128278	10	1	0.00069993	0.0143167	10	1	0.00119988	0.0183033	5.1345	1	0.00119988	0.0287971	0.253075	1	0.00389961
556	YP_004072604.1	105	101575	EYQLSYR;DQISMGQIYR;NLGGLYIIGTER;FFLSLEDSLFR;ETILAYGEQVIK;WNEGLHQAVEAK;YLFDYDDILNK	1;0;0;0;0;0;0	1	2	84628;84631;160780;165737;165741;190338;207632;207719;272809;272810;272811;272814;276096;276102;282943;282949	ADB27612.1;YP_004072659.1;ADB27557.1	preprotein translocase protein SecA (chloroplast) [Thalassiosira oceanica CCMP1005]	0.70003	2	0.193881	0.481478	0.96389	2	0.847415	0.945175	0.697505	2	0.270773	0.588471	0.966885	2	0.893911	0.970516	1.11488	2	0.665433	0.912715	1.06102	2	0.831117	0.959674	1.15602	2	0.494351	0.854656	1.11731	2	0.680432	0.926458	1.02615	2	0.881712	0.971991	0.754758	2	0.188981
557	EJK74801.1	420	58782.4	EVGVIGWGSQAPAQAQNLR;DLFPLLPK;GILLGAVHGIVESLYR;GVAFMVDNCSFTAK;SDLVMLLISDAAQAALYK;EILQEIYDEVSSGNEIR	1;0;0;0;0;0	1	7	163630;319371;319372;319376;319378;319379;319380;172171;172173;172174;278304;303571;303574;303575;305724;305727;305729;342274;345750;345754;345757;345758	-	hypothetical protein THAOC_03504 [Thalassiosira oceanica]	1.09034	22	0.0956904	0.318144	1.09277	22	0.0605939	0.3008	1.12753	22	0.106389	0.347115	1.15454	22	0.00809919	0.0666427	1.0882	19	0.110089	0.404184	1.01417	19	0.80042	0.949629	1.09962	20	0.00629937	0.0695636	1.06285	18	0.0566943	0.270689	1.0322	21	0.423958	0.791548	0.999192	22	0.988801
558	EED91929.1	1301	44081	AFVLFPK;AGADIILTYYAK;TNLACEAYNPEGIVHR;DALDSHPGFGDKK;DALDSEGFTNVSILSYTAK	1;0;0;0;0	1	6	134081;134082;134084;134085;134086;134087;260211;260212;260213;260214;302512;302517;302518;302528;302529;335419;320926;347842;347843;347846;347849;347852	XP_002290177.1	predicted protein [Thalassiosira pseudonana CCMP1335]	1.54676	6	0.00239976	0.0248527	0.84518	6	0.10379	0.414698	1.92166	5	0.00039996	0.00610447	0.962187	6	0.544846	0.841312	1.05174	6	0.424858	0.777537	1.26884	6	0.190881	0.547111	1.23499	6	0.0332967	0.216368	1.52235	6	0.0522948	0.257187	1.15431	6	0.0879912	0.414097	1.76776	6	0.0019998
559	EED86175.1	58	34233.8	VPYDVNR;YLTYPFYAGGNR;AIEIEAPQGVLPNSVFEIEIK;GVFISPYSTEFDNILVVGPIAGK;QQISADGKPADLNVGGILILPK	1;0;0;0;0	1	1	146902;219464;219480;219481;219482;219492;358940;358942;362121;364497;364499;364500	YP_874531.1;sp|A0T0R9.1|CYF_THAPS;ABK20754.1;XP_002297535.1	predicted protein [Thalassiosira pseudonana CCMP1335]	0.622541	1	0.283672	0.601384	0.64313	1	0.146385	0.502523	0.381978	1	0.110189	0.35534	0.397937	1	0.0474953	0.230071	0.638573	1	0.237976	0.592963	0.80364	1	0.60354	0.887705	0.425644	1	0.0326967	0.214015	0.519784	1	0.136086	0.450617	0.694141	1	0.152885	0.529216	1.02878	1	0.922908
560	EED94804.1	501	33178.2	IAYVIDVR;AGLNTLIK;RAELTSEGIK;SAIGELELDEILHNR;RYELTEITPDDQIR	1;0;0;0;0	1	2	81826;81833;136546;216198;280505;280506;280508;280509;326995	XP_002287361.1	hypothetical protein THAPSDRAFT_32022, partial [Thalassiosira pseudonana CCMP1335]	0.613243	2	0.0868913	0.299958	0.789648	2	0.220378	0.592831	0.427307	2	0.0230977	0.124176	0.559404	2	0.0290971	0.166454	1.62289	2	0.0580942	0.277219	1.19513	2	0.520848	0.851893	1.19775	2	0.39736	0.785842	0.886897	2	0.653135	0.915597	0.752943	2	0.10279	0.447994	0.808924	2	0.321268
561	AIR75515.1	688	104826	VIMLAQEEAR;FFRPEFLNR;NNPVLVGEAGVGK;KNNPVLVGEAGVGK	1;0;0;0	1	5	144650;144651;144669;144671;144673;165577;251124;251126;251130;320414	AIR75656.1	Clp protease ATP binding subunit (chloroplast) [Cyclotella sp. L04_2]	0.630313	5	0.00449955	0.0377125	0.824127	5	0.125887	0.457357	0.596584	5	0.00129987	0.0146317	0.711375	4	0.0185981	0.122761	0.546426	5	0.00029997	0.00719528	0.724892	5	0.0418958	0.217955	0.543222	5	0.00089991	0.016362	0.724137	5	0.0870913	0.355475	0.981214	5	0.792821	0.945559	0.796063	5	0.00979902
562	EJK75009.1	208	50800.9	SNIVVAVR;MVEALELFR;MLLLGAGESGK;SAVNIIDSHK	1;0;0;0	1	1	58861;128345;133282;133286;209239;213244;211288	-	hypothetical protein THAOC_03280 [Thalassiosira oceanica]	0.707843	1	0.418458	0.723668	0.869163	1	0.619838	0.859509	0.634674	1	0.376662	0.694339	0.782333	1	0.486951	0.805033	1.32447	1	0.440456	0.78215	1.03551	1	0.937206	0.982511	1.24513	1	0.469953	0.83837	0.985325	1	0.975802	0.995506	0.931184	1	0.763524	0.934927	0.839237	1	0.562544
563	EJK44301.1	684	46921.2	CVVTDLR;GVYETPGGTLLR;FEMCAQALDAK;HGIPVDAKPK	1;0;0;0	1	1	59971;177279;177280;177282;177284;177287;177292;252935;257010;257016;257021;257022;257023;273172;273173	-	hypothetical protein THAOC_37170 [Thalassiosira oceanica]	0.83234	1	0.657034	0.8711	0.924977	1	0.777722	0.913546	0.845355	1	0.733627	0.905344	0.942099	1	0.866913	0.956266	0.607531	1	0.191781	0.531608	0.46268	1	0.0950905	0.371286	0.645905	1	0.182282	0.574619	0.494107	1	0.112489	0.408225	1.04531	1	0.855114	0.966982	0.924462	1	0.792021
564	EJK46643.1	112	28736	LGTLVHQK;HVTTLVEEK;MEVPFLIVK;KMEVPFLIVK	1;0;0;0	1	2	157529;157530;204268;204272;209269;209270;213297;297515;297516;297517;297518	-	hypothetical protein THAOC_34681 [Thalassiosira oceanica]	0.724452	10	0.00609939	0.0457963	0.79132	9	0.00059994	0.0138602	0.719192	11	0.00129987	0.0146317	0.808197	10	0.0039996	0.0411845	0.466403	11	0.00029997	0.00719528	0.408648	11	0.0001	0.00239976	0.520377	11	0.00019998	0.00571371	0.453673	11	0.00019998	0.00473637	1.09029	11	0.113889	0.4638	1.08185	10	0.333267
565	BAA75795.1	132	16039.7	QVAYAMNK;SYSVQANPEGSR;GWAMNVEWTDDPHPR;NNYWELWGLPLFDIK	1;0;0;0	1	5	166506;171442;171443;171444;171448;187248;187250;187251;187252;187253;187254;187256;187257;187258;187259;187260;187261;187263;187264;187265;187266;187267;187275;259222;259225;259227;259228;259230;259231;259235;259241;259242;259243;259245;259246;259247;259248;259249;259250;259252;259255;259257;259258;259259;259262;259263;259270;259273;259274;259275;259295;297239;340040;340044	sp|O98948.1|RBS_THANO	ribulose-1,5-bisphosphate carboxylase/oxygenase small subunit (chloroplast) [Thalassiosira nordenskioeldii]	0.79653	4	0.0510949	0.216894	0.918413	5	0.163484	0.529567	0.696507	4	0.0260974	0.133907	0.86752	5	0.163284	0.482356	1.161	5	0.30377	0.677177	1.21952	5	0.121388	0.429215	1.12887	5	0.106389	0.453793	1.26482	4	0.0536946	0.261217	0.969118	3	0.740226	0.926988	0.978056	5	0.805919
566	EJK65817.1	444	190892	SLESAPLANIR;LVSSIGIGTVACGVAK;SDSANLDAVFELMTK	1;0;0	1	2	148288;148295;301397;315176;315180	-	hypothetical protein THAOC_13288 [Thalassiosira oceanica]	0.948284	2	0.847115	0.957471	0.920444	2	0.665033	0.884231	0.837787	2	0.589441	0.840525	0.818297	2	0.410859	0.75559	0.743031	2	0.334867	0.704801	0.870318	2	0.619638	0.895577	0.688511	2	0.110889	0.460323	0.810555	2	0.434557	0.804734	0.923625	2	0.646135	0.907766	1.05266	2	0.811119
567	EJK65981.1	1176	57685	VLDDPDFSFIK;DAGGNITNYVGVQCK;NAIEEGSDMSVCLLNYR	1;0;0	1	1	259510;309657;318172	-	hypothetical protein THAOC_13120 [Thalassiosira oceanica]	0.906184	3	0.640636	0.868667	0.812627	3	0.266073	0.641583	0.9525	3	0.777222	0.921018	0.848035	3	0.613539	0.876962	0.789581	3	0.108589	0.40362	0.936401	3	0.644936	0.901167	0.85722	3	0.476952	0.845301	1.03148	3	0.867913	0.969879	1.06357	3	0.710329	0.925659	1.14753	3	0.531847
568	EJK46401.1	108	53245.7	LSGDELIAFYK;VNQIGSISESIDAVK;HYADIAGNPTPDVLPVPCFNVINGGEHAGNK	1;0;0	1	2	251491;251493;305391;305392;305393;305394;305395;305404;305405;369555	-	hypothetical protein THAOC_34936 [Thalassiosira oceanica]	1.09329	2	0.743126	0.907131	1.09424	2	0.639936	0.870608	1.23504	2	0.518348	0.795861	1.24825	2	0.362164	0.708598	1.0186	2	0.940606	0.99014	0.946415	2	0.841616	0.962458	1.18323	2	0.430157	0.806185	1.11931	2	0.675032	0.922869	1.13941	2	0.450755	0.819535	1.00206	2	0.991201
569	EJK74745.1	36	51549.7	IDFEYAK;YEAAVCGGIPIIR;YPTANSCINDIVALAK	1;0;0	1	1	154123;218849;218851;218857;327141;327146;327148	EJK74746.1	hypothetical protein THAOC_03565 [Thalassiosira oceanica]	1.0586	1	0.884512	0.973071	1.0478	1	0.867313	0.949593	1.31287	1	0.584042	0.837997	1.30395	1	0.456054	0.789565	1.04539	1	0.90001	0.979117	0.885315	1	0.770523	0.943972	1.35348	1	0.328367	0.729459	1.16316	1	0.70423	0.93588	1.26829	1	0.331867	0.727373	1.02847	1	0.923408
570	EJK69497.1	446	50997.4	AVIDAVPSVEMVR;VIGGGLPVGAYGGK;FTNSGTEACMGMIR	1;0;0	1	9	210728;210739;210741;210742;210749;214642;214645;214646;214660;249138;249139;254500;260900	-	hypothetical protein THAOC_09237 [Thalassiosira oceanica]	1.03616	9	0.642936	0.869145	0.985073	9	0.879412	0.95579	1.08132	9	0.270873	0.588471	0.970355	8	0.50365	0.817637	0.917136	9	0.449655	0.790742	1.13007	9	0.333467	0.71437	0.914511	8	0.328267	0.729459	1.3209	8	0.00039996	0.008181	1.05669	9	0.341366	0.731498	1.06722	9	0.267373
571	EJK75011.1	868	42785.4	SIPTFESTPR;ADTNAINITLNSFGTPLNEPAMR;DINELIAQCHPLGMFK	1;0;0	1	4	136689;136691;136695;136696;249194;353750;353751;353752;353754;354428;354430;354433;338489;338492;339611	-	hypothetical protein THAOC_03282 [Thalassiosira oceanica]	1.18044	15	0.125787	0.379982	0.966521	15	0.621438	0.859509	0.921717	11	0.0918908	0.312255	0.880885	14	0.0231977	0.140748	1.31427	15	0.00379962	0.04168	1.23206	15	0.0251975	0.151185	1.17338	15	0.0059994	0.0674933	1.11377	15	0.080292	0.347447	0.910187	15	0.069793	0.380689	1.07811	13	0.194981
572	XP_002291084.1	829	40951.5	FTNQILR;AGAEFLVK;NFLYVEDVAR	1;0;0	1	1	67083;138166;165541	EED91191.1	dtdp-glucose 4,6-dehydratase [Thalassiosira pseudonana CCMP1335]	0.982082	1	0.966703	0.98641	1.18276	1	0.552645	0.828124	0.996729	1	0.993901	0.997779	1.21522	1	0.577942	0.862843	1.08692	1	0.815118	0.95334	0.833326	1	0.664934	0.903421	1.15174	1	0.639436	0.906141	0.893533	1	0.781222	0.9518	1.04462	1	0.856414	0.966982	0.844383	1	0.574643
573	EJK76432.1	569	37860.7	IVGDTHGQFYDLLR;GVSFTFGGDVVR;AHQVVEDGYEFFAGR	1;0;0	1	1	22955;170169;170173;170177;170178;283199;283200;283203;283204;324585	-	hypothetical protein THAOC_01805 [Thalassiosira oceanica]	0.610874	1	0.267973	0.580827	0.565149	1	0.0751925	0.34303	1.03079	1	0.954505	0.975631	0.74347	1	0.412259	0.755738	0.733813	1	0.405959	0.760623	0.500442	1	0.145685	0.479404	1.09616	1	0.761824	0.945401	0.772188	1	0.524448	0.854185	1.33797	1	0.241676	0.641617	1.32896	1	0.354765
574	EJK55276.1	1280	37621.4	SLVQEFITDDFK;LIDTANAPIFGVDTQGR;RDEQGNVIGVVGIGQDITAR	1;0;0	1	1	286733;293436;293439;331167	-	hypothetical protein THAOC_25008 [Thalassiosira oceanica]	1.09519	1	0.820918	0.94922	1.40222	1	0.247675	0.625962	0.887855	1	0.809419	0.930884	1.23109	1	0.554945	0.848579	1.02286	1	0.951705	0.990535	1.40329	1	0.425357	0.788069	0.869994	1	0.647335	0.908327	1.20498	1	0.640936	0.906968	0.871037	1	0.570643	0.88387	0.765887	1	0.385061
575	EJK53101.1	397	37241.3	IVLVIPSFGER;LESSNPANSVK;LILTMPESMSMER	1;0;0	1	8	166881;166882;166883;166884;166885;166888;166889;166890;226355;226356;226359;226367;226372;246629;246631;246632;250027;250029;250035;250038;250051;250063;253434;253435;253437;253438;253449;256544	-	hypothetical protein THAOC_27524 [Thalassiosira oceanica]	1.34249	8	0.0322968	0.15772	1.15505	7	0.0059994	0.0643507	1.05203	7	0.575142	0.836843	0.952634	8	0.614239	0.876962	0.948647	8	0.490851	0.822198	1.11938	8	0.155484	0.497108	0.777395	7	0.00049995	0.0113913	0.987962	8	0.827517	0.961608	0.875558	8	0.0890911	0.414097	1.09374	7	0.147985
576	XP_002288253.1	314	33295.1	LLDYTVDR;ADEIFGWLK;GIFISFGNASGAVPAFPVLR	1;0;0	1	3	10555;95054;95060;209936;209937;209938;209939;323651	EED93689.1	predicted protein [Thalassiosira pseudonana CCMP1335]	1.19295	3	0.382062	0.70293	0.702779	3	0.00949905	0.0905677	1.20078	3	0.288571	0.608567	0.693649	3	0.019998	0.128428	0.908693	3	0.523148	0.838968	0.813824	3	0.211179	0.575942	0.946509	3	0.737026	0.934892	0.854385	3	0.281172	0.660321	1.02868	3	0.762924	0.934828	1.70498	3	0.00309969
577	EED94578.1	1065	31332.1	EELALAVK;YLSGVGVAK;SQLPTLELDAVFEAK	1;0;0	1	3	150239;150243;150248;156877;156878;156879;156894;156896;156905;156906;317462;317468;317469;317481	XP_002287135.1	hypothetical protein THAPSDRAFT_268160 [Thalassiosira pseudonana CCMP1335]	0.746076	3	0.0706929	0.266503	0.804121	3	0.383962	0.707647	0.695339	3	0.0678932	0.254741	0.750349	3	0.0990901	0.355698	1.18233	3	0.225277	0.576785	0.806087	3	0.176182	0.524179	1.15129	3	0.243776	0.663378	0.792286	3	0.136086	0.450617	0.967273	3	0.723928	0.926988	0.960673	3	0.865713
578	EJK74825.1	1050	25325.4	LPYGPAGW;IAQLHDHIWCCR;SGSAADTQALTDYVR	1;0;0	1	1	59468;261278;304684	-	hypothetical protein THAOC_03479 [Thalassiosira oceanica]	1.30457	3	0.179382	0.461604	0.991097	3	0.934307	0.976578	1.11442	3	0.70103	0.895383	0.855078	3	0.233277	0.593406	0.85296	3	0.662134	0.912715	0.671321	3	0.29587	0.674819	0.764352	3	0.321068	0.728242	0.602239	3	0.09999	0.377698	0.892896	3	0.245475	0.642232	1.30447	3	0.30367
579	CAA10636.1	794	20135.9	GLCAGDFSK;GQGGVYNFVTK;DVICPLDLSTYFR	1;0;0	1	1	176019;231983;231984;259199;259200	-	Ycf24 protein, partial (chromoplast) [Skeletonema costatum]	1.09256	3	0.513649	0.798326	0.89144	3	0.528347	0.810972	1.16597	3	0.406959	0.71769	0.949138	3	0.808719	0.936576	0.68899	3	0.0692931	0.307611	0.757621	3	0.0993901	0.38391	0.756167	3	0.183282	0.576696	0.833133	3	0.247475	0.625148	1.08214	3	0.406659	0.782874	1.23146	3	0.225477
580	sp|A0T0N1.1|RK19_THAPS	213	13784.8	IQIGDTLK;KVLQGIGIER;VQFYEGTVIAK	1;0;0	1	1	154867;218483;251279	EED86161.1;ABK20716.1;YP_874493.1;XP_002297521.1	RecName: Full=50S ribosomal protein L19, chloroplastic	0.629223	1	0.292271	0.612409	0.667613	1	0.175682	0.544223	0.969967	1	0.952105	0.974796	1.02333	1	0.954305	0.985477	0.280169	1	0.00869913	0.0748791	0.458758	1	0.0922908	0.366307	0.451493	1	0.040396	0.245651	0.748053	1	0.471053	0.823999	1.56841	1	0.0894911	0.414097	0.972492	1	0.923908
581	YP_009093138.1	214	13781.9	IAVIEIIR;KVLQGIGIER;VQFYEGTVIAK	1;0;0	1	1	75914;218483;251279	AIR75811.1	ribosomal protein L19 (chloroplast) [Roundia cardiophora]	0.692575	1	0.392761	0.709884	1.00066	1	0.9982	0.9986	0.582472	1	0.306169	0.630905	0.85445	1	0.656834	0.891065	1.60645	1	0.216678	0.564116	1.92544	1	0.144686	0.476985	1.41231	1	0.272773	0.694471	1.73973	1	0.19728	0.560102	0.885465	1	0.613039	0.895673	0.718867	1	0.293671
582	EJK76030.1	1590	161393	NPAVAIPIVVNR;EFTFFLPDAVQEQAK	1;0	1	1	177432;329037	-	hypothetical protein THAOC_02229 [Thalassiosira oceanica]	0.853387	2	0.553545	0.823009	0.998363	2	0.991801	0.9986	0.744428	2	0.372263	0.691894	0.894904	2	0.651535	0.890271	1.13438	2	0.613239	0.89257	1.18056	2	0.549745	0.859515	1.03154	2	0.881312	0.978638	1.08495	2	0.763724	0.94605	0.925919	2	0.657334	0.911202	0.878557	2	0.542746
583	EJK67751.1	1482	132833	LLFLTER;EALGTTGVIR	1;0	1	1	67107;101240	-	hypothetical protein THAOC_11178 [Thalassiosira oceanica]	0.59714	2	0.234677	0.540086	0.659516	2	0.0380962	0.228071	0.584175	2	0.160484	0.449505	0.639433	2	0.0770923	0.309399	0.909666	2	0.70463	0.923726	0.916562	2	0.757124	0.940003	0.93215	2	0.733927	0.934892	0.94778	2	0.844616	0.967117	1.01518	2	0.932107	0.983466	0.945983	2	0.846015
584	EJK64444.1	846	119961	FETIFNNQIR;LAELNEYVK	1;0	1	1	183319;209960;209961;209962;209963	-	hypothetical protein THAOC_14823 [Thalassiosira oceanica]	1.07901	1	0.845215	0.957471	0.991885	1	0.980402	0.994755	0.863524	1	0.770423	0.919862	0.820211	1	0.571743	0.862159	1.25082	1	0.540246	0.843246	1.11724	1	0.792121	0.946727	1.04552	1	0.884512	0.978638	0.931948	1	0.863514	0.969879	0.87377	1	0.578842	0.884074	1.07858	1	0.80042
585	XP_002293757.1	102	113951	VECQILSTLHR;QLTYDANFSLTGFER	1;0	1	2	203233;203235;289162	EED88766.1	stromal processing peptidase, partial [Thalassiosira pseudonana CCMP1335]	1.04032	2	0.887811	0.973136	0.804684	2	0.262974	0.639512	1.27034	2	0.466053	0.759604	0.951453	2	0.842816	0.950409	0.734775	2	0.216478	0.564116	0.476201	2	0.0154985	0.106478	0.908451	2	0.643436	0.908327	0.590212	2	0.0616938	0.286208	1.19509	2	0.329767	0.727373	1.30778	2	0.210879
586	EJK45298.1	535	112232	VLATLEFNR;SIYNNMQAFIR	1;0	1	2	114672;114681;207391	-	hypothetical protein THAOC_36093 [Thalassiosira oceanica]	0.594074	3	0.0237976	0.126127	0.895084	3	0.590741	0.850931	0.430797	3	0.029697	0.145338	0.664856	3	0.219178	0.579119	1.27872	3	0.189581	0.527987	1.07038	3	0.634737	0.896678	0.992876	3	0.986501	0.995349	0.814244	3	0.410859	0.786751	0.814873	3	0.426057	0.793261	0.69938	3	0.0137986
587	EJK77855.1	557	111264	GIIAAIWGSDEIR;YGVELTFFHGK	1;0	1	4	214375;214380;214381;214392;259935;259947	-	hypothetical protein THAOC_00276 [Thalassiosira oceanica]	0.963821	6	0.767623	0.920943	1.19644	6	0.138386	0.482693	1.01122	6	0.928107	0.964488	1.27871	6	0.0524948	0.247456	0.971652	6	0.760424	0.942616	0.770483	5	0.0180982	0.119767	1.04432	6	0.648335	0.908881	0.910775	6	0.294471	0.675219	1.05925	6	0.244376	0.642119	0.819678	6	0.10399
588	EJK50574.1	32	108113	SALESLVR;TYVGAMPGK	1;0	1	1	62868;171203	-	hypothetical protein THAOC_30393 [Thalassiosira oceanica]	0.745069	1	0.485151	0.777796	1.12557	1	0.677732	0.885656	0.490608	1	0.19558	0.500341	0.754066	1	0.433557	0.779054	1.15794	1	0.690431	0.916788	0.929946	1	0.864414	0.971791	0.806678	1	0.481152	0.845301	0.650005	1	0.30207	0.68739	0.698761	1	0.158484	0.541654	0.679575	1	0.227677
589	EJK45269.1	1274	101867	CVIEYVFDGSR;KIDYGEAPK	1;0	1	1	200230;265318;265319	-	hypothetical protein THAOC_36119 [Thalassiosira oceanica]	1.26862	1	0.569643	0.83252	1.48011	1	0.187881	0.558327	0.506733	1	0.216478	0.524029	0.643818	1	0.251475	0.610725	1.73768	1	0.157184	0.48399	1.42578	1	0.40466	0.773617	0.765239	1	0.383962	0.77568	0.609083	1	0.244876	0.625148	0.481412	1	0.0187981	0.1849	0.846374	1	0.579442
590	EED89061.1	357	101271	VILENSAVR;LFMSDDASLR	1;0	1	2	10974;96767;142919	XP_002293325.1	coatomer protein subunit gamma [Thalassiosira pseudonana CCMP1335]	0.480261	2	0.0175982	0.101641	0.764419	2	0.165083	0.531215	0.463509	2	0.0350965	0.164606	0.736301	2	0.211779	0.56621	1.1122	2	0.671233	0.912715	0.75503	2	0.313869	0.696848	1.12242	2	0.582942	0.889987	0.769185	2	0.325567	0.715753	0.998594	2	0.994401	0.9985	0.660916	2	0.0609939
591	XP_002286539.1	430	82040.5	VDATITYR;GSCVFAQTSVMR	1;0	1	1	79173;203829	EED96180.1	predicted protein [Thalassiosira pseudonana CCMP1335]	0.664164	1	0.346565	0.665081	0.897036	1	0.70053	0.89478	0.632717	1	0.374563	0.692595	0.857871	1	0.663334	0.891539	0.952319	1	0.889211	0.978479	1.09603	1	0.827817	0.957245	0.949028	1	0.864614	0.975277	1.10576	1	0.80222	0.953762	0.986842	1	0.955504	0.985468	0.770386	1	0.394961
592	EJK45639.1	896	73805.8	ICMANAIR;VLDGGILVLCGVSGVQSQSLTVDR	1;0	1	1	81690;354334;354337	-	hypothetical protein THAOC_35738 [Thalassiosira oceanica]	0.889657	1	0.770823	0.922805	0.907891	1	0.729827	0.902269	0.847261	1	0.740826	0.908874	0.86674	1	0.684932	0.894917	0.955324	1	0.89531	0.979117	0.818317	1	0.636036	0.896678	0.942649	1	0.843616	0.965358	0.809391	1	0.59994	0.890133	0.986287	1	0.954505	0.985468	1.00852	1	0.977502
593	XP_002292109.1	656	68362.5	FELFVCGR;ELANAYTELNNPVVQYQR	1;0	1	1	104505;333296;333297;333298	EED90960.1	lysyl-trna synthetase [Thalassiosira pseudonana CCMP1335]	0.696975	1	0.39936	0.713057	0.922509	1	0.770523	0.913546	0.806652	1	0.666733	0.88153	1.06523	1	0.859114	0.953976	0.667037	1	0.281972	0.64951	0.597367	1	0.242776	0.616864	0.799263	1	0.461654	0.831989	0.721088	1	0.419358	0.793394	1.1672	1	0.527847	0.86667	0.789367	1	0.441656
594	EJK58002.1	821	61377.7	ILIAAHGNTLR;HYGGLQGLNK	1;0	1	1	150825;211958	-	hypothetical protein THAOC_21902 [Thalassiosira oceanica]	1.75854	1	0.211379	0.506522	1.51141	1	0.168383	0.534202	1.29594	1	0.60214	0.845908	1.14584	1	0.69793	0.90285	1.23792	1	0.560544	0.853146	1.15776	1	0.728727	0.934931	0.958516	1	0.889711	0.979498	0.902959	1	0.79932	0.952951	0.775887	1	0.30257	0.703651	1.14253	1	0.657034
595	EJK74831.1	1212	60858	DFVFDLHDASR;KIPGSEQFNK	1;0	1	1	194332;288399	-	hypothetical protein THAOC_03470 [Thalassiosira oceanica]	1.10077	2	0.723528	0.901779	1.13441	2	0.510149	0.798932	1.10395	2	0.767823	0.919862	1.15152	2	0.562544	0.852568	0.676138	2	0.121988	0.429192	0.681311	2	0.170683	0.519307	0.706737	2	0.115688	0.475432	0.715781	2	0.214179	0.584942	1.02888	2	0.870313	0.969441	0.975144	2	0.905509
596	EED88489.1	225	60652.5	GSLEFPTVFK;SGVVILPAMYVNR	1;0	1	2	221259;221267;222705	XP_002294134.1	predicted protein [Thalassiosira pseudonana CCMP1335]	1.0053	2	0.984102	0.993474	0.77777	2	0.193781	0.565952	1.21213	2	0.553345	0.825276	0.927851	2	0.765523	0.922936	1.21509	2	0.433857	0.781166	1.02459	2	0.930207	0.980523	1.51029	2	0.0630937	0.336999	1.30351	2	0.320468	0.707782	1.21307	2	0.259674	0.661122	1.31628	2	0.19848
597	EJK46725.1	881	59914.8	DTISVTGNVLR;DYLTDLFPILELGTSAK	1;0	1	1	149548;339195;339196;339197	-	hypothetical protein THAOC_34595 [Thalassiosira oceanica]	0.836695	1	0.666433	0.875488	1.04147	1	0.885111	0.957156	0.958687	1	0.933707	0.967099	1.19916	1	0.60284	0.871023	1.08118	1	0.825617	0.955132	1.01905	1	0.969003	0.990309	1.29286	1	0.40266	0.788399	1.23753	1	0.59634	0.89006	1.17329	1	0.518248	0.861993	0.823016	1	0.526347
598	EJK43726.1	224	58795.8	GGCTFVQK;SGVVILPAMYVNR	1;0	1	1	157680;222705	-	hypothetical protein THAOC_37793 [Thalassiosira oceanica]	1.11702	1	0.782122	0.930901	0.614043	1	0.110489	0.429337	1.38754	1	0.514249	0.792268	0.754201	1	0.434057	0.779054	0.734016	1	0.406159	0.760623	0.665265	1	0.343666	0.724354	0.94999	1	0.866913	0.975277	0.871762	1	0.731027	0.936649	1.26429	1	0.339566	0.731498	1.85315	1	0.0834917
599	EED92942.1	157	58578.3	NMNQNVAVLLDTK;NMNLPGVVVDLPTLTEK	1;0	1	1	292148;335153	XP_002289405.1	pyruvate kinase [Thalassiosira pseudonana CCMP1335]	1.20832	1	0.649235	0.869388	1.60172	1	0.122688	0.449723	0.760931	1	0.587341	0.839573	1.09725	1	0.789921	0.93279	1.60225	1	0.217878	0.56642	1.36399	1	0.463354	0.815801	1.07332	1	0.815118	0.958226	0.912427	1	0.818718	0.959865	0.702038	1	0.163884	0.552417	0.738704	1	0.327467
600	EJK69095.1	1238	57724.5	ILYPTLSDYDIR;TPSLIFEHVNNTDFK	1;0	1	1	230785;328231	-	hypothetical protein THAOC_09683, partial [Thalassiosira oceanica]	0.673486	1	0.361364	0.679017	0.686285	1	0.20268	0.576469	0.471344	1	0.177782	0.470861	0.481619	1	0.0889911	0.332385	1.22249	1	0.579942	0.868282	0.803955	1	0.60424	0.887862	0.908971	1	0.751825	0.941088	0.592884	1	0.221478	0.59263	0.762524	1	0.274473	0.676841	1.03146	1	0.916208
601	XP_002289319.1	697	57601.7	GMGSIEAMSK;VAQGVSGAVQDK	1;0	1	1	192523;229276;229278	EED92856.1	predicted protein [Thalassiosira pseudonana CCMP1335]	1.86518	1	0.175882	0.46	1.60875	1	0.119088	0.447077	2.03589	1	0.19778	0.504536	1.80663	1	0.147185	0.453222	0.767772	1	0.465653	0.80087	0.588343	1	0.230777	0.600547	0.869822	1	0.646435	0.908327	0.672243	1	0.336866	0.725089	1.11141	1	0.661434	0.911202	1.11951	1	0.705929
602	EJK49539.1	1011	57422.6	LLITHLASR;NIFMLEGDDAVWHLMR	1;0	1	1	103494;315337	-	hypothetical protein THAOC_31577 [Thalassiosira oceanica]	1.33443	2	0.289671	0.609798	1.29438	2	0.181482	0.549299	1.09049	2	0.79712	0.925473	1.09301	2	0.719628	0.905182	1.10295	2	0.693631	0.917531	1.232	2	0.456054	0.811164	0.944079	2	0.780722	0.954687	1.06402	2	0.819118	0.959865	0.860673	2	0.382262	0.767883	1.01366	2	0.949905
603	EJK57783.1	1394	57368.5	VNKDPESLLR;GGEATVLPFSSYGAMGWAR	1;0	1	2	232217;232222;316476	-	hypothetical protein THAOC_22142 [Thalassiosira oceanica]	2.01624	3	0.0235976	0.125808	1.34717	3	0.113089	0.43544	1.55503	3	0.0371963	0.170459	1.05034	3	0.707829	0.903334	1.36124	3	0.050395	0.249067	1.41386	3	0.0526947	0.254975	1.0974	3	0.437356	0.808441	1.15522	3	0.315468	0.703445	0.802067	3	0.0451955	0.297992	1.48244	3	0.00809919
604	EJK68253.1	890	56792.7	YEHPLVQR;NQIGSSAMAYK	1;0	1	1	200620;231942	-	hypothetical protein THAOC_10587 [Thalassiosira oceanica]	1.09039	1	0.828417	0.952965	0.800385	1	0.431357	0.738849	1.24088	1	0.678332	0.888771	0.866317	1	0.684632	0.894917	0.643001	1	0.243976	0.600098	0.530171	1	0.155284	0.497108	0.732182	1	0.314669	0.724531	0.59533	1	0.225277	0.596323	1.10635	1	0.674533	0.911936	1.35446	1	0.325967
605	EJK72886.1	101	55744.8	LGITGTESVLQIVR;QLTYDANFSLTGFER	1;0	1	4	234881;234882;234883;234886;289162	-	hypothetical protein THAOC_05536, partial [Thalassiosira oceanica]	0.947624	4	0.580342	0.837291	1.05979	3	0.556844	0.828124	0.997344	4	0.983302	0.992672	1.031	4	0.861414	0.954654	1.13608	4	0.371163	0.739449	1.12412	4	0.289871	0.669792	1.12594	3	0.322868	0.728242	1.2397	4	0.0878912	0.35712	1.06257	4	0.661634	0.911202	0.989885	4	0.929007
606	ADB27540.1	793	54892.7	IGEEQIFYFLQR;GQGGVYNFVTK	1;0	1	2	76025;247823;231983;231984	YP_004072586.1	FeS cluster assembly protein SufB (chloroplast) [Thalassiosira oceanica CCMP1005]	1.5176	2	0.241576	0.549646	1.07942	2	0.691331	0.891379	1.17186	2	0.642536	0.870735	0.862022	2	0.60434	0.871023	1.02316	2	0.925407	0.985949	1.22118	2	0.475552	0.826147	0.818253	2	0.347465	0.741202	0.980694	2	0.941806	0.987969	0.820682	2	0.271173	0.672329	1.33013	2	0.334667
607	EED95898.1	400	53304.5	KIEDVSK;GWDEGFASMK	1;0	1	1	220868;221805;221807	XP_002286257.1	predicted protein [Thalassiosira pseudonana CCMP1335]	0.864835	1	0.721128	0.901779	0.588261	1	0.089991	0.385187	0.92776	1	0.876412	0.94971	0.622643	1	0.223378	0.583831	0.982418	1	0.961004	0.990535	0.596771	1	0.240776	0.614747	1.09846	1	0.755024	0.942068	0.673856	1	0.340766	0.728255	1.09913	1	0.690931	0.918506	1.51523	1	0.20118
608	EJK77600.1	116	53217.4	GLMNFPTR;SYAFLSGPSFAR	1;0	1	1	78326;189409;189416	-	hypothetical protein THAOC_00555 [Thalassiosira oceanica]	1.38938	1	0.437656	0.740523	1.38242	1	0.261374	0.638561	1.30595	1	0.592341	0.840808	1.33593	1	0.421858	0.764732	1.95682	1	0.0949905	0.365927	1.39919	1	0.428857	0.790925	1.90176	1	0.0708929	0.360472	1.39333	1	0.413759	0.790588	0.971318	1	0.905009	0.977215	0.991028	1	0.976502
609	EJK64133.1	994	52114.6	IDAVISCLASR;IINLGGPDEPLTMK	1;0	1	1	158891;295828	-	hypothetical protein THAOC_15156, partial [Thalassiosira oceanica]	0.919429	2	0.756824	0.91516	1.13716	2	0.505349	0.79671	0.903504	2	0.767423	0.919862	1.16536	2	0.531947	0.837177	1.05041	2	0.839916	0.961765	1.21894	2	0.479652	0.82937	1.04872	2	0.818118	0.958226	1.23296	2	0.468153	0.822123	1.00772	2	0.965703	0.98893	0.825224	2	0.368763
610	XP_002296513.1	895	49571.1	EDPLLALAFK;VLDGGILVLCGVSGVQSQSLTVDR	1;0	1	1	219407;354334;354337	EED87209.1	predicted protein, partial [Thalassiosira pseudonana CCMP1335]	0.567989	1	0.210579	0.505757	0.828588	1	0.511749	0.79946	0.980292	1	0.971003	0.985131	1.31779	1	0.442156	0.78654	0.610483	1	0.19538	0.537446	0.609628	1	0.260474	0.640232	1.00002	1	0.9995	0.9995	1.03756	1	0.926907	0.982587	1.47662	1	0.131087	0.493922	0.784394	1	0.426357
611	XP_002292359.1	1336	46415.4	NFDFFEMR;GIGPAYASK	1;0	1	3	127611;132548;132551;147367;147371;147380;147381	EED90334.1	adenosuccinate synthase [Thalassiosira pseudonana CCMP1335]	0.67447	3	0.0255974	0.132548	0.907719	3	0.546545	0.824766	0.542383	3	0.0278972	0.139564	0.739685	3	0.30387	0.667398	1.09482	3	0.643836	0.90642	1.0961	3	0.824418	0.955539	0.926632	3	0.762624	0.945401	0.938699	3	0.910309	0.976494	0.845981	3	0.146685	0.52483	0.768879	3	0.0472953
612	EJK49243.1	276	45742.4	AVTDAMYR;RPSSNADPYLVTGK	1;0	1	5	75725;75727;75728;75759;167055;297010;297013;297014;297015;297016;297017	-	hypothetical protein THAOC_31900 [Thalassiosira oceanica]	0.925147	5	0.579442	0.837291	0.774239	4	0.0133987	0.113354	1.05479	5	0.648235	0.875029	0.951852	5	0.612139	0.876151	0.55507	3	0.00209979	0.0279816	0.571186	4	0.00079992	0.0128559	0.678887	4	0.00179982	0.0267742	0.649907	5	0.00089991	0.015427	1.17376	5	0.0217978	0.205292	1.05084	4	0.565943
613	EJK45170.1	909	43897.4	DLLSLDYIR;DIEVAYLFLR	1;0	1	1	128407;169596	-	hypothetical protein THAOC_36229 [Thalassiosira oceanica]	1.26194	2	0.390561	0.70716	0.806803	2	0.262474	0.639159	1.58489	2	0.172883	0.466063	0.976239	2	0.923408	0.97334	1.06965	2	0.785621	0.947965	1.09585	2	0.745625	0.940003	1.34986	2	0.167383	0.549799	1.42526	2	0.192481	0.551678	1.22372	2	0.239676	0.639136	1.55916	2	0.0462954
614	EJK68381.1	709	42638.5	GSGYGPPLENISEAVGNTPMVK;GYPCVITMAEPFSVER	1;0	1	9	128790;356195;356197;356199;356201;356202;356203;356204;356210;304217;304219;304220;304221;304225;306296;306299;306304;336360;336361;336362	-	hypothetical protein THAOC_10442 [Thalassiosira oceanica]	1.7211	9	0.00019998	0.00367718	0.833604	8	0.00039996	0.0105989	1.83105	9	0.00029997	0.00478094	0.900565	9	0.226977	0.587595	0.991663	8	0.856314	0.968874	1.189	7	0.0147985	0.102451	1.05787	9	0.545245	0.871938	1.3391	9	0.0154985	0.112944	1.02704	8	0.605139	0.893901	1.94748	9	0.0001
615	EJK59308.1	75	42212.3	MLIATDVAAR;MLDMGFEPQIR	1;0	1	2	118833;118877;198164;198167;198168;202223;202224;202225;202227;202229;202241;206287	-	hypothetical protein THAOC_20495 [Thalassiosira oceanica]	0.937671	2	0.812219	0.945781	0.838312	2	0.360364	0.694276	0.910378	2	0.781522	0.921018	0.812628	2	0.391361	0.734603	1.10304	2	0.693431	0.917531	0.913075	2	0.747525	0.940003	1.11258	2	0.608539	0.902727	0.929646	2	0.786621	0.9518	1.00768	2	0.966003	0.98893	1.13925	2	0.540446
616	EJK59460.1	1219	40503.3	QIDVCALGPLR;ELVAIGATAIVVCR	1;0	1	1	170537;231512	-	hypothetical protein THAOC_20317 [Thalassiosira oceanica]	1.86522	1	0.175782	0.46	1.40996	1	0.238376	0.612773	1.56867	1	0.380962	0.696561	1.19878	1	0.60484	0.871023	1.31385	1	0.452955	0.791062	1.42686	1	0.40366	0.773617	1.15921	1	0.624038	0.902934	1.27516	1	0.548845	0.869359	0.871864	1	0.573043	0.88387	1.32759	1	0.356364
617	XP_002291391.1	1614	38506	AVGVLLGSSSR;DINDPTVSTVANLVK	1;0	1	4	14146;109897;109899;109900;308495	EED91498.1	26S proteasome regulatory subunit 8 [Thalassiosira pseudonana CCMP1335]	1.31655	4	0.110689	0.34932	1.06083	3	0.550045	0.826673	1.04654	4	0.89881	0.956253	0.850619	4	0.477852	0.798785	1.1853	3	0.220978	0.572891	1.12028	4	0.321368	0.704582	1.04905	4	0.839516	0.963116	0.943489	4	0.607839	0.895344	0.840454	4	0.343966	0.733576	1.22988	4	0.112889
618	EJK70352.1	1613	38438.9	ESIPTTAYR;DINDPTVSTVANLVK	1;0	1	1	107406;308495	-	hypothetical protein THAOC_08295 [Thalassiosira oceanica]	0.865685	1	0.722428	0.901779	0.761198	1	0.331167	0.685302	0.781581	1	0.619338	0.856842	0.685187	1	0.310369	0.673026	0.916051	1	0.808019	0.95334	0.81057	1	0.616338	0.892525	0.866623	1	0.634337	0.905881	0.771386	1	0.521648	0.85283	0.939544	1	0.79502	0.945559	1.17067	1	0.60014
619	EJK44401.1	153	36902.7	GEAMQAASDAIDTGMVSVIGLSK;LDSTVVSQPAIFVASMAAVEK	1;0	1	6	264237;358000;358001;358002;358003;358567;354053;354054;354693	-	hypothetical protein THAOC_37058 [Thalassiosira oceanica]	1.32782	8	0.00019998	0.00367718	1.09698	9	0.040096	0.235352	1.3745	9	0.0222978	0.121324	1.19235	9	0.089691	0.333932	1.34668	9	0.00519948	0.0508362	1.67725	8	0.0001	0.00239976	1.48423	9	0.00269973	0.037965	1.7765	9	0.00329967	0.0373548	1.08938	9	0.309069	0.710734	1.14831	9	0.00359964
620	EJK74458.1	962	34930.3	YNANELLTK;ILPSLMNECAK	1;0	1	5	206721;206728;206729;206731;274019;255480;255488	-	hypothetical protein THAOC_03860 [Thalassiosira oceanica]	0.559484	5	0.00079992	0.0106775	0.564537	3	0.00069993	0.014666	0.441797	5	0.00049995	0.00714611	0.451939	5	0.00019998	0.00462005	1.01667	5	0.819218	0.954516	0.922392	5	0.342066	0.723523	0.846329	5	0.0946905	0.426557	0.770595	5	0.0242976	0.15789	0.767845	4	0.00559944	0.0861452	1.0201	5	0.770823
621	EJK45982.1	655	33712.8	MLVVGGLDR;ELANAYTELNNPVVQYQR	1;0	1	1	84982;333296;333297;333298	-	hypothetical protein THAOC_35377 [Thalassiosira oceanica]	0.747937	1	0.491051	0.782799	0.788043	1	0.39606	0.718198	0.875274	1	0.783222	0.921018	0.917706	1	0.805919	0.936576	0.621567	1	0.215178	0.564116	0.480817	1	0.109289	0.407288	0.759133	1	0.368463	0.757116	0.59236	1	0.220478	0.591446	1.19365	1	0.472253	0.830024	0.980025	1	0.945805
622	EJK45556.1	1228	33519.8	VATPEIAQSVHETCR;VAIAYEPVWAIGTGK	1;0	1	1	278391;307306;307307	-	hypothetical protein THAOC_35826 [Thalassiosira oceanica]	1.36695	3	0.159184	0.43928	1.19611	3	0.280472	0.655144	1.44338	3	0.0664934	0.251058	1.27951	3	0.0845915	0.323335	0.947291	3	0.668533	0.912715	0.858988	3	0.445955	0.808201	1.03877	3	0.747225	0.937788	0.953351	3	0.731127	0.936649	1.08021	3	0.611439	0.895374	1.13671	3	0.281672
623	EED92224.1	1218	30052.3	MNNALIQSK;ELVAIGATAIVVCR	1;0	1	1	194765;231512	XP_002290472.1	hypothetical protein THAPSDRAFT_262674 [Thalassiosira pseudonana CCMP1335]	1.90225	1	0.167383	0.450859	1.28852	1	0.366663	0.698657	1.31312	1	0.584442	0.837997	0.905431	1	0.775322	0.925866	1.48196	1	0.29767	0.669386	1.54269	1	0.313969	0.696848	1.07557	1	0.809119	0.955652	1.13147	1	0.757124	0.942478	0.727653	1	0.205379	0.611939	1.45714	1	0.236476
624	EED95523.1	1398	29529.5	KVPVAVTHDGR;ECLPVAIILR	1;0	1	3	13541;234181;234182;152391;152392;152393;152394	XP_002288080.1	RS4, ribosomal protein 4 [Thalassiosira pseudonana CCMP1335]	0.694394	3	0.0938906	0.315655	0.781292	3	0.0484952	0.266428	0.890646	3	0.557244	0.82805	0.871884	3	0.290671	0.656829	0.764799	3	0.0785921	0.335099	0.639709	3	0.050095	0.245698	0.902701	3	0.392061	0.782375	0.701962	3	0.0405959	0.217478	1.12876	3	0.220278	0.623015	1.04475	3	0.708529
625	EJK75419.1	1540	29379.6	IVGTPNQDNPLMK;RPEYVSNWWNVVNWDK	1;0	1	6	284334;284348;284354;284359;286953;286958;350819;350823;350824;350825	-	hypothetical protein THAOC_02860 [Thalassiosira oceanica]	1.42316	9	0.00019998	0.00367718	1.02119	10	0.807019	0.926863	1.4798	10	0.00209979	0.021734	1.12068	10	0.364464	0.710014	0.767478	10	0.0653935	0.301648	1.34577	10	0.0224978	0.138211	0.869907	10	0.380162	0.773414	1.55345	10	0.00659934	0.0638646	1.11331	10	0.0742926	0.389874	1.24243	9	0.00279972
626	XP_002292458.1	484	28513.5	FDCGGAAAVLGAAR;GLLFDTGGYNIK	1;0	1	2	197907;197908;259970;259977;259978;259979;259980;259981;310498	EED90433.1	predicted protein [Thalassiosira pseudonana CCMP1335]	0.651916	2	0.129687	0.386572	0.933254	2	0.720128	0.902269	0.80056	2	0.491151	0.778771	1.14665	2	0.573943	0.862385	0.954856	2	0.849415	0.964708	0.959985	2	0.885211	0.974912	1.21995	2	0.353565	0.748624	1.24748	2	0.409459	0.784906	1.24922	2	0.194781	0.59324	0.723569	2	0.131587
627	ADB27541.1	139	28173.9	LVDMSSVFLSR;GEIHAIMGPNGSGK	1;0	1	2	174500;179718;273502	YP_004072587.1	FeS cluster assembly protein SufC (chloroplast) [Thalassiosira oceanica CCMP1005]	1.28668	2	0.355164	0.67379	1.05466	2	0.780022	0.913546	0.90588	2	0.769623	0.919862	0.762407	2	0.466053	0.793788	2.4215	2	0.0483952	0.242341	2.32614	2	0.00679932	0.0615014	1.77362	2	0.0132987	0.116769	1.77336	2	0.0441956	0.232455	0.765474	2	0.123488	0.482164	1.20831	2	0.374863
628	EJK65865.1	180	25191.1	QMVNFILQEAHEK;VKTEHDFNLEK	1;0	1	2	308580;308586;317838	-	hypothetical protein THAOC_13235 [Thalassiosira oceanica]	1.06463	3	0.642636	0.869145	1.38885	3	0.0133987	0.113354	1.37866	3	0.0926907	0.313201	1.84846	3	0.00109989	0.0154844	0.809606	3	0.143986	0.466721	0.876351	3	0.368863	0.752782	1.07716	3	0.531247	0.868524	1.18859	3	0.242376	0.624144	1.28968	3	0.0256974	0.220264	0.766617	3	0.059594
629	EJK55457.1	64	24563.2	TCTLYYGVR;NSGALLCGVK	1;0	1	1	135965;194767	-	hypothetical protein THAOC_24814, partial [Thalassiosira oceanica]	1.30577	2	0.325167	0.643903	1.58227	2	0.0238976	0.162504	1.14354	2	0.687131	0.892178	1.42928	2	0.148485	0.455827	1.01394	2	0.955804	0.990535	1.30748	2	0.335666	0.716307	0.930169	2	0.726227	0.934424	1.21442	2	0.470353	0.823999	0.910676	2	0.588841	0.888444	0.822766	2	0.361664
630	AIR75492.1	455	24161	LASISNIHINR;EANTIYGVLGVK	1;0	1	6	169326;169331;169335;169339;169341;169357;253148;253149	-	ribosomal protein S3 (chloroplast) [Cyclotella sp. L04_2]	0.935599	6	0.410859	0.720903	0.998475	6	0.987001	0.996401	1.07272	6	0.678132	0.888771	1.14423	6	0.370963	0.717059	0.825606	4	0.0832917	0.342515	0.57162	6	0.0001	0.00239976	0.903484	6	0.534147	0.87013	0.660698	6	0.0141986	0.106047	1.14671	6	0.268173	0.6679	0.955358	6	0.744426
631	AIR75633.1	454	24119	TLAANIK;EANTIYGVLGVK	1;0	1	1	106713;253148;253149	-	ribosomal protein S3 (chloroplast) [Cyclotella sp. WC03_2]	0.429719	1	0.0861914	0.298113	0.906083	1	0.725227	0.902269	0.515622	1	0.221278	0.527145	1.08933	1	0.807219	0.936576	0.305545	1	0.0127987	0.0974991	0.414767	1	0.0644936	0.292414	0.384442	1	0.0214978	0.164664	0.526524	1	0.143386	0.463365	1.23022	1	0.39916	0.778169	0.491409	1	0.0537946
632	EJK60670.1	402	24034.1	FVSLISSTPSVR;TLQESVASELAAR	1;0	1	6	186812;186813;186827;186828;186829;186833;207984;207985;207987;207990;207991;207992	EJK68017.1	hypothetical protein THAOC_18936, partial [Thalassiosira oceanica]	0.521914	5	0.0001	0.00219734	0.723913	6	0.00269973	0.0377125	0.434882	5	0.0001	0.00211861	0.597154	6	0.00149985	0.019728	1.36555	6	0.0452955	0.234832	2.11779	6	0.00949905	0.0773678	1.18111	6	0.254475	0.677315	1.88045	6	0.0165983	0.11856	0.86868	6	0.0358964	0.256101	0.804536	5	0.0123988
633	EJK76287.1	679	22771.4	SAESLAANVAR;GFTLEELK	1;0	1	5	122333;122334;122343;122345;122355;170278;170279;170280	-	hypothetical protein THAOC_01961 [Thalassiosira oceanica]	0.327249	8	0.00019998	0.00367718	0.553923	8	0.00209979	0.0329028	0.211609	8	0.00019998	0.00360164	0.359301	8	0.00179982	0.0222142	0.881424	8	0.239376	0.595626	0.794856	7	0.00389961	0.0408099	0.608906	8	0.0257974	0.182099	0.580735	8	0.00329967	0.0373548	0.707146	8	0.0270973	0.226861	0.626774	8	0.00019998
634	sp|A0T0P3.1|ATPD_THAPS	148	21045.5	FLMVLVK;NQLENLAK	1;0	1	1	148073;168086;168087;168090;168091	YP_009093422.1;ABK20728.1;AIR75544.1;YP_874505.1;EED86187.1;AIR75403.1;YP_004072592.1;AIR76095.1;XP_002297547.1;ADB27546.1	RecName: Full=ATP synthase subunit delta, chloroplastic; AltName: Full=ATP synthase F(1) sector subunit delta; AltName: Full=F-type ATPase subunit delta	0.930405	1	0.853215	0.959809	1.00844	1	0.980002	0.994755	0.689851	1	0.485651	0.775406	0.792953	1	0.512349	0.824333	1.24065	1	0.557244	0.852451	1.4075	1	0.424158	0.787282	0.977275	1	0.941106	0.988536	1.10903	1	0.79662	0.952951	0.845037	1	0.49595	0.847486	0.938809	1	0.833217
635	AAB70106.1	187	20198.4	ISQLAFLGQITTR;AAMMGILGLMVHEQL	1;0	1	14	225832;225838;225839;225840;225842;225843;225845;225846;225847;225848;225849;225850;225851;225852;265428	AAB80924.1	fucoxanthin-chlorophyll a/c light-harvesting protein, partial [Skeletonema costatum]	0.837991	13	0.00609939	0.0457963	0.982924	15	0.830917	0.93742	0.485333	15	0.00139986	0.0154672	0.506349	15	0.00119988	0.0167611	2.32551	15	0.0001	0.0035271	2.37749	15	0.0001	0.00239976	1.1258	14	0.137286	0.52104	1.07569	13	0.236176	0.616112	0.545336	15	0.00029997	0.0105872	0.970805	14	0.589941
636	EJK67319.1	941	19020.9	IQGVLDYIDR;VGAGIDNVAGVK	1;0	1	2	154740;154741;215149;215152	-	hypothetical protein THAOC_11662, partial [Thalassiosira oceanica]	1.3998	2	0.218678	0.513765	1.26196	2	0.226177	0.600253	1.25946	2	0.477952	0.768564	1.16445	2	0.533947	0.837691	1.4695	2	0.127687	0.437394	1.41976	2	0.208579	0.57479	1.37308	2	0.145585	0.523162	1.35347	2	0.255874	0.634399	0.935216	2	0.70023	0.921997	1.0887	2	0.694231
637	EJK66258.1	592	18388.3	FADENFQLK;GKPLHYK	1;0	1	2	218104;218117;226595	-	hypothetical protein THAOC_12839 [Thalassiosira oceanica]	0.982705	3	0.933207	0.984222	1.03528	3	0.780022	0.913546	0.999741	3	0.9997	0.9997	1.07809	3	0.810619	0.936624	0.73553	3	0.325867	0.700638	0.60943	3	0.215678	0.581169	0.779576	3	0.0733927	0.367985	0.650177	3	0.0594941	0.279347	1.03085	3	0.859414	0.966982	0.950357	3	0.664534
638	XP_002295246.1	1216	16853.1	GLIGEIIK;TYIMIKPDGVQR	1;0	1	2	140687;140690;283360;283361;283362;285938	EED87550.1	probable nucleoside disphosphate kinase [Thalassiosira pseudonana CCMP1335]	2.79119	2	0.00209979	0.0226576	1.08023	2	0.685731	0.888984	3.16383	2	0.00429957	0.0365261	1.22793	2	0.39646	0.741101	0.910201	2	0.706529	0.923726	0.765033	2	0.336266	0.716307	1.07969	2	0.711729	0.930448	0.918292	2	0.753725	0.94176	1.16608	2	0.371463	0.761084	2.57299	2	0.00079992
639	AIR75420.1	700	13482.2	ITQIVEELK;KQIEDAGGK	1;0	1	5	208580;208588;208590;208591;208592;250317;250318;250322	AIR75561.1	ribosomal protein L12 (chloroplast) [Cyclotella sp. L04_2]	1.85122	5	0.00619938	0.0463539	2.27124	5	0.0001	0.00353298	2.20571	5	0.00239976	0.0240109	3.00554	5	0.0001	0.00261133	0.249524	4	0.0001	0.0035271	0.458881	4	0.00019998	0.0040905	0.350555	5	0.0001	0.0036731	0.613241	5	0.00019998	0.00473637	1.2667	3	0.0349965	0.256101	0.685833	4	0.00189981
640	YP_009093163.1	701	13460.1	MVQEALSK;KQIEDAGGK	1;0	1	13	160630;160631;160632;160635;160644;160646;160655;160656;160657;160659;160666;165610;165615;250317;250318;250322	AIR75836.1	ribosomal protein L12 (chloroplast) [Roundia cardiophora]	1.30607	13	0.00029997	0.00505183	1.1794	13	0.00449955	0.0551577	1.41063	10	0.0001	0.00211861	1.27523	12	0.0001	0.00261133	0.368353	11	0.0001	0.0035271	0.564865	11	0.0001	0.00239976	0.400828	11	0.0001	0.0036731	0.59745	10	0.0001	0.00260844	1.06819	11	0.0136986	0.150883	1.14201	12	0.00039996
641	AAD12750.1	47	8884.58	ALSLATPR;SADIYPR	1;0	1	1	52268;133926	sp|O98448.1|CY550_THAWE	cytochrome c-550, partial (chloroplast) [Thalassiosira weissflogii]	0.950726	1	0.89891	0.97661	1.90754	1	0.0476952	0.264452	1.49566	1	0.428157	0.732995	3.07032	1	0.0276972	0.161001	1.37508	1	0.39516	0.755466	1.77777	1	0.193181	0.548746	2.24847	1	0.0370963	0.229462	2.97857	1	0.0268973	0.168694	1.59536	1	0.0813919	0.408959	0.505282	1	0.0628937
642	EED92067.1	268	22681.4	LQIWDTAGQER;QWLHEIDR;YACENVNK;LLLIGDSGVGK;TSTNVEQAFLTMASQIK;FADDTYTESYISTIGVDFK;GAHGIIVVYDVTDNESFNNVK;VVSTEQGKEFADGLGIEFLETSAK	0;1;1;1;1;1;1;1	7	31	41866;192953;192955;192956;192958;192959;192961;192963;192964;192965;192966;192970;192971;192972;124680;124709;124710;124712;124713;189117;260743;260746;260753;208302;208303;208314;208315;208318;337345;337358;338430;338431;338432;338433;354421;354422;354424;354426;354427;358779;358780;358781;367571;367573;367575	XP_002290315.1	ypt1-like rab-type small G protein [Thalassiosira pseudonana CCMP1335]	1.14359	31	0.00729927	0.0515815	0.972256	31	0.456554	0.757561	1.42399	30	0.0001	0.00211861	1.17525	31	0.00079992	0.0127562	0.806605	31	0.00039996	0.00827044	0.673504	30	0.0001	0.00239976	0.969566	29	0.275172	0.695661	0.859281	30	0.0001	0.00260844	1.21487	31	0.00019998	0.0079992	1.15801	30	0.00029997
643	XP_002288891.1	267	20521.5	LQIWDTAGQER;LLMIGDSGVGK;TITTSYFR;GAQGILLVYDVTDR;NDINVEQSFLGIAR;GAQGILLVYDVTDRR;NWISQIQQHADVHVNK;YANDSFSPTFITTIGIDFK	0;1;1;1;1;1;1;1	7	15	41866;192953;192955;192956;192958;192959;192961;192963;192964;192965;192966;192970;192971;192972;54617;212771;216687;93151;93152;242633;242634;299472;254773;254780;254784;274272;274273;340691;352949	XP_002288408.1;EED94327.1;EED93844.1	rab-type small GTPase, partial [Thalassiosira pseudonana CCMP1335]	1.1239	15	0.105389	0.339128	1.09515	15	0.0614939	0.302765	1.2306	14	0.00179982	0.018956	1.23916	13	0.00069993	0.0114661	0.932843	15	0.339466	0.709709	0.88908	15	0.163784	0.510937	0.99828	15	0.979802	0.99436	0.962238	15	0.655334	0.915893	1.05767	15	0.311769	0.712628	1.05173	12	0.147985
644	XP_002295920.1	669	43303.2	TCELLFRNAALAFKGTSFFGKDSHPLTYKGNGENLPGFMIGRKTCELLFRVDVLGLPDGVKFEYDEVYVGTPEERIMKFEYDEVYVGTPEER	0;1;1;1;1;0;1	5	16	286007;286008;286009;286010;286012;304217;304219;304220;304221;304225;306296;306299;306304;336360;336361;336362;337442;337449;337452;338503;338506;338507;338509;338511;338515;338516;338517;338518	XP_002295920.1	silicon transporter [Thalassiosira pseudonana]	0.0002493	3	0.0722927	100	1.00103	2	0.203381	0.998611	0.219655	1	0.20301	0.526889	0.387001	1	0.100523	0.870332	1.93299	1	0.0600059	0.813375	1.38629	1	0.919111	0.883372	1.0105	3	0.97911	0.133867	0.512033	1	0.128583	0.439133	0.760042	1	0.0351155	0.256549	0.799034	1	0.469331
645	ANG60896.1	316	92288.7	VLISDEFDLMPR;DTGLGMTK;SGTTNFMK;EIYVFPGESIK;AQAFAHGVAPGENMMPTGILELNPR	0;1;1;1;1	4	9	60889;222641;222650;222655;226498;226499;134245;134250;154082;256668;256669;256675;256677;359543;359544	-	heat shock protein 90 [Skeletonema marinoi]	0.737806	15	0.00939906	0.0629632	1.05265	15	0.39786	0.718203	0.600419	15	0.00019998	0.00360164	0.881946	15	0.0473953	0.230071	1.02323	15	0.720928	0.931048	1.09146	15	0.142886	0.475405	0.877155	15	0.0367963	0.228391	0.94011	15	0.280772	0.660321	0.86258	15	0.0001	0.0049995	0.728133	15	0.0001
646	AAF81906.1	154	50210.8	FPGQLNCDLR;INVYFNEATGGR;AILMDLEPGTMDSVR;GHYTEGAELIDSVLDVVR;EIVHIQGGQCGNQIGAK	0;1;1;1;1	4	10	163562;163563;163564;163567;163568;163569;163571;199211;199212;268924;268925;268927;268931;318424;344418;344422;332592	sp|Q9LKI8.1|TBB_THAWE;XP_002292479.1;EED90454.1	beta-tubulin [Thalassiosira weissflogii]	1.0563	10	0.667633	0.875488	1.01454	8	0.872113	0.953168	0.950566	10	0.60064	0.845119	1.12007	10	0.334667	0.693981	2.52539	10	0.00019998	0.00553483	1.586	8	0.0001	0.00239976	2.33986	10	0.00019998	0.00571371	1.60134	9	0.00019998	0.00473637	0.884532	9	0.0727927	0.387856	0.876101	10	0.010399
647	XP_002293256.1	216	34051.4	LADFGLAR;APELLLGASR;TDLIGQGAYGTVYR;IPYADSTPEGGVPCNVIR;RIPYADSTPEGGVPCNVIR	0;1;1;1;1	4	6	60043;104328;241265;241280;241281;315153;331476	EED89717.1	cell division control protein 2-like protein, partial [Thalassiosira pseudonana CCMP1335]	0.736232	6	0.0332967	0.161292	1.06705	5	0.279272	0.653803	0.602154	6	0.0438956	0.189583	0.819781	6	0.29977	0.665919	1.30582	6	0.258974	0.618196	1.23183	6	0.143886	0.476423	1.11418	6	0.264774	0.684293	1.06281	6	0.550745	0.870361	0.857732	6	0.357664	0.752977	0.780273	6	0.0285971
648	EED93639.1	487	62800.3	NQVLFER;EPTITPSAIQVQEMGLK;VTPYIVTK;DGGAPFVVDKR;WQEGFWATMK;DTIHIEGIELGYK;VFDDTYKDEFLK;WTDGGFGMAAHNYDGDMLTDQIAQVHR	0;1;1;1;0;0;1;0	4	9	70480;76589;335317;335318;335319;336522;165370;229856;257019;294164;294165;294168;333848;333855;366312	XP_002288203.1	predicted protein [Thalassiosira pseudonana CCMP1335]	1.06364	7	0.242876	0.551907	1.02541	8	0.470953	0.76764	1.19484	8	0.00919908	0.0634772	0.993498	9	0.942406	0.98106	1.11745	9	0.227377	0.576785	0.728281	9	0.0115988	0.0862724	1.02089	8	0.633237	0.905881	0.73375	6	0.00279972	0.0349965	0.964025	9	0.661634	0.911202	1.13514	9	0.258874
649	EED95922.1	1444	120007	LEPAYGADVLR;LWVASVDYAGDVR;GELSGCMIGVK;ATAQWFASVEGFR;KLEPAYGADVLR;SWGVPIPVFYDK	0;1;1;1;0;0	3	6	158588;226510;226511;227467;230943;230959;230960;266820;266825;281048;281049;281050	XP_002286281.1	isoleucine-trna synthetase [Thalassiosira pseudonana CCMP1335]	1.6325	6	0.00269973	0.0267303	0.623106	6	0.377462	0.705205	1.40561	6	0.039596	0.176954	0.539319	6	0.314869	0.67739	1.46719	4	0.00439956	0.0457503	1.26062	6	0.0923908	0.366307	1.18025	5	0.0947905	0.426557	1.1507	6	0.110389	0.402956	0.856925	5	0.0254975	0.219595	2.50044	6	0.115888
650	XP_002293973.1	258	47614.6	TMLQIVTELDGFDAR;VIGSELVQK;FVALGIEPPK;EVLETPLLHPER;GVLLYGPPGTGK;KVEFGLPDLEGR	0;1;1;1;0;0	3	3	110644;181929;208096;222161;229298;229300;229303;229304;229306;271937;271939;271940;271942	EED88982.1	26S proteasome regulatory ATPase subunit, partial [Thalassiosira pseudonana CCMP1335]	0.636756	3	0.0478952	0.207969	0.684371	3	0.0306969	0.198978	0.629008	3	0.0320968	0.154977	0.669392	3	0.160884	0.478999	0.940693	3	0.705929	0.923726	0.779963	3	0.29587	0.674819	0.971726	3	0.808119	0.955652	0.812557	3	0.171183	0.510148	1.02406	3	0.841316	0.964516	0.973471	3	0.927107
651	EJK58406.1	1337	109524	GIGPAYASK;LDVLTGLAEVK;LVDMLSQEYDVCAR;VAGGSNAGHTIVVDGK	0;1;1;1	3	11	147367;147371;147380;147381;229171;229172;229173;278652;278653;278655;278656;278657;278658;293153;293161	-	hypothetical protein THAOC_21471 [Thalassiosira oceanica]	0.900968	11	0.182782	0.465216	0.929273	11	0.329267	0.685302	0.748384	11	0.00239976	0.0240109	0.786116	11	0.0251975	0.150351	1.0772	11	0.39846	0.759354	0.92052	10	0.467553	0.81947	0.93336	11	0.481052	0.845301	0.855105	11	0.283572	0.660321	0.882738	11	0.039996	0.277964	1.00005	11	0.9992
652	EJK65869.1	358	106129	LFMSDDASLR;AGYAFLEASLR;IVDAAMLGAIER;EVADPAAAVYAIPELAALGR	0;1;1;1	3	10	142919;156627;156645;176076;176083;181167;181181;181182;181185;321143;321145	-	hypothetical protein THAOC_13228 [Thalassiosira oceanica]	0.659044	10	0.00069993	0.0095551	0.949175	10	0.523848	0.806815	0.563844	10	0.0019998	0.0208187	0.827542	10	0.0947905	0.344743	1.19793	10	0.0993901	0.378819	0.955006	10	0.587941	0.884122	1.07537	10	0.457554	0.831077	0.91104	7	0.135086	0.450121	0.909926	10	0.235776	0.635326	0.727956	10	0.0134986
653	EJK63051.1	284	71182	DYFVGFLK;AVLLPTVSDVPR;YSFVYVYEDGEWK;NLFQLWNSALATEDPDAVAK	0;1;1;1	3	27	38801;186765;186785;186795;186796;186801;186815;186817;186820;258948;258949;178816;178825;178826;178827;178830;178832;178833;178834;178835;178836;178838;178840;178841;178842;178843;178844;320174;320175;320179;320183;320185;320186;320187;320189;320199;345423;355747	-	hypothetical protein THAOC_16311 [Thalassiosira oceanica]	2.89991	33	0.0001	0.00219734	1.45955	36	0.0001	0.00353298	2.81789	36	0.0001	0.00211861	1.53053	37	0.0001	0.00261133	3.79052	38	0.0001	0.0035271	5.86881	38	0.0001	0.00239976	4.34956	38	0.0001	0.0036731	7.01477	38	0.0001	0.00260844	1.0761	37	0.0279972	0.230114	1.75255	37	0.0001
654	EED90024.1	926	48679.9	GWAFGLGLER;LAMILFEIPDIR;MELIDEFTNPK;WSEDYFPFTTPSYELEIK	0;1;1;1	3	5	127715;225605;267558;267559;267560;357413	XP_002292828.1	phenylalanine-trna synthetase-like protein [Thalassiosira pseudonana CCMP1335]	1.16423	5	0.121988	0.374484	1.13852	3	0.214179	0.58655	1.35673	5	0.177182	0.469964	1.52245	4	0.0149985	0.106827	0.834937	5	0.566643	0.856624	0.990176	5	0.969303	0.990309	0.874468	4	0.161884	0.544656	1.15561	4	0.192781	0.551678	1.16797	5	0.458754	0.821704	0.921926	4	0.348265
655	EJK69871.1	1525	20838.3	GHSLESIMASIEAR;LSSPAPGMK;KPDFDAYIEPQK;AFADYVIEVLPTDLDK	0;1;1;1	3	13	71723;238132;238137;238141;238142;238161;238162;241896;241898;154818;159936;327583;327584;327587;327588;327590;327591;327592;327595;327596;327597;332599	-	hypothetical protein THAOC_08831 [Thalassiosira oceanica]	1.73093	13	0.0001	0.00219734	1.5916	12	0.0001	0.00353298	2.54741	13	0.0001	0.00211861	2.31584	13	0.0001	0.00261133	1.32882	11	0.0001	0.0035271	2.70386	13	0.0001	0.00239976	2.20367	11	0.0001	0.0036731	4.26356	13	0.0001	0.00260844	1.49382	13	0.0001	0.0049995	1.1069	13	0.0980902
656	XP_002290941.1	811	19588.1	STIGVEFATK;IVLLGDSGVGK;GAVGALLVYDVTDR;DCLIMLVGNK	0;1;1;1	3	8	203571;203572;203579;204814;204815;204817;226051;226058;287975;230305;230308	EED91048.1;EJK68942.1	predicted protein, partial [Thalassiosira pseudonana CCMP1335]	1.74879	8	0.00029997	0.00505183	1.32883	6	0.00049995	0.0123412	1.51274	8	0.00789921	0.0569059	1.18183	8	0.0683932	0.290671	1.27699	8	0.030297	0.180478	1.29216	8	0.0737926	0.315503	1.15018	8	0.0174982	0.145147	1.18394	8	0.119488	0.418214	0.901636	8	0.140886	0.516168	1.27049	8	0.0161984
657	ACI64758.1	40	53392.6	IGLFGGAGVGK;TIAMESTDGLVR;VVDLLAPYAK;FTQAGSEVSALLGR;AALVYGQMNEPPGAR;LVLEVAQHLGENTVR;AIAELGIYPAVDPLDSTSR;IPSAVGYQPTLATDMGGLQER;FMSQPFHVAEVFTGTAGK;EGNDLYHEMIEGGVIK;GLQDIIAILGMDELSEDDKLVVSR;GSITSVQAVYVPADDLTDPAPATTFAHLDATTVLSR	0;1;1;0;1;1;1;1;1;1;1;1	10	85	37083;182848;182850;182851;182856;182857;182858;182859;182862;182863;186635;212560;212563;212564;212565;212566;212567;212568;212569;222866;222870;222884;222886;222887;222891;222892;222893;222894;222897;222898;222903;254310;254312;254313;254314;254315;254316;254317;254318;254319;254320;254321;254326;257407;257408;257410;257414;257420;257423;257424;257425;257427;307124;307125;308976;308977;274688;2…	XP_002296041.1;EJK52995.1	F-type H-ATPase beta subunit [Thalassiosira pseudonana CCMP1335]	1.04964	83	0.130387	0.38708	1.01477	85	0.565743	0.833581	1.06078	85	0.191081	0.490223	1.07161	83	0.0273973	0.160292	1.02872	79	0.260474	0.618196	1.09539	84	0.00419958	0.0429503	1.10025	85	0.0001	0.0036731	1.2045	85	0.0001	0.00260844	1.05326	83	0.0239976	0.21384	1.02564	85	0.284272
658	EJK46860.1	263	104105	YGTSVPLAR;HVEFIGHEDLPNK	0;1;1;0;1	3	4	86168;301863	-	nitrate reductase [Thalassiosira oceanica]	0.750514	2	0.292771	0.612744	0.812442	2	0.359264	0.694276	0.784679	2	0.456654	0.753145	0.8378	2	0.549845	0.847039	0.609824	2	0.130587	0.444094	0.428231	2	0.039896	0.213628	0.663453	2	0.212579	0.627872	0.463474	2	0.090491	0.361964	1.069	2	0.70123	0.921997	0.968444	2	0.879112
659	ABK20845.1	203	57192.7	QSIIEAMYHAFYEK;NPVQALELVER;IHIQEFRPNR;GLLLVGIQGTGK;LTAQTPALFLLK	0;1;1;0;1	3	3	60686;179085;191308;228657;263562	YP_874572.1;YP_874622.1;ABK20795.1	conserved hypothetical protein (chloroplast) [Thalassiosira pseudonana]	0.991894	3	0.975802	0.989431	1.14932	3	0.620638	0.859509	1.04933	3	0.819918	0.935195	1.24445	3	0.390261	0.734603	1.51821	3	0.223778	0.575108	1.2348	3	0.530547	0.856273	1.64587	3	0.0964904	0.432046	1.37551	3	0.352865	0.738698	1.07618	3	0.440656	0.808543	0.869877	3	0.244576
660	EED89581.1	426	140403	AVAYLIPFMEK;IMSQALADR;GVVGLFPANR;FVVGAIGPTNR;LPDVGRPK;EICPYVK;MFLPQVIK;WLSPILNYER;VPFMLDASK;FVEAFAEYLHR;WLSPILNYERD;QPLLIGGATTSK;TLSGQTGEAFYASIR;KLPDVGRPK	0;1;1;0;0;1;0;1;1;1;1;1;0;1	9	25	20929;256685;97710;105289;105294;105305;105306;105307;105310;105311;135488;135495;135496;135498;153062;161534;182866;186083;191886;191887;191937;195983;195991;209579;209580;276104;276105;215521;215522;235821;235823;259651;259655;259656;263215;263216	XP_002293120.1	5-methyltretrahydrofolate-homocysteine s-methyltransferase [Thalassiosira pseudonana CCMP1335]	0.80729	23	0.00029997	0.00505183	0.899269	25	0.0234976	0.160389	0.944009	25	0.545445	0.819989	1.00257	25	0.972103	0.991919	0.78881	25	0.00019998	0.00553483	0.615651	25	0.0001	0.00239976	0.926665	24	0.0834917	0.395487	0.707933	25	0.0001	0.00260844	1.12518	25	0.0261974	0.223485	0.966043	25	0.515548
661	EJK76019.1	255	219749	AVFTLAR;AAPALIDPR;ALQDAMSGVIDR;ILVDLPDLETR	0;1;1;0	2	3	42112;75159;181482;181493;184123	-	hypothetical protein THAOC_02237 [Thalassiosira oceanica]	0.900328	3	0.440356	0.741609	0.858992	3	0.163284	0.529567	0.96425	3	0.888311	0.952291	0.912536	3	0.716628	0.905182	1.10008	3	0.464954	0.80087	1.04715	3	0.752625	0.940003	1.20954	3	0.323268	0.728242	1.17785	3	0.507249	0.840745	1.08173	3	0.651435	0.908812	1.07641	3	0.528047
662	EJK72439.1	667	91753	TSPFPYGGAR;GANTYCHWFQPMAASGVR;DTHTAGGYLALDTSSPIFLR;AVGSSQNVSMVNTVLNTIVAEK	0;1;1;0	2	6	111631;111644;111647;111648;111658;111659;111661;328503;334428;334429;334435;334436;334437;357753;357754;357755;357756;357757;358322;358324;358325;358326;358329;358330;358331;358334;358335;358336	-	hypothetical protein THAOC_06032 [Thalassiosira oceanica]	0.735537	6	0.323968	0.642431	0.741069	6	0.394661	0.718198	0.979333	4	0.867813	0.946303	0.928902	6	0.657334	0.891065	0.774357	6	0.444356	0.786033	0.840729	6	0.631937	0.896678	1.15081	5	0.156184	0.536511	1.11947	6	0.466353	0.822123	1.26494	6	0.340066	0.731498	1.15848	5	0.0964904
663	EJK73845.1	379	56783.2	FVLDGVPR;NQLTVTPIK;SLDGTVTLPGSK;IPDAAMTLAVAALFAEGPTTIR	0;1;1;0	2	4	69750;193410;233211;233212;233213;342415	-	hypothetical protein THAOC_04512 [Thalassiosira oceanica]	1.03104	4	0.781522	0.930801	0.93103	3	0.469353	0.76764	1.41861	4	0.0548945	0.224693	1.38287	4	0.0125987	0.0941692	0.558674	4	0.0116988	0.0923079	0.586081	4	0.0143986	0.10124	0.798732	4	0.0571943	0.313871	0.848945	4	0.187781	0.542546	1.39092	4	0.00119988	0.0287971	1.0433	4	0.69553
664	EJK61308.1	1367	16152.7	FANLDIR;AFEPVLILGQDK;SIVAYYAK;TATACAFAK	0;1;1;0	2	9	56747;93058;266357;266361;266362;266363;266367;163414;163415;163420;171450;171451;171452;171454	-	hypothetical protein THAOC_18233 [Thalassiosira oceanica]	0.42129	9	0.00259974	0.0261717	0.526546	9	0.0019998	0.0324652	0.255721	7	0.0001	0.00211861	0.415989	9	0.00039996	0.00750758	0.596951	9	0.0126987	0.0972128	0.589261	9	0.010299	0.0817386	0.455591	8	0.0001	0.0036731	0.441157	8	0.0001	0.00260844	0.859123	9	0.126987	0.488413	0.854935	9	0.0253975
665	EED93949.1	847	113229	LAELNEYVK;NHFDFIVAAANLR;GNTQVVIPNVTENYGATR	0;1;1	2	3	209960;209961;209962;209963;235221;313687;313688	XP_002288513.1	ubiquitin activating enzyme 1 [Thalassiosira pseudonana CCMP1335]	1.02514	3	0.89911	0.97661	1.09539	3	0.608939	0.858638	1.01885	3	0.912009	0.960823	1.12796	3	0.431957	0.777609	0.872491	3	0.377062	0.747339	0.786228	3	0.314769	0.696904	0.898569	3	0.468953	0.83813	0.811392	3	0.452755	0.817591	1.02345	3	0.806619	0.950094	0.929641	3	0.532347
666	EJK72804.1	849	71437.5	YWDMVQR;VFVFDGK;ITVFYTAPTAIR	0;1;1	2	2	95791;130968;130972;202440	-	hypothetical protein THAOC_05626 [Thalassiosira oceanica]	2.71012	2	0.00279972	0.027419	1.59591	2	0.0217978	0.154644	3.08964	2	0.00459954	0.0385292	1.8419	2	0.0232977	0.140881	1.44078	2	0.145085	0.466921	1.44141	2	0.190881	0.547111	1.7069	2	0.0192981	0.153932	1.7384	2	0.0511949	0.253859	1.1634	2	0.378162	0.763713	1.66463	2	0.0263974
667	ANG60897.1	733	60642.4	LTQFTGSSR;YLQFGEISR;SLDDLSVAPVLTHTTK	0;1;1	2	3	95570;129918;321588;321592	-	aldehyde dehydrogenase protein [Skeletonema marinoi]	0.940746	3	0.650135	0.869388	0.786625	3	0.20378	0.576469	1.28975	3	0.319568	0.648133	1.06523	3	0.739426	0.912248	0.651789	3	0.229377	0.57794	0.903991	3	0.626937	0.896678	0.922466	3	0.683732	0.923962	1.30448	3	0.0985901	0.377015	1.36521	3	0.0655934	0.366671	1.22126	3	0.333267
668	XP_002295441.1	732	59296.7	LTQFTGSSR;GAGIGTPEAIK;TTGAPQNHWFGPAGDAR	0;1;1	2	5	95570;193359;193368;292537;292541;292542	ACI64158.1;EJK62218.1	aldehyde dehydrogenase [Thalassiosira pseudonana CCMP1335]	1.11208	5	0.506449	0.796288	1.04262	5	0.762624	0.913546	1.20297	5	0.263074	0.577444	1.17469	3	0.220578	0.579362	1.00266	4	0.978502	0.994138	1.03916	3	0.785721	0.944125	1.05153	5	0.478052	0.845301	1.04647	4	0.658234	0.915893	1.00373	4	0.960104	0.987696	1.20274	4	0.110489
669	EJK67611.1	212	53066.3	GAAHFYGMK;LEPLFSGGGQER;DDTLLVSVMAVNNEIGTR	0;1;1	2	4	184615;184621;185709;185710;315379;315381	-	hypothetical protein THAOC_11333 [Thalassiosira oceanica]	0.976661	4	0.839416	0.955511	1.12726	4	0.20448	0.577543	0.979914	4	0.933807	0.967099	1.1629	4	0.341366	0.697726	1.03411	4	0.721628	0.931283	1.30651	4	0.0425957	0.220323	1.06859	4	0.70333	0.928148	1.39562	4	0.143186	0.463365	1.01964	4	0.866513	0.969441	0.869303	4	0.433557
670	XP_002288120.1	210	53062.4	LPFGIAQIGK;FIPHVIEPSLGVDR;IPMDEVVPYLSK	0;1;1	2	5	201257;255324;255325;277976;277977;280878	EED95563.1	glycyl tRNA synthetase [Thalassiosira pseudonana CCMP1335]	1.31127	5	0.347465	0.665773	0.870185	5	0.518948	0.801323	1.50033	5	0.125887	0.385584	0.977849	5	0.850415	0.950588	0.998045	5	0.982402	0.994138	1.22104	5	0.152185	0.49004	1.16841	5	0.139686	0.521353	1.7431	4	0.00049995	0.00988912	1.20569	3	0.0790921	0.403812	1.44375	3	0.0124987
671	EED86648.1	616	46209.6	GDLGVEIPFR;VICTLGPSTDSK;GVNLPNTAIDLPALTEK	0;1;1	2	3	126736;126737;255868;328679;328680	XP_002296920.1	pyruvate kinase, partial [Thalassiosira pseudonana CCMP1335]	1.04151	3	0.883512	0.972895	1.00295	3	0.975802	0.992883	0.958222	3	0.813019	0.932048	0.931207	3	0.583942	0.862868	1.30309	3	0.291371	0.661004	1.39042	3	0.181982	0.531195	1.24513	3	0.171883	0.56045	1.35602	3	0.0709929	0.32072	0.952306	3	0.607739	0.893901	1.05292	3	0.788221
672	EJK47930.1	670	45379.2	VSQLCMR;GENEYFTALK;EPACASLSLSELCK	0;1;1	2	4	67490;232412;305996;306018;306022	-	hypothetical protein THAOC_33313 [Thalassiosira oceanica]	0.743021	4	0.019598	0.111056	0.890491	5	0.173383	0.539612	0.671038	4	0.0171983	0.0999165	0.796386	5	0.0827917	0.32084	0.659197	5	0.0335966	0.1956	0.63939	5	0.0115988	0.0862724	0.616385	5	0.00339966	0.0430943	0.572916	3	0.00479952	0.0505213	0.92769	5	0.218378	0.620981	0.783709	5	0.0121988
673	XP_002287162.1	211	45097.5	GAAHFYGMK;ILFHTDAAQMLGK;KHVITTQTEHK	0;1;1	2	2	184615;184621;287275;313452	EED94605.1	cysteine desulfurase [Thalassiosira pseudonana CCMP1335]	1.03938	2	0.890211	0.973724	0.950559	2	0.79622	0.921509	1.57222	2	0.217878	0.524137	1.23358	2	0.385661	0.729236	0.537339	2	0.020198	0.138688	0.630991	2	0.19598	0.553205	0.736178	2	0.159284	0.538931	0.694392	2	0.179682	0.526755	1.22388	2	0.239576	0.639136	1.16604	2	0.471853
674	EED88939.1	773	42647	VGITDGFIR;DGLHGGMLWFDVK;YYDGLNIGTGGALIAK	0;1;1	2	8	90073;90074;121435;291935;291936;294605;313425;313427;313428;313429	XP_002293930.1	cystathionine beta-lyase [Thalassiosira pseudonana CCMP1335]	1.25398	8	0.0652935	0.252487	0.872106	8	0.020398	0.147619	1.81295	8	0.0167983	0.0985465	1.24595	8	0.0793921	0.313051	0.640564	8	0.009999	0.0813946	0.623632	8	0.0207979	0.133225	0.950525	8	0.30207	0.714031	0.940834	8	0.462854	0.822123	1.31887	7	0.00159984	0.0342823	1.43228	8	0.00969903
675	EED92818.1	1524	42515.5	GHSLESIMASIEAR;VSGLTALNTAEQK;KVSGLTALNTAEQK	0;1;1	2	6	71723;238132;238137;238141;238142;238161;238162;241896;241898;266812;266813;328492;328493;328494;328495	XP_002289281.1	phosphoribulokinase [Thalassiosira pseudonana CCMP1335]	1.57532	5	0.00429957	0.0365463	1.41749	6	0.00439956	0.0550556	1.9921	6	0.00259974	0.0253088	1.61439	6	0.00049995	0.0091001	1.4513	6	0.00069993	0.012225	2.04718	5	0.0001	0.00239976	1.70091	6	0.00019998	0.00571371	2.47184	5	0.0001	0.00260844	1.13414	5	0.0542946	0.33355	1.15689	5	0.0561944
676	XP_002289138.1	403	40062.7	TLQESVASELAAR;LGGEAADLPLLTQR;TLVPFSASEISQK	0;1;1	2	10	207984;207985;207987;207990;207991;207992;227264;227265;227266;227267;227270;227271;227272;227274;280919;280920	EED92675.1	ATP synthase [Thalassiosira pseudonana CCMP1335]	0.560273	10	0.0001	0.00219734	0.700353	10	0.00159984	0.0277203	0.455444	10	0.0001	0.00211861	0.575197	10	0.00449955	0.0447966	1.30309	10	0.0001	0.0035271	2.41702	10	0.00019998	0.0040905	1.2648	8	0.00079992	0.0153176	2.11521	10	0.0001	0.00260844	0.888309	9	0.108789	0.459672	0.828237	10	0.0162984
677	XP_002296153.1	215	33966.5	LADFGLAR;DLKPQNLLVSR;RPLFPGDSEIDELFK	0;1;1	2	5	60043;256969;256971;328363;328366;328367	ACI64870.1	cell division control protein, cdc2, cyclin-dependent kinase, cdk1, p34, partial [Thalassiosira pseudonana CCMP1335]	0.630015	5	0.0266973	0.1359	0.805865	5	0.0564944	0.290865	0.65851	5	0.0365963	0.169434	0.787147	4	0.0347965	0.187174	0.715828	5	0.019898	0.137679	0.478312	3	0.00079992	0.0128559	0.844904	4	0.090291	0.412497	0.537815	5	0.00609939	0.0609939	0.949663	4	0.582842	0.885937	0.819162	5	0.231977
678	EED92502.1	822	32673.8	HYGGLQGLNK;FMPVWENEIAPAIK;EAGFTFDVAYTSVLK	0;1;1	2	7	211958;315611;315612;315613;315614;317457;315930;315931	XP_002290750.1	phosphoglycerate mutase [Thalassiosira pseudonana CCMP1335]	1.39933	5	0.00349965	0.0326755	1.22218	7	0.0617938	0.303413	1.69393	7	0.00129987	0.0146317	1.50958	7	0.00059994	0.010199	0.739349	6	0.00169983	0.0248617	1.00207	7	0.975802	0.991221	0.985947	7	0.909909	0.982505	1.25709	7	0.0891911	0.359964	1.11188	6	0.0427957	0.291789	1.1149	7	0.343366
679	EED96494.1	942	27481.5	VGAGIDNVAGVK;VNALENVTIPK;SGMAADSSSAFFSLTQAEYAAGNFK	0;1;1	2	3	215149;215152;238485;238486;364595	XP_002286853.1	v-type h-atpase subunit [Thalassiosira pseudonana CCMP1335]	1.16883	3	0.575642	0.8363	1.13229	3	0.228477	0.602097	1.02305	3	0.90311	0.958563	1.00495	3	0.969703	0.991717	1.03304	3	0.79872	0.95303	1.10708	3	0.480952	0.830819	0.948419	3	0.817918	0.958226	1.02688	3	0.866413	0.969879	0.911668	3	0.466653	0.827988	1.03818	3	0.847815
680	XP_002292528.1	1431	22558.9	FLDLSVGSR;SFLENPLISR;YANATYIAASK	0;1;1	2	4	94777;94778;149801;149809;232692;232700	EED90503.1	synthase of ATP synthase [Thalassiosira pseudonana CCMP1335]	0.877816	4	0.405759	0.716842	0.743845	4	0.0223978	0.156437	0.616564	4	0.0873913	0.301517	0.52446	4	0.0105989	0.0816209	1.29604	3	0.0943906	0.364782	1.28369	4	0.338066	0.71696	1.11738	4	0.610239	0.902934	0.956089	4	0.840616	0.966068	0.760018	4	0.029797	0.234212	1.2168	4	0.0469953
681	EJK74044.1	1430	22241.7	FLDLSVGSR;SNNLETVESELLAIK;RGEVEATIISAEPLNK	0;1;1	2	8	94777;94778;317341;317342;317344;317345;317346;317347;324869;324870	-	hypothetical protein THAOC_04305 [Thalassiosira oceanica]	0.810502	8	0.0737926	0.273048	0.802667	8	0.0156984	0.125171	0.638234	8	0.00059994	0.00806337	0.640919	8	0.00029997	0.00607355	1.19621	8	0.0440956	0.231953	1.05719	7	0.345065	0.724758	0.996678	8	0.961804	0.993827	0.907726	8	0.080492	0.347447	0.825833	7	0.00229977	0.04549	1.04166	8	0.438256
682	EJK71823.1	596	21752.8	LVGEYGLR;IFEGAALLR;HIDISANSPYGQGAPGR	0;1;1	2	6	70761;93560;285654;285655;285657;326100;326101	-	hypothetical protein THAOC_06697 [Thalassiosira oceanica]	0.524846	7	0.0218978	0.121415	0.829042	7	0.0750925	0.34303	0.349694	7	0.0358964	0.167053	0.744384	6	0.133387	0.428454	0.981047	7	0.90331	0.979117	0.962169	7	0.828017	0.957245	0.772442	6	0.0283972	0.193566	0.692036	7	0.00319968	0.0373548	0.868422	6	0.210279	0.615201	0.662316	7	0.0213979
683	EED86160.1	48	18039.2	SADIYPR;TNPNVGLDPEALSLATPR;NPTTYDGLESIAEIHPSIK	0;1;1	2	11	133926;305482;305485;305486;305487;305488;305489;350519;350520;350521;350527;361467	XP_002297520.1;ABK20717.1;sp|A0T0N2.1|CY550_THAPS;YP_874494.1;EJK50467.1;ADB27528.1;YP_004072574.1;EJK54087.1	cytochrome c550, PsbV [Thalassiosira pseudonana CCMP1335]	1.37296	9	0.00019998	0.00367718	1.5454	11	0.00029997	0.00858009	1.68788	11	0.00039996	0.00610447	2.13762	11	0.0001	0.00261133	0.433239	11	0.00039996	0.00827044	1.29618	11	0.0307969	0.175425	0.607551	11	0.00019998	0.00571371	1.85334	11	0.0001	0.00260844	1.35955	11	0.00049995	0.0157879	0.802054	11	0.0547945
684	EJK47098.1	481	27021.6	LVHFLEGGEAGNR;AQGGFYVPAQPK;EANNFLWPFK;LIEPYVTYGYPTR;IPIADNSVIEEGVGSVGIK;LVHFLEGGEAGNRGEEINK	0;1;0;1;1;0	3	17	213902;213903;252919;252920;252925;253559;253568;253893;253897;253899;253900;253910;253934;306879;306889;306890;306893;339278;339279;339280;339283;349764	-	hypothetical protein THAOC_34210 [Thalassiosira oceanica]	0.54734	22	0.0001	0.00219734	0.876288	22	0.00349965	0.0460319	0.455877	22	0.0001	0.00211861	0.742405	22	0.0001	0.00261133	0.999567	22	0.993601	0.997683	1.00634	21	0.926207	0.980523	0.845234	21	0.019498	0.153932	0.784056	20	0.00259974	0.0334252	0.886202	22	0.00729927	0.102646	0.639109	21	0.0001
685	EJK71308.1	81	36314.9	VINDEFGIK;AGIALTDNFVK;LVSWYDNEAGYSNR;VLDLISHMEAQK;AACYNIIPSSTGAAK;EGLMTTVHAVTATQQTVDGPSQK	0;1;0;1;0;1	3	13	198875;198876;198888;227089;227090;227093;227094;273802;273803;273805;273806;276527;276528;276554;276555;276557;276566;300082;300083;300087;300088;300092;361675;361676;361955	-	hypothetical protein THAOC_07275 [Thalassiosira oceanica]	1.01206	17	0.834517	0.954187	1.27637	17	0.00069993	0.014666	1.01729	17	0.780522	0.921018	1.31922	17	0.00019998	0.00462005	0.796736	17	0.0019998	0.0270499	0.760263	17	0.00279972	0.0314968	0.869857	16	0.030397	0.202563	0.799595	17	0.0319968	0.189981	1.03259	17	0.363064	0.754636	0.816617	14	0.0001
686	XP_002290876.1	1052	95085.7	VLEIEGLPDLK;VPPGVDEAAYVK;MLVPDTVGTGGDSHTR;GHPLAYVGDVVGTGSSR;GGVSLRPGDGIIHSWLNR;IDEVFIGSCMTNIGHFR;EPVIEYLQSNVVMLK;LNKEPVIEYLQSNVVMLK	0;1;0;1;0;0;1;1	4	9	245049;245057;245058;245059;245065;245066;249109;249110;267903;267904;270946;270948;270950;273473;273478;273479;273506;313875;313880;313881;313884;320952;328249;328250;362417	EED92628.1	aconitase hydratase 2 [Thalassiosira pseudonana CCMP1335]	1.03681	9	0.511349	0.798326	1.10276	9	0.335866	0.685302	1.01702	9	0.749125	0.912091	1.09584	9	0.451555	0.787643	0.934174	8	0.208579	0.557475	0.954014	9	0.509549	0.849129	0.943558	8	0.278472	0.69768	0.979203	9	0.794821	0.952951	1.00797	9	0.79532	0.945559	0.949696	9	0.650435
687	EED95846.1	858	39942.8	VPTIDVSVVDLTCK;VIPSLQGK;VIYSAPAK;AQAIIDGGAK;YDTIHGIAK;AASGNIIPSSTGAAK;LVAWYDNEWGYSGR;EVGWGALGADYVCESTGVFLTK;AIHDEFDIQEALMTTVHAMTATQAVVDSSSR	0;1;0;1;0;0;1;0;1	4	17	135909;303485;303486;303488;303490;303491;303492;303493;303494;303495;303498;303499;303500;303501;303502;303503;303504;303505;303506;303507;303509;140371;140372;140374;140375;140376;140377;140380;140393;142576;172443;172451;172458;172459;172460;172462;172463;172464;172471;172472;172473;172475;172477;172481;172482;172483;172484;194430;194431;194433;194435;194436;194438;194440;194441;194442;194446;…	XP_002286205.1	glyceraldehyde-3-phosphate dehydrogenase precursor, partial [Thalassiosira pseudonana CCMP1335]	1.40452	17	0.00029997	0.00505183	1.26491	17	0.0001	0.00353298	1.92481	17	0.0001	0.00211861	1.75832	13	0.0001	0.00261133	0.818618	17	0.00409959	0.0431296	1.5175	17	0.0001	0.00239976	1.03927	15	0.534647	0.87013	2.19219	15	0.0001	0.00260844	1.30764	14	0.0001	0.0049995	1.17595	13	0.0001
688	EED91058.1	1466	53055.4	ATDVMMAGK;HSLPDGIMR;VADISLADYGR;FDNLYGCK;INIKPQVDR;AVICGYGDVGK;KAEDAFLK;SKFDNLYGCK;KAVICGYGDVGK;WCSCNIFSTQDHAAAAIAR;NNAIVGNIGHFDNEIDMAGLMK	0;1;0;1;0;0;0;1;0;0;1	4	10	32462;166166;166172;166173;166177;166178;166180;166181;171120;171121;171125;171128;171129;171132;171133;171134;171136;171137;171138;171139;103879;108554;151001;151008;151011;151012;151016;151024;151030;234307;194053;194060;211120;211124;211129;211134;224657;224658;224660;224661;224665;224666;224667;286969;286971;245052;245053;245054;245060;245061;245062;245064;245068;302017;302018;306788;306789;3…	XP_002290951.1;EED91449.1;XP_002291342.1	hypothetical protein THAPSDRAFT_28496 [Thalassiosira pseudonana CCMP1335]	1.17081	10	0.0467953	0.204673	0.911291	10	0.374963	0.704603	1.47225	10	0.00609939	0.0473491	1.15875	10	0.138886	0.44006	0.46881	10	0.00089991	0.0149902	0.418926	10	0.00079992	0.0128559	0.609797	10	0.00019998	0.00571371	0.548709	10	0.00079992	0.014256	1.2579	10	0.0142986	0.152292	1.26641	10	0.0810919
689	EED95701.1	825	183556	VLDWSTFR;SVAMNLTVPTR;NVISFDGSYVNYR;TMIESFEQFVNK	0;1;0;1	2	3	103329;158884;245764;294231;294235	XP_002286060.1	DNA directed RNA polymerase II, largest subunit [Thalassiosira pseudonana CCMP1335]	1.06825	3	0.625637	0.860808	1.45104	3	0.00759924	0.0773663	0.741573	3	0.113689	0.361755	1.08495	3	0.531347	0.837177	1.43585	3	0.0264973	0.16381	1.84398	3	0.00369963	0.0394043	1.05448	3	0.651035	0.909971	1.37936	3	0.0559944	0.269492	0.76149	3	0.0274973	0.228917	0.729904	3	0.0239976
690	EJK60029.1	273	126479	AVDPFLK;KQSIIEANVDAR;EASSIFPIKDCYIR;LCVEDVQGFNCLLNFHGMDMTR	0;1;0;1	2	2	124008;124017;269055;321833;360962	-	hypothetical protein THAOC_19689 [Thalassiosira oceanica]	0.478908	5	0.107489	0.344042	0.667303	5	0.230877	0.604971	0.409071	5	0.059594	0.235765	0.541243	5	0.115188	0.392381	0.647429	5	0.0884912	0.353028	0.485498	4	0.00059994	0.0104844	0.573435	5	0.0152985	0.131757	0.411398	4	0.0001	0.00260844	0.907688	5	0.106689	0.457436	0.774907	4	0.0188981
691	EJK66267.1	1690	81266.4	DLAILPR;LIADMPNVFR;FEGSQLPSSVLR;SITLVDTPGILSGEK	0;1;0;1	2	6	45917;149732;149733;154681;154694;193794;301124;301138	-	hypothetical protein THAOC_12827 [Thalassiosira oceanica]	0.667764	6	0.00089991	0.0113401	0.878437	6	0.0355964	0.217065	0.735346	6	0.00679932	0.0508115	0.866456	5	0.0749925	0.304361	1.30444	5	0.0239976	0.154185	0.962553	6	0.825617	0.955699	1.43031	5	0.00069993	0.0143167	1.07038	6	0.589841	0.885224	1.1172	4	0.140986	0.516168	0.830898	4	0.0581942
692	EJK73006.1	1369	31553.1	VVTESAYDAWYR;VQQLDVLCETK;LTSPTSQIQAYVFDVIR;LKEAASHQAEADK	0;1;0;1	2	4	228493;228494;266926;266931;266932;314371;322237	-	hypothetical protein THAOC_05399 [Thalassiosira oceanica]	0.841349	4	0.328467	0.646177	0.710289	4	0.0291971	0.191321	0.70952	4	0.109089	0.353686	0.598016	4	0.00089991	0.0141012	0.966463	4	0.717928	0.928507	0.678743	4	0.010399	0.0817386	0.902479	3	0.391261	0.782375	0.604131	4	0.00109989	0.0173667	0.882161	4	0.106889	0.457436	1.21647	4	0.284872
693	XP_002289796.1	1366	16173.7	FANLDIR;ATLMAYDR;TATACAFAK;GGGFTAQIYAIR	0;1;0;1	2	9	56747;79615;79616;79617;79619;171450;171451;171452;171454;174354;174355;174359;174373;174423	EED93333.1	RS16, ribosomal protein 16 40S small ribosomal subunit [Thalassiosira pseudonana CCMP1335]	0.394112	9	0.00059994	0.00858009	0.493784	9	0.00069993	0.014666	0.264138	9	0.0009999	0.011926	0.326642	7	0.0001	0.00261133	0.887796	9	0.0857914	0.347233	0.956182	9	0.606139	0.888086	0.691143	8	0.00589941	0.0672085	0.742029	6	0.00259974	0.0334252	0.799426	8	0.0159984	0.164555	0.709232	7	0.0001
694	XP_002290123.1	903	41232	LDPYAAAAR;GPLVIYK;NLPGVELCCVDR;LNLLQLAPGGHMGR;DILAAVGALADVEK;IINSDEIQSVLNPAK	0;1;0;0;1;1	3	11	81445;124035;124038;124039;221795;221798;232708;232709;232710;232718;232719;236359;236367;236369;276798;276799;276801;276802;276805;315229;315230;315231	EED91875.1	RL4e, ribosomal protein 4e 60S large ribosomal subunit [Thalassiosira pseudonana CCMP1335]	0.27661	11	0.0001	0.00219734	0.548784	11	0.0001	0.00353298	0.268951	9	0.0001	0.00211861	0.396683	11	0.00019998	0.00462005	1.14311	11	0.0288971	0.175628	1.04942	11	0.589641	0.884462	0.906269	11	0.319768	0.728242	0.817815	11	0.0952905	0.371262	0.829737	11	0.0370963	0.261856	0.568636	10	0.0001
695	XP_002287516.1	1083	62125.8	IMVGLEK;DVFSQAK;QPEVYSK;GVILDGPPGTGK;LVNNSYITAK;VDILDQALLRPGR;QYLESQLAVALGGR;LELAEVVDFLK;NAPCIIFIDEIDAVGR;VTFSADGTQLLGVDTDGTR;KNAPCIIFIDEIDAVGR;TPGFSGAQLENLMNEAAISAAR;RTPGFSGAQLENLMNEAAISAAR;AVAGEAGVPFISISGSEFVEMFVGVGASR;EQTINQILVEMDGFDGNPGIITIAATNR;QNELVAYHEAGHAICGALIPDYDQVQK	0;1;0;0;1;0;0;1;0;0;0;0;0;0;0;1	4	7	124011;125359;125363;125368;143058;143059;228423;217996;220848;220853;230123;230124;230125;230126;230127;230128;230130;239234;239242;239243;239246;239250;239252;255518;295900;295905;295908;315984;315999;316002;316003;316004;316005;316006;316007;316009;316011;316013;316014;316015;341710;341711;341712;342549;342554;342555;343540;343541;351191;351193;351194;351195;351962;351965;351966;351967;365043;…	EED94959.1	metalloprotease, partial [Thalassiosira pseudonana CCMP1335]	0.746929	7	0.00379962	0.0337286	0.736995	7	0.00059994	0.0138602	0.582306	7	0.00229977	0.023269	0.575318	7	0.0001	0.00261133	0.897526	7	0.167083	0.501271	0.720633	6	0.00189981	0.0247801	0.737044	7	0.00529947	0.0619419	0.629544	7	0.00089991	0.015427	0.860795	6	0.0111989	0.134387	1.04478	7	0.487851
696	ADB27565.1	691	105357	FFRPEFLNR;ALAQLNITLK;LIGSPPGYVGFQDGGQLTEAVR;NNPVLVGEAGVGK;LIGQHHAITAVSK;KNNPVLVGEAGVGK	0;1;0;0;1;0	2	2	165577;211580;215699;215700;343395;343396;251124;251126;251130;274875;320414	YP_004072651.1;YP_004072612.1;ADB27604.1	chaperonin ClpC (chloroplast) [Thalassiosira oceanica CCMP1005]	0.889386	2	0.663834	0.875488	0.945766	2	0.773123	0.913546	1.03257	2	0.924708	0.963631	1.12289	2	0.636036	0.886696	0.628461	2	0.345265	0.717041	0.74263	2	0.433357	0.795961	0.756603	2	0.254275	0.677315	0.904523	2	0.712329	0.936167	1.19712	2	0.30247	0.703651	0.948481	2	0.80422
697	EJK46258.1	45	65130.2	TNVIPIIEDAR;GNVYAVEFSHRPGR;ASCIDSTAAPEAVFR;IVALNSHYFLK;DHCVLISQYRPTK;LQSENFKPLEQLTLEPYER	0;1;0;0;1;0	2	4	170245;170246;170248;170252;170253;170254;170259;257266;257267;258336;258342;258343;258345;258346;261443;261446;312269;312272;360036;360037;360038;360043;360044	-	hypothetical protein THAOC_35086 [Thalassiosira oceanica]	0.843267	23	0.00289971	0.0282447	0.971577	23	0.640336	0.870608	0.770819	23	0.0001	0.00211861	0.903024	23	0.0882912	0.332152	0.935849	23	0.40236	0.760623	0.914751	22	0.270773	0.646126	0.894659	23	0.0918908	0.415587	0.843518	23	0.0263974	0.167898	0.971632	22	0.264974	0.6679	0.889024	23	0.00539946
698	XP_002291508.1	244	71465.7	DAGAISGLNVLR;EIAEAYLGK;ITITNDKGR;NTTVPAKK;TTPSYVAFTETER;AEEISSMVLTK;MVDYFLQDFK;NGLENYCYSLK;FEDLCMDYFK;NAVVTVPAYFNDSQR;IINEPTAAAIAYGLDQK;TQTFSTYADNQPGVLIQVFEGER;KTQTFSTYADNQPGVLIQVFEGER	0;1;0;0;0;1;0;0;0;0;1;0;0	3	38	152985;152986;152990;152993;188235;188236;188244;188246;188249;188250;188251;188252;188253;260024;260025;260032;194491;230434;238326;238327;296466;296475;240899;240901;240902;240903;240906;240907;240908;240922;240923;240924;240925;244477;244478;244480;244484;244494;244497;244500;244503;244504;261547;264632;264633;264634;264638;272032;272034;272039;272051;273392;273406;273407;273411;273412;318695;…	EED91615.1	heat shock protein 70 [Thalassiosira pseudonana CCMP1335]	0.945022	36	0.0874913	0.300876	0.964371	37	0.171283	0.537099	0.896877	35	0.00069993	0.0090041	0.893334	38	0.00019998	0.00462005	1.03245	38	0.535946	0.843246	0.930736	38	0.219778	0.588814	1.02025	37	0.619038	0.902934	0.915408	38	0.109989	0.402399	0.962138	38	0.130287	0.492682	1.0075	35	0.788621
699	EJK66117.1	1338	47525.2	GSIAYAK;LWIVEAER;NPDALELLR;SVGLMATLK;KNPDALELLR;ALCPEMLATDLADYLVR;ANQCPLGSGALAGNAFGVDR	0;1;0;0;0;0;1	2	5	100414;100943;100944;100951;108338;108343;165046;231798;315812;318620;318621	-	hypothetical protein THAOC_12984 [Thalassiosira oceanica]	0.937501	10	0.584642	0.838699	1.03713	11	0.728727	0.902269	1.00974	11	0.946805	0.973841	1.03118	11	0.787721	0.932025	0.808865	11	0.0762924	0.328349	0.718945	11	0.0308969	0.17544	0.82456	9	0.0356964	0.224663	0.802256	10	0.0862914	0.355055	1.01012	11	0.874113	0.969441	0.99969	11	0.9965
700	ADB27602.1	475	44685.5	GTVATGR;TLDEGFAGDNVGILLR;EHILLAK;TIGAGVVSK;TFLMAIEDVFSITGR;NMITGAAQMDGAILVVSAADGPMPQTR;QVGVPHIVVFLNK;MTAELIYPVAIEEGMR;HYAHVDCPGHADYVK;TKPHVNIGTIGHVDHGK	0;1;0;0;0;0;0;0;0;0	1	19	22445;103847;276917;276928;276930;276934;276936;276937;276940;276941;276942;276944;276947;276948;276949;276950;276953;276955;276957;276960;134745;134746;137198;137199;137200;278929;278937;281723;281737;280581;282371;361883;361884;361886;362198;362199;362200;362201;362203;362514;288128;288129;299201;299204;299205;299208;299212;299213;299217;299218;299219;299220;299221;299224;301758;301759;301760;3…	YP_004072649.1	translation elongation factor EF-Tu (chloroplast) [Thalassiosira oceanica CCMP1005]	1.36236	19	0.00059994	0.00858009	1.07564	17	0.0138986	0.115713	1.30648	18	0.00069993	0.0090041	1.11569	18	0.0717928	0.298089	1.00619	19	0.90401	0.979117	1.26591	17	0.0001	0.00239976	1.04499	19	0.40216	0.788399	1.20883	18	0.0106989	0.0871406	1.03305	19	0.393861	0.774808	1.18204	19	0.00609939
701	ABK20837.1	689	102409	FFRPEFLNR;LIGATTLDEYR;GTGFVASEIPFTPR;NNPVLVGEAGVGK;KNNPVLVGEAGVGK	0;1;0;0;0	1	5	165577;173813;173814;173818;173821;173829;233119;233123;233124;251124;251126;251130;320414	YP_874614.1	ATP-dependent clp protease ATP-binding subunit (chloroplast) [Thalassiosira pseudonana]	0.557964	5	0.00349965	0.0326755	0.937292	5	0.356464	0.693681	0.401686	4	0.00019998	0.00360164	0.785013	3	0.0889911	0.332385	1.00717	5	0.919808	0.985949	1.14073	5	0.469353	0.821824	0.872782	5	0.0764924	0.377175	1.12136	4	0.286471	0.662787	0.873455	5	0.149185	0.52483	0.627494	5	0.0111989
702	EJK49854.1	1302	44113	AGADIILTYYAK;DVVLETLTCFK;TNLACEAYNPEGIVHR;DALDSHPGFGDKK;DALDSEGFTNVSILSYTAK	0;1;0;0;0	1	2	260211;260212;260213;260214;265291;265292;302512;302517;302518;302528;302529;335419;320926;347842;347843;347846;347849;347852	-	hypothetical protein THAOC_31221 [Thalassiosira oceanica]	1.53653	2	0.128687	0.384568	0.977171	2	0.90371	0.964742	2.01685	2	0.0476952	0.202012	1.28098	2	0.311069	0.673733	1.0749	2	0.770523	0.945546	1.69068	2	0.0672933	0.300565	1.46308	2	0.0861914	0.405075	2.35864	2	0.00519948	0.0540986	1.32973	2	0.10179	0.445795	1.56849	2	0.0445955
703	YP_009093250.1	248	35312.9	DEFSLIPGVR;AQINTIGDLLEYSPEK;SADEVFATLK;EDILEILLNLK;KSADEVFATLK	0;1;0;0;0	1	4	136035;187615;331007;331011;331012;210471;262967;298274	AIR75923.1	RNA polymerase alpha subunit (chloroplast) [Roundia cardiophora]	0.711687	4	0.0115988	0.0746468	0.880244	4	0.231877	0.605568	0.681408	4	0.040296	0.179193	0.732617	3	0.0675932	0.288633	0.635589	4	0.0178982	0.126767	0.658599	4	0.0551945	0.263528	0.539801	3	0.00019998	0.00571371	0.536016	3	0.00249975	0.03333	0.993835	4	0.953405	0.985468	0.858201	4	0.115988
704	BAA75793.1	135	16012.6	SCAAGYIR;QIVYSIKSYSVQANPEGSR;QIVYSIK;SYSVQANPEGSR;NNYWELWGLPLFDIK	0;1;0;0;0	1	1	68375;68376;68377;68381;68385;68391;114945;143301;228459;187248;187250;187251;187252;187253;187254;187256;187257;187258;187259;187260;187261;187263;187264;187265;187266;187267;187275;259222;259225;259227;259228;259230;259231;259235;259241;259242;259243;259245;259246;259247;259248;259249;259250;259252;259255;259257;259258;259259;259262;259263;259270;259273;259274;259275;259295;340040;340044	sp|O98946.1|RBS_DETCO	ribulose-1,5-bisphosphate carboxylase/oxygenase small subunit (chloroplast) [Detonula confervacea]	1.07446	1	0.853615	0.959809	0.964241	1	0.89871	0.962255	1.00528	1	0.991101	0.997184	0.9118	1	0.791021	0.932824	1.40969	1	0.360964	0.732621	1.13136	1	0.766623	0.943972	1.34075	1	0.341966	0.741202	1.10021	1	0.812619	0.958843	0.972093	1	0.908009	0.977429	1.10717	1	0.733727
705	EJK73254.1	1443	117849	LEPAYGADVLR;AVLTHGFVLDEK;KLEPAYGADVLR;SWGVPIPVFYDK	0;1;0;0	1	3	158588;266126;266128;266135;266820;266825;281048;281049;281050	-	hypothetical protein THAOC_05131 [Thalassiosira oceanica]	1.38448	3	0.229977	0.531988	1.41442	3	0.0647935	0.311354	1.77225	3	0.110289	0.35534	1.8666	3	0.0213979	0.134045	0.756538	3	0.0815918	0.341357	0.769951	3	0.115188	0.41551	0.997389	3	0.990701	0.996081	1.0305	3	0.831217	0.962799	1.28046	3	0.0291971	0.232543	0.951829	3	0.674933
706	EJK46027.1	1495	54202.5	AVYSALVEAEHR;ILDDVLTDLIDR;GLIPADPETWSVR;DYANVKDPSLLR	0;1;0;0	1	1	200326;214391;224149;277962	-	hypothetical protein THAOC_35331 [Thalassiosira oceanica]	1.1113	1	0.793821	0.937395	1.22885	1	0.469753	0.76764	0.940948	1	0.908109	0.960543	1.15371	1	0.684932	0.894917	0.805477	1	0.555344	0.851758	0.806081	1	0.608939	0.888242	0.712484	1	0.281072	0.700262	0.685203	1	0.360564	0.741354	0.917566	1	0.716128	0.926526	0.862859	1	0.622638
707	EJK69505.1	1119	53744.4	IQNMGFVR;TGGYGITDVAWR;SANDIPGNLYNVK;ISSSGVSGASYFTGSIVNEQR	0;1;0;0	1	2	86378;86383;90906;187530;187532;280528;280532;280533;335257;335258;353337	-	hypothetical protein THAOC_09231, partial [Thalassiosira oceanica]	1.46718	2	0.163784	0.446502	1.45871	2	0.0557944	0.289745	1.10525	2	0.763924	0.918442	1.12545	2	0.628737	0.885578	1.35303	2	0.225477	0.576785	1.3648	2	0.264074	0.640232	1.07102	2	0.740426	0.936461	1.0916	2	0.746625	0.940466	0.790138	2	0.169083	0.557056	1.00395	2	0.985001
708	EJK76215.1	586	47675.8	TIAEWSVDPR;AANAMQACEK;LIDQHYYAIASK;KLIDQHYYAIASK	0;1;0;0	1	2	149103;149154;213610;213615;283528;283530;336288	-	hypothetical protein THAOC_02038 [Thalassiosira oceanica]	0.843045	7	0.0741926	0.273965	0.935568	7	0.510549	0.798932	0.843518	7	0.208179	0.515015	0.939272	7	0.658234	0.891065	0.957992	7	0.690831	0.916788	0.884669	7	0.328067	0.71041	1.00043	7	0.9966	0.999376	0.933955	7	0.645035	0.908501	1.03092	7	0.69693	0.920906	0.924611	7	0.628837
709	ACI64235.1	683	46517.1	GVYETPGGTLLR;SDLLAYCTK;FEMCAQALDAK;HGIPVDAKPK	0;1;0;0	1	2	177279;177280;177282;177284;177287;177292;252935;207986;207993;257010;257016;257021;257022;257023;273172;273173	XP_002295518.1	ASSY [Thalassiosira pseudonana CCMP1335]	0.75881	2	0.309069	0.625778	1.03921	2	0.841216	0.94212	0.828233	2	0.562244	0.828259	1.14205	2	0.585141	0.862868	0.547764	2	0.0237976	0.153448	0.372622	2	0.00259974	0.0301905	0.619974	2	0.0353965	0.224663	0.422241	2	0.00469953	0.0500542	1.10235	2	0.572843	0.88387	0.75944	2	0.19798
710	EJK63640.1	7	36686.9	FPQLFTGK;VYIPLPEPEAR;AIIFIDEVDSLCGSR;AVATEADSTFFSVSSADLVSK	0;1;0;0	1	3	170663;184070;184071;184084;277828;277836;352679	-	hypothetical protein THAOC_15690 [Thalassiosira oceanica]	0.769526	7	0.0246975	0.129	1.05376	6	0.513749	0.79946	0.684355	7	0.0392961	0.176489	0.962471	6	0.771923	0.923642	1.26167	7	0.00219978	0.0288862	1.36112	7	0.00979902	0.0794515	1.17094	7	0.0879912	0.405075	1.301	7	0.0613939	0.285553	0.936223	7	0.352965	0.74567	0.730444	6	0.0225977
711	EJK58017.1	1618	27749.6	NTYGYLEPDLWK;SGMPHTVPTK;EAEIIDYFLK;IGSIEEIFLFSIPVK	0;1;0;0	1	4	126221;295913;295923;295927;295935;295936;203957;203958;203963;203964;248284;248285;248286;248287;248289;248296;248297;248311;321063	-	hypothetical protein THAOC_21891 [Thalassiosira oceanica]	0.634823	4	0.0511949	0.216894	0.590359	4	0.0217978	0.154644	0.774022	4	0.212579	0.52089	0.638943	4	0.0358964	0.191377	0.651397	4	0.00239976	0.03019	0.56729	4	0.0219978	0.136538	0.784773	4	0.0272973	0.188257	0.677192	4	0.0658934	0.301802	1.1516	4	0.0760924	0.395856	1.23902	4	0.113789
712	XP_002286733.1	271	17115.5	GLVGDIIAR;GDYSIDLGR;TFLAVKPDGVQR;QMLGETQPLASKPGSIR	0;1;0;0	1	1	72611;72627;188717;266630;266632;266633;332898;332899;332901;334271;334272;334275	EED96374.1	nucleoside diphosphate kinase, partial [Thalassiosira pseudonana CCMP1335]	1.84408	1	0.184682	0.466755	1.21208	1	0.494751	0.788952	1.22113	1	0.687331	0.892178	0.817755	1	0.566443	0.856771	1.24134	1	0.555544	0.851758	0.946993	1	0.89791	0.977859	0.866697	1	0.634737	0.905881	0.662798	1	0.319968	0.707546	0.702899	1	0.165783	0.554611	1.4981	1	0.210779
713	EJK59471.1	341	517129	FFMEVR;DIVFHFK;ETQTNLLFLIR	0;1;0	1	1	52122;160690;201171	-	hypothetical protein THAOC_20301 [Thalassiosira oceanica]	0.705757	3	0.327167	0.645028	0.550734	3	0.117088	0.443263	0.823559	3	0.724928	0.903526	0.582076	3	0.00509949	0.0481114	0.79689	3	0.483652	0.813928	0.463994	3	0.20058	0.559758	0.931805	3	0.617338	0.902934	0.538027	3	0.0538946	0.261483	1.13456	3	0.59784	0.892299	1.41686	3	0.415158
714	XP_002290006.1	483	153081	QNYLDNSLR;GQGIASFGLASK;DYNDFNIDPTYFSQGPGNYR	0;1;0	1	5	132930;132936;223953;223954;223955;223961;223962;350240;350241;350242;350243;350244;361344;361345	EED93543.1	predicted protein [Thalassiosira pseudonana CCMP1335]	1.347	4	0.029597	0.14612	1.04385	5	0.624238	0.859509	1.653	5	0.00879912	0.0616435	1.15431	5	0.0744926	0.303015	0.80318	5	0.0206979	0.140512	0.78512	5	0.0860914	0.3538	0.982581	4	0.845615	0.966033	1.0124	4	0.90131	0.975726	1.10208	3	0.310569	0.712628	1.44267	5	0.0108989
715	EJK69967.1	482	140473	QNYLDNSLR;MYFLSADLTGQSYDMGR;DYNDFNIDPTYFSQGPGNYR	0;1;0	1	9	132930;132936;316254;316255;316256;318144;318145;318146;318151;318152;319956;350240;350241;350242;350243;350244;361344;361345	-	hypothetical protein THAOC_08721 [Thalassiosira oceanica]	1.13146	8	0.140686	0.407582	0.946425	5	0.344966	0.687641	1.10763	9	0.484852	0.775406	1.01722	9	0.885111	0.965985	0.761715	9	0.089791	0.35502	0.731175	9	0.0507949	0.248453	0.821603	9	0.0671933	0.347551	0.790609	9	0.10489	0.390893	1.05001	9	0.50285	0.850056	1.17829	8	0.060094
716	EJK63072.1	390	106052	CAACTGLGIAYAGSAR;LMTPDNEWLYK;SATSSMTSVPKPLK	0;1;0	1	3	259184;281361;281367;281370;325940;327526	-	hypothetical protein THAOC_16289 [Thalassiosira oceanica]	0.981597	3	0.906809	0.979399	1.05863	3	0.606339	0.858638	1.04658	3	0.790521	0.9233	1.14831	3	0.418958	0.763316	0.785011	3	0.194481	0.535789	0.693333	3	0.216178	0.581646	0.862135	3	0.441256	0.812127	0.769882	3	0.406359	0.782296	1.07795	3	0.429457	0.797753	0.942189	3	0.80072
717	EJK62163.1	935	93256.7	QAIGAITK;DLIMNSITCPR;VGFTSLASELCFSPVK	0;1;0	1	2	127846;127847;193738;193745;326338	-	hypothetical protein THAOC_17238 [Thalassiosira oceanica]	0.621305	2	0.0969903	0.319848	0.738405	2	0.118588	0.446505	0.653729	2	0.19928	0.504634	0.770399	2	0.286571	0.653673	0.824737	2	0.438856	0.78215	0.814387	2	0.462754	0.815801	0.90387	2	0.625337	0.902934	0.902195	2	0.70493	0.93588	1.07797	2	0.666033	0.911227	0.882506	2	0.557144
718	EED92042.1	1185	91356.7	DVVQGPGVTGR;VVVTSTYRPER;RFEIQTVGSSMK	0;1;0	1	4	17597;121336;121343;121344;190572;190573;190574;190576;276326;276329;279451;279458	XP_002290290.1	predicted protein [Thalassiosira pseudonana CCMP1335]	0.946311	4	0.571143	0.832977	0.839653	4	0.149885	0.509609	0.888514	4	0.346165	0.670757	0.788218	4	0.246375	0.604111	0.922494	3	0.534347	0.843246	1.07019	3	0.635436	0.896678	0.850969	4	0.0994901	0.436786	1.02564	4	0.880512	0.969879	0.855175	3	0.129587	0.492103	1.15466	4	0.265073
719	EED94967.1	678	67412.9	MFIASETSAFNR;GYGEPVAMEGALK;GADVIIITDKK	0;1;0	1	1	207596;207598;207599;211608;211617;264690;292313	XP_002287524.1	hypothetical protein THAPSDRAFT_39696 [Thalassiosira pseudonana CCMP1335]	1.11674	1	0.782822	0.931119	1.2279	1	0.464654	0.766062	1.11213	1	0.827417	0.938262	1.24378	1	0.536646	0.837691	0.854681	1	0.668933	0.912715	0.761244	1	0.515848	0.851244	0.888139	1	0.69573	0.926116	0.797796	1	0.575942	0.879475	1.02486	1	0.919308	0.981141	0.915962	1	0.769223
720	EJK55383.1	677	66512.7	MFIASETSAFNR;SAFLVVSQSGETK;GADVIIITDKK	0;1;0	1	1	207596;207598;207599;211608;211617;270749;292313	-	hypothetical protein THAOC_24891 [Thalassiosira oceanica]	0.835255	1	0.663334	0.875488	1.13068	1	0.663134	0.884231	0.889273	1	0.808819	0.930884	1.21762	1	0.573343	0.862385	0.861017	1	0.683732	0.915848	0.939047	1	0.881312	0.974912	0.956085	1	0.883112	0.978638	1.05625	1	0.89571	0.975365	1.0911	1	0.713629	0.926214	0.756728	1	0.363964
721	EED91645.1	934	65346.4	QAIGAITK;GVMPEFVNPK;VGFTSLASELCFSPVK	0;1;0	1	1	127846;127847;219617;326338	XP_002291538.1	predicted protein, partial [Thalassiosira pseudonana CCMP1335]	1.51803	1	0.337066	0.655684	0.859197	1	0.59504	0.851821	1.45227	1	0.460554	0.756115	0.821457	1	0.574143	0.862385	0.904966	1	0.783622	0.947965	0.877893	1	0.752525	0.940003	0.904965	1	0.740326	0.936461	0.886693	1	0.764724	0.94605	0.987097	1	0.955904	0.985468	1.76711	1	0.10039
722	XP_002293462.1	1689	62773.5	DLAILPR;TINSPEVLR;FEGSQLPSSVLR	0;1;0	1	1	45917;104899;193794	EED89198.1	receptor mediated endocytosis protein-like protein [Thalassiosira pseudonana CCMP1335]	0.599435	1	0.250375	0.557431	0.886616	1	0.671833	0.884231	0.512856	1	0.219078	0.525619	0.763387	1	0.450855	0.787643	1.80754	1	0.131187	0.445293	1.12189	1	0.783622	0.943972	1.6175	1	0.147385	0.524295	1.01888	1	0.966703	0.995461	0.894535	1	0.645335	0.907766	0.702852	1	0.261674
723	EJK51400.1	627	62543.8	TAVESACMILR;DLVQSCIGTK;MLLDPMGGIVITNDGNCILR	0;1;0	1	1	173429;220302;340436	-	hypothetical protein THAOC_29426 [Thalassiosira oceanica]	0.968194	1	0.939006	0.984222	1.19882	1	0.523448	0.806815	0.688838	1	0.462954	0.757293	0.887295	1	0.731127	0.907606	0.868276	1	0.70033	0.920975	0.625191	1	0.280472	0.657051	0.656708	1	0.19848	0.605117	0.465696	1	0.0891911	0.359964	0.771795	1	0.293471	0.697133	0.817703	1	0.512849
724	EED96518.1	625	62254.7	TAVESACMILR;GYNYALQEALEICEK;MLLDPMGGIVITNDGNCILR	0;1;0	1	1	173429;331810;340436	XP_002286877.1	t-complex protein 1 gamma subunit [Thalassiosira pseudonana CCMP1335]	1.09687	1	0.818218	0.948796	1.07169	1	0.79972	0.923173	0.909574	1	0.845615	0.939443	0.911353	1	0.789921	0.93279	1.11819	1	0.762024	0.942834	1.07046	1	0.871913	0.971791	0.970216	1	0.921408	0.984439	0.932773	1	0.865513	0.969879	0.879761	1	0.594241	0.890619	1.0236	1	0.937206
725	sp|Q9LKI7.1|TCPG_THAWE	626	62241.6	TAVESACMILR;LLPGGGATEMAVSVGLR;MLLDPMGGIVITNDGNCILR	0;1;0	1	1	173429;268173;340436	AAF81907.1	RecName: Full=T-complex protein 1 subunit gamma; Short=TCP-1-gamma; AltName: Full=CCT-gamma	0.71001	1	0.423058	0.728824	1.22797	1	0.464554	0.766062	0.485837	1	0.189981	0.489493	0.868429	1	0.688031	0.895186	1.47592	1	0.30147	0.674781	1.18756	1	0.682732	0.908525	1.06883	1	0.825817	0.960291	0.863561	1	0.714529	0.936167	0.737105	1	0.220878	0.623167	0.59594	1	0.126687
726	EJK72068.1	1298	59407.2	SMGSTVSAVLATAFK;DGFCIAGGGGVVVLEELEHAK;AMSNSFGFGGTNCALVFDKYEE	0;1;0	1	8	293778;293780;353822;353823;353825;353826;353827;353829;353830;353831;362532;362847	-	hypothetical protein THAOC_06442 [Thalassiosira oceanica]	1.3305	8	0.00049995	0.00763483	1.21805	8	0.0139986	0.115713	1.37217	7	0.00149985	0.0163711	1.27882	7	0.00059994	0.010199	1.01078	8	0.879112	0.975156	1.10516	8	0.266073	0.640284	1.15285	7	0.0222978	0.167933	1.24008	8	0.0334967	0.193124	1.07868	8	0.090491	0.416582	1.05518	8	0.365863
727	EJK73852.1	233	58174.9	ASTSSVLADLER;LVVNHLGK;IIVTSDCATIVK	0;1;0	1	1	33072;152409;264404	-	hypothetical protein THAOC_04502 [Thalassiosira oceanica]	1.16772	3	0.268173	0.580827	0.940755	3	0.788421	0.91766	1.09438	3	0.718028	0.898658	0.882394	3	0.607939	0.872362	0.978397	3	0.940106	0.99014	0.711491	3	0.415358	0.780234	0.956165	3	0.794421	0.955652	0.698279	3	0.273373	0.655221	0.972734	3	0.806919	0.950094	1.24274	3	0.483852
728	XP_002288542.1	378	51791.8	FVLDGVPR;KFGVNVK;IPDAAMTLAVAALFAEGPTTIR	0;1;0	1	1	69750;214211;342415	EED93978.1	predicted protein [Thalassiosira pseudonana CCMP1335]	1.58405	1	0.29587	0.613969	1.65617	1	0.10239	0.410927	1.3498	1	0.550045	0.823147	1.46153	1	0.309169	0.672042	1.00716	1	0.984302	0.994138	0.956161	1	0.914809	0.979701	0.898575	1	0.718628	0.93261	0.859654	1	0.70383	0.93588	0.887445	1	0.620138	0.899185	0.939487	1	0.835316
729	XP_002290124.1	35	47326.8	YEAAVCGGIPIIR;VLADIEALSWCK;YPTANSCINDIVALAK	0;1;0	1	3	218849;218851;218857;280545;280546;280551;327141;327146;327148	EED91876.1	predicted protein [Thalassiosira pseudonana CCMP1335]	1.04642	3	0.792221	0.936119	0.998124	3	0.984102	0.995041	1.2997	3	0.145385	0.423295	1.23596	3	0.126987	0.414876	0.703515	3	0.0455954	0.235032	0.679985	3	0.0365963	0.199616	0.906875	3	0.413859	0.797503	0.889759	3	0.518648	0.851346	1.25175	3	0.111989	0.462339	1.07355	3	0.543746
730	BAN33715.1	601	46003.4	IGGIGTVPVGR;QTVAVGVIK;IPIQDVYK	0;1;0	1	1	104086;163479;182845	-	elongation factor 1alpha, partial [Detonula confervacea]	0.702701	3	0.472753	0.769795	0.675131	3	0.374463	0.704603	0.63208	3	0.535246	0.81143	0.618652	3	0.50015	0.814156	1.19402	3	0.206279	0.554703	0.984757	3	0.946605	0.987035	1.13021	3	0.387061	0.778447	0.942217	3	0.740326	0.937781	0.942558	3	0.784422	0.945559	1.05801	3	0.631637
731	EJK76877.1	424	41819.3	AVAYLIPFMEK;FEIVMAGLK;MFLPQVIK	0;1;0	1	2	20929;256685;41228;191971;182866	-	hypothetical protein THAOC_01331 [Thalassiosira oceanica]	0.908839	2	0.80152	0.942608	0.963645	2	0.847215	0.945175	1.01537	2	0.976902	0.987873	1.09642	2	0.711529	0.90383	0.70806	2	0.169183	0.503075	0.460855	2	0.0140986	0.100306	0.82309	2	0.363064	0.750611	0.537872	2	0.114489	0.412985	1.12569	2	0.491851	0.846397	0.932801	2	0.835016
732	EJK70830.1	315	35525.2	ADEIFGWLK;NQYAGINFIDTYHR;GIFISFGNASGAVPAFPVLR	0;1;0	1	6	209936;209937;209938;209939;280961;280964;280968;323113;323116;323120;323651	-	hypothetical protein THAOC_07781, partial [Thalassiosira oceanica]	1.10641	6	0.337466	0.655684	1.10313	6	0.267773	0.64337	1.10226	5	0.324868	0.654862	1.18	6	0.0775922	0.310424	0.965751	6	0.812419	0.95334	0.949597	6	0.757924	0.940223	1.05635	6	0.657634	0.912677	1.0543	6	0.729227	0.936649	1.10638	5	0.0968903	0.429563	0.943651	5	0.394461
733	EJK70557.1	778	35480.8	ILTSASSNELPR;TTYYVDEVDEDKRPFR;IFGGHVGEYMEYLEEEDNTK	0;1;0	1	2	185204;185229;185230;347953;360142;365978	-	hypothetical protein THAOC_08069 [Thalassiosira oceanica]	0.65876	6	0.00539946	0.0424883	0.933678	6	0.206679	0.580898	0.533129	6	0.00659934	0.0499387	0.764981	6	0.0349965	0.187667	1.01075	6	0.934807	0.989245	0.881768	6	0.333467	0.71437	0.861513	6	0.0272973	0.188257	0.754204	6	0.00319968	0.0373548	0.852376	6	0.0652935	0.366132	0.773426	5	0.00559944
734	EJK64041.1	1066	34443.7	YLSGVGVAK;DVMDLLLLTQYFDCVR;SQLPTLELDAVFEAK	0;1;0	1	2	156877;156878;156879;156894;156896;156905;156906;171082;323224;317462;317468;317469;317481	-	hypothetical protein THAOC_15265 [Thalassiosira oceanica]	0.60583	2	0.363564	0.681729	0.825037	2	0.319368	0.680475	0.374061	2	0.176282	0.468958	0.537711	2	0.0230977	0.140615	1.24936	2	0.369463	0.738516	1.25681	2	0.411259	0.779227	0.850622	2	0.532147	0.869205	0.842301	2	0.529847	0.856895	0.73328	2	0.0791921	0.403812	0.771629	2	0.426357
735	EED94012.1	141	33583.7	GQGLGIAK;IWLTDAFR;QLVQQYAK	0;1;0	1	1	14584;102845;183532	XP_002288576.1	predicted protein [Thalassiosira pseudonana CCMP1335]	0.570095	1	0.214479	0.511231	0.595134	1	0.0970903	0.398535	0.473346	1	0.186881	0.483582	0.474862	1	0.0835916	0.321864	1.16822	1	0.671133	0.912715	0.54242	1	0.168983	0.518176	1.01841	1	0.953105	0.991148	0.45698	1	0.0826917	0.348583	0.907883	1	0.685531	0.916817	1.08595	1	0.783322
736	EJK71956.1	89	15421	FLDGIYVSEK;FVYSHFPINVTQNGNTVEIR;KFLDGIYVSEK	0;1;0	1	6	64776;232188;232189;232194;232195;227660;347829;347831;347833;347834;347835;310588;310589;310590;310591	-	hypothetical protein THAOC_06555 [Thalassiosira oceanica]	0.717034	6	0.0551945	0.228011	0.968451	6	0.820918	0.933402	0.676695	6	0.0646935	0.247374	0.934813	6	0.744426	0.913606	0.680458	5	0.0442956	0.232326	1.08935	6	0.724028	0.932892	0.90289	5	0.429557	0.806185	1.2913	5	0.137286	0.451765	0.974714	6	0.807219	0.950094	0.850448	5	0.0385961
737	EJK63233.1	977	130035	SLGASADWTR;GRPVLWTPGTDHAGIATQLQVEK	0;1	1	1	114863;114864;114874;114877;363171	-	hypothetical protein THAOC_16119 [Thalassiosira oceanica]	1.29054	1	0.545445	0.820763	1.46516	1	0.19648	0.5686	1.24387	1	0.662334	0.879856	1.47182	1	0.30227	0.667398	0.861334	1	0.685231	0.915848	1.09116	1	0.834817	0.960402	0.863349	1	0.625437	0.902934	1.10645	1	0.80092	0.953762	0.993141	1	0.975602	0.991578	0.86438	1	0.626237
738	EED95372.1	185	107605	VIHGGMLGAK;NELYYGQMSK	0;1	1	2	184997;185002;185003;185004;185006;189561;189564;189565;189567;246427;246439	XP_002287929.1	spermidine synthase [Thalassiosira pseudonana CCMP1335]	1.05292	2	0.852015	0.959809	1.05233	2	0.790921	0.918916	1.10888	2	0.757724	0.914754	1.12523	2	0.629237	0.885578	0.86545	2	0.59824	0.885061	0.826695	2	0.49525	0.841556	0.94182	2	0.772523	0.952107	0.908533	2	0.723028	0.936649	1.07456	2	0.676832	0.912573	1.00177	2	0.992501
739	EJK56445.1	184	104735	VIHGGMLGAK;VQWWFGDASK	0;1	1	3	184997;185002;185003;185004;185006;189561;189564;189565;189567;244421;244422;244423	-	hypothetical protein THAOC_23660 [Thalassiosira oceanica]	0.773995	3	0.147885	0.421945	1.00285	3	0.978402	0.993845	0.668062	3	0.0522948	0.216512	0.888738	3	0.409059	0.755251	0.790689	3	0.110389	0.404369	0.763549	3	0.213979	0.580062	0.719514	3	0.020498	0.160419	0.693844	3	0.0609939	0.284428	0.911769	3	0.331867	0.727373	0.792675	3	0.0728927
740	EJK46216.1	217	96748.5	IGQSLSIR;AEELSVLLTK	0;1	1	3	62697;215893;215894;215913	-	hypothetical protein THAOC_35124 [Thalassiosira oceanica]	0.819193	4	0.360264	0.678365	1.03925	4	0.774023	0.913546	1.04702	4	0.883312	0.951462	1.33282	4	0.0442956	0.220168	0.996007	4	0.976702	0.994138	0.914148	3	0.534147	0.856273	1.26461	4	0.0621938	0.334176	1.06523	4	0.794121	0.952951	1.22065	4	0.211379	0.615201	0.816159	4	0.173083
741	EJK63916.1	645	83790.9	AMFGEVYPDPVR;TLVLNLDIGADSK	0;1	1	1	209325;271798	-	hypothetical protein THAOC_15401 [Thalassiosira oceanica]	1.54841	2	0.123288	0.377076	1.26211	2	0.226577	0.60043	1.37419	2	0.333167	0.664399	1.15524	2	0.553545	0.848579	1.18257	2	0.49815	0.824445	1.13	2	0.660834	0.903421	1.08812	2	0.686331	0.924545	1.05194	2	0.853015	0.969291	0.923797	2	0.647035	0.907766	1.17594	2	0.449755
742	EJK43800.1	1372	83037.4	LPLGTLFDGR;DYIFVTESNVR	0;1	1	1	122470;199811	-	hypothetical protein THAOC_37719 [Thalassiosira oceanica]	0.745861	2	0.280572	0.598051	0.796757	2	0.235576	0.609051	0.640077	2	0.180182	0.474427	0.685229	2	0.127487	0.415429	1.19437	2	0.473253	0.80547	1.27099	2	0.558744	0.865488	1.07473	2	0.727327	0.934424	1.16118	2	0.717128	0.936167	0.899659	2	0.542346	0.867651	0.968905	2	0.881412
743	EJK61406.1	299	81107	AIFGSIER;WAELGTVYR	0;1	1	1	67318;124161	-	hypothetical protein THAOC_18112, partial [Thalassiosira oceanica]	1.1767	2	0.543046	0.820763	0.987174	2	0.947805	0.978972	0.728828	2	0.338666	0.667328	0.637056	2	0.0865913	0.32781	1.09015	2	0.728627	0.931304	1.11283	2	0.70243	0.919544	0.727886	2	0.145085	0.523162	0.726085	2	0.233077	0.610578	0.707	2	0.0524948	0.327071	1.18195	2	0.437356
744	EJK74079.1	1446	79472.9	EFNTGSFPK;MSGLSSLDTVK	0;1	1	2	196695;196697;196698;224434;228153	-	hypothetical protein THAOC_04269, partial [Thalassiosira oceanica]	1.10014	2	0.724328	0.901779	1.07943	2	0.689931	0.891223	1.30771	2	0.408059	0.71769	1.29052	2	0.29747	0.664463	0.798022	2	0.363564	0.732621	0.83793	2	0.524148	0.853043	0.981421	2	0.925907	0.984439	1.04655	2	0.867413	0.969879	1.19958	2	0.287871	0.692091	1.02878	2	0.894311
745	EJK49343.1	279	78967.2	IAMQTLDGGR;GISAFVVPMDAQGFSLGAK	0;1	1	2	119166;339117;339127	-	hypothetical protein THAOC_31787 [Thalassiosira oceanica]	1.10381	3	0.466253	0.765897	0.901006	3	0.343666	0.687641	1.1616	3	0.379362	0.695755	0.942445	3	0.756524	0.916783	0.988674	3	0.950805	0.990535	1.13892	3	0.550245	0.859515	1.06898	3	0.681832	0.923845	1.26478	3	0.29897	0.682061	1.07165	3	0.469753	0.830024	1.23051	3	0.138086
746	EJK67362.1	159	78524.9	NELSGALSGLTR;LELSTRPK	0;1	1	2	163009;163017;172536;172540	-	hypothetical protein THAOC_11616 [Thalassiosira oceanica]	0.49786	2	0.0226977	0.123943	0.455541	2	0.00079992	0.0161961	0.543185	2	0.0783922	0.27902	0.483573	2	0.010099	0.0791234	0.578546	2	0.0370963	0.209204	0.283916	2	0.00049995	0.00891	0.658941	2	0.060294	0.326895	0.32343	2	0.00069993	0.0134029	1.11472	2	0.531747	0.86667	1.16384	2	0.478052
747	EJK62564.1	665	65205.5	LIASGVVQTA;KGDIEVLMK	0;1	1	1	84751;267694	-	hypothetical protein THAOC_16820 [Thalassiosira oceanica]	0.908511	1	0.812719	0.945781	0.81113	1	0.454355	0.756266	0.982297	1	0.974403	0.986756	0.865709	1	0.682632	0.894917	0.726939	1	0.394661	0.755466	0.413855	1	0.0640936	0.291335	0.81282	1	0.49585	0.854656	0.462279	1	0.0864914	0.355055	1.09596	1	0.69873	0.92165	1.15195	1	0.635536
748	EJK63787.1	209	64615.7	LPFGIAQIGK;MEDIVSLCK	0;1	1	1	201257;213928	-	hypothetical protein THAOC_15540 [Thalassiosira oceanica]	2.00655	1	0.138586	0.403736	1.27261	1	0.390361	0.714868	1.41113	1	0.49635	0.779989	0.918338	1	0.808219	0.936576	0.905013	1	0.784322	0.947965	1.06311	1	0.885211	0.974912	0.670807	1	0.216578	0.633888	0.787709	1	0.556744	0.875117	0.748616	1	0.244676	0.642119	1.51206	1	0.20328
749	EJK51402.1	615	62968.1	GDLGVEIPFR;AEVTDVGSAVLDGADAVMLSGETAAGAYPIESLQAMR	0;1	1	1	126736;126737;370295	-	hypothetical protein THAOC_29428 [Thalassiosira oceanica]	0.437408	1	0.0907909	0.307529	0.812672	1	0.463254	0.765856	0.216902	1	0.0278972	0.139564	0.439258	1	0.0652935	0.279903	1.91211	1	0.106189	0.397162	2.19214	1	0.09999	0.384577	1.08421	1	0.790221	0.955652	1.2382	1	0.59574	0.889903	0.66661	1	0.118388	0.470417	0.615666	1	0.148585
750	EJK49823.1	1008	62470.3	IDYNYGSNR;TMPDCLGGGIGASSPVWMR	0;1	1	1	126239;320502	-	hypothetical protein THAOC_31270 [Thalassiosira oceanica]	0.980152	1	0.963604	0.98641	0.981039	1	0.948005	0.978972	0.946559	1	0.911009	0.960823	0.954897	1	0.90131	0.970516	1.24233	1	0.554445	0.851758	1.34964	1	0.478352	0.828714	1.24204	1	0.477152	0.845301	1.38028	1	0.425957	0.79701	0.996681	1	0.988401	0.997367	1.01526	1	0.958404
751	EJK49447.1	993	58255.2	GALHVNPWK;GICILSEFSSCTR	0;1	1	1	195566;244785	-	hypothetical protein THAOC_31674 [Thalassiosira oceanica]	0.802281	2	0.415758	0.722465	0.788783	2	0.219578	0.592335	0.979185	2	0.952405	0.974796	0.94072	2	0.805519	0.936576	0.753863	2	0.257874	0.618196	0.657741	2	0.274873	0.650158	0.938768	2	0.759224	0.943136	0.830691	2	0.559844	0.876278	1.20484	2	0.278172	0.682166	1.05867	2	0.791521
752	EJK76725.1	401	57369.2	GWDEGFASMK;GDNPHVYFDMK	0;1	1	1	221805;221807;267908	-	hypothetical protein THAOC_01498 [Thalassiosira oceanica]	1.00015	1	0.9998	0.9998	0.76672	1	0.344466	0.687641	1.77963	1	0.276672	0.596751	1.328	1	0.431357	0.777305	1.08697	1	0.815118	0.95334	0.753341	1	0.50165	0.84249	1.96083	1	0.0637936	0.339258	1.39946	1	0.406259	0.782296	1.72315	1	0.049995	0.317989	1.33128	1	0.352365
753	EJK73605.1	227	54113.3	DILSVILGGYGTK;SLAAGYAGVDNPVFLK	0;1	1	4	267471;267472;312943;312944;312945;312951	-	hypothetical protein THAOC_04758 [Thalassiosira oceanica]	1.10275	4	0.335166	0.653647	0.900916	4	0.177182	0.544223	0.934733	4	0.591041	0.840808	0.800196	3	0.111489	0.38409	1.54164	4	0.00949905	0.0791148	1.12836	4	0.274473	0.650067	1.36064	4	0.0304969	0.202563	0.973843	3	0.850815	0.96867	0.890876	4	0.128087	0.490547	1.23503	4	0.0361964
754	EJK65412.1	1038	51522.1	VLIATDLWGR;GRDVIAQSQSGTGK	0;1	1	1	139833;280398	-	hypothetical protein THAOC_13729 [Thalassiosira oceanica]	0.897087	2	0.688431	0.884845	0.871497	2	0.478652	0.770805	0.735493	2	0.356564	0.680458	0.722274	2	0.185681	0.523627	1.02262	2	0.926807	0.985949	0.961599	2	0.909209	0.977859	0.88081	2	0.549145	0.872208	0.819457	2	0.460254	0.822123	0.899509	2	0.541946	0.867651	1.05951	2	0.789321
755	EJK71722.1	470	50875.3	VAVLAGDYLLAR;ELQPFSDSIK	0;1	1	1	176735;176747;176748;230624	-	hypothetical protein THAOC_06810 [Thalassiosira oceanica]	1.29902	4	0.158984	0.43928	1.21341	4	0.0337966	0.210627	1.05685	4	0.679032	0.888771	0.932828	3	0.593941	0.865923	1.11752	4	0.352065	0.72137	1.20082	4	0.126187	0.440189	1.08019	3	0.516048	0.865197	1.08852	3	0.548845	0.869359	0.867936	4	0.127587	0.489674	1.02244	4	0.879512
756	EJK46458.1	772	48225.9	VGITDGFIR;VVYPGLASHPQK	0;1	1	3	90073;90074;259577;259581;259584	-	hypothetical protein THAOC_34874 [Thalassiosira oceanica]	0.942982	3	0.660334	0.872377	0.715899	3	0.029997	0.19585	1.79859	3	0.0262974	0.13455	1.32692	3	0.232077	0.592355	0.507281	3	0.00079992	0.013576	0.406323	3	0.00019998	0.0040905	0.984407	3	0.932107	0.985938	0.801331	3	0.306469	0.694152	1.84063	3	0.0104989	0.128559	1.35029	3	0.0454954
757	EED92389.1	517	44671.6	ANVLDVSQLWR;ELTGDVYFGTPK	0;1	1	5	188974;188975;188977;265605;265607;265613;265619;265624	XP_002290637.1	predicted protein [Thalassiosira pseudonana CCMP1335]	1.37544	5	0.00529947	0.0420689	0.845825	3	0.127687	0.462033	1.34428	4	0.0471953	0.200469	0.877976	5	0.120788	0.403328	0.923684	3	0.539746	0.843246	0.980835	4	0.856614	0.970589	0.978982	5	0.806419	0.955652	1.14623	5	0.118588	0.416099	1.06072	5	0.374063	0.762229	1.62066	5	0.0001
758	EJK75346.1	516	43433.8	ANVLDVSQLWR;ELRPETGLLK	0;1	1	1	188974;188975;188977;228645	-	hypothetical protein THAOC_02929 [Thalassiosira oceanica]	1.65728	1	0.255074	0.561912	0.826815	1	0.49895	0.790077	1.69866	1	0.312469	0.638046	0.849795	1	0.646035	0.889537	0.748721	1	0.430757	0.781166	1.05411	1	0.90171	0.977859	0.806367	1	0.480252	0.845301	1.14894	1	0.727927	0.936649	1.05849	1	0.810219	0.950094	2.04116	1	0.0528947
759	XP_002291132.1	925	41400.3	GWAFGLGLER;SGVDAFLCCGDVYR	0;1	1	1	127715;263223	EED91239.1	phenylalanine tRNA synthtetase-like protein, partial [Thalassiosira pseudonana CCMP1335]	1.64507	1	0.263274	0.573188	0.914957	1	0.750225	0.912141	1.36269	1	0.537446	0.81408	0.76078	1	0.445755	0.787157	0.88928	1	0.750325	0.942616	0.90846	1	0.819518	0.954161	0.772665	1	0.40086	0.788035	0.794249	1	0.570643	0.879475	0.863898	1	0.551345	0.876697	1.78472	1	0.0958904
760	EJK75726.1	338	40676.6	FDYFGMIER;SVASKPYSK	0;1	1	3	150300;150301;150302;155139;254682;254683;254684	-	hypothetical protein THAOC_02542 [Thalassiosira oceanica]	0.797664	7	0.00869913	0.0584919	0.80461	7	0.0174982	0.135521	0.65608	7	0.00379962	0.0330585	0.660861	7	0.0001	0.00261133	0.976071	7	0.79912	0.95303	0.804136	7	0.164684	0.51197	0.843627	7	0.0207979	0.161363	0.694297	7	0.00559944	0.0569435	0.866089	7	0.0729927	0.387856	1.02889	7	0.730127
761	EJK45103.1	26	39853	GSPLALAQAYETR;DVPTWLPDGTVLPCNLPR	0;1	1	2	208437;208438;208439;326700;326705	-	hypothetical protein THAOC_36301 [Thalassiosira oceanica]	1.05504	2	0.845915	0.957471	0.988574	2	0.953005	0.981884	1.51657	2	0.220278	0.526853	1.388	2	0.182382	0.51813	0.596463	2	0.0464953	0.236286	0.876804	2	0.635936	0.896678	0.840409	2	0.413659	0.797503	1.27548	2	0.365563	0.743519	1.3202	2	0.111189	0.462339	1.05529	2	0.80112
762	EED94772.1	1237	39330.8	TPSLIFEHVNNTDFK;FVTNDNQHLISEEAIDFVSK	0;1	1	1	328231;359233	XP_002287329.1	hypothetical protein THAPSDRAFT_39539 [Thalassiosira pseudonana CCMP1335]	0.756075	1	0.507549	0.796693	0.768549	1	0.348165	0.689554	1.03393	1	0.947705	0.974211	1.02672	1	0.945005	0.981499	0.911716	1	0.79592	0.95303	0.686472	1	0.380962	0.75851	1.27342	1	0.428657	0.806185	0.977863	1	0.958404	0.992593	1.34679	1	0.231677	0.631563	1.02791	1	0.925407
763	EED96360.1	115	38675.4	SYAFLSGPSFAR;GIETSSLGFMADILK	0;1	1	1	189409;189416;308010	XP_002286719.1	predicted protein, partial [Thalassiosira pseudonana CCMP1335]	1.33311	1	0.49585	0.78448	0.934441	1	0.80402	0.925187	1.34292	1	0.555144	0.826294	0.941775	1	0.866213	0.956266	0.733505	1	0.405559	0.760623	0.77037	1	0.535146	0.856273	0.769799	1	0.394561	0.783031	0.814641	1	0.611839	0.896688	1.03382	1	0.890311	0.974793	1.42331	1	0.261074
764	EJK67845.1	1175	38034.4	IVPGYVSTEVDAR;LAATWEGIQAAK	0;1	1	1	215555;252130	-	hypothetical protein THAOC_11060 [Thalassiosira oceanica]	1.15974	2	0.687831	0.884845	1.02019	2	0.918008	0.970804	1.85365	2	0.0755924	0.271018	1.61537	2	0.0608939	0.271822	1.28244	2	0.316168	0.693643	1.09361	2	0.750525	0.940003	2.08851	2	0.00339966	0.0430943	1.83599	2	0.0349965	0.198718	1.56875	2	0.0158984	0.164555	1.15043	2	0.511749
765	EJK63419.1	1207	37209.4	WCPVAVATYR;LNYLAAEVEK	0;1	1	1	164600;227279	-	hypothetical protein THAOC_15929 [Thalassiosira oceanica]	0.844602	2	0.527147	0.809745	0.921795	2	0.69783	0.894374	0.855242	2	0.636836	0.865617	0.937311	2	0.794321	0.93476	1.021	2	0.932507	0.988504	0.840359	2	0.529747	0.856273	1.07268	2	0.734327	0.934892	0.892457	2	0.671833	0.921722	1.03905	2	0.824718	0.957703	0.943075	2	0.786021
766	XP_002288814.1	664	36307.2	LIASGVVQTA;NNLAAALCK	0;1	1	1	84751;182560	EED94250.1	predicted protein [Thalassiosira pseudonana CCMP1335]	0.877571	1	0.744926	0.907484	1.19313	1	0.533247	0.812953	0.699543	1	0.483752	0.775406	0.990371	1	0.980002	0.995112	0.951861	1	0.888311	0.978479	1.28911	1	0.547945	0.859515	0.800169	1	0.463154	0.83327	1.08945	1	0.829917	0.961913	0.852895	1	0.519048	0.861993	0.750292	1	0.349965
[truncated: 1,007 more rows]
[truncated: 21 more columns]
