# Supplementary material for: Comparative Proteomic Analysis Reveals New Insights Into the Common and Specific Metabolic Regulation of the Diatom Skeletonema dohrnii to the Silicate and Temperature Availability
Source: Front Plant Sci. 2020 Nov 5;11:578915. doi: 10.3389/fpls.2020.578915 (PMC7674209; doi:10.3389/fpls.2020.578915)
Supplement: Supplementary Table 2 — Identification of down and up-regulated proteins in silicate and temperature limited conditions. [file Table_2.XLSX]

## Sheet: Down-regulation
Title :	Comparative proteomic analysis reveals new insights into the common and specific metabolic regulation of diatom Skeletonema dohrnii to the silicate and temperature availability
Authors :	Satheeswaran Thangaraj, Mario Giordano and Jun Sun*
Table S1	Downregualted proteins observed in lower silicate cells
S. No	Protein_ID	Description	Mass	Protein_Coverage	Uniq_Pep_Num	Uniq_Spec_Num	Sameset	Mean_Ratio_Control-VS-Low silicate	SD_Control-VS-Low silicate	Quant_Num_Control-VS-Low silicate	Pvalue_Control-VS-Low silicate	Protein_ID	Protein_Seqence	NCBInr Identity	NCBInr E-value	NCBInr Accession	NCBInr Description	Swissprot Identity	Swissprot E-value	Swissprot Accession	Swissprot Description	Tremble Identity	Tremble E-value	Tremble Accession	Tremble Description	Protein_or_Domain	COG Score	COG E-value	COG ID	COG Function-Description	COG Code	COG Function-Categories	KEGG(ko_id|rank|evalue|score|identity|ko_definition)	GO Biological_Process	GO Molecular_Function	GO Cellular_Component
1	EJK76876.1	hypothetical protein THAOC_01330, partial [Thalassiosira oceanica]	77462.3	0.071	1	2	-	0.66	0.116	4	0.01713	EJK76876.1	EKVRICKRSYDVLVNKVKFPPEDIVFDPNVLTIGTGMEEHANYGVDFINATKIIKEQCPYVKISGGISNLSFGFRGVMKIRESIHSVFLQHAIVESGMDVGIVNAHEMIAYDDLEEDMKELCENLVFNKTEDATDEMLTRTAYERACIDARKKGLPLPRKPRGKIKNYPRKQFAYDNVEPKPATEPPLPTSDAAQNHVPNHYCNSRITHEKIEAIRAKSTLLSKPNIDYAQPADKYPESFPHFVRGRDSLREYITSLFTSRIAIYDGAMGTMIQNYGKRNKLEEEEYRGERFKDWSCNTKGNNDQLSITQPHVIQGIYKAYLEEGGSDLIGTNTFSSTTIAMADYEMEDYVYELNYESARLAREACDEVTAKDPSKPRFVVGAIGPTNRTGSISPSVED…	100	0	gi|397645541|gb|EJK76876.1|	hypothetical protein THAOC_01330, partial [Thalassiosira oceanica]	55.09	4e-156	sp|Q54P92|METH_DICDI	Methionine synthase OS=Dictyostelium discoideum GN=mtr PE=3 SV=1	100	0	tr|K0TN53|K0TN53_THAOC	Uncharacterized protein (Fragment) OS=Thalassiosira oceanica GN=THAOC_01330 PE=4 SV=1	gi|338214662|ref|YP_004658725.1|	491	6e-157	COG1410	Methionine synthase I, cobalamin-binding domain	E	Amino acid transport and metabolism	K00548|1|0.0|630|bpg:Bathy07g01400| 5-methyltetrahydrofolate--homocysteine methyltransferase [EC:2.1.1.13]	GO:0042558//pteridine-containing compound metabolic process;GO:0009086//methionine biosynthetic process;GO:0032259//methylation	GO:0008705//methionine synthase activity;GO:0031419//cobalamin binding;GO:0008898//S-adenosylmethionine-homocysteine S-methyltransferase activity;GO:0008270//zinc ion binding	GO:0005622//intracellular
2	EED94012.1	predicted protein [Thalassiosira pseudonana CCMP1335]	33583.7	0.077	1	1	XP_002288576.1	0.56	0.12	4	0.01139	EED94012.1	MSTYSDYFVVSQKNGLSQFQTMTAYLGGSAFQTVLDNPVTAYRQLVQQYAKDAAGKAVDPKIATSEATAVFKANPVGACLSGLVPRIIGVGFKRVPKFGILLGLSFFLGEDGTISATAAFGASVLSAPFINPIRMIEKQQRAYFKTTGVEKPIMEILRESARHNFVPLFRGTVPLMGHSLASALLGLAGQPKLQKYIKEELSHHGIGNFTSGLLASAAVTPIYVGVTNPLSRLEVIMQTSKIDGKAIGLTEACKEMVTDSKQFGLRGVFRGQGLGIAKGILSLTAFHQGRIWLTDAFRNHNISNGSYTPVGSA	100	0	gi|223997806|ref|XP_002288576.1|	predicted protein [Thalassiosira pseudonana CCMP1335]	-	-	-	-	100	0	tr|B8BWD2|B8BWD2_THAPS	Uncharacterized protein OS=Thalassiosira pseudonana GN=THAPSDRAFT_3932 PE=4 SV=1	-	-	-	-	-	-	-	-	-	-	-
3	XP_002296160.1	predicted protein [Thalassiosira pseudonana CCMP1335]	23943.8	0.056	1	3	ACI64877.1;EJK50853.1;EJK73644.1	0.7	0.154	4	0.04205	XP_002296160.1	MNLLRILLLAASLSSSLASDWSNDGYGNDQGYYGSGGYDDSMGEYFDKGAAQPAENNLMKMAAGSAFGWFLGGKIHSKRTVTKLKKKHASERAAFVQLYREQVGALQEFNKESARIIQAMESSIIARQQGVPAEIDTVPFFMADTDGSKKISKAEFDRYVREYLANYPGLKPEDIPKWESFDHDRSGTITFDEYNQQMMKEIKKAQYRAAKNY	100	6e-127	gi|224005018|ref|XP_002296160.1|	predicted protein [Thalassiosira pseudonana CCMP1335]	-	-	-	-	100	1e-125	tr|B5YMV4|B5YMV4_THAPS	Predicted protein OS=Thalassiosira pseudonana GN=THAPS_23452 PE=4 SV=1	-	-	-	-	-	-	-	-		GO:0005509//calcium ion binding	-
4	EJK70352.1	hypothetical protein THAOC_08295 [Thalassiosira oceanica]	38438.9	0.068	1	1	-	0.64	0.055	4	0.001882	EJK70352.1	MSDSSEDAAATGPVAVAPDVVDVTIHPLVLLSAADHYHRVARGTRKRAVGVLLGSAAQGRVDATNSFAVPFEEDSKNSTVFYLDHNYLENMLHMIRKVHGNERVVGFYSTGPQIRPNDLRIHELVKRFVPANSITPPVFVIIDVRPDRESIPTTAYRVIEEVDSNVPRGGDSSGGAAEVRKTFAHVPSLIGAMEAEEVGVEHLLRDINDPTVSTVANLVKAKLSGLSTLTEKLVEMKDYLTAVSEGRMKPNPEIIANMQAIVNLLPNLNVDELVRSMLVKNNDMQMVIYLSALIRCVIALHDLVVNKIAYNDEVGDGMGGEPKDGKKKPAGKDSEEEKKEDDGDTKKKVSKK	100	0	gi|397631953|gb|EJK70352.1|	hypothetical protein THAOC_08295 [Thalassiosira oceanica]	52.82	2e-102	sp|Q9C774|PSD7B_ARATH	26S proteasome non-ATPase regulatory subunit 7 homolog B OS=Arabidopsis thaliana GN=RPN8B PE=1 SV=1	100	0	tr|K0TII5|K0TII5_THAOC	Uncharacterized protein OS=Thalassiosira oceanica GN=THAOC_08295 PE=4 SV=1	-	-	-	-	-	-	-	K03038|1|2e-104|312|crb:CARUB_v10014227mg| 26S proteasome regulatory subunit N8	GO:0051788//response to misfolded protein;GO:0006635//fatty acid beta-oxidation;GO:0043161//proteasome-mediated ubiquitin-dependent protein catabolic process;GO:0009407//toxin catabolic process;GO:0048825//cotyledon development;GO:0080129//proteasome core complex assembly;GO:0051510//regulation of unidimensional cell growth;GO:0010564//regulation of cell cycle process;GO:0042023//DNA endoreduplic…		GO:0005737//cytoplasm;GO:0008541//proteasome regulatory particle, lid subcomplex;GO:0005634//nucleus
5	EED89861.1	predicted protein [Thalassiosira pseudonana CCMP1335]	61980.4	0.021	1	2	XP_002292665.1	0.64	0.08	4	0.005388	EED89861.1	MGRFTTPIVCLLALLLQSTHGFSPAGRTGSLVCPVSTASSSVRFANKYDGKRSRLYMSEGGEAAALPPKKGFLEKIKSSMPPAKERKKLVPLAMMFFFILFNYTILRDTKDVLMVTAKKSGAEVIPFIKTYVNLPAAIGFTALYSKLCDKMEQKDVFYACTVPFLIFFLAFAFVIFPNVGALHPHAFVDKIALALPEGFGAPLAIVRNWSFAVFYVMAEMWGSVVASLLFWSFANEVTTVDEAKKYYPLFGLGANVALIFSGQYVRFVSKMRAGLPPGVDPWGVSLKYLMGAVVASGGCLISIFSYMQRKVMTDPECVDQEKQAAKKKKKRVKMGLRESAKFLMSSPYIKDLAMLVISYGMCINLVEVSWKSKLKAAYPDPNAYSAFMGNFSSATGSVT…	100	0	gi|224007411|ref|XP_002292665.1|	predicted protein [Thalassiosira pseudonana CCMP1335]	58.39	7e-180	sp|Q39002|TLC1_ARATH	ADP,ATP carrier protein 1, chloroplastic OS=Arabidopsis thaliana GN=AATP1 PE=1 SV=2	100	0	tr|B8C9I0|B8C9I0_THAPS	ADP,ATP carrier protein OS=Thalassiosira pseudonana GN=NTT1 PE=3 SV=1	gi|338732401|ref|YP_004670874.1|	518	2e-178	COG3202	ATP/ADP translocase	C	Energy production and conversion	K03301|1|0.0|613|gsl:Gasu_18950| ATP:ADP antiporter, AAA family	GO:0006810//transport	GO:0005471//ATP:ADP antiporter activity;GO:0005524//ATP binding	GO:0016021//integral component of membrane;GO:0009536//plastid
6	EED89177.1	RL6, ribosomal protein 6, partial [Thalassiosira pseudonana CCMP1335]	19595.4	0.079	1	2	XP_002293441.1	0.64	0.129	4	0.0197	EED89177.1	PSKGKSARYYPADDIPRPKHSRAKKHNAPKVRASLTPGTVCILLSGRFRGKRVVCLKALESGLLLVTGPYKINGVPLRRVNQAYVIATSTKVDVSGADVSKIDDAYFARVKSDSAEGEEEFFANDAAKPAVVSDQRKADQKKVDAAILKAVESTPLMKNYLGSNFSLKKHDRPHEMIF	100	1e-128	gi|224008965|ref|XP_002293441.1|	RL6, ribosomal protein 6 [Thalassiosira pseudonana CCMP1335]	56	2e-61	sp|P34091|RL6_MESCR	60S ribosomal protein L6 OS=Mesembryanthemum crystallinum GN=RPL6 PE=2 SV=1	100	3e-127	tr|B8CBR7|B8CBR7_THAPS	60S ribosomal protein L6 (Fragment) OS=Thalassiosira pseudonana GN=RL6 PE=3 SV=1	gi|156938048|ref|YP_001435844.1|	52	1e-07	COG2163	Ribosomal protein L14E/L6E/L27E	J	Translation, ribosomal structure and biogenesis	K02934|1|1e-67|208|sind:105175445| large subunit ribosomal protein L6e	GO:0006412//translation	GO:0003735//structural constituent of ribosome	GO:0022626//cytosolic ribosome;GO:0043231//intracellular membrane-bounded organelle;GO:0016020//membrane;GO:0044446//intracellular organelle part
7	EED96239.1	predicted protein [Thalassiosira pseudonana CCMP1335]	42396.6	0.033	1	3	XP_002286598.1	0.78	0.082	4	0.01704	EED96239.1	MSCSINSHSSTIHHNIITHHTSNIIIHNITPHVIHGRQLRLQSRQIRLRRFLLRRHNNVGSRWVAIVLDRDLSKNYNGEVWDASSYEAEEYNDEDEDEVGSMDHVSEEEHVLWEMHKDRVALTEDHVMWARKQNLYNDTFNMESMADVLWSHQLLSSDLQRTIGHVMCIDSPTIQHCRDALSNDPIVRSLLGVDSNGLCDASSIPLYRWRHIRDHTLRRDDGRDGLPNMLLAFDRPEAMSRGLRDEISNEHLEYLIRSERVIAAGPLHVATEEKSDPKSVAVGTLMLYNAKDREHAVEFVENDPAALAGLYESMTVHRYNSLDVTGKFVSENLYFPEQNTYQMKEAMGYWGYPVDDEQTKWLNW	100	0	gi|223993829|ref|XP_002286598.1|	predicted protein [Thalassiosira pseudonana CCMP1335]	-	-	-	-	100	0	tr|B8BT48|B8BT48_THAPS	Uncharacterized protein OS=Thalassiosira pseudonana GN=THAPSDRAFT_20629 PE=4 SV=1	-	-	-	-	-	-	-	-	-	-	-
8	EJK48998.1	hypothetical protein THAOC_32164 [Thalassiosira oceanica]	50983.7	0.073	1	1	-	0.56	0.124	4	0.01249	EJK48998.1	MANKAAKPQSKPQNHRSRISTVSIENYVETIADKHSSKKRKAENGEAEDSGGAQPMIEPSKHTPKLDTSNWPLLLKNYSDLHIRTSHYTPIPCGSSPLARNLKDHISSGVINLDKPANPSSHEVVSWIKRILRVEKTGHSGTLDPKVTGCLIVCVDRATRLVKAQQSAGKEYIGVVRLHSAIDDNKKLHRAVETLTGALFQRPPLISAVKRQLRIRTIYESKLIEYDDQRNLGIFWVSCEAGTYVRTLCVHLGLLVGTGGHMQELRRVRSGVMAEKDNLVTMHDVMDAQHVFDTTKDEKYLRRVVMPLEVLLTNYKRVVVKDSAVNAICYGAKLMIPGLLRFADDIDINQEVVLMTTKGEAIAVGIAQMTTAVMATCDHGVVAKIKRVIMERDTYPRRW…	100	0	gi|397574046|gb|EJK48998.1|	hypothetical protein THAOC_32164 [Thalassiosira oceanica]	73.18	0	sp|Q9LD90|CBF5_ARATH	H/ACA ribonucleoprotein complex subunit 4 OS=Arabidopsis thaliana GN=CBF5 PE=1 SV=1	100	0	tr|K0R6K1|K0R6K1_THAOC	Uncharacterized protein OS=Thalassiosira oceanica GN=THAOC_32164 PE=4 SV=1	gi|325958561|ref|YP_004290027.1|	285	1e-91	COG2016	Predicted ribosome-associated RNA-binding protein Tma20, contains PUA domain	J	Translation, ribosomal structure and biogenesis	K11131|1|0.0|593|cvr:CHLNCDRAFT_37236| H/ACA ribonucleoprotein complex subunit 4 [EC:5.4.99.-]	GO:0001522//pseudouridine synthesis;GO:0006396//RNA processing	GO:0009982//pseudouridine synthase activity;GO:0003723//RNA binding	GO:0030529//ribonucleoprotein complex
9	EED89940.1	RS2, ribosomal protein 2 [Thalassiosira pseudonana CCMP1335]	28822.3	0.252	2	6	XP_002292744.1	0.58	0.172	4	0.0326	EED89940.1	MSEERGGFGRGRGERGRGRGRGDRGRGRGRGRGREGGRDENVWVPVTKLGRLVKEGKIGSIEEIFLFSIPVKEAEIIDYFLKDKLQDEVMKIMPVQKQSSAGQRTRFKAFVAVGDAAGHIGLGVKCSSEVATAIRGAILAAKLNIAPVRRGYWGRKASAPHTVPTKVTGKCGSVRVRLIPAPRGTGLVSSPAGKRLLSMAGIEDCYTSTRGHTRTMGNFIKALFYALRNTYGYLEPDLWKENVLTAAPFQEHTDFLSKKQIK	100	3e-163	gi|224007569|ref|XP_002292744.1|	RS2, ribosomal protein 2 [Thalassiosira pseudonana CCMP1335]	72.69	8e-116	sp|P31009|RS2_DROME	40S ribosomal protein S2 OS=Drosophila melanogaster GN=RpS2 PE=1 SV=2	100	7e-162	tr|B8C8V8|B8C8V8_THAPS	RS2, ribosomal protein 2 OS=Thalassiosira pseudonana GN=RS2 PE=3 SV=1	gi|307595035|ref|YP_003901352.1|	186	3e-57	COG0098	Ribosomal protein S5	J	Translation, ribosomal structure and biogenesis	K02981|1|3e-112|327|csl:COCSUDRAFT_64056| small subunit ribosomal protein S2e	GO:0006412//translation	GO:0003735//structural constituent of ribosome;GO:0003723//RNA binding	GO:0005730//nucleolus;GO:0005886//plasma membrane;GO:0005618//cell wall;GO:0022627//cytosolic small ribosomal subunit;GO:0009507//chloroplast
10	EJK58157.1	hypothetical protein THAOC_21739 [Thalassiosira oceanica]	39484.9	0.043	1	2	-	0.62	0.089	4	0.006537	EJK58157.1	MSSRSPNPSWLMPTSYFGAPERAPRGSLLAPALIHGAGLAACLLAGVMVKRSREREALTDGAGGPLSLGGLWWGRYENVLTRLSQKIMSYVMNLAADLKFERALMASGHERPDGDVCPICYLYIGLPVERNARMNACCTKLVCNGCILAARQRGMLFDRCPFCRANLAVDEPSLLAMIRKRVDKRDAGAICFLGSLYEKEKLGLAKDVPRAIELWTEAADLGSIDAHYQLGCVYCTNEGAKEDKPRGIRHWKQAAIKGHSLSRHNLGCVEHQKGNYQIAVQHWMISAKMGHERSLNFIKEMFKEGCTTKAQYAEALLGYRDAVEEMKSPQREEAKRLGRLVYFANYLV	100	0	gi|397602365|gb|EJK58157.1|	hypothetical protein THAOC_21739 [Thalassiosira oceanica]	28.07	1e-08	sp|P77234|YBEQ_ECOLI	Sel1-repeat-containing protein YbeQ OS=Escherichia coli (strain K12) GN=ybeQ PE=4 SV=2	100	0	tr|K0SI35|K0SI35_THAOC	Uncharacterized protein OS=Thalassiosira oceanica GN=THAOC_21739 PE=4 SV=1	gi|189502235|ref|YP_001957952.1|	71.2	1e-11	COG0790	TPR repeat	T	Signal transduction mechanisms	K14026|1|1e-06|54.3|olu:OSTLU_27845| SEL1 protein	-	-	-
11	EJK67362.1	hypothetical protein THAOC_11616 [Thalassiosira oceanica]	78524.9	0.029	1	2	-	0.39	0.143	4	0.01332	EJK67362.1	MDGVGGGDVDGMAEAMEDLSLEEENKSEMTHLWDMTRPLVGNVSKIEFLKFDDDGDAKTTFWHSSAHILGEALEHVFGSRLTIGPPLAGGFYYDSFMGDAESGGALTESDYKIVEQEFQKIVKSKQKFERLVVTKDEALEMFEGNPFKTQIISTKVPDGSRTTVYRCGDLVDLCRGPHLPHTGRVKAFAATRHSATNWLGDTDNDMLQRMYGISFPDKKMLKVWKENQEKVRINHLLAYESSLLWMEIGRGPTQTYHCVGCFRNSCTTRPHAQLLIPIQAKERDHRRIAAKQDLIMFHDLSAGSAFWLPHGARIYNKLCDFIRSHYWKRGFTEVITPNVYNLDLWNTSGHAQHYKDAMFCFDVEGKEWAMKPMNCPGHCLMFGSKLRSYRDLPIRYADF…	100	0	gi|397624370|gb|EJK67362.1|	hypothetical protein THAOC_11616 [Thalassiosira oceanica]	52.94	0	sp|Q9D0R2|SYTC_MOUSE	Threonine--tRNA ligase, cytoplasmic OS=Mus musculus GN=Tars PE=1 SV=2	100	0	tr|K0TA00|K0TA00_THAOC	Uncharacterized protein OS=Thalassiosira oceanica GN=THAOC_11616 PE=3 SV=1	gi|338731942|ref|YP_004670415.1|	494	1e-165	COG0441	Threonyl-tRNA synthetase	J	Translation, ribosomal structure and biogenesis	K01868|1|0.0|696|sind:105160513| threonyl-tRNA synthetase [EC:6.1.1.3]	GO:0006435//threonyl-tRNA aminoacylation	GO:0004829//threonine-tRNA ligase activity;GO:0005524//ATP binding	GO:0005737//cytoplasm
12	EJK46845.1	hypothetical protein THAOC_34470 [Thalassiosira oceanica]	68651	0.144	4	20	-	0.43	0.04	4	0.0003602	EJK46845.1	MKLLRVRSTDVLGGNDSGKTTLMRSIANNSVEGFPDSSDVRTVFVEADIQGEQSHLSCIDYVFVDEKIQALGCTKEQVKEMLATVGFVPDGKAKPDHAVSTLSGGWRMKLALARAMLQKADILLLDEPTNHLDVINVAWVKKYINSLTNVTCIMVSHDSGLLNDCCTNILQIENLKLHPYKGNLDEFVKVKPSARSYFSFTESKMKFKFPQPGPIEGVKSKGKALMKMSKCTFTYPCNEKPTLFDISVQVSLSSRVACVGENGAGKSTMIKLLVGEIEPQVGDVWKHPNARIAYVAQHAFHHIESHLSKTPNEYIRWRYANDGEDKESLVKVTMQYTEEEKKLQSTPYQIQFVDEESGKITKVKKVVAELVGGRKTNKQKDYEYEVRYAGSTQDSGEYL…	100	0	gi|397569601|gb|EJK46845.1|	hypothetical protein THAOC_34470 [Thalassiosira oceanica]	48.24	7e-172	sp|Q08972|NEW1_YEAST	[NU+] prion formation protein 1 OS=Saccharomyces cerevisiae (strain ATCC 204508 / S288c) GN=NEW1 PE=1 SV=1	100	0	tr|K0R3G4|K0R3G4_THAOC	Uncharacterized protein OS=Thalassiosira oceanica GN=THAOC_34470 PE=4 SV=1	gi|339481983|ref|YP_004693769.1|	145	3e-35	COG0488	ATPase components of ABC transporters with duplicated ATPase domains	R	General function prediction only	K03235|1|0.0|714|bpg:Bathy05g04000| elongation factor 3	GO:0006200//ATP catabolic process;GO:0006414//translational elongation	GO:0003746//translation elongation factor activity;GO:0005524//ATP binding;GO:0016887//ATPase activity	-
13	XP_002295558.1	protein translocase complex subunit [Thalassiosira pseudonana CCMP1335]	52618.7	0.063	3	4	ACI64275.1;EJK49661.1	0.56	0.126	4	0.01317	XP_002295558.1	MRFLHLIRPMMCVLPEVQNPDRKIPFREKVLWTTITLFIFLVCCQIPIYGVQSAKSSDPFYWMRVILASNRGTLMELGISPIVTSGLVMQLLAGSRIIEVNYNVKEDRALFAGAQKLFGILITVGEAIAYVVSGMYGDLGSIGAGNALLIIAQLFCSGLIVLTLDELLQKGYGLGSGISLFIATNICENIVWKAFSPTTINTGRGTEFEGAIIALFHLLITRNDKVRAIKEALNRQNLPNLTNLAATMFVFVVVIYFQGWRVVLPVKYQKYRGQEGTYPIKLFYTSNMPIILQTALVSNLYFVSQLLYNRAPTNILVRILGKWQDVEGGGQTIPVGGIAYYISPPTSFAEIIYDPFHAVFYLVFILTACALFSKTWIEVSGASARDVAKQLRDNQMVMK…	100	0	gi|224011567|ref|XP_002295558.1|	protein translocase complex subunit [Thalassiosira pseudonana CCMP1335]	70.13	0	sp|Q54XK2|SC61A_DICDI	Protein transport protein Sec61 subunit alpha OS=Dictyostelium discoideum GN=sec61a PE=3 SV=1	100	0	tr|B5YLQ8|B5YLQ8_THAPS	Protein translocase complex subunit OS=Thalassiosira pseudonana GN=SEC61-1 PE=3 SV=1	gi|408402825|ref|YP_006860808.1|	316	3e-101	COG0201	Preprotein translocase subunit SecY	U	Intracellular trafficking, secretion, and vesicular transport	K10956|1|0.0|739|smo:SELMODRAFT_271933| protein transport protein SEC61 subunit alpha	GO:0015031//protein transport	GO:0015450//P-P-bond-hydrolysis-driven protein transmembrane transporter activity	GO:0005886//plasma membrane;GO:0016021//integral component of membrane;GO:0005739//mitochondrion
14	EED95751.1	propionate coa-transferase [Thalassiosira pseudonana CCMP1335]	47372	0.023	1	1	XP_002286110.1	0.49	0.077	4	0.002776	EED95751.1	MLGDLATSNRIEAWTLPMGSISRMIRAQGTHSPGHITTVGLGTYVDPTPGVGTGGAANQLALDSPLNQELVTKLSIMGSDYLMYKALPIQVAIIRATTADSSGNLSFEHESLLCDQKNIAMAARNSGGVVLAQVKRLCAVGSLPSRSVGVPGAMVDCVCVVDEEDHDVFHRMSYTKRHDPVLCGEIKSPSDEVPKMPLDERKVIARRASFALKPGKVVNLGIGLPEGVASVAGEEGQLPFITLTTEPGVFGGLPASCQEFGPAVNADALVEMNQMFDYYDGGGLDMCFLGAAQISPQGDVNVSRMSQKKLIGPGGFINISQCTRNISFLCTFTAKGLSVDIDGDKGNLSIATEGKVKKFVNKVFETTFAGDEAVRRGQRVYYVTERAVFRRTANHRTIE…	100	0	gi|223992853|ref|XP_002286110.1|	propionate coa-transferase [Thalassiosira pseudonana CCMP1335]	41.57	1e-104	sp|F1CYZ5|CARA_ACEWO	Caffeate CoA-transferase OS=Acetobacterium woodii GN=carA PE=1 SV=1	100	0	tr|B8BQA9|B8BQA9_THAPS	Succinyl-CoA:3-ketoacid-coenzyme A transferase OS=Thalassiosira pseudonana GN=THAPSDRAFT_174 PE=3 SV=1	gi|89899577|ref|YP_522048.1|	404	6e-134	COG4670	Acyl CoA:acetate/3-ketoacid CoA transferase	I	Lipid transport and metabolism	-	GO:0046952//ketone body catabolic process	GO:0008260//3-oxoacid CoA-transferase activity	GO:0005739//mitochondrion
15	XP_002296702.1	predicted protein [Thalassiosira pseudonana CCMP1335]	25251.8	0.044	1	1	EED86903.1	0.35	0.119	4	0.008195	XP_002296702.1	MAASTEHWSEDLFGPKILKKPKTTGVPTVSALKGKKLVALYFSASWCPPCKSFTPLLIDFYNANKEDLEIIFLSSDRDEESFNGYFGKMPWLSSIPGYSSQEANGRQKKLASMFQIQGIPSLIILDAKTGNFITDNARITVMQASNPTSKKELLQTWLTTEAVPIDDAVMGASNGGGGVGSWIGSILMFFARKPMYLFGLLYFAKQGLRYLERLGQEEEGEGDGKEEL	100	9e-137	gi|224014078|ref|XP_002296702.1|	predicted protein [Thalassiosira pseudonana CCMP1335]	47.32	4e-25	sp|Q7Y0F2|NRX12_ORYSJ	Probable nucleoredoxin 1-2 OS=Oryza sativa subsp. japonica GN=Os03g0405900 PE=2 SV=1	100	2e-135	tr|B8LCI0|B8LCI0_THAPS	Predicted protein OS=Thalassiosira pseudonana GN=THAPSDRAFT_25128 PE=4 SV=1	gi|294054895|ref|YP_003548553.1|	83.6	2e-18	COG0526	Thiol-disulfide isomerase or thioredoxin	O	Posttranslational modification, protein turnover, chaperones	K17609|1|9e-31|121|cre:CHLREDRAFT_182094| nucleoredoxin [EC:1.8.1.8]	-	-	-
16	EJK61374.1	hypothetical protein THAOC_18152 [Thalassiosira oceanica]	41022	0.038	1	1	-	0.77	0.115	4	0.03592	EJK61374.1	MLRFSPLYSFASSRPRNARKREKQTNKHRKVASLKQQIEDVRQQKQSSSMGAVAASKGPLREIRKPIKMRRTLKGHFGKVYAMHWASDSQTLVSASQDGKLIIWNAYTTNKVQAIPLRSSWVMTCAFEQTKGDLIACGGLDNVCSIYNINQQTANARATTELVAHDGYLSCCRFIDEGHILTSSGDSSCIYWDVSSGDVLKTFTDHTSDVMSVAVSPNNPSVFVTGSVDTTAKIWDLRNAKCVQTHTGHDQDINTVAWFPDGNAFSTGSDDSSCRLFDMRSYGEVNKFKSDKISCGITSVAFSKSGRLLFGGYDDFNTYVWDTLSDSAQPMALPNPHENRVSCLGMNAKGDALCTGSWDTNLKIWA	100	0	gi|397611547|gb|EJK61374.1|	hypothetical protein THAOC_18152 [Thalassiosira oceanica]	54.9	2e-137	sp|P17343|GBB1_CAEEL	Guanine nucleotide-binding protein subunit beta-1 OS=Caenorhabditis elegans GN=gpb-1 PE=1 SV=2	100	0	tr|K0S8U8|K0S8U8_THAOC	Uncharacterized protein OS=Thalassiosira oceanica GN=THAOC_18152 PE=4 SV=1	gi|332661895|ref|YP_004451364.1|	151	4e-39	COG2319	WD40 repeat	R	General function prediction only	K04536|1|1e-107|323|cic:CICLE_v10028655mg| guanine nucleotide-binding protein G(I)/G(S)/G(T) subunit beta-1	-	-	-
17	EED93452.1	ran binding protein 7 [Thalassiosira pseudonana CCMP1335]	121365	0.01	1	2	XP_002289915.1	0.63	0.086	4	0.00621	EED93452.1	MAANNVNMDAVEALHVALQQSFSPDAGVRDPAEAAIKNLKYMSGATQMLLHITEEKQVQYEVRQAAAIQLKNICRECWVERVSYMGMALPSINGETNPDGTPKKSPVLSDEDKAVVKHKVIECLLSEPDKSIRDLMAETVHHIAVYDFPDTWPDLLPVLLQTISQNADPSQALRVHNALLALRKVCKRYEYKSREQRGPLNEIVMKSFPLLLPLAQRLTAPNEHSLEAALMLKQILKIFWSSTQFYMPGGSSNADGASSAPALANKEAMEPWFQVLKAVLSKPLPEASTGLEPRNQPTSKEERTAWPWWKVKKWAAQIMTRLFSRYGIPTYAEEEIKEFATYFSQNVAPQFLGPVCETLSLRSNGQFCTDRVVYYCLNFVDLAVELAETYKLLKPHMDF…	100	0	gi|224000485|ref|XP_002289915.1|	ran binding protein 7 [Thalassiosira pseudonana CCMP1335]	30.5	6e-127	sp|F4J738|SAD2H_ARATH	Importin beta-like SAD2 homolog OS=Arabidopsis thaliana GN=At3g59020 PE=1 SV=1	100	0	tr|B8C038|B8C038_THAPS	Ran binding protein 7 OS=Thalassiosira pseudonana GN=THAPSDRAFT_268746 PE=4 SV=1	-	-	-	-	-	-	-	K20223|1|2e-145|460|ppp:PHYPADRAFT_148110| importin-7	GO:0006886//intracellular protein transport	GO:0008565//protein transporter activity	GO:0005622//intracellular
18	EJK50574.1	hypothetical protein THAOC_30393 [Thalassiosira oceanica]	108113	0.017	1	1	-	0.69	0.156	4	0.04345	EJK50574.1	MPSTKSNACHVRHFFFGSSGGSGDDDDDSKDKDTPSDVKDSGKLEDKNDTNKKGGATSSKAGPSLNNSAKHRKVSPRRTSFSSSDIDGESPGPISDVMLPASSSRLGFGDQAPKYPHLLALPIARAPVFPGILTPLTVTDKATIKAVENTLDGAGYLGLFLRKDQPDVAKGLEKPEVITSEDDLYRVGTFAQIQRLTKANAIHGDGAPFAHEVESGGDDDEDDDNPASLLLMPHRRINLISVDGIGPPVDVTVSHWERLTYTRGKDSVRDDTIRALSQEVLATIREVAQLNSLFKEQVVNLVPSSHLFDMADPFRLADFAASLSNGNDVANLQAVLEEEDPELRLHKALELLSKEREVSKLQKEISAKVEEKMSEAQRKYFLTEQLKSIKKELGMEKDD…	100	0	gi|397577412|gb|EJK50574.1|	hypothetical protein THAOC_30393 [Thalassiosira oceanica]	62.62	0	sp|B7FSL4|LONM_PHATC	Lon protease homolog, mitochondrial OS=Phaeodactylum tricornutum (strain CCAP 1055/1) GN=PHATRDRAFT_18202 PE=3 SV=1	100	0	tr|K0REB5|K0REB5_THAOC	Lon protease homolog OS=Thalassiosira oceanica GN=THAOC_30393 PE=3 SV=1	gi|338733949|ref|YP_004672422.1|	687	0	COG0466	ATP-dependent Lon protease, bacterial type	O	Posttranslational modification, protein turnover, chaperones	K08675|1|0.0|753|bpg:Bathy04g01420| Lon-like ATP-dependent protease [EC:3.4.21.-]	GO:0006508//proteolysis	GO:0004252//serine-type endopeptidase activity;GO:0005524//ATP binding;GO:0004176//ATP-dependent peptidase activity	GO:0005739//mitochondrion
19	AFO84270.1	ribulose-1,5-bisphosphate carboxylase/oxygenase large subunit, partial (chloroplast) [Cyclotella striata]	36918.9	0.288	2	5	-	1.47	0.336	4	0.04725	AFO84270.1	VKDTDVLALFRITPQPGVDPVEAAAAVAGESSTATWTVVWTDLLTACERYRAKAYRVDPVPNATDQYFAFIAYECDLFEEASLSNLTASIIGNVFGFKAVAALRLEDMRIPHSYLKTFQGPATGIVVERERLNKYGIPLLGATVKPKLGLSGKNYGRVVYEGLKGGLDFLKDDENINSQPFMRWRERFLNCLEGINRASAATGEVKGSYLNVTAATMEDVYKRAEFAKTIGSVIIMIDLVMGYTAIQSIAYWCRENDMILHLHRAGNSTYARQKNHGINFRVICKWMRMAGVDHIHAGTVVGKLEGDPLMIKGFYDVLRLTELEVNLPFG	100	0	gi|398372919|gb|AFO84270.1|	ribulose-1,5-bisphosphate carboxylase/oxygenase large subunit, partial (chloroplast) [Cyclotella striata]	96.06	0	sp|A0T0N6|RBL_THAPS	Ribulose bisphosphate carboxylase large chain OS=Thalassiosira pseudonana GN=rbcL PE=3 SV=1	100	0	tr|K9LSX0|K9LSX0_9STRA	Ribulose bisphosphate carboxylase large chain (Fragment) OS=Cyclotella striata GN=rbcL PE=3 SV=1	gi|292493417|ref|YP_003528856.1|	554	0	COG1850	Ribulose 1,5-bisphosphate carboxylase, large subunit, or a RuBisCO-like protein	G	Carbohydrate transport and metabolism	K01601|1|0.0|563|cme:CymeCp013| ribulose-bisphosphate carboxylase large chain [EC:4.1.1.39]	GO:0019253//reductive pentose-phosphate cycle;GO:0055114//oxidation-reduction process	GO:0016984//ribulose-bisphosphate carboxylase activity;GO:0004497//monooxygenase activity;GO:0000287//magnesium ion binding	GO:0009507//chloroplast
20	EJK73267.1	hypothetical protein THAOC_05120 [Thalassiosira oceanica]	28282.2	0.149	3	7	-	1.98	0.533	4	0.016	EJK73267.1	MKFSALFAASALSTASAFAPVASNNRAATSLNVWGDKDYLIAPSILSADFAKLGQEVDNMLEAGADVVHFDVMDNHYVPNLTIGPMVCKALRDHGVTAPIDVHLMVSPVDAAIQDFIDAGASYITFHPEATNHIDRSLQLIKNGGCKAGLVFNPATSIDYCEFVKDKLDIILLMSVNPGFGGQAFIPATLDKAREARKFIDDNGLDCRLEIDGGVKVDNIKEVAEAGVNMMVAGSAILKEPRTKESYKETIDAMREQLAQV	100	1e-180	gi|397638882|gb|EJK73267.1|	hypothetical protein THAOC_05120 [Thalassiosira oceanica]	69.78	1e-113	sp|P0AG10|RPE_SHIFL	Ribulose-phosphate 3-epimerase OS=Shigella flexneri GN=rpe PE=3 SV=1	100	3e-179	tr|K0TN81|K0TN81_THAOC	Ribulose-phosphate 3-epimerase OS=Thalassiosira oceanica GN=THAOC_05120 PE=3 SV=1	gi|385333027|ref|YP_005886978.1|	349	2e-121	COG0036	Pentose-5-phosphate-3-epimerase	G	Carbohydrate transport and metabolism	K01783|1|4e-62|199|ccp:CHC_T00008270001| ribulose-phosphate 3-epimerase [EC:5.1.3.1]	GO:0006098//pentose-phosphate shunt	GO:0004750//ribulose-phosphate 3-epimerase activity;GO:0046872//metal ion binding	-
21	XP_002289813.1	RNA helicase, partial [Thalassiosira pseudonana CCMP1335]	50255	0.099	4	5	EED93350.1	0.71	0.099	4	0.01349	XP_002289813.1	LSHKGITHFTPVQAKAMSPVLAGRDVIGRSRTGTGKTLAFGMPALTRMVERAKEKGNLEQGRDGSTRMRKGRLPSMIVLCPTRELARQVEDELSAVCKPLGLFSSCFHGGVSYDPQARALRQGVDVIVGTPGRVIDHIDRGNLDLSECDTVVLDEADEMLNMGFAEDVEVILEGVGSKNREKTQCLLFSATTPPWVKEIGSHYQRDVLSIDITGEQTGSRVASTVRHTAIQVPFGADAKKAILEDIIALFGKTIVFTETKKEADELVSGSVFKTLSAQAIHGDIGQKQRDATLAAFRAGAFNVLVATDVAARGIDIKDVDLVIQFEPPRDVDTYVHRSGRTGRAGASGISVLLFQQNQARDIVRIEKSLGHGFKFELLGPPSTEAALNAAAKTSALACR…	100	0	gi|224000281|ref|XP_002289813.1|	RNA helicase [Thalassiosira pseudonana CCMP1335]	43.78	3e-109	sp|Q0DM51|RH3_ORYSJ	DEAD-box ATP-dependent RNA helicase 3, chloroplastic OS=Oryza sativa subsp. japonica GN=Os03g0827700 PE=2 SV=2	100	0	tr|B8BZG6|B8BZG6_THAPS	RNA helicase (Fragment) OS=Thalassiosira pseudonana GN=THAPSDRAFT_13254 PE=3 SV=1	gi|328949667|ref|YP_004367002.1|	301	2e-95	COG0513	Superfamily II DNA and RNA helicase	L	Replication, recombination and repair	K16911|1|7e-115|357|cme:CYME_CMF033C| ATP-dependent RNA helicase DDX21 [EC:3.6.4.13]		GO:0008026//ATP-dependent helicase activity;GO:0003676//nucleic acid binding;GO:0005524//ATP binding	GO:0009536//plastid
22	XP_002287516.1	metalloprotease, partial [Thalassiosira pseudonana CCMP1335]	62125.8	0.386	4	7	EED94959.1	0.55	0.065	4	0.002064	XP_002287516.1	RYSDFLKLVNGDKIEKVTFSADGTQLLGVDTDGTRIKLEALPNDPDLLTQLTSHKVDVTVLPSNEAAGGLGDLAQSLILPAALFAGLFFLSRRAGGGAGMGGMGGPGNPMGMGKSKAQIQMIPDTGVNFEDVAGCDGAKLELAEVVDFLKQPEVYSKNGCRIPRGVILDGPPGTGKTLLAKAVAGEAGVPFISISGSEFVEMFVGVGASRVRDVFSQAKKNAPCIIFIDEIDAVGRQRGAGFAGGNDEREQTINQILVEMDGFDGNPGIITIAATNRVDILDQALLRPGRFDRKITVDLPDFKGRTRILGVHARGKPLEPDVDLEAIGRRTPGFSGAQLENLMNEAAISAARIGKSTIGWEQIDGAVDRIMVGLEKKGGTAMLSAKQNELVAYHEAGHA…	100	0	gi|223995685|ref|XP_002287516.1|	metalloprotease [Thalassiosira pseudonana CCMP1335]	58.48	0	sp|P72991|FTSH3_SYNY3	ATP-dependent zinc metalloprotease FtsH 3 OS=Synechocystis sp. (strain PCC 6803 / Kazusa) GN=ftsH3 PE=1 SV=1	100	0	tr|B8BVM2|B8BVM2_THAPS	Metalloprotease (Fragment) OS=Thalassiosira pseudonana GN=ftsH PE=3 SV=1	gi|16329602|ref|NP_440330.1|	660	0	COG0465	ATP-dependent Zn proteases	O	Posttranslational modification, protein turnover, chaperones	K03798|1|0.0|732|ccp:CHC_T00009248001| cell division protease FtsH [EC:3.4.24.-]	GO:0030163//protein catabolic process;GO:0006508//proteolysis;GO:0006200//ATP catabolic process	GO:0008270//zinc ion binding;GO:0004222//metalloendopeptidase activity;GO:0016887//ATPase activity;GO:0005524//ATP binding	GO:0016020//membrane;GO:0009507//chloroplast;GO:0009579//thylakoid
23	EJK63655.1	hypothetical protein THAOC_15674 [Thalassiosira oceanica]	67454.4	0.013	1	1	-	0.69	0.169	4	0.04997	EJK63655.1	MIRRFLLPILAALAAPAEGSTGAGPRSIYPINQRFMAVADSSVDAILVVDANAGGSIVGHFVLHSRNVDSDHSKWLNPISISSCEDCKHLYLTSNNMSYKMALVRPLKDMADNYNFDDFKKSTIKFFWPSGWGQNPNDRQLKGVSIARDGSSAYVAHAEAVYSFDGMNPDDSDPKARKVITTEDAGINGELINNIHHTHSLKNLILTSDHYTSFVNILDDTDENPLDRDRVVAYQLPLDYHCNYLYDGVKMRFFDTAIVAGYYAFALGQATESEETDHPGVAIYRLTWDDDDEQWHSCVQIAGSGLEEAQWVDGMGYDARFSATAHQISVMPTDDYYLLLIGDTDNRAVRLVDVTTPTITDYVTEAAGVSSIAYNEDLYQVLYNKEKPWSALTPESVSK…	100	0	gi|397615817|gb|EJK63655.1|	hypothetical protein THAOC_15674 [Thalassiosira oceanica]	-	-	-	-	100	0	tr|K0SE88|K0SE88_THAOC	Uncharacterized protein OS=Thalassiosira oceanica GN=THAOC_15674 PE=4 SV=1	-	-	-	-	-	-	-	-	-	-	-
24	XP_002289514.1	20S proteasome subunit PAC1 [Thalassiosira pseudonana CCMP1335]	29555.5	0.096	2	11	EED93051.1;EJK61739.1	0.8	0.077	4	0.01769	XP_002289514.1	MARRYDSSTTTFSPEGRLHQVEYAIEAINNAGTSVGILARDGVVMASERKVTSGLLAPARTSEKTYKLCPHATCTVAGLTADANILIDQARLRAGRYAYQYQEPIPIENLVEHVCNYKQAYTQYGGLRPFGVAFLFAGYDEQHGFQLYQSDPSGNYSGWKATVIGANNQAGKSLLKADYGKKSEGDDEMKTDDNDASEEIEMPDVAEALRLAVKVLNKTMDGAVASADKLELFTMSLDDQGNCVHKILNAKEAEVVIKEVEAETATSGDT	100	0	gi|223999683|ref|XP_002289514.1|	20S proteasome subunit PAC1 [Thalassiosira pseudonana CCMP1335]	57.76	2e-96	sp|O81148|PSA4A_ARATH	Proteasome subunit alpha type-4-A OS=Arabidopsis thaliana GN=PAC1 PE=1 SV=1	100	0	tr|B8C0E7|B8C0E7_THAPS	Proteasome subunit alpha type OS=Thalassiosira pseudonana GN=PSA4 PE=3 SV=1	gi|530780336|ref|YP_008432142.1|	173	1e-51	COG0638	20S proteasome, alpha and beta subunits	O	Posttranslational modification, protein turnover, chaperones	K02728|1|3e-99|293|ppp:PHYPADRAFT_191155| 20S proteasome subunit alpha 3 [EC:3.4.25.1]	GO:0006511//ubiquitin-dependent protein catabolic process	GO:0004298//threonine-type endopeptidase activity	GO:0005737//cytoplasm;GO:0019773//proteasome core complex, alpha-subunit complex;GO:0005634//nucleus
25	EED92716.1	casein kinase-like protein [Thalassiosira pseudonana CCMP1335]	37347.9	0.271	7	16	XP_002289179.1	0.73	0.024	4	0.0003422	EED92716.1	MQSSISKYRITKRVGGGSFGDIYLGVGANGEKVAVKFEKHGARCPQLRHEYKVYRELQNAPGFAKVHYFGTQDSYNLMVMDLLGPSLEDQFNKCGRRFSLKTVLMIADQMLERVELMHSRHLIHRDIKPANFVTDGGRGSGNFIYCIDFGLSKRYRHPRTLQHIPQREGRSLTGTPRYASINNHLGVEQSRRDDLESIGYVLVYFLKGGLPWQGLKAKSATKKYKLIMEKKQSITIPALCQGCPSQFAEYLAYCRSLKFEAKPNIAYLRGMFRDLFRSQGYTNNNSSLDWDWNRIDTGTGADGRDRVAAPPGDMGGYGGDVGVDKGRY	100	0	gi|223999013|ref|XP_002289179.1|	casein kinase-like protein [Thalassiosira pseudonana CCMP1335]	55.97	6e-115	sp|Q6QNM1|KC1_TOXGO	Casein kinase I OS=Toxoplasma gondii PE=2 SV=1	100	0	tr|B8C149|B8C149_THAPS	Casein kinase-like protein OS=Thalassiosira pseudonana GN=THAPSDRAFT_22118 PE=3 SV=1	gi|262196658|ref|YP_003267867.1|	87.8	1e-17	COG0515	Serine/threonine protein kinase	T	Signal transduction mechanisms	K02218|1|9e-115|338|cre:CHLREDRAFT_137286| casein kinase 1 [EC:2.7.11.1]	GO:0006468//protein phosphorylation;GO:0048856//anatomical structure development	GO:0004674//protein serine/threonine kinase activity;GO:0005524//ATP binding	GO:0044424//intracellular part
26	sp|A0T0N1.1|RK19_THAPS	RecName: Full=50S ribosomal protein L19, chloroplastic	13784.8	0.242	1	1	EED86161.1;ABK20716.1;YP_874493.1;XP_002297521.1	0.3	0.207	4	0.03305	sp|A0T0N1.1|RK19_THAPS	MLNLDNQKAIDNLHQSFIKSDLPKIQIGDTLKLGIKIIEGNKERVQFYEGTVIAKKNSSINTTITVRKVLQGIGIERIFLIHSPKVASIEVIRHAKVRRSKLYYLRNLRGKASRLKQRFE	100	1e-81	gi|118411099|ref|YP_874493.1|	50S ribosomal protein L19 [Thalassiosira pseudonana]	100	2e-82	sp|A0T0N1|RK19_THAPS	50S ribosomal protein L19, chloroplastic OS=Thalassiosira pseudonana GN=rpl19 PE=3 SV=1	100	2e-80	tr|B8LES2|B8LES2_THAPS	RK19, ribosomal protein 19 50S large ribosomal subunit, chloroplast, translation, protein biosynthesis OS=Thalassiosira pseudonana GN=RK19 PE=3 SV=1	gi|16330014|ref|NP_440742.1|	162	3e-51	COG0335	Ribosomal protein L19	J	Translation, ribosomal structure and biogenesis	K02884|1|1e-21|86.3|mdm:103432807| large subunit ribosomal protein L19	GO:0006412//translation	GO:0003735//structural constituent of ribosome	GO:0005840//ribosome;GO:0009507//chloroplast
27	XP_002291480.1	RS26, ribosomal protein 26 40S small ribosomal subunit, partial [Thalassiosira pseudonana CCMP1335]	11060	0.223	2	2	EED91587.1;EJK48154.1	0.8	0.099	4	0.0333	XP_002291480.1	NHGRNKHGRGHVKRVRCASTGKAIPKDKAIKRFIVRNIVDASSLRDIKEASAYQEYQLPKLYLKMYYCVEAAVHQRIVRGRSREARRIRTPPER	100	2e-63	gi|224003617|ref|XP_002291480.1|	RS26, ribosomal protein 26 40S small ribosomal subunit [Thalassiosira pseudonana CCMP1335]	63.83	5e-42	sp|Q9UTG4|RS26B_SCHPO	40S ribosomal protein S26-B OS=Schizosaccharomyces pombe (strain 972 / ATCC 24843) GN=rps2602 PE=3 SV=1	100	4e-62	tr|B8C5Y3|B8C5Y3_THAPS	40S ribosomal protein S26 (Fragment) OS=Thalassiosira pseudonana GN=RS26 PE=3 SV=1	gi|170290809|ref|YP_001737625.1|	55.8	8e-10	COG4830	Ribosomal protein S26	J	Translation, ribosomal structure and biogenesis	K02976|1|2e-41|135|sly:101247310| small subunit ribosomal protein S26e	GO:0006412//translation	GO:0003735//structural constituent of ribosome	GO:0005840//ribosome
28	EJK69871.1	hypothetical protein THAOC_08831 [Thalassiosira oceanica]	20838.3	0.267	3	13	-	3.47	1.204	4	0.006068	EJK69871.1	MEERGHSLESIMASIEARKPDFDAYIEPQKAFADYVIEVLPTDLDKEDKKTLKVRAIQKKGVADFNPTYLFDEGSEVSWTPSADKLSSPAPGMKLSYTQEEYFGNDVSVLEMDGSFDNIQELVYVESNLGNANSKFYGEITQAMLSLADSPGSNNGTGLMQTLAAFAIRELYNKKAASAKLAASKEAVATA	100	7e-115	gi|397630689|gb|EJK69871.1|	hypothetical protein THAOC_08831 [Thalassiosira oceanica]	61.49	1e-68	sp|P26302|KPPR_WHEAT	Phosphoribulokinase, chloroplastic OS=Triticum aestivum PE=2 SV=1	100	2e-113	tr|K0T8Z3|K0T8Z3_THAOC	Uncharacterized protein OS=Thalassiosira oceanica GN=THAOC_08831 PE=4 SV=1	gi|428769812|ref|YP_007161602.1|	221	1e-70	COG0572	Uridine kinase	F	Nucleotide transport and metabolism	K00855|1|2e-71|224|sot:102591470| phosphoribulokinase [EC:2.7.1.19]	GO:0005975//carbohydrate metabolic process;GO:0016310//phosphorylation;GO:0006950//response to stress	GO:0005524//ATP binding;GO:0008974//phosphoribulokinase activity	GO:0009526//plastid envelope;GO:0009579//thylakoid;GO:0016020//membrane;GO:0044434//chloroplast part
29	EED89909.1	predicted protein, partial [Thalassiosira pseudonana CCMP1335]	18339	0.089	1	3	XP_002292713.1	0.82	0.074	4	0.02189	EED89909.1	RIVFRLYWNVAPLACENFATLCTNGGNSILGCSNNNKLKPAPIGESGKELSYKNSTIHRVVLEFIVQGGDFVFGNGSGGESIYNGKKFKDERAGLALKHDRAGVLSMGNSGKNANTSQFFITLDKSPQCDGKHVVFGEVVSGMEVVRAMESYGSSNGEPSVPLQITECG	100	2e-111	gi|224007507|ref|XP_002292713.1|	predicted protein [Thalassiosira pseudonana CCMP1335]	49.7	2e-37	sp|P21569|CYPH_MAIZE	Peptidyl-prolyl cis-trans isomerase OS=Zea mays GN=CYP PE=2 SV=1	100	5e-110	tr|B8C9S8|B8C9S8_THAPS	Peptidyl-prolyl cis-trans isomerase (Fragment) OS=Thalassiosira pseudonana GN=THAPSDRAFT_19106 PE=3 SV=1	gi|16330433|ref|NP_441161.1|	151	1e-45	COG0652	Peptidyl-prolyl cis-trans isomerase (rotamase) - cyclophilin family	O	Posttranslational modification, protein turnover, chaperones	K01802|1|1e-39|135|thj:104807794| peptidylprolyl isomerase [EC:5.2.1.8]	GO:0000413//protein peptidyl-prolyl isomerization;GO:0006457//protein folding;GO:0008380//RNA splicing	GO:0003755//peptidyl-prolyl cis-trans isomerase activity;GO:0005515//protein binding	GO:0044444//cytoplasmic part
30	EED90008.1	translation elongation factor alpha [Thalassiosira pseudonana CCMP1335]	50546	0.23	2	8	XP_002292812.1	0.7	0.119	4	0.02486	EED90008.1	MSGKEHLSVVVCGHVDAGKSTTCGHLIFKQGGISQREMDKLQATAEEKGKSSFGFAYYLDTCKEERERGVTIQCNTKEFFTEKYHYTIVDAPGHKDYIKNMITGSATADVGLLLVPAEKGGFEAAIAKADAKLGVEEGQTRQHARLLYLLGVEQIIVGINKMDACNWDEGRFNEIKDEFQKMLQMIGFKPKKVPFIPYSGFNGDNLVEKTDKAPWYNGWEANINPKTVVKGFTLVECLNNFIQPPKRHPELPVRLPISNIYNIKGVGQIICGTVEQGTLTPGDVIGIVPSNLRDKKVFSIEQHKKQLEKACPGDSVGLSIKGIAKDEKVQPGDIIYVQKEGDLKPIKSFTAMVAVQEHPGVLKPGYAPVVFCRTAKVACKMTKILWKMGKKTGGQKVDN…	100	0	gi|224007705|ref|XP_002292812.1|	translation elongation factor alpha [Thalassiosira pseudonana CCMP1335]	45.19	1e-132	sp|P41752|EF1A_ASHGO	Elongation factor 1-alpha OS=Ashbya gossypii (strain ATCC 10895 / CBS 109.51 / FGSC 9923 / NRRL Y-1056) GN=TEF PE=3 SV=1	100	0	tr|B8C995|B8C995_THAPS	Translation elongation factor alpha OS=Thalassiosira pseudonana GN=THAPSDRAFT_41829 PE=4 SV=1	gi|347522783|ref|YP_004780353.1|	361	5e-120	COG5256	Translation elongation factor EF-1alpha (GTPase)	J	Translation, ribosomal structure and biogenesis	K03231|1|2e-166|480|bpg:Bathy04g02510| elongation factor 1-alpha	GO:0006414//translational elongation;GO:0006184//GTP catabolic process	GO:0003746//translation elongation factor activity;GO:0003924//GTPase activity;GO:0005525//GTP binding	-
31	EJK56644.1	hypothetical protein THAOC_23429 [Thalassiosira oceanica]	26401.2	0.033	1	3	-	0.46	0.225	4	0.04107	EJK56644.1	MKLALIASLAGSAAAFTSAPVKSSSALYMSETPTAVEETVEETVVAIEEEIVVVEEPKYMTINGWTADENKPLYGLPGAIAPLGFFDPLGFSKDVELTGAKRLREAEIMHGRVAMMATVGYLIGESTPTITYGMDVHHTIANNQIPEVPGTVLFPFFLAINISEALRASRGWVEPGMGPVFTLRENYYPGDIGFDPLGLKPNDAEGFVNMQNREISNGRLAMFAAAGMCVQEQINGKGILENLGF	100	2e-141	gi|397595979|gb|EJK56644.1|	hypothetical protein THAOC_23429 [Thalassiosira oceanica]	45.18	3e-36	sp|Q39709|FCP_ISOGA	Fucoxanthin-chlorophyll a-c binding protein, chloroplastic OS=Isochrysis galbana GN=FCP PE=1 SV=1	100	5e-140	tr|K0RW58|K0RW58_THAOC	Uncharacterized protein OS=Thalassiosira oceanica GN=THAOC_23429 PE=4 SV=1	-	-	-	-	-	-	-	K08907|1|3e-34|126|cre:CHLREDRAFT_184730| !K08908|2|4e-16|79.0|thj:104808113|	GO:0009765//photosynthesis, light harvesting		GO:0016020//membrane;GO:0009507//chloroplast
32	YP_009093242.1	ribosomal protein S8 (chloroplast) [Roundia cardiophora]	14928.1	0.258	2	5	AIR75915.1	0.39	0.136	4	0.0116	YP_009093242.1	MVTDNIADMLTRIRNANMVKHQIVEIPATKMSKSIAIILKEEGFIENFEIYNENLYQYLLLSLKYKGQSRERVINKIKRISKPGLRVYANSKTLPNVLDGLGIAILSTSKGVITNIKAKELGIGGEVLCYIW	100	1e-77	gi|700658237|ref|YP_009093242.1|	ribosomal protein S8 (chloroplast) [Roundia cardiophora]	86.36	8e-68	sp|A0T0Y6|RR8_THAPS	30S ribosomal protein S8, chloroplastic OS=Thalassiosira pseudonana GN=rps8 PE=3 SV=1	100	4e-76	tr|A0A089VNH3|A0A089VNH3_9STRA	30S ribosomal protein S8, chloroplastic OS=Roundia cardiophora GN=rps8 PE=3 SV=1	gi|434391766|ref|YP_007126713.1|	177	5e-57	COG0096	Ribosomal protein S8	J	Translation, ribosomal structure and biogenesis	K02994|1|6e-39|130|ppp:PhpapaCp064| small subunit ribosomal protein S8	GO:0006412//translation	GO:0003735//structural constituent of ribosome;GO:0019843//rRNA binding	GO:0005840//ribosome;GO:0009507//chloroplast;GO:0005739//mitochondrion
33	EJK62766.1	hypothetical protein THAOC_16609 [Thalassiosira oceanica]	35768.1	0.263	2	9	-	0.5	0.118	4	0.00947	EJK62766.1	MTGNGNGENGNGAKIGTSKVKQGLAQMLKGGVIMDVMNVEQAKIAEAAGAVAVMALERIPADIRRDGGVARMSDPSMILEIKNAVTIPVMAKARIGHFVEAQILEACEVDYIDESEVLTMADEVNHIDKNQFNVPFVCGCRNIGEALRRVAEGGAMLRTKGEAGTGNIVEAVRHARTVQGEIKRLSVMTKDELFVAAKELQAPYELVKYVADNGRLPVVNFAAGGVATPADAALMMQLGMDGVFVGSGIFKSADPEARAKAIVKAVTHYKDPKVLMEVSTGLGPAMVGICDIKGDPVNFRDREGGEYTYSGKVPPKKELHGKTETQMYGSSWGN	100	0	gi|397614388|gb|EJK62766.1|	hypothetical protein THAOC_16609 [Thalassiosira oceanica]	77.29	5e-127	sp|B9LIK3|PDXS_CHLSY	Pyridoxal 5'-phosphate synthase subunit PdxS OS=Chloroflexus aurantiacus (strain ATCC 29364 / DSM 637 / Y-400-fl) GN=pdxS PE=3 SV=1	100	0	tr|K0SP72|K0SP72_THAOC	Uncharacterized protein OS=Thalassiosira oceanica GN=THAOC_16609 PE=3 SV=1	gi|219849799|ref|YP_002464232.1|	425	4e-149	COG0214	Pyridoxal biosynthesis lyase PdxS	H	Coenzyme transport and metabolism	K06215|1|1e-127|370|mis:MICPUN_107893| pyridoxal 5'-phosphate synthase pdxS subunit [EC:4.3.3.6]	GO:0042823//pyridoxal phosphate biosynthetic process	GO:0003824//catalytic activity	-
34	EJK74769.1	hypothetical protein THAOC_03538 [Thalassiosira oceanica]	21526.9	0.046	1	1	-	0.69	0.067	4	0.0045	EJK74769.1	MFKRFDSSNDVSTSTQVKSSVQRGIKSQITTSHPSVTEEILDAFLPKKPPLVQYKIGPHLMLYCKQIEGSGNGDEPIFFQHRDGPILPTLKFVHKYPLVEFTKVTVDRGAIPYLLGGANVMCPGLTNVGGEMPADSDEGPGLAKGDGVVIYAEGKESALAVGFMKMSSADIRKKNKGTGIELCHFIGDGLWDTEEIN	100	3e-135	gi|397641638|gb|EJK74769.1|	hypothetical protein THAOC_03538 [Thalassiosira oceanica]	46.63	3e-48	sp|P87313|TMA20_SCHPO	Translation machinery-associated protein 20 OS=Schizosaccharomyces pombe (strain 972 / ATCC 24843) GN=tma20 PE=3 SV=5	100	9e-134	tr|K0TCA7|K0TCA7_THAOC	Uncharacterized protein OS=Thalassiosira oceanica GN=THAOC_03538 PE=4 SV=1	gi|312137430|ref|YP_004004767.1|	70.1	1e-13	COG2016	Predicted ribosome-associated RNA-binding protein Tma20, contains PUA domain	J	Translation, ribosomal structure and biogenesis	K07575|1|1e-46|154|vvi:100259659| PUA domain protein		GO:0003723//RNA binding	-
35	ABK20847.1	preprotein translocase subunit A (chloroplast) [Thalassiosira pseudonana]	101445	0.096	1	1	sp|A0T0V8.1|SECA_THAPS;ABK20793.1;YP_874570.1;YP_874624.1	0.7	0.147	4	0.03878	ABK20847.1	MLKNPFIKDSGLNQYQPLINQINALETNLKTLTDTELRNKTFELKKRYQEEQDLNALTAEAFAITREASFRTLGLRHFDVQLIGGLVLNSGKISEMRTGEGKTLVATLPAYLNALTDKGVHIVTVNDYLASRDQISMGQIYRFLGLDTGLIQEDMAFLERQQNYKAEITYVTNNEVAFDYLRDNMASNLSQVVLPPFNYCIVDEVDSIFIDEAQVPLIISQAVETCIDKYIVAAEVAEYLEVNVHFKVDEKNRNIILTEQGTAQIEKILQVEDLYNPNDPWIPYILSAIKATALFFRNVHYIVQNNQIIIVDEFTGRIMPDRRWNEGLHQAVEAKEGVPIRQNTETAASITYQNFFLLYPKLSGMTGTAKTSEVEFEKIYNLPVEEIPTARPNLRKDLP…	100	0	gi|118411176|ref|YP_874570.1|	preprotein translocase subunit A [Thalassiosira pseudonana]	100	0	sp|A0T0V8|SECA_THAPS	Protein translocase subunit SecA OS=Thalassiosira pseudonana GN=secA PE=3 SV=1	92.94	0	tr|A0A089X9C4|A0A089X9C4_THAWE	Protein translocase subunit SecA OS=Thalassiosira weissflogii GN=secA PE=3 SV=1	gi|22299394|ref|NP_682641.1|	866	0	COG0653	Preprotein translocase subunit SecA (ATPase, RNA helicase)	U	Intracellular trafficking, secretion, and vesicular transport	K03070|1|0.0|790|cit:102630213| preprotein translocase subunit SecA	GO:0017038//protein import;GO:0065002//intracellular protein transmembrane transport;GO:0006605//protein targeting	GO:0005524//ATP binding	GO:0005886//plasma membrane;GO:0009570//chloroplast stroma;GO:0009535//chloroplast thylakoid membrane
36	EJK73852.1	hypothetical protein THAOC_04502 [Thalassiosira oceanica]	58174.9	0.058	1	1	-	0.8	0.069	4	0.01286	EJK73852.1	MTLAKLAMVGPRKALNQAAGASMLLKKGHTASSGLEEATLRNVEACRDISTITRTSMGPNGMNKLVVNHLGKIIVTSDCATIVKELEIEHPAARMLQLAAESQDFECGDGTNLVVSFAGELLAQTENLFRMGLHPSDVVSGFSKAGDKLLNEFLPPLAEIMQPVSSGRDKDEIIRATKPVLAAKHLGSENILAPLVAEACLGTMSSTGKASFSVESVRVAKILGGDVTQSHVVHGFVALRGLETTLSAAKDAKVVVFSCGMEASATEAKGTVLMKNADDLKNYNKSEEKKMEEIIKGIADSGVKVCVSGGTVSEMALHFIERYGMLCLKVGSKWELRRLCVATGATALVRLGAPTPDEMGHCDHVHQKEVGGRPITVFAQSDGSKTSKLSTIVLRASTS…	100	0	gi|397639951|gb|EJK73852.1|	hypothetical protein THAOC_04502 [Thalassiosira oceanica]	48.97	1e-163	sp|Q94K05|TCPQ_ARATH	T-complex protein 1 subunit theta OS=Arabidopsis thaliana GN=CCT8 PE=1 SV=1	100	0	tr|K0TNU9|K0TNU9_THAOC	Uncharacterized protein OS=Thalassiosira oceanica GN=THAOC_04502 PE=3 SV=1	gi|313124879|ref|YP_004035143.1|	281	5e-86	COG0459	Chaperonin GroEL (HSP60 family)	O	Posttranslational modification, protein turnover, chaperones	K09500|1|5e-170|495|sly:101262749| T-complex protein 1 subunit theta	GO:0006457//protein folding	GO:0051082//unfolded protein binding;GO:0005524//ATP binding	GO:0005737//cytoplasm
37	XP_002294392.1	predicted protein [Thalassiosira pseudonana CCMP1335]	13778.8	0.061	1	4	EED88226.1	0.83	0.09	4	0.03952	XP_002294392.1	MSTETKGRGGGRGGGGRGGGGGGRGGAGNSKKESILELAKLVDSSVRVKCLGGRELRGALRGYDELVNLVLDDCEEFMRDPEDPETITNQTRKLGLVVIRGTQVSLVSPEEGTEEIANPFLGGGEEEEEEG	100	3e-52	gi|224010870|ref|XP_002294392.1|	predicted protein [Thalassiosira pseudonana CCMP1335]	60.22	4e-29	sp|Q9SI54|LSM7_ARATH	Sm-like protein LSM7 OS=Arabidopsis thaliana GN=LSM7 PE=1 SV=1	100	7e-51	tr|B8CE82|B8CE82_THAPS	Uncharacterized protein OS=Thalassiosira pseudonana GN=THAPSDRAFT_10683 PE=4 SV=1	gi|385805901|ref|YP_005842299.1|	57	4e-10	COG1958	Small nuclear ribonucleoprotein (snRNP) homolog	K	Transcription	K12626|1|7e-31|109|vvi:100855332| U6 snRNA-associated Sm-like protein LSm7	-	-	-
38	XP_002290029.1	predicted protein [Thalassiosira pseudonana CCMP1335]	69216.3	0.031	2	2	EED93566.1	0.79	0.112	4	0.04017	XP_002290029.1	MESSQPDYSALRLENIAITFRDQPVLQSATWGVQTGDRIGLVGANGAGKTTQLRIMAGELEPTAGDVVKSKKDLRVAMLRQEFIDEIDLERTLRDEFMSVFTEEAEIMEQLREAEEQLGQMSGDAVDADAMQEVLDRMAKLQNKADDKNVNALDSRVSKIMDLMGFDPEEGDYTVGMFSGGWKMRIGLGKVLLKDPNILLLDEPTNHLDLESVEWLEAFLRNQNIPMVIVSHDREFLDQVCTKIVDAEGGICSEYNGNYSKFLQLKKARMDSWHASYNAQEKKIKEEKQWINKFRLKQPQAVKQREAQLEKLVKSSDYIQKPPFFGKPFRFRFPAAPRLSPEVAEVKGLTHGYGDGANRLFEDTDLFIEKGDRIAIIGPNGAGKSTLLRILMGKEQPDE…	100	0	gi|224000713|ref|XP_002290029.1|	predicted protein [Thalassiosira pseudonana CCMP1335]	45.79	7e-157	sp|Q9LV93|AB5F_ARATH	ABC transporter F family member 5 OS=Arabidopsis thaliana GN=ABCF5 PE=2 SV=1	100	0	tr|B8C0S4|B8C0S4_THAPS	Uncharacterized protein OS=Thalassiosira pseudonana GN=THAPSDRAFT_40554 PE=4 SV=1	gi|428320056|ref|YP_007117938.1|	551	0	COG0488	ATPase components of ABC transporters with duplicated ATPase domains	R	General function prediction only	K06158|1|7e-76|259|bvg:104892575| ATP-binding cassette, subfamily F, member 3!K06185|4|4e-75|254|thj:104810871| ATP-binding cassette, subfamily F, member 2	GO:0006200//ATP catabolic process	GO:0016887//ATPase activity;GO:0005524//ATP binding	-
39	EJK45128.1	hypothetical protein THAOC_36273 [Thalassiosira oceanica]	110747	0.128	4	6	-	0.77	0.041	4	0.002262	EJK45128.1	MALLSSSIRRSPAALRHVLSSASGNAARARTIHSTSVACADALDMADTFSRRHLGPAEEDTKVMLQSIGFDSFESLVNSTVPANILSGKELNLEPALSETEALKRIKSMADKNTVMKSYIGMGYYDTIVPNVILRNMLENPGWYTAYTPYQAEIAQGRLEMLLNFQTLCSDLTGLPMSVASLLDESTAAAEAMQMCFSLKGKKGKKNKFFVSQDVHPQTISLIQTRAAVIGIDVVVGEHSSSEVDSGEYCGAVLQYPNTYGAVESSGESYEEFTKRAHTGGAMVICATDLMALTKLAPPSSWGCDIAVGSAQRFGVPMGFGGPHAGFLSTSDKYSRKMPGRIIGVTIDSEGKPCLRMAMQTREQHIRRDKATSNICTAQALLANMAASYAIYHGPEGLK…	100	0	gi|397566636|gb|EJK45128.1|	hypothetical protein THAOC_36273 [Thalassiosira oceanica]	55.77	0	sp|O49850|GCSP_FLAAN	Glycine dehydrogenase (decarboxylating), mitochondrial OS=Flaveria anomala GN=GDCSP PE=3 SV=1	100	0	tr|K0QZL5|K0QZL5_THAOC	Glycine cleavage system P protein OS=Thalassiosira oceanica GN=THAOC_36273 PE=3 SV=1	gi|476415987|ref|YP_007545905.1|	1104	0	COG1003	Glycine cleavage system protein P (pyridoxal-binding), C-terminal domain	E	Amino acid transport and metabolism	K00281|1|0.0|1095|ccp:CHC_T00009122001| glycine dehydrogenase [EC:1.4.4.2]	GO:0055114//oxidation-reduction process;GO:0019464//glycine decarboxylation via glycine cleavage system	GO:0004375//glycine dehydrogenase (decarboxylating) activity;GO:0030170//pyridoxal phosphate binding	-
40	EED94748.1	predicted protein [Thalassiosira pseudonana CCMP1335]	29407	0.174	4	16	XP_002287305.1	1.571	0.002	4	0.0003516	EED94748.1	MKFIAAAFAAVATQNVAAFAPMTQRSRVSTSIRMALSQDELKKMVGYKSVDDYVKSGMVVGLGTGSTAYFAVERLGEKLKSGELKDIVAIPTSVRTKEQAEELGIPLVTLDTHSKLDVAIDGADEVDPDLNLVKGGGGALLREKMVEVCADKFIVIVDESKLCDGLGPGFPLPVEITPFCHIHTLNTIAALPSCAGCKAVLRMGSSSTNKPDGDEIAVTDNGNYIVDLHFTEPIKDAPTMAKELKNTVGVVDHGLFCGMTTAVIIAGSDGISVKEA	100	0	gi|223995243|ref|XP_002287305.1|	predicted protein [Thalassiosira pseudonana CCMP1335]	56.69	9e-87	sp|Q9S726|RPI3_ARATH	Probable ribose-5-phosphate isomerase 3, chloroplastic OS=Arabidopsis thaliana GN=RPI3 PE=1 SV=1	100	0	tr|B8BUF2|B8BUF2_THAPS	Uncharacterized protein OS=Thalassiosira pseudonana GN=THAPSDRAFT_270308 PE=3 SV=1	gi|218780813|ref|YP_002432131.1|	209	7e-66	COG0120	Ribose 5-phosphate isomerase	G	Carbohydrate transport and metabolism	K01807|1|6e-143|406|bpg:Bathy03g04860| ribose 5-phosphate isomerase A [EC:5.3.1.6]	GO:0009052//pentose-phosphate shunt, non-oxidative branch	GO:0004751//ribose-5-phosphate isomerase activity	-
41	XP_002293018.1	predicted protein [Thalassiosira pseudonana CCMP1335]	30133.6	0.036	1	2	EED89479.1	0.6	0.071	4	0.003109	XP_002293018.1	MEEKKTEDPNLTDEPVPKQQSSLRPSPTKVEPTFTAPYGPNLHVSKHPVLAHKLSILRSSSTSPSSFRSTLREITFHLGYEATSTLTTRDVPLTVPGTDHKTHIEATGTKLAQKVALIPILRSGLGMVDSMLELISSAEVHHIGMYRSKSLMPVQYYNRLPKKCDVDVAYVLDPLIATSATIISVAGILKKWGVSEIHVVSVIASKQGLSELMKFHPDVHVTLGHIDEELNADGDVMPGLGDAGDRLFGTPLIEDEEELVHPSKRKRTMSVDDGN	100	0	gi|224008118|ref|XP_002293018.1|	predicted protein [Thalassiosira pseudonana CCMP1335]	45.19	6e-49	sp|A5UQV0|UPP_ROSS1	Uracil phosphoribosyltransferase OS=Roseiflexus sp. (strain RS-1) GN=upp PE=3 SV=1	100	0	tr|B8CAC1|B8CAC1_THAPS	Uncharacterized protein OS=Thalassiosira pseudonana GN=THAPSDRAFT_24488 PE=4 SV=1	gi|320161386|ref|YP_004174610.1|	195	2e-60	COG0035	Uracil phosphoribosyltransferase	F	Nucleotide transport and metabolism	K00761|1|6e-28|112|egr:104435449| uracil phosphoribosyltransferase [EC:2.4.2.9]	GO:0019438//aromatic compound biosynthetic process;GO:0006520//cellular amino acid metabolic process;GO:1901362//organic cyclic compound biosynthetic process;GO:0018130//heterocycle biosynthetic process;GO:0044271//cellular nitrogen compound biosynthetic process;GO:0044283//small molecule biosynthetic process	GO:0016740//transferase activity	-
42	CAI44219.1	fucoxanthin chlorophyll a/c binding protein, partial [Cyclotella cryptica]	3421.61	0.312	3	3	CAA06733.1;XP_002290650.1;EED92402.1	0.46	0.202	4	0.03181	CAI44219.1	MSRSIPFLTVPEKLDGSMPGDMGFDPMGLSDI	100	6e-15	gi|84871814|emb|CAI44219.1|	fucoxanthin chlorophyll a/c binding protein [Cyclotella cryptica]	-	-	-	-	100	2e-13	tr|Q2PC10|Q2PC10_9STRA	Fucoxanthin chlorophyll a/c binding protein (Fragment) OS=Cyclotella cryptica GN=fcp4 PE=4 SV=1	-	-	-	-	-	-	-	K08907|1|4e-09|51.6|ccp:CHC_T00008505001|	-	-	-
43	EJK46199.1	hypothetical protein THAOC_35149 [Thalassiosira oceanica]	161637	0.012	1	1	-	0.81	0.111	4	0.04903	EJK46199.1	MKSTHLRYEEDAGAYRTEPTLFVNGKRLPSSLSSRARPNQTLLDFLRVECKLTGSKLGCGEGGCGACTVLVSRLSGKGRVVHVAVNACLFPVLAADGCHVTTIEGIGSFKHDGSTLQSNFDRNGEAKEDYLHPIQRVMIDFHGSQCGYCTPGIIMALYGLFADNEPNAKHLEEHLDGNLCRCTGYRPIWDAARSLCGDVEETVGPCGTPCRQCPEREDCTMDCNVKDKAVCSSTASKVNAYQTVLREKHSDDWWKQPTAMFPTELLDEGLQNQLTKPLKVCDDSIHNGGTWYQPTSLLDLLSLIETHNEAGVKLVVGNTEVGIETKFKHAIYSTMIHPSRSIPGLYDVSTPDDFLVIGSCASLSSLQSTCHQLMSDESEARKAKTARPIHDMLRWFAST…	100	0	gi|397568549|gb|EJK46199.1|	hypothetical protein THAOC_35149 [Thalassiosira oceanica]	38.95	0	sp|Q6AUV1|XDH_ORYSJ	Xanthine dehydrogenase OS=Oryza sativa subsp. japonica GN=XDH PE=2 SV=1	100	0	tr|K0R3W7|K0R3W7_THAOC	Uncharacterized protein OS=Thalassiosira oceanica GN=THAOC_35149 PE=4 SV=1	gi|383457692|ref|YP_005371681.1|	595	0	COG4631	Xanthine dehydrogenase, molybdopterin-binding subunit B	F	Nucleotide transport and metabolism	K00106|1|0.0|905|vvi:100248547| xanthine dehydrogenase/oxidase [EC:1.17.1.4 1.17.3.2]		GO:0046872//metal ion binding;GO:0016614//oxidoreductase activity, acting on CH-OH group of donors	-
44	EJK51577.1	hypothetical protein THAOC_29237 [Thalassiosira oceanica]	80976.9	0.176	5	15	-	0.55	0.116	4	0.01036	EJK51577.1	MSDDQSESYAFSADINQLLSLIINTFYSNKEIFLRELISNSSDALDKIRYQSLTDSSVLDSEPEMQIKLIPDKANNTLTIEDSGIGMTKADLVNNLGTIAKSGTKAFMEALTAGADISMIGQFGVGFYSAYLVADKVEVVSKNNDDECYTWISEAGGSFTITKTNDSGLGRGTRIILHLKEDMSEYLEERRIKDLVKKHSEFIGFPIKLYTEKTTEKEVTDDDDDDDEDEGDDDKPKIEEVDDEEEAKKEKKTKKIKEVSHEWEHLNNMKPLWMRKADDVTQDEYAAFYKSISNDWEEHAAVKHFSVEGQLEFRAVLFCPKRAPFDMFEGGAKKKHNSIKLYVRRVFIMDNCEDLMPEWLAFIKGVVDSEDLPLNISRETLQQNKILRVIKKNLVKKCI…	100	0	gi|397580422|gb|EJK51577.1|	hypothetical protein THAOC_29237 [Thalassiosira oceanica]	72.12	0	sp|P36181|HSP80_SOLLC	Heat shock cognate protein 80 OS=Solanum lycopersicum GN=HSC80 PE=2 SV=1	100	0	tr|K0RY02|K0RY02_THAOC	Uncharacterized protein OS=Thalassiosira oceanica GN=THAOC_29237 PE=3 SV=1	gi|108760025|ref|YP_634186.1|	574	0	COG0326	Molecular chaperone, HSP90 family	O	Posttranslational modification, protein turnover, chaperones	K04079|1|0.0|930|bna:106405586| molecular chaperone HtpG	GO:0006457//protein folding;GO:0006950//response to stress	GO:0051082//unfolded protein binding;GO:0005524//ATP binding	GO:0005737//cytoplasm
45	EJK56278.1	hypothetical protein THAOC_23874 [Thalassiosira oceanica]	44336	0.204	2	4	-	0.6	0.041	4	0.0006594	EJK56278.1	MATTVQAQGVDKYYSSKIGDLSSTIEERTSDLQRLKAQRNELNAKVRMLREELYHLQEPGSYVGEVIKQMGQKKVLVKINPEGKYVVDIDKDIDINDLKPNTRVALRNDSYTLHKILPTKVDPLVSLMKVEAVPDSTYDMIGGLEKQVMEIKEVIELPIKHPELFESLGVAQPKGVLLYGPPGTGKTLLARAVAHHTDCTFIRVSGAELVQKYIGEGSRMVRELFVMAREASPSIIFMDEIDSIGQSRGGGGSGGGDSEVQRTMLELLNQLDGFEPAQNIKVIMATNRIDILDAALLRPGRIDRKIEFPNPNAENREAIMKIHSSKMNLLRNIDLSTIAEKMGNASGAECKAVCTEAGMFALRERRVHVTQEDFEMAVSKVMKKEGESNMSLQRLWK	100	0	gi|397594574|gb|EJK56278.1|	hypothetical protein THAOC_23874 [Thalassiosira oceanica]	78.54	0	sp|Q9C5U3|PRS8A_ARATH	26S proteasome regulatory subunit 8 homolog A OS=Arabidopsis thaliana GN=RPT6A PE=1 SV=1	100	0	tr|K0RR93|K0RR93_THAOC	Uncharacterized protein OS=Thalassiosira oceanica GN=THAOC_23874 PE=3 SV=1	gi|18976487|ref|NP_577844.1|	361	2e-121	COG1222	ATP-dependent 26S proteasome regulatory subunit	O	Posttranslational modification, protein turnover, chaperones	K03066|1|0.0|610|nnu:104595314| 26S proteasome regulatory subunit T6	GO:0030163//protein catabolic process	GO:0005524//ATP binding;GO:0017111//nucleoside-triphosphatase activity	GO:0005737//cytoplasm;GO:0000502//proteasome complex
46	EJK68559.1	hypothetical protein THAOC_10248, partial [Thalassiosira oceanica]	118708	0.008	1	1	-	0.72	0.088	4	0.01252	EJK68559.1	ESAPDSNFRDNLGAPPLPQPSADRPPPGDEGDGPSDGAYDRDSVASNGPLGGGAPVTENGMRKKAPRALTYSQIRWIGDVAKVYPSGATEEQIAQNQTKRVEIFKMPSGTDYVLHDIDENNCITGKARFSGHVRVSEGISVIGLDDDHDDATSAAEDSSHGGSVPLLPPTFCPPSFGVTVLGNSHGFDKSGSTSGYVLWINGRGVMIDPPPYSSATLEREGIRPRTIVGIILTHCHADHDAGAFQKVLTGSPVVVITTPTIYKSFIRKYAALSSLSPALLRHSHRYKPAIIGEPLRFQGATFNFTYTLHAIPCVGFRVDWRGRSMVFTGDHFNNPPALEKLMEKVSGAVPIANSRLSLSFSLIHKKRTSMNACASVPTQGIMSKARLADLNHLPLQQAD…	100	0	gi|397627654|gb|EJK68559.1|	hypothetical protein THAOC_10248, partial [Thalassiosira oceanica]	43.73	4e-64	sp|Q8MLZ3|PDE5_DICDI	cGMP-dependent 3',5'-cGMP phosphodiesterase A OS=Dictyostelium discoideum GN=pdeD PE=1 SV=1	100	0	tr|K0SUD6|K0SUD6_THAOC	Uncharacterized protein (Fragment) OS=Thalassiosira oceanica GN=THAOC_10248 PE=4 SV=1	gi|392402744|ref|YP_006439356.1|	216	2e-57	COG1234	Ribonuclease BN, tRNA processing enzyme	J	Translation, ribosomal structure and biogenesis	-	-	-	-
47	EJK50493.1	hypothetical protein THAOC_30502 [Thalassiosira oceanica]	95862.1	0.142	1	2	-	0.66	0.137	4	0.02615	EJK50493.1	MVNASMAAAGAATTAAICVALLTSAPATVESRGLFGVSPVSSHHRAMTRNTAPQPLGEALLSSVPRGGDEEGEEEEKKPLYLPELVTTSVSKKSSGASGDYAISLSPEKASELSVRSGDVVTVIGRRRRSAYATVSVDRKLSGDSLRVSENMSANLRVRDDDKAKVIKLTGDGEDRHTIEPASAASATLSPVRDSLMTLHALHGGDMDDDSLLERFVRPYLNLDEDESVILGKGNVLKLMDDDGAVLEFQVVQLEDGNEEASGAILDAETELIIGPSVDREVTGQGYDSVGGCGKAVKLMQELVELPLRFPELWTTAGVPTPKGVLLHGPPGCGKTLIANALMEETGAHVVSINGPEIMAKKGGESESNLRAAFEEAQNNSPSIIFMDELDSIAPKRDQ…	100	0	gi|397577199|gb|EJK50493.1|	hypothetical protein THAOC_30502 [Thalassiosira oceanica]	51.72	0	sp|P54774|CDC48_SOYBN	Cell division cycle protein 48 homolog OS=Glycine max GN=CDC48 PE=2 SV=1	100	0	tr|K0RA35|K0RA35_THAOC	Uncharacterized protein OS=Thalassiosira oceanica GN=THAOC_30502 PE=4 SV=1	gi|11498895|ref|NP_070126.1|	599	0	COG1222	ATP-dependent 26S proteasome regulatory subunit	O	Posttranslational modification, protein turnover, chaperones	K13525|1|0.0|724|gsl:Gasu_41710| transitional endoplasmic reticulum ATPase	GO:0051301//cell division	GO:0017111//nucleoside-triphosphatase activity;GO:0005524//ATP binding	-
48	EED96589.1	predicted protein, partial [Thalassiosira pseudonana CCMP1335]	35038.2	0.041	1	2	XP_002286948.1	0.72	0.152	4	0.04716	EED96589.1	MGFLRQGIATTQFFLFGKKHCTQTGYINHIKQYTEPVQSATIVDANDPNNDGVDLSGKTFIISGANQGIGKEIATYVASKNAKVYMLCRSKERAEDAQKEIQSSTNNQNINVLLGDVSEPSHIRRVVSEFEDKEGKLDCLVCNAGALFNERTVNSDGMEVTFMAHLACGSYQLTKLLLPSLKKASSDGGEARVVYVSSGGMYNTKFPDWDVATSTGEYESKFNGNMAYAYAKRGQVLLAEQFTKQYPEISFVSSHPGWVKTSGVDAAYGSQAKYLEPMRTLWEGSEGICWLTTTSKKNLEGGAFYLDRQPQTKHI	100	0	gi|223994529|ref|XP_002286948.1|	predicted protein [Thalassiosira pseudonana CCMP1335]	34.43	7e-45	sp|A0PJE2|DHR12_HUMAN	Dehydrogenase/reductase SDR family member 12 OS=Homo sapiens GN=DHRS12 PE=2 SV=2	100	0	tr|B8BRR7|B8BRR7_THAPS	Uncharacterized protein (Fragment) OS=Thalassiosira pseudonana GN=THAPSDRAFT_31125 PE=4 SV=1	gi|408417487|ref|YP_006758901.1|	163	7e-45	COG3427	Carbon monoxide dehydrogenase subunit G	C	Energy production and conversion	K11168|1|6e-54|182|egu:105040303| dehydrogenase/reductase SDR family member 12 [EC:1.1.-.-]	GO:0055114//oxidation-reduction process	GO:0016491//oxidoreductase activity;GO:0000166//nucleotide binding	-
49	EJK66240.1	hypothetical protein THAOC_12849 [Thalassiosira oceanica]	15096	0.069	1	7	EED90124.1;XP_002292928.1	0.6	0.021	4	8.435e-05	EJK66240.1	MVRMSVLADCLKTITNAEKRGKRQVLIRPSSKVIVKFLQCMQQNGYIGEFEIVDDHRSQKIVVELNGRLNKCGVISPRFDVQVHEIEKWVVNLLPSRQFGQIILSTTYGIMTHEEARRKKTGGKILGFFY	100	6e-93	gi|397621341|gb|EJK66240.1|	hypothetical protein THAOC_12849 [Thalassiosira oceanica]	76.92	3e-71	sp|Q9AT34|RS15A_DAUCA	40S ribosomal protein S15a OS=Daucus carota GN=RPS15A PE=2 SV=3	100	1e-91	tr|K0SLR1|K0SLR1_THAOC	Uncharacterized protein OS=Thalassiosira oceanica GN=THAOC_12849 PE=3 SV=1	gi|297527392|ref|YP_003669416.1|	136	1e-40	COG0096	Ribosomal protein S8	J	Translation, ribosomal structure and biogenesis	K02957|1|3e-75|222|ccp:CHC_T00010168001| small subunit ribosomal protein S15Ae	GO:0006412//translation	GO:0003735//structural constituent of ribosome	GO:0005840//ribosome
50	EED87535.1	predicted protein [Thalassiosira pseudonana CCMP1335]	56684	0.037	2	3	XP_002295231.1;EJK74922.1	0.74	0.116	4	0.02844	EED87535.1	MNNISGPGRRSAMSSVDFYRRVPKDLTEATSLGAIMSICAITVMAILFFSETLAFARTAMVTSIALDENDQPQIRLNFNITLMDLHCDFVSVDVWDTLGTNRQNVTKNIEKWQLDEDGQRRIFSGRNREQREVVHEEHEETLEELHEDGEQAVELHPENFKAFLEGHDMAFIDMYAPWCIWCQRLHPTWEKFGEKVHELGMPVGVGKVDCVVHAQLCKDEKVMAFPTLRWYKDGEAILPDYKMDRTVDALVGYAKRKLDMEQKYKDWESKNAGGNADARGKPRGGTSRPEHPGCQVSGHLMVNRVPGNFHIEAKSVNHNLNAAMTNLTHRVNHLSFGEPITKLPPHMENTPFMRKVKRVLKQVPEEHKQFNPMDDTEYVTAQFHQAFHHYIKVVSTHLN…	100	0	gi|224013158|ref|XP_002295231.1|	predicted protein [Thalassiosira pseudonana CCMP1335]	30.12	7e-69	sp|Q9T042|PDI54_ARATH	Protein disulfide-isomerase 5-4 OS=Arabidopsis thaliana GN=PDIL5-4 PE=2 SV=1	100	0	tr|B8CGA5|B8CGA5_THAPS	Uncharacterized protein OS=Thalassiosira pseudonana GN=THAPSDRAFT_43120 PE=4 SV=1	gi|433604391|ref|YP_007036760.1|	63.2	2e-10	COG3118	Negative regulator of GroEL, contains thioredoxin-like and TPR-like domains	O	Posttranslational modification, protein turnover, chaperones	K20367|1|7e-96|300|ccp:CHC_T00009222001| endoplasmic reticulum-Golgi intermediate compartment protein 3	GO:0045454//cell redox homeostasis	GO:0003824//catalytic activity	-
51	XP_002292230.1	eukaryotic translation initiation factor 2 alpha subunit [Thalassiosira pseudonana CCMP1335]	38236.9	0.157	4	7	EED90205.1	0.76	0.07	4	0.008761	XP_002292230.1	MTKTATDAVPTTLDAPEEGAFRVYLAEDKHNLDCRFYEAKYPEIESLVMVNVRTIADMGAYVSLLEYNNIEGLILLSELSRRRIRSINKLIRVGRNEVAMVLRVDKDKGYIDLSKRRVSPEDVAACEDKFNKAKAVHGVLRHLADRRKFYLEDLCERIAWPLYRKYGHAYDAFKIALADEAASGGEAAENDPFTSLDVPPDVIEELKLYIRRRLAPQPIKIRADVEVSCFTYDGIDAIRDALFAGIAVGTENSPIKIRLIAPPIYVLSTMTLEKEAGIALLQKSIDVILEKISAKGGKMDVKMAPKAVSLKEETELQAMMERLELENREVEGDEPEED	100	0	gi|224006540|ref|XP_002292230.1|	eukaryotic translation initiation factor 2 alpha subunit [Thalassiosira pseudonana CCMP1335]	57.62	2e-102	sp|P56286|IF2A_SCHPO	Eukaryotic translation initiation factor 2 subunit alpha OS=Schizosaccharomyces pombe (strain 972 / ATCC 24843) GN=tif211 PE=1 SV=1	100	0	tr|B8C817|B8C817_THAPS	Eukaryotic translation initiation factor 2 alpha subunit OS=Thalassiosira pseudonana GN=THAPSDRAFT_105 PE=4 SV=1	gi|333910862|ref|YP_004484595.1|	100	6e-23	COG1093	Translation initiation factor 2, alpha subunit (eIF-2alpha)	J	Translation, ribosomal structure and biogenesis	K03237|1|5e-98|296|bvg:104900238| translation initiation factor 2 subunit 1	GO:0006413//translational initiation	GO:0003743//translation initiation factor activity	GO:0005850//eukaryotic translation initiation factor 2 complex
52	XP_002289814.1	RL18a, ribosomal protein 18a 60S large ribosomal subunit [Thalassiosira pseudonana CCMP1335]	21099.9	0.077	1	5	EED93351.1	0.46	0.123	4	0.01192	XP_002289814.1	MTVAGAMRQYQVVGRKAGTDENPNPEAYRMIIFAPNPTVAKSKFWYFMRQFRKMKKTTGEILDCVEIIEKNSRTVKNYGIWLRYDSRSGTHNMYREYRDLKLTGAISQLYDEMAGRHRTRPRSIQIIRTATLGAGELKRPNGAQFAQAKVKFPLPHRVDSAKRGQKALSDRTFSTVRPTTYFG	100	1e-136	gi|224000283|ref|XP_002289814.1|	RL18a, ribosomal protein 18a 60S large ribosomal subunit [Thalassiosira pseudonana CCMP1335]	53.85	4e-67	sp|Q7ZWJ4|RL18A_DANRE	60S ribosomal protein L18a OS=Danio rerio GN=rpl18a PE=2 SV=1	100	3e-135	tr|B8BZG7|B8BZG7_THAPS	60S ribosomal protein L18a OS=Thalassiosira pseudonana GN=RL18a PE=3 SV=1	-	-	-	-	-	-	-	K02882|1|4e-59|185|sind:105167545| large subunit ribosomal protein L18Ae	GO:0006468//protein phosphorylation;GO:0006412//translation	GO:0003735//structural constituent of ribosome;GO:0004672//protein kinase activity;GO:0005524//ATP binding	GO:0005840//ribosome
53	EJK44657.1	hypothetical protein THAOC_36788 [Thalassiosira oceanica]	53008.4	0.027	1	1	-	0.61	0.137	4	0.02045	EJK44657.1	MDIDGADKQEEKPVKKAKVAAAQASASAESAAPYPDMALAQDIHRLTMIHAGKLSVDDATSITGTKPEDLLERVMLRVGAGSSKPFDDVIKENEEKYKAIEKEEGKDVSKVEAKEKEEQVDDSEEPLLNPELYRHLQSTLAYNSSSALSEDQLKTLAAHNESILAILAEGVTKAKEEAGDMEVLHATMEIARYQAKTGTKESALAAYENVLALPKLSVGKKLDGHLEMARVCSFWGDWRQMKDVLEKAQKIIASGGDWDRRNRLKAYQSLSNILVREFEPASKLLLGGIATFSCTELCEYPEYIMYAIITNLLFLKRTELKKNIIDGSEVLQVAKEIPVVLKLANTLYECDYKAYLHTIVDLQPHLVANRYLQPHSGYILRELHVLAFQQFLDSYQSVT…	100	0	gi|397565522|gb|EJK44657.1|	hypothetical protein THAOC_36788 [Thalassiosira oceanica]	41.57	6e-86	sp|Q93Y35|PSMD6_ARATH	26S proteasome non-ATPase regulatory subunit 6 homolog OS=Arabidopsis thaliana GN=RPN7 PE=1 SV=1	100	0	tr|K0RDS8|K0RDS8_THAOC	Uncharacterized protein OS=Thalassiosira oceanica GN=THAOC_36788 PE=4 SV=1	-	-	-	-	-	-	-	K03037|1|2e-89|281|gra:105800817| 26S proteasome regulatory subunit N7	-	-	-
54	EJK73051.1	hypothetical protein THAOC_05350, partial [Thalassiosira oceanica]	17448.3	0.054	1	1	-	0.51	0.079	4	0.003082	EJK73051.1	MLSLHVGRRRETVPVLLPRRKGKGKVAIAFIDLVLAPAGEYLPFLLHASHTLAAGVGVEAQRVPSAFAPPGGARVTEAQLAPPRAALAVRPGIPVHRAMAQVGGAKQILALPDEGTGRGGPAEAGGDAVYVSRVGFRGDDSRVGFQGEDGRCSRALLFDDVARSEMK	100	2e-89	gi|397638393|gb|EJK73051.1|	hypothetical protein THAOC_05350, partial [Thalassiosira oceanica]	-	-	-	-	100	4e-88	tr|K0THB3|K0THB3_THAOC	Uncharacterized protein (Fragment) OS=Thalassiosira oceanica GN=THAOC_05350 PE=4 SV=1	-	-	-	-	-	-	-	-	-	-	-
55	XP_002289836.1	predicted protein [Thalassiosira pseudonana CCMP1335]	45090.1	0.092	3	3	EED93373.1	0.49	0.05	4	0.0007837	XP_002289836.1	MTTAPACSDLQKKTALNGQYPPVPSVCVVTGGTGFVGMRLVEMLVERGAKKVISFDVVPPPKDAWKHPNIEWRVGDISDKAAVDELLSTPDIGCVWHNAAAVGPYHPKDLYFRVNYEGTLNVIDSAKKHGVSKIVFSSSPSTRFTGEDVDGLTEDEMPKLPLDKYMQTYAETKALGEMAITKACTNEFMTVAVAPHQVYGPRDNLFLPNLLEAAMNGKLRIFGEGHNRICFTHVDNYCHGLIIAEKALYPNSPALGKFYIVTDGTTHPLGNQYLIFWKELDEAVVGMGIPSLWSKAHLPKPLLLFVAAICDLFGKLFGITTKLNTFSVVVLTMHRWFDIKAAETDLKFKPIIGYSEGWKETIVWFRENWLPEQKKSPNSLFGIAKTTQKKIDIQDESSK…	100	0	gi|224000327|ref|XP_002289836.1|	predicted protein [Thalassiosira pseudonana CCMP1335]	30.06	2e-35	sp|Q3ZBE9|NSDHL_BOVIN	Sterol-4-alpha-carboxylate 3-dehydrogenase, decarboxylating OS=Bos taurus GN=NSDHL PE=2 SV=1	100	0	tr|B8BZL6|B8BZL6_THAPS	Uncharacterized protein OS=Thalassiosira pseudonana GN=THAPSDRAFT_4552 PE=4 SV=1	gi|190572287|ref|YP_001970132.1|	149	8e-40	COG0451	Nucleoside-diphosphate-sugar epimerase	M	Cell wall/membrane/envelope biogenesis	K07748|1|4e-34|135|eus:EUTSA_v10011495mg| sterol-4alpha-carboxylate 3-dehydrogenase (decarboxylating) [EC:1.1.1.170]	GO:0006694//steroid biosynthetic process;GO:0055114//oxidation-reduction process	GO:0000166//nucleotide binding;GO:0003854//3-beta-hydroxy-delta5-steroid dehydrogenase activity	-
56	EED94321.1	atp-dependent RNA helicase [Thalassiosira pseudonana CCMP1335]	57841.1	0.027	1	1	XP_002288885.1;EJK73804.1	0.5	0.128	4	0.01144	EED94321.1	MEQKKKRKSSVDASDEGQDNTFASLPLSDLTQNALSAMGFTRMTQIQAMSIPALLSGKDLIGAAKTGSGKTLAFLLPVVELLHNAKFGSRNGTGAIVISPTRELAMQIYGVCKDLCTSGKHHQTYGLIIGGANRRTEAERLAKGVNIVIATPGRLLDHLQNTKGFVFRNLLAFVMDEADRILEQGFEDDLRSIIKALPKQRQTMLFSATQTKKVEDLARTAIDPKSAVYVEVPNETNLATAAGLEQGYVTVPSDQRFLLLFTFLKKNKNKKIMVFFSSCNSVKFHSELLNYIDIPVMDIHGRQKQQKRTTTFFQFCKQTTGTLLCTDVAARGLDIPAVDWIIQFDPPDDPKEYIHRVGRTARGEKGKGRALLFLTPEETGFLRYLKAAKVTLNEYEFPM…	100	0	gi|223998424|ref|XP_002288885.1|	atp-dependent RNA helicase [Thalassiosira pseudonana CCMP1335]	64.56	0	sp|Q03532|HAS1_YEAST	ATP-dependent RNA helicase HAS1 OS=Saccharomyces cerevisiae (strain ATCC 204508 / S288c) GN=HAS1 PE=1 SV=1	100	0	tr|B8BY61|B8BY61_THAPS	RNA helicase OS=Thalassiosira pseudonana GN=THAPSDRAFT_39953 PE=3 SV=1	gi|91773889|ref|YP_566581.1|	241	9e-72	COG0513	Superfamily II DNA and RNA helicase	L	Replication, recombination and repair	K13179|1|0.0|637|csl:COCSUDRAFT_53012| ATP-dependent RNA helicase DDX18/HAS1 [EC:3.6.4.13]		GO:0003723//RNA binding;GO:0005524//ATP binding;GO:0008026//ATP-dependent helicase activity	-
57	pdb|3BOJ|A	Chain A, Carbonic Anhydrase From Marine Diatom Thalassiosira Weissflo Cadmium Bound Domain 1 Without Bound Metal (Cdca1-R1)	23179.6	0.047	1	2	pdb|3BOH|A;pdb|3BOH|B;AAX08632.1	0.69	0.112	4	0.0186	pdb|3BOJ|A	SHMSLTPDQIVAALQERGWQAEIVTEFSLLNEMVDVDPQGILKCVDGRGSDNTQFCGPKMPGGIYAIAHNRGVTTLEGLKQITKEVASKGHVPSVHGDHSSDMLGCGFFKLWVTGRFDDMGYPRPQFDADQGAKAVENAGGVIEMHHGSHAEKVVYINLVENKTLEPDEDDQRFIVDGWAAGKFGLDVPKFLIAAAATVEMLGGPKKAKIVIP	100	2e-158	gi|166007358|pdb|3BOH|A	Chain A, Carbonic Anhydrase From Marine Diatom Thalassiosira Weissflo Cadmium Bound Domain 1 With Acetate (Cdca1-R1)	-	-	-	-	100	4e-138	tr|Q50EL4|Q50EL4_THAWE	Cadmium-specific carbonic anhydrase (Fragment) OS=Thalassiosira weissflogii GN=cdca1 PE=1 SV=1	-	-	-	-	-	-	-	-		GO:0046872//metal ion binding	-
58	EED87074.1	predicted protein, partial [Thalassiosira pseudonana CCMP1335]	98805.6	0.029	3	5	XP_002296378.1	0.77	0.123	4	0.04383	EED87074.1	MDNDMISLPHLHEPAILHAVSERYFRGEIYTWTGPVLIAVNPFQRLPLYTREILESYRQEGLLRSQNLGDSAKKLGPHVYSIADRSYRQMMSEQRKSQSILISGESGAGKTETTKIVMLYLTTLGSAGEVAPNEGEEGGKLTIMERVLQSNPILEAFGNAKTLRNDNSSRFGKFIELGFNRAGILQGAKVQTYLLEKVRLGFHASGERNYHIFYQLLRGASEEQHHKYCFHDGITGGLELANFFHYTGQGGAPQLREFTDEEGLQYTLKSMRSMGWGEDRIDNVLSIIAGILHLGQVSFESKTNEGGQEIAQIGDEKTVADAAKLLGVDVHKLITALTVRIMVTRGEEIRIDLTPDKASDARDALSKTIYGAMFLWVVKEVNNSIKWENDKDIRSSAGV…	100	0	gi|224013428|ref|XP_002296378.1|	predicted protein [Thalassiosira pseudonana CCMP1335]	38.81	0	sp|F4I460|MYO8_ARATH	Myosin-8 OS=Arabidopsis thaliana GN=XI-B PE=3 SV=1	100	0	tr|B8LBM5|B8LBM5_THAPS	Predicted protein (Fragment) OS=Thalassiosira pseudonana GN=THAPSDRAFT_36563 PE=4 SV=1	-	-	-	-	-	-	-	K10357|1|0.0|576|bna:106362912| myosin V	GO:0048767//root hair elongation;GO:0051640//organelle localization	GO:0005524//ATP binding;GO:0003774//motor activity	GO:0016459//myosin complex
59	EJK55422.1	hypothetical protein THAOC_24853 [Thalassiosira oceanica]	9512.36	0.092	1	1	EJK45007.1	0.48	0.139	4	0.01394	EJK55422.1	MGQRGQLLGDKYKVKSIPTLVLLDEVGNVITADARNKIPADKAGIGFPWRSPMSVLISTLVPKSFRLMMKNQFLGILGKVKVALKAR	100	8e-57	gi|397591619|gb|EJK55422.1|	hypothetical protein THAOC_24853 [Thalassiosira oceanica]	-	-	-	-	100	2e-55	tr|K0S9I9|K0S9I9_THAOC	Uncharacterized protein OS=Thalassiosira oceanica GN=THAOC_24853 PE=4 SV=1	-	-	-	-	-	-	-	-	-	-	-
60	XP_002295291.1	hypothetical protein THAPSDRAFT_264946, partial [Thalassiosira pseudonana CCMP1335]	38519.2	0.067	2	3	EED87357.1	0.52	0.056	4	0.001135	XP_002295291.1	KKQGGAGKGKWLDPVDGSEHAAYTDLDENDPLYVAEEDADPNSYVLSSSEAVFGPMLTLSEFKIRVSDAVREYFDSSDADEVVRCIDELKCREYHPEVVKRAISLGLDEGPRERELVSRLLACLHPNPLRDEEMEGGFEVLLDSIEDLVIDIPDAKAMVGSFLARAVVDEVLAPAFLSNRNNTHPGDCVVEKAVSLLSREHCTARLEKVWGPGDGRPVSELKDIMDQLLKEYLLSRELDEAASCVRELKASHFNHELVKRGVKIAMEEDGRDHASESSALDAMAALFKFLVKNSIVSEYQVAKGVSRLRKIMPDLKLDVPAAERMLDEFEGMAKEGGFLHISSSD	100	0	gi|224013279|ref|XP_002295291.1|	hypothetical protein THAPSDRAFT_264946 [Thalassiosira pseudonana CCMP1335]	34.41	4e-42	sp|Q9JID1|PDCD4_RAT	Programmed cell death protein 4 OS=Rattus norvegicus GN=Pdcd4 PE=1 SV=2	100	0	tr|B8CGN8|B8CGN8_THAPS	Uncharacterized protein (Fragment) OS=Thalassiosira pseudonana GN=THAPSDRAFT_264946 PE=4 SV=1	-	-	-	-	-	-	-	K16865|1|6e-50|179|ppp:PHYPADRAFT_128768| programmed cell death protein 4	-	-	-
61	XP_002287800.1	predicted protein [Thalassiosira pseudonana CCMP1335]	45271	0.019	1	2	EED95243.1	0.15	0.038	4	0.0008505	XP_002287800.1	MSSSTAIAIFIAVVLQLFSSQLLPHGPAVDIPPNHGPHLGPDPDPSDTSLQLASGKLAVIRERVEEGMEALIVHPETVIFGDDGTMYVLSEGAKLVMLSDFRQDVKSPSTLTAKAAEVAHLGVGRPLAGKFDSNGCLYYADAILGLARICLPDSMTGNTSTTMKPNVELLASRVQLDDGTWSPISYADDVDIGPKTGHVYFSDASNVRSDRDLSTGIWDIVYASKVEGMRGSMTGRLLRYKPETGKVDVLATGAAFGNGVAVDKDETYVLYTATFDRAVMKYHLTGEKAGQVERILDQFPGILDGADCSHERGTCFVAIPTSIPLLPKIIYSLPSFIGKRLRSLLMLLPRTWTPKPERYGAFAEIHPGDEQSAPSIKRIVQDPDGIDMDMITGVTEYKG…	100	0	gi|223996253|ref|XP_002287800.1|	predicted protein [Thalassiosira pseudonana CCMP1335]	27.52	9e-21	sp|Q4V3D9|SSL10_ARATH	Protein STRICTOSIDINE SYNTHASE-LIKE 10 OS=Arabidopsis thaliana GN=SSL10 PE=2 SV=1	100	0	tr|B8BU92|B8BU92_THAPS	Uncharacterized protein OS=Thalassiosira pseudonana GN=THAPSDRAFT_2399 PE=4 SV=1	gi|15596490|ref|NP_249984.1|	130	1e-32	COG3386	Sugar lactone lactonase YvrE	G	Carbohydrate transport and metabolism	K01757|1|1e-10|66.2|bna:106357261| strictosidine synthase [EC:4.3.3.2]	GO:0009058//biosynthetic process	GO:0016844//strictosidine synthase activity	-
62	EJK66117.1	hypothetical protein THAOC_12984 [Thalassiosira oceanica]	47525.2	0.166	2	5	-	0.78	0.057	4	0.006124	EJK66117.1	MWAQDIRGSIAYAKSTQKVGILTADESASIISGLERVHKEWESGTFELKPGDEDIHTANERRLTEIIGPLGGKLHTGRSRNDQVATDTRLWIVEAERDILKDLGTLLAASSEFAREHIDVLMAGYTHLQPAQPIRFAHWLMSHMAALTRDAQRLQELIPRANQCPLGSGALAGNAFGVDRDFLASELGFEGVTSNSLDSVCDRDFVVEFLMWHSLLLTHLSQFAEDLIINNMLKCVDMDDAYATGSSLMPQKKNPDALELLRGKAGVALGRSVGLMATLKGLPRAYNKDLQEDKVPLFDAVDTVKDCLAIATGVIVTMKPNPKMLLKALCPEMLATDLADYLVRKGVPFRETHHISGACVRLAEEQEVSIDTLTLEQLQKIDARFEEDVLKIWDYEQSV…	100	0	gi|397621118|gb|EJK66117.1|	hypothetical protein THAOC_12984 [Thalassiosira oceanica]	55.95	9e-173	sp|P40369|ARLY_SCHPO	Argininosuccinate lyase OS=Schizosaccharomyces pombe (strain 972 / ATCC 24843) GN=arg7 PE=3 SV=2	100	0	tr|K0T6Q8|K0T6Q8_THAOC	Uncharacterized protein OS=Thalassiosira oceanica GN=THAOC_12984 PE=3 SV=1	gi|383762068|ref|YP_005441050.1|	520	0	COG0165	Argininosuccinate lyase	E	Amino acid transport and metabolism	K01755|1|7e-177|506|cvr:CHLNCDRAFT_26929| argininosuccinate lyase [EC:4.3.2.1]	GO:0042450//arginine biosynthetic process via ornithine	GO:0004056//argininosuccinate lyase activity	GO:0005737//cytoplasm
63	XP_002293973.1	26S proteasome regulatory ATPase subunit, partial [Thalassiosira pseudonana CCMP1335]	47614.6	0.162	3	3	EED88982.1	0.57	0.024	4	0.00012	XP_002293973.1	PPPLDSDDIALLKSYGLGPYSVPIKEIEEEIKKHQQTVKDLIGIKESDTGLSQPSQWDLVGDKQMMQEEAPLQVARCTKIIAGEDSHAAGGAAAANNDNPTAQLAGNKYVINVKQFAKFVVGLGEKVAPTDIEEGMRVGVDRAKYSIQIPLPPKIDPTVSLMTVEDKPDVTYEDVGGAKDALEKLREVLETPLLHPERFVALGIEPPKGVLLYGPPGTGKTLTARAVANRTDACFIRVIGSELVQKYVGEGARMVRELFTMARSKRACIIFFDEVDAIGGTRSGSDDNGSDNEVQRTMLQIVTELDGFDARGNIKVLMATNRPDTLDPALLRPGRLDRKVEFGLPDLEGRGHILKIHSKRMNCDRDIRFELVARLCPNTTGAELHSVCTEAGMFAIRAR…	100	0	gi|224010030|ref|XP_002293973.1|	26S proteasome regulatory ATPase subunit [Thalassiosira pseudonana CCMP1335]	77.73	0	sp|Q41365|PRS7_SPIOL	26S proteasome regulatory subunit 7 OS=Spinacia oleracea GN=RPT1 PE=2 SV=1	100	0	tr|B8CCP1|B8CCP1_THAPS	26S proteasome regulatory ATPase subunit (Fragment) OS=Thalassiosira pseudonana GN=RPT1 PE=3 SV=1	gi|11499558|ref|NP_070800.1|	333	6e-110	COG1222	ATP-dependent 26S proteasome regulatory subunit	O	Posttranslational modification, protein turnover, chaperones	K03061|1|0.0|670|bvg:104899665| 26S proteasome regulatory subunit T1	GO:0030163//protein catabolic process;GO:0006508//proteolysis	GO:0008233//peptidase activity;GO:0005524//ATP binding;GO:0017111//nucleoside-triphosphatase activity	GO:0005737//cytoplasm;GO:0000502//proteasome complex;GO:0005634//nucleus
64	EJK47930.1	hypothetical protein THAOC_33313 [Thalassiosira oceanica]	45379.2	0.076	2	4	-	0.63	0.071	4	0.00356	EJK47930.1	MGKKAKSSAGKKKAADRKIDRSALPPPPPKPEDEVGSAKPLDKPALPGTGFKVLGEEGYDDGGVADLSLLIDLEDSVQRRKRGENEYFTALKADLLPRATRGPMAKMTRREQKVSLAQLLFSEDDDCEDKGPSEVYVEHNVDDEDETVIKHRSDRLAQARAALRLSLLLREPACASLSLSELCKRKLTQAGKNGAEEALRCANKAIEIAGPGFWDSDEVQLEAEDNPVLDPKYEKNATSPGLANPTTLKLLPIRVSQLCMRSSLLQKGNALAAMGKEDDARAIYEEVFPILESEPRCARVDWERHSVHVNIGNTFAREGNFDKADEHYTIAQQLGEDHVKEKGGSEEDGRSMLLCAKRARAFALKKVGRDDEAKALLAEVIKQKISDDEAAKKKKEEEA…	100	0	gi|397571726|gb|EJK47930.1|	hypothetical protein THAOC_33313 [Thalassiosira oceanica]	-	-	-	-	100	0	tr|K0R5C2|K0R5C2_THAOC	Uncharacterized protein OS=Thalassiosira oceanica GN=THAOC_33313 PE=4 SV=1	-	-	-	-	-	-	-	-	-	-	-
65	EJK59156.1	hypothetical protein THAOC_20657 [Thalassiosira oceanica]	70312.1	0.032	1	1	-	0.65	0.152	4	0.03223	EJK59156.1	MTVHPKLQPRSPVPSDIEVSQQIVSEVGLLPIADLASEAGLEPDEVIPWGFSKAKVQLKTTLDRLKHSPDGNYIVCTGINPTPLGEGKSTTTIGLAQALGAILNKKSFACIRQPSQGPTFGIKGGAAGGGYAQVVPMEEFNLHLTGDIHAITAANNLLAAAIDTRMLHEDSQSDEALYKRLCLSGKPFPPVMKKRLVKLGIDPNKSPEDLTAEERAKFARLDFAKETITWQRVLDTCDRHLRKVTVGKGQTIQPRGTVKGETPREEHIRETGFDITVASEIMAVLALANDLPDLREKLGNMVVGYSKAGEPITSDDLGCGGALTVLMKDALLPTLMQTVERTPVLVHAGPFANIAIGNSSIVADKLALKLAGEDGYVVTEAGFGADIGMEKFFNIKCRE…	100	0	gi|397605931|gb|EJK59156.1|	hypothetical protein THAOC_20657 [Thalassiosira oceanica]	61.57	0	sp|P28723|FTHS_SPIOL	Formate--tetrahydrofolate ligase OS=Spinacia oleracea PE=1 SV=3	100	0	tr|K0SDZ3|K0SDZ3_THAOC	Uncharacterized protein OS=Thalassiosira oceanica GN=THAOC_20657 PE=3 SV=1	gi|383763379|ref|YP_005442361.1|	748	0	COG2759	Formyltetrahydrofolate synthetase	F	Nucleotide transport and metabolism	K01938|1|0.0|777|csl:COCSUDRAFT_52184| formate--tetrahydrofolate ligase [EC:6.3.4.3]	GO:0009396//folic acid-containing compound biosynthetic process;GO:0006730//one-carbon metabolic process	GO:0005524//ATP binding;GO:0004329//formate-tetrahydrofolate ligase activity	GO:0009536//plastid
66	sp|A0T0Z4.1|RPOA_THAPS	RecName: Full=DNA-directed RNA polymerase subunit alpha; Short=PEP; AltName: Full=Plastid-encoded RNA polymerase subunit alpha; Short=RNA polymerase subunit alpha	35229.8	0.118	1	2	YP_009093523.1;ABK20829.1;YP_874606.1;AIR76196.1;YP_004072643.1;ADB27596.1	0.61	0.106	4	0.01044	sp|A0T0Z4.1|RPOA_THAPS	MNSSNLLMECIKSEKIESGPMYGQFLIDSLSSGQGITIGNLLRRVLLGDLQGTAITGVRIAGVKDEFSLIPGVREDILEILLNLKGIVLKSKTPNRQFGRLRLQGPAVITASSIQLPPEIEIINPNHYIATISSSHILEIEFKIESGSKYRLANELFSDKFEDFIETDAIFMPVQKVDFKVENVYDNSNNIKERLLIDIWTNGSISPEQAIFSGSNLIINLFKSIGEQKINKEKENIKEKNHIKPIDPYTHIAIEELQLSVRPYNCLKRAQINTIGDLLDYSPEKLLELKNFGRKSADEVFATLKNKLGIVLK	100	0	gi|118411212|ref|YP_874606.1|	DNA-directed RNA polymerase alpha chain [Thalassiosira pseudonana]	100	0	sp|A0T0Z4|RPOA_THAPS	DNA-directed RNA polymerase subunit alpha OS=Thalassiosira pseudonana GN=rpoA PE=3 SV=1	91.69	0	tr|A0A089VIV1|A0A089VIV1_THAWE	DNA-directed RNA polymerase subunit alpha OS=Thalassiosira weissflogii GN=rpoA PE=3 SV=1	gi|113476555|ref|YP_722616.1|	315	1e-105	COG0202	DNA-directed RNA polymerase, alpha subunit/40 kD subunit	K	Transcription	K03040|1|9e-56|190|ppp:PHYPADRAFT_168194| DNA-directed RNA polymerase subunit alpha [EC:2.7.7.6]	GO:0006351//transcription, DNA-templated	GO:0003899//DNA-directed RNA polymerase activity;GO:0003677//DNA binding;GO:0046983//protein dimerization activity	GO:0009507//chloroplast
67	XP_002294138.1	predicted protein, partial [Thalassiosira pseudonana CCMP1335]	12983.6	0.087	1	5	EED88493.1;EJK74848.1	0.48	0.119	4	0.00923	XP_002294138.1	LKKALIHDGLRKGLHECAKALDRRSARLCCLAKDCENEEYKKLIRALCAEGEVSVIMVDSGKDLGAWCGLAKLDAEGEVKKAVRTSCAVITDFGEETRALTVLLDYLQKQADGEE	100	2e-76	gi|224010361|ref|XP_002294138.1|	predicted protein [Thalassiosira pseudonana CCMP1335]	55.45	3e-37	sp|Q9SMI3|RS12_CYAPA	40S ribosomal protein S12 OS=Cyanophora paradoxa GN=RPS12 PE=2 SV=1	100	4e-75	tr|B8CDP0|B8CDP0_THAPS	40S ribosomal protein S12 (Fragment) OS=Thalassiosira pseudonana GN=THAPSDRAFT_37628 PE=3 SV=1	gi|332796280|ref|YP_004457780.1|	57	7e-10	COG1358	Ribosomal protein L7Ae or related RNA K-turn-binding protein	J	Translation, ribosomal structure and biogenesis	K02951|1|2e-38|129|apro:F751_2593| small subunit ribosomal protein S12e	GO:0042221//response to chemical;GO:0006412//translation	GO:0003735//structural constituent of ribosome;GO:0003723//RNA binding	GO:0022626//cytosolic ribosome;GO:0015935//small ribosomal subunit;GO:0009536//plastid
68	XP_002289446.1	precursor of synthetase [Thalassiosira pseudonana CCMP1335]	31570.9	0.07	2	14	EED92983.1	0.62	0.072	4	0.003492	XP_002289446.1	MSANAKVWIDKDTRVICQGFTGKQGTFHSTQAIEYGTNMVGGVTPKKGGQEHLGLPVFDSVADAVLEVKPDASVIYVPPPYCAAAILDAIENEIPLVVAITEGVPQQDMVRVKKALLSQDKTRLIGPNCPGIIKPGECKIGIMPGYIHKAGKIGVVSRSGTLTYEAVHQTTVTGLGQSTCVGIGGDPFNGTNFIDCLERFRDDPQTEGIIMIGEIGGSAEEEAAEWWANNGDPNKPVVGFIAGMTAPPGRRMGHAGAIVAGGKGGANEKFAALEAAGIHVTRSPAQLGTTMMRAMGLAE	100	0	gi|223999547|ref|XP_002289446.1|	precursor of synthetase [Thalassiosira pseudonana CCMP1335]	71.97	1e-128	sp|Q8GTQ9|SUCA1_SOLLC	Succinate--CoA ligase [ADP-forming] subunit alpha-1, mitochondrial OS=Solanum lycopersicum GN=SCOA PE=1 SV=1	100	0	tr|B8C013|B8C013_THAPS	Succinate--CoA ligase [ADP-forming] subunit alpha, mitochondrial OS=Thalassiosira pseudonana GN=SCS2 PE=3 SV=1	gi|389878864|ref|YP_006372429.1|	414	4e-145	COG0074	Succinyl-CoA synthetase, alpha subunit	C	Energy production and conversion	K01899|1|7e-135|388|ota:Ot03g05850| succinyl-CoA synthetase alpha subunit [EC:6.2.1.4 6.2.1.5]	GO:0008152//metabolic process	GO:0004776//succinate-CoA ligase (GDP-forming) activity;GO:0046872//metal ion binding;GO:0003878//ATP citrate synthase activity;GO:0004775//succinate-CoA ligase (ADP-forming) activity;GO:0048037//cofactor binding;GO:0000166//nucleotide binding	GO:0044464//cell part
69	EED92490.1	pyruvate phosphate dikinase [Thalassiosira pseudonana CCMP1335]	103173	0.025	2	2	XP_002290738.1	2.01	0.153	4	0.0003438	EED92490.1	MVINSQYIYPFGGSAPKPTVDPDKQIVGGKGLGLQVMFKIGVDVPPGFTLTTPLCQVYAKQNDLPADVWKGVRENVRRIEIDMEKEFGSNENPLLFSCRSGAAMSMPGMMDTVLNIGLNDITVDGLAKATGNDRFAWDSYRRLLDMFGEVVLGISHEDFEKRFDKVKEAANAKSDVDLGVEDLKKLCDEYKQVYLEEGKVFPMDPYEQLYACVKAVFGSWMTPRAVKYREINNIKNLIGTATNIQTMVFGNMGDDSGTGVAFSRNPSTGENLMYGEYLINAQGEDVVAGIRTPQPISQMQEVLPDAYAKFLENVDKLEHYFKDMQDVEFTVEKGQLWMLQCRNGKRTGVAAIRIATELVEEGICTKSEALLKVEPRHVEQLLHPTFSPEALKSVAYTEG…	100	0	gi|224002132|ref|XP_002290738.1|	pyruvate phosphate dikinase [Thalassiosira pseudonana CCMP1335]	53.42	0	sp|Q42910|PPDK_MESCR	Pyruvate, phosphate dikinase, chloroplastic OS=Mesembryanthemum crystallinum GN=PPD PE=2 SV=1	100	0	tr|B8C332|B8C332_THAPS	Pyruvate, phosphate dikinase OS=Thalassiosira pseudonana GN=PDK1_2 PE=3 SV=1	gi|268316505|ref|YP_003290224.1|	922	0	COG1080	Phosphoenolpyruvate-protein kinase (PTS system EI component in bacteria)	G	Carbohydrate transport and metabolism	K01006|1|0.0|930|gra:105777958| pyruvate, orthophosphate dikinase [EC:2.7.9.1]	GO:0016310//phosphorylation	GO:0050242//pyruvate, phosphate dikinase activity;GO:0016301//kinase activity;GO:0005524//ATP binding	-
70	EJK66241.1	hypothetical protein THAOC_12850 [Thalassiosira oceanica]	12619.7	0.09	1	6	EED89937.1;XP_002292741.1	0.63	0.17	4	0.03744	EJK66241.1	MTKQNSQPVRLYVNGAILGYKRGLRNQYNHTSLIKIKGVDSKEETQFYLGKRIAYITKAKSSKNGSKFRVNWGRVCRAHGSNGVVKCKFARDLPPQSIGGRVRVMLYPSNV	100	8e-78	gi|397621342|gb|EJK66241.1|	hypothetical protein THAOC_12850 [Thalassiosira oceanica]	56.76	2e-41	sp|Q9FZH0|R35A2_ARATH	60S ribosomal protein L35a-2 OS=Arabidopsis thaliana GN=RPL35AB PE=3 SV=1	100	2e-76	tr|K0SZ17|K0SZ17_THAOC	Uncharacterized protein OS=Thalassiosira oceanica GN=THAOC_12850 PE=4 SV=1	gi|18978244|ref|NP_579601.1|	55.8	7e-10	COG2451	Ribosomal protein L35AE/L33A	J	Translation, ribosomal structure and biogenesis	K02917|1|8e-48|151|csl:COCSUDRAFT_68044| large subunit ribosomal protein L35Ae	GO:0006412//translation	GO:0003735//structural constituent of ribosome	GO:0005840//ribosome
71	XP_002287026.1	predicted protein, partial [Thalassiosira pseudonana CCMP1335]	28487.1	0.124	2	8	EED96667.1	0.52	0.016	4	2.906e-05	XP_002287026.1	AGALMVAGGLGYGAYNSVFTVDGGHRAVVFNRLLGMKPTIYNEGLNFNIPWFEWPVIYDIRTRPVNLQTLTGSKDLQMVTIGIRVLHRPDPNQLVWIYRHLGLNYDERILPSLMNECAKAVVARYDANELLTKREQVSAAISAELRLRAGGFNVLLEDVAITHLAFSPEYAKAVEAKQVAQQDANRAKYIVLGAQQEKKTIITKARGEAESAELIGSAVRRNPGFMKLRRIDAAKDIADIVAGSGNKVYLNADSLLLN	100	4e-170	gi|223994685|ref|XP_002287026.1|	predicted protein [Thalassiosira pseudonana CCMP1335]	55.47	2e-88	sp|A9UMS3|PHB2_XENTR	Prohibitin-2 OS=Xenopus tropicalis GN=phb2 PE=2 SV=1	100	1e-168	tr|B8BS69|B8BS69_THAPS	Uncharacterized protein (Fragment) OS=Thalassiosira pseudonana GN=THAPSDRAFT_17349 PE=4 SV=1	gi|89897250|ref|YP_520737.1|	134	2e-36	COG0330	Regulator of protease activity HflC, stomatin/prohibitin superfamily	O	Posttranslational modification, protein turnover, chaperones	K17081|1|8e-93|279|gsl:Gasu_02320| prohibitin 2			GO:0016020//membrane
72	AIR75633.1	ribosomal protein S3 (chloroplast) [Cyclotella sp. WC03_2]	24119	0.089	1	1	-	0.34	0.071	4	0.001865	AIR75633.1	MGQKTHPLGFRLGITQEHRSTWYTNFKHYPILLEEDDKIRTYLNKIAKLASISNIQINRNGLGDQIELNIETGRPGILVGDNGSNIKTLAANIKKIIPNNRQITINIVEVTNVNANASLIADLVVQQLEDRVAFRRAIREALQCAQDNQVNGIKIEVSGRLNGAEIARSEWIREGRVPLQTLRADIDYATKEANTIYGVLGVKVWLFKNEILKK	100	6e-155	gi|691190120|gb|AIR75633.1|	ribosomal protein S3 (chloroplast) [Cyclotella sp. WC03_2]	92.52	2e-145	sp|A0T0X9|RR3_THAPS	30S ribosomal protein S3, chloroplastic OS=Thalassiosira pseudonana GN=rps3 PE=3 SV=1	100	1e-153	tr|A0A089VNW1|A0A089VNW1_9STRA	30S ribosomal protein S3, chloroplastic OS=Cyclotella sp. WC03_2 GN=rps3 PE=3 SV=1	gi|427703075|ref|YP_007046297.1|	260	8e-87	COG0092	Ribosomal protein S3	J	Translation, ribosomal structure and biogenesis	K02982|1|2e-62|197|ppp:PhpapaCp067| small subunit ribosomal protein S3	GO:0006412//translation	GO:0003735//structural constituent of ribosome;GO:0019843//rRNA binding	GO:0015935//small ribosomal subunit;GO:0009507//chloroplast;GO:0005739//mitochondrion
73	EJK77671.1	hypothetical protein THAOC_00483 [Thalassiosira oceanica]	21420.3	0.118	2	2	EED91843.1;XP_002290091.1;EJK69567.1	0.64	0.13	4	0.0208	EJK77671.1	MYRVGVFVAFSSFCYWAVTQPSEFDGFVKGQGDFIKDLYAGTLLSDMSQKDKENIDKPKMPSLEDLLKKLDSEDDAEEQELSEEEAAEALLESLVDEEDEEIDEDAEDPGPSLSHSGSLGLSGSLGLGNNSLLPTPGCARVEGVPKLKLDICVAIANSDGGLSSSWYTMLLHQRTHIEFEENAARKVLEGGMVVR	100	8e-37	gi|397647363|gb|EJK77671.1|	hypothetical protein THAOC_00483 [Thalassiosira oceanica]	-	-	-	-	100	2e-35	tr|K0TP58|K0TP58_THAOC	Uncharacterized protein OS=Thalassiosira oceanica GN=THAOC_00483 PE=4 SV=1	-	-	-	-	-	-	-	-	GO:0015031//protein transport	GO:0008565//protein transporter activity	GO:0016021//integral component of membrane
74	EED95896.1	adenine nucleotide translocator; ATP/ADP translocase [Thalassiosira pseudonana CCMP1335]	32500.6	0.245	7	18	XP_002286255.1	0.55	0.19	4	0.03567	EED95896.1	MSDFMINFLAGGVSGAVAKTCTAPIERVKLLIQTQDANPKIISGEVARYTGIVDCFSRVASEQGIGAFWRGNLTNIIRYFPTQAFNFAFKDGIKALFPRADKNTEFAKFFAINMASGGLAGAGSLMIVYPLDYARTRLASDVGSGKQQFSGLADCLKKTVASSGIGGLYNGIGVSIVGIIPYRGVYFGLFDTLSGLNPYQKDTNNMLRAGSKFACAQSSAIAAGYASYPMDTVRRRLQMQSEKPKEEWVYKGTADCFAKIMKDEGTSALFKGAGANALRTVGAAMVLVLYSEITAAVAASKE	100	0	gi|223993143|ref|XP_002286255.1|	adenine nucleotide translocator; ATP/ADP translocase [Thalassiosira pseudonana CCMP1335]	60.48	2e-112	sp|P31692|ADT_PARKE	ADP,ATP carrier protein OS=Parachlorella kessleri PE=3 SV=1	100	0	tr|B8BR30|B8BR30_THAPS	Adenine nucleotide translocator ATP/ADP translocase OS=Thalassiosira pseudonana GN=ANT1 PE=3 SV=1	-	-	-	-	-	-	-	K05863|1|7e-115|337|mis:MICPUN_108589| solute carrier family 25 (mitochondrial adenine nucleotide translocator), member 4/5/6/31	GO:0055085//transmembrane transport	GO:0005215//transporter activity	GO:0005743//mitochondrial inner membrane;GO:0016021//integral component of membrane
75	EJK60671.1	hypothetical protein THAOC_18934 [Thalassiosira oceanica]	34012.9	0.085	1	1	-	0.49	0.144	4	0.01563	EJK60671.1	MSLVQTYTEYFEVSPKNGLSQFQTMTAYLGGSAFQTVLDNPVTAYRQLVQQYAKDAAGKAVDPKVATAEATAVFKANPAAAAMSGLIPRIIGVGFKRVPKFGILLGLSFFLGEDGNISATAAFGASVLSAPFINPIRMIEKQQRAFFKTTGAEKPIMEIIRESAKKNFVPLFRGTIPLMGHSCASALLGLAGQPKLQKYIKGELSQHGVGNFTSGLLASAAVTPIYVGVTNPLSRLEVIMQTSRIDGKSIGVVEACREVANDSKQFGLRGVFRGQGLGIAKGILSLTAFHQGRIWLTEAFKNHNISNGSYKPKDVGSA	100	0	gi|397610133|gb|EJK60671.1|	hypothetical protein THAOC_18934 [Thalassiosira oceanica]	-	-	-	-	100	0	tr|K0SI55|K0SI55_THAOC	Uncharacterized protein OS=Thalassiosira oceanica GN=THAOC_18934 PE=4 SV=1	-	-	-	-	-	-	-	-	-	-	-
76	EJK74449.1	hypothetical protein THAOC_03871 [Thalassiosira oceanica]	58356.8	0.023	1	2	-	0.72	0.05	4	0.002555	EJK74449.1	MAFRKVYSQVSQSLSNEVLGSVGKECKVGCCLLLHPFTNDSIISVSGGDADLNKAWRRKRLVFDGDRREGGHQRDEPQASKHIVQQRVAAKSFAMPPKKGKKDAVVDDKYMRAARFGRVKNDLKMGFVGLPNVGKSTLTNLMSGAFHAEAANYPFCTIDPNMVKAIVPDQKFKYLASTWKPPSVVPAVLTIVDIAGLIKGASEGAGLGNAFLSHIAAVDGIFHLVRAFDSDDIIHVDDSVDPIRDLETIQSELCLKDKETLAKVVEKEKDRIRKEKQISRSSDPPLGETFQSAYDKCCKLIESNTPVQTYEDFSQGEVEIIRDFGLITTKPQIYVVNMSKKNFLRKGNKWLAKISEWVNSHGGGQIIPMSCEWEQEYMDLREDKEAQKAFVEQCEEEVK…	100	0	gi|397641056|gb|EJK74449.1|	hypothetical protein THAOC_03871 [Thalassiosira oceanica]	48.54	3e-117	sp|A0JPJ7|OLA1_RAT	Obg-like ATPase 1 OS=Rattus norvegicus GN=Ola1 PE=2 SV=1	100	0	tr|K0TBD2|K0TBD2_THAOC	Obg-like ATPase 1 OS=Thalassiosira oceanica GN=THAOC_03871 PE=3 SV=1	gi|407452826|ref|YP_006724551.1|	309	8e-100	COG0012	Ribosome-binding ATPase YchF, GTP1/OBG family	J	Translation, ribosomal structure and biogenesis	K19788|1|1e-147|432|mpp:MICPUCDRAFT_21002| obg-like ATPase 1		GO:0005525//GTP binding	-
77	YP_009093166.1	RNA polymerase beta (chloroplast) [Roundia cardiophora]	86059.5	0.051	3	4	YP_009093439.1;AIR76112.1;AIR75839.1	0.51	0.056	4	0.001175	YP_009093166.1	MIRSEKEFDYIKIKLASPLRILQWSHRKLPNGQFVGEVQKSETINYRTFKPEMDGLFCERIFGPSKSLECACGKYKRVRYEGLICERCGVELTESRVRRHRMGHINLIYPVTHVWYTNSRPNYIALLLEVEQCEKRLDTGWTEFAYPRDNKEKDIKDITEYKLSNVGCHTYLASPKALLNCKEFLKEKSKAKKSSIVNCYDERIKRIKLASLAYFIAEDEIAFYGLHWDLQQYRRCREFGFTGYPLKPYSQSRNRRRSTPKYLLRATPNYLIGAVLIKRELEKLNLDQEIVKTRNFIMLCSKILHKEQPFYNFSHWSRKWEYQRIYKLRDNSIKRIRILENLLTTGANPAWMIITILPVIPPALRPMIQLEGGRFATSDLNELYRRIITRNNRLLRLLE…	100	0	gi|700658161|ref|YP_009093166.1|	RNA polymerase beta (chloroplast) [Roundia cardiophora]	92.75	0	sp|A0T0R0|RPOC1_THAPS	DNA-directed RNA polymerase subunit beta' OS=Thalassiosira pseudonana GN=rpoC1 PE=3 SV=1	100	0	tr|A0A089X825|A0A089X825_9STRA	DNA-directed RNA polymerase subunit beta' OS=Roundia cardiophora GN=rpoC1 PE=3 SV=1	gi|311115092|ref|YP_003986313.1|	586	0	COG0086	DNA-directed RNA polymerase, beta' subunit/160 kD subunit	K	Transcription	K03046|1|6e-175|518|ccp:CHC_800| DNA-directed RNA polymerase subunit beta' [EC:2.7.7.6]	GO:0006351//transcription, DNA-templated	GO:0003899//DNA-directed RNA polymerase activity;GO:0003677//DNA binding	GO:0009507//chloroplast
78	EJK47732.1	hypothetical protein THAOC_33529 [Thalassiosira oceanica]	22182	0.04	1	1	-	0.7	0.101	4	0.01486	EJK47732.1	MASDGQITASTLVSPRLLSLDARANDEIEASLHNLPKPLMREFGHVFAEEHLKFEGGDAVDASALTLLAIPTNQRSREDLVAVGDHIEAEKDRLLNVFLDFGKFVCENIRSKGYWADYIDPCSGLPMISLNCNKVYSEVDGMECLLNYRAYNAGFCKILTHPRWGSAVYPATIFAYAPVAELHGLFEGKWDGASIKME	100	1e-147	gi|397571311|gb|EJK47732.1|	hypothetical protein THAOC_33529 [Thalassiosira oceanica]	30.67	2e-18	sp|Q6AYQ6|MMAD_RAT	Methylmalonic aciduria and homocystinuria type D homolog, mitochondrial OS=Rattus norvegicus GN=Mmadhc PE=2 SV=1	100	2e-146	tr|K0RM00|K0RM00_THAOC	Uncharacterized protein OS=Thalassiosira oceanica GN=THAOC_33529 PE=4 SV=1	-	-	-	-	-	-	-	K05678|1|1e-10|63.5|apro:F751_3881| ATP-binding cassette, subfamily D (ALD), member 4	GO:0008152//metabolic process	-	-
79	EJK74080.1	hypothetical protein THAOC_04262, partial [Thalassiosira oceanica]	89318.7	0.062	2	3	-	0.5	0.053	4	0.0009829	EJK74080.1	RERRKKEKSGQRDKESPEDGVGTGIKEGSAQRPSHPHQGWVRPARPDSESKMMSYLRPKLLCLACRTSVVTNDDGRPSLTRLGAICEQVSELHREGVEVIMVSSGATGMGKRLMRKHCRMSMTISEVTSFGNNLNMLDGSEHSNGNRIRSQSHTLADSKKTYDSACAAAGQFEMMNLYNSLFSQMEVNAAQVLLTSGDFLDESNLKNLRYSIQRLLDVGIIPIINENDAVSANRGYTEGDVFSDNDSMAALCARNFGCDLLILLTDVDGVYDRPPSEEGAKLLPFYSQSQCVGIGEKSKHGRGGMDSKISAAQSAVAPGSQCRACVVLSGTDLNSIRSITSKEHGLKQCETKGTLFVTPKSELEMQAMKEYEEMQSSNAESVSDSARIMATNSRDQARK…	100	0	gi|397640361|gb|EJK74080.1|	hypothetical protein THAOC_04262, partial [Thalassiosira oceanica]	45.71	0	sp|O04226|P5CS1_ORYSJ	Delta-1-pyrroline-5-carboxylate synthase 1 OS=Oryza sativa subsp. japonica GN=P5CS1 PE=2 SV=2	100	0	tr|K0T979|K0T979_THAOC	Uncharacterized protein (Fragment) OS=Thalassiosira oceanica GN=THAOC_04262 PE=3 SV=1	gi|307155232|ref|YP_003890616.1|	376	5e-121	COG0014	Gamma-glutamyl phosphate reductase	E	Amino acid transport and metabolism	K12657|1|0.0|550|bdi:100822226| delta-1-pyrroline-5-carboxylate synthetase [EC:2.7.2.11 1.2.1.41]	GO:0006561//proline biosynthetic process;GO:0055114//oxidation-reduction process	GO:0004349//glutamate 5-kinase activity;GO:0004350//glutamate-5-semialdehyde dehydrogenase activity	-
80	EED93167.1	exportin1 [Thalassiosira pseudonana CCMP1335]	124066	0.01	1	3	XP_002289630.1	0.57	0.015	4	2.594e-05	EED93167.1	MTSIEAAAQALLTPNPADFDVNLLDQVVTAAYNPVDPNRAVANKALMALQESPDVWTKADAILERAQNPQSRFFGLQVLDDAIRIRWKVLPPEQREGIKNYVVGKVIQISSDEALMKQERVFISKLNLTLVQILKQEWPHNWPSFIPDLVGSSKTSEVLCENNMQILKLLSEEVFDFSRDQMVTEKVKKLKESLNSEFAAIYHLCEFILEHSQRPSLLKVTLQTLQRFLTWIPLGFIFQTQLIDILLNKFFPEPIFRNDTLECLTEVGSLTDLEPEYDPLFRTLFAGFLTKLGAVFSPETELIGPFENGSEDDQIFIQRLALFLSGFFKAHLKVLETPDTQQSLITGLYYLVRVSEVDDVEIFRICLEAWHMLAFDLYQTENEFKMRLGSQSSVLNLGG…	100	0	gi|223999915|ref|XP_002289630.1|	exportin1 [Thalassiosira pseudonana CCMP1335]	50.93	0	sp|Q6P5F9|XPO1_MOUSE	Exportin-1 OS=Mus musculus GN=Xpo1 PE=1 SV=1	100	0	tr|B8C129|B8C129_THAPS	Exportin1 OS=Thalassiosira pseudonana GN=THAPSDRAFT_268616 PE=4 SV=1	-	-	-	-	-	-	-	K14290|1|0.0|1130|ppp:PHYPADRAFT_163030| exportin-1	GO:0006886//intracellular protein transport	GO:0008565//protein transporter activity	GO:0005622//intracellular
81	EED87369.1	probable tryptophanyl tRNA synthetase [Thalassiosira pseudonana CCMP1335]	45838.3	0.057	2	4	XP_002295303.1	0.74	0.128	4	0.04003	EED87369.1	MVVTAFEVSGNIDYDKLIDKFGSKPLTPYLLKRLENVTVKQGTVDRLHRFLRREIFFSHRDIEKISKEPTGPCPFYLYTGRGPSSSAMHLGHLVPFLFTAWLQKAFRCPLVIQMTDDEKFLFKGSYSSENAGDDNLRHFADLTIENAKDIIACNFIKEKTFLFSDLDYVGRMYPNIVRIWKAVTVNQVNGVFGFDATSNIGKAAFPAIQAAPSFGSSFPNVLGGGDSNAATLGCLIPCAIDQDPYFRLTRDIAHKLVPRHHPLQGKPSLIHSKFFPPLQGAQGKMSSSDGNSAVFLTDTPEEIERKIKVHAFSGGQETKKLQEELGADLDVDVSYQWLRFFLEDDEELERIGSEYGSGSGEFWSTGKVKAKLVQVLKDLISEHQARRDNVTEEVVKEWM…	100	0	gi|224013303|ref|XP_002295303.1|	probable tryptophanyl tRNA synthetase [Thalassiosira pseudonana CCMP1335]	54.06	1e-131	sp|P23612|SYWC_RABIT	Tryptophan--tRNA ligase, cytoplasmic OS=Oryctolagus cuniculus GN=WARS PE=2 SV=3	100	0	tr|B8CGR5|B8CGR5_THAPS	Probable tryptophanyl tRNA synthetase OS=Thalassiosira pseudonana GN=TPS1 PE=3 SV=1	gi|146304925|ref|YP_001192241.1|	320	3e-105	COG0180	Tryptophanyl-tRNA synthetase	J	Translation, ribosomal structure and biogenesis	K01867|1|7e-135|395|cme:CYME_CMG043C| tryptophanyl-tRNA synthetase [EC:6.1.1.2]	GO:0006436//tryptophanyl-tRNA aminoacylation	GO:0004830//tryptophan-tRNA ligase activity;GO:0005524//ATP binding	GO:0005737//cytoplasm
82	YP_874599.1	50S ribosomal protein L6 (chloroplast) [Thalassiosira pseudonana]	20750.3	0.07	1	1	sp|A0T0Y7.1|RK6_THAPS;ABK20822.1	0.43	0.169	4	0.02108	YP_874599.1	MSRIGKLPIKLPTTVEISHQSDATVQVINVKGKFGSLQRTLPEELKIEQIHNDNGSSLIVSFENQTRTNKSLQGLYRTLINNMVIGVTEQFVIILTLQGVGYRASVQGKSLVLNLGYSHPVEIDIPEGITVEVTQNTTLNIKACDKEQLGLFAAKVRAWRPPEPYKGKGILYKNEQILRKAGKSGKK	100	7e-135	gi|118411205|ref|YP_874599.1|	50S ribosomal protein L6 [Thalassiosira pseudonana]	100	1e-135	sp|A0T0Y7|RK6_THAPS	50S ribosomal protein L6, chloroplastic OS=Thalassiosira pseudonana GN=rpl6 PE=3 SV=1	73.8	1e-95	tr|A0A089X999|A0A089X999_THAWE	50S ribosomal protein L6, chloroplastic OS=Thalassiosira weissflogii GN=rpl6 PE=3 SV=1	gi|428305857|ref|YP_007142682.1|	182	3e-57	COG0097	Ribosomal protein L6P/L9E	J	Translation, ribosomal structure and biogenesis	K02933|1|1e-56|182|sot:102601925| large subunit ribosomal protein L6	GO:0006412//translation	GO:0003735//structural constituent of ribosome;GO:0019843//rRNA binding	GO:0005840//ribosome;GO:0009507//chloroplast;GO:0005739//mitochondrion
83	XP_002296153.1	cell division control protein, cdc2, cyclin-dependent kinase, cdk1, p34, partial [Thalassiosira pseudonana CCMP1335]	33966.5	0.115	2	5	ACI64870.1	0.57	0.054	4	0.001287	XP_002296153.1	YQKIEKPGSNLGEGTYGVVYKARDRQTGETVALKRIRLEVEDEGIPSTALREISLLRELTHENIVDLKDCVQQDGKLYLVFEFLDRDLKKALESYNGLLDPMLVKSYLFQMCRGLAFCHARGVMHRDLKPQNLLVSRNGDLKLADFGLARAFCPPIRPLTHEVVTLWYRPPEILLGSQTYAPPVDVWAIGTIFVEMVTKRPLFPGDSEIDELFKIFRQLGTPNEEVWPGVTALQDWNTAFPTWYKHDFSKVFLDNTDASAVDLLERLLAYSPKDRITAKDTLNHPYFDDLDKENV	100	0	gi|224005004|ref|XP_002296153.1|	cell division control protein, cdc2, cyclin-dependent kinase, cdk1, p34 [Thalassiosira pseudonana CCMP1335]	63.01	3e-130	sp|Q38772|CDC2A_ANTMA	Cell division control protein 2 homolog A OS=Antirrhinum majus GN=CDC2A PE=2 SV=2	100	0	tr|B5YMU1|B5YMU1_THAPS	Cell division control protein, cdc2, cyclin-dependent kinase, cdk1, p34 (Fragment) OS=Thalassiosira pseudonana GN=cdc2 PE=3 SV=1	gi|488776494|ref|YP_007945910.1|	122	1e-29	COG2815	PASTA domain, binds beta-lactams	M	Cell wall/membrane/envelope biogenesis	K02206|1|2e-131|377|mus:103970292| cyclin-dependent kinase 2 [EC:2.7.11.22]	GO:0007049//cell cycle;GO:0006468//protein phosphorylation;GO:0051301//cell division	GO:0005524//ATP binding;GO:0004693//cyclin-dependent protein serine/threonine kinase activity	-
84	EJK73841.1	hypothetical protein THAOC_04516 [Thalassiosira oceanica]	33302.1	0.386	1	1	-	0.61	0.131	4	0.01749	EJK73841.1	MLKPNTSIALHRHSHSVVDILPPESDSTVQLMSEKPDVTYKDIGGMDVQKQEVREAIELPLIQHHLYTQIGIDPPRGVLLYGPPGTGKTMMAKAVANATSATFISMVGSEFVQKYLGEGPRMVRDVFRLARENSPCVVFIDEIDAIATKRFDAQTGADREVQRILLELLNQMDGFDQTTNVKVIMATNRADTLDPALLRPGRLDRKIEFPQPDRRQKRMVFQAATSKMNLSDELDLEDYVNRSEKVSCADVASICAEAGLQAVRENRYVVLPKDFDKAYKRAVSNREKELLFYSI	100	0	gi|397639932|gb|EJK73841.1|	hypothetical protein THAOC_04516 [Thalassiosira oceanica]	75.93	2e-173	sp|Q9SEI4|PRS6B_ARATH	26S proteasome regulatory subunit 6B homolog OS=Arabidopsis thaliana GN=RPT3 PE=1 SV=1	100	0	tr|K0TJ12|K0TJ12_THAOC	Uncharacterized protein OS=Thalassiosira oceanica GN=THAOC_04516 PE=3 SV=1	gi|11499558|ref|NP_070800.1|	320	7e-107	COG1222	ATP-dependent 26S proteasome regulatory subunit	O	Posttranslational modification, protein turnover, chaperones	K03063|1|6e-176|495|gsl:Gasu_23300| 26S proteasome regulatory subunit T3	GO:0030163//protein catabolic process;GO:0006508//proteolysis	GO:0008233//peptidase activity;GO:0005524//ATP binding;GO:0017111//nucleoside-triphosphatase activity	GO:0005737//cytoplasm;GO:0000502//proteasome complex
85	EED88754.1	tom40-like protein, partial [Thalassiosira pseudonana CCMP1335]	30792.7	0.039	1	1	XP_002293745.1	0.51	0.116	4	0.009055	EED88754.1	SSCPNPGPLEAATWDVRRLVSLDTYDGVRVDISKQLSPYFAVVHSFHLGTSMLPDGRTSSYGFTTQMNDEEGFCMARVDPERGTMDGRIHKALFGGVAMAKLQVGTSSEGSNDQLLGEIDLGAQTWTANLKYGSMGGGNVFGCNYFQSVTPRLAMGGEGMYIGANGNMMSSYTAKYSFNPSNSGDGDERQGMLSLNYKRAITPSRVNIGASLECSPATLESQVMVGAEFNLTRSKMNVCVDGTGRIQSTLEAKLGREQGSPSLNFAAELDHGKSLMRFGYGLNIG	100	0	gi|224009574|ref|XP_002293745.1|	tom40-like protein [Thalassiosira pseudonana CCMP1335]	25.08	1e-18	sp|Q9LHE5|TO401_ARATH	Mitochondrial import receptor subunit TOM40-1 OS=Arabidopsis thaliana GN=TOM40-1 PE=1 SV=3	100	0	tr|B8CCD5|B8CCD5_THAPS	Tom40-like protein (Fragment) OS=Thalassiosira pseudonana GN=THAPSDRAFT_264164 PE=4 SV=1	-	-	-	-	-	-	-	K11518|1|1e-27|112|olu:OSTLU_34552| mitochondrial import receptor subunit TOM40	GO:0055085//transmembrane transport;GO:0044070//regulation of anion transport	GO:0008308//voltage-gated anion channel activity	GO:0005741//mitochondrial outer membrane
86	EJK58851.1	hypothetical protein THAOC_20986 [Thalassiosira oceanica]	25171.1	0.063	1	1	-	0.42	0.19	4	0.0272	EJK58851.1	MQTSSSWSDRISFSNATNRPSQSEVGEAGMEVSRKQRKLCATHRRYEDPKPWSLGDGGEKDTEEIPDIWYPSLVGRKLPIFWEATMAGVQPLSKKTCVKKRTKKFARHQSDLFVRIRNSSWRKPKGIDGRVRRRFKGALPMPSIGYGSNKKTRNVLPCGFKSVVVANVSELEMLMMHNRTYAATVAHSVSSRVRRQIVERAEQLAIRVTNAAAKLRAEEDA	100	3e-155	gi|397605017|gb|EJK58851.1|	hypothetical protein THAOC_20986 [Thalassiosira oceanica]	62.96	1e-49	sp|P62912|RL32_RAT	60S ribosomal protein L32 OS=Rattus norvegicus GN=Rpl32 PE=1 SV=2	100	8e-154	tr|K0SD22|K0SD22_THAOC	Uncharacterized protein OS=Thalassiosira oceanica GN=THAOC_20986 PE=4 SV=1	gi|18978179|ref|NP_579536.1|	83.6	8e-19	COG1717	Ribosomal protein L32E	J	Translation, ribosomal structure and biogenesis	K02912|1|3e-48|158|cre:CHLREDRAFT_191758| large subunit ribosomal protein L32e	GO:0006412//translation	GO:0046872//metal ion binding;GO:0003735//structural constituent of ribosome	GO:0005840//ribosome
87	EED88785.1	predicted protein [Thalassiosira pseudonana CCMP1335]	69519	0.023	1	1	XP_002293776.1	0.83	0.058	4	0.0121	EED88785.1	MAPPPGPLGSASAPTDDSDLEELISSPMSKNVKMVDLDSLTGDNANGGARSGGGFMNPLYVLTGACQLCLYTLGPRTSKCLLYTSVFLLLAVLSNTLFNPTAPTGIMGADYSAITSAYDLSLAKVHHWCIAGDNDSCKCEDPLEPTSRMEFKSWNAAHKANVADVNLYRAMYGNEPTMIDADSGRPRPPIDVAFLGESVVEAMDGRWLGKHVVTKNNGDDKKKPKIDKTFEKFFRKEKGAPVEGVALGIAGDGASNVLWRIQHDEMPYDFNPKVWWITLGMNDLTRMQCSEEIVVLGILRVVEEIRLRKPDAKIVINSLLPMVDFQDNGEVKMADFADFEGKDESKGEKYRKREVPSTFKVGGGNDDDEAGEEKRGERPKPKDGKGRKLKAHSQQRDTK…	100	0	gi|224009636|ref|XP_002293776.1|	predicted protein [Thalassiosira pseudonana CCMP1335]	28.8	1e-07	sp|Q15102|PA1B3_HUMAN	Platelet-activating factor acetylhydrolase IB subunit gamma OS=Homo sapiens GN=PAFAH1B3 PE=1 SV=1	100	0	tr|B8CCJ4|B8CCJ4_THAPS	Uncharacterized protein OS=Thalassiosira pseudonana GN=THAPSDRAFT_9880 PE=4 SV=1	gi|192361816|ref|YP_001980974.1|	63.2	1e-09	COG2755	Lysophospholipase L1 or related esterase	E	Amino acid transport and metabolism	-		GO:0016787//hydrolase activity	-
88	EJK49516.1	hypothetical protein THAOC_31602 [Thalassiosira oceanica]	43169	0.148	2	5	-	0.79	0.031	4	0.001229	EJK49516.1	MPLNTRYSLTIKGHASCSYWSGIQKKEGTGLGSDFGLVDITKHPGLTPILVPVSNAKEDRTPSCHNNQRQVGVSPLLTVHQVVSWVAPPRGSRFGLRFWTRQITKHPGLTPILVPVSNAKEDRTPSCHNNQRQVGRRHKSVDPINTMSRDSNYDHHISIFSPQGRLYQMEYAFKAASSASGLTGIALRGKDTAVVVTQRKVPDRLIVPTSVSHVHNVTAKIGVLATGMTADCHSAVQRMRYEAADFEFKYGYSIPPAVLAKRMADIAQVNTQSASMRPLAVVLMIVGIDDVKGPQVLKVDPAGHYLPFKGTASGSKEQEATNFLEKRVDNIPEYSFDETVRTAIVCLGSVLGSDFRGSEIEVAAVTGKDGKFRSLTEEEIEDHLNAIADDADS	100	0	gi|397575069|gb|EJK49516.1|	hypothetical protein THAOC_31602 [Thalassiosira oceanica]	59.18	3e-96	sp|Q9XG77|PSA6_TOBAC	Proteasome subunit alpha type-6 OS=Nicotiana tabacum GN=PAA1 PE=2 SV=1	100	0	tr|K0RKV0|K0RKV0_THAOC	Proteasome endopeptidase complex OS=Thalassiosira oceanica GN=THAOC_31602 PE=3 SV=1	gi|14520823|ref|NP_126298.1|	145	3e-39	COG0638	20S proteasome, alpha and beta subunits	O	Posttranslational modification, protein turnover, chaperones	K02730|1|6e-96|290|spen:107007611| 20S proteasome subunit alpha 1 [EC:3.4.25.1]	GO:0006511//ubiquitin-dependent protein catabolic process	GO:0004298//threonine-type endopeptidase activity	GO:0019773//proteasome core complex, alpha-subunit complex;GO:0005634//nucleus
89	XP_002286266.1	predicted protein [Thalassiosira pseudonana CCMP1335]	52636.9	0.06	2	4	EED95907.1	0.57	0.035	4	0.0003492	XP_002286266.1	MDKAEENAAIISAQKSISPTEWRKENNITVRGYGSSAGDSFPDPFIEFGDAPFSDSIQKTLKSAGFERPTFIQSQAWPIAINGSDMICVAKTGSGKTCGFLLPSFHQYFQSKATANKGGKGPIMLVLAPTRELACQILDETQKFGRPIGIRSVCCYGGSPKYAQIAALERGVECVIATPGRLNDLIEMKKANLSNVKFVVLDEADRMLDMGFEPQIRSIMGSVPDSTNRQTLLFSATWPKEIQRLAFDFLSDPIQINVGEINVLNANKDITQKIMMCSEDDKIDRLKEILTDLKHSKVIVFVGKKYVAHELANQLWDEGFAVDSLHGDREQWERTKVINAFKQGTLRLLIATDVAARGLDVKDVGVVVNYDMPVGVNGAEDYIHRIGRTGRAGAKGIAY…	100	0	gi|223993165|ref|XP_002286266.1|	predicted protein [Thalassiosira pseudonana CCMP1335]	49.76	4e-134	sp|Q5VQL1|RH14_ORYSJ	DEAD-box ATP-dependent RNA helicase 14 OS=Oryza sativa subsp. japonica GN=Os01g0172200 PE=2 SV=1	100	0	tr|B8BR52|B8BR52_THAPS	Uncharacterized protein OS=Thalassiosira pseudonana GN=THAPSDRAFT_31037 PE=3 SV=1	gi|291614701|ref|YP_003524858.1|	312	2e-100	COG0513	Superfamily II DNA and RNA helicase	L	Replication, recombination and repair	K12823|1|1e-140|424|lja:Lj2g3v1451720.1| ATP-dependent RNA helicase DDX5/DBP2 [EC:3.6.4.13]		GO:0003676//nucleic acid binding;GO:0005524//ATP binding;GO:0008026//ATP-dependent helicase activity	-
90	XP_002290907.1	cation transporting ATPase, partial [Thalassiosira pseudonana CCMP1335]	100263	0.08	2	7	EED91014.1	0.59	0.072	4	0.003142	XP_002290907.1	PQSTLRHPWHTLSINETITQLSLKDDLPKMGLSTEEACDRLAKYGPNQMAEKIKKTIWQRIWHQLNNVLVYVLITVAVVSLFTAWFQVALIVSVITLNTWIGIYQEGNAEKAADALKNMLSTDARVIRSGKEIMISAGEIVPGDVCLLGLGDKVPADMRLISVSNLATGEAALTGESVPIDKVTDAIPCENGMDPDQVPLGDRKNMSYSATLVAQGSGIGVAIATGDFTQIGTINLLVNNTQSIETDVLKQIDQISKYLFVAICTMCLGTFFVAFYYSDSYYKNALSSVNIALTCAVAMVPEGLEAIVTLVYSYAVKVMATQNAIVRALPAVETLGSVTVICSDKTGTLTQNIMSLTAFVTSNARYKNNGIKSAHPDDSFPVKNGESPSKDWIRSALAC…	100	0	gi|224002471|ref|XP_002290907.1|	cation transporting ATPase [Thalassiosira pseudonana CCMP1335]	37.09	3e-162	sp|Q73E41|BACA1_BACC1	Calcium-transporting ATPase 1 OS=Bacillus cereus (strain ATCC 10987 / NRS 248) GN=BCE_0519 PE=1 SV=1	100	0	tr|B8C4V7|B8C4V7_THAPS	Cation transporting ATPase (Fragment) OS=Thalassiosira pseudonana GN=THAPSDRAFT_262679 PE=3 SV=1	gi|317051434|ref|YP_004112550.1|	634	0	COG0474	Magnesium-transporting ATPase (P-type)	P	Inorganic ion transport and metabolism	K01537|1|8e-108|361|cam:101512366| Ca2+-transporting ATPase [EC:3.6.3.8]	GO:0008152//metabolic process;GO:0006812//cation transport	GO:0046872//metal ion binding;GO:0005524//ATP binding;GO:0008900//hydrogen:potassium-exchanging ATPase activity	GO:0016021//integral component of membrane
91	XP_002292510.1	predicted protein [Thalassiosira pseudonana CCMP1335]	40962.6	0.126	3	9	EED90485.1	0.75	0.095	4	0.01926	XP_002292510.1	MWSIPIASANRDLMACAQTGSGKTAGFLFPIIITMLRNGGTEPEGGVRGRRTYPECLVLAPTRELASQIQDEAQKFLYCTGIASVVVYGGADVRDQLRQIERGCDLLVATPGRLVDLIERGRLSMENVKFLVLDEADRMLDMGFEPQIRRIVEQEGMPHGDDRQTMMFSATFPANIQRLAGDFMRDYIFLTVGRVGSASENVVQSVEYVEQNDKLDALMRFLLTIQEGLILIFVETKRNCDFVEDILCERGFPACSIHGDKSQREREDSLRAFKTGRCPVLVATDVAARGLDIPNVTQVVNYDLPTNIDDYVHRIGRTGRAGNTGAALSFVNEKNSGVARELRELLEESGQEVPPWLNQMTSYGG	100	0	gi|224007100|ref|XP_002292510.1|	predicted protein [Thalassiosira pseudonana CCMP1335]	66.3	3e-156	sp|Q0UWA6|DED1_PHANO	ATP-dependent RNA helicase DED1 OS=Phaeosphaeria nodorum (strain SN15 / ATCC MYA-4574 / FGSC 10173) GN=DED1 PE=3 SV=1	100	0	tr|B8C8H3|B8C8H3_THAPS	Uncharacterized protein OS=Thalassiosira pseudonana GN=THAPSDRAFT_649 PE=3 SV=1	gi|478179930|ref|YP_007701003.1|	288	7e-93	COG0513	Superfamily II DNA and RNA helicase	L	Replication, recombination and repair	K11594|1|4e-156|454|csl:COCSUDRAFT_63003| ATP-dependent RNA helicase DDX3X [EC:3.6.4.13]		GO:0003676//nucleic acid binding;GO:0005524//ATP binding;GO:0008026//ATP-dependent helicase activity	-
92	XP_002290530.1	heat shock protein, HSP70, hsc70 [Thalassiosira pseudonana CCMP1335]	68481.6	0.095	6	19	EED92282.1	0.61	0.09	4	0.006684	XP_002290530.1	MSAEPIIGIDLGTTFSCVACWDDKTNKVEVIESPSGRTCPSWVSFTKEGKLVGTAAKSQVASNPRNTVYDIKRIIGRSFTDPVTAEECKNFPFEVSEGGAHGEPKIVVEWRGEKKELRPEEISAMVLAELKLAAERHLGREVKGAVITVPAHFNNQQRQATKDAGRIAGLDVKRIINEPTAAALSYGLHAKKEREESGAEQKKANVVIFDLGGGTFDVSVLAMDSGVFEVKATGGDTHLGGEDFDNSVMKWCLEQIKAKNADVWAKLQDNPRAQSRLRRAVENAKRTLSSSMSTEIEVDSLVGDFDFTVTLDRAKFEELNAVLFKRCIDTVNEVLNDAGCSQDEVTDLVLVGGSTRIPSLQTSLYDMFGGRIELCKSVHPDEAVAHGAAVQGHILATGG…	100	0	gi|224001716|ref|XP_002290530.1|	heat shock protein, HSP70, hsc70 [Thalassiosira pseudonana CCMP1335]	48.34	0	sp|Q5NVM9|HSP7C_PONAB	Heat shock cognate 71 kDa protein OS=Pongo abelii GN=HSPA8 PE=2 SV=2	100	0	tr|B8C1V0|B8C1V0_THAPS	Heat shock protein, HSP70, hsc70 OS=Thalassiosira pseudonana GN=HSP70_3 PE=3 SV=1	gi|218961071|ref|YP_001740846.1|	461	2e-153	COG0443	Molecular chaperone DnaK (HSP70)	O	Posttranslational modification, protein turnover, chaperones	K03283|1|0.0|557|adu:107459962| heat shock 70kDa protein 1/8	GO:0006950//response to stress	GO:0005524//ATP binding	-
93	EJK73006.1	hypothetical protein THAOC_05399 [Thalassiosira oceanica]	31553.1	0.187	2	4	-	0.6	0.053	4	0.00137	EJK73006.1	MWNGCLCLQCIREKEVGVVEDLGQFKRLVGEGPSCILWPLQSVTGRLSLRVQQLDVLCETKTKDNVFVQVGVAVQYRVVTESAYDAWYRLTSPTSQIQAYVFDVIRSTIPRMELDQAFESKDDIAHSVLESLQQVMKDYGYSIVNTLVTDLAPDTKVKASMNEINAARRLKEAASHQAEADKVRQVKAAEADAEARYLSGLGVARQRKAIVKGLQASVSEFSSEVEGADPKDVMDILLLSQYFDTLSTVGANSLILEHDPATVANLQQQVGVSFMAKRQDLLS	100	0	gi|397638309|gb|EJK73006.1|	hypothetical protein THAOC_05399 [Thalassiosira oceanica]	50.91	1e-86	sp|Q5GI04|HIR1_CAPAN	Hypersensitive-induced reaction 1 protein OS=Capsicum annuum GN=HIR1 PE=1 SV=1	100	0	tr|K0TH55|K0TH55_THAOC	Uncharacterized protein OS=Thalassiosira oceanica GN=THAOC_05399 PE=4 SV=1	gi|430742193|ref|YP_007201322.1|	265	2e-86	COG0330	Regulator of protease activity HflC, stomatin/prohibitin superfamily	O	Posttranslational modification, protein turnover, chaperones	-			GO:0016020//membrane;GO:0044444//cytoplasmic part;GO:0043231//intracellular membrane-bounded organelle
94	EED86453.1	predicted protein, partial [Thalassiosira pseudonana CCMP1335]	45447.8	0.09	3	5	XP_002297246.1	0.68	0.152	4	0.03684	EED86453.1	QASVSVRPDWRRVEEVDLSKLSKGTSPLSGMVDNSPPKKVEDLAWCGFLDQYNDQYDKVSTRTPAPLKRIENKEFYPVTTTDDPVIEKLAIEGKGTVFATDAILAHLMTCPRSVYPWDVVVQKLPTGALFFDKRDASQFDYLTVHETSNTPPAPVNERDNINENDNEALMNTPERLSLEATMINQNFTQQILRSSKYRSKMDLPNPFWDEEDNDGMEPASVAYRYRKFDLGDGIELVARTELHGLAKKKGNQYMTAYALNEYDPSYAANAPPARPGTSINWREKIDNQAGAVLASELKNNSFKLAKWTAQSLLAGASQMKIGFVSRINPKNAYEHTILATQSYRPMDFATQITLNQGTMWGIMRLFIKLLEDQPEGKYVIMRDPNRAIVRIYGVPVGTF…	100	0	gi|224015173|ref|XP_002297246.1|	predicted protein [Thalassiosira pseudonana CCMP1335]	48	5e-120	sp|K7IM66|EIF3D_NASVI	Eukaryotic translation initiation factor 3 subunit D OS=Nasonia vitripennis PE=1 SV=1	100	0	tr|B8LDZ2|B8LDZ2_THAPS	Predicted protein (Fragment) OS=Thalassiosira pseudonana GN=THAPSDRAFT_bd96 PE=4 SV=1	-	-	-	-	-	-	-	K03251|1|1e-117|350|ppp:PHYPADRAFT_131898| translation initiation factor 3 subunit D	GO:0006413//translational initiation	GO:0003743//translation initiation factor activity	-
95	EED91852.1	RS23, ribosomal protein 23 40S small ribosomal subunit [Thalassiosira pseudonana CCMP1335]	15876.6	0.154	2	3	EJK47606.1;XP_002290100.1	0.48	0.178	4	0.02655	EED91852.1	MGKPAGIRTGRKLRIHRRNQRWHDLKYTKAHSVTAMKANPMGGSTMAKGIVLEKIGIEAKQPNSAIRKCVRVQLIKNGKKIAAFVPRDGCLNYVDENDEVLVAGFGRSGHAVGDIPGVRFKCVKVAGVSLLALYKEKKEKPRS	100	5e-102	gi|224000856|ref|XP_002290100.1|	RS23, ribosomal protein 23 40S small ribosomal subunit [Thalassiosira pseudonana CCMP1335]	81.82	1e-82	sp|Q86FP7|RS23_DERVA	40S ribosomal protein S23 OS=Dermacentor variabilis GN=RpS23 PE=2 SV=1	100	1e-100	tr|B8C1Z7|B8C1Z7_THAPS	RS23, ribosomal protein 23 40S small ribosomal subunit OS=Thalassiosira pseudonana GN=RS23 PE=3 SV=1	gi|118575640|ref|YP_875383.1|	167	1e-52	COG0048	Ribosomal protein S12	J	Translation, ribosomal structure and biogenesis	K02973|1|3e-79|233|ccp:CHC_T00010305001| small subunit ribosomal protein S23e	GO:0006412//translation	GO:0003735//structural constituent of ribosome	GO:0033009//nucleomorph;GO:0015935//small ribosomal subunit
96	EJK55379.1	hypothetical protein THAOC_24887 [Thalassiosira oceanica]	71794.6	0.281	2	4	-	0.34	0.117	4	0.00799	EJK55379.1	MKFAALFVAGLAGADAFAPANHGRTARTSPLFDMPDAPEATSIVKDAGDMPVIQSRGGAPVDVRYSDFLKLVNGDKIEKVTFSADGTQLLGVDTDGTRIKLEALPNDPDLLTQLTTHKVDVTVLPSNEAAGGLGDLAQSLILPAALFAGLFFLSRRSGGGMPGGMGGPGNPMGMGKSKAEIQMIPDTGVNFEDVAGCDGAKAELVEVVDFLKQPEVYSKNGCRIPRGVILDGPPGTGKTLLAKAVAGEAGVPFISISGSEFVEMFVGVGASRVRDIFSQAKKNAPCIIFIDEIDAVGRQRGAGFAGGNDEREQTINQILVEMDGFDGNPGIITIAATNRVDILDQALLRPGRFDRKITVDLPDFKGRTRILGVHARGKPLEPDVDLEAIGRRTPGFSGA…	100	0	gi|397591488|gb|EJK55379.1|	hypothetical protein THAOC_24887 [Thalassiosira oceanica]	57.88	0	sp|P72991|FTSH3_SYNY3	ATP-dependent zinc metalloprotease FtsH 3 OS=Synechocystis sp. (strain PCC 6803 / Kazusa) GN=ftsH3 PE=1 SV=1	100	0	tr|K0RSP2|K0RSP2_THAOC	Uncharacterized protein OS=Thalassiosira oceanica GN=THAOC_24887 PE=3 SV=1	gi|16329602|ref|NP_440330.1|	660	0	COG0465	ATP-dependent Zn proteases	O	Posttranslational modification, protein turnover, chaperones	K03798|1|0.0|731|ccp:CHC_T00009248001| cell division protease FtsH [EC:3.4.24.-]	GO:0030163//protein catabolic process;GO:0006508//proteolysis;GO:0006200//ATP catabolic process	GO:0008270//zinc ion binding;GO:0004222//metalloendopeptidase activity;GO:0016887//ATPase activity;GO:0005524//ATP binding	GO:0016020//membrane;GO:0009507//chloroplast;GO:0009579//thylakoid
97	XP_002293898.1	RS5, ribosomal protein 5 [Thalassiosira pseudonana CCMP1335]	24648.7	0.133	1	4	EED88907.1	0.33	0.099	4	0.003581	XP_002293898.1	MADVEDPIEEPVEVEEEEEEEFVAVGGATEVKLFGKWSFDDIEIRDISLVDYIACKGDHATYLPHTAGRYQKKRFRKASCPIVERLACCLMRKGRNSGKKLMAVRIVQHTLEIIHLLTDQNPVQVVVDAIINSGPREDSTRVGGAGVVRRQAVDMSPFRRVNYALYLLATGAREASFRNLKTVAECLAEELVNAARGSSNSYAIKKKDEIERVSKSNR	100	5e-128	gi|224009880|ref|XP_002293898.1|	RS5, ribosomal protein 5 [Thalassiosira pseudonana CCMP1335]	73.94	5e-99	sp|O65731|RS5_CICAR	40S ribosomal protein S5 (Fragment) OS=Cicer arietinum GN=RPS5 PE=2 SV=1	100	1e-126	tr|B8CC69|B8CC69_THAPS	RS5, ribosomal protein 5 OS=Thalassiosira pseudonana GN=RS5 PE=3 SV=1	gi|124028426|ref|YP_001013746.1|	204	4e-65	COG0049	Ribosomal protein S7	J	Translation, ribosomal structure and biogenesis	K02989|1|8e-103|298|vcn:VOLCADRAFT_120316| small subunit ribosomal protein S5e	GO:0006412//translation	GO:0003735//structural constituent of ribosome;GO:0003723//RNA binding	GO:0022626//cytosolic ribosome;GO:0005773//vacuole;GO:0005886//plasma membrane;GO:0005618//cell wall;GO:0015935//small ribosomal subunit;GO:0009507//chloroplast
98	EED91187.1	gamma-glutamyl phosphate reductase [Thalassiosira pseudonana CCMP1335]	79111.2	0.083	2	4	XP_002291080.1	0.45	0.129	4	0.008458	EED91187.1	MATYTEPESRRALRNTRRILIKAGTSVVANDDGRPSLTRLGAICEQIAEIHRSGVQVIMVSSGATGMGKRLMRQHGRMNMSISEMASIGDGLDKLEMACAAAGQFEMMNLYNSLFSQMDVSAAQVLLTEGDFRSEDHLNNLHYSIERLLSVGIIPIINENDAVSANRGYTQGDLFSDNDSLAALCARSFACDLCILLTDVDGVFDRPPKEKGAKLLPFYSQNQSVGIGEKSKHGRGGMDSKINAAQFAVSPGSQTRACVVISGADLNAIRSVTSKEYDPTLSKGPKGTFAESVSAEAHRMATAARDQARKLQGLSHSERKTILYAVADELQAEKVALLAANKLDLEIAERDGTEFPLVSRLKLTEAKLATLSAGIRQIADQPDPLGVVKAKRELADGLV…	100	0	gi|224002817|ref|XP_002291080.1|	gamma-glutamyl phosphate reductase [Thalassiosira pseudonana CCMP1335]	48.35	0	sp|O04226|P5CS1_ORYSJ	Delta-1-pyrroline-5-carboxylate synthase 1 OS=Oryza sativa subsp. japonica GN=P5CS1 PE=2 SV=2	100	0	tr|B8C5V7|B8C5V7_THAPS	Delta-1-pyrroline-5-carboxylate synthase OS=Thalassiosira pseudonana GN=P5CS PE=3 SV=1	gi|307155232|ref|YP_003890616.1|	377	2e-122	COG0014	Gamma-glutamyl phosphate reductase	E	Amino acid transport and metabolism	K12657|1|0.0|595|bdi:100822226| delta-1-pyrroline-5-carboxylate synthetase [EC:2.7.2.11 1.2.1.41]	GO:0006561//proline biosynthetic process;GO:0055114//oxidation-reduction process	GO:0004349//glutamate 5-kinase activity;GO:0004350//glutamate-5-semialdehyde dehydrogenase activity	-
99	XP_002295897.1	predicted protein, partial [Thalassiosira pseudonana CCMP1335]	39904.2	0.031	1	1	ACI64614.1;EJK47042.1	0.56	0.13	4	0.01446	XP_002295897.1	SGGPLPQDLSDLTPAELNSVVPPAPLYKIVLTGGPCGGKTTSLARLSPYLRERGFEVITCPEAFSLLVSNGMAFDYLGAVDGMSAVVQDTVMDIQIGLEDGFERVLRARGKPAVLLCDRGLMDGSAYMKSEEWEKLMNKRDVGCVSELREGRYNAVFHLVTAAEGAEKFYTLDNNEVRTETPELARELDHMTRNAWVGHPNLKIFDNSTDFETKMQRVVEEMARLVGLPHSLERVTTKFLLKREPDLSAFPEGVAYQIFDVEKVYLYEESTSNHDNITKEYSFIRKRTSLNKDGQASGSKKRIITKREYNSLFNNRDKNRHVVRQKRISFLWNIQSFNVHVYQEPVHDIC	100	0	gi|224004492|ref|XP_002295897.1|	predicted protein [Thalassiosira pseudonana CCMP1335]	35.83	8e-68	sp|Q7K556|TTD14_DROME	TRPL translocation defect protein 14 OS=Drosophila melanogaster GN=Ttd14 PE=1 SV=1	100	0	tr|B5YNE1|B5YNE1_THAPS	Predicted protein (Fragment) OS=Thalassiosira pseudonana GN=THAPS_263228 PE=4 SV=1	gi|317055348|ref|YP_004103815.1|	188	4e-55	COG3911	Predicted ATPase	R	General function prediction only	-	GO:0044238//primary metabolic process;GO:0044260//cellular macromolecule metabolic process;GO:0016310//phosphorylation;GO:0007165//signal transduction	GO:0004673//protein histidine kinase activity;GO:0004871//signal transducer activity	-
100	XP_002289796.1	RS16, ribosomal protein 16 40S small ribosomal subunit [Thalassiosira pseudonana CCMP1335]	16173.7	0.252	2	9	EED93333.1	0.4	0.169	4	0.01913	XP_002289796.1	MPESQSVQVFGKKKTATACAFAKQGRGLIKVNGQPIENIEPECLRLKAFEPVLVLGQDKFANLDIRIRVKGGGFTAQIYAIRSAIAKSIIAYYAKYVDESSKNELRATLMAYDRNLLVADPRRREPKKYGGRSARARFQKSYR	100	8e-74	gi|224000247|ref|XP_002289796.1|	RS16, ribosomal protein 16 40S small ribosomal subunit [Thalassiosira pseudonana CCMP1335]	66.2	6e-47	sp|O22647|RS16_FRIAG	40S ribosomal protein S16 OS=Fritillaria agrestis GN=RPS16 PE=2 SV=1	100	2e-72	tr|B8BZD7|B8BZD7_THAPS	RS16, ribosomal protein 16 40S small ribosomal subunit OS=Thalassiosira pseudonana GN=RS16 PE=3 SV=1	gi|397772874|ref|YP_006540420.1|	134	1e-39	COG0103	Ribosomal protein S9	J	Translation, ribosomal structure and biogenesis	K02960|1|6e-49|157|mpp:MICPUCDRAFT_62402| small subunit ribosomal protein S16e			GO:0030529//ribonucleoprotein complex
101	ACI65072.1	translation initiation factor eIF-2, gamma subunit [Thalassiosira pseudonana CCMP1335]	52376.9	0.261	8	12	XP_002296355.1	0.6	0.066	4	0.002515	ACI65072.1	MEKSQPHLMAQDAATVDASKLTALTPEVISRQATINVGTIGHVAHGKSTVVKAISGVQTVRFKNELERNITIKLGYANAKIYKAAPPPAIEEGKEDTAATNTEVIPGTSYPMYTSRGSSHPDTFVDPKTNVTYHLRRHISFVDCPGHDILMATMLNGAAVMDGALLLVAGNETCPQPQTSEHLAAVEIMRLKNIIILQNKVDLVKMDAAIAQQEQIRKFVVGTVADSAPILPISAVLKYNVDLVCEYLVHKIPVPVRDFTSVPRLIVIRSFDVNKPGQDVSNLQGGVAGGSILQGVLRVGDEIEVRPGIVTKKENEDGGTTVVCSPIFSRISSLYAESNDLQYAVPGGLIGVGTRIDPTLTRADRLVGQVLGLRGKLPQVYAEIEISYYLLRRLLGVKT…	100	0	gi|224005408|ref|XP_002296355.1|	translation initiation factor eIF-2, gamma subunit [Thalassiosira pseudonana CCMP1335]	69.39	0	sp|Q9Z0N2|IF2H_MOUSE	Eukaryotic translation initiation factor 2 subunit 3, Y-linked OS=Mus musculus GN=Eif2s3y PE=1 SV=2	100	0	tr|B5YNZ5|B5YNZ5_THAPS	Translation initiation factor eIF-2, gamma subunit OS=Thalassiosira pseudonana GN=THAPS_7322 PE=4 SV=1	gi|15669447|ref|NP_248257.1|	378	5e-126	COG5257	Translation initiation factor 2, gamma subunit (eIF-2gamma; GTPase)	J	Translation, ribosomal structure and biogenesis	K03242|1|0.0|635|vcn:VOLCADRAFT_81202| translation initiation factor 2 subunit 3	GO:0006413//translational initiation;GO:0006184//GTP catabolic process	GO:0003743//translation initiation factor activity;GO:0003924//GTPase activity;GO:0005525//GTP binding	-
102	EJK45703.1	hypothetical protein THAOC_35666, partial [Thalassiosira oceanica]	98850.2	0.054	2	6	-	0.44	0.134	4	0.0116	EJK45703.1	ERRVDSPARVKSTHFFSKERAPVISNTIHRNDVRREEGREAAVLPVRQDPKPDQQALLRPRFEDSQRAFLTHILPLRPSFAPGQFVNEAVISQKVIQGVYPGVTTVELDELAAQTAASFATQHPDYAVLAARIEVSNLHKETEKQFSKVRPTEICGDCFRNYTHPKTGEPAPLVSEEVHSVVMANRDVLDGAILHDRDFEFDYFGFKTLEKSYLLKMHGQIAERPQHLLMRVAVGIHMGDIERVLETYNLLSQRFFTHATPTLFNAGTPNPQMSSCFLTCVREDSIDGIYDTLKNCAVISKYAGGIGLSISNVRASASYIRGTNGTSNGIVPMLRVFNNTARYVDQGGGKRKGSIAAYIEPWHADIFAFLDLRKNHGNEMERARDLFYALWIPDLFMER…	100	0	gi|397567645|gb|EJK45703.1|	hypothetical protein THAOC_35666, partial [Thalassiosira oceanica]	62.36	0	sp|Q9SJ20|RIR1_ARATH	Ribonucleoside-diphosphate reductase large subunit OS=Arabidopsis thaliana GN=RNR1 PE=1 SV=1	100	0	tr|K0R0K7|K0R0K7_THAOC	Ribonucleoside-diphosphate reductase (Fragment) OS=Thalassiosira oceanica GN=THAOC_35666 PE=3 SV=1	gi|256421018|ref|YP_003121671.1|	1067	0	COG0209	Ribonucleotide reductase alpha subunit	F	Nucleotide transport and metabolism	K10807|1|0.0|1074|cme:CYME_CMM323C| ribonucleoside-diphosphate reductase subunit M1 [EC:1.17.4.1]	GO:0006260//DNA replication;GO:0055114//oxidation-reduction process	GO:0005524//ATP binding;GO:0004748//ribonucleoside-diphosphate reductase activity, thioredoxin disulfide as acceptor	GO:0005971//ribonucleoside-diphosphate reductase complex
103	EED91592.1	chloroplast ftsH, partial [Thalassiosira pseudonana CCMP1335]	63053.2	0.067	3	5	XP_002291485.1	0.72	0.104	4	0.01977	EED91592.1	RYSQFLKLVAQLEKVTFSKDGSQLIGTSNAQPTQQPSQIRINYLPNDPTLLTTLTDHKVDISVSSFANLPAQRNFIASFLKRLLFPLSIFAGLFFLLKRSAGSSSPLGMARMKPSFNFHPTTNITFEDVAGCDGAKLELAEIVDFLKQPQAYTNNGCRIPAGALLYGPPGTGKTLLAKAVAGEAGVPFVSMSGSEFVELYVGVGASRVRELFFQAKKNAPCIVFLDEIDAVGRQRGAGYAGGNDEREQTINQILVEMDGFDGNIGVITLAATNRLDILDEALLRPGRFDRKISVDLPDVHGRTKILSVHSRGKPLEPDVDLDAIARRTPGFSGAELENLMNEAALSAARQGKETIGWMEVDGALDRLMVGMEKSGGTSYLSQKQKELVAYHEAGHAICG…	100	0	gi|224003627|ref|XP_002291485.1|	chloroplast ftsH [Thalassiosira pseudonana CCMP1335]	55.17	0	sp|P72991|FTSH3_SYNY3	ATP-dependent zinc metalloprotease FtsH 3 OS=Synechocystis sp. (strain PCC 6803 / Kazusa) GN=ftsH3 PE=1 SV=1	100	0	tr|B8C5Z2|B8C5Z2_THAPS	Chloroplast ftsH (Fragment) OS=Thalassiosira pseudonana GN=THAPSDRAFT_34824 PE=3 SV=1	gi|428778106|ref|YP_007169893.1|	615	0	COG0465	ATP-dependent Zn proteases	O	Posttranslational modification, protein turnover, chaperones	K03798|1|0.0|649|cme:CYME_CMQ295C| cell division protease FtsH [EC:3.4.24.-]	GO:0030163//protein catabolic process;GO:0006508//proteolysis;GO:0006200//ATP catabolic process	GO:0008270//zinc ion binding;GO:0004222//metalloendopeptidase activity;GO:0016887//ATPase activity;GO:0005524//ATP binding	GO:0016020//membrane;GO:0009507//chloroplast;GO:0009579//thylakoid
104	XP_002293195.1	predicted protein, partial [Thalassiosira pseudonana CCMP1335]	8598.17	0.13	1	11	EED89656.1;EJK75167.1	0.43	0.187	4	0.02504	XP_002293195.1	LYVGNLSFETTEESVRGLFEQYGQVTDCFLPTDRDSGRVRGFAFVTMPAKEAETACSKTNGAELDGRTLRVNEAQPK	100	2e-51	gi|224008472|ref|XP_002293195.1|	predicted protein [Thalassiosira pseudonana CCMP1335]	52.56	1e-22	sp|Q9WX39|RBPF_NOSS1	Putative RNA-binding protein RbpF OS=Nostoc sp. (strain PCC 7120 / SAG 25.82 / UTEX 2576) GN=rbpF PE=3 SV=3	100	6e-50	tr|B8CAB9|B8CAB9_THAPS	Uncharacterized protein (Fragment) OS=Thalassiosira pseudonana GN=THAPSDRAFT_20223 PE=4 SV=1	gi|302343499|ref|YP_003808028.1|	94	2e-25	COG0724	RNA recognition motif (RRM) domain	J	Translation, ribosomal structure and biogenesis	K12885|1|1e-16|74.3|ats:F775_28092| heterogeneous nuclear ribonucleoprotein G!K11294|2|1e-16|74.7|pop:POPTR_0006s12910g| nucleolin!K12741|4|2e-16|73.9|obr:102701775| heterogeneous nuclear ribonucleoprotein A1/A3		GO:0003676//nucleic acid binding;GO:0000166//nucleotide binding	-
105	EJK70163.1	hypothetical protein THAOC_08500 [Thalassiosira oceanica]	22522.3	0.033	1	1	-	0.62	0.09	4	0.006776	EJK70163.1	MMKIALCAALVTSAAAFAPQANNARPSVAVQAENSRREALSSIAAAAAVIAPAAANAAAGESPRFSVFGVIGDGTSYSEGAAYGSDQSSAVYSPYSVYGNVGSSDALYSANNAGEVERKKGFIAESQKRLSKLPAYVERKEWFNVKDELTRYMYETRGAVRGLAETPEQKKIAKSFFQAIEEASLQATLKNQDKCAAASADSAKLLDQFVASL	100	5e-109	gi|397631462|gb|EJK70163.1|	hypothetical protein THAOC_08500 [Thalassiosira oceanica]	-	-	-	-	100	1e-107	tr|K0SUU3|K0SUU3_THAOC	Uncharacterized protein OS=Thalassiosira oceanica GN=THAOC_08500 PE=4 SV=1	-	-	-	-	-	-	-	-			GO:0044425//membrane part
106	EJK50243.1	hypothetical protein THAOC_30820 [Thalassiosira oceanica]	83102	0.012	1	7	-	0.56	0.181	4	0.03397	EJK50243.1	MMVYGRAVLRSGIARKLLVPRRSVIATSNGFFDQEALASRRRLSPPSSRSAAVHSYSAPCSNLPAVRHLSTAAVEETDDDCAYTLKRREGIRNVAIVAHVDHGKTTLVDELLKVATSSTDIEGNETADDADLNRLMDSGELEKERGITITSKVTRLDYTSESNESYTINVVDTPGHADFAGEVDRILSTVDGVVLVVDAGEGPKSQTKYVLTRALSLGLVPIVVLNKADREESILRLEGGETELELMDLFEALGADADQMEYRTLYGSARGGWIADDVDVALKVVRENGGSESEGAMSMRGLLEAILEDIPSPSVHWYDESSDDSAKREASEFENEPFSMAATTVGFDSYLGRTCTGRIYSGDSITLLPRLDSDSAVSEGTGPKSQVSGVFANRGVSRV…	100	0	gi|397576407|gb|EJK50243.1|	hypothetical protein THAOC_30820 [Thalassiosira oceanica]	39.1	2e-145	sp|Q9ZLZ3|TYPA_HELPJ	GTP-binding protein TypA/BipA homolog OS=Helicobacter pylori (strain J99 / ATCC 700824) GN=typA PE=3 SV=1	100	0	tr|K0R9J8|K0R9J8_THAOC	Uncharacterized protein OS=Thalassiosira oceanica GN=THAOC_30820 PE=4 SV=1	gi|209967185|ref|YP_002300100.1|	507	5e-170	COG1217	Predicted membrane GTPase involved in stress response	T	Signal transduction mechanisms	K06207|1|2e-154|467|mpp:MICPUCDRAFT_1275| GTP-binding protein	GO:0006184//GTP catabolic process	GO:0016829//lyase activity;GO:0003924//GTPase activity;GO:0005525//GTP binding	GO:0005622//intracellular
107	EJK52971.1	hypothetical protein THAOC_27681 [Thalassiosira oceanica]	86152.4	0.155	4	7	-	0.76	0.058	4	0.005659	EJK52971.1	MVSRGLSGAASVLALALGATAFVPTKIANSGVRQSVQTPVQKIEGCDAVLARMEGKSVMILPAVAQAQDIDLEAASSSPNRKVDIPMYRNIGIMAHIDAGKTTTTERILYYTGKSYKIGEVHEGGATMDWMEQEQERGITITSAATTCEWRDHRINIIDTPGHVDFTLEVERSLRVLDGAVAVFDGVAGVEPQTETVWRQADKYQVPRMCFLNKMDRTGANFYFCVDTIVEMLGATPAVLQLPIGSEGDFLGVIDLVTNEAIMWKGEDLGASFDRVPLDECNDEPLVDDELKAKAAEWREKLVELAVEQDEDALMEYLEGNEPDVDTLKSLIRKGTLSLSFVPVLTGTAFKNKGVQPLLDAVVDYLPSPVEVAAIKGVKEDSEEEINRISSDAEPFSAL…	100	0	gi|397584410|gb|EJK52971.1|	hypothetical protein THAOC_27681 [Thalassiosira oceanica]	67.52	0	sp|Q2W2I8|EFG_MAGSA	Elongation factor G OS=Magnetospirillum magneticum (strain AMB-1 / ATCC 700264) GN=fusA PE=3 SV=1	100	0	tr|K0RVU0|K0RVU0_THAOC	Elongation factor G, mitochondrial OS=Thalassiosira oceanica GN=THAOC_27681 PE=3 SV=1	gi|83312232|ref|YP_422496.1|	986	0	COG0480	Translation elongation factor EF-G, a GTPase	J	Translation, ribosomal structure and biogenesis	K02355|1|0.0|962|ccp:CHC_T00009455001| elongation factor G	GO:0006414//translational elongation;GO:0006184//GTP catabolic process;GO:0009791//post-embryonic development	GO:0003746//translation elongation factor activity;GO:0003924//GTPase activity;GO:0005525//GTP binding	GO:0044434//chloroplast part
108	XP_002290729.1	predicted protein [Thalassiosira pseudonana CCMP1335]	90179.9	0.07	4	8	EED92481.1	0.64	0.109	4	0.01294	XP_002290729.1	MAAVPDDVASLWKSLDPAVRAALIESESKSDDKTKEGLQGRRAKASTGPRMDDTSANLIGGDSFTKRSVNPGWIKVRADVYDAVKERRDKELAEKVPVDIEVTLPDGKVLSEDKEGVKYQAWRTTPFDVAATIARGLADNTSVARVTYTAYVSDYNPEEDGMGGVDTLAESMAELEINDADEDKSKLTMLWDMTRPLVGSVSKMEFLKFEDDVDARTVFWHSSAHVMGEALERLYGSRLTIGPPLAGGFYYDSYMGDSSSDGALKEEDYKPVEAEVQKIVKSKQKFERLVVTKEEALDMFAGNPFKEQIISTKIADGSRTTVYRCGDLVDLCRGPHVPNTGRIKAFAATRHSATNWLGDTDNDSLQRMYGISFPDKKMLKVWQENQEKAKERDHRRIAQ…	100	0	gi|224002114|ref|XP_002290729.1|	predicted protein [Thalassiosira pseudonana CCMP1335]	52.84	0	sp|Q9D0R2|SYTC_MOUSE	Threonine--tRNA ligase, cytoplasmic OS=Mus musculus GN=Tars PE=1 SV=2	100	0	tr|B8C316|B8C316_THAPS	Uncharacterized protein OS=Thalassiosira pseudonana GN=THAPSDRAFT_22770 PE=3 SV=1	gi|374339435|ref|YP_005096171.1|	521	7e-175	COG0441	Threonyl-tRNA synthetase	J	Translation, ribosomal structure and biogenesis	K01868|1|0.0|730|sind:105160513| threonyl-tRNA synthetase [EC:6.1.1.3]	GO:0006435//threonyl-tRNA aminoacylation	GO:0004829//threonine-tRNA ligase activity;GO:0005524//ATP binding	GO:0005737//cytoplasm
109	XP_002289207.1	ABC cassette-containing protein, partial [Thalassiosira pseudonana CCMP1335]	104729	0.119	5	14	EED92744.1	0.52	0.043	4	0.0005655	XP_002289207.1	QASAKSKNVQNAATDAALAICKNINPFAIKSLLPAIFSQLPVEKKWQTRELAIKCIGVWGEIAPKQLGNALPEIVPEVTACMWDTKKQIKTASTDTMREALKVIGNKDIEHMTEKILTAITKPKEVPEIMHVMAGVTFVQSVESPALAMVVPLLLRGLREKNTATKRQSAVIINNMSKLVDNPLDAAPFLPLLLPALETNASSIADPEARGVTEKAVEQMNRLKDLADKAISVRGDTSKLEAEFKKAFGADGATGGLDMCIQHASSVSTTMMDCNYMEDSQWKKNLLTTFTSHYDAAKAEEGIEKVRVVAEGMMEVPEEEDLEDDAEELCNCQFTLAYGTKILLHNTKMRLLRGKKYGLLGGNDSGKTTLMRSIANNQVEGFPDSSEVRTVFVEADIQG…	100	0	gi|223999069|ref|XP_002289207.1|	ABC cassette-containing protein [Thalassiosira pseudonana CCMP1335]	42.79	0	sp|P25997|EF3_CANAL	Elongation factor 3 OS=Candida albicans (strain SC5314 / ATCC MYA-2876) GN=CEF3 PE=1 SV=3	100	0	tr|B8C1A4|B8C1A4_THAPS	ABC cassette-containing protein (Fragment) OS=Thalassiosira pseudonana GN=THAPSDRAFT_262083 PE=4 SV=1	gi|339481983|ref|YP_004693769.1|	157	2e-38	COG0488	ATPase components of ABC transporters with duplicated ATPase domains	R	General function prediction only	K03235|1|0.0|835|mpp:MICPUCDRAFT_28864| elongation factor 3	GO:0006200//ATP catabolic process	GO:0005524//ATP binding;GO:0016887//ATPase activity	-
110	YP_004072644.1	50S ribosomal protein L13 (chloroplast) [Thalassiosira oceanica CCMP1005]	15949.6	0.101	1	1	ADB27597.1	0.38	0.164	4	0.01862	YP_004072644.1	MNKTFIPSTNYNKRKWYVIDCKDKQLGRLASSIVPLLTGKTKSIYHPSLDVGDYVILINSEELKIDRDVERFHVYEPGRPGSSLKRLVNILPKRIIENCVFNMLPNGFPKKHLVKRLKVYQGAVHPHAAQDPKVLEII	100	1e-98	gi|315320587|ref|YP_004072644.1|	50S ribosomal protein L13 [Thalassiosira oceanica CCMP1005]	51.47	8e-48	sp|P49551|RK13_ODOSI	50S ribosomal protein L13, chloroplastic OS=Odontella sinensis GN=rpl13 PE=3 SV=1	100	3e-97	tr|E7BWP0|E7BWP0_THAOC	50S ribosomal protein L13, chloroplastic OS=Thalassiosira oceanica GN=rpl13 PE=3 SV=1	gi|428305844|ref|YP_007142669.1|	130	4e-38	COG0102	Ribosomal protein L13	J	Translation, ribosomal structure and biogenesis	K02871|1|8e-30|109|ppp:PHYPADRAFT_47260| large subunit ribosomal protein L13	GO:0006412//translation	GO:0003735//structural constituent of ribosome	GO:0005840//ribosome;GO:0009507//chloroplast
111	EJK56174.1	hypothetical protein THAOC_23991 [Thalassiosira oceanica]	17127.8	0.253	1	9	-	0.33	0.149	4	0.01339	EJK56174.1	MAEETRGICVRDVPAKAFIAAYAEHLKNSDKFELPVWADLVKTSVAKELAPYGDDWYYIRAASIARRVYLRPGLGVGQLRKWYGGTDKKGVKTEHFRKANAGIIRSVLIQLEEMKVTEKCEKGGRRMTRVGQQDLDRIAGSVFYDEEEED	100	6e-108	gi|397594205|gb|EJK56174.1|	hypothetical protein THAOC_23991 [Thalassiosira oceanica]	56.62	1e-50	sp|Q9SGA6|RS191_ARATH	40S ribosomal protein S19-1 OS=Arabidopsis thaliana GN=RPS19A PE=2 SV=1	100	1e-106	tr|K0RUT6|K0RUT6_THAOC	Uncharacterized protein OS=Thalassiosira oceanica GN=THAOC_23991 PE=4 SV=1	gi|330508430|ref|YP_004384858.1|	114	1e-31	COG2238	Ribosomal protein S19E (S16A)	J	Translation, ribosomal structure and biogenesis	K02966|1|1e-50|161|crb:CARUB_v10002213mg| small subunit ribosomal protein S19e	GO:0001510//RNA methylation;GO:0006412//translation	GO:0003735//structural constituent of ribosome	GO:0005618//cell wall;GO:0005730//nucleolus;GO:0009506//plasmodesma;GO:0022627//cytosolic small ribosomal subunit;GO:0016020//membrane
112	XP_002290318.1	predicted protein [Thalassiosira pseudonana CCMP1335]	139222	0.012	1	1	EED92070.1	0.81	0.108	4	0.04578	XP_002290318.1	MLIMILRMMLLICSPGGSALRHKMDLANFLIQRHEREQQEQGKLEAQAQGAWRGGNEENFVKMVKELSEGKMADEIQKTNNEPDVNKGESKNDENGVPPLDMPKEANKELVVNEGEPKKGGPPKEWEYLQNIMSWQALQHVLLDNNLLPKPIAQTKTARGHSGLPSNETPSLEGARRGTIACATTHPEVQEVMSSMLAFWNDPRGERNDNPQHTNTKLYNATHPHPFLPAPLPPFDDTTPKSSRIRHKRYLTFEPDTGGWNNLRMSFENIIVLAAMSGRTLVLPPDQIIYLLEPRKGDTRRGRNYNDIFNLTDNNELLRRVPIITAEEFLAIEGGNDGLIPIDKYNSTYQKHLLDITKECEERKKSDVFCEDLYDHYRDHGLLADISAEPPHEQCFIFD…	100	0	gi|224001292|ref|XP_002290318.1|	predicted protein [Thalassiosira pseudonana CCMP1335]	-	-	-	-	100	0	tr|B8C370|B8C370_THAPS	Uncharacterized protein OS=Thalassiosira pseudonana GN=THAPSDRAFT_22799 PE=4 SV=1	-	-	-	-	-	-	-	-	-	-	-
113	XP_002291341.1	dead-box RNA helicase, partial [Thalassiosira pseudonana CCMP1335]	59472.5	0.015	1	1	EED91448.1;EJK44705.1	0.49	0.203	4	0.03415	XP_002291341.1	GIDARLLKALSRLNYVHPTLVQSKSIPLALTSGRDLLVRARTGSGKTLAYCIPVIQKILGRKKEEQGEGTAVKGVILVPTRELCTQVAKVIDDLTYYCADHVKVVVLNNNSNNLQQEALLRDRPDIVVATPAGLVGHVRSGKLNLKRSVETLVVDEADLILSFGYANDVTEIMKSLPKTCQGFLMSATLSPELHNLKHVVLHSPAVLKLEEEDEDGGNGNLMQFYLDLPGKDKFLVLYVFLKLGLLKGKGLFFVNTIDGGYRLKLFLEQFHIRSAVLNAELPLRSRLNIIEHFNVGNFDYLIATDEATDMRSHHDGKKKSTKGKSNKRRRRDGEYGVSRGLDFRGVSFVVNVDLPTSPESYTHRIGRTARGGANGVALTLVDGSKDEEAEMLFQIQENQ…	100	0	gi|224003339|ref|XP_002291341.1|	dead-box RNA helicase [Thalassiosira pseudonana CCMP1335]	42.88	6e-117	sp|Q6CUI6|DBP9_KLULA	ATP-dependent RNA helicase DBP9 OS=Kluyveromyces lactis (strain ATCC 8585 / CBS 2359 / DSM 70799 / NBRC 1267 / NRRL Y-1140 / WM37) GN=DBP9 PE=3 SV=1	100	0	tr|B8C552|B8C552_THAPS	Dead-box RNA helicase (Fragment) OS=Thalassiosira pseudonana GN=THAPSDRAFT_262722 PE=4 SV=1	gi|347541119|ref|YP_004848545.1|	190	8e-53	COG0513	Superfamily II DNA and RNA helicase	L	Replication, recombination and repair	K14810|1|3e-104|327|ppp:PHYPADRAFT_75595| ATP-dependent RNA helicase DDX56/DBP9 [EC:3.6.4.13]		GO:0003676//nucleic acid binding;GO:0005524//ATP binding;GO:0008026//ATP-dependent helicase activity	-
114	EED91832.1	predicted protein, partial [Thalassiosira pseudonana CCMP1335]	55692.2	0.03	1	3	XP_002290080.1;EJK49876.1	0.74	0.104	4	0.02184	EED91832.1	MSSDEEDADDDEFDTKNNSDEDEESDDEMEVERQSKLIDAEMLAEQEEAEVEMRRTIAQQTSVYHLPTAEEIAEDENRVVPPSELRARIEDVLEVLADFKTRREPGRSRSDYIERLAQDMAELFGYLQELVDYFLSMFGPNECLEFLEASDKPRPLVVRVNTLKARRKDLAAALMKRGVRLDPLAPWSKVGLKIYESTVPIGATPEYLAGHYMLQSAASMCPVMALGPQPGDRVLDMSAAPGGKTSYVSQLMKNKGVVIANDLKPERQKATVANLHRLGVRNVVTCVYDGRKIGNQLRNSFDRILLDAPCSGLGVISRDPSVKVQRTIPDVQRCAHLQKELLLAAIDALNAKSKKGGGCMVYSTCSVAVAENEEVVNYLLSKRDVKLVETGLDFGKPGF…	100	0	gi|224000816|ref|XP_002290080.1|	predicted protein [Thalassiosira pseudonana CCMP1335]	57.42	4e-140	sp|O94268|NOP2_SCHPO	25S rRNA (cytosine-C(5))-methyltransferase nop2 OS=Schizosaccharomyces pombe (strain 972 / ATCC 24843) GN=nop2 PE=1 SV=1	100	0	tr|B8C1V6|B8C1V6_THAPS	Uncharacterized protein (Fragment) OS=Thalassiosira pseudonana GN=THAPSDRAFT_34006 PE=3 SV=1	gi|18977629|ref|NP_578986.1|	232	5e-71	COG0144	16S rRNA C967 or C1407 C5-methylase, RsmB/RsmF family	J	Translation, ribosomal structure and biogenesis	K14835|1|8e-148|440|adu:107464593| ribosomal RNA methyltransferase Nop2 [EC:2.1.1.-]	GO:0006364//rRNA processing;GO:0032259//methylation	GO:0008757//S-adenosylmethionine-dependent methyltransferase activity;GO:0003723//RNA binding	-
115	EED89814.1	predicted protein [Thalassiosira pseudonana CCMP1335]	82502.1	0.012	1	2	XP_002292618.1	0.59	0.095	4	0.006843	EED89814.1	MTTPIQAGSEKERRLVGGCLSVVLMYAVCHIRLQQVISRREVHNPQPFDNDGPTLHHNTHRPLHRPLPPPQPTPTMPDEAAPLHAAVSGPLASGSCPALTLARSLAYSLESLPAIHPFDLFVAQLSSDSTEARVDAMKKMATVGEAIGTEDTLGRLIPYLTEHIAMNEKDDDDEILLILAGQLGLLVDGLVPGSQALPLLPILERLCSIEETVVRDKAVETMSKVVPLLMPGGNYDDGQPFSLLLGTAKRLAGADWFTAKVSAAGVLPPIYAFYNAHHPKGESADEARRELRILFKDLSEDDTPMVRRSAAKHLGRMVEAVAGLTQTAEDIVKSGSQPVIAEDNKRLVTFEMVPIFQALSSDEQDSVRLLAVSCAGSVGCGLAMEPGATAEVVLPVVRG…	100	0	gi|224007317|ref|XP_002292618.1|	predicted protein [Thalassiosira pseudonana CCMP1335]	32.55	7e-77	sp|Q7TNP2|2AAB_MOUSE	Serine/threonine-protein phosphatase 2A 65 kDa regulatory subunit A beta isoform OS=Mus musculus GN=Ppp2r1b PE=1 SV=2	100	0	tr|B8C992|B8C992_THAPS	Uncharacterized protein OS=Thalassiosira pseudonana GN=THAPSDRAFT_24146 PE=4 SV=1	-	-	-	-	-	-	-	K03456|1|2e-80|271|cit:102622294| serine/threonine-protein phosphatase 2A regulatory subunit A	-	-	-
116	EED89383.1	DnaJ protein [Thalassiosira pseudonana CCMP1335]	44376.3	0.14	3	5	XP_002293647.1	0.62	0.067	4	0.003041	EED89383.1	MHGGGGSRRGGASARGGGGNVDTTKLYETLGIEKTADDKEIKKAYRKLAVKHHPDKGGDEHKFKEISAAYEVLSDKEKRAKYDKFGLEGISEDGGGGGGHEDLFSMFFGGGRGGGGRSSGPRKGEAVNHPLKVSLEDLYNGKTAKIAINRQVIVGESKMCTACDGQGVVVELRQIALGMVQQLQRRCTECGGQGYCAERRKERKILEVLVEKGMKHNAKIVFRGMGDEKPNIEAGDVNFVIQEKEHEVFKRKGADLLITKTLSLNEALCGFEWIVKHLDGREIAIKSKPGEVIKPEASSSHPFVKIVPNEGMPSHGNPFVKGNLYVLFRVEFPSDGELSAKAVAALKKVLPRPAMDISYDEETVEVCHLEGADVKNFGKGGAANHDNNYDSDEEGEGPG…	100	0	gi|224009377|ref|XP_002293647.1|	DnaJ protein [Thalassiosira pseudonana CCMP1335]	45.24	5e-93	sp|P42825|DNAJ2_ARATH	Chaperone protein dnaJ 2 OS=Arabidopsis thaliana GN=ATJ2 PE=1 SV=2	100	0	tr|B8CBU9|B8CBU9_THAPS	DnaJ protein OS=Thalassiosira pseudonana GN=THAPSDRAFT_37083 PE=4 SV=1	gi|49473744|ref|YP_031786.1|	153	5e-41	COG0484	DnaJ-class molecular chaperone with C-terminal Zn finger domain	O	Posttranslational modification, protein turnover, chaperones	K09503|1|4e-103|315|ota:Ot08g03410| DnaJ homolog subfamily A member 2	GO:0006457//protein folding	GO:0046872//metal ion binding;GO:0031072//heat shock protein binding;GO:0051082//unfolded protein binding	-
117	XP_002296141.1	RL3, ribosomal protein 3, 60S large ribosomal subunit [Thalassiosira pseudonana CCMP1335]	44739.7	0.025	1	2	ACI64858.1	0.33	0.231	4	0.03601	XP_002296141.1	MSHRKFEAPRHGNLGFLPKKRTKHHSGRIRSFPKDNDASAPPHLTAFRAYKAGMTHVVRGVDRPGAVMHKREVVDAVSILETPPMVVVGVVGYLETPRGLRTLTTVFAEHLSEEFKRRAYKNWYKSKRKAYTKYAKKYTENDGKDIEKELERIAKHCKVVRVITHSQVKKLHLRIRKAHIMEVQINGGADAKAKVDFAKSLFEKEVTVDSVFAKDELIDVLGVTKGHGYEGVTTRWGVSRLPRKTHRGLRKVACIGSWHPARVSDTVPRAGQNGYHHRTEMNKKIYRIGKKGDNSSCQTDADLTEKSITPMGGFVHYGQIREDWVMIKGACVGVKKRPLILRKSLMKHSSRKHLESIDLRFIDTSSKLGHGRFQTAEEKAKFLGPLASSGANKSA	100	0	gi|224004980|ref|XP_002296141.1|	RL3, ribosomal protein 3, 60S large ribosomal subunit [Thalassiosira pseudonana CCMP1335]	63.94	4e-177	sp|P35684|RL3_ORYSJ	60S ribosomal protein L3 OS=Oryza sativa subsp. japonica GN=RPL3 PE=2 SV=2	100	0	tr|B5YMS4|B5YMS4_THAPS	RL3, ribosomal protein 3, 60S large ribosomal subunit OS=Thalassiosira pseudonana GN=RL3 PE=3 SV=1	gi|14520558|ref|NP_126033.1|	219	3e-66	COG0087	Ribosomal protein L3	J	Translation, ribosomal structure and biogenesis	K02925|1|0.0|518|egr:104420002| large subunit ribosomal protein L3e	GO:0006412//translation	GO:0003735//structural constituent of ribosome	GO:0005840//ribosome
118	EED95284.1	hypothetical protein THAPSDRAFT_27083 [Thalassiosira pseudonana CCMP1335]	52984.4	0.019	1	1	XP_002287841.1	0.57	0.054	4	0.00128	EED95284.1	MTSPAPADAAADDAANYDLTSLISPYLDLHMMFPLLEYIDSLISTGSVSYSSSDVAQARLKLLKPTHMVDYAMDIYREVHGENAEIPKDMEDQKVEVFRELEELREGQMKLDELFRNEEVRANLVQNNQWNVKSLIAATSYGITSDTIAAYYKFAKFNFDCGDYQQGPAAKSSPAEDEKTGNPNMYYLTSIDTTLLQVLWGKLSCEILVEDWEEASVALVAVKTAIDLFVFWNDASGKGLESMVELFTSEKYLQAVTTHAPHLLRYLTAAVLLCKRRAAKKAGSNSNAEGRRLLRDLVKVMQQCEYSDPIVEFVDKLSVKFDFEAAQSQLARCETVLSSDFFLCKQTELFMEEARVFVFENYCRIHHKIDLTTLGEKLAMDRDRAERWIVDLIRNALLD…	100	0	gi|223996335|ref|XP_002287841.1|	hypothetical protein THAPSDRAFT_27083 [Thalassiosira pseudonana CCMP1335]	37.53	3e-87	sp|Q1LUA8|EI3EB_DANRE	Eukaryotic translation initiation factor 3 subunit E-B OS=Danio rerio GN=eif3eb PE=3 SV=2	100	0	tr|B8BUG4|B8BUG4_THAPS	Eukaryotic translation initiation factor 3 subunit E OS=Thalassiosira pseudonana GN=THAPSDRAFT_27083 PE=3 SV=1	-	-	-	-	-	-	-	K03250|1|4e-96|300|ppp:PHYPADRAFT_106353| translation initiation factor 3 subunit E	GO:0006413//translational initiation	GO:0003743//translation initiation factor activity	GO:0005737//cytoplasm
119	EED91521.1	26S proteasome ATPase regulatory subunit [Thalassiosira pseudonana CCMP1335]	47504.4	0.222	1	2	XP_002291414.1	0.56	0.158	4	0.02296	EED91521.1	MIDDETASMSISELRQRIHLIDNDIRVMKSDIQRIQHESRGQRERIRENIEKVKLNKQLPYLVGNVVEVLEPEAEDGLEDEENQGAEEDGGAMDVNANRKTRSAVIRTSTRQTIYLPVPGLVDTDELRPSDLIGTNKDSYLILEKLPAEFDSRVKAMEVDERPTEEYSDIGGADKQIQELIEAVVLPMTHKDMFDAIGIKPPKGVLLHGPPGTGKTLLARACANQTNAVFLKLAGPQLVQMFIGDGAKLIRDAFELAKEKIADGTSNGAIIFIDELDAIGTKRFGGDQSGDREVQRTMLELLSQLDGFGSNDMIKVIAATNRPDVLDPALLRSGRLDRKIELPHPSEEARSKIMRIHSRKMNVSPEVVFEELARSCEDFNGAQLKAVCVEAGMLALRNE…	100	0	gi|224003485|ref|XP_002291414.1|	26S proteasome ATPase regulatory subunit [Thalassiosira pseudonana CCMP1335]	67.76	0	sp|Q9SEI2|PS6AA_ARATH	26S proteasome regulatory subunit 6A homolog A OS=Arabidopsis thaliana GN=RPT5A PE=1 SV=1	100	0	tr|B8C5K0|B8C5K0_THAPS	26S proteasome ATPase regulatory subunit OS=Thalassiosira pseudonana GN=RPT5 PE=3 SV=1	gi|336121896|ref|YP_004576671.1|	330	1e-108	COG1222	ATP-dependent 26S proteasome regulatory subunit	O	Posttranslational modification, protein turnover, chaperones	K03065|1|0.0|597|nnu:104610843| 26S proteasome regulatory subunit T5	GO:0010498//proteasomal protein catabolic process;GO:0009553//embryo sac development;GO:0010255//glucose mediated signaling pathway;GO:0009555//pollen development	GO:0008233//peptidase activity;GO:0017111//nucleoside-triphosphatase activity;GO:0005524//ATP binding	GO:0008540//proteasome regulatory particle, base subcomplex;GO:0005737//cytoplasm;GO:0005886//plasma membrane
120	XP_002287533.1	predicted protein [Thalassiosira pseudonana CCMP1335]	28049.1	0.087	2	6	EED94976.1;EJK65858.1	0.77	0.05	4	0.003848	XP_002287533.1	MNLFDRFTRVAKSNINNVLKSLEDPEKIMNQALEDMQTDLVKVRQSYAEITATQRRLMKQKEQAEALAEDWYKRAQLALSKGEEGLAKEALTRRQQQVETMEGLKLQIDMQATAVDKLYEGMQALEAKILESKSKKEQMVARARTAQSTQKVNDMLGGITGMTSMDAFNRMEEKVEALEAAAEVSAEMGALSGNALPGSKASSLESQFKMLEAGSSVDKELEEMKKMLGSTSSASKSSGGTDEELERLKREAGL	100	7e-156	gi|223995719|ref|XP_002287533.1|	predicted protein [Thalassiosira pseudonana CCMP1335]	44.3	3e-50	sp|O80796|VIPP1_ARATH	Membrane-associated protein VIPP1, chloroplastic OS=Arabidopsis thaliana GN=VIPP1 PE=1 SV=1	100	2e-154	tr|B8BVQ1|B8BVQ1_THAPS	Uncharacterized protein OS=Thalassiosira pseudonana GN=THAPSDRAFT_32459 PE=4 SV=1	gi|428313669|ref|YP_007124646.1|	209	7e-66	COG1842	Phage shock protein A	KT	Transcription;Signal transduction mechanisms	K03969|1|3e-61|195|gsl:Gasu_40990|	-	-	-
121	EED88775.1	dna-directed RNA polymerase I 40kDa polypeptide, rpo1-1-like protein, partial [Thalassiosira pseudonana CCMP1335]	39020	0.031	1	1	XP_002293766.1	0.8	0.056	4	0.007442	EED88775.1	MAPIPDPSVGSYEVSSSGLHFLHAPSPPLPADGTEFLSRIRQNFSLRVLERPSKNELVFEVVGVDVSFANALRRIMIAEIPTMALEHVYMWNNSSLIHDEVLSHRLGLVPLNVDPRLFDEYGVDVDEVGEVAATDRNTIVFRLNEATSLHSSSNQQKTVIDSPHRPFTKHIYTRDLLWAPQGSQLTNFPLHSTGVGSGVGGGIRPISEDILLAKLRPGQVIELEAHARKGVGKDHAKFSPVATASYRLMPHIEIVKPIYDELAEELVNWFEPGVFKLVPADDEDGGHKVKAELSNPYACTMSRNYMRNPTLKESIKMSRVPNHFIFSVESVGMMEPAVIVSEALKVLKEKC	100	0	gi|224009616|ref|XP_002293766.1|	dna-directed RNA polymerase I 40kDa polypeptide, rpo1-1-like protein [Thalassiosira pseudonana CCMP1335]	46.03	1e-82	sp|Q32L22|RPAC1_BOVIN	DNA-directed RNA polymerases I and III subunit RPAC1 OS=Bos taurus GN=POLR1C PE=2 SV=1	100	0	tr|B8CCH8|B8CCH8_THAPS	Dna-directed RNA polymerase I 40kDa polypeptide, rpo1-1-like protein (Fragment) OS=Thalassiosira pseudonana GN=THAPSDRAFT_42412 PE=4 SV=1	gi|15678067|ref|NP_275181.1|	119	7e-30	COG1146	NAD-dependent dihydropyrimidine dehydrogenase, PreA subunit	F	Nucleotide transport and metabolism	K03027|1|2e-74|238|jcu:105633111| DNA-directed RNA polymerases I and III subunit RPAC1	GO:0006351//transcription, DNA-templated	GO:0003899//DNA-directed RNA polymerase activity;GO:0003677//DNA binding;GO:0046983//protein dimerization activity	-
122	XP_002288132.1	predicted protein [Thalassiosira pseudonana CCMP1335]	233546	0.008	1	1	EED95575.1	0.55	0.144	4	0.01784	XP_002288132.1	MSARSRYLAAISPRAGDECDSTPTSTRSSSLGPLSSSSNFHNSTAAPSNFNSSSSRTATSSTLKSPSNIMGRQRGSVGNVVIGQSGHQQSISQQKTSSNSSNNMKAPPPPPPGPPPKKVKKRGSVAGTVNLNASSNTGDVNVSAGSGNEATAMSHQQQQLGVGQHTADQQHPDTNKGETWSPREEIQAGNVAKFKQLLWGGDTDNNNNNAAISTPTHHHQGSKQLQQRVLPPITPPRPHTHFATSPVTNSSSNKGGGRRSTRSPSPPKYKLNAPPPLGIGTNNNDHANVSGGSNQHHQQRTPPRSATNLAPPSRVLHARGTPDRSNPSPLRQRLGNLTPIDTSFGGGKSGRGGGADSNSSNGNNTGGDKVTPTASSTRSRQLGSPFHNDTSNNNAEAAI…	100	0	gi|223996917|ref|XP_002288132.1|	predicted protein [Thalassiosira pseudonana CCMP1335]	24.36	1e-10	sp|P62291|ASPM_MACFA	Abnormal spindle-like microcephaly-associated protein homolog OS=Macaca fascicularis GN=ASPM PE=2 SV=1	100	0	tr|B8BW52|B8BW52_THAPS	Uncharacterized protein OS=Thalassiosira pseudonana GN=THAPSDRAFT_21582 PE=4 SV=1	-	-	-	-	-	-	-	K16743|1|7e-13|79.0|cre:CHLREDRAFT_174686| abnormal spindle-like microcephaly-associated protein	-	-	-
123	XP_002287868.1	predicted protein [Thalassiosira pseudonana CCMP1335]	13381.3	0.069	1	1	EED95311.1	0.28	0.179	4	0.02207	XP_002287868.1	MARERKAKPDLVSRDYTIHLAKHTHKTTFKAKTPRGIKKIKEFAQKAMGTKDVRIDTDVNKFVWAQGVRNPPKRIRVRLSRKRNEDEDAEEKLYTLVQLVKVSTFKGLSTENVDSA	100	4e-69	gi|223996389|ref|XP_002287868.1|	predicted protein [Thalassiosira pseudonana CCMP1335]	60.38	2e-38	sp|Q9XGL4|RL31_CYAPA	60S ribosomal protein L31 OS=Cyanophora paradoxa GN=RPL31 PE=3 SV=1	100	9e-68	tr|B8BUM0|B8BUM0_THAPS	Uncharacterized protein OS=Thalassiosira pseudonana GN=THAPSDRAFT_27101 PE=4 SV=1	gi|407462934|ref|YP_006774251.1|	60.5	2e-11	COG2097	Ribosomal protein L31E	J	Translation, ribosomal structure and biogenesis	K02910|1|2e-37|125|ccp:CHC_T00009180001| large subunit ribosomal protein L31e	GO:0006412//translation	GO:0003735//structural constituent of ribosome	GO:0005840//ribosome
124	AIR75422.1	RNA polymerase beta' subunit (chloroplast) [Cyclotella sp. L04_2]	169203	0.062	7	7	AIR75563.1	0.72	0.073	4	0.007467	AIR75422.1	MKDYIYQNTLINKKQLKELLGWSFSKYDSMQASLLADELKYLGFKYATQAGISISIEDLKVPQTKNEMLEKANKDIENAEKICLKGKITNVERFQKIIDTWSIASESLKDNVVSYFKAYDPLNSVYIMAFSGARGNLSQVRQLVGMRGLMADPSGEIMRVPIKKNFREGLTITDYLMSGYGARKGIVDTALKTANSGYLTRRLIDIAQDIIIREKDCLTYSSFRIDTSNKLDNEQLIGRILLKSVYDPKTEKLITSPNTAITSELLTLFKQKSVSKFYIRSPLTCNLYHSICQMCYGWDLSNQNLVDLGEAIGILAGQSIGEPGTQLTMRTFHTGGIFTSEARQQIISPKDGIIKFSKILKTVILRTNRGEDVLVTKNSGSLILIPEQFDQSIIQIELL…	100	0	gi|691189908|gb|AIR75422.1|	RNA polymerase beta' subunit (chloroplast) [Cyclotella sp. L04_2]	82.15	0	sp|A0T0Q9|RPOC2_THAPS	DNA-directed RNA polymerase subunit beta'' OS=Thalassiosira pseudonana GN=rpoC2 PE=3 SV=1	100	0	tr|A0A089VIG5|A0A089VIG5_9STRA	DNA-directed RNA polymerase subunit beta'' OS=Cyclotella sp. L04_2 GN=rpoC2 PE=3 SV=1	gi|440682149|ref|YP_007156944.1|	562	4e-174	COG0086	DNA-directed RNA polymerase, beta' subunit/160 kD subunit	K	Transcription	K03046|1|9e-149|489|ccp:CHC_805| DNA-directed RNA polymerase subunit beta' [EC:2.7.7.6]	GO:0006351//transcription, DNA-templated	GO:0003899//DNA-directed RNA polymerase activity;GO:0003677//DNA binding	GO:0009507//chloroplast
125	EJK65412.1	hypothetical protein THAOC_13729 [Thalassiosira oceanica]	51522.1	0.053	1	1	-	0.74	0.126	4	0.0371	EJK65412.1	MPKHKHSRHRDDRRGGGSDAPYHREDAKSRGGKRSRHGGDDEEDEFGRSKSRRDRKKNKVGKNGSKRDGPAPDDTEPCPTFDSMSLYEAGPSCGGVYAYGFERPSAIQQRAIRPIVRGRDVIAQSQSGTGKTAVFSISALQLLDDRVKDPQVMVLSPTRELAEQTQRVVASLGDFMSAKCHACIGGRSLGDDRKALQAGCQVVSGTPGRVYDLIKRGDLTTRDLKAFIIDEADEMLNKGFKEQIYDIYRYLPPSTQVVLVSATLPVEVLEMTDKFMQDPVRILVKRDELTLEGIRQFYVAVEKEDWKLDTLIDLYDSLTVTQAVIFCNTKQKVDWLTGKMRESNFTVSAIHGDMAQEDREKVMEEFRSGSSRVLIATDLWGRGIDVQQVSLVVCYDLPP…	100	0	gi|397619807|gb|EJK65412.1|	hypothetical protein THAOC_13729 [Thalassiosira oceanica]	70.68	0	sp|Q9VHS8|IF4A3_DROME	Eukaryotic initiation factor 4A-III OS=Drosophila melanogaster GN=eIF4AIII PE=1 SV=1	100	0	tr|K0T4T0|K0T4T0_THAOC	Uncharacterized protein OS=Thalassiosira oceanica GN=THAOC_13729 PE=3 SV=1	gi|296132950|ref|YP_003640197.1|	292	7e-92	COG0513	Superfamily II DNA and RNA helicase	L	Replication, recombination and repair	K13025|1|0.0|551|olu:OSTLU_26958| ATP-dependent RNA helicase [EC:3.6.4.13]	GO:0001666//response to hypoxia;GO:0006413//translational initiation;GO:0006397//mRNA processing	GO:0003743//translation initiation factor activity;GO:0008026//ATP-dependent helicase activity;GO:0005524//ATP binding	GO:0035145//exon-exon junction complex;GO:0005730//nucleolus;GO:0016607//nuclear speck;GO:0016020//membrane
126	AFM78112.1	translation elongation factor-like protein, partial [Skeletonema costatum]	33937.8	0.344	3	7	-	0.52	0.14	4	0.0173	AFM78112.1	VTIQCNTKEFFTDKYHYTIVDAPGHKDYIKNMITGSATADVGLLLVPAEKGGFEAAIAKADAKLGVEEGQTRQHARLLYLLGVEQLIVGINKMDSCNWDEGRFNEIKEEFVKMLQMIGFKPKKIPFIPYSGFNGDNLVEKSDKCPWYKGWKANITPKKAVEGFTIVEALNNFIQPPKREPTLPVRLPISNIYNIKGVGQIICGTVEQGTLLPGDVIGICPSGLKDKKIFSIEQHKKVLDKAAPGDSVGLSIKGITKDEKVQPGDIIYVQRDGELKPTKSFTAMVSVQEHPGVLKPGYAPVVFCRT	100	0	gi|392522647|gb|AFM78112.1|	translation elongation factor-like protein, partial [Skeletonema costatum]	43.93	4e-85	sp|Q01765|EF1A_PODCU	Elongation factor 1-alpha OS=Podospora curvicolla GN=TEF PE=3 SV=1	100	0	tr|I6TNQ2|I6TNQ2_SKECO	Translation elongation factor-like protein (Fragment) OS=Skeletonema costatum GN=EFL PE=4 SV=1	gi|347522783|ref|YP_004780353.1|	235	7e-73	COG5256	Translation elongation factor EF-1alpha (GTPase)	J	Translation, ribosomal structure and biogenesis	K03231|1|2e-101|308|apro:F751_6279| elongation factor 1-alpha	GO:0006414//translational elongation;GO:0006184//GTP catabolic process	GO:0003746//translation elongation factor activity;GO:0003924//GTPase activity;GO:0005525//GTP binding	-
127	EJK68786.1	hypothetical protein THAOC_10006 [Thalassiosira oceanica]	47287.8	0.033	1	1	XP_002294765.1;EED88125.1	0.56	0.149	4	0.02023	EJK68786.1	MTSSTTTALILTATLPLQAALAFSSWSLGADGSRGLPPSAHTSQPSRPSPSRLSYKASTVADPHGTVAPLPGDPIPEVDLASLPESHYDPDDHLPNQPWRRGDTAGCHDPISAPWRLKAEDVIDHAVNRVGGKVVDVTWYMAKCVISIDQASLVDVVPYVHGPPVQIEYPEATDFTGHVFEDPESGTEDEMFTEEDELLDYEQYDEDTEYEIMVANMPQEEDEDTGEPLPPREPRDRSVRMRELQEEWESRWEDEPELLKPSIDPNRKSKDPFHEVDTKALAVVARAINEALSEDEVEDKLEILSRHDIILTSPLENPCVLDSQREFDDARDLDVFVETRDPWGSNRVLFGKLVDRNAMDVIINQDNSGRMVTIPNCMIHQVLLPSGLAVVSENFKQKM…	100	0	gi|397628205|gb|EJK68786.1|	hypothetical protein THAOC_10006 [Thalassiosira oceanica]	-	-	-	-	100	0	tr|K0T664|K0T664_THAOC	Uncharacterized protein OS=Thalassiosira oceanica GN=THAOC_10006 PE=4 SV=1	-	-	-	-	-	-	-	-	-	-	-
128	EJK71308.1	hypothetical protein THAOC_07275 [Thalassiosira oceanica]	36314.9	0.25	3	13	-	0.76	0.056	4	0.00473	EJK71308.1	MSINVGINGFGRIGRLVMRAAAKNPAINIVAVNDPFIPVDYMEYMYKYDTVHGRCGQEVSHCKESKTLTIDGNTIKLFGEMDPSKISWGDAGADYVVESTGVFTSTEKASMHMKGGAKKVIISAPSADAPMFVMGVNHEEYQSAMDVVSNASCTTNCLAPLAKVINDEFGIKEGLMTTVHAVTATQQTVDGPSQKDWRGGRAACYNIIPSSTGAAKAVGKVIPELNGKLTGMAFRVPTANVSVVDLTAQLDKGADYETISAKIKDASEGSMKGFLGYQDEDIVSSDFIGDARSSIFDKKAGIALTDNFVKLVSWYDNEAGYSNRVLDLISHMEAQK	100	0	gi|397634156|gb|EJK71308.1|	hypothetical protein THAOC_07275 [Thalassiosira oceanica]	72.12	2e-168	sp|P26988|G3P_PHYIN	Glyceraldehyde-3-phosphate dehydrogenase OS=Phytophthora infestans GN=GPDA PE=3 SV=1	100	0	tr|K0SY05|K0SY05_THAOC	Glyceraldehyde-3-phosphate dehydrogenase OS=Thalassiosira oceanica GN=THAOC_07275 PE=3 SV=1	gi|313203852|ref|YP_004042509.1|	461	2e-162	COG0057	Glyceraldehyde-3-phosphate dehydrogenase/erythrose-4-phosphate dehydrogenase	G	Carbohydrate transport and metabolism	K00134|1|2e-166|470|mdm:103404229| glyceraldehyde 3-phosphate dehydrogenase [EC:1.2.1.12]	GO:0006096//glycolytic process;GO:0055114//oxidation-reduction process	GO:0004807//triose-phosphate isomerase activity;GO:0051287//NAD binding;GO:0050661//NADP binding;GO:0004365//glyceraldehyde-3-phosphate dehydrogenase (NAD+) (phosphorylating) activity	GO:0005737//cytoplasm
129	XP_002293041.1	predicted protein [Thalassiosira pseudonana CCMP1335]	205372	0.004	1	2	EED89502.1	0.54	0.107	4	0.008108	XP_002293041.1	MDAEEELRNLYQALDERDRHIEDLEAELERETQAVQEEKNGLSSDLEQHRDDLIKCHDAISELQIQIKQLTSENDDLSDEKLKLEDQVSAHKSLLDAQRTKLAQHTRLSDSFKKQQKDGNQQLQRLELENQRLRATILEIEENEDILVNEIDTLAKEKSENQERSEELSSKCDSLFADVDEKTRVNAELLQDKRNLQSDFESEQRAHKQSQDEWRRKDTGYRMEISKLEDELKRERIRYEELIQGKEYEANKKELIKLKQENQRIFAAYNQCLVDKNQAERDLDSTIRALHQSKMKEKEQTALAVRKEHATSTELKTKLTKALQHEDSLKTRCTDLEEQLEQVQNQLERSDERNSWYESNHGLTDAVRYQKRLEADIRRRDYDLKQLNHQLGMEIDRRR…	100	0	gi|224008164|ref|XP_002293041.1|	predicted protein [Thalassiosira pseudonana CCMP1335]	-	-	-	-	100	0	tr|B8CAG1|B8CAG1_THAPS	Uncharacterized protein OS=Thalassiosira pseudonana GN=THAPSDRAFT_9127 PE=4 SV=1	-	-	-	-	-	-	-	-	-	-	-
130	EED88710.1	histone H3 [Thalassiosira pseudonana CCMP1335]	15329.5	0.081	1	3	XP_002293701.1;EJK48130.1	0.41	0.19	4	0.02746	EED88710.1	MARTKQTARKSTGGKAPRKQLATKAARKSAPTAGGVKKPHRYRPGTVALREIRKYQKSTDLLIRKAPFQRLVREIAQDFKTDLRFQSTAVLALQEASEAYLVGLFEDTNLCAIHAKRVTIMPKDIQLARRIRGERA	100	2e-94	gi|224009486|ref|XP_002293701.1|	histone H3 [Thalassiosira pseudonana CCMP1335]	96.32	1e-91	sp|Q71H73|H33_VITVI	Histone H3.3 OS=Vitis vinifera PE=2 SV=3	100	4e-93	tr|B8CC53|B8CC53_THAPS	Histone H3 OS=Thalassiosira pseudonana GN=THAPSDRAFT_29950 PE=3 SV=1	-	-	-	-	-	-	-	K11253|1|4e-93|268|olu:OSTLU_32891| histone H3	GO:0006007//glucose catabolic process;GO:0006605//protein targeting;GO:0006334//nucleosome assembly	GO:0003677//DNA binding	GO:0000786//nucleosome;GO:0005634//nucleus
131	XP_002289250.1	NNT NAD transhydrogenase, partial [Thalassiosira pseudonana CCMP1335]	109139	0.037	2	9	EED92787.1	0.78	0.099	4	0.03098	XP_002289250.1	KPIPYSDLTVGVLKETYPGEQRVSIAPESAKMLVDAGLSVIVESGAGEHAAFSDAAYVNVGCIVLPKESVYAQADIITKIRPPDEYEVPKLAKKTFVGMISPSINTDLYNELTEQETNVFALDCVPRMLSRAQTYDVLSSQANIAGYRAVIEAANNFPRFFAGQMTAAGKVPPAKVLVLGVGVAGLAAIQTAKNMGAIVRAFDVRAVTKEQVESMGATFLEVPLKEDGAGAGGYAKEMSDEYKAAQAQLMLEQARDVDVIITTALIPGRKAPVLVNQDMLDVMKPGSVLVDLAAANGGNVAQTEANKVITTENGITIIGYTDLPSRLASTSSTLFGNNVAKFLLSIGPQTTKQQGVFQIDMEDDAVQNMLISYNGEARWPDKITPYNPPPPPTLTSEVI…	100	0	gi|223999155|ref|XP_002289250.1|	NNT NAD transhydrogenase [Thalassiosira pseudonana CCMP1335]	47.47	0	sp|P11024|NNTM_BOVIN	NAD(P) transhydrogenase, mitochondrial OS=Bos taurus GN=NNT PE=1 SV=3	100	0	tr|B8C1J0|B8C1J0_THAPS	NNT NAD transhydrogenase (Fragment) OS=Thalassiosira pseudonana GN=THAPSDRAFT_33859 PE=4 SV=1	gi|428771442|ref|YP_007163232.1|	476	1e-155	COG3288	NAD/NADP transhydrogenase alpha subunit	C	Energy production and conversion	K00323|1|0.0|800|cre:CHLREDRAFT_139758| NAD(P) transhydrogenase [EC:1.6.1.2]	GO:0015992//proton transport;GO:0055114//oxidation-reduction process	GO:0008750//NAD(P)+ transhydrogenase (AB-specific) activity;GO:0050661//NADP binding	GO:0016021//integral component of membrane
132	EJK66770.1	hypothetical protein THAOC_12264 [Thalassiosira oceanica]	62860.1	0.019	1	1	-	0.73	0.054	4	0.003373	EJK66770.1	MASISASTTHKVKKTVSKPVGKGKKNGILKTGTSSKLKGKAGGSGGPPLTRRGSAPRLKPSSELNHPQALDAFLSLDESKQKDRVLQEFLPHALGERATFHEGIAKPHTASTSQSRGQAAADIAVLVKKMGPMVVLKRFGVLAEVEKMLLPDGIGAAFGNGTGRGTNPGGGMRKIASAVSLASMDSSDANIPSTMSIGTSTLGTDSKRGKTTPQNAREGALLLLRALSELGLKSVEPFVVPMLAAALDECGSSSSSLREAASDASVAIITLANPLAMPMLVIPVLFEALQSPEWRVKSTALERLSQVAADAPRQVSKMLPQIIPIVTAQIWDTKPQVTKAANQALLSVCETNDNPDIKPAIPAVVHAISKPADTYKAVEELMATTFVATVDASTLSILC…	100	0	gi|397622737|gb|EJK66770.1|	hypothetical protein THAOC_12264 [Thalassiosira oceanica]	36.86	1e-34	sp|O94489|EF3_SCHPO	Elongation factor 3 OS=Schizosaccharomyces pombe (strain 972 / ATCC 24843) GN=tef3 PE=1 SV=1	100	0	tr|K0SN41|K0SN41_THAOC	Uncharacterized protein OS=Thalassiosira oceanica GN=THAOC_12264 PE=4 SV=1	-	-	-	-	-	-	-	K03235|1|4e-37|151|csl:COCSUDRAFT_47721| elongation factor 3		GO:0097159//organic cyclic compound binding;GO:1901363//heterocyclic compound binding	-
133	EED91649.1	RL23a, ribosomal protein 23a 60S large ribosomal subunit [Thalassiosira pseudonana CCMP1335]	16102	0.07	1	6	XP_002291542.1;EJK65394.1	0.41	0.131	4	0.01076	EED91649.1	MAGGAKAAAVAKKLTKSTKSKKGTRIHTKVHFYRTQTLSLERKPKYARRSVPRKSTVDKYSIIKYPLTTESSMKLIEDSNTLVFIVDIKANKRQIKQAVKDLYQIECEKVNTLITPRGLKKSYVRLSKDFDALDVANRVGVI	100	1e-81	gi|224003741|ref|XP_002291542.1|	RL23a, ribosomal protein 23a 60S large ribosomal subunit [Thalassiosira pseudonana CCMP1335]	65.25	4e-50	sp|P62752|RL23A_RAT	60S ribosomal protein L23a OS=Rattus norvegicus GN=Rpl23a PE=2 SV=1	100	2e-80	tr|B8C438|B8C438_THAPS	RL23a, ribosomal protein 23a 60S large ribosomal subunit OS=Thalassiosira pseudonana GN=RL23a PE=3 SV=1	gi|124028159|ref|YP_001013479.1|	93.2	4e-24	COG0089	Ribosomal protein L23	J	Translation, ribosomal structure and biogenesis	K02893|1|7e-48|154|egr:104431533| large subunit ribosomal protein L23Ae	GO:0006412//translation;GO:0006979//response to oxidative stress;GO:0006355//regulation of transcription, DNA-templated;GO:0009409//response to cold;GO:0009644//response to high light intensity	GO:0003735//structural constituent of ribosome;GO:0003677//DNA binding;GO:0003700//sequence-specific DNA binding transcription factor activity;GO:0000166//nucleotide binding	GO:0005618//cell wall;GO:0005730//nucleolus;GO:0022626//cytosolic ribosome;GO:0016020//membrane
134	AIR75515.1	Clp protease ATP binding subunit (chloroplast) [Cyclotella sp. L04_2]	104826	0.036	1	5	AIR75656.1	0.67	0.079	4	0.006244	AIR75515.1	MFEKFTEGAVKVIMLAQEEARRMGHSFVGTEQIILGMLGQRHGIAGRALSQIKITLKQFRKDIERYIGRGTGFVGSEIPFTPRAKRILEMSIHEAHDLGVNYVGSEHILLAIINDGDGIGFRILMRSRVNFVKLKRIIFSYIDDQQENISSKSTSDKYDKVPRLTPEEARDMFFRRGQWAKEKKSTIENYSENLTQEAEDKRLDPVIGRDSEINALIKVLARRRKNNPVLVGEAGVGKTACAEGLALLMVGNDCPDFLSKHVMYNLDLGSVLAGTKYRGEFEERFKSIIEEVQEHGKTILVIDEIHTIVGAGAAEGAVDAANLLKPALARGALKVIGATTLDEYRKHIEKDPALERRFHPIIVEEPTVETTIDILKGLRPYFQSHHALLYETEALVAAA…	100	0	gi|691190001|gb|AIR75515.1|	Clp protease ATP binding subunit (chloroplast) [Cyclotella sp. L04_2]	60.79	0	sp|P49574|CLPC_ODOSI	ATP-dependent Clp protease ATP-binding subunit ClpA homolog OS=Odontella sinensis GN=clpC PE=3 SV=1	100	0	tr|A0A089VMB4|A0A089VMB4_9STRA	Clp protease ATP binding subunit OS=Cyclotella sp. L04_2 GN=clpC PE=3 SV=1	gi|37521633|ref|NP_925010.1|	895	0	COG0542	ATP-dependent Clp protease ATP-binding subunit ClpA	O	Posttranslational modification, protein turnover, chaperones	K03696|1|0.0|847|cvr:CHLNCDRAFT_32555| ATP-dependent Clp protease ATP-binding subunit ClpC	GO:0006508//proteolysis	GO:0008233//peptidase activity;GO:0005524//ATP binding;GO:0017111//nucleoside-triphosphatase activity	GO:0009507//chloroplast
135	EJK66258.1	hypothetical protein THAOC_12839 [Thalassiosira oceanica]	18388.3	0.093	1	2	-	0.69	0.019	4	0.000117	EJK66258.1	MSLGLVGALLEASLVNLASMHLTHSFQDIDGGEGGRIVLGLFGDVVPKTAENFRALCTGEKGIGKKGKPLHYKGSVFHRVIPNFMLQGGDFTDGNGRGGESIYGEKFADENFQLKHEAPMYLSMANAAWLDGRHVVFGKVLEGEDVVKRIEGYGSNSGSTTKTVTIADSGEL	100	7e-103	gi|397621369|gb|EJK66258.1|	hypothetical protein THAOC_12839 [Thalassiosira oceanica]	65.84	1e-61	sp|Q8LDP4|CP19D_ARATH	Peptidyl-prolyl cis-trans isomerase CYP19-4 OS=Arabidopsis thaliana GN=CYP19-4 PE=1 SV=2	100	2e-101	tr|K0SJ74|K0SJ74_THAOC	Peptidyl-prolyl cis-trans isomerase OS=Thalassiosira oceanica GN=THAOC_12839 PE=3 SV=1	gi|383452680|ref|YP_005366669.1|	205	1e-66	COG0652	Peptidyl-prolyl cis-trans isomerase (rotamase) - cyclophilin family	O	Posttranslational modification, protein turnover, chaperones	K01802|1|1e-62|195|rcu:8286456| peptidylprolyl isomerase [EC:5.2.1.8]	GO:0044267//cellular protein metabolic process	GO:0016853//isomerase activity	-
136	AAV67002.1	nitrate reductase, partial [Thalassiosira weissflogii]	15372.1	0.061	6	8	AAV67001.1	0.66	0.074	4	0.004868	AAV67002.1	GGWWYKPEYIFNELNINSAMTAPDHNETIDLARNIAGTYEVGGYAYTGGGRRISRVEVTTDGGKHWEVSKIHQIERPTDYGMYWCWIWWSFDLKVADLVGCKEIWCRAWDESNNCQPTEPTWNLMGMGNNQ	99.24	4e-95	gi|55845945|gb|AAV66997.1|	nitrate reductase [Asterionellopsis glacialis]	53.08	5e-46	sp|P49102|NIA3_MAIZE	Nitrate reductase [NADH] 3 OS=Zea mays PE=3 SV=1	99.24	9e-94	tr|Q5EZ45|Q5EZ45_9STRA	Nitrate reductase (Fragment) OS=Asterionellopsis glacialis PE=2 SV=1	gi|159899383|ref|YP_001545630.1|	71.6	6e-14	COG2041	Periplasmic DMSO/TMAO reductase YedYZ, molybdopterin-dependent catalytic subunit	C	Energy production and conversion	K10534|1|6e-47|164|olu:OSTLU_37938| nitrate reductase (NAD(P)H) [EC:1.7.1.1 1.7.1.2 1.7.1.3]	GO:0042128//nitrate assimilation;GO:0055114//oxidation-reduction process	GO:0020037//heme binding;GO:0050660//flavin adenine dinucleotide binding;GO:0043546//molybdopterin cofactor binding;GO:0009703//nitrate reductase (NADH) activity;GO:0030151//molybdenum ion binding;GO:0005506//iron ion binding;GO:0009055//electron carrier activity	-
137	XP_002295925.1	phospholipase C, partial [Thalassiosira pseudonana CCMP1335]	49760	0.018	1	1	ACI64642.1	0.82	0.081	4	0.0263	XP_002295925.1	MSKPLSEYWINSSHNTYLTGDQLTSRSSVEMYVKALYRGCRCMELDIWDGGKDEFGNPVPIVYHGHTMTSKILFEDIIKSFQVFLMMHPMTYPIILSLENHCSFPFQQVMAGQLRSILGKNLYIPDEQSLLGDLPSPSQLRGMVVLKGRRPSGATDDYDTDDDAAADDMTEQQSNLLNSEYQNDGLDDSVKIAPELAKLTLFHGTKFRTWEESSQTPTYHMHSFSESRVKAFSKSIQCHKWVEYNQTHMSRAFPSGKRVDSSNYSPILAWSTGCQMVALNFQTPDDPIRINDGRFRENGEQGYVLKPPSLLSKEETDPRSAMLEVKILSGSCLPKPGGVSFGECIDPYVIVSLFDCHEGKEVTSSQTTNAVFNNGFSPIWNFEDSFHFQVQNTCVAVMQ…	100	0	gi|224004548|ref|XP_002295925.1|	phospholipase C [Thalassiosira pseudonana CCMP1335]	39.33	3e-90	sp|A5D6R3|PLD3A_DANRE	1-phosphatidylinositol 4,5-bisphosphate phosphodiesterase delta-3-A OS=Danio rerio GN=plcd3a PE=2 SV=1	100	0	tr|B5YNJ7|B5YNJ7_THAPS	Phosphoinositide phospholipase C (Fragment) OS=Thalassiosira pseudonana GN=THAPS_263246 PE=4 SV=1	-	-	-	-	-	-	-	K05857|1|7e-74|249|ccp:CHC_T00005154001| phosphatidylinositol phospholipase C, delta [EC:3.1.4.11]	GO:0006629//lipid metabolic process;GO:0035556//intracellular signal transduction	GO:0004871//signal transducer activity;GO:0004435//phosphatidylinositol phospholipase C activity	GO:0005622//intracellular
138	ABK20830.1	50S ribosomal protein L13 (chloroplast) [Thalassiosira pseudonana]	15722.5	0.088	1	1	YP_874607.1;AIR76197.1;YP_009093524.1	0.33	0.113	4	0.006501	ABK20830.1	MNKTFIPASNYNKRKWYVIDCKDRQLGRLASTIVPLLTGKSKPIYHPSVDVGDYVILINTEYLKLDREIERFHVFEPGRPGSSLKRLVNVAPKRIIESCVFNMLPNGFPKKHLVKRLKVYQGTEHPHVAQAPQVIL	100	8e-98	gi|118411213|ref|YP_874607.1|	50S ribosomal protein L13 [Thalassiosira pseudonana]	52.27	3e-47	sp|P49551|RK13_ODOSI	50S ribosomal protein L13, chloroplastic OS=Odontella sinensis GN=rpl13 PE=3 SV=1	100	2e-96	tr|A0T0Z5|A0T0Z5_THAPS	50S ribosomal protein L13, chloroplastic OS=Thalassiosira pseudonana GN=rpl13 PE=3 SV=1	gi|428305844|ref|YP_007142669.1|	124	1e-35	COG0102	Ribosomal protein L13	J	Translation, ribosomal structure and biogenesis	K02871|1|9e-30|108|ppp:PHYPADRAFT_35792| large subunit ribosomal protein L13	GO:0006412//translation	GO:0003735//structural constituent of ribosome	GO:0005840//ribosome;GO:0009507//chloroplast
139	EJK58070.1	hypothetical protein THAOC_21830, partial [Thalassiosira oceanica]	8749.66	0.103	1	1	EJK57363.1	0.39	0.044	4	0.000479	EJK58070.1	RKVTVAPSDMIRTKLMNQPTDVKLYDGFVDCAKKTVAEGGVLSLWRGFIPIWARFAPQATLQLLSIEVIYDVMGFKGI	100	5e-52	gi|397602083|gb|EJK58070.1|	hypothetical protein THAOC_21830, partial [Thalassiosira oceanica]	43.66	1e-12	sp|Q6PH61|S2534_DANRE	Solute carrier family 25 member 34 OS=Danio rerio GN=slc25a34 PE=2 SV=1	100	1e-50	tr|K0RYH6|K0RYH6_THAOC	Uncharacterized protein (Fragment) OS=Thalassiosira oceanica GN=THAOC_21830 PE=3 SV=1	-	-	-	-	-	-	-	K15106|1|9e-13|64.7|cvr:CHLNCDRAFT_48477| solute carrier family 25 (mitochondrial carrier), member 14/30!K15112|2|2e-11|61.2|osa:4335985| solute carrier family 25 (mitochondrial uncoupling protein), member 27	GO:0006810//transport		GO:0016021//integral component of membrane
140	EJK76287.1	hypothetical protein THAOC_01961 [Thalassiosira oceanica]	22771.4	0.092	1	5	-	0.39	0.156	4	0.01536	EJK76287.1	MVKHNNVIPNIHCHKKYLESSRGPLKVKLSLNQAGKKKSRRLARAARAAAIAPRPLKLLRPAVHCQTQRYSAKVRLGKGFTLEELKAAGLTAKYARTIGIAVDHRRTNKSAESLAANVARLNEYKSKVIVFPKKRMSATKSGDSSAEECKAASQYSGTVLPLVKPAKEIVLEDVPEQEVSAFTQMRLAAKETRVAGHRASVANRKE	100	6e-123	gi|397644187|gb|EJK76287.1|	hypothetical protein THAOC_01961 [Thalassiosira oceanica]	47.06	8e-40	sp|P41128|RL131_BRANA	60S ribosomal protein L13-1 OS=Brassica napus PE=2 SV=1	100	2e-121	tr|K0TQM1|K0TQM1_THAOC	60S ribosomal protein L13 OS=Thalassiosira oceanica GN=THAOC_01961 PE=3 SV=1	-	-	-	-	-	-	-	K02873|1|6e-41|141|ppp:PHYPADRAFT_227920| large subunit ribosomal protein L13e			GO:0030529//ribonucleoprotein complex
141	XP_002296088.1	predicted protein [Thalassiosira pseudonana CCMP1335]	40992.8	0.048	1	1	ACI64805.1;ACI64802.1;XP_002296085.1	0.52	0.172	4	0.0261	XP_002296088.1	MGETHSLQGDDEEEEIASQEKEAAVYETEKEFSECLEEMAEVAISVGIMERWTPNKRVVKGKINKYVPWRNDDFGGDFVFEDVVEALTLYKELYKNFDSIEDDEFVVPEPVEESLRLSPFELAAMNSDSPDDLDDVDGPWDEGEDELSLEKHLAGMKLGQLVSRMRDGDLEVKHLPERKAKLDEIGFDWGDPKRFIDVPFDKVMCALYAYFMIRGDACVYLDTVPLGLPERMLADGPNGPPEKLSSWYNYDYVREFHERPGALTDVADWMRDIGFYQLAEEHEQKYGQSHYRQLYLLKEKLDNKEISQEIWDQEIDRIKQEVMGEFENWREGFNSNQGILVMDKNLRILHQ	100	0	gi|224004874|ref|XP_002296088.1|	predicted protein [Thalassiosira pseudonana CCMP1335]	-	-	-	-	100	0	tr|B5YMG5|B5YMG5_THAPS	Predicted protein OS=Thalassiosira pseudonana GN=THAPS_6780 PE=4 SV=1	-	-	-	-	-	-	-	-	-	-	-
142	XP_002290773.1	hypothetical protein THAPSDRAFT_262575, partial [Thalassiosira pseudonana CCMP1335]	35195.6	0.025	1	1	EED92525.1;EJK73551.1	0.62	0.122	4	0.01492	XP_002290773.1	LSTTLAGVPLTSCIYNASGPRTGSSAAMSKIALSASGGVLAKSATISSQTGNEQPRTWHEENGQASMNSEGLPNNGIDYYIDEKTIADTMGHNPLNKPYMVSISGKNIADNLQMLEKITDVIKNNPSAKIAAVELNLACPNIVGKPTIGYDFEQMEDVLKQVSSLPCFKGTPLFPLGLKMPPYFDRPHFEQAAAILNKYKDIVRYAASINTIGNALAIDHLAEMPAIRAKGGFAGLSGPAVKYTALANVKQMRELLDKSIDIVGVGGVESGKDAFEMLLCGARAVQVGTCHWNEGPGCFDRICNELESIMKEKGYDTVDDFRGKL	100	0	gi|224002202|ref|XP_002290773.1|	hypothetical protein THAPSDRAFT_262575 [Thalassiosira pseudonana CCMP1335]	43.38	2e-80	sp|A2RJT9|PYRDA_LACLM	Dihydroorotate dehydrogenase A (fumarate) OS=Lactococcus lactis subsp. cremoris (strain MG1363) GN=pyrDA PE=1 SV=1	100	0	tr|B8C398|B8C398_THAPS	Dihydroorotate dehydrogenase (fumarate) (Fragment) OS=Thalassiosira pseudonana GN=THAPSDRAFT_262575 PE=3 SV=1	gi|379732331|ref|YP_005317204.1|	280	6e-92	COG0167	Dihydroorotate dehydrogenase	F	Nucleotide transport and metabolism	K00207|1|7e-19|90.1|ppp:PHYPADRAFT_149277| dihydropyrimidine dehydrogenase (NADP+) [EC:1.3.1.2]	GO:0055114//oxidation-reduction process;GO:0006222//UMP biosynthetic process;GO:0006207//'de novo' pyrimidine nucleobase biosynthetic process	GO:0004152//dihydroorotate dehydrogenase activity	GO:0005737//cytoplasm
143	XP_002294653.1	mitochondrial alternative oxidase [Thalassiosira pseudonana CCMP1335]	30003	0.102	2	4	EED88013.1	0.67	0.169	4	0.04669	XP_002294653.1	MFTKTHGKYTKEELDIKMTHVEPESALDRLALFAVKVTRFGFDQATGWNRGSITTDKVLNRAIFLETVAAIPGMVAAIIRHFRSLRNMARDGGMLNMFLEEANNERMHLLTFIRMKDPGYLFRGAVVGSQFAFGSAFLVLYMISPAFCHRFVGYIEEEACATYTKIIKAIEEAPEGSDLAKWRTEEAPKIAKGYWHLGEEGTVLDVMRAVRADEAEHRDVNHAVSGVAHDTVNPLYDPREKMDSMMKRYVKDMMERSETKTATS	100	0	gi|224012000|ref|XP_002294653.1|	mitochondrial alternative oxidase [Thalassiosira pseudonana CCMP1335]	43.57	7e-62	sp|O74180|AOX_ASPNG	Alternative oxidase, mitochondrial OS=Aspergillus niger GN=aox1 PE=2 SV=2	100	0	tr|B8CF38|B8CF38_THAPS	Mitochondrial alternative oxidase OS=Thalassiosira pseudonana GN=AOX2 PE=4 SV=1	gi|209694266|ref|YP_002262194.1|	134	5e-37	COG2941	Demethoxyubiquinone hydroxylase, CLK1/Coq7/Cat5 family	H	Coenzyme transport and metabolism	K01868|1|8e-56|196|csl:COCSUDRAFT_64793| threonyl-tRNA synthetase [EC:6.1.1.3]!K17893|2|7e-49|168|egu:105033544| ubiquinol oxidase [EC:1.10.3.11]	GO:0007585//respiratory gaseous exchange;GO:0055114//oxidation-reduction process		GO:0005740//mitochondrial envelope;GO:0016020//membrane
144	XP_002290606.1	hypothetical protein THAPSDRAFT_34227, partial [Thalassiosira pseudonana CCMP1335]	49388.2	0.08	2	4	EED92358.1;EJK67089.1	0.76	0.013	4	7.256e-05	XP_002290606.1	LPALRDAPPNKREELFKLKLQLCGVIFSFDDPTSDKRGKDMKRQTLLELVDYVNTPAGQKIFTESVMSDLMAMVSANVCRALPPATDDFDPEEDEPVLEPAWPHLQVAYEFFLRFIVSSEVNAKAAKKYVDQRFCLQLVELFDSEDPRERDYLKTILHRIYGKFMSHRSFIRRAISNVFYRFVYETERHNGIGELLEILGSIINGFAIPLKKEHLQFLVRALIPLHKPKCVGLYHQQLSYCIIQYVEKDADTATPILNGFFKCWPWSCSGKQVLFLNELEEILELLGADQLNQISKTLFTNLARCLDSDHFQVVERALFLWNNEHLVNSGCLSRLNAQTVLPIIYGPLYKNSSGHWNATVEGLAQNVLKMYMEYDLVLYDQCTTAYFKEEEDAKKKIQA…	100	0	gi|224001868|ref|XP_002290606.1|	hypothetical protein THAPSDRAFT_34227 [Thalassiosira pseudonana CCMP1335]	54.31	3e-136	sp|Q9LU89|2A5N_ARATH	Serine/threonine protein phosphatase 2A 59 kDa regulatory subunit B' eta isoform OS=Arabidopsis thaliana GN=B'ETA PE=1 SV=1	100	0	tr|B8C2C0|B8C2C0_THAPS	Uncharacterized protein (Fragment) OS=Thalassiosira pseudonana GN=THAPSDRAFT_34227 PE=4 SV=1	-	-	-	-	-	-	-	K11584|1|1e-147|432|cre:CHLREDRAFT_127638| serine/threonine-protein phosphatase 2A regulatory subunit B'	GO:0007165//signal transduction	GO:0008601//protein phosphatase type 2A regulator activity	GO:0000159//protein phosphatase type 2A complex
145	EJK58017.1	hypothetical protein THAOC_21891 [Thalassiosira oceanica]	27749.6	0.186	1	4	-	0.39	0.138	4	0.01214	EJK58017.1	MSEERGRGGFGRGRGRGRGRGRGRGRGGGREENVWVPVTKLGRLVKEGKIGSIEEIFLFSIPVKEAEIIDYFLKDKLQDEVMKIMPVQKQSSAGQRTRFKAFVAVGDGAGHIGLGVKCSSEVATAIRGAILAAKLNVTPVRRGYWGRKSGMPHTVPTKVTGKCGSVRVRLIPAPRGTGLVSSPAGKRLLSMAGMDDCYTSTRGHTRTMGNFIKALFYALRNTYGYLEPDLWKENALTATPFQEHTDFLSKKAI	100	7e-165	gi|397601862|gb|EJK58017.1|	hypothetical protein THAOC_21891 [Thalassiosira oceanica]	73.15	4e-117	sp|P31009|RS2_DROME	40S ribosomal protein S2 OS=Drosophila melanogaster GN=RpS2 PE=1 SV=2	100	2e-163	tr|K0SHL7|K0SHL7_THAOC	Uncharacterized protein OS=Thalassiosira oceanica GN=THAOC_21891 PE=3 SV=1	gi|156938063|ref|YP_001435859.1|	184	2e-56	COG0098	Ribosomal protein S5	J	Translation, ribosomal structure and biogenesis	K02981|1|7e-114|330|csl:COCSUDRAFT_64056| small subunit ribosomal protein S2e	GO:0006412//translation	GO:0003735//structural constituent of ribosome;GO:0003723//RNA binding	GO:0015935//small ribosomal subunit
146	EED95034.1	predicted protein [Thalassiosira pseudonana CCMP1335]	29677.8	0.141	4	7	XP_002287591.1	0.63	0.107	4	0.01179	EED95034.1	MKSFSTTVLALVATIAVVPTSAFAPVSSNTRVAAPSSTTTSLASAVDDKTEVREYFNNEGFNRWNKIYSESDEVNSVQLDIRNGHDQTIQKILNWIKDDGDIKGKTVCDCGCGVGSLAIPLAQMGAEISASDISDAMATEAAARAKAMGIENAKFYTSDLESVTGKYNTVTCVDVAIHYPTEKMAEMVGHLCSLADERVLISFAPKTWYYDLLKKFGELFPGPSKTTRAYLHEESVVREALKKAGFEVAREEMTGTNFYFSRLLEAKRV	100	2e-168	gi|223995835|ref|XP_002287591.1|	predicted protein [Thalassiosira pseudonana CCMP1335]	57.47	1e-83	sp|Q9SW18|CHLM_ARATH	Magnesium protoporphyrin IX methyltransferase, chloroplastic OS=Arabidopsis thaliana GN=CHLM PE=1 SV=1	100	5e-167	tr|B8BW15|B8BW15_THAPS	Uncharacterized protein OS=Thalassiosira pseudonana GN=THAPSDRAFT_270378 PE=4 SV=1	gi|428308067|ref|YP_007144892.1|	282	9e-95	COG2227	2-polyprenyl-3-methyl-5-hydroxy-6-metoxy-1,4-benzoquinol methylase	H	Coenzyme transport and metabolism	K03428|1|3e-92|278|cre:CHLREDRAFT_195575| magnesium-protoporphyrin O-methyltransferase [EC:2.1.1.11]	GO:0015995//chlorophyll biosynthetic process;GO:0006479//protein methylation	GO:0046406//magnesium protoporphyrin IX methyltransferase activity;GO:0008276//protein methyltransferase activity	GO:0009507//chloroplast
147	YP_009093163.1	ribosomal protein L12 (chloroplast) [Roundia cardiophora]	13460.1	0.133	1	13	AIR75836.1	0.6	0.016	4	3.651e-05	YP_009093163.1	MSEKINQIVEELKTLTLLEASELVTAIEETFGVDASASVGGSIVMGAAPAAAEEVEEKTEFNVMLDEVPADKKIAVLKVVRTLTGLGLKEAKELVESAPKMVQEALSKDAAEDAKKQIEDAGGKVSLT	100	1e-70	gi|700658158|ref|YP_009093163.1|	ribosomal protein L12 (chloroplast) [Roundia cardiophora]	92.19	4e-62	sp|A0T0Q7|RK12_THAPS	50S ribosomal protein L12, chloroplastic OS=Thalassiosira pseudonana GN=rpl12 PE=3 SV=1	100	3e-69	tr|A0A089VHS3|A0A089VHS3_9STRA	50S ribosomal protein L12, chloroplastic OS=Roundia cardiophora GN=rpl12 PE=3 SV=1	gi|428307481|ref|YP_007144306.1|	164	1e-51	COG0222	Ribosomal protein L7/L12	J	Translation, ribosomal structure and biogenesis	K02863|1|9e-27|106|gsl:Gasu_40200| large subunit ribosomal protein L1!K02935|2|5e-26|99.8|sly:101253247| large subunit ribosomal protein L7/L12	GO:0006412//translation	GO:0003735//structural constituent of ribosome	GO:0005840//ribosome;GO:0009507//chloroplast
148	YP_009093501.1	ribosomal protein L3 (chloroplast) [Thalassiosira weissflogii]	22069.9	0.266	1	1	AIR76174.1	0.18	0.092	4	0.007034	YP_009093501.1	MSLGLLGNKIGMTQIFDESGNIIPVTILKVGPCVITQVKTTLNDGYNAIQVGYGNVSPKSLTQPQLGHLQKSNIQPLKYLKEFRVSDPNNFNVGQVLNVESFVAGQLINVTGKSIGKGFSGLQKRHNFARGPMTHGSKNHRAPGSIGMGTSPGRVLPGKKMAGQLGNKTTNIRKLKIVQVNNDENILVVKGAIPGKPGNLVSIVPSK	100	4e-146	gi|700082703|ref|YP_009093501.1|	ribosomal protein L3 (chloroplast) [Thalassiosira weissflogii]	94.2	4e-140	sp|A0T0X2|RK3_THAPS	50S ribosomal protein L3, chloroplastic OS=Thalassiosira pseudonana GN=rpl3 PE=3 SV=1	100	1e-144	tr|A0A089X984|A0A089X984_THAWE	50S ribosomal protein L3, chloroplastic OS=Thalassiosira weissflogii GN=rpl3 PE=3 SV=1	gi|428314333|ref|YP_007125310.1|	278	2e-94	COG0087	Ribosomal protein L3	J	Translation, ribosomal structure and biogenesis	K02906|1|3e-74|228|sind:105168351| large subunit ribosomal protein L3	GO:0006412//translation	GO:0003735//structural constituent of ribosome;GO:0019843//rRNA binding	GO:0005840//ribosome;GO:0009507//chloroplast
149	EJK48594.1	hypothetical protein THAOC_32593 [Thalassiosira oceanica]	198051	0.159	7	26	-	0.73	0.071	4	0.007279	EJK48594.1	MTDERTTTLAGPAHETKKSPPNKGHEAHGRGALPMDVITLQQLGIPETSIKHGLTTMESDRWIVSVEPTQVTLVDLQNQAQVTRRPIKAEAAIMNPATNILALRSGKMIQMFNLDTKSKLKSHDVDSPIVYWKWTSATNLALVTAASVYHWSSEGTSAPVKMFERHATIGANTQIINYQVSPDQKWCLLGGISAGAGGGVNGNMQLYSADKKVSQPLQGHAGAFCMVNLPGRDDPAQLLVFHEKKVDDPGHKLFVMEVGRDPSKGAPHRLPPTAIPVPAEAASDFPVSMVIDAKDDVAFLLSKMGFVYMFDIPSGKTMFRTRITQETVFVTCAQESTGAIFGITVRSGKVLRIGLNGPNLVPYIVNTLRDTDLAIKVAGRLGLPGAEHLYTQEFERLIG…	100	0	gi|397573193|gb|EJK48594.1|	hypothetical protein THAOC_32593 [Thalassiosira oceanica]	46.87	0	sp|Q68FD5|CLH1_MOUSE	Clathrin heavy chain 1 OS=Mus musculus GN=Cltc PE=1 SV=3	100	0	tr|K0R8W5|K0R8W5_THAOC	Clathrin heavy chain OS=Thalassiosira oceanica GN=THAOC_32593 PE=3 SV=1	-	-	-	-	-	-	-	K04646|1|0.0|1466|gra:105779595| clathrin heavy chain	GO:0016192//vesicle-mediated transport;GO:0006886//intracellular protein transport	GO:0005198//structural molecule activity	GO:0030130//clathrin coat of trans-Golgi network vesicle;GO:0030132//clathrin coat of coated pit
150	EED90143.1	predicted protein [Thalassiosira pseudonana CCMP1335]	75012.3	0.013	1	1	XP_002292168.1	0.68	0.119	4	0.01969	EED90143.1	MAPLPLTTQSTDGSLIGIHDTSSSIIRCYDGKITNGSLKFTLRCPSRTSGGADDTHHDDGAISKLLFASSSSSTPSYLVAQQNNSLLLFHLDRGVLAYTIDITRPSSSKKKKKKKQSSRKSSISAGDESNGVLCDVAAREGKLYVLVCYPSTSSEGDGSSGDKCRVFKYDLNSEGEKLEKKIKVGSVHGLNVATSSGGVEGMALAVSTNQMAIRMKNVLRICDFNGGKLCKIDLASGNNSGNRDEEGSGRCIMKYSVDGKYLVVSTASDNDEVVVLACEVDGEDCTLTPMALLKTKDDASISNLDVATDVDGASVLVLAFQPIGTASYFDIPTNTSSKSVDGMVPQLPTATLQTNPSPTSSVSSLMQASFHPNTPAKEILLLFKSALTGGGSGTTLPME…	100	0	gi|224006416|ref|XP_002292168.1|	predicted protein [Thalassiosira pseudonana CCMP1335]	-	-	-	-	100	0	tr|B8C7P5|B8C7P5_THAPS	Uncharacterized protein OS=Thalassiosira pseudonana GN=THAPSDRAFT_23900 PE=4 SV=1	-	-	-	-	-	-	-	-	-	-	-
151	EJK68078.1	hypothetical protein THAOC_10783 [Thalassiosira oceanica]	32923	0.065	1	2	-	0.49	0.163	4	0.02085	EJK68078.1	MSLNIYPEEVHKAELGDPAYYPEIDQYCDKIHRACKGFGTDEKALIAILGTKNAVERSLIAFRYPQMHSKKLKDLMKKENSGDFGFATQLLALPSIEYSKDLISLVSSEVSGDLKKLLVACLQGIEEVFDPAYHTESKAKEDAHDFYKKGVGKTFGTDEAALFEIICKAPPEYLKMIDTAYVSARNVNLEHALLKCLQGKAEAAAVFHLNMKLKPYETIATLIKSTCAGLGTDELGLTCAVIRYQHVLQQVTMAHIDLFGKTIGDRIVKETRGDFKKLLLEVVRVAWPDTPAS	100	0	gi|397626229|gb|EJK68078.1|	hypothetical protein THAOC_10783 [Thalassiosira oceanica]	27.44	7e-22	sp|P24639|ANXA7_DICDI	Annexin A7 OS=Dictyostelium discoideum GN=nxnA PE=1 SV=1	100	0	tr|K0SP13|K0SP13_THAOC	Uncharacterized protein OS=Thalassiosira oceanica GN=THAOC_10783 PE=4 SV=1	-	-	-	-	-	-	-	K17095|1|7e-17|82.8|sbi:SORBI_02g024090| annexin A7/11	-	-	-
152	XP_002292331.1	RS1, ribosomal protein 1, partial [Thalassiosira pseudonana CCMP1335]	31903.2	0.199	6	15	EED90306.1	0.83	0.061	4	0.01432	XP_002292331.1	VGFSYASFADAVAATDYAFNRNDIVKGTVVQYDKGGCIVDIGAKASAYLPLQEATLFQEQGQSIEGIIDIDEERQFEIISEEDENGQLLVSIRRIQYREAWDKVIAKQDSDEVFEAECVSVNRGGAIFLVEGLRAFLPGSHLTGRLPDDDLVGQTLPLKFLEVNQEDNKLVVSNRRAVVEEQMAELSRGDVIDGIVKALKPYGAFVEVGGMSGLLHISQISMDRITDLEQVLQPGQKIKCMIIDHDKVNGRIALSTKTLEPEPGDMIKDPARVYEMADETARVYLEK	100	0	gi|224006742|ref|XP_002292331.1|	RS1, ribosomal protein 1 [Thalassiosira pseudonana CCMP1335]	49.13	7e-92	sp|P46228|RS1_SYNP6	30S ribosomal protein S1 OS=Synechococcus sp. (strain ATCC 27144 / PCC 6301 / SAUG 1402/1) GN=rpsA PE=1 SV=4	100	0	tr|B8C8K9|B8C8K9_THAPS	RS1, ribosomal protein 1 (Fragment) OS=Thalassiosira pseudonana GN=RS1 PE=4 SV=1	gi|428224572|ref|YP_007108669.1|	285	3e-94	COG0539	Ribosomal protein S1	J	Translation, ribosomal structure and biogenesis	K02945|1|2e-84|261|mis:MICPUN_95520| small subunit ribosomal protein S1	GO:0006412//translation	GO:0003735//structural constituent of ribosome;GO:0003723//RNA binding	GO:0005840//ribosome;GO:0009536//plastid
153	EED93401.1	RL34, ribosomal protein 34 60S large ribosomal subunit [Thalassiosira pseudonana CCMP1335]	12876	0.071	1	8	XP_002289864.1;EJK74030.1	0.37	0.168	4	0.01916	EED93401.1	MVDHRVTRAGRHSYSTRSNRIRTIRTPGGRHVAQKIVKTSKGPRCSDCKCALPGIKHLKATAYKNLKKRERTVSRAYGGSACGGCVKQRIVRAFLLEEQKAVKKLLAERASKK	100	2e-66	gi|224000383|ref|XP_002289864.1|	RL34, ribosomal protein 34 60S large ribosomal subunit [Thalassiosira pseudonana CCMP1335]	55.34	2e-26	sp|Q54LV8|RL34_DICDI	60S ribosomal protein L34 OS=Dictyostelium discoideum GN=rpl34 PE=3 SV=1	100	4e-65	tr|B8BZT2|B8BZT2_THAPS	RL34, ribosomal protein 34 60S large ribosomal subunit OS=Thalassiosira pseudonana GN=RL34 PE=4 SV=1	-	-	-	-	-	-	-	K02915|1|1e-23|90.9|gsl:Gasu_19110| large subunit ribosomal protein L34e	GO:0006412//translation	GO:0003735//structural constituent of ribosome	GO:0005840//ribosome
154	EJK49989.1	hypothetical protein THAOC_31088, partial [Thalassiosira oceanica]	74294.5	0.042	1	10	-	0.67	0.061	4	0.002988	EJK49989.1	VGVGGAPNSFTSASLYVGDLLPEVNEGLLYEIFNAVGPVASIRVCRDAVTRRSLGYAYVNYHQAADAERALDSMNFTDIKGKPCRIMWSQRDPSVRRSGVGNIFVKNLHEGIDNKQLYDTFSLFGNILSCKVVCDRETGLSKGYGYVHYETNEAAASAIDKLDGMLIDGKEVQVGVFMRRDTRPDQEVYTNLFIKNMPYEWDDKRLEAEFAEFGEIVSASVKMGKRKKFAKKGKKAEAKKDEDDKEDGAEDKPAEEEKPEEEEAKPAEEEAKPESTEPESLGFGFVNFATHEAAAAAVEAMNDKVYKVTEDGDEVEKALFVGRAQKKSERQAELRSKYEAEKMERIAKFQGVNLYVKNLDDAVTDDMLRDEFGGMGTITSAKIMRDAKTNNSRGFGFVC…	100	0	gi|397575959|gb|EJK49989.1|	hypothetical protein THAOC_31088, partial [Thalassiosira oceanica]	52.04	1e-136	sp|Q6IP09|PABPB_XENLA	Polyadenylate-binding protein 1-B OS=Xenopus laevis GN=pabpc1-b PE=2 SV=1	100	0	tr|K0RCH9|K0RCH9_THAOC	Uncharacterized protein (Fragment) OS=Thalassiosira oceanica GN=THAOC_31088 PE=4 SV=1	gi|338175402|ref|YP_004652212.1|	76.3	6e-15	COG0724	RNA recognition motif (RRM) domain	J	Translation, ribosomal structure and biogenesis	K13126|1|1e-131|405|cvr:CHLNCDRAFT_59028| polyadenylate-binding protein		GO:0000166//nucleotide binding;GO:0003723//RNA binding	-
155	XP_002290667.1	cell division cycle protein 48 [Thalassiosira pseudonana CCMP1335]	97762.4	0.123	6	12	EED92419.1	0.82	0.031	4	0.001884	XP_002290667.1	MKGITATAAACCLVATTTSVSATLPPTGTFGVIRNNVRSSQAFGAGLSARGGSVEPARKASSSKKKKKKSKPSADVSASIAPAPKESSAKKPTPISDEKKDNSQAILQSASSRNSMRVFLYDASEGHTVVGMTESAMEQMSIFDGDTVSIKGKRGRKTVATVGEDGSYHGAIGMTQDAMKNAGVRAGDAVSVTAAPDVKFGKAVLILPYGDSVESAGVNMEEEGDALFKMYLRPYFEGKFRTLHRGDSFQVDGPNGLIEFQVVEIDSVEVDGDSACVVVDDTVIECEGEPIDRDDIDDLADAGYDTIGGASSHLAAVRELVELPLKHPELWTKLGINTPRGVLLTGPSGCGKTAMARAVAAETGAYFFVINGPEVISKRAGESETNLRRAFEDAEANAP…	100	0	gi|224001990|ref|XP_002290667.1|	cell division cycle protein 48 [Thalassiosira pseudonana CCMP1335]	56.02	0	sp|Q9LZF6|CD48E_ARATH	Cell division control protein 48 homolog E OS=Arabidopsis thaliana GN=CDC48E PE=2 SV=2	100	0	tr|B8C2N8|B8C2N8_THAPS	Cell division cycle protein 48 OS=Thalassiosira pseudonana GN=cdc48-2 PE=4 SV=1	gi|333910254|ref|YP_004483987.1|	635	0	COG1222	ATP-dependent 26S proteasome regulatory subunit	O	Posttranslational modification, protein turnover, chaperones	K13525|1|0.0|894|gsl:Gasu_41710| transitional endoplasmic reticulum ATPase	GO:0051301//cell division	GO:0017111//nucleoside-triphosphatase activity;GO:0005524//ATP binding	-
156	EED95372.1	spermidine synthase [Thalassiosira pseudonana CCMP1335]	107605	0.021	1	2	XP_002287929.1	0.72	0.048	4	0.002092	EED95372.1	MRLADATSLLIAATAGLLTLSSTIPSATLFATAETASCPGGVSPNAEGVCPNPDMLNDDDEESSSDDDEPVVRSSNPNAHRLEEGEEKPPTTCESYLKLPGFKDAVYETRSFYQEVAWSENANKPDVCMSLDDILQICHSYRPHYHEPYVHFPAAYMKDYKRIVFIGGGDAMLLHESLKYPNVELVLGLELDQKVVRESLKHFHTQPHFEDPRVQWWFGDAAKSLALLPREWFGTFDLVMVDLSETAMSISVTDDLDIFGALSLLMKPEGVFVKNELYYGQMSKLFDHSVFVYMTDYPILCDQDWAMGSNKVDFLHPQIEGGLVEQNKIRTFEYNPLEDEEEHYKLIKDYSRNDARKQGKCGDYDAEVEAAKKGGGEEKKEVVKPKSSAGVLMVVEVES…	100	0	gi|223996511|ref|XP_002287929.1|	spermidine synthase [Thalassiosira pseudonana CCMP1335]	31.66	7e-14	sp|B0K172|SPEE_THEPX	Polyamine aminopropyltransferase OS=Thermoanaerobacter sp. (strain X514) GN=speE PE=3 SV=1	100	0	tr|B8BUZ5|B8BUZ5_THAPS	Spermidine synthase OS=Thalassiosira pseudonana GN=THAPSDRAFT_21371 PE=4 SV=1	gi|317123142|ref|YP_004103145.1|	73.2	5e-12	COG0421	Spermidine synthase	E	Amino acid transport and metabolism	K00797|1|3e-14|77.4|zma:100279222| spermidine synthase [EC:2.5.1.16]	GO:0008295//spermidine biosynthetic process	GO:0004766//spermidine synthase activity;GO:0004014//adenosylmethionine decarboxylase activity	-
157	XP_002294103.1	predicted protein [Thalassiosira pseudonana CCMP1335]	73290.7	0.065	4	7	EED88458.1	0.65	0.112	4	0.01406	XP_002294103.1	MNPFDQFAGELSSALPQQSQQQPPVSSDASAISSFTQQMPPQQQQFSLMAQPPSNGTGMQPPPQQPAMNGMMQSGGQMGGSMYGGMGGQQQPPAPTMGQVPGGGMYGLQPQQQMMMPSQSMTGSMMAPSPMNGGMSSGGSVMGGAGLPPPMQQNQMAPFGGGMSVASGALVPSNNQSNPYALGPPQQQQMGQPYGMAPPPPQQQQQNNPMANPFGAPVPPPQQQQQMGMDPFGLAPPASTAPSNAMMPTDPWGTAPAPPAAPTQPAQIAADPWGAAPQQHQPSNALVPSTTSNDDPFGIFGTGTPAPPAENIASAIGAPPTTNPMMQQQQQPPSASVVPPPASDDPWADMGFGPPNPDAASQPPAPLEDEGDLFGGGLGAAATRAQQEAHAAQSSSTAS…	100	0	gi|224010291|ref|XP_002294103.1|	predicted protein [Thalassiosira pseudonana CCMP1335]	-	-	-	-	100	0	tr|B8CDH9|B8CDH9_THAPS	Uncharacterized protein OS=Thalassiosira pseudonana GN=THAPSDRAFT_10189 PE=4 SV=1	-	-	-	-	-	-	-	-		GO:0003676//nucleic acid binding;GO:0005524//ATP binding;GO:0008026//ATP-dependent helicase activity	-
158	EED96363.1	glutamine phosphoribosylpyrophosphate amidotransferase [Thalassiosira pseudonana CCMP1335]	60323.2	0.041	2	4	XP_002286722.1	0.7	0.028	4	0.0003832	EED96363.1	MCGILGLLLADEDALINQMLFDGLTVLQHRGQDAAGIVTSERGRLHLRKDNGLVKDVFQTHHMIDLRGNVGLGHVRYPTAGSSSCAEAQPLYTNYPHGICVAHNGNLTNAEELAELCRNKLKRHVNTDSDSEVLLNMFADSLIRCESKEEGNDVTVENIFSAVDTVMKSCKGGYAGMYLINGIALVGFRDPNGIRPIVFGSRKSTTKSSNGTALNDYVFASESVAVDTLGFDLVRDLKPSEAIVITMDGKVHTRCCLPPEQIHHAPCIFEYVYFARPDSIMDGISVYESRLKMGEKLAYQIMERYPEHDIDVVIPIPDTSRTSAVQAAYILGRPYREGFIKNRYIARTFIMPGQETRKKSVRLKLNTIKSEFAGRNVLLVDDSVVRGTTATEIIQMARD…	100	0	gi|223994077|ref|XP_002286722.1|	glutamine phosphoribosylpyrophosphate amidotransferase [Thalassiosira pseudonana CCMP1335]	58.42	0	sp|Q51342|PUR1_PSEAE	Amidophosphoribosyltransferase OS=Pseudomonas aeruginosa (strain ATCC 15692 / DSM 22644 / CIP 104116 / JCM 14847 / LMG 12228 / 1C / PRS 101 / PAO1) GN=purF PE=3 SV=3	100	0	tr|B8BQH3|B8BQH3_THAPS	Amidophosphoribosyltransferase OS=Thalassiosira pseudonana GN=THAPSDRAFT_39075 PE=3 SV=1	gi|53803332|ref|YP_114901.1|	607	0	COG0034	Glutamine phosphoribosylpyrophosphate amidotransferase	F	Nucleotide transport and metabolism	K00764|1|8e-168|489|ota:Ot12g00210| amidophosphoribosyltransferase [EC:2.4.2.14]	GO:0006164//purine nucleotide biosynthetic process;GO:0009113//purine nucleobase biosynthetic process;GO:0009116//nucleoside metabolic process	GO:0046872//metal ion binding;GO:0004044//amidophosphoribosyltransferase activity	-
159	EJK43711.1	hypothetical protein THAOC_37816 [Thalassiosira oceanica]	131775	0.067	1	1	-	0.55	0.059	4	0.001518	EJK43711.1	MSNLPPAIDFAKTEEEICSKWAEEGTFKKQDALSLERGDKEYTFYDGPPFATGLPHYGHILAGTIKDVVTRYACQTGHHVQRRAGWDCHGLPVEYEIDQKLNITHRDQVLAMGVDKYNETCRGIVTRYTKEWERTVNRLGRWIDFENDYKTMDPTFMESVWWVFKELFNKDLVYQGYKVMPFSTACGTPLSNFEAGLNYKDVRDPAVVVSFPLRDEEGVSFVAWTTTPWTLPSNIALCVHPTMEYVKVLDKKSGARYILAKARLPQIYPEMTKKKKWTPQKAAETLEVEATFQGSELVGKKYEPIFGYFANSEGSEEYFRILSDTYVTDDAGTGIVHQAPAFGEDDYRVCLSHKVIQKGKDLPCPVDSNGMFTDQVPEVKGLHVKKADETLIKLIKDSG…	100	0	gi|397563241|gb|EJK43711.1|	hypothetical protein THAOC_37816 [Thalassiosira oceanica]	54.3	0	sp|F4JLM5|SYIC_ARATH	Isoleucine--tRNA ligase, cytoplasmic OS=Arabidopsis thaliana GN=At4g10320 PE=2 SV=1	100	0	tr|K0R5E0|K0R5E0_THAOC	Uncharacterized protein OS=Thalassiosira oceanica GN=THAOC_37816 PE=3 SV=1	gi|374287483|ref|YP_005034568.1|	950	0	COG0060	Isoleucyl-tRNA synthetase	J	Translation, ribosomal structure and biogenesis	K01870|1|0.0|1175|cre:CHLREDRAFT_139213| isoleucyl-tRNA synthetase [EC:6.1.1.5]	GO:0006428//isoleucyl-tRNA aminoacylation;GO:0006450//regulation of translational fidelity	GO:0004822//isoleucine-tRNA ligase activity;GO:0002161//aminoacyl-tRNA editing activity;GO:0008270//zinc ion binding;GO:0005524//ATP binding	GO:0005737//cytoplasm
160	EJK74268.1	hypothetical protein THAOC_04063 [Thalassiosira oceanica]	14065.5	0.073	1	5	-	0.35	0.139	4	0.01172	EJK74268.1	MAKGKAAKKSTKKFVIDCAAPVDDKVLDIASFEKYLNERVKIEGKQGNLAPNGVQITRDRTKITVATPDAVKFSKRQLKYLSKRYLKKQQLRDYLRVIANSKNSYQLKYYQITDAGDEDADEE	100	1e-75	gi|397640699|gb|EJK74268.1|	hypothetical protein THAOC_04063 [Thalassiosira oceanica]	45.45	7e-32	sp|P52819|RL22_CAEEL	60S ribosomal protein L22 OS=Caenorhabditis elegans GN=rpl-22 PE=1 SV=3	100	3e-74	tr|K0T682|K0T682_THAOC	Uncharacterized protein OS=Thalassiosira oceanica GN=THAOC_04063 PE=4 SV=1	-	-	-	-	-	-	-	K02891|1|5e-35|120|ppp:PHYPADRAFT_122343| large subunit ribosomal protein L22e	GO:0006412//translation	GO:0003735//structural constituent of ribosome	GO:0005840//ribosome
161	EJK77308.1	hypothetical protein THAOC_00867, partial [Thalassiosira oceanica]	56521.2	0.039	2	3	EED88886.1;XP_002293877.1	0.66	0.017	4	5.782e-05	EJK77308.1	MIPPLANLMFFNVPADTRPGPAPARKIAPARAEQILAWMEKLRDAGGDDLDISPDKYTFNTVIHAYAKSGAKESAAKAHRILDNMNQMYREGNSSVKPDTITYNVVINAYAKSCGKGAAQEAENLLQRMHMMYDQGDLSVKPNVVTYGAVIDAFAKSMERNAAARADALLANMVALHQSDPVRHADLRPNTYVFNTVINAWAKSKERGAAAKAEEMLVAMDRLHASGFPGLKPDAFTYTAVIDAYAKSGFRGAASRADLLLDQMENKYANGDQDLKPNTFTYNAVINALAKSGETGAAARAERVLHNMVNRLRTSGMQDVKPTTINFNTVLDAWAKSGEGEQAAERAEAILEWMDRLSKSGNIDVKPDTITFNAVIDAWARSGSKRGPMRAEQILDHMD…	100	0	gi|397646528|gb|EJK77308.1|	hypothetical protein THAOC_00867, partial [Thalassiosira oceanica]	26.42	2e-24	sp|Q3EDF8|PPR28_ARATH	Pentatricopeptide repeat-containing protein At1g09900 OS=Arabidopsis thaliana GN=At1g09900 PE=2 SV=1	100	0	tr|K0TF03|K0TF03_THAOC	Uncharacterized protein (Fragment) OS=Thalassiosira oceanica GN=THAOC_00867 PE=4 SV=1	-	-	-	-	-	-	-	K17964|1|1e-27|121|smo:SELMODRAFT_96794| leucine-rich PPR motif-containing protein, mitochondrial	-	-	-
162	XP_002293757.1	stromal processing peptidase, partial [Thalassiosira pseudonana CCMP1335]	113951	0.025	1	2	EED88766.1	0.81	0.102	4	0.04232	XP_002293757.1	LPFHPNVKSGVLENGFSYVFLPNRSPPGRFEAHLQVFSGSADELEPQQGIAHLTEHVAYMGSRKRERLFGTGSQTNAYTDFHHTVFYAACPTTTPRGDTHMLPMALDALCDVMEARCEPSRIEKERQAVLSEMTMVNTIEYRVECQILSTLHRENRLAKRFPIGKESLIQSWQQDDVKTWHRTHYRPDNVLLYVVGDLDPDYVEKVVNDKFGHLTAEKQGSEIKIMDLKKEASTLADAVVGQTIKQAQSWHYPPVRHDFCAEVAPGKKIRPHIFKHELLQNFSFHLFAKRPVEPIKDMASFRHSLARRVCLAALQIRLNVNGRSDDPAFTFVEFNQLDSAREGCAVCSLDMTSEPNRWEEAVIKSISEIRKLGLYGVTPGEMERYASALLTDAEQLAAQ…	100	0	gi|224009598|ref|XP_002293757.1|	stromal processing peptidase [Thalassiosira pseudonana CCMP1335]	37.23	0	sp|Q40983|SPP_PEA	Stromal processing peptidase, chloroplastic OS=Pisum sativum GN=SPP PE=1 SV=2	100	0	tr|B8CCG1|B8CCG1_THAPS	Stromal processing peptidase (Fragment) OS=Thalassiosira pseudonana GN=SPP1 PE=4 SV=1	gi|16126873|ref|NP_421437.1|	195	3e-49	COG0612	Predicted Zn-dependent peptidase	R	General function prediction only	K17732|1|3e-12|73.9|ccp:CHC_T00009305001| mitochondrial-processing peptidase subunit beta [EC:3.4.24.64]	GO:0006508//proteolysis	GO:0004222//metalloendopeptidase activity;GO:0008270//zinc ion binding	-
163	EJK45982.1	hypothetical protein THAOC_35377 [Thalassiosira oceanica]	33712.8	0.091	1	1	-	0.63	0.175	4	0.03897	EJK45982.1	MFMRIAPELYLKMLVVGGLDRVYEIGRQFRNEGIDLTHNPEFTTCEFYQAYADYEDLMDMTEEMISGMVKDITGGYKIKYSPKPGADEVEIDFTPPFKRISMIEGIEEKIGKKLPAFDDPKIDAKLENILEEHGLECTPPLTTARLLDTLVGEFLEDNIVHPTFITEHPQIMSPLAKYHRSKPHLTERFELFACGRELANAYTELNNPVVQYQRFLEQASQGKEGDDEAMVMDDSFITALEHGLPPTGGWGLGIDRLTMFLTNRSNIKEVLLFPAMKPTDEQLAIVNAHKAANQKS	100	0	gi|397568150|gb|EJK45982.1|	hypothetical protein THAOC_35377 [Thalassiosira oceanica]	67.48	3e-135	sp|Q99MN1|SYK_MOUSE	Lysine--tRNA ligase OS=Mus musculus GN=Kars PE=1 SV=1	100	0	tr|K0RH78|K0RH78_THAOC	Uncharacterized protein OS=Thalassiosira oceanica GN=THAOC_35377 PE=4 SV=1	gi|499080453|ref|YP_007978062.1|	300	1e-97	COG1190	Lysyl-tRNA synthetase (class II)	J	Translation, ribosomal structure and biogenesis	K04567|1|4e-134|395|cam:101489914| lysyl-tRNA synthetase, class II [EC:6.1.1.6]	GO:0006414//translational elongation;GO:0006430//lysyl-tRNA aminoacylation	GO:0003746//translation elongation factor activity;GO:0004824//lysine-tRNA ligase activity;GO:0005524//ATP binding;GO:0000287//magnesium ion binding	GO:0005853//eukaryotic translation elongation factor 1 complex
164	AIR75501.1	ribosomal protein L18 (chloroplast) [Cyclotella sp. L04_2]	15497.6	0.074	1	2	AIR75642.1;YP_004072637.1;ADB27590.1	0.28	0.096	4	0.004805	AIR75501.1	MKFSKRVLLRLKNKNKKLKPDKYKKLKRESVRGLIKGTLERPRLSVFRSNENIYAQIIDDLTSKTLVSCSTLDRDIKLNSENGRTCNASRLMGEKLANLSKKKNITKIVFDRGPYLYHGRIKALADGARAGGLQF	100	3e-73	gi|691189987|gb|AIR75501.1|	ribosomal protein L18 (chloroplast) [Cyclotella sp. L04_2]	92.52	6e-68	sp|A0T0Y8|RK18_THAPS	50S ribosomal protein L18, chloroplastic OS=Thalassiosira pseudonana GN=rpl18 PE=3 SV=1	100	8e-72	tr|A0A089VGW9|A0A089VGW9_9STRA	50S ribosomal protein L18, chloroplastic OS=Cyclotella sp. L04_2 GN=rpl18 PE=3 SV=1	gi|430748630|ref|YP_007211538.1|	128	2e-37	COG0256	Ribosomal protein L18	J	Translation, ribosomal structure and biogenesis	K02881|1|4e-34|119|vcn:VOLCADRAFT_103908| large subunit ribosomal protein L18	GO:0006412//translation	GO:0003735//structural constituent of ribosome;GO:0019843//rRNA binding	GO:0005840//ribosome;GO:0009507//chloroplast
165	EJK63068.1	hypothetical protein THAOC_16293 [Thalassiosira oceanica]	71351	0.207	3	13	-	0.79	0.063	4	0.009652	EJK63068.1	MLFKKLAVAAVAVLGAVAPQAYADDEASMGTVIGIDLGTTYSCVGVFKNGRVEIMANDQGNRITPSYVAFMDNGDRLVGDAAKNQATINPENTVFDVKRLIGRNFSDKSVQADKKLVPYSIVSDQNKPVVAVTVAGKESKYAPEEVSAMILQKMKATAETFLGKEIKNAVVTVPAYFNDAQRQATKDAGTISGMKVERIINEPTAAAIAYGMDKTGGESNVLVFDLGGGTFDVTLLTIDNGVFEVLATNGDTHLGGEDFDQRVMQYFIKMMKKKSNTDISGDKRALQKLRKEVERVKRALSSQQQARLEIEDLAEGFDFSETLTRARFEELNNDLFKKTLGPVGRVLEDADVSKSEVDEIVLVGGSTRIPKVQSLISEYFGGKEPSKGINPDEAVAYGA…	100	0	gi|397614868|gb|EJK63068.1|	hypothetical protein THAOC_16293 [Thalassiosira oceanica]	71.94	0	sp|Q03685|BIP5_TOBAC	Luminal-binding protein 5 OS=Nicotiana tabacum GN=BIP5 PE=2 SV=1	100	0	tr|K0SA96|K0SA96_THAOC	Uncharacterized protein OS=Thalassiosira oceanica GN=THAOC_16293 PE=3 SV=1	gi|116249919|ref|YP_765757.1|	625	0	COG0443	Molecular chaperone DnaK (HSP70)	O	Posttranslational modification, protein turnover, chaperones	K09490|1|0.0|897|jcu:105645631| heat shock 70kDa protein 5	GO:0006950//response to stress	GO:0005524//ATP binding	-
166	XP_002294462.1	glutamate synthase [Thalassiosira pseudonana CCMP1335]	179710	0.064	4	7	EED88296.1	0.81	0.072	4	0.01732	XP_002294462.1	MRLSSAAIAAFLTASSYYTSTAFQTHQPRSLHLRRTTNTNGVNHVDSNDDSSNKKFVAALQAFKLEEGQQSNMFDGPRPLVKERDACGVGFIANTNSGDEFGTHKVLQEGLTALDCMEHRGACGGDGISGDGAGIMTQIPWKLFSEYRSDNCPQPGVGMVFLPRDETRRDQVKQVIESVCKANELDFMGWREVPVDPSTLGPNARAVVPSMWQMFVKAPQRLEDDEETRDGFERTLYLVRRRIAVELKNNGLTWDDDDGEVYFASFSSQTIVYKGMVQGCVLPQFYKDLQNEDYTTKFVIYHRRFSTNTNPRWPLAQPMRVVGHNGEINTLLGNVNWVKAREKSKVLDDVPSVLEPLVDLNRSDSANLDAVFELMTKSRHRAPCALMSLVPTAYENEPA…	100	0	gi|224011010|ref|XP_002294462.1|	glutamate synthase [Thalassiosira pseudonana CCMP1335]	55.36	0	sp|P55038|GLTS_SYNY3	Ferredoxin-dependent glutamate synthase 2 OS=Synechocystis sp. (strain PCC 6803 / Kazusa) GN=gltS PE=1 SV=2	100	0	tr|B8CE01|B8CE01_THAPS	Glutamate synthase OS=Thalassiosira pseudonana GN=glsF PE=4 SV=1	gi|428306539|ref|YP_007143364.1|	1766	0	COG0070	Glutamate synthase domain 3	E	Amino acid transport and metabolism	K00284|1|0.0|1564|egu:105057601| glutamate synthase (ferredoxin) [EC:1.4.7.1]	GO:0055114//oxidation-reduction process;GO:0006537//glutamate biosynthetic process;GO:0006807//nitrogen compound metabolic process	GO:0005488//binding;GO:0016041//glutamate synthase (ferredoxin) activity	GO:0009507//chloroplast
167	XP_002291401.1	t-complex protein 1 ETA subunit, partial [Thalassiosira pseudonana CCMP1335]	57829.7	0.032	2	3	EED91508.1	0.69	0.051	4	0.002015	XP_002291401.1	MRPGIILLREGTDTSQGKAQLISNINACQAVADAVRTTLGPRGMDKLVADGRRVTISNDGATIMRLLEIEHPAAKTLVDISMSQDAEVGDGTTSVVLLAVEILKQMKPFVEEGVHPQIIIRNIRSASSIAVQKVRDLSVSFDTSTTEGEEMLLKTASTALNSKLISTHQDLFAPMIVDAVKSLSAEVDGLDDLRGMIAIKKIPGGDVRQSFLVKGVAFKKTFSYAGFEQMTKKFADPKILLLNVELELKNEKENAEVRIEDPEQYQSIVDAEWQVIYDKLDACVACGANIVLSKLPIGDLATQYFADRGLFCAGRVEDGDLKRVAKATGATIQTSTNGIFDGVMGTCAVFEEKRVGDERFNIFTGCPNSLTSTMILRGGSEQFIAESERSIHDALMVVK…	100	0	gi|224003459|ref|XP_002291401.1|	t-complex protein 1 ETA subunit [Thalassiosira pseudonana CCMP1335]	63.23	0	sp|Q9SF16|TCPH_ARATH	T-complex protein 1 subunit eta OS=Arabidopsis thaliana GN=CCT7 PE=1 SV=1	100	0	tr|B8C5G9|B8C5G9_THAPS	T-complex protein 1 ETA subunit (Fragment) OS=Thalassiosira pseudonana GN=THAPSDRAFT_13653 PE=3 SV=1	gi|410671448|ref|YP_006923819.1|	366	3e-119	COG0459	Chaperonin GroEL (HSP60 family)	O	Posttranslational modification, protein turnover, chaperones	K09499|1|0.0|627|gra:105788092| T-complex protein 1 subunit eta	GO:0006457//protein folding	GO:0005524//ATP binding;GO:0051082//unfolded protein binding	GO:0005737//cytoplasm
168	EED88448.1	atp-dependent RNA helicase [Thalassiosira pseudonana CCMP1335]	52766.9	0.121	5	7	XP_002294093.1	0.69	0.015	4	4.858e-05	EED88448.1	MGGGSNFSNSNLGGTLHSIDFSSQQLIPFEKDFYIEHPDVSKRPETEAQAWRASKQIVIVGEGIPKPCMTFEEASMPEYVLSEVIKCGFDKPTPIQSQGWPMALKGKNMVGISATGSGKTLAFLLPAMIHINAQQYLKPGEGPIVLVLAPTRELAVQIKEECDKFGASSEIKNTVVYGGVPKSKQVRSLREGVEIVIATPGRLIDHLEQGNTNLKRVTYLVLDEADRMLDMGFEPQLRKIVSQIRPDRQVLMWSATWPKEVQNLARDYLSDFYQVTVGSLDLAGNKDVTQMIDVCSDQDKYRNLLRYLRENLTSKDRVLVFVETKKGCDMLTRSLRMDGFQARAMHGDKSQEERDWVLREFKSCQATLLVATDVAARGLDVDDIKMVVNFDFPNDTETY…	100	0	gi|224010271|ref|XP_002294093.1|	atp-dependent RNA helicase [Thalassiosira pseudonana CCMP1335]	59.86	0	sp|P0CQ76|DBP2_CRYNJ	ATP-dependent RNA helicase DBP2-A OS=Cryptococcus neoformans var. neoformans serotype D (strain JEC21 / ATCC MYA-565) GN=DBP2 PE=3 SV=1	100	0	tr|B8CDF5|B8CDF5_THAPS	Atp-dependent RNA helicase OS=Thalassiosira pseudonana GN=THAPSDRAFT_42515 PE=3 SV=1	gi|543963328|ref|YP_008546363.1|	313	1e-100	COG0513	Superfamily II DNA and RNA helicase	L	Replication, recombination and repair	K12823|1|0.0|566|csl:COCSUDRAFT_65263| ATP-dependent RNA helicase DDX5/DBP2 [EC:3.6.4.13]		GO:0003676//nucleic acid binding;GO:0005524//ATP binding;GO:0008026//ATP-dependent helicase activity	-
169	EJK50540.1	hypothetical protein THAOC_30460, partial [Thalassiosira oceanica]	66598	0.024	1	1	-	0.83	0.089	4	0.04039	EJK50540.1	GRAAGPDDVPRGPPAQHNDALPRRLRPTLPRDAGRRHVRRRRRGPVADRRGLAPRRVEAQGALVGVRRGDDGDRARGRRRAGGAGEGGGERPAVEQGFWRDVCGCYVSDEYDWMSCNASVLGLGLWPGGKRKTTAKPRDELRGRKQEHFAGHSIPLPPYVNLPSVQSIHDAASRFGLPLMLKSRKGAYDGRGNTVLKSTDDAAVSSALSDLGLTESDLPNDALYAEGWIDFRSEVAVMVVRSTTGETRAYPATTAIQTDSICRVVLVPARNVAPDVRERCESVAMAAVDCLGDGATGVFGVELFLVNKPGGGLDVLLNEVAPRPHNTGHYTQDACAVSQFENHLRAVCGLPLGDTGLVVGAAAMVNVLGAPSGGIEETMKGVNAAMTMPRTSVHWYGKG…	100	0	gi|397577316|gb|EJK50540.1|	hypothetical protein THAOC_30460, partial [Thalassiosira oceanica]	50.72	3e-127	sp|P0CQ36|PUR6_CRYNJ	Phosphoribosylaminoimidazole carboxylase OS=Cryptococcus neoformans var. neoformans serotype D (strain JEC21 / ATCC MYA-565) GN=ADE2 PE=3 SV=1	100	0	tr|K0RBF6|K0RBF6_THAOC	Uncharacterized protein (Fragment) OS=Thalassiosira oceanica GN=THAOC_30460 PE=3 SV=1	gi|184201397|ref|YP_001855604.1|	311	2e-96	COG0041	Phosphoribosylcarboxyaminoimidazole (NCAIR) mutase	F	Nucleotide transport and metabolism	K11808|1|9e-130|396|smo:SELMODRAFT_121407| phosphoribosylaminoimidazole carboxylase [EC:4.1.1.21]	GO:0006189//'de novo' IMP biosynthetic process	GO:0046872//metal ion binding;GO:0004638//phosphoribosylaminoimidazole carboxylase activity;GO:0005524//ATP binding;GO:0034023//5-(carboxyamino)imidazole ribonucleotide mutase activity	-
170	EED87030.1	predicted protein [Thalassiosira pseudonana CCMP1335]	97006.2	0.016	1	1	XP_002296829.1	0.64	0.118	4	0.0156	EED87030.1	MFYSLEVIPGDAYKVQKSGDETTGFTTKVVFTGVKDAQSAATNIDGVAADDAKPKSDDKVSKAKKMKQQPTKENVNSKTKPTTADATASVANELEATLSKKERQKLKRKAKKEAAKERKRLKLEAEKESSDDKPKPSEKAKSSSDQAPSSTKPSKKSKKDNTMKTSPTESSNSTSTAATQEEITQLQTTWSISTSTTLHTTLCTGLHSLNYSYPTPIQASTLPAAILGRRDVVGAAPTGSGKTLSYGLPILQWVLGLDDAEIAALDEEDSADAGEPKQKRPLQALILVPTRELAIQVTSELAIVSCHKVPIGTIVGGFAEVKQKRVLERKRPGVLVATPGRLWELMSSNEYSHLNDMSQLRFLVIDEADRMIKQGSFPQLKQIFEVINQANPPPQDDDE…	100	0	gi|224014332|ref|XP_002296829.1|	predicted protein [Thalassiosira pseudonana CCMP1335]	46.15	3e-34	sp|A3AVH5|RH13_ORYSJ	DEAD-box ATP-dependent RNA helicase 13 OS=Oryza sativa subsp. japonica GN=Os04g0510400 PE=2 SV=2	100	0	tr|B8LCS0|B8LCS0_THAPS	Predicted protein OS=Thalassiosira pseudonana GN=THAPSDRAFT_42599 PE=4 SV=1	gi|325108112|ref|YP_004269180.1|	120	7e-27	COG0513	Superfamily II DNA and RNA helicase	L	Replication, recombination and repair	K14805|1|8e-37|153|bpg:Bathy17g00940| ATP-dependent RNA helicase DDX24/MAK5 [EC:3.6.4.13]		GO:0003676//nucleic acid binding;GO:0005524//ATP binding;GO:0008026//ATP-dependent helicase activity	-
171	ADB27494.1	30S ribosomal protein S18 (chloroplast) [Thalassiosira oceanica CCMP1005]	8142.7	0.139	1	1	YP_874526.1;YP_009093443.1;EED86178.1;AIR76116.1;YP_004072540.1;ABK20749.1;sp|A0T0R4.1|RR18_THAPS;XP_002297538.1	0.65	0.085	4	0.006788	ADB27494.1	MLSQKHKLAPIGINQKIDYKDIDLLKLFITEQGKILPRRATGVTVQQQRQIAKAIKRARVLSLLPFVASNEL	100	2e-45	gi|315320484|ref|YP_004072540.1|	30S ribosomal protein S18 [Thalassiosira oceanica CCMP1005]	94.44	9e-44	sp|A0T0R4|RR18_THAPS	30S ribosomal protein S18, chloroplastic OS=Thalassiosira pseudonana GN=rps18 PE=3 SV=1	100	6e-44	tr|E7BWD6|E7BWD6_THAOC	30S ribosomal protein S18, chloroplastic OS=Thalassiosira oceanica GN=rps18 PE=3 SV=1	gi|22299604|ref|NP_682851.1|	89.7	5e-24	COG0238	Ribosomal protein S18	J	Translation, ribosomal structure and biogenesis	K02963|1|2e-18|75.1|ppp:PhpapaCp015| small subunit ribosomal protein S18	GO:0006412//translation	GO:0003735//structural constituent of ribosome;GO:0019843//rRNA binding	GO:0005840//ribosome;GO:0009507//chloroplast
172	EJK49980.1	hypothetical protein THAOC_31090 [Thalassiosira oceanica]	73708.6	0.013	1	2	-	0.58	0.053	4	0.001211	EJK49980.1	MAGESSDGVQHAPIAGPLASGTTPSLTLARSITCEGEALASIPPFDLFAAQLSSESTEAQVDAMKKLSVVGEAIGTEATLGKLVPYLAEMVAAGDDGDSAEDEILLLLAGQLGMLVPGLVPGNQAAPMVPILERLCTVEETVVRDKAVETMNKIVPLLLPGGTYDSGQPFSMLLGASKRLSTADWFTAKVSAAGVLPAVYAFYHAHGSRANGAEEAKRELRSLFKDLSEDDTPMVRRSAARHLGRFVESVAGLTETAEELIKSGKPQQTLADENKRLVTYELVPIFQALSSDEQDSVRLLAVSCAGSVGCGLAREPGDTAEVVLPVVRGGCEDLSWRVRHNLAKVFSTVAGSLGFGSSPKSSPKQSEVFKLFAGLLQDNEAEVRASAVENIARMAQIGG…	100	0	gi|397575947|gb|EJK49980.1|	hypothetical protein THAOC_31090 [Thalassiosira oceanica]	30.36	1e-76	sp|Q38950|2AAB_ARATH	Serine/threonine-protein phosphatase 2A 65 kDa regulatory subunit A beta isoform OS=Arabidopsis thaliana GN=PP2AA2 PE=1 SV=2	100	0	tr|K0R9Z7|K0R9Z7_THAOC	Uncharacterized protein OS=Thalassiosira oceanica GN=THAOC_31090 PE=4 SV=1	-	-	-	-	-	-	-	K03456|1|3e-82|275|mdm:103414247| serine/threonine-protein phosphatase 2A regulatory subunit A	-	-	-
173	XP_002287277.1	hypothetical protein THAPSDRAFT_21258 [Thalassiosira pseudonana CCMP1335]	64107.9	0.066	3	3	EED94720.1	0.61	0.118	4	0.01301	XP_002287277.1	MFGGAGKKKKEESLSSVLSPANPPKGGSNQSITGFDPEGLERAAKAARELDSSRNAAAAIDLIKTQEATKQHEAASKRAEMEAYSQQMRQQNIQAEAEEARKTLEAQTQHERHRSEYRDELERKRQVDMLNAQKYMQDEQLKKQEEMVERQEAMRRKTAEIEADLRTKTELAKTRAEAEGRIRQERENHDLILEKVHLEAVENRDTVLKAIEDGGKMLGEGLSNYLTDGEKLRNTAFMVSLAAVGVYSAKTGAGIAGRFIEARLGKPSLVRETSRVAASQILKHPISSIQRLTGIGMKSQDALKGIVLEEGLDSQLRKIAVSTAHTKKNRAPFRHLLLHGPPGTGKTMFAKGLAHHSGLEFAILTGGDIAPLGRDAVTEIHKLFEWAKTSRKGLLLFVD…	100	0	gi|223995187|ref|XP_002287277.1|	hypothetical protein THAPSDRAFT_21258 [Thalassiosira pseudonana CCMP1335]	50.65	0	sp|Q58E76|ATD3A_XENLA	ATPase family AAA domain-containing protein 3-A OS=Xenopus laevis GN=atad3-a PE=2 SV=1	100	0	tr|B8BU90|B8BU90_THAPS	Uncharacterized protein OS=Thalassiosira pseudonana GN=THAPSDRAFT_21258 PE=4 SV=1	gi|325960163|ref|YP_004291629.1|	90.9	7e-18	COG1223	Predicted ATPase, AAA+ superfamily	R	General function prediction only	K17681|1|5e-170|498|ccp:CHC_T00004941001| ATPase family AAA domain-containing protein 3A/B		GO:0017111//nucleoside-triphosphatase activity;GO:0005524//ATP binding	-
174	EJK46643.1	hypothetical protein THAOC_34681 [Thalassiosira oceanica]	28736	0.105	1	2	-	0.32	0.093	4	0.004248	EJK46643.1	MAKKSSKSSKAKAPAKAPSKADPLFPSKPRSFGVGGDVRPSGRDLSRFVRWPKYVRIQRQRAVLYQRLKVPPSINQFTKAIGKNEAASVFTLLNKYRPETPAQKKQRLKETAAGKAKAAGVPHQLKFGLKHVTTLVEEKKASLVLIACDVNPIELVLWLPALCRKMEVPFLIVKDKARLGTLVHQKTSAVVALTGVNKEDEKQLQIFRDLGIEKFNDNTDLMRKWGGGIMGLKTQAKLDKRAKALAVEEAKKQASLKR	100	7e-165	gi|397569278|gb|EJK46643.1|	hypothetical protein THAOC_34681 [Thalassiosira oceanica]	54.89	3e-82	sp|P0DJ14|RL7A_TETTH	60S ribosomal protein L7a OS=Tetrahymena thermophila GN=RPL7A PE=1 SV=1	100	2e-163	tr|K0R247|K0R247_THAOC	Uncharacterized protein OS=Thalassiosira oceanica GN=THAOC_34681 PE=4 SV=1	gi|13541280|ref|NP_110968.1|	63.2	5e-11	COG1358	Ribosomal protein L7Ae or related RNA K-turn-binding protein	J	Translation, ribosomal structure and biogenesis	K02936|1|9e-83|252|ccp:CHC_T00010252001| large subunit ribosomal protein L7Ae			GO:0030529//ribonucleoprotein complex
175	EED89061.1	coatomer protein subunit gamma [Thalassiosira pseudonana CCMP1335]	101271	0.021	1	2	XP_002293325.1	0.59	0.066	4	0.002417	EED89061.1	MGDQQDDGLNVNTLMKEVTSALDKFKLEDDEPGHSGGNYYSPYANLEKAAVLQEARCFHDPTAVRESPRKCCTVIAQLLHLTNTGQYLNSAEATEVFFGVTKLFMSDDASLRRMVYLFIKDVAETCDPDDVIIVTSSLTKDMTCDVDLYRANALRVLARIIDGAMLGAIERYVKQAVVDSSGQVSSAALVSATHLFERNEESKAIVKRWIGETQEATSSPNEMVQFHAMQLLYQIKKHDRLGMQKLVTQFSQRNSLKSPLALVLLVRYTAKLLHDENGSTFARSGYAFLEASLRHKNEMVVYEAARAICALPNIEPQELSPAVNVMQLFLSSPKPAVRFAAIKTVSQVAVHHPRIVSKCNEDLEALIGDANRSIATLAITTLLKTGSENSVDRLLKQIS…	100	0	gi|224008733|ref|XP_002293325.1|	coatomer protein subunit gamma [Thalassiosira pseudonana CCMP1335]	46.22	0	sp|Q0WW26|COPG_ARATH	Coatomer subunit gamma OS=Arabidopsis thaliana GN=At4g34450 PE=1 SV=2	100	0	tr|B8CB37|B8CB37_THAPS	Coatomer subunit gamma OS=Thalassiosira pseudonana GN=COP4 PE=3 SV=1	-	-	-	-	-	-	-	K17267|1|0.0|731|sind:105172881| coatomer subunit gamma	GO:0016192//vesicle-mediated transport;GO:0006886//intracellular protein transport	GO:0005198//structural molecule activity	GO:0030126//COPI vesicle coat
176	EJK47098.1	hypothetical protein THAOC_34210 [Thalassiosira oceanica]	27021.6	0.304	3	17	-	0.55	0.067	4	0.00217	EJK47098.1	MVKTPESVLKKQATQAKIAEQAKQACYEAKQKKRQNKKDAIAAAEKYAAEYKAADEASVANRRQAKAQGGFYVPAQPKIALIIRIRGIIGVSPKAKKIMQLFRLRQIHNATFVKLNESTIRMLRLIEPYVTYGYPTRTTIEKLIYKRGFGKLNKQRIPIADNSVIEEGVGSVGIKCCADLIHEISTVGPHFKEANNFLWPFKLTSPRGGFSNKTKLVHFLEGGEAGNRGEEINKLVKRMI	100	5e-150	gi|397569999|gb|EJK47098.1|	hypothetical protein THAOC_34210 [Thalassiosira oceanica]	53.36	6e-76	sp|P60040|RL72_ARATH	60S ribosomal protein L7-2 OS=Arabidopsis thaliana GN=RPL7B PE=1 SV=1	100	1e-148	tr|K0R2W9|K0R2W9_THAOC	Uncharacterized protein OS=Thalassiosira oceanica GN=THAOC_34210 PE=4 SV=1	gi|347524218|ref|YP_004781788.1|	77	1e-15	COG1841	Ribosomal protein L30/L7E	J	Translation, ribosomal structure and biogenesis	K02937|1|3e-80|244|pda:103714103| large subunit ribosomal protein L7e	GO:0006412//translation	GO:0003735//structural constituent of ribosome	GO:0005840//ribosome
177	EJK55222.1	hypothetical protein THAOC_25064 [Thalassiosira oceanica]	29612.8	0.08	1	5	-	0.61	0.056	4	0.0017	EJK55222.1	MGRGPKKHLKRLNAPRHWNLGKMGGVWAPKPSAGPHKQRECLPVAIILRERLKYALTGKECQQICMERCVKIDGKVRTDYNYPAGFMDIVELEKSGDIFRLLYDTKGRFVLHRVDKKEAEWKLCRIQKVYVTAKKIPVAVTHDGRTLRFPDPNVKVNDTVKVNIATGKMGEIFPFEMGSVVMVTKGHNAGRVGILQHLEKHDGSFSIVTVKDKKGNVFATRQSNVFIIGAGERVELSLPKGRGIKKNIIQERAEAEARGDL	100	0	gi|397590955|gb|EJK55222.1|	hypothetical protein THAOC_25064 [Thalassiosira oceanica]	59.13	2e-115	sp|O62739|RS4Y1_MONDO	40S ribosomal protein S4, Y isoform 1 OS=Monodelphis domestica GN=RPS4Y1 PE=2 SV=3	100	0	tr|K0S927|K0S927_THAOC	40S ribosomal protein S4 OS=Thalassiosira oceanica GN=THAOC_25064 PE=3 SV=1	gi|347524208|ref|YP_004781778.1|	162	2e-47	COG1471	Ribosomal protein S4E	J	Translation, ribosomal structure and biogenesis	K02987|1|5e-115|333|vcn:VOLCADRAFT_82986| small subunit ribosomal protein S4e	GO:0006412//translation	GO:0003735//structural constituent of ribosome;GO:0003723//RNA binding	GO:0005840//ribosome;GO:0016020//membrane;GO:0009536//plastid;GO:0044446//intracellular organelle part
178	XP_002293156.1	threonine dehydratase [Thalassiosira pseudonana CCMP1335]	56677.4	0.029	1	1	EED89617.1	0.7	0.127	4	0.02802	XP_002293156.1	MQTGDGYLGKILNANVYDVAVETELQHAKNLSQLLNNTIFLKREDTQPVFSFKIRGAYNKMASLPPSILKSRGVVACSAGNHAQGVALSAKRLGCRAVICMPLATPSIKVNAVRAHGGETVEVRLFGNNYDEAAAEAKRLEREEGLAMIHPFDDEHVIAGQGTIALEILKKCVSHPVDAIFVCCGGGGMLAGIAVYVKQVRPNIKVYGVEAADAAGMTASLAAGEVVTLPSVGLFADGAAVKTIGTETFRLCSQYVDGMVTVDTDQICNAIKLAYNDARVILEPAGALAVAGLKKHVEENHITGSTFVAITSGANMDFNRLRVVSERADDSERTLQVTIPETPGSFRAMYSKIWPRNVTEFSYRFESNQEANVFVSFQPLAHVENDFEAVMEDLVGDDF…	100	0	gi|224008394|ref|XP_002293156.1|	threonine dehydratase [Thalassiosira pseudonana CCMP1335]	55.82	3e-177	sp|P53607|ILVA_BURM1	L-threonine dehydratase biosynthetic IlvA OS=Burkholderia multivorans (strain ATCC 17616 / 249) GN=ilvA PE=3 SV=1	100	0	tr|B8CA45|B8CA45_THAPS	Threonine dehydratase OS=Thalassiosira pseudonana GN=THAPSDRAFT_42074 PE=3 SV=1	gi|217969138|ref|YP_002354372.1|	552	0	COG1171	Threonine dehydratase	E	Amino acid transport and metabolism	K01754|1|5e-164|481|gsl:Gasu_26990| threonine dehydratase [EC:4.3.1.19]	GO:0009097//isoleucine biosynthetic process	GO:0030170//pyridoxal phosphate binding;GO:0004794//L-threonine ammonia-lyase activity	-
179	ACI64872.1	RL18, ribosomal protein 18, 60S large ribosomal subunit [Thalassiosira pseudonana CCMP1335]	21446.6	0.068	1	3	XP_002296155.1	0.47	0.164	4	0.01957	ACI64872.1	MGIDLKAGGRRTGHKSSMKVIKTQNPYSRLLIKLYKFLSRRTDSKFCATVAKRLHMSKTNAPPIGLNRLAKYMTNKSDKTAVIVGKVTDDVRMLECPKMSVCAISFTENARKRIVAAGGECITLDQLALRAPTGANTVLLRGPASREALAHFGKRTSVTNPHAYDGVKPFVRSKGRKFEKARGRRKSRGFKV	100	7e-140	gi|224005008|ref|XP_002296155.1|	RL18, ribosomal protein 18, 60S large ribosomal subunit [Thalassiosira pseudonana CCMP1335]	59.07	5e-71	sp|P42791|RL182_ARATH	60S ribosomal protein L18-2 OS=Arabidopsis thaliana GN=RPL18B PE=1 SV=2	100	2e-138	tr|B5YMU6|B5YMU6_THAPS	RL18, ribosomal protein 18, 60S large ribosomal subunit OS=Thalassiosira pseudonana GN=RL18 PE=4 SV=1	gi|336121978|ref|YP_004576753.1|	59.3	4e-10	COG1727	Ribosomal protein L18E	J	Translation, ribosomal structure and biogenesis	K02883|1|2e-77|233|ppp:PHYPADRAFT_162579| large subunit ribosomal protein L18e	GO:0006412//translation	GO:0003735//structural constituent of ribosome	GO:0022626//cytosolic ribosome;GO:0043231//intracellular membrane-bounded organelle;GO:0016020//membrane
180	EJK56825.1	hypothetical protein THAOC_23204, partial [Thalassiosira oceanica]	89810.9	0.049	1	1	-	0.55	0.11	4	0.008737	EJK56825.1	QALAEKLVDAANADGIRLPVDSPGLVSAVNSVVEGSVLEDKPYVSRAVSLARLGVLLAQARSLSAKSVCDPISALSAERLGQYLTLDAFSTTNYDELRPHRGCVESASVLRTCLAGSTMVASSKTLKQPEGSDATCVKYAKSAPQYHGPAREAIASACKTMELELNCSEGGDAAELDDSIALLACASALGGITTLVNGSSSRIGSDSKCDAGSPSTLSTMANALESAVEQLKAALESEAKLGCDYVVSELSKREAELKAKEAEKAKRTAERAGSGNPNQKGDKDEFAGMTEAQKAKILKKRAEKEAKAAAKAKAKKAKAAGGEAALSSIFGTGTAFLYPLLSGKDLDLSNSALLESLEGAIEKLQSGGMQRKPKVALGTRDYLPEQMAIRQQAFSIIRR…	100	0	gi|397596695|gb|EJK56825.1|	hypothetical protein THAOC_23204, partial [Thalassiosira oceanica]	56.35	4e-167	sp|Q86AS6|SYHC_DICDI	Histidine--tRNA ligase, cytoplasmic OS=Dictyostelium discoideum GN=hisS PE=3 SV=1	100	0	tr|K0RV05|K0RV05_THAOC	Uncharacterized protein (Fragment) OS=Thalassiosira oceanica GN=THAOC_23204 PE=4 SV=1	gi|269836508|ref|YP_003318736.1|	286	2e-86	COG0124	Histidyl-tRNA synthetase	J	Translation, ribosomal structure and biogenesis	K01892|1|6e-172|509|cvr:CHLNCDRAFT_36479| histidyl-tRNA synthetase [EC:6.1.1.21]	GO:0006427//histidyl-tRNA aminoacylation	GO:0005524//ATP binding;GO:0016841//ammonia-lyase activity;GO:0004821//histidine-tRNA ligase activity	GO:0005737//cytoplasm
181	EJK43726.1	hypothetical protein THAOC_37793 [Thalassiosira oceanica]	58795.8	0.04	1	1	-	0.69	0.113	4	0.01837	EJK43726.1	MIICVAIALAALFGSGQLEGVLGEEEYEPKYDIAPIPTVSSSKLQIHVPKTLTKAGGGYAHREALFGIPPYGGSIAQQLYYADDTLCENKPGVTRGGYPIRAKDESGEMMPWQSPYILMVDRGGCTFVQKVRNAQRVGAAGVIIADNTCLCSAGDQCHSDPGRDCEEREPIMADDGSGSDISIPSFLMFKEDADEVKAELQANHHVRIEMTWSLPSPDDRVEYELWTTPTDVISRDFQKDFKMAAVALGDRAYFTPQQYIYDGIRSGCQGIDGENDCFNLCSNNGRYCATDPDNDLDRGISGADVVGESLRRMCVWKLYGKKDGVGTEWWDYVNEFLFRCNSEEFFASKQCVSDAMGHARVDPAKVDACMEDSGGLEGDTQNSMLESQLVAKDKSGVVI…	100	0	gi|397563266|gb|EJK43726.1|	hypothetical protein THAOC_37793 [Thalassiosira oceanica]	34.62	1e-57	sp|P93484|VSR1_PEA	Vacuolar-sorting receptor 1 OS=Pisum sativum GN=BP80 PE=1 SV=1	100	0	tr|K0R5E7|K0R5E7_THAOC	Uncharacterized protein OS=Thalassiosira oceanica GN=THAOC_37793 PE=4 SV=1	-	-	-	-	-	-	-	-	-	-	-
182	EED94357.1	probable isoleucine-trna synthetase [Thalassiosira pseudonana CCMP1335]	125130	0.034	3	9	XP_002288921.1	0.73	0.08	4	0.009996	EED94357.1	MGSLNLNSAPKGTAKRDALVSSEIAVQALWEREKAFESNPTYKEDGTSEDKFIVTFPYPYSNGHLHLGHAFSLTKAVFRAQFERNRGKNSLFPFAFHCTGMPIQAAANKLKSEITQYGIPPKFPEEDPAVRAQMEADLAAAAKAKAEKAAASGSKAKGGKTKLVQKTGTGIVRQWNILKRMVPEEEIPEFADPIHWLKYFPPIGVEHMKRFGSGVDWRRSFITTAVNGYYDAFIRWQFNVLREKGKVLFGKRNNVYSILDGQVCADHDRSEGEGVGPQEYVLIKLKVLEPDHGQARHGKMEALLKRVEDEGKKGVFMVPATLRPETMYGQTNCFVLPTGEYGAYYIDATDEVFIMSARSARGLSCQAYDAANDVYFTKEFGKIECLETFTGDELLGLPL…	100	0	gi|223998496|ref|XP_002288921.1|	probable isoleucine-trna synthetase [Thalassiosira pseudonana CCMP1335]	44.87	0	sp|Q09996|SYLC_CAEEL	Leucine--tRNA ligase OS=Caenorhabditis elegans GN=lrs-1 PE=3 SV=2	100	0	tr|B8BYD7|B8BYD7_THAPS	Probable isoleucine-trna synthetase OS=Thalassiosira pseudonana GN=ITS3 PE=3 SV=1	gi|147920653|ref|YP_685547.1|	500	5e-159	COG0495	Leucyl-tRNA synthetase	J	Translation, ribosomal structure and biogenesis	K01869|1|0.0|920|ats:F775_21603| leucyl-tRNA synthetase [EC:6.1.1.4]	GO:0006450//regulation of translational fidelity;GO:0006429//leucyl-tRNA aminoacylation	GO:0002161//aminoacyl-tRNA editing activity;GO:0004823//leucine-tRNA ligase activity;GO:0005524//ATP binding	GO:0005737//cytoplasm
183	ABK20818.1	50S ribosomal protein L14 (chloroplast) [Thalassiosira pseudonana]	13463.3	0.215	2	8	YP_004072632.1;YP_009093512.1;AIR76185.1;AIR75496.1;AIR75637.1;ADB27585.1;sp|A0T0Y3.1|RK14_THAPS;YP_874595.1	0.45	0.086	4	0.003446	ABK20818.1	MIYPQTMLTVADNTGAKKIMCIRVLGGNRKYGKIGDTIIGVVKEAIPNMPIKKSDVVRAIIVRTSKTIRRADGMYIRFDDNAAVIVNMENNPRGTRVFGPVAREIRDKNFSKIVSLAPEVL	100	2e-82	gi|118411201|ref|YP_874595.1|	50S ribosomal protein L14 [Thalassiosira pseudonana]	100	3e-83	sp|A0T0Y3|RK14_THAPS	50S ribosomal protein L14, chloroplastic OS=Thalassiosira pseudonana GN=rpl14 PE=3 SV=1	99.17	2e-80	tr|A0A089VGW3|A0A089VGW3_9STRA	50S ribosomal protein L14, chloroplastic OS=Cyclotella sp. L04_2 GN=rpl14 PE=3 SV=1	gi|428320026|ref|YP_007117908.1|	191	6e-63	COG0093	Ribosomal protein L14	J	Translation, ribosomal structure and biogenesis	K02874|1|9e-61|185|ota:OstapCp37| large subunit ribosomal protein L14	GO:0006412//translation	GO:0003735//structural constituent of ribosome;GO:0019843//rRNA binding	GO:0015934//large ribosomal subunit;GO:0009507//chloroplast;GO:0005739//mitochondrion
184	EED86175.1	predicted protein [Thalassiosira pseudonana CCMP1335]	34233.8	0.271	1	1	YP_874531.1;sp|A0T0R9.1|CYF_THAPS;ABK20754.1;XP_002297535.1	0.43	0.162	4	0.01761	EED86175.1	MATNKFFKSLLFTLTIAISSFGFCVENSSAYPVFAQQGYSNPRAANGKLACANCHLNQKAIEIEAPQGVLPNSVFEIEIKVPYDVNRQQISADGKPADLNVGGILILPKGFKLASKTQISPEVKAKNKGVFISPYSTEFDNILVVGPIAGKTHQELIFPVVAPDPENNPDVKYLTYPFYAGGNRGRGQVYPTGERSNINSFGATQGGQITEITTTEKGESKITIVNSDGATTSQTLSAGLKLLVKQGDIVKQDQPLNIDPNVGGFGQEESEIVLQSSSRILGYLAFCFCLLLTQVLLVLKKKQYEKVQAAELNF	100	0	gi|118411137|ref|YP_874531.1|	cytochrome f [Thalassiosira pseudonana]	100	0	sp|A0T0R9|CYF_THAPS	Cytochrome f OS=Thalassiosira pseudonana GN=petA PE=3 SV=1	100	0	tr|B8LET5|B8LET5_THAPS	Predicted protein OS=Thalassiosira pseudonana GN=THAPSDRAFT_bd573 PE=3 SV=1	gi|434384396|ref|YP_007095007.1|	297	2e-98	COG3258	Cytochrome c	C	Energy production and conversion	K02634|1|9e-92|279|ccp:CHC_735| apocytochrome f	GO:0015979//photosynthesis;GO:0022900//electron transport chain	GO:0009055//electron carrier activity;GO:0005506//iron ion binding;GO:0020037//heme binding	GO:0031361//integral component of thylakoid membrane;GO:0009535//chloroplast thylakoid membrane
185	AIR75421.1	ribosomal protein S2 (chloroplast) [Cyclotella sp. L04_2]	25765	0.195	4	14	AIR75562.1;sp|A0T0Q8.1|RR2_THAPS;EED86156.1;ABK20743.1;YP_874520.1;XP_002297516.1	0.59	0.134	4	0.01715	AIR75421.1	MADINLAQLLEAGVHFGHKAYRWNPKMFPYIYTERNNIHILDLVQTAQLLKRANSYVKNAALEGKTFLFVGTKRQASALIAQEAKRCPSGYYVNHRWLGGMLTNWTTLKSRIERLKTLEQQEVEGIFKLLPKKEASLRLKELEKLRKHLNGVKDMTKLPDVAIIIDQKREITAIKECRKLGIPIISILDTNCDPDLVDVPIPGNDDAVRSIKLILNSLTNSIISVA	100	8e-152	gi|691189907|gb|AIR75421.1|	ribosomal protein S2 (chloroplast) [Cyclotella sp. L04_2]	93.27	1e-143	sp|A0T0Q8|RR2_THAPS	30S ribosomal protein S2, chloroplastic OS=Thalassiosira pseudonana GN=rps2 PE=3 SV=1	100	2e-150	tr|A0A089VGL7|A0A089VGL7_9STRA	30S ribosomal protein S2, chloroplastic OS=Cyclotella sp. L04_2 GN=rps2 PE=3 SV=1	gi|158336564|ref|YP_001517738.1|	323	1e-110	COG0052	Ribosomal protein S2	J	Translation, ribosomal structure and biogenesis	K02967|1|2e-78|238|ppp:PhpapaCp057| small subunit ribosomal protein S2	GO:0006412//translation	GO:0003735//structural constituent of ribosome	GO:0015935//small ribosomal subunit;GO:0009507//chloroplast;GO:0005739//mitochondrion
186	ABK20837.1	ATP-dependent clp protease ATP-binding subunit (chloroplast) [Thalassiosira pseudonana]	102409	0.053	1	5	YP_874614.1	0.65	0.152	4	0.03304	ABK20837.1	MFEKFTEGAIKVIMLAQEESRRMGHNFVGTEQVLLGILGQRHGIAGRALAQLNVTLKKTRKEVEKYIGRGTGFVASEIPFTPRAKRVLEMSIHEAQDLGVNYVGTEHILLSLLNEADGIALRTLDRLRVNIPKLRHLIFTYIEEQQEDILKPPLSDQEKWLLSREKGNKWTTSTLENYSENITQEALDKRLDPVIGRNEEINALVKVLGRRRKNNPVLVGEAGVGKTACAEGLALLMVSGECPEFLDNHAVLCLDLGSVLAGTKYRGEFEERMKTIIEDVQKNGKIILVIDEIHTIVGAGAAEGAVDAANLLKPALARGTLRLIGATTLDEYRKYIEKDPALERRFHSIVVEEPTVEVTIDILNGLRPEFQRHHALTYSSDSLTAAAQLASRFITDRNL…	100	0	gi|118411220|ref|YP_874614.1|	ATP-dependent clp protease ATP-binding subunit [Thalassiosira pseudonana]	64.26	0	sp|P49574|CLPC_ODOSI	ATP-dependent Clp protease ATP-binding subunit ClpA homolog OS=Odontella sinensis GN=clpC PE=3 SV=1	100	0	tr|A0T102|A0T102_THAPS	ATP-dependent clp protease ATP-binding subunit OS=Thalassiosira pseudonana GN=clpC PE=3 SV=1	gi|428303861|ref|YP_007140686.1|	915	0	COG0542	ATP-dependent Clp protease ATP-binding subunit ClpA	O	Posttranslational modification, protein turnover, chaperones	K03696|1|0.0|834|vcn:VOLCADRAFT_75431| ATP-dependent Clp protease ATP-binding subunit ClpC	GO:0006508//proteolysis	GO:0008233//peptidase activity;GO:0005524//ATP binding;GO:0017111//nucleoside-triphosphatase activity	GO:0009507//chloroplast
187	EJK71823.1	hypothetical protein THAOC_06697 [Thalassiosira oceanica]	21752.8	0.179	2	6	-	0.51	0.155	4	0.02269	EJK71823.1	MPTNAQHRNYRKTYKTPRRPYEKERLDAELKLVGEYGLRCKREIWRVQYALAKLRKAARVLLTLDPKDPKRIFEGAALLRRMSRYGLLADDELELDFVLQLTTQKLLERRLQTKVFKQGLAKSIHHARVLIRQRHISVGGQLVNVPSFNVRTSSEKHIDISANSPYGQGAPGRVAKKRAAAKAAAGEDDE	100	3e-117	gi|397635346|gb|EJK71823.1|	hypothetical protein THAOC_06697 [Thalassiosira oceanica]	73.21	1e-80	sp|Q9FLF0|RS92_ARATH	40S ribosomal protein S9-2 OS=Arabidopsis thaliana GN=RPS9C PE=1 SV=1	100	7e-116	tr|K0SZN6|K0SZN6_THAOC	Uncharacterized protein OS=Thalassiosira oceanica GN=THAOC_06697 PE=3 SV=1	gi|557695036|ref|YP_008798090.1|	127	7e-36	COG0522	Ribosomal protein S4 or related protein	J	Translation, ribosomal structure and biogenesis	K02997|1|8e-83|246|cre:CHLREDRAFT_195593| small subunit ribosomal protein S9e	GO:0006412//translation	GO:0003735//structural constituent of ribosome;GO:0019843//rRNA binding	GO:0015935//small ribosomal subunit;GO:0016020//membrane;GO:0009536//plastid;GO:0071944//cell periphery
188	EJK59471.1	hypothetical protein THAOC_20301 [Thalassiosira oceanica]	517129	0.005	1	1	-	0.7	0.091	4	0.01154	EJK59471.1	MSNQRAIYTAKHAFNGQRAQNQLSFPIGARIVAAPNQLGAWWWGNCNGADGWFPPAYVALSQQAPQANVMAVQQPQQPQQRQTQQFGSSISPRHQTQSRGVAPQHAQGFGVQAVNQSVNVALQQSTQPGGMGSMSSPPVKSGFHAGTEDPFAELQSSPLPTPTAAAPGATGITGMAPGQMNNAAPLVDPLSSSMPIGTTPTNLAKPSMASNTPVNPALANIFADASGGNRGRAGTGSSAGSGGLPTPAATPSTVAHQTAAARDQSATPGVPVQLSAGTASSRPIQPASDTLRTSSGVDAPTGKTGPSASAVTGAPRLSVDTSSPKESISSPVNNVASSRSAESSTMSTASGKITTPSSSATVSTPRPVSTPRKTSQTPVRQSVHKGLGNSGARLPDSIT…	100	0	gi|397606868|gb|EJK59471.1|	hypothetical protein THAOC_20301 [Thalassiosira oceanica]	-	-	-	-	100	0	tr|K0SEU5|K0SEU5_THAOC	Uncharacterized protein OS=Thalassiosira oceanica GN=THAOC_20301 PE=4 SV=1	gi|297620488|ref|YP_003708625.1|	77	2e-11	COG1196	Chromosome segregation ATPase	D	Cell cycle control, cell division, chromosome partitioning	K13448|1|2e-07|57.8|vra:106759275| calcium-binding protein CML		GO:0005509//calcium ion binding	-
189	EJK51400.1	hypothetical protein THAOC_29426 [Thalassiosira oceanica]	62543.8	0.073	1	1	-	0.61	0.127	4	0.01619	EJK51400.1	MASQGPPGMGPVMVLNSKTQRTHGRQAQLGNIAAARAVADIIRSTLGPRSMLKMLLDPMGGIVITNDGNCILREVDVSHPTAKSMIELSRAQDEEVGDGTTSVIILAGEMLINAEPFARANVHPTVIVRGYNYALQEALSICEKLALTVDVKDTERMKDLVQSCIGTKFSSRWNDIMIDMALKAVLTVARETPMPSLLPGDGSSMYSQKMEVDIKRYAKVEKIPGGEISDCTVLSGVMFNKDVTHSKMRRRIENPRILLLDTPLEYKKGESQTNVEITDEEDWNTLLKMEEEYVENMCMEIIAFKPDIVITEKGVSDLAQHYFAKADITAFRRLRKTDNNRVARATGATIVSRTDEIRESDIGTGCGLFEMRKIGEEYFAFFEECKEPKACTVILRGGS…	100	0	gi|397579955|gb|EJK51400.1|	hypothetical protein THAOC_29426 [Thalassiosira oceanica]	90.39	0	sp|Q9LKI7|TCPG_THAWE	T-complex protein 1 subunit gamma OS=Thalassiosira weissflogii PE=2 SV=1	100	0	tr|K0RDU0|K0RDU0_THAOC	T-complex protein 1 subunit gamma OS=Thalassiosira oceanica GN=THAOC_29426 PE=3 SV=1	gi|11499046|ref|NP_070280.1|	408	3e-135	COG0459	Chaperonin GroEL (HSP60 family)	O	Posttranslational modification, protein turnover, chaperones	K09495|1|0.0|700|mis:MICPUN_59360| T-complex protein 1 subunit gamma	GO:0006457//protein folding	GO:0051082//unfolded protein binding;GO:0005524//ATP binding	GO:0005737//cytoplasm
190	EED91184.1	RS24, ribosomal protein 24 40S small ribosomal subunit [Thalassiosira pseudonana CCMP1335]	15339.3	0.168	2	11	XP_002291077.1	0.62	0.187	4	0.04492	EED91184.1	MSDQSVVVKTRKFMKNPLLARRQMIVDIIHPGRANVAKSELQEVVGGMHKTDSKLVVLFGFRTKFGGGKSTGFCVIYDNEDALRKFEPKHRLVRLGLEDKKDRSRKAMKEAKNKGKKTRGTGASVAKHKAKRAANSD	100	3e-86	gi|224002811|ref|XP_002291077.1|	RS24, ribosomal protein 24 40S small ribosomal subunit [Thalassiosira pseudonana CCMP1335]	59.18	3e-40	sp|P14249|RS24_MUCCL	40S ribosomal protein S24 OS=Mucor circinelloides f. lusitanicus GN=RPS24 PE=3 SV=1	100	7e-85	tr|B8C5V1|B8C5V1_THAPS	RS24, ribosomal protein 24 40S small ribosomal subunit OS=Thalassiosira pseudonana GN=RS24 PE=3 SV=1	gi|289596242|ref|YP_003482938.1|	56.6	8e-10	COG2004	Ribosomal protein S24E	J	Translation, ribosomal structure and biogenesis	K02974|1|2e-43|142|olu:OSTLU_42986| small subunit ribosomal protein S24e	GO:0006412//translation	GO:0003735//structural constituent of ribosome;GO:0000166//nucleotide binding	GO:0005840//ribosome
191	EED94578.1	hypothetical protein THAPSDRAFT_268160 [Thalassiosira pseudonana CCMP1335]	31332.1	0.113	1	3	XP_002287135.1	0.79	0.069	4	0.01208	EED94578.1	MCIPCCVCVSTSEVVVVERLGKFDRFINPGLGVIVCPFEKYAGKVSFRVQQLDVKVETKTKDNVFLTTVVSVQYQVIRENVYQAFYSLTNTQQQITAHVYDVMRSQLPTLELDAVFEAKEELALAVKNALSETMSSYGYQILQALITDIDPDIRVKQAMNEINSAKRLKFAVAEKAEGQKILQVKSAEAEAEAKYLSGVGVAKQRKAIVDGLRSSIVDFSDGVKGASSKDVMDLLLLSQYFDCIRDVGHANHCKTTFVPSGHSGGADAGMRNALLVANAAKLS	100	0	gi|223994903|ref|XP_002287135.1|	hypothetical protein THAPSDRAFT_268160 [Thalassiosira pseudonana CCMP1335]	51.7	1e-95	sp|Q9SRH6|HIR3_ARATH	Hypersensitive-induced response protein 3 OS=Arabidopsis thaliana GN=HIR3 PE=1 SV=1	100	0	tr|B8BTC7|B8BTC7_THAPS	Uncharacterized protein OS=Thalassiosira pseudonana GN=THAPSDRAFT_268160 PE=4 SV=1	gi|430742193|ref|YP_007201322.1|	281	7e-93	COG0330	Regulator of protease activity HflC, stomatin/prohibitin superfamily	O	Posttranslational modification, protein turnover, chaperones	-	GO:0010363//regulation of plant-type hypersensitive response;GO:0015706//nitrate transport;GO:0006612//protein targeting to membrane;GO:0043069//negative regulation of programmed cell death;GO:0030968//endoplasmic reticulum unfolded protein response;GO:0010167//response to nitrate;GO:0030003//cellular cation homeostasis;GO:0070838//divalent metal ion transport;GO:0050832//defense response to fung…		GO:0005739//mitochondrion;GO:0009506//plasmodesma;GO:0005774//vacuolar membrane;GO:0005886//plasma membrane
192	EJK75104.1	hypothetical protein THAOC_03185 [Thalassiosira oceanica]	19878.4	0.07	1	1	-	0.67	0.065	4	0.003383	EJK75104.1	MSTFAYRRSFPAKKDRQNQLAHEETLRKIEKLKTDLQEAEAKLADAKRGREDDEEGTRARKMQRRAELKKEIETANAELSKLKQNDPQAIADLEKELKLVKEAADRWTDNIFSCKDYLVKKRGMMKKEANKYLGITDNFDCKLGGVGFGFGAKRLTSTLRLDPDDKALKNLR	100	6e-122	gi|397642229|gb|EJK75104.1|	hypothetical protein THAOC_03185 [Thalassiosira oceanica]	32.65	2e-14	sp|Q8K396|MND1_MOUSE	Meiotic nuclear division protein 1 homolog OS=Mus musculus GN=Mnd1 PE=1 SV=1	100	1e-120	tr|K0TD99|K0TD99_THAOC	Uncharacterized protein OS=Thalassiosira oceanica GN=THAOC_03185 PE=4 SV=1	-	-	-	-	-	-	-	-	-	-	-
193	EED88227.1	t-complex protein 1 zeta subunit [Thalassiosira pseudonana CCMP1335]	60898.7	0.058	3	7	XP_002294393.1	0.81	0.061	4	0.01017	EED88227.1	MSRIQDLNASAEIVSHGAALAVNIAASTGLQSVLKSNLGPRGTLKMLVGGAGQIKLTKDGNVLLHEMQIQHPTAALIARTATAQDEITGDGTTSTVLLCGELLKQAHRYTSEGLHPRVIADGFDIARDATVKFLDDFKVDFSNKDIAQDRELLRCLASTSLKTKLDHDLADKMSDAVVDAIQCIVPEDTTNSPVDLNMVEIMTMQRKMGTDSRFVNGLVLDHGGRHPDMPKVLNNCHIMTCNVTFEYEKTEVQSGFFYSSAEEREKLVESERKWLDERCRQVVDFKRSVCQEGESFVMINQKGIDPLSLDIFAKEGILCLRRAKRRNMERLTLACGGSPIHSVEDLDKDMLGWCGKVSEVTLGDDKFTFVEECRHPKSCTLLLQGPNVHTIDQIKDAVR…	100	0	gi|224010872|ref|XP_002294393.1|	t-complex protein 1 zeta subunit [Thalassiosira pseudonana CCMP1335]	59.51	0	sp|Q3MHL7|TCPZ_BOVIN	T-complex protein 1 subunit zeta OS=Bos taurus GN=CCT6A PE=1 SV=3	100	0	tr|B8CE84|B8CE84_THAPS	T-complex protein 1 zeta subunit OS=Thalassiosira pseudonana GN=THAPSDRAFT_25279 PE=3 SV=1	gi|330507490|ref|YP_004383918.1|	318	2e-100	COG0459	Chaperonin GroEL (HSP60 family)	O	Posttranslational modification, protein turnover, chaperones	K09498|1|0.0|673|csl:COCSUDRAFT_38097| T-complex protein 1 subunit zeta	GO:0006457//protein folding	GO:0051082//unfolded protein binding;GO:0005524//ATP binding	GO:0005737//cytoplasm
194	EED91185.1	biotin synthase, BioB, partial [Thalassiosira pseudonana CCMP1335]	36548.9	0.033	1	1	XP_002291078.1	0.4	0.121	4	0.007704	EED91185.1	MGGVTATVRHDWTKDEIAEVYSLPFHELMYKASTVHRMYWDPSEVQQCTLLSIKTGGCTEDCSYCSQSTRHKTFVKPTPTMKVQEVLEAAKRAKDAGSTRFCMGAAWRELGNKKNAFNHILDMVKGVNGMGLEVCCTLGMLNAEQARQLKEAGLTAYNHNLDTSPEHYPNVITTRTYEDRLETIANVREAGISVCCGGILGLGEKEADRVGLLHVLATLPEHPESVPINALVAVEGTPLGNAAADEDSKADGIADVDAFDMARMIATARIVMPRTMVRLSAGRLSFSDAEQFLMFQAGANSIFNGDKLLTTDNPEFDQDMALFDKLGFVG	100	0	gi|224002813|ref|XP_002291078.1|	biotin synthase, BioB [Thalassiosira pseudonana CCMP1335]	61.99	4e-144	sp|P54967|BIOB_ARATH	Biotin synthase OS=Arabidopsis thaliana GN=BIO2 PE=2 SV=1	100	0	tr|B8C5V3|B8C5V3_THAPS	Biotin synthase, BioB (Fragment) OS=Thalassiosira pseudonana GN=THAPSDRAFT_34585 PE=3 SV=1	gi|375146944|ref|YP_005009385.1|	417	1e-145	COG0502	Biotin synthase or related enzyme	H	Coenzyme transport and metabolism	K01012|1|7e-151|432|ccp:CHC_T00009361001| biotin synthase [EC:2.8.1.6]	GO:0009102//biotin biosynthetic process	GO:0004076//biotin synthase activity;GO:0051536//iron-sulfur cluster binding;GO:0005506//iron ion binding	-
195	EED91899.1	predicted protein [Thalassiosira pseudonana CCMP1335]	41839.3	0.026	1	1	XP_002290147.1	0.83	0.073	4	0.02408	EED91899.1	MKTKVALVGLPNTGKSTLFNAIAQQSIAESANYPFCTIEPNTTPIPIPDDNLPKLATLANSKKALNAKIFLVDVAGLVKGASRGEGLGNRFLATVRECDLIIHVVRSYIDEDVIHVDGKVDPVADAEVVNMELLLADLAHVQRRLERSTCMGDERGVLLKVEKGLKEGFPARSIGLSPEEALTIKSMGLLTLKPVVYAFNVDEVDFTMNKQEALRAAEECMRQIQYCDLKTDAFTVVSAKLECELGLLGLEDRNAYMESISIDDSAPSSGYVEQLSYHTLPLLVKDVLGLSLVYTGPAVPPERSQTTKAHLISSSGATASDLAGKLHGEIQKGFICADVTNVTELVQYESYNAEWSCENGRQTIRSDGWRCHLREVELD	100	0	gi|224000950|ref|XP_002290147.1|	predicted protein [Thalassiosira pseudonana CCMP1335]	35.88	3e-58	sp|P37518|YCHF_BACSU	Ribosome-binding ATPase YchF OS=Bacillus subtilis (strain 168) GN=ychF PE=2 SV=1	100	0	tr|B8C278|B8C278_THAPS	Uncharacterized protein OS=Thalassiosira pseudonana GN=THAPSDRAFT_454 PE=4 SV=1	gi|16330542|ref|NP_441270.1|	263	8e-84	COG0012	Ribosome-binding ATPase YchF, GTP1/OBG family	J	Translation, ribosomal structure and biogenesis	K19788|1|7e-66|218|pda:103709826| obg-like ATPase 1		GO:0005525//GTP binding	GO:0009507//chloroplast
196	EJK58753.1	hypothetical protein THAOC_21096 [Thalassiosira oceanica]	24025.1	0.07	2	6	-	0.74	0.064	4	0.005822	EJK58753.1	MTRPEGSSKGSPAPGQAHVSAAPTAIQSHEFPNLSSSEGSRKYLIGGNWKSNGTIASVEKIVADFNGAGPIPANAEVVIGCPYIHIPLLLSTLRSDIEVAAQNCSLTGMGAYTGEITASQLKDLGVNWVILGHSERREGFGMAGEDSELVAKKTKMALSEGLKVMLCIGEKKEEREAGTTMDVCAEQLKPAAAMLSKEDWANVSIAYEPVWAIGTGLTGASETIVLI	100	3e-166	gi|397604702|gb|EJK58753.1|	hypothetical protein THAOC_21096 [Thalassiosira oceanica]	52.38	3e-59	sp|P46225|TPIC_SECCE	Triosephosphate isomerase, chloroplastic OS=Secale cereale PE=1 SV=1	100	7e-165	tr|K0RYC4|K0RYC4_THAOC	Triosephosphate isomerase OS=Thalassiosira oceanica GN=THAOC_21096 PE=3 SV=1	gi|317132501|ref|YP_004091815.1|	152	6e-44	COG0149	Triosephosphate isomerase	G	Carbohydrate transport and metabolism	K01803|1|8e-61|194|csl:COCSUDRAFT_30774| triosephosphate isomerase (TIM) [EC:5.3.1.1]	GO:0050896//response to stimulus;GO:0008152//metabolic process	GO:0004807//triose-phosphate isomerase activity	GO:0009536//plastid
197	AIR75899.1	chaperonin GroEL (chloroplast) [Roundia cardiophora]	57332.7	0.169	1	1	YP_009093226.1;AIR76172.1;YP_009093499.1	0.62	0.17	4	0.03624	AIR75899.1	MTKKILYQDNARRALERGMEIMVEAVSVTLGPKGRNVVLEKTYGSPQIINDGVTIAKEINLEDHIENTGVSLIRQAAAKTNDVAGDGTTTATVLAYAMVKEGLKNVAAGANPISIKLGMEKATQYLVMQINEFAQPVEDIQSIKQVAAISAGNDEVIGALIADALAKVGKEGVISLEEGKGIITELEITEGMKLEKGFISPYFITDTEKMEVSYENPYILLTDKRITLVQQDLLPILEQITKTKRPLLIIAEDVEKEALATLILNKLRGIVNVVAVRAPGFGELRKLMLQDIAVLTGGTVITQDAGLSLENIQLNLLGQARRIIVSKDTTTIVGDGLEIENINARCEQLRKQVNIADTGYEKEKLQDRIAKLSGGIAVIRVGAVTETEMKDKKLRLEDA…	100	0	gi|700658221|ref|YP_009093226.1|	chaperonin GroEL (chloroplast) [Roundia cardiophora]	95.45	0	sp|A0T0X0|CH60_THAPS	60 kDa chaperonin, chloroplastic OS=Thalassiosira pseudonana GN=groL PE=3 SV=1	100	0	tr|A0A089X888|A0A089X888_9STRA	60 kDa chaperonin, chloroplastic OS=Roundia cardiophora GN=groL PE=3 SV=1	gi|307150334|ref|YP_003885718.1|	772	0	COG0459	Chaperonin GroEL (HSP60 family)	O	Posttranslational modification, protein turnover, chaperones	K04077|1|0.0|540|cam:101512130| chaperonin GroEL	GO:0042026//protein refolding	GO:0005524//ATP binding;GO:0051082//unfolded protein binding	GO:0009507//chloroplast
198	EJK64946.1	hypothetical protein THAOC_14264, partial [Thalassiosira oceanica]	12399.3	0.075	1	1	-	0.51	0.015	4	2.415e-05	EJK64946.1	AAAAPPQGPPEAPTYLAATYNAGQGALTLNYKRAVTPGRVTVGAMLECSPVTLESQAAVGAEFSLTRSKMNVCVDSSGRIQSVLESKLGREPGGPALSFAAELDHGKNVMKFGYGLNIGS	100	1e-73	gi|397618556|gb|EJK64946.1|	hypothetical protein THAOC_14264, partial [Thalassiosira oceanica]	29.59	4e-07	sp|Q9LHE5|TO401_ARATH	Mitochondrial import receptor subunit TOM40-1 OS=Arabidopsis thaliana GN=TOM40-1 PE=1 SV=3	100	3e-72	tr|K0SVA5|K0SVA5_THAOC	Uncharacterized protein (Fragment) OS=Thalassiosira oceanica GN=THAOC_14264 PE=4 SV=1	-	-	-	-	-	-	-	K11518|1|4e-08|53.5|gsl:Gasu_23460| mitochondrial import receptor subunit TOM40	GO:0055085//transmembrane transport;GO:0044070//regulation of anion transport	GO:0008308//voltage-gated anion channel activity	GO:0005741//mitochondrial outer membrane
199	EED94363.1	ABC transporter [Thalassiosira pseudonana CCMP1335]	74032.9	0.054	3	3	XP_002288927.1	0.76	0.112	4	0.03087	EED94363.1	MAIISKLASKAAIVSLVASSSFYNDNVSTAFAPSVASIANRPSLYPPLIPSVRTTMSTSQLHAKKKKGNTPRPNPNYGKQQKQEKASVKEAKFDAATRQFQFTLVGLTKTLPDKSKDILKNINLSFYPGAKIGVVGLNGSGKSTLLKIMAGVEKEFDGTARPLPGSSIGYLPQEPRLEYETVKECIDSAVASSRAILDTYNELSLSMADPNLTDEEMTSAMNQLEAIGDKIEAENLWELDRMVERSLTLHWFGIYYFRAMDSLRVPPGDAKTAVLSGGEKRRVSLCQLLLESHDMLLLDEPTNHLDAESIAWLEQFLDQFKGTVVCITHDRYFLENVAQWILELDRGQGIPFEGNYSQWLEAKNNRLEGEKKSQTAAAKAVAAELEWVRSNPKAKGTKS…	100	0	gi|223998508|ref|XP_002288927.1|	ABC transporter [Thalassiosira pseudonana CCMP1335]	55.61	0	sp|P45127|ETTA_HAEIN	Energy-dependent translational throttle protein EttA OS=Haemophilus influenzae (strain ATCC 51907 / DSM 11121 / KW20 / Rd) GN=ettA PE=1 SV=1	100	0	tr|B8BYF0|B8BYF0_THAPS	ABC transporter OS=Thalassiosira pseudonana GN=THAPSDRAFT_21858 PE=4 SV=1	gi|325109085|ref|YP_004270153.1|	654	0	COG0488	ATPase components of ABC transporters with duplicated ATPase domains	R	General function prediction only	K06185|1|3e-47|179|vcn:VOLCADRAFT_93958| ATP-binding cassette, subfamily F, member 2!K06158|5|2e-45|176|gsl:Gasu_15030| ATP-binding cassette, subfamily F, member 3	GO:0006200//ATP catabolic process	GO:0005524//ATP binding;GO:0016887//ATPase activity	-
200	EJK59308.1	hypothetical protein THAOC_20495 [Thalassiosira oceanica]	42212.3	0.055	1	2	-	0.68	0.172	4	0.04911	EJK59308.1	MLDMGFEPQIRSIMEKVPDSSKRQTLLFSATWPKVIQKLAFDFLADPVQINVGEINVLNANKDITQNIVMCSDGDKIDKLKEILTNLVNSADDVEEKPKPAGGRSTQKPVDLGGKKHSKVIVFVAKKYVAHELANQLWDEGFAVDSLHGDRAQWERTKVINAFKQGTLRMLIATDVAARGLDVKDVGVVVNYDMPVGTNGAEDYIHRIGRTGRAGAKGIAYTFFTPGDKKLATELVEILTKADQQIPDELKAMARPKRTCLVVVAVEVEEAEEGVVGVGVGKSNQLGQYAPLSSPLFLVAHGFSHLQLARRAVVAVLFSYPLHLHLKGALPAVPPPLRPDRRFAETLQAGDKRMSSTANLRREQKIWPRGAKRDSIHCRGLC	100	0	gi|397606414|gb|EJK59308.1|	hypothetical protein THAOC_20495 [Thalassiosira oceanica]	46.85	4e-67	sp|Q9LYJ9|RH46_ARATH	DEAD-box ATP-dependent RNA helicase 46 OS=Arabidopsis thaliana GN=RH46 PE=2 SV=2	100	0	tr|K0RZQ8|K0RZQ8_THAOC	Uncharacterized protein OS=Thalassiosira oceanica GN=THAOC_20495 PE=4 SV=1	gi|297538309|ref|YP_003674078.1|	177	2e-49	COG0513	Superfamily II DNA and RNA helicase	L	Replication, recombination and repair	K12823|1|3e-67|226|crb:CARUB_v10000450mg| ATP-dependent RNA helicase DDX5/DBP2 [EC:3.6.4.13]	GO:0042545//cell wall modification;GO:0009664//plant-type cell wall organization	GO:0008026//ATP-dependent helicase activity;GO:0003676//nucleic acid binding;GO:0005524//ATP binding	-
201	EJK76686.1	hypothetical protein THAOC_01538, partial [Thalassiosira oceanica]	96617.6	0.009	1	2	-	0.72	0.109	4	0.02167	EJK76686.1	VRNANTKARKGRLRKLLRFALRLASRSRLALRLASRLALRLAHSSVREDKGVVVQLELSPLGQSPKGDDRRIVIGLPLGPGVSGGKVRLSARLGREEVVVDLGRLAPFVGHAERRDAVHERRGLLDGGFRLLDVGSRGHGSRLGKLDVGHDHLAGNVLHAVGDEVIAEGIRVVRVLAGGGEGLHGLDELHVLDGLQWGRSLPRNEPDGGDVHYPVPAEHIQRLEPVAADVGVLGRRLLFVAAALADDEEDVVEVREQLIVVALHLIRGALAVGDSVPLVVAVLFVDRDDKRPDLMGDDVAARDGRDLIVQGARRGGPAAEPLQGRANRALRVGEPPGRRCVIQHAVEKGPLVEAVVLAGGGVPARVLTAARAADEQLPARLKTRVASNLGRARFGEHVV…	100	0	gi|397645088|gb|EJK76686.1|	hypothetical protein THAOC_01538, partial [Thalassiosira oceanica]	-	-	-	-	100	0	tr|K0TN04|K0TN04_THAOC	Uncharacterized protein (Fragment) OS=Thalassiosira oceanica GN=THAOC_01538 PE=4 SV=1	-	-	-	-	-	-	-	-	-	-	-
202	EED94963.1	RL19, ribosomal protein 19 60S large ribosomal subunit [Thalassiosira pseudonana CCMP1335]	21300.1	0.092	1	1	XP_002287520.1;EJK50163.1	0.73	0.124	4	0.03159	EED94963.1	MVSLKLQKRLAASVLKCGKRKIWLDPNEINEISLANSRRNIARLEKDGLIMKKPAVVHSRSRVNARLEAKRKGRHTGIGKRRGTANARLPFKVIWMRRIRVLRRLLHKMRDAKKIDKHIYHTLYLHAKGNQFKNKRVLLETIHTMKAEKAQTKALADQAEAKKSRARARVARRAAKEAKGKEDQ	100	2e-111	gi|223995693|ref|XP_002287520.1|	RL19, ribosomal protein 19 60S large ribosomal subunit [Thalassiosira pseudonana CCMP1335]	70.89	1e-76	sp|P36241|RL19_DROME	60S ribosomal protein L19 OS=Drosophila melanogaster GN=RpL19 PE=1 SV=2	100	6e-110	tr|B8BVM9|B8BVM9_THAPS	Ribosomal protein L19 OS=Thalassiosira pseudonana GN=RL19 PE=3 SV=1	gi|57641458|ref|YP_183936.1|	134	1e-38	COG2147	Ribosomal protein L19E	J	Translation, ribosomal structure and biogenesis	K02885|1|3e-76|230|crb:CARUB_v10014622mg| large subunit ribosomal protein L19e	GO:0006412//translation	GO:0003735//structural constituent of ribosome	GO:0005840//ribosome;GO:0005739//mitochondrion
203	EED89228.1	predicted protein [Thalassiosira pseudonana CCMP1335]	115554	0.017	1	1	XP_002293492.1	0.57	0.129	4	0.01442	EED89228.1	MAAAAANHSHRAGKLKQQNKKNKRSNASKRSNARKAGGKIQASSASGSGRKSVKVNEGGSAKANRVNAAKIKRDAAKKTLLSARRGMLLSGVVNGTAATAVVGNNSAVMSSLGGMSMATLKAMTQPAPRVVGIISLSENEEGLEEMVRGILMGGADKSVVVGGGSGGGMKSVTVSYGAHQKSSTSGNLTILTNTTSFYSQYSSSYTEEDASIQSALDLCRICDLVLFLVDGSSVTSLDSIVSGGGGVGGGGSTVGGASVASRGGFGGGGASVATSIKTSANTAHLDHVISDRGDRILTAIKGQGLPTPVTLVVHKDGEGGGVGGSVMGMGVVGMSDGINLNEDNDNVEEDEDVTMSLGQSQHTSKSTKSIRRTYLRRRAELKRYVGRLAVTEFGVDCGK…	100	0	gi|224009067|ref|XP_002293492.1|	predicted protein [Thalassiosira pseudonana CCMP1335]	32.37	4e-79	sp|Q5SWD9|TSR1_MOUSE	Pre-rRNA-processing protein TSR1 homolog OS=Mus musculus GN=Tsr1 PE=1 SV=1	100	0	tr|B8CAZ6|B8CAZ6_THAPS	Uncharacterized protein OS=Thalassiosira pseudonana GN=THAPSDRAFT_24590 PE=4 SV=1	-	-	-	-	-	-	-	K14799|1|1e-89|308|osa:4350322| pre-rRNA-processing protein TSR1	-	-	-
204	EED96472.1	26S proteasome ATPase regulatory subunit 4 [Thalassiosira pseudonana CCMP1335]	49612.9	0.075	3	4	XP_002286831.1	0.78	0.106	4	0.03432	EED96472.1	MGGEGGPPGDNNKDKEDPDKKKKKRFEPRPRTTGARRRKRRQGPSGIQRIPTVLPASKCKLRMMKLERIKDFLLMEQEFIRNHEVFKPREERDQEEREKLEELRGSPMGVGSLEELIDDNHAIVSSSMGPEYYVNILSSVNQDLLEPGSAVLLHNKTMSVVGILEDDADPMVSVMKVEKAPLESYADIGGLEDQIQEIKEAVELPLAHPELYEDIGIKPPKGVILYGEPGTGKTLLAKAVANHTSATFLRVVGSELIQKYLGDGPKLVRELFRVADDLSPTIVFIDEIDAVGSKRYDSSSGGTKEIQRTMLELLNQLDGFDERGDVKVIMATNKIESLDPALIRPGRIDRKIEFPFPDTKTKRHIFNIHTSKMTLGEDVDLEKFIMSKDELSGADIKAI…	100	0	gi|223994295|ref|XP_002286831.1|	26S proteasome ATPase regulatory subunit 4 [Thalassiosira pseudonana CCMP1335]	79	0	sp|Q9SL67|PRS4B_ARATH	26S proteasome regulatory subunit 4 homolog B OS=Arabidopsis thaliana GN=RPT2B PE=1 SV=1	100	0	tr|B8BR56|B8BR56_THAPS	26S proteasome ATPase regulatory subunit 4 OS=Thalassiosira pseudonana GN=RPT2 PE=3 SV=1	gi|11499558|ref|NP_070800.1|	386	2e-130	COG1222	ATP-dependent 26S proteasome regulatory subunit	O	Posttranslational modification, protein turnover, chaperones	K03062|1|0.0|641|thj:104804026| 26S proteasome regulatory subunit T2	GO:0051788//response to misfolded protein;GO:0009853//photorespiration;GO:0006094//gluconeogenesis;GO:0006635//fatty acid beta-oxidation;GO:0035266//meristem growth;GO:0043161//proteasome-mediated ubiquitin-dependent protein catabolic process;GO:0010078//maintenance of root meristem identity;GO:0009651//response to salt stress;GO:0009407//toxin catabolic process;GO:0090351//seedling development;G…	GO:0008233//peptidase activity;GO:0016887//ATPase activity;GO:0005524//ATP binding	GO:0005829//cytosol;GO:0008540//proteasome regulatory particle, base subcomplex;GO:0005886//plasma membrane;GO:0005634//nucleus
205	XP_002295760.1	predicted protein [Thalassiosira pseudonana CCMP1335]	26883.4	0.028	1	1	ACI64477.1	0.65	0.158	4	0.0367	XP_002295760.1	MSFLRPLSTLFRAGTRPTVSASTSITTSGVINGSPSALLLPTHRSKHSATQVKRLFKKNPARLRIQRRNEQQLAATEGDASTTNTSRSSSSNNATTKIPQRSYPPVFKPTFLQNGWSAPPPADVEVPVYPFRVRRTGRKPFGSAGFLPVYRDVRIHGTKHTTIIRNVQGDISAFLTELRAVLALPLPKKGILTSMSNINVSSPKHGGGEAGRGVNAENPIRLRAGNTIEVNGDWSREVKRWLAGLGF	100	2e-164	gi|224004218|ref|XP_002295760.1|	predicted protein [Thalassiosira pseudonana CCMP1335]	-	-	-	-	100	5e-163	tr|B5YMK6|B5YMK6_THAPS	Predicted protein OS=Thalassiosira pseudonana GN=THAPS_23405 PE=4 SV=1	-	-	-	-	-	-	-	-	GO:0006412//translation	GO:0003735//structural constituent of ribosome	GO:0005840//ribosome
206	XP_002292359.1	adenosuccinate synthase [Thalassiosira pseudonana CCMP1335]	46415.4	0.041	1	3	EED90334.1	0.76	0.092	4	0.01913	XP_002292359.1	MLSQEYDVCARVAGGSNAGHTIVVEGKKYKFHLLPSGVLNEKATCVIGNGVVIHLPSFLNELEGLTASGINAEGRILLSDRAHLVFDFHQEADGYSEKKLGRNKIGTTKKGIGPAYASKISRNGIRIGDLKNFDFFEMRFRELAESMMRSYPGLEIDVEGQLDYYRSISERVCAMTTDTIEYTNEAYDMGKKILIEGANATMLDIDFGTYPYVTSSNPSIGSVLTGLGVSPKKIHGIYGTTKAYCTRVGEGPFPTELDRDVPGSIGEHLGVVGAEWGTTTGRSRRVGWLDIPQMKYSTLINGFTAINLTKLDVLTGLAEIKIGRAYKHNGKIINTMPSCLKTMSEIEVIYETLPGWSEDISKARNFEDLPVNAQRYVLRVQELLGVPIRWIGCGANRLD…	100	0	gi|224006798|ref|XP_002292359.1|	adenosuccinate synthase [Thalassiosira pseudonana CCMP1335]	72.99	0	sp|B7FUM7|PURA_PHATC	Adenylosuccinate synthetase OS=Phaeodactylum tricornutum (strain CCAP 1055/1) GN=PHATRDRAFT_26256 PE=3 SV=1	100	0	tr|B8C8Q6|B8C8Q6_THAPS	Adenylosuccinate synthetase OS=Thalassiosira pseudonana GN=PURA PE=3 SV=1	gi|269123114|ref|YP_003305691.1|	378	3e-127	COG0104	Adenylosuccinate synthase	F	Nucleotide transport and metabolism	K01939|1|6e-167|480|csl:COCSUDRAFT_47829| adenylosuccinate synthase [EC:6.3.4.4]	GO:0044208//'de novo' AMP biosynthetic process	GO:0004019//adenylosuccinate synthase activity;GO:0000287//magnesium ion binding;GO:0005525//GTP binding	GO:0009536//plastid
207	EED91043.1	predicted protein [Thalassiosira pseudonana CCMP1335]	43937.8	0.02	1	2	XP_002290936.1	0.41	0.022	4	6.138e-05	EED91043.1	MQTDDVDTSKLYETLEVEKTATQKEIRKAYMKLSRTHHPDKGGDEHKFKEISAAYEILSDENKRKQYDKYGLEGVRGDDVGAAGGEDLFSMFFGGGRSGRSAGPRKGPSVNHPLKVSLEDLYNGKTVKLAVNRKIIEGTPVECSECKGQGAVMEVRQLGPGMITQTQRPCDKCKGVGQKCDFKSERKVLEVHVEKGMMHNDKITFREMADEVPKMQTGDINFIIQEKDHDLFKRKGADLLAVKEVSLNQALCGVTWKIKHLDGRVLVIKSRPGEVIKPEQNTKDALPFVKVLPDEGMPSKGNPFVRGNMYVMFRVKFPEDNELPESVIEQLKQLLPEPDEPEEYDPMDEGVEEVHLNQGDLKSFGKGGAAMSSEAHDSDDEEGGPVQCQQS	100	0	gi|224002529|ref|XP_002290936.1|	predicted protein [Thalassiosira pseudonana CCMP1335]	42.58	3e-85	sp|P42825|DNAJ2_ARATH	Chaperone protein dnaJ 2 OS=Arabidopsis thaliana GN=ATJ2 PE=1 SV=2	100	0	tr|B8C522|B8C522_THAPS	Uncharacterized protein OS=Thalassiosira pseudonana GN=THAPSDRAFT_40894 PE=4 SV=1	gi|169824476|ref|YP_001692087.1|	142	8e-37	COG0484	DnaJ-class molecular chaperone with C-terminal Zn finger domain	O	Posttranslational modification, protein turnover, chaperones	K09503|1|4e-95|293|spen:107004927| DnaJ homolog subfamily A member 2	GO:0006457//protein folding	GO:0046872//metal ion binding;GO:0031072//heat shock protein binding;GO:0051082//unfolded protein binding	-
208	AIR75573.1	cytochrome f (chloroplast) [Cyclotella sp. WC03_2]	34260.9	0.277	3	5	-	0.46	0.124	4	0.008632	AIR75573.1	MATNKFFKSLLFTLTIAISSFGFCVENSFAYPVFAQQGYSNPRAANGKLACANCHLNQKAIEIEAPQGVLPNSVFEIEIKVPYDTTRQQISADGKPADLNVGGILILPKGFKLASKNQISAEVKAKNKGVFISPYSTEFDNILVVGPIAGKTHQELIFPVVAPDPESNPDVKYLTYPFYAGGNRGRGQVYPTGEKSNINSFGAIQAGQITEILTTEKGESKITIVNSDGTATSQTLSAGLKLLVKQGDIVKQDQPLNIDPNVGGFGQEDSEIVLQSSSRILGYLIFCLCLLLTQVLLILKKKQYEKVQAAELNF	100	0	gi|691190060|gb|AIR75573.1|	cytochrome f (chloroplast) [Cyclotella sp. WC03_2]	94.9	0	sp|A0T0R9|CYF_THAPS	Cytochrome f OS=Thalassiosira pseudonana GN=petA PE=3 SV=1	100	0	tr|A0A089VNN2|A0A089VNN2_9STRA	Cytochrome f OS=Cyclotella sp. WC03_2 GN=petA PE=3 SV=1	gi|434384396|ref|YP_007095007.1|	291	4e-96	COG3258	Cytochrome c	C	Energy production and conversion	K02634|1|2e-102|306|ccp:CHC_735| apocytochrome f	GO:0015979//photosynthesis;GO:0022900//electron transport chain	GO:0009055//electron carrier activity;GO:0005506//iron ion binding;GO:0020037//heme binding	GO:0031361//integral component of thylakoid membrane;GO:0009535//chloroplast thylakoid membrane
209	XP_002294336.1	histidyl tRNA synthetase [Thalassiosira pseudonana CCMP1335]	52561.8	0.131	2	2	EED88170.1	0.7	0.058	4	0.003314	XP_002294336.1	MQRRPKVAKGTRDYLPEQMSIRDKAFTIIRRVFKRHGAVEIDTPVFELKETLTGKYGEDSKLIYDLADQGGELLALRYDLTVPFARFLAVNAVGNIKRFHIGKVYRRDQPALSRGRYREFYQCDFDIAGVYGRMVPDSECLAVACEILDSLPIGDFGIKLNHRRLLDAILDLCGVPADKFRTICSAVDKLDKEPWSEVRREMVEDKGLTGDVADRIGEFVVLKGKPWDLYKSLMDEKKFGNHKGAMAAMEDMRILFEYLEAMDKLKFISFDLSLARGLDYYTGVIYEAVCMNGNTQVGSIGGGGRYDNLVSMFQEAGKVTPCVGVSVGIERVFTLMEERLRQEQGGSIKQPNVSVLVASAGENLMQERMKLTNILWDANISAEFSQQDNPKLKFEIANA…	100	0	gi|224010758|ref|XP_002294336.1|	histidyl tRNA synthetase [Thalassiosira pseudonana CCMP1335]	55.97	2e-175	sp|Q61035|SYHC_MOUSE	Histidine--tRNA ligase, cytoplasmic OS=Mus musculus GN=Hars PE=1 SV=2	100	0	tr|B8CDX2|B8CDX2_THAPS	Histidyl tRNA synthetase OS=Thalassiosira pseudonana GN=THAPSDRAFT_42621 PE=4 SV=1	gi|269836508|ref|YP_003318736.1|	280	4e-88	COG0124	Histidyl-tRNA synthetase	J	Translation, ribosomal structure and biogenesis	K01892|1|2e-179|514|cvr:CHLNCDRAFT_36479| histidyl-tRNA synthetase [EC:6.1.1.21]	GO:0006427//histidyl-tRNA aminoacylation	GO:0005524//ATP binding;GO:0016841//ammonia-lyase activity;GO:0004821//histidine-tRNA ligase activity	GO:0005737//cytoplasm
210	XP_002291118.1	HSP90 family member [Thalassiosira pseudonana CCMP1335]	80628.8	0.136	1	4	EED91225.1	0.49	0.086	4	0.003382	XP_002291118.1	MTDSQESYAFSADINQLLSLIINTFYSNKEIFLRELISNSSDALDKIRYQSLTDSSVLDAEPELQIKLIPDKANNTLSIEDTGIGMTKADLVNNLGTIAKSGTKAFMEALTAGADISMIGQFGVGFYSAYLVADKVEVISKNNDDECYTWASEAGGSFTITKTPEDACLKRGTRIILHLKEDMSEYLEERRIKDLVKTHSEFIGFPIMLYTEKTTEKEVTDDDDDDEDEGDDDKPKVEEVDEEEAKKEKKTKKIKEVTHEWEHLNNMKPLWMRKPEDVTQDEYAAFYKSISNDWEEHAAVKHFSVEGQLEFKAVLFCPKRAPFDMFEGGAKKKHNHIKLYVRRVFIMDNCEDLMPEWLSFIKGVVDSEDLPLNISRETLQQNKILRVIKKNLVKKCIEM…	100	0	gi|224002893|ref|XP_002291118.1|	HSP90 family member [Thalassiosira pseudonana CCMP1335]	72.65	0	sp|P36181|HSP80_SOLLC	Heat shock cognate protein 80 OS=Solanum lycopersicum GN=HSC80 PE=2 SV=1	100	0	tr|B8C637|B8C637_THAPS	HSP90 family member OS=Thalassiosira pseudonana GN=HSP90_1 PE=3 SV=1	gi|108760025|ref|YP_634186.1|	563	0	COG0326	Molecular chaperone, HSP90 family	O	Posttranslational modification, protein turnover, chaperones	K04079|1|0.0|932|brp:103851857| molecular chaperone HtpG	GO:0006457//protein folding;GO:0006950//response to stress	GO:0051082//unfolded protein binding;GO:0005524//ATP binding	GO:0005737//cytoplasm
211	EED89674.1	RL35, ribosomal protein 35 60S large ribosomal subunit [Thalassiosira pseudonana CCMP1335]	13782.9	0.083	1	2	XP_002293213.1;EJK70954.1	0.46	0.124	4	0.009571	EED89674.1	MVKAYELRGLPKEELVKTLNELRKELSELHVAKVTGGAASKIAKIKSVRKSIARVLTVHNQQQKEGIRKASAGSKYISKDLRMKKTRAIRRALTKEQKGKKTLKQQKKDTHFPMRRYAVKA	100	2e-66	gi|224008508|ref|XP_002293213.1|	RL35, ribosomal protein 35 60S large ribosomal subunit [Thalassiosira pseudonana CCMP1335]	63.33	1e-35	sp|P17078|RL35_RAT	60S ribosomal protein L35 OS=Rattus norvegicus GN=Rpl35 PE=1 SV=3	100	4e-65	tr|B8CAG2|B8CAG2_THAPS	RL35, ribosomal protein 35 60S large ribosomal subunit OS=Thalassiosira pseudonana GN=RL35 PE=3 SV=1	gi|305662598|ref|YP_003858886.1|	53.5	5e-09	COG0255	Ribosomal protein L29	J	Translation, ribosomal structure and biogenesis	K02918|1|7e-37|125|gsl:Gasu_07620| large subunit ribosomal protein L35e	GO:0006412//translation	GO:0003735//structural constituent of ribosome	GO:0005840//ribosome
212	EJK61308.1	hypothetical protein THAOC_18233 [Thalassiosira oceanica]	16152.7	0.252	2	9	-	0.31	0.139	4	0.01381	EJK61308.1	MPEVQSVQVFGKKKTATACAFAKQGRGLIKVNGQPIELIEPECLRLKAFEPVLILGQDKFANLDIRIRVKGGGMTAQMYAIRSAIAKSIVAYYAKYVDESAKNELRATLLAYDRNLLVADPRRREPKKYGGRSARARFQKSYR	100	4e-90	gi|397611399|gb|EJK61308.1|	hypothetical protein THAOC_18233 [Thalassiosira oceanica]	66.9	8e-62	sp|O22647|RS16_FRIAG	40S ribosomal protein S16 OS=Fritillaria agrestis GN=RPS16 PE=2 SV=1	100	9e-89	tr|K0S5F2|K0S5F2_THAOC	Uncharacterized protein OS=Thalassiosira oceanica GN=THAOC_18233 PE=3 SV=1	gi|397772874|ref|YP_006540420.1|	136	1e-40	COG0103	Ribosomal protein S9	J	Translation, ribosomal structure and biogenesis	K02960|1|2e-64|196|mpp:MICPUCDRAFT_62402| small subunit ribosomal protein S16e	GO:0006412//translation	GO:0003735//structural constituent of ribosome	GO:0005840//ribosome
213	XP_002286627.1	lysophosphatidic acid acyltransferase-like protein, partial [Thalassiosira pseudonana CCMP1335]	16864.9	0.107	1	1	EED96268.1	0.76	0.046	4	0.002743	XP_002286627.1	HHVERFTAKICTRLFICTDVEIRGMQNLPPDDGSAPAPVYVANHASQVDLAVVYFLSRRFKWISKDSVRYLPGVGLIMSLSQHVFIVRTGKNRKSVSNLYQQSDKAIQSGLPMFFFPQGTRRIAVRLPFKDGAFKVALENESQLVPVSI	100	3e-108	gi|223993887|ref|XP_002286627.1|	lysophosphatidic acid acyltransferase-like protein [Thalassiosira pseudonana CCMP1335]	38.67	1e-20	sp|A8J0J0|LPAT_CHLRE	1-acyl-sn-glycerol-3-phosphate acyltransferase CHLREDRAFT_174358 OS=Chlamydomonas reinhardtii GN=CHLREDRAFT_174358 PE=3 SV=2	100	7e-107	tr|B8BPY3|B8BPY3_THAPS	Lysophosphatidic acid acyltransferase-like protein (Fragment) OS=Thalassiosira pseudonana GN=THAPSDRAFT_260812 PE=4 SV=1	gi|383455947|ref|YP_005369936.1|	85.9	2e-19	COG0204	1-acyl-sn-glycerol-3-phosphate acyltransferase	I	Lipid transport and metabolism	K00655|1|4e-22|94.7|vcn:VOLCADRAFT_105609| 1-acyl-sn-glycerol-3-phosphate acyltransferase [EC:2.3.1.51]	GO:0008152//metabolic process	GO:0003841//1-acylglycerol-3-phosphate O-acyltransferase activity	-
214	EED93172.1	RS20, ribosomal protein 20 40S small ribosomal subunit, partial [Thalassiosira pseudonana CCMP1335]	13743.4	0.161	2	7	XP_002289635.1	0.6	0.042	4	0.0006953	EED93172.1	MSSYVPPGKKEAGLEADAGAQVHRIRITLTSRNVKNLEKVCADLKKGALDKKLNVSGPVRMPTKKLKITTRKAPSGEGTNTWDRFEMRIHKRLIDLHAPSDVVKQITSISIEPGVEVDVTINDR	100	2e-76	gi|223999925|ref|XP_002289635.1|	RS20, ribosomal protein 20 40S small ribosomal subunit [Thalassiosira pseudonana CCMP1335]	71.9	1e-49	sp|Q9STY6|RS202_ARATH	40S ribosomal protein S20-2 OS=Arabidopsis thaliana GN=RPS20B PE=2 SV=1	100	5e-75	tr|B8C138|B8C138_THAPS	RS20, ribosomal protein 20 40S small ribosomal subunit (Fragment) OS=Thalassiosira pseudonana GN=RS20 PE=3 SV=1	gi|530780468|ref|YP_008432275.1|	93.2	3e-24	COG0051	Ribosomal protein S10	J	Translation, ribosomal structure and biogenesis	K02969|1|2e-55|172|cre:CHLREDRAFT_195592| small subunit ribosomal protein S20e	GO:0006412//translation	GO:0003735//structural constituent of ribosome;GO:0003723//RNA binding	GO:0005730//nucleolus;GO:0005618//cell wall;GO:0022627//cytosolic small ribosomal subunit;GO:0016020//membrane
215	EJK75726.1	hypothetical protein THAOC_02542 [Thalassiosira oceanica]	40676.6	0.05	1	3	-	0.54	0.17	4	0.0241	EJK75726.1	MADAGTIEAAVSQEEVDKAKEEIEAADPGGEDEAKTEFEVTAEEVSILRAELACEFPDDYKYLSDAYIKSVASKPYSKDPTVRRPLDYTQEKLQNVMEWRAQVRSSRVNRVSVSTKRVRTASQLRSFVQAGAPEMEELVVLANGPANSKEATEDPDRYAKAKALVTSLNNGSLYWHGFTKEGKPILWIRCGRKPWYPNVEAEVNALILIADAGIKCMPEGVTDFVVLSDSNSPPPPVPSFMINVLKALVKGYPDRLNVLLSAPVGSIIQFVMNLLLPLMPGRLADKFLLKDLEQSTPILKEWLMHGEDDIPTFFGGKSNHDELYPDEYYSKNQGEGCLKFDYFGMIERLKTSAKEWEEAQKK	100	0	gi|397643223|gb|EJK75726.1|	hypothetical protein THAOC_02542 [Thalassiosira oceanica]	-	-	-	-	100	0	tr|K0TLZ2|K0TLZ2_THAOC	Uncharacterized protein OS=Thalassiosira oceanica GN=THAOC_02542 PE=4 SV=1	-	-	-	-	-	-	-	-	-	-	-
216	EJK66477.1	hypothetical protein THAOC_12605 [Thalassiosira oceanica]	12195.4	0.08	1	1	-	0.79	0.122	4	0.0493	EJK66477.1	MATDTGNPSTGTTDLKSGPFNVLYKAVKGNTQVLVNVRNNHKLLGRVKAYDRHMNLLLEDVKEMWTEQSKGGKGKKRGTSVNKDRYVSKMFLRGDSVILVVSNPAALAGASQ	100	9e-70	gi|397621815|gb|EJK66477.1|	hypothetical protein THAOC_12605 [Thalassiosira oceanica]	68.82	3e-35	sp|P62317|SMD2_MOUSE	Small nuclear ribonucleoprotein Sm D2 OS=Mus musculus GN=Snrpd2 PE=1 SV=1	100	2e-68	tr|K0T7M3|K0T7M3_THAOC	Uncharacterized protein OS=Thalassiosira oceanica GN=THAOC_12605 PE=4 SV=1	-	-	-	-	-	-	-	K11096|1|2e-36|123|ath:AT2G47640| small nuclear ribonucleoprotein D2	GO:0001510//RNA methylation		GO:0005730//nucleolus;GO:0005732//small nucleolar ribonucleoprotein complex;GO:0005829//cytosol
217	EED94486.1	predicted protein, partial [Thalassiosira pseudonana CCMP1335]	84149.5	0.03	2	2	XP_002289050.1	0.75	0.053	4	0.003796	EED94486.1	NQVVVGGVDDLIGLTHLHEPAILHALLLRYEDDIIYTSTGPILIAINPFKSMPLYTDDVMQQYRLQGERGVSVSGGEVKGSSDDNETATNQSILVSGESGAGKTVTTKIVLNYFAMLSKLVMTDDTNQEEESAAVTSSSVEQQVLDSNPILESFGNARTIRNDNSSRFGKYIDIRFSHNGRLTGASIDTYLLEKVRLIRQTEGERNFHVFYQLLEAATDQERDDYFLGDMKLEDFALVNQSGTYDRRDMVSDVDMHREMLDAMSTMGFDPMMIKNIMRLIVAVLYAGNMTFTEITSHKGETCTLDETEASEAVACLLGVSFEKLAAALTSRVLFLKEEVIIKELSAKQAYKASEALIKSIYGANFDFIVETINKSIHNDKIDKRNDKSAYIGVLDIFGF…	100	0	gi|223998754|ref|XP_002289050.1|	predicted protein [Thalassiosira pseudonana CCMP1335]	40.27	4e-156	sp|F4HXP9|MYO9_ARATH	Myosin-9 OS=Arabidopsis thaliana GN=XI-C PE=2 SV=1	100	0	tr|B8BWB0|B8BWB0_THAPS	Uncharacterized protein (Fragment) OS=Thalassiosira pseudonana GN=THAPSDRAFT_33225 PE=4 SV=1	-	-	-	-	-	-	-	K10357|1|1e-163|504|vra:106770754| myosin V		GO:0005524//ATP binding;GO:0003774//motor activity	GO:0016459//myosin complex
218	EJK67751.1	hypothetical protein THAOC_11178 [Thalassiosira oceanica]	132833	0.014	1	1	-	0.66	0.141	4	0.0284	EJK67751.1	MKFQSSVLVGALLSSSAGCLRSGSPRREAGDAAVVVRAAVLRQARVRPPRRAGSVRRYNWNISRQNIAAAARPRRDGARPGRRGRARGARRLHPDARPGRVEALVEDLEPEARQARRRGHDPVDVRARGGHDAVPPPRRAGRGGVLAAATAGGIGKSAVEEDVRRSCPSAIARRLRELGLDDPNVADGIARLAEDHDVDDEDFGAMKTEIYAIYLNGMAKNPLTKTGELKELQSLRSALGLTNQQVGQAHGDAAKMFYRDVQRFTTVDELDDEDHPDRISLDKLLFLTERALRQGGETDKAFTFEFSRVALGLGGLTVDEALERAKDVATPFYERALASTRAKLESGAVSPDMLSRARSTLGIEDFEAKEMHIESFAKEVRVQLGLPEEDDDEYDDYDA…	100	0	gi|397625326|gb|EJK67751.1|	hypothetical protein THAOC_11178 [Thalassiosira oceanica]	-	-	-	-	100	0	tr|K0T360|K0T360_THAOC	Uncharacterized protein OS=Thalassiosira oceanica GN=THAOC_11178 PE=4 SV=1	-	-	-	-	-	-	-	-	-	-	-
219	EJK76253.1	hypothetical protein THAOC_01996 [Thalassiosira oceanica]	168146	0.078	2	6	-	0.83	0.05	4	0.007921	EJK76253.1	MLRPFARGGSPAAFMNKLSGRTSNLRSTGRLMATQSGDDAAPPTALAKLHLEDGTTLTGRSFGCHESQTGEVGVVFTTGMVGYPEALTDPSYQGQIITLTTPMVGNYGVPDRTKLDKFGLPAMFESYKIHASGLIVQDYAHHYSHWKAASSLGDWLKEEGIPGLCDIDTRMLTKKIREKGALVGRIEVDLDAPPPTSWENPNEHRHLVAEVSAKEPRVYGKGNPIKIMGVDCGMKYNMIRLLVDRGCELTVVPWDHPFASDMHNYDGIFLSNGPGDPTSCKETIEQLKQAISVPDNEVKPIFGICLGNQLLGIAAGGEAKKLPFGNRGQNQPVINHATGECYITSQNHGYHIDTTTLGDDYKELFTNLNDASNEGFIHKSRPYFTAQFHPEYRNGPTDT…	100	0	gi|397644104|gb|EJK76253.1|	hypothetical protein THAOC_01996 [Thalassiosira oceanica]	55.09	0	sp|P31327|CPSM_HUMAN	Carbamoyl-phosphate synthase [ammonia], mitochondrial OS=Homo sapiens GN=CPS1 PE=1 SV=2	100	0	tr|K0TC35|K0TC35_THAOC	Uncharacterized protein OS=Thalassiosira oceanica GN=THAOC_01996 PE=3 SV=1	gi|313202999|ref|YP_004041656.1|	1527	0	COG0505	Carbamoylphosphate synthase small subunit	EF	Amino acid transport and metabolism;Nucleotide transport and metabolism	K11541|1|0.0|1505|cme:CYME_CMQ255C| carbamoyl-phosphate synthase / aspartate carbamoyltransferase [EC:6.3.5.5 2.1.3.2]!K11540|2|0.0|1459|gsl:Gasu_42540| carbamoyl-phosphate synthase / aspartate carbamoyltransferase / dihydroorotase [EC:6.3.5.5 2.1.3.2 3.5.2.3]!K01955|4|0.0|748|csl:COCSUDRAFT_25106| carbamoyl-phosphate synthase large subunit [EC:6.3.5.5]	GO:0070409//carbamoyl phosphate biosynthetic process;GO:0006543//glutamine catabolic process	GO:0046872//metal ion binding;GO:0005524//ATP binding;GO:0004088//carbamoyl-phosphate synthase (glutamine-hydrolyzing) activity	-
220	EED89095.1	predicted protein [Thalassiosira pseudonana CCMP1335]	62377.4	0.036	2	5	XP_002293359.1	0.45	0.028	4	0.0001346	EED89095.1	MPLFQKLKAAGCLPEGVNSPQDVAKAIIDAVPSDNPVLCEMNVNGPGFIMSRIKREYLERGVNHIIKNGAPTKPKSAGRNDASGGGGVVVVDFSSPNIAKEMHVGHLRSTIIGESVCRILSYVGHDVKRINHVGDWGTQFGMLIQYLKEEYPDFHGDIPNITDLTEFYKNAKMRFDESPEFKKISQLNVVKLQAGDEECRKIWQVLCDVSRKEFEKVYDRLDITVEECGESFYNDKIAPVIEEFDSRGLVSVEEGGAKCVFVPKYKVPLMLQKSDGGYGYDSTDMAAIKYRLDQMKASQIVYITDFTQGDHFQMVFAAAKKIGWVSEDSHRLDHIGFGTVQGEDGKRFKTRSGDTVRLVDLLDEAVSRMETSLKERATDGKAAVDDAEIHATASAMGYG…	100	0	gi|224008801|ref|XP_002293359.1|	predicted protein [Thalassiosira pseudonana CCMP1335]	49.91	6e-177	sp|O23247|SYRM_ARATH	Arginine--tRNA ligase, chloroplastic/mitochondrial OS=Arabidopsis thaliana GN=EMB1027 PE=1 SV=1	100	0	tr|B8CBA7|B8CBA7_THAPS	Uncharacterized protein OS=Thalassiosira pseudonana GN=THAPSDRAFT_42213 PE=3 SV=1	gi|186684132|ref|YP_001867328.1|	464	2e-156	COG0018	Arginyl-tRNA synthetase	J	Translation, ribosomal structure and biogenesis	K01887|1|0.0|526|eus:EUTSA_v10024637mg| arginyl-tRNA synthetase [EC:6.1.1.19]	GO:0006420//arginyl-tRNA aminoacylation	GO:0004814//arginine-tRNA ligase activity;GO:0005524//ATP binding	GO:0005737//cytoplasm
221	XP_002287939.1	predicted protein [Thalassiosira pseudonana CCMP1335]	65803.3	0.103	5	7	EED95382.1	0.68	0.039	4	0.0008649	XP_002287939.1	MGHVDTGKTKLLDKIRKTNVQEGEAGGITQQIGATYFEKSTLLTQTAKLNETEKFDLTLPGMLVIDTPGHESFTNLRSRGSSLCDVAILVVDLMHGLEQQTIESLHMLKNRGTPFVVALNKVDRCYAWKTCKDTPIRDALKEQSDGTLNEFRSRASDAKLQLQEQGVNSNIYWEMGDDDWENSDFVPLVPTSAVTGEGVQDILMLLCQIAQRKLWSQLMWCANLQATVLEVKAIDGLGMTVDVLVVNGYLREGDRAVFCTLDGPIVAEIRGLLTPPPSREMRIKSEYIHHKEIKGALGVKVIGNGLEKVMAGTSVLVVGPDDEVEDIKAEVMSDLTKLQDKLSTDKKGVMVQASTLGALEALLQFLREETKPPIPVSAIGIGTIHKRDVTKISIMNEKG…	100	0	gi|223996531|ref|XP_002287939.1|	predicted protein [Thalassiosira pseudonana CCMP1335]	54.09	0	sp|G0S8G9|IF2P_CHATD	Eukaryotic translation initiation factor 5B OS=Chaetomium thermophilum (strain DSM 1495 / CBS 144.50 / IMI 039719) GN=CTHT_0029840 PE=1 SV=2	100	0	tr|B8BV18|B8BV18_THAPS	Uncharacterized protein OS=Thalassiosira pseudonana GN=THAPSDRAFT_273 PE=4 SV=1	gi|305662649|ref|YP_003858937.1|	373	2e-120	COG0532	Translation initiation factor IF-2, a GTPase	J	Translation, ribosomal structure and biogenesis	K03243|1|0.0|640|ppp:PHYPADRAFT_146718| translation initiation factor 5B	GO:0006184//GTP catabolic process	GO:0003924//GTPase activity;GO:0005525//GTP binding	-
222	EJK48596.1	hypothetical protein THAOC_32592 [Thalassiosira oceanica]	31439.8	0.182	2	5	-	0.72	0.071	4	0.006202	EJK48596.1	MASAFASLPAVLQPKEEDIQMMLSAGVHTGTRNSDSAMEEYIWRRRKDGLHVLNIGKTWEKIMLAARVIVAIENPEDVVAISARPWGMRAVLKFAHYTGSQSIAGRFTPGTFTNQITKQFREPRLLIVTDPRTDSQAVRESSYVNIPVIAFCDSDSPLQHVDIAIPANNKGKHSIGLMYWMLAREVLRLRGSVSRSVDWDVPVDLFFHRDIEELKKTEEEQAAAKLQAEQQPAPAYEQEVPAGDGAFEQPVPEAAAAATSEPAAEGGAQQWQAAPADAQASAAAEW	100	3e-156	gi|397573199|gb|EJK48596.1|	hypothetical protein THAOC_32592 [Thalassiosira oceanica]	66.02	8e-104	sp|A8N7C6|RSSA_COPC7	40S ribosomal protein S0 OS=Coprinopsis cinerea (strain Okayama-7 / 130 / ATCC MYA-4618 / FGSC 9003) GN=RPS0 PE=3 SV=1	100	8e-155	tr|K0RI69|K0RI69_THAOC	40S ribosomal protein SA OS=Thalassiosira oceanica GN=THAOC_32592 PE=3 SV=1	gi|312137116|ref|YP_004004453.1|	197	2e-61	COG0052	Ribosomal protein S2	J	Translation, ribosomal structure and biogenesis	K02998|1|8e-103|302|smo:SELMODRAFT_36118| small subunit ribosomal protein SAe	GO:0006412//translation;GO:0009651//response to salt stress;GO:0042256//mature ribosome assembly	GO:0003735//structural constituent of ribosome	GO:0015935//small ribosomal subunit;GO:0009507//chloroplast;GO:0022626//cytosolic ribosome;GO:0005634//nucleus;GO:0005886//plasma membrane
223	EJK45384.1	hypothetical protein THAOC_36003 [Thalassiosira oceanica]	12461	0.136	1	2	-	0.78	0.052	4	0.004669	EJK45384.1	MSDMQFGNNFDAFKDAADEPGHSQGDKVHVRVQQRNGRKCITTVAGLADDLDIKRICKAFKKNFSCNGAVQKCEETGEVIQLSGDQRTNVKEFLVDQEICHSDAVVLHGF	100	9e-77	gi|397567086|gb|EJK45384.1|	hypothetical protein THAOC_36003 [Thalassiosira oceanica]	47.27	3e-29	sp|P79060|SUI1_SCHPO	Protein translation factor sui1 OS=Schizosaccharomyces pombe (strain 972 / ATCC 24843) GN=sui1 PE=3 SV=3	100	2e-75	tr|K0R2H0|K0R2H0_THAOC	Uncharacterized protein OS=Thalassiosira oceanica GN=THAOC_36003 PE=4 SV=1	-	-	-	-	-	-	-	K03113|1|3e-31|110|csl:COCSUDRAFT_30561| translation initiation factor 1	GO:0006413//translational initiation	GO:0003743//translation initiation factor activity	-
224	EED94760.1	zeaxanthin epoxidase, partial [Thalassiosira pseudonana CCMP1335]	53024.2	0.019	1	2	XP_002287317.1	0.69	0.041	4	0.001091	EED94760.1	MADDEADADFNSSDYELLGRPARPGRPLKVAIAGGGVGGLTAALCMLKKGFDVTVYEKTAAFARFGGPIQFASNALSVIKEIDEELFERVMDKFTFTGTRACGIKDGLRADGSFRMTNDSLDYLWNPEAPADWFVKFPLRQCADLFGLPYTGVIDRPDLQEILLDECRKIKPDFIQNGNPVNGYVSKGKGNGVTVNLADGTTAEADVLVGSDGIWSAIRAQMYGEEIKKSSNNALKRQGCTYSGYTVFAGETVLKTEDYYETGYKVYIGPQRYFVTSDVGDGRVQWYAFFALPPGTKKAPSGWGDYIKSLHQGWSDEVMTVLDSTPPDSVEQRDLYDRPPELLRSWADGNVVLIGDAVHPMMPNLGQGGCQAIEDAFVLSETLEACESTQKLEDALQDF…	100	0	gi|223995267|ref|XP_002287317.1|	zeaxanthin epoxidase [Thalassiosira pseudonana CCMP1335]	35.78	2e-69	sp|Q0JCU7|ZEP_ORYSJ	Zeaxanthin epoxidase, chloroplastic OS=Oryza sativa subsp. japonica GN=ZEP PE=2 SV=1	100	0	tr|B8BUH8|B8BUH8_THAPS	Zeaxanthin epoxidase (Fragment) OS=Thalassiosira pseudonana GN=THAPSDRAFT_261390 PE=4 SV=1	gi|383456699|ref|YP_005370688.1|	166	3e-45	COG0654	2-polyprenyl-6-methoxyphenol hydroxylase and related FAD-dependent oxidoreductases	HC	Coenzyme transport and metabolism;Energy production and conversion	K09838|1|6e-75|246|nnu:104597550| zeaxanthin epoxidase [EC:1.14.15.21]	GO:0055114//oxidation-reduction process	GO:0016709//oxidoreductase activity, acting on paired donors, with incorporation or reduction of molecular oxygen, NAD(P)H as one donor, and incorporation of one atom of oxygen	-
225	EJK56445.1	hypothetical protein THAOC_23660 [Thalassiosira oceanica]	104735	0.021	1	3	-	0.54	0.168	4	0.02616	EJK56445.1	MRLSNASLLLAAAAALLSSTQQSSTLFAAAQHSSSKPRSCPGGATPDSDGSCPNPDMIEESSSSDDDEDQSRQSGNPNAHKMEEGEEKPPTTCDSYLRLAGFKDAVYETRSFYQEVAWSENANKPDVCMSLDDILQICHSYRPHYHEPYVHFPAAYLKEMKRIVFIGGGDAMLLHESLKYPNVELVLGLELDQKVVRESLKHFHIQPHFDDPRVQWWFGDASKSLALIPREWFGTFDLVMVDLSETAMSISVTDDLDIFGALSLLMKPDGIFVKNELYYGQMHMETNNIHTFEYTPLEDEDDHYKLIKDYSRNDARKQGKCDLYDREMKERAANGGELMKKDPVVPTKSAGVLLVVEAEGVKDFSGLAGALKDILTKQGLKPIGDVAGSSSTTDGFEAT…	100	0	gi|397595310|gb|EJK56445.1|	hypothetical protein THAOC_23660 [Thalassiosira oceanica]	34.59	8e-14	sp|B0K172|SPEE_THEPX	Polyamine aminopropyltransferase OS=Thermoanaerobacter sp. (strain X514) GN=speE PE=3 SV=1	100	0	tr|K0RTV3|K0RTV3_THAOC	Uncharacterized protein OS=Thalassiosira oceanica GN=THAOC_23660 PE=4 SV=1	gi|317123031|ref|YP_004103034.1|	75.9	5e-13	COG0421	Spermidine synthase	E	Amino acid transport and metabolism	K00797|1|3e-14|77.0|zma:100279222| spermidine synthase [EC:2.5.1.16]	GO:0008152//metabolic process	GO:0016765//transferase activity, transferring alkyl or aryl (other than methyl) groups	-
226	EJK59523.1	hypothetical protein THAOC_20233 [Thalassiosira oceanica]	84795.1	0.013	1	1	-	0.78	0.052	4	0.004682	EJK59523.1	MGCNQSTSVTAKKRRPNGGPPIALTSHERSQRIESIKETRACGLGGISVRYAYLSQRGYYPDGAWISCMKCDSQTPRTRLNAGTRRPRRLFTQILDQNKANQDSYSVTHDFAGQTADAFFGVYDGHGRDGDKCAQFVRDTLPTLLAEGMTKARENNDGAELTKERKQAIILNAHRECNMKMHSQDDFDDSLSGTTSISVYLHGNTNRITVSNVGDSRTIIGRQMQTSEVENGSSSSGGALKAFALSRDQTPYRRDERVRIRRTGGRILSLDQIEGLEPIREDEKERDEKALMNGGGEDIILGEEIDESGDPPRVWSPNGDYPGTAFTRSIGDAIAEELGVHADPEMLSRELTPEDKIIVIASDGVFEFLTNQSVIDICAKFSDPLEACRAVVAESYELW…	100	0	gi|397607036|gb|EJK59523.1|	hypothetical protein THAOC_20233 [Thalassiosira oceanica]	35.53	3e-102	sp|Q9SL76|P2C19_ARATH	Protein phosphatase 2C and cyclic nucleotide-binding/kinase domain-containing protein OS=Arabidopsis thaliana GN=At2g20050/At2g20040 PE=2 SV=2	100	0	tr|K0S094|K0S094_THAOC	Uncharacterized protein OS=Thalassiosira oceanica GN=THAOC_20233 PE=3 SV=1	gi|294053613|ref|YP_003547271.1|	65.5	1e-09	COG0664	cAMP-binding domain of CRP or a regulatory subunit of cAMP-dependent protein kinases	T	Signal transduction mechanisms	K19477|1|1e-110|363|smo:SELMODRAFT_443005| cGMP-dependent protein kinase 2 [EC:2.7.11.12]!K17506|4|7e-27|116|adu:107475582| protein phosphatase 1L [EC:3.1.3.16]!K10147|5|8e-27|118|ccp:CHC_T00006477001| protein phosphatase 1D [EC:3.1.3.16]	GO:0006464//cellular protein modification process;GO:0006796//phosphate-containing compound metabolic process	GO:0016787//hydrolase activity	-
227	XP_002290123.1	RL4e, ribosomal protein 4e 60S large ribosomal subunit [Thalassiosira pseudonana CCMP1335]	41232	0.188	3	11	EED91875.1	0.41	0.233	4	0.04179	XP_002290123.1	MAARPLVSVFSLTGEKAGETTLPEVMTAPMRTDIVQFVHTNMNKNNRQAYAVNVHAGKLVSAESWGTGRAVARIPRVGGGGTSRSGQGAFGNMCRGGRMFAPTKTWRKWHRKINVTQKRYAVASALAATAVPALVMARGHKVDDVPEIPLVLDNTLESAKKTSAAKDILAAVGALADVEKAADSKKIRAGKGKARNRRYTLRRGPLVIYKSNDGVEQAFRNLPGVELCCVDRLNLLQLAPGGHMGRFCIWSQAALDALNTIYGKEGKSIPEDLMANADLARIINSDEIQSVLNPAKRANKKFLRKKNPLTSIKALAKLDPYAAAARESEQRAEAARKDQKAAILKKRRETAKEDSLIVVFAGVLKICSRLRMNIGTGI	100	0	gi|224000902|ref|XP_002290123.1|	RL4e, ribosomal protein 4e 60S large ribosomal subunit [Thalassiosira pseudonana CCMP1335]	60.19	8e-116	sp|Q9SF40|RL4A_ARATH	60S ribosomal protein L4-1 OS=Arabidopsis thaliana GN=RPL4A PE=1 SV=1	100	0	tr|B8C239|B8C239_THAPS	RL4e, ribosomal protein 4e 60S large ribosomal subunit OS=Thalassiosira pseudonana GN=RL4e PE=4 SV=1	gi|15678034|ref|NP_275148.1|	193	6e-58	COG0088	Ribosomal protein L4	J	Translation, ribosomal structure and biogenesis	K02930|1|2e-127|374|zma:100194262| large subunit ribosomal protein L4e	GO:0006412//translation	GO:0003735//structural constituent of ribosome	GO:0005840//ribosome;GO:0043231//intracellular membrane-bounded organelle
228	XP_002295845.1	predicted protein, partial [Thalassiosira pseudonana CCMP1335]	9501.24	0.412	2	2	ACI64562.1	0.67	0.144	4	0.0301	XP_002295845.1	VGIPIVLLHDAEGAVVTVETKRGELIRGLLFEAEDMMNLYLKKAVVLGPKPGAKRNVEQVYVRGTEIVFIVLPEMLRHAPMFQRI	100	5e-55	gi|224004388|ref|XP_002295845.1|	predicted protein [Thalassiosira pseudonana CCMP1335]	47.62	7e-23	sp|O44437|SMD3_DROME	Small nuclear ribonucleoprotein Sm D3 OS=Drosophila melanogaster GN=SmD3 PE=1 SV=1	100	1e-53	tr|B5YN26|B5YN26_THAPS	Predicted protein (Fragment) OS=Thalassiosira pseudonana GN=THAPS_19743 PE=4 SV=1	-	-	-	-	-	-	-	K11088|1|2e-24|92.4|vcn:VOLCADRAFT_79410| small nuclear ribonucleoprotein D3			GO:0044424//intracellular part
229	EJK50135.1	hypothetical protein THAOC_30934, partial [Thalassiosira oceanica]	90111.3	0.009	1	1	-	0.34	0.055	4	0.001008	EJK50135.1	SVESATLDALTSTLRGCNAHLGGSAIGKGFRLAARYHLHHRAPETALLRNRPGAGEASSSSSSPSPPGRCDCYDASALEPDVAHTIEDPFYVVDLGIVTAQLARWRAAFPRVVPYYAVKCNPDPAIVRTLMSMGCNFDCASRAEIELVRDVASTLPAELSRPDIVYANPCKSRGHVIDAVCRGVRLMTYDNVAEVQKCARVSRKIKLILRIITDDSGSQCRLSSKFGAPPQHWPALLAEARRCGLDVVGVSFHVGSGCRDATRYEMALRDCKRLFEMAERDYGFKMTLLDIGGGFPGETHSMWSPAKAFGDPTSKERPEASVVPPGIPSVTPIREDEEEDDDDEEDDGSSQEGKEPDAISDDDGGKERQYMYFNEIAEAVAPMLDEMFPPESGVRIIAE…	100	0	gi|397576224|gb|EJK50135.1|	hypothetical protein THAOC_30934, partial [Thalassiosira oceanica]	48.6	4e-57	sp|Q9I8S4|AZIN2_XENLA	Antizyme inhibitor 2 OS=Xenopus laevis GN=azin2 PE=2 SV=1	100	0	tr|K0RAD0|K0RAD0_THAOC	Uncharacterized protein (Fragment) OS=Thalassiosira oceanica GN=THAOC_30934 PE=3 SV=1	gi|182412516|ref|YP_001817582.1|	152	2e-38	COG0019	Diaminopimelate decarboxylase	E	Amino acid transport and metabolism	K01581|1|2e-53|197|gsl:Gasu_54820| ornithine decarboxylase [EC:4.1.1.17]	GO:0006596//polyamine biosynthetic process	GO:0003824//catalytic activity	-
230	EJK49013.1	hypothetical protein THAOC_32141 [Thalassiosira oceanica]	67309	0.012	1	1	-	0.67	0.039	4	0.0007989	EJK49013.1	MEEYLVPLQTDCVYHDPRFLDEDDATAAFAQLLETTPFEKSAKINRWTALYELPSAGGGDADDKAGSYKYRDAPGASRIGFPPAVNQMKTKAEEWYSSKTGRSVNFNVCLLNYYEDGTQRIGWHSDREEIGRSTPIASISLGATRQFYVRSKTDGVRDRATLSLANGSLVVMENVCQMKYLHSVPKEGDVTEGRINLTFRCKSEGEGATAGELEHERRDHWITQISTEQGAFDTAASAWKEDQGVESNSVVFGDDAIFYDDANYSEGRVKQTLECVIKTNIGAESYCASEVNEVIDVERFHTLARPFGIAAYVAVCRRDAEDSVDADDRAKIHGSLLRLHSAHHVLQYHDHFELSDVVAFLELGATPPDDGEDAETRLGTNSVTGEQLYEYYKDRLVKG…	100	0	gi|397574073|gb|EJK49013.1|	hypothetical protein THAOC_32141 [Thalassiosira oceanica]	30.85	2e-17	sp|Q2T9W2|THUM3_BOVIN	THUMP domain-containing protein 3 OS=Bos taurus GN=THUMPD3 PE=2 SV=1	100	0	tr|K0R6L4|K0R6L4_THAOC	Uncharacterized protein OS=Thalassiosira oceanica GN=THAOC_32141 PE=4 SV=1	gi|38505765|ref|NP_942385.1|	102	6e-23	COG3145	Alkylated DNA repair dioxygenase AlkB	L	Replication, recombination and repair	K10860|1|3e-12|72.0|ats:F775_04874| mRNA N1-methyladenine demethylase [EC:1.14.11.54]		GO:0016491//oxidoreductase activity	-
231	ABK20839.1	30S ribosomal protein S6 (chloroplast) [Thalassiosira pseudonana]	12017.3	0.262	1	1	XP_002297557.1;EED86142.1;YP_874616.1;sp|A0T104.1|RR6_THAPS	0.52	0.109	4	0.008044	ABK20839.1	MSTTIKYEMMILLTEEFNDNELKTWAFNYAKALRKLNASEISVISRGKRDLSYEIANQKRGNFIQISFSSIPKYIENFSSSLKFDSNVLRFLVLNKTNNVKKF	100	9e-69	gi|118411222|ref|YP_874616.1|	30S ribosomal protein S6 [Thalassiosira pseudonana]	100	1e-69	sp|A0T104|RR6_THAPS	30S ribosomal protein S6, chloroplastic OS=Thalassiosira pseudonana GN=rps6 PE=3 SV=1	100	2e-67	tr|B8LEV3|B8LEV3_THAPS	Predicted protein OS=Thalassiosira pseudonana GN=THAPSDRAFT_bd1447 PE=3 SV=1	gi|434405160|ref|YP_007148045.1|	60.1	2e-11	COG0360	Ribosomal protein S6	J	Translation, ribosomal structure and biogenesis	-	GO:0006412//translation	GO:0003735//structural constituent of ribosome;GO:0019843//rRNA binding	GO:0005840//ribosome;GO:0009507//chloroplast
232	EED87082.1	26S proteasome regulatory subunit Rpn2 26S subunit, non-atpase [Thalassiosira pseudonana CCMP1335]	123138	0.039	4	9	XP_002296386.1	0.74	0.035	4	0.001122	EED87082.1	MDTDIPLVKQRESTDLRRRSPTLHPAELSVPTALPNRHPKNRAMASIATPLHNPMSQQQQQQQRTPIATASGLLALLSEPDPTLVKIALQKLLSVVDTLWHEIAEALPDLEAIAEGGSVVVVGGDDDDQDMAGAGGDVVYDLSTRQTAAALASRVFFHLEEPRQALRLALESGSHFELIMSGTLDNEGVNLKDVAYVERLVNCAVGEYVRRRQREFDDGIVVGGGDSAEEGKEDEEEELDIDKLQIVVSHQFQRCYQDKAYPHALGVAFESRQLSKVEEILTMLLKNNKDTDVPHIVQVLQYALTSAESFITSKSFRAEALRLVGNTLTTVLELPTASPSVKRSAACTLVLCMQLLNDASAVGGMLGKLMEGGEDEGLLGLQLCFDIVDSGDQKFVNGV…	100	0	gi|224013444|ref|XP_002296386.1|	26S proteasome regulatory subunit Rpn2 26S subunit, non-atpase [Thalassiosira pseudonana CCMP1335]	33.58	6e-166	sp|Q9MAT0|PSD1B_ARATH	26S proteasome non-ATPase regulatory subunit 1 homolog B OS=Arabidopsis thaliana GN=RPN2B PE=1 SV=1	100	0	tr|B8LBP1|B8LBP1_THAPS	26S proteasome regulatory subunit Rpn2 26S subunit, non-atpase OS=Thalassiosira pseudonana GN=RPN2 PE=4 SV=1	-	-	-	-	-	-	-	K03032|1|1e-173|538|ppp:PHYPADRAFT_166351| 26S proteasome regulatory subunit N2	GO:0042176//regulation of protein catabolic process;GO:0050790//regulation of catalytic activity	GO:0030234//enzyme regulator activity	GO:0000502//proteasome complex
233	XP_002288348.1	RL24, ribosomal protein 24 60S large ribosomal subunit, partial [Thalassiosira pseudonana CCMP1335]	13747.8	0.16	2	3	EED93784.1;EJK61686.1	0.55	0.193	4	0.03659	XP_002288348.1	ELCAMSEYRIWPGTGKLFIRRDGKPIFLGSSKAQSLTLQRKKPAKLVWTQAWRRLHKKGLSETNLKKRRTRTNKVQRAVVGLSLEDIKKKASQKAEFRSAQRDAALKEVKDRKKANKAK	100	6e-81	gi|223997350|ref|XP_002288348.1|	RL24, ribosomal protein 24 60S large ribosomal subunit [Thalassiosira pseudonana CCMP1335]	48.31	2e-28	sp|Q92354|RL24A_SCHPO	60S ribosomal protein L24-A OS=Schizosaccharomyces pombe (strain 972 / ATCC 24843) GN=rpl2401 PE=3 SV=1	100	1e-79	tr|B8BXX5|B8BXX5_THAPS	RL24, ribosomal protein 24 60S large ribosomal subunit (Fragment) OS=Thalassiosira pseudonana GN=RL24 PE=4 SV=1	-	-	-	-	-	-	-	K02896|1|6e-27|100|cvr:CHLNCDRAFT_29622| large subunit ribosomal protein L24e			GO:0005840//ribosome
234	EJK55119.1	hypothetical protein THAOC_25185 [Thalassiosira oceanica]	85339	0.075	2	4	-	0.73	0.092	4	0.01563	EJK55119.1	MKLSVAASIVLSTAVPSCAFVAMPPSARRGVTSTKFAGACGSAAGARPLMMSEVVDAETVEAPAGETFEFQAEVGRVMDIIINSLYSNRDVFLRELVSNAADACDKRRFLSITSDDAASVTPTISIKTDKDAMTVTIEDTGVGMTRSELQNNLGRIAQSGTKKFVEALGDGSADVNLIGQFGVGFYSAYLVADKVDVITKSMQDGSPQLRWSSNASSSYTISEDDGEPIEGSGTRLVLHLKDDALEYLEPTKLEGLLQQYSEFVEFPISVWKEKTEYKQVPDEEANKDLGEDEEPKMKTVPETTEGYERMNTNKPIWLRSPSDVTEEEYKDFYQSAFRAQYDEPMAHTHFSLEGQIECKSVLYIPGMLPFELSKDMFDEDARNIRLYVKRVFINDKFED…	100	0	gi|397590674|gb|EJK55119.1|	hypothetical protein THAOC_25185 [Thalassiosira oceanica]	45.57	0	sp|Q9SIF2|HS905_ARATH	Heat shock protein 90-5, chloroplastic OS=Arabidopsis thaliana GN=HSP90-5 PE=1 SV=1	100	0	tr|K0RRZ8|K0RRZ8_THAOC	Uncharacterized protein OS=Thalassiosira oceanica GN=THAOC_25185 PE=3 SV=1	gi|108760025|ref|YP_634186.1|	466	1e-153	COG0326	Molecular chaperone, HSP90 family	O	Posttranslational modification, protein turnover, chaperones	K09487|1|0.0|650|ccp:CHC_T00002029001| heat shock protein 90kDa beta	GO:0009414//response to water deprivation;GO:0006457//protein folding;GO:0009651//response to salt stress;GO:0010157//response to chlorate;GO:0009408//response to heat;GO:0009658//chloroplast organization;GO:0048481//ovule development;GO:0009704//de-etiolation	GO:0005524//ATP binding;GO:0051082//unfolded protein binding	GO:0005829//cytosol;GO:0005739//mitochondrion;GO:0009941//chloroplast envelope;GO:0005774//vacuolar membrane;GO:0009570//chloroplast stroma
235	EED91656.1	predicted protein [Thalassiosira pseudonana CCMP1335]	66416.3	0.011	1	1	XP_002291549.1	0.52	0.118	4	0.009667	EED91656.1	MTVRRIASLAIGISLSTLTCAFVTISSSRTTIKPLNVVGEQASSIGPATLLRNLKQNLPQIDWLAEGKGSPSNKIDIPDHVATVLAQPNAPKREAESEERTHKIRSRAKQASEDAMALRGMLIGDDDANAWWREQRSIPEGGRVVTTDDPLTVLVAGGGLAGLVVAAACHSKGMKVALFEQASSYAPYGGPIQIQSNALRALQQINPEIFQELVTAGTCTADRVSGLKIGYKKGNKLAGLYDAGDWLVRFDTIGPALEAGLPATVVVDRPVIQQILVKYGFPEGTVRIKSRIQSYEDLGKGRGVSVTLEDGTKAYADVLVGADGIWSQVRKNLHGLDDGAGGFAASGAAGGALDDAEARKLARDTVAIAAKADRRFSGFTCYAALAPHRASNIENVSYQ…	100	0	gi|224003755|ref|XP_002291549.1|	predicted protein [Thalassiosira pseudonana CCMP1335]	36.85	8e-72	sp|O81360|ABA2_PRUAR	Zeaxanthin epoxidase, chloroplastic OS=Prunus armeniaca PE=2 SV=1	100	0	tr|B8C448|B8C448_THAPS	Uncharacterized protein OS=Thalassiosira pseudonana GN=THAPSDRAFT_270370 PE=4 SV=1	gi|108764014|ref|YP_631595.1|	138	5e-34	COG0654	2-polyprenyl-6-methoxyphenol hydroxylase and related FAD-dependent oxidoreductases	HC	Coenzyme transport and metabolism;Energy production and conversion	K09838|1|2e-75|257|nnu:104606289| zeaxanthin epoxidase [EC:1.14.15.21]	GO:0055114//oxidation-reduction process	GO:0016491//oxidoreductase activity	-
236	EJK46860.1	nitrate reductase [Thalassiosira oceanica]	104105	0.024	3	4	-	0.79	0.075	4	0.01438	EJK46860.1	MVLVRSKGAVSESSVDLTTLIKPSTSITNLKRHESFVKKEHTCTELYGPYPSSVPVPMTHKDGRTPSPYVVAKAKTMWDMQSFPDHRDVGTPDEWIPRDGKLVRLTGRHPFNVEPPLFVHQKHKFITPTCLHYVRNHGACPNLAWETHRVRVGGIVPRPLDLSMDEIESMPDRELPVTLVCAGNRRKEQNMIRQTIGFNWGAGGVSTNVWKGVLLRDLLIAAGVSESNMTGKHVEFIGHEDLPNKVGPGPFKDEPWGKLVKYGTSVPLARAMNPAYDILIAYEANGERLQPDHGFPVRLIIPGYIGGRMIKWLTDINVLEHETKNHYHYHDNRILPPHVTAEESLTGGWWYKPEYIFNELNINSAMTAPDHGETIDLAKNIGSTYEVGGYSYTGGGRRI…	100	0	gi|397569621|gb|EJK46860.1|	nitrate reductase [Thalassiosira oceanica]	47.05	0	sp|P39869|NIA_LOTJA	Nitrate reductase [NADH] OS=Lotus japonicus GN=NIA PE=3 SV=1	100	0	tr|K0R3H1|K0R3H1_THAOC	Nitrate reductase OS=Thalassiosira oceanica GN=THAOC_34460 PE=4 SV=1	gi|159899383|ref|YP_001545630.1|	174	3e-46	COG2041	Periplasmic DMSO/TMAO reductase YedYZ, molybdopterin-dependent catalytic subunit	C	Energy production and conversion	K10534|1|0.0|761|ppp:PHYPADRAFT_184973| nitrate reductase (NAD(P)H) [EC:1.7.1.1 1.7.1.2 1.7.1.3]	GO:0042128//nitrate assimilation;GO:0055114//oxidation-reduction process	GO:0050660//flavin adenine dinucleotide binding;GO:0009055//electron carrier activity;GO:0005506//iron ion binding;GO:0020037//heme binding;GO:0030151//molybdenum ion binding;GO:0046857//oxidoreductase activity, acting on other nitrogenous compounds as donors, with NAD or NADP as acceptor;GO:0043546//molybdopterin cofactor binding	-
237	EJK54843.1	hypothetical protein THAOC_25495, partial [Thalassiosira oceanica]	17812.3	0.049	1	1	-	0.49	0.092	4	0.004648	EJK54843.1	MAGLALYDRHVRGGRGPTYLRTSRVNLAFGFGNVILSPWKQNPGRGKGLGGHTSSSRRERKVFALQPFFPRPPTLRRQQQQQQQQQQQQQQEERINAGPEVSTFPDAGPEVGAKGSAFGSMTTLAAPPLIVFSTRPLRVSGAYLSCVPKLKNLADPAAAACRS	100	1e-101	gi|397589921|gb|EJK54843.1|	hypothetical protein THAOC_25495, partial [Thalassiosira oceanica]	-	-	-	-	100	3e-100	tr|K0RM85|K0RM85_THAOC	Uncharacterized protein (Fragment) OS=Thalassiosira oceanica GN=THAOC_25495 PE=4 SV=1	-	-	-	-	-	-	-	-	-	-	-
238	XP_002286873.1	aspartate-trna ligase [Thalassiosira pseudonana CCMP1335]	54002.1	0.059	3	7	EED96514.1;EJK74501.1	0.72	0.103	4	0.01721	XP_002286873.1	MIQSATKSEEGVNKWTKIGALEKEMEGKKVVVRGHLHTSRGVGKGAFVVLRSSLYTVQCVAFESIEIPSAMIKYMTGVPVESIVDVCGVLTCPEKAVEGATQSDVEIQVHSYHCVQKATAPMPFQMEDACRPDLVKETDVASEGGRVGQETRLDHRWIDLRTPANQSIFRIQSMVCTLFREYLLKQNFIEIHTPKILSGASEGGADVFTLDYFGKPACLSMSPQLHKQMAAACGGFERVFEIGPVFRAENSNTRRHLCEFTGLDLEMAIMEHYDEVLDVLGELFVYIFDGLKEKCGQELERIKEQHGFEDLQYLRKTLKIDYATGCRLLREAGVDQDDLDDLSTENEKKLGDIVKEKYNTDFYIMDKYPLSVRPFYTMPDPNNPKLSNSYDIFIRGQEI…	100	0	gi|223994379|ref|XP_002286873.1|	aspartate-trna ligase [Thalassiosira pseudonana CCMP1335]	52.52	3e-178	sp|Q8H104|SYDC1_ARATH	Aspartate--tRNA ligase 1, cytoplasmic OS=Arabidopsis thaliana GN=At4g26870 PE=2 SV=1	100	0	tr|B8BRC4|B8BRC4_THAPS	Aspartate-trna ligase OS=Thalassiosira pseudonana GN=THAPSDRAFT_268068 PE=3 SV=1	gi|406025139|ref|YP_006705440.1|	373	6e-124	COG0017	Aspartyl/asparaginyl-tRNA synthetase	J	Translation, ribosomal structure and biogenesis	K01876|1|0.0|553|csv:101222217| aspartyl-tRNA synthetase [EC:6.1.1.12]	GO:0006422//aspartyl-tRNA aminoacylation	GO:0003676//nucleic acid binding;GO:0005524//ATP binding;GO:0004815//aspartate-tRNA ligase activity	GO:0005737//cytoplasm
239	EJK64680.1	hypothetical protein THAOC_14563 [Thalassiosira oceanica]	31005.5	0.148	4	23	XP_002289569.1;EED93106.1	0.79	0.063	4	0.009619	EJK64680.1	MDKVLSRISSAAGALTVGAFTVNSCLYNVDGGERAVLFDTLRGGILPDVRDEGTHLMIPVIQRPIIIDVRTKPREIPSVTGTKDLQMVNIKLRVLWRPVIEKLPQLYRELGTDFDERVLPSIGNEVLKSVVAQYNAEELLSKRAEVSARIKAELIKRGAHFHLTLDDVSITHLTFGREFMKAIESKQVASQEAERQQYVVMRAEQERIANVTRAEGEAEAATIITKAMEKTGNAIVEVRRIDAAKEIATKLAKGRNITYLPGGGSGGGSDNGNSPGLLLSVDK	100	0	gi|397617939|gb|EJK64680.1|	hypothetical protein THAOC_14563 [Thalassiosira oceanica]	54.51	4e-93	sp|O04331|PHB3_ARATH	Prohibitin-3, mitochondrial OS=Arabidopsis thaliana GN=PHB3 PE=1 SV=1	100	0	tr|K0SHB5|K0SHB5_THAOC	Uncharacterized protein OS=Thalassiosira oceanica GN=THAOC_14563 PE=4 SV=1	gi|410660438|ref|YP_006912809.1|	140	3e-38	COG0330	Regulator of protease activity HflC, stomatin/prohibitin superfamily	O	Posttranslational modification, protein turnover, chaperones	K17080|1|2e-98|293|ppp:PHYPADRAFT_109165| prohibitin 1			GO:0016020//membrane
240	EJK46104.1	hypothetical protein THAOC_35252 [Thalassiosira oceanica]	122349	0.031	2	4	-	0.57	0.042	4	0.0005747	EJK46104.1	MRIAAGVALLLSAHEAQGFAPSTSFSRLQSTVSSNEPSTKLGALPFISKFSKLFNKSSASDDSDADKKRVVVIGNGMVGQRFMENLLDLDAENKCTITTFCEEPRAAYNRVKLTSYFETLDPSSLSMTSDFDDEGKTPWYEDNNVELLLNDKVVSIDTEKKTVKGQSGKEVDYDVAVFATGSYPFVPPIPGKQRPGVFVYRTIEDLESMLAYVKDNGVTSAAVIGGGLLGLEAAKAVADMNVQSHIIEFAPILMCRQIDQGGHDALVGKIEEMGLEVHCGARTEAFVGEDGSTDSESESPVSALRFSNEGWDDLPVQMVVVSAGIKPRDELARDTDGKVAIGERGGIVVDDQLRTSADGVYAIGEIALYNNFIYGLIAPGYDMAGVCSKVVAEEELGLD…	100	0	gi|397568368|gb|EJK46104.1|	hypothetical protein THAOC_35252 [Thalassiosira oceanica]	43.73	0	sp|Q06458|NIRB_KLEOX	Nitrite reductase [NAD(P)H] large subunit OS=Klebsiella oxytoca GN=nasB PE=3 SV=1	100	0	tr|K0R3Q2|K0R3Q2_THAOC	Uncharacterized protein OS=Thalassiosira oceanica GN=THAOC_35252 PE=4 SV=1	gi|294054958|ref|YP_003548616.1|	877	0	COG1251	NAD(P)H-nitrite reductase, large subunit	C	Energy production and conversion	K08232|1|5e-08|60.8|vvi:100253570| monodehydroascorbate reductase (NADH) [EC:1.6.5.4]	GO:0042128//nitrate assimilation;GO:0055114//oxidation-reduction process	GO:0050660//flavin adenine dinucleotide binding;GO:0050661//NADP binding;GO:0020037//heme binding;GO:0051537//2 iron, 2 sulfur cluster binding;GO:0008942//nitrite reductase [NAD(P)H] activity	-
241	EED93720.1	calcium transporting ATPase [Thalassiosira pseudonana CCMP1335]	104536	0.009	1	1	XP_002288284.1;EJK45223.1	0.72	0.078	4	0.00883	EED93720.1	MSYIIEQFDDKLVRILLVVACVSAFFGLVELKEEMGEWALVEPIVITTILIINALVGGYQSLNASKGISALKQMQAQKASAIDEVEVDASSLVPGDVVILTVGQKIPADIRLMSVSTSTFTVDEACLTGESDSVPKIPYKGDVQNDEEHNGHHANGMLYGGTVITAGKGVGVVVRTGMDTEMGKIQCGVTEAASDENAHRTPLAIKLDEFGDTLTVVIGVICTAVWVASIPKFYDPTFKTPIEGAVYYAKVAVALGVAALPEGLPAVITLCLSLGTRRMAKRNVIVRKLQSVETLGCTSVICTDKTGTLTTNEMTAVSLVLLESDEEGGVLVAEHEVSGTSYSPIGTIKGVQHSSEIADNPKGSVSDVAAVASLCNDAIIAASKTYERMGEPTEAALCV…	100	0	gi|223997222|ref|XP_002288284.1|	calcium transporting ATPase [Thalassiosira pseudonana CCMP1335]	44.28	0	sp|Q9XES1|ECA4_ARATH	Calcium-transporting ATPase 4, endoplasmic reticulum-type OS=Arabidopsis thaliana GN=ECA4 PE=2 SV=2	100	0	tr|B8BXK6|B8BXK6_THAPS	Calcium transporting ATPase OS=Thalassiosira pseudonana GN=THAPSDRAFT_268458 PE=4 SV=1	gi|220933028|ref|YP_002509936.1|	535	2e-174	COG0474	Magnesium-transporting ATPase (P-type)	P	Inorganic ion transport and metabolism	K01537|1|0.0|736|nnu:104594684| Ca2+-transporting ATPase [EC:3.6.3.8]	GO:0006754//ATP biosynthetic process;GO:0006812//cation transport	GO:0005388//calcium-transporting ATPase activity;GO:0046872//metal ion binding;GO:0005524//ATP binding	GO:0016021//integral component of membrane
242	XP_002292529.1	myosin light chain kinase [Thalassiosira pseudonana CCMP1335]	38440.8	0.067	2	4	EED90504.1	0.8	0.072	4	0.01584	XP_002292529.1	MGCSGSKPQTAGATPQAPKAAAKSATKKATFDGSYKRGKTLGEGAFSVVIEATKKDTDESYAVKVVTKSKLTKEDEVALKDEIAVLNELKHQHIIRLYEVFEEPSYYYLVTEQMRGGELFDRIVSKSYYNEKEARDVCKILFESIGFCHSKSVAHRDLKPENLLLRAEDNDSDIKIADFGFAKKVLTPNSLTTQCGTPGYVAPEILEGVPYDTKSDMWSLGVIIYILLGGYPPFIEQNQRELFRKIRKGQYEFHEEYWGSVSDDAKNLISSLLTVDPAKRLSASEALNHKWMVADGDKLAAQDLGTNLAELKKYNAKRKFKAAVNAVILANKLTSLGANFKDNL	100	0	gi|224007138|ref|XP_002292529.1|	myosin light chain kinase [Thalassiosira pseudonana CCMP1335]	45.51	4e-85	sp|Q9TXJ0|CMK1_CAEEL	Calcium/calmodulin-dependent protein kinase type 1 OS=Caenorhabditis elegans GN=cmk-1 PE=1 SV=1	100	0	tr|B8C8L4|B8C8L4_THAPS	Myosin light chain kinase OS=Thalassiosira pseudonana GN=MLK1 PE=3 SV=1	gi|171059620|ref|YP_001791969.1|	117	6e-28	COG0515	Serine/threonine protein kinase	T	Signal transduction mechanisms	K08794|1|9e-74|235|vcn:VOLCADRAFT_79621| calcium/calmodulin-dependent protein kinase I [EC:2.7.11.17]!K17530|3|8e-72|233|cre:CHLREDRAFT_140111| doublecortin-like kinase 3 [EC:2.7.11.1]	GO:0006468//protein phosphorylation	GO:0005524//ATP binding;GO:0004687//myosin light chain kinase activity;GO:0004683//calmodulin-dependent protein kinase activity	-
243	EED87694.1	polyadenlyte binding protein, partial [Thalassiosira pseudonana CCMP1335]	66785.5	0.075	2	4	XP_002294914.1	0.81	0.027	4	0.001107	EED87694.1	QQSANFSSASLYIGDLLPEVNEGFLFEIFNAVGPVASIRVCRDAVTRRSLGYAYVNYHQVADAERALDSMNFTEIKGKPCRIMWSQRDPSMRRSGVGNIFVKNLHEGIDNKQLYDTFSLFGNILSCKVVTDKATGLSKGYGYVHYETNEAAASAIEKLDGMLIDGKEVQVGVFMRRDNRPGQADWTNVFIKNIPFEWTEDKLREEFEGFGEVVSAKPKEVQGSLGFGFVNFATHEAAAAAVKEMNDKEFTVTEDGEEVTKVLFVGRAQKKAERERELRAKYEAEKIDRIAKFQGVNLYVKNLDDTVTDDVLRDEFSAMGTITSARVMKDLKTGISRGFGFVCYSTPEDATRAVNEMNGKIILGKPIFVALAQRRDVRRAQLEAQHNQGRGNLPGPMGGA…	100	0	gi|224012523|ref|XP_002294914.1|	polyadenlyte binding protein [Thalassiosira pseudonana CCMP1335]	57.14	9e-144	sp|P31209|PABP_SCHPO	Polyadenylate-binding protein, cytoplasmic and nuclear OS=Schizosaccharomyces pombe (strain 972 / ATCC 24843) GN=pab1 PE=1 SV=2	100	0	tr|B8CFU7|B8CFU7_THAPS	Polyadenylate-binding protein (Fragment) OS=Thalassiosira pseudonana GN=pabA PE=3 SV=1	gi|338175402|ref|YP_004652212.1|	75.5	9e-15	COG0724	RNA recognition motif (RRM) domain	J	Translation, ribosomal structure and biogenesis	K13126|1|2e-144|436|cvr:CHLNCDRAFT_59028| polyadenylate-binding protein		GO:0000166//nucleotide binding;GO:0003723//RNA binding	-
244	EJK74831.1	hypothetical protein THAOC_03470 [Thalassiosira oceanica]	60858	0.039	1	1	-	0.68	0.015	4	4.704e-05	EJK74831.1	MGDNLFPDSVKDFVFDLHDASRRSLIPSEQQGLYSGTFREVTAKYFPNVAWPEPSAIANECDNDALFLALYNELTLRHLQSVKRPSPRDRIEGWHAYSELFDLILQEAPSPGSAGGRETLYLLPEWCFDIMHEFLYQFQGFCQFRTQTYTSAAKASNDGGKAPPNHVQDALDALAQNSDAWAIGSVMRYLRRLVEVGTQGNASATYRFLAYFSSVTLSRLECLCGDYSASVKALDVIYDPDAEPVAVGEDMRSPEELVNGVFPARLSLAYHVGISYLMLRRYKDSARVLGGICLFMQRGFKTGQLRKIPGSEQFNKLYDRMIAILAILTHVCPAPVLDDSIASVVRDKHANNLSKIEAGEEGYEDMFCYACPKFINVAVPDYDVALQPGCPAIPYGQDA…	100	0	gi|397641750|gb|EJK74831.1|	hypothetical protein THAOC_03470 [Thalassiosira oceanica]	32.29	6e-73	sp|Q8AVJ0|EIF3L_XENLA	Eukaryotic translation initiation factor 3 subunit L OS=Xenopus laevis GN=eif3l PE=2 SV=1	100	0	tr|K0TKX1|K0TKX1_THAOC	Eukaryotic translation initiation factor 3 subunit L OS=Thalassiosira oceanica GN=THAOC_03470 PE=3 SV=1	-	-	-	-	-	-	-	K15029|1|8e-75|249|mus:103999692| translation initiation factor 3 subunit L	-	-	-
245	EJK70245.1	hypothetical protein THAOC_08407 [Thalassiosira oceanica]	21169	0.042	1	2	-	0.81	0.074	4	0.01908	EJK70245.1	MDAVKDAAHAQLAELRMKIDDNELLHSLEQKYNIPKERIVVGGVLVIFFAIAFGLTAASLCSIIGFAYPSYKSFEAIEKRTGSGGGPEVTQWLIYWVVFSFFSIIEVFVDTLLYWIPFYWAFKVAFLLWAMLPQTRGAKFLYDSFLKDFLRSNESKIDAALENASKTAASVAKEAKEVASNMGANLKSD	100	1e-111	gi|397631676|gb|EJK70245.1|	hypothetical protein THAOC_08407 [Thalassiosira oceanica]	39.86	6e-24	sp|Q5RE33|REEP5_PONAB	Receptor expression-enhancing protein 5 OS=Pongo abelii GN=REEP5 PE=2 SV=1	100	2e-110	tr|K0SY02|K0SY02_THAOC	Uncharacterized protein OS=Thalassiosira oceanica GN=THAOC_08407 PE=3 SV=1	-	-	-	-	-	-	-	K17279|1|5e-19|84.0|mus:103970598| receptor expression-enhancing protein 5/6	-	-	-
246	EJK71504.1	hypothetical protein THAOC_07047 [Thalassiosira oceanica]	27317.9	0.042	1	1	-	0.8	0.063	4	0.01005	EJK71504.1	MPKSKREKRVALTQTAKKTREHKTNYVETVREAIDGNDRIYLFSYENMRSNHFKDVRLHFRGGNKNDDIMTDDGDGDSSGEGRIFLGKNKLLQIALGRTPEDEYSDNLHQVSKNLTGSVGILCTTQSADDVEEYFSSLSVVDYARAGVLSPQTVRLTQKQVETHPVSMVELFRKLGLPVEVKNGRVSFIGERPEFEVCKEGKELSVEQCKILVHFGIKLSTFKISLVSRWEKSDGSVEEF	100	3e-168	gi|397634608|gb|EJK71504.1|	hypothetical protein THAOC_07047 [Thalassiosira oceanica]	40.42	7e-59	sp|A4FV84|MRT4_BOVIN	mRNA turnover protein 4 homolog OS=Bos taurus GN=MRTO4 PE=2 SV=1	100	7e-167	tr|K0T2V7|K0T2V7_THAOC	Ribosome assembly factor mrt4 OS=Thalassiosira oceanica GN=THAOC_07047 PE=3 SV=1	gi|289596536|ref|YP_003483232.1|	53.1	2e-06	COG0244	Ribosomal protein L10	J	Translation, ribosomal structure and biogenesis	K14815|1|5e-52|171|bna:106361936| mRNA turnover protein 4	GO:0042254//ribosome biogenesis		GO:0005840//ribosome
247	EJK50684.1	hypothetical protein THAOC_30285 [Thalassiosira oceanica]	61215.2	0.022	1	3	-	0.78	0.022	4	0.0003585	EJK50684.1	MSTSVTSAFRSSKRTTRCIVLGGGAVNAAHHQARADEGVELVTTAKKTTPDKIQTVARLGTLCTIEWAGERALDPAAALSHGGAARSLGRPSVVRPTAPNPHRLHGHRHHQPHACGCGGIAPKGRRQEADDRTAVGGIGQPAGTAIPREELTSNESVLEVPEIEVQPASDDLLSPRSKIIKKQGQHNMPTVAEELAALRARGGVKDRAANLQGGALSTPEAEAAALKAKKDAAKAGKQKATEILNKGGQGGGMSQELEYSLSQKEKRKQEQKQKDEAKQLLNKGGTVLVDTQQVIGKSNNKRDNSKPVATKSVPHEAGKGGEKAETVKSPAAKVQVQSSEVKESRPEPAGKSEPATSAAVKEEDDGDVPDLEEPSGKLEPVTPAAVEKNGDEAVPELED…	100	0	gi|397577743|gb|EJK50684.1|	hypothetical protein THAOC_30285 [Thalassiosira oceanica]	36.54	2e-25	sp|Q60817|NACA_MOUSE	Nascent polypeptide-associated complex subunit alpha OS=Mus musculus GN=Naca PE=1 SV=1	100	0	tr|K0REQ0|K0REQ0_THAOC	Uncharacterized protein OS=Thalassiosira oceanica GN=THAOC_30285 PE=4 SV=1	-	-	-	-	-	-	-	K03626|1|4e-24|103|ppp:PHYPADRAFT_110184| nascent polypeptide-associated complex subunit alpha	-	-	-
248	XP_002293741.1	predicted protein [Thalassiosira pseudonana CCMP1335]	115906	0.015	1	1	EED88750.1	0.5	0.151	4	0.01805	XP_002293741.1	MTTLPPSTTGVGAVFNTSLASQASLSAPQPRTSPVAHFSSVANDGVGNDTISDAAIGSGKDRGLITNGRLLAVNSTYVAYAVKKGLVRVIDRRTAAKTLLRGHGEQTRIVDAAFFGTEGSSQTKEGVAALWKDLSDQRKRQQGQNVNGGNGQANTPVPPSGASDILATVGGMQDEACVLIWRIYGGTHTEEMGADKIFELKFPLAARIVWHPFNPNKFMLLHRNVHDEESSDKCRSVATMAETTRLVTTRHQSDGHGICDCKDGKVPGAVQFVVSDAVGASQAGANDVAWSNKDARHVLTAHDDGIVRLWDVTLPVTSVNPETGRVGEEGPNNSTSFQCISQLNVASVNASISKSRQVTRVLFLSQYESELSGSTSSITPPIITGTDMNHTITLWSAFS…	100	0	gi|224009566|ref|XP_002293741.1|	predicted protein [Thalassiosira pseudonana CCMP1335]	-	-	-	-	100	0	tr|B8CCC9|B8CCC9_THAPS	Uncharacterized protein OS=Thalassiosira pseudonana GN=THAPSDRAFT_24835 PE=4 SV=1	-	-	-	-	-	-	-	K12616|1|2e-15|85.5|csl:COCSUDRAFT_39670| enhancer of mRNA-decapping protein 4	-	-	-
249	EJK74825.1	hypothetical protein THAOC_03479 [Thalassiosira oceanica]	25325.4	0.149	1	1	-	0.8	0.105	4	0.0382	EJK74825.1	MNIHSQHQSLAQYDAYHGKSAETRHLKPGELSTGTTIMAVAFEGGVVLCADSRVSTGTYVANRASDKIAQLHDHIWCCRSGSAADTQALTDYVRHYLAQLAVETGRPPEVKVAAHLMRRLCYENKDNLMAGVIVGGWDPVNGGSVFNIPLGGSMIPMPFAIGGSGSTFIYGLVDSEFKENMSEEDALALVKKAVSHAMARDGSSGGIVRTVVATEDGNTRDYISGNRLPYGPAGW	100	6e-177	gi|397641738|gb|EJK74825.1|	hypothetical protein THAOC_03479 [Thalassiosira oceanica]	57.36	4e-80	sp|Q8LD27|PSB6_ARATH	Proteasome subunit beta type-6 OS=Arabidopsis thaliana GN=PBA1 PE=1 SV=2	100	2e-175	tr|K0TBE9|K0TBE9_THAOC	Proteasome subunit beta type OS=Thalassiosira oceanica GN=THAOC_03479 PE=3 SV=1	gi|385806007|ref|YP_005842405.1|	110	4e-28	COG0638	20S proteasome, alpha and beta subunits	O	Posttranslational modification, protein turnover, chaperones	K02738|1|4e-87|260|ccp:CHC_T00008406001| 20S proteasome subunit beta 1 [EC:3.4.25.1]	GO:0051603//proteolysis involved in cellular protein catabolic process	GO:0004298//threonine-type endopeptidase activity	GO:0005737//cytoplasm;GO:0005839//proteasome core complex;GO:0005634//nucleus
250	EJK60029.1	hypothetical protein THAOC_19689 [Thalassiosira oceanica]	126479	0.048	2	2	-	0.35	0.132	4	0.01046	EJK60029.1	MCLSAAVMGSRGSLSYLRYQTTERDFYVSAPLLTHFNIHSGKNKRLTKSKKGSKKKAVDPFLKKDWYKLIAPSIFSQKECGKTIITRTQGQKIASEGLKGRVIELSLGDLNQNEASSYRKIKLCVEDVQGFNCLLNFHGMDMTRDKLCSLIKKKQSIIEANVDARTTDGYIVRMFCIAFTKKQDDQLKETCYAKSAKERSIRAKMVSTMATLAGKGDLKTLVKALVAGTTGDEIVREASSIFPIKDCYIRKVKVIKKPKFDVTALMEWHNDDGQDVGQNVAPAVAEETVAGSGGRLSRVQTAHEDENGVKGQAEDLTYSTMFGDPSSPLTWEILSRLAGASTSSSGEARPFYVQRAGPGGEEPRVDEDEQFFFADPLGSASAASLSVCSRDTASERLLR…	100	0	gi|397608572|gb|EJK60029.1|	hypothetical protein THAOC_19689 [Thalassiosira oceanica]	57.26	9e-81	sp|Q285L8|RS3A_TOBAC	40S ribosomal protein S3a OS=Nicotiana tabacum GN=cyc07 PE=2 SV=1	100	0	tr|K0S574|K0S574_THAOC	40S ribosomal protein S3a OS=Thalassiosira oceanica GN=THAOC_19689 PE=3 SV=1	gi|330509087|ref|YP_004385515.1|	102	1e-22	COG1890	Ribosomal protein S3AE	J	Translation, ribosomal structure and biogenesis	K02984|1|2e-81|270|sly:101260518| small subunit ribosomal protein S3Ae	GO:0006412//translation	GO:0003735//structural constituent of ribosome	GO:0005840//ribosome
251	EJK76680.1	hypothetical protein THAOC_01544, partial [Thalassiosira oceanica]	21988.7	0.041	1	2	EJK61761.1	0.45	0.121	4	0.009086	EJK76680.1	MSNKLNSAILDKAAEDVLAFSSGETINKNGADLQGKKRNFVETVEIQITLKNYDPQRDKRFSGTFKLPSIPRPNLKPCMLGNAAHCEQADRIGVAHMSVDDLKKLNKNKKLVKKLAKKYDFFLASDNMIKQIPRLLGPGLTKAGKFPTLLSSSDDMQEKIDEIKATIKFQMKKVMVLNVAIGNVDMEKQQIIVNTQ	100	1e-127	gi|397645072|gb|EJK76680.1|	hypothetical protein THAOC_01544, partial [Thalassiosira oceanica]	63.01	4e-64	sp|Q8VZB9|R10A1_ARATH	60S ribosomal protein L10a-1 OS=Arabidopsis thaliana GN=RPL10AA PE=1 SV=1	100	3e-126	tr|K0TH30|K0TH30_THAOC	Uncharacterized protein (Fragment) OS=Thalassiosira oceanica GN=THAOC_01544 PE=4 SV=1	gi|57641352|ref|YP_183830.1|	85.5	5e-19	COG0081	Ribosomal protein L1	J	Translation, ribosomal structure and biogenesis	K02865|1|3e-65|203|sind:105171044| large subunit ribosomal protein L10Ae	GO:0006412//translation	GO:0003735//structural constituent of ribosome;GO:0003723//RNA binding	GO:0009506//plasmodesma;GO:0005886//plasma membrane;GO:0022625//cytosolic large ribosomal subunit
252	EJK74434.1	hypothetical protein THAOC_03888 [Thalassiosira oceanica]	32132.8	0.028	1	4	-	0.69	0.094	4	0.01181	EJK74434.1	MCDESCTPAPDPEAGQDGNGKQQLTDEERMLKEISDQKDLIDAISRDTFDNKAQRALHQKKLGQLEFKYHLLVEKKRLARTMSKFEELHGALYSEPCMICLDDVHLNASESLTIALTCCGGFICKTCYREFMNSGVDLGQCPLCRATQSSTEAEAAVQCMALAERGVSWAQSNVGRCMIPGRIGFKKQEEAGLKWVEKAAAQNDPSALHYLSSLYRDGLTSVLDKSQEKANELMIKSANLGYASANSLVWLYFTSMGRMVLERIERRLTAEPLLPLLSMTQIA	100	0	gi|397641017|gb|EJK74434.1|	hypothetical protein THAOC_03888 [Thalassiosira oceanica]	-	-	-	-	100	0	tr|K0TBB5|K0TBB5_THAOC	Uncharacterized protein OS=Thalassiosira oceanica GN=THAOC_03888 PE=4 SV=1	gi|189502556|ref|YP_001958273.1|	53.1	4e-06	COG0790	TPR repeat	T	Signal transduction mechanisms	-	-	-	-
253	EJK52343.1	hypothetical protein THAOC_28390 [Thalassiosira oceanica]	17999.4	0.094	2	3	YP_009093193.1;YP_874549.1;ABK20772.1;ADB27512.1;XP_002297529.1;AIR75450.1;AIR75591.1;YP_009093466.1;EJK54219.1;YP_004072558.1;AIR76139.1;sp|A0T0T7.1|PETD_THAPS;EED86169.1;EJK55855.1;AIR75866.1	0.64	0.064	4	0.002912	EJK52343.1	MSIIKKPDLTDPKLRAKLAKGMGHNYYGEPAWPNDLLYLFPVCILGTFACCIGLAVMAPTQMGEPADPFNTPLEILPEWYFFPTFNLLRVLPNKLLGVLAMAAVPAGLITVPFIENVNKFQNPFRRPIASLVFIFGFFFAVWFGIGACLPIDKAVSLGYW	98.75	5e-99	gi|118411155|ref|YP_874549.1|	cytochrome b6-f complex subunit IV [Thalassiosira pseudonana]	98.75	8e-100	sp|A0T0T7|PETD_THAPS	Cytochrome b6-f complex subunit 4 OS=Thalassiosira pseudonana GN=petD PE=3 SV=1	98.75	1e-97	tr|B8LES7|B8LES7_THAPS	Cytochrome b6-f complex subunit 4 OS=Thalassiosira pseudonana GN=petF_2 PE=3 SV=1	gi|440680406|ref|YP_007155201.1|	253	6e-86	COG1290	Cytochrome b subunit of the bc complex	C	Energy production and conversion	K02637|1|4e-83|246|olu:OSTLU_32458| cytochrome b6-f complex subunit 4	GO:0009767//photosynthetic electron transport chain;GO:0022904//respiratory electron transport chain	GO:0016491//oxidoreductase activity;GO:0045156//electron transporter, transferring electrons within the cyclic electron transport pathway of photosynthesis activity;GO:0045158//electron transporter, transferring electrons within cytochrome b6/f complex of photosystem II activity	GO:0016021//integral component of membrane;GO:0009535//chloroplast thylakoid membrane
254	XP_002295475.1	valyl-tRNA synthetase [Thalassiosira pseudonana CCMP1335]	112917	0.033	3	3	ACI64192.1	0.63	0.081	4	0.0054	XP_002295475.1	MADAYHPEAVESAWQDWWEASGFYSCDPSTAIAKPDSEKFVMVIPPPNVTGSLHLGHALTAAVEDTLTRWHRMKGHATLYIPGTDHAGIATQSVVEKMIMKQSNQTRHDLGREAFISKVWEWKSEYGNRITTQLRRLGSSVDWSRERFTMDDMCSKAVVEAFNRFHEDGLLYRAERLGNWSCALKSAISDIEVDYIDLDGRTFLEVKTHKGNKNDAKGRYEFGVLTSFAYPIEDSEEQLVVATTRLETMLGDTAVAIHPEDPRYTHLHGKCVVHPFNGRKIPIVCDKELVDMSFGTGAVKITPAHDPNDYECGKRHNLEFITVLTPDGAINHNGSQFEGMMRYDARIAVEEALKEKGLYKGKEPNKMRLGLCSRSGDILEPMITPQWYVNCSDMAKRST…	100	0	gi|224011401|ref|XP_002295475.1|	valyl-tRNA synthetase [Thalassiosira pseudonana CCMP1335]	52.38	0	sp|Q86KU2|SYVC_DICDI	Probable valine--tRNA ligase, cytoplasmic OS=Dictyostelium discoideum GN=valS1 PE=3 SV=1	100	0	tr|B5YM58|B5YM58_THAPS	Valyl-tRNA synthetase OS=Thalassiosira pseudonana GN=VTS1 PE=3 SV=1	gi|78485844|ref|YP_391769.1|	754	0	COG0525	Valyl-tRNA synthetase	J	Translation, ribosomal structure and biogenesis	K01873|1|0.0|1050|mis:MICPUN_96323| valyl-tRNA synthetase [EC:6.1.1.9]	GO:0006438//valyl-tRNA aminoacylation;GO:0006450//regulation of translational fidelity	GO:0004832//valine-tRNA ligase activity;GO:0002161//aminoacyl-tRNA editing activity;GO:0005524//ATP binding	GO:0005737//cytoplasm
255	YP_009093249.1	ribosomal protein S11 (chloroplast) [Roundia cardiophora]	13802.4	0.185	2	7	AIR75506.1;AIR75647.1;AIR75922.1	0.45	0.175	4	0.02538	YP_009093249.1	MAQKIRKSTVKKNRSNLGTGVVHIQSTFNNTIVTITNITGDTISWASSGSSGFKGARKGTPFAAQTAAEKAALEALSTGIKTVEILVKGQGSGRETAIRSIEGAGLEILSIQDITPVPHNGCRPRKRRRV	98.46	8e-62	gi|700082724|ref|YP_009093522.1|	ribosomal protein S11 (chloroplast) [Thalassiosira weissflogii]	94.62	3e-59	sp|A0T0Z3|RR11_THAPS	30S ribosomal protein S11, chloroplastic OS=Thalassiosira pseudonana GN=rps11 PE=3 SV=1	98.46	2e-60	tr|A0A089VPD1|A0A089VPD1_THAWE	30S ribosomal protein S11, chloroplastic OS=Thalassiosira weissflogii GN=rps11 PE=3 SV=1	gi|428777703|ref|YP_007169490.1|	182	7e-59	COG0100	Ribosomal protein S11	J	Translation, ribosomal structure and biogenesis	K02948|1|4e-28|103|ppp:PhpapaCp061| small subunit ribosomal protein S11		GO:0003723//RNA binding	GO:0030529//ribonucleoprotein complex;GO:0009536//plastid
256	XP_002296651.1	chloride channel protein 7, partial [Thalassiosira pseudonana CCMP1335]	75712.8	0.031	2	3	EED87046.1	0.68	0.141	4	0.03087	XP_002296651.1	LKRWGLTLVVGVLQAMIATTCNMASRRLGSMKYDHVYALGGMDDYVDGNGANSPFLAFLFYQTVFALAASLFVYIEPVAAGSGIPEVKCFLNGIDLPRIVRFKTLVCKVVGVTFSVAAGLPVGKEGPMVHSGSVVAAGISQGRTKFWGVDTSFSKFSDFRNDREKRDFVACGAAAGVASAFGAPIGGVLFSLEEGASYWSTKLTWRAFFCAMITLGTAFMIRNQDSKWGQANVDKLFSFGEFTAIGEGTINFSVWELLLFILIGCLGGLIGAVFNAGNEHLTIWRMKHVNFSKKRRVVEVVVMSLIVTTVSFVMPLLWNRCTELPTDMQDWTNQEKELPGKEYNEVASLFFCEADAAIRQLFHFRETGETDTSTFSSAALFLFFIPYITLASLVYGIAV…	100	0	gi|224013975|ref|XP_002296651.1|	chloride channel protein 7 [Thalassiosira pseudonana CCMP1335]	42.71	7e-142	sp|O70496|CLCN7_MOUSE	H(+)/Cl(-) exchange transporter 7 OS=Mus musculus GN=Clcn7 PE=1 SV=1	100	0	tr|B8LCA7|B8LCA7_THAPS	Chloride channel protein (Fragment) OS=Thalassiosira pseudonana GN=THAPSDRAFT_263848 PE=3 SV=1	gi|307153055|ref|YP_003888439.1|	125	7e-28	COG0589	Nucleotide-binding universal stress protein, UspA family	T	Signal transduction mechanisms	K05016|1|1e-97|321|sita:101764449| chloride channel 7	GO:0055085//transmembrane transport;GO:0006821//chloride transport	GO:0005247//voltage-gated chloride channel activity	GO:0016021//integral component of membrane
257	EED93501.1	the t-complex beta chaperonin-like protein, partial [Thalassiosira pseudonana CCMP1335]	56536	0.068	3	7	XP_002289964.1;EJK75596.1	0.56	0.03	4	0.0002089	EED93501.1	QGENARLSSFVGAIAIADLVKTTLGPKGMDKILQRISEHDQSISVTNDGATILKSVNLDNAAAKVLVDIARVQDDEVGDGTTSVAVLCGELLREAEDLINQRIHPQTIAEGWRLARKAAREALEQSAIDNSADETKFRDDLFRIARTTLSSKLLTYEKEYFANLAVDAVMRLRGSNNLDHIQVLKKPGGHLRDSYLEEGFLLDKKIGVGQPKRIENAKILLANTSMDTDKIKIYGSRVRVDSLNKVAEIEEAEKDRMRQKCEKIISHGCNVFINRQLIYNLPESIFTERGVMAIEHADFDGIERLAAVTGGEVVSTFDRPDLVTMGECDVVEEVMIGEDKVIRLGGCKSGEACSIVLRGASSHVLDEAERSLHDALCILTATVKEPRIICGGGCTEILM…	100	0	gi|224000583|ref|XP_002289964.1|	the t-complex beta chaperonin-like protein [Thalassiosira pseudonana CCMP1335]	65.29	0	sp|Q54ES9|TCPB_DICDI	T-complex protein 1 subunit beta OS=Dictyostelium discoideum GN=cct2 PE=1 SV=1	100	0	tr|B8C0D6|B8C0D6_THAPS	The t-complex beta chaperonin-like protein (Fragment) OS=Thalassiosira pseudonana GN=THAPSDRAFT_33432 PE=3 SV=1	gi|118431718|ref|NP_148364.2|	339	5e-109	COG0459	Chaperonin GroEL (HSP60 family)	O	Posttranslational modification, protein turnover, chaperones	K09494|1|0.0|723|bpg:Bathy01g05540| T-complex protein 1 subunit beta	GO:0006457//protein folding	GO:0051082//unfolded protein binding;GO:0005524//ATP binding	GO:0005737//cytoplasm
258	EJK50611.1	hypothetical protein THAOC_30354, partial [Thalassiosira oceanica]	5012.51	0.261	1	5	EJK48626.1;EJK72485.1	0.49	0.009	4	5.028e-06	EJK50611.1	MGFSRYVEVGRVVYINYGADAGKIATVIDIVDQNKCLVDGPEEITG	100	2e-27	gi|397636985|gb|EJK72485.1|	hypothetical protein THAOC_05982 [Thalassiosira oceanica]	59.52	1e-14	sp|Q9T043|RL142_ARATH	60S ribosomal protein L14-2 OS=Arabidopsis thaliana GN=RPL14B PE=1 SV=1	100	5e-26	tr|K0T455|K0T455_THAOC	Uncharacterized protein OS=Thalassiosira oceanica GN=THAOC_05982 PE=4 SV=1	-	-	-	-	-	-	-	K02875|1|2e-14|65.1|ath:AT4G27090| large subunit ribosomal protein L14e	GO:0001510//RNA methylation;GO:0006412//translation;GO:0042254//ribosome biogenesis	GO:0003735//structural constituent of ribosome	GO:0005730//nucleolus;GO:0009506//plasmodesma;GO:0005774//vacuolar membrane;GO:0009507//chloroplast;GO:0022625//cytosolic large ribosomal subunit;GO:0005783//endoplasmic reticulum;GO:0005794//Golgi apparatus
259	EED93170.1	predicted protein [Thalassiosira pseudonana CCMP1335]	106933	0.011	1	1	XP_002289633.1;EJK74252.1	0.63	0.07	4	0.003457	EED93170.1	MAAQAKSSTTTQPSDYLLNLVWIGAILYGIGFFLQNAYIIRLQAIEEFGPVIHEFDPYFNWRATQYLYENGAKKFFQWFDHKVWYPLGRPVGTTIYPGMQFTAVFLKNYIFGEKMSLNDICCYIPAWFGVAATFLVGCIAYEASLDSNNMSIFGVMIDALKGRYNDGTSGSAVATNGYYSRANKFGLSSPALECAVFAMGFMAVVPAHLMRSVGGGYDNESVAVTAMSLTFYLWMRSLRSGEKNNYLFGILAGIAYFYMVAAWGGYIFVLNLIGAHAALLVLLGRFTTKVYLSYTLFYVVGTSLAIQVPVVGWMPLKSLEQMAPCLVFLGYQALQYCEFMRKKNKMTRREAWKFRVKVFAAGLVVACVLVATMTPKGYFGPISSRVRGLFVPHTKTGNP…	100	0	gi|223999921|ref|XP_002289633.1|	predicted protein [Thalassiosira pseudonana CCMP1335]	33.14	6e-108	sp|P46975|STT3_CAEEL	Dolichyl-diphosphooligosaccharide--protein glycosyltransferase subunit stt-3 OS=Caenorhabditis elegans GN=stt-3 PE=1 SV=1	100	0	tr|B8C135|B8C135_THAPS	Uncharacterized protein OS=Thalassiosira pseudonana GN=THAPSDRAFT_4160 PE=4 SV=1	gi|557694095|ref|YP_008797149.1|	166	7e-41	COG1287	Asparagine N-glycosylation enzyme, membrane subunit Stt3	O	Posttranslational modification, protein turnover, chaperones	K07151|1|0.0|634|mpp:MICPUCDRAFT_691| dolichyl-diphosphooligosaccharide--protein glycosyltransferase [EC:2.4.99.18]	GO:0006486//protein glycosylation	GO:0004576//oligosaccharyl transferase activity	GO:0016020//membrane
260	AIR75420.1	ribosomal protein L12 (chloroplast) [Cyclotella sp. L04_2]	13482.2	0.141	1	5	AIR75561.1	0.48	0.155	4	0.01748	AIR75420.1	MSEKITQIVEELKTLTLLEASELVAAIEETFGVDASASVGGNIVMAAAPAAVEEVEEKTEFNVMLDEVPADKKIAVLKVVRTLTGLGLKEAKELVESTPKVIQEALGKEAAEDAKKQIEDAGGKVSLT	100	1e-71	gi|691189906|gb|AIR75420.1|	ribosomal protein L12 (chloroplast) [Cyclotella sp. L04_2]	91.41	3e-64	sp|A0T0Q7|RK12_THAPS	50S ribosomal protein L12, chloroplastic OS=Thalassiosira pseudonana GN=rpl12 PE=3 SV=1	100	3e-70	tr|A0A089VM10|A0A089VM10_9STRA	50S ribosomal protein L12, chloroplastic OS=Cyclotella sp. L04_2 GN=rpl12 PE=3 SV=1	gi|428307481|ref|YP_007144306.1|	161	1e-50	COG0222	Ribosomal protein L7/L12	J	Translation, ribosomal structure and biogenesis	K02863|1|1e-29|114|gsl:Gasu_40200| large subunit ribosomal protein L1!K02935|2|5e-27|102|sly:101253247| large subunit ribosomal protein L7/L12	GO:0006412//translation	GO:0003735//structural constituent of ribosome	GO:0005840//ribosome;GO:0009507//chloroplast
261	XP_002286821.1	HSP90 domain-containing protein [Thalassiosira pseudonana CCMP1335]	84196.8	0.024	2	2	EED96462.1	0.69	0.142	4	0.03253	XP_002286821.1	MVQLQLATAASRAALSHHARKASSRLVNSARQYHGQSRSLSFISLSNTTCARHHRRPSARQQLQIPATFQASPLSTSADSSTEDTKEQLEFQAETRQLLDIVTHSLYTDKEVFLRELVSNASDALEKLRHLQASGTLSSSDDTPLEIRITTDEAANTLTITDTGIGMSREEMMSNLGTIARSGSKAFVKEMQMQSQLDADKVTDPFGNGIIGKFGVGFYSGFMVSDKVDVRSKSAGKIGENSSGSDDEDALVWESTGTGSYSISPLSEDIRQDRGTSVVLHLRPELSQYSNESTIETILKKYSNFVGFPIFLNGKRVNTIDAIWLHDPKEVDDEKHSAFYKYISHMYDEPLSKLHFRMDAPIDIKALFYIPSFHQEKYGMGRMDPGVSLYSRKILIEAK…	100	0	gi|223994275|ref|XP_002286821.1|	HSP90 domain-containing protein [Thalassiosira pseudonana CCMP1335]	43.81	0	sp|Q86L04|TRAP1_DICDI	TNF receptor-associated protein 1 homolog, mitochondrial OS=Dictyostelium discoideum GN=trap1 PE=2 SV=1	100	0	tr|B8BR34|B8BR34_THAPS	HSP90 domain-containing protein OS=Thalassiosira pseudonana GN=THAPSDRAFT_39149 PE=3 SV=1	gi|182413826|ref|YP_001818892.1|	553	0	COG0326	Molecular chaperone, HSP90 family	O	Posttranslational modification, protein turnover, chaperones	K09488|1|1e-160|484|olu:OSTLU_26010| TNF receptor-associated protein 1	GO:0006457//protein folding;GO:0006950//response to stress	GO:0051082//unfolded protein binding;GO:0005524//ATP binding	GO:0005737//cytoplasm
262	XP_002289727.1	predicted protein [Thalassiosira pseudonana CCMP1335]	35913.3	0.036	1	1	EED93264.1	0.62	0.195	4	0.04922	XP_002289727.1	MNLISLLALLLVNIDFATALQLASGTSEVSRRSALTQLVSSSAAAATTSLWLPPSACNANAAETTAVTLNSGNKKVFPLASFGLQIYSDDVAYDLTLTALEVGYRNFFASVLAGNQKGFAKAVRASGIPREELYICGTVLSNRVNGEVAAYRKTKQGCLENMAAMANGDITKLDMIMLDYPGPNDESIQGQWRAFEEMKSDLTVSDLAVSNFSPTQLDAILAINGATKPAVNQLPFSVAYHPQGILEYNAKRDILVQSWSPLSRVLPKYGSVLASIGKQYGKSAAQVGLRWIVQSGAAFSTQSKSKSHFEEDLAVFDFSLTEEEMNKITQLAA	100	0	gi|224000109|ref|XP_002289727.1|	predicted protein [Thalassiosira pseudonana CCMP1335]	28.93	2e-31	sp|Q4DJ07|PGFS_TRYCC	Prostaglandin F synthase OS=Trypanosoma cruzi (strain CL Brener) GN=Tc00.1047053511287.49 PE=1 SV=2	100	0	tr|B8BZ07|B8BZ07_THAPS	Uncharacterized protein OS=Thalassiosira pseudonana GN=THAPSDRAFT_22197 PE=4 SV=1	gi|271969155|ref|YP_003343351.1|	142	1e-38	COG0656	Aldo/keto reductase, related to diketogulonate reductase	Q	Secondary metabolites biosynthesis, transport and catabolism	K19642|1|7e-25|105|fve:101312822| D-galacturonate reductase [EC:1.1.1.365]!K00011|5|8e-23|100|cmo:103490340| aldehyde reductase [EC:1.1.1.21]	GO:0055114//oxidation-reduction process	GO:0016491//oxidoreductase activity	-
263	EJK46770.1	hypothetical protein THAOC_34544 [Thalassiosira oceanica]	120797	0.007	1	1	-	0.56	0.119	4	0.01122	EJK46770.1	MVDGRAGGLLWAALKSSRAGPARPATSQKDPAHKKNSLAEKMLLQLIAAEIAASFLMATLSSSFTFTQPQRSNGIGRQNDGKFDEGVHPSLMPSSPCNKKRPLISSLASTAARDVDNFDTQQGDESQSVLYEKVIRIPKQSHTFLIQLITYVQTMYELPPNLPMPFELRVPDDASEDDDGCATSANRAVLTIESPLGSCLEVEIVGIYIDEVVQSGPSMAMSLDRGLQDLEEGRVSVPISDSIDEKIADIVDDDEVDAAMKRLGYRNAVDSASKLPVQDAIIERDGLGNAIIESGHTDAQESTREAQLPRKGSTTTTRNDAPVEKSGKRVDKANRATSPISSGEDYAVQMAKRRAEAMMETVRASTSTSSADRTVAISGGESDFAVEAAKRAAAKRLRS…	100	0	gi|397569478|gb|EJK46770.1|	hypothetical protein THAOC_34544 [Thalassiosira oceanica]	-	-	-	-	100	0	tr|K0R3C4|K0R3C4_THAOC	Uncharacterized protein OS=Thalassiosira oceanica GN=THAOC_34544 PE=4 SV=1	-	-	-	-	-	-	-	-	-	-	-
264	YP_009093505.1	ribosomal protein S19 (chloroplast) [Thalassiosira weissflogii]	10420.7	0.174	2	2	AIR75905.1;AIR76178.1;YP_009093232.1	0.35	0.191	4	0.02605	YP_009093505.1	MSRSLKKGPFVAYHLLKKINKMNAEGKKDIITTWSRSSTILPNMVGFTIAVYNGKQHVPIFISDQLVGHKLGEFVSTRTFKSHIKADKKTKR	100	1e-62	gi|700082707|ref|YP_009093505.1|	ribosomal protein S19 (chloroplast) [Thalassiosira weissflogii]	95.65	3e-62	sp|A0T0X6|RR19_THAPS	30S ribosomal protein S19, chloroplastic OS=Thalassiosira pseudonana GN=rps19 PE=3 SV=1	100	3e-61	tr|A0A089VQH3|A0A089VQH3_THAWE	30S ribosomal protein S19, chloroplastic OS=Thalassiosira weissflogii GN=rps19 PE=3 SV=1	gi|434388537|ref|YP_007099148.1|	147	3e-46	COG0185	Ribosomal protein S19	J	Translation, ribosomal structure and biogenesis	K02965|1|1e-44|142|cre:ChreCp013| small subunit ribosomal protein S19	GO:0006412//translation	GO:0003735//structural constituent of ribosome;GO:0019843//rRNA binding	GO:0015935//small ribosomal subunit;GO:0009507//chloroplast;GO:0005739//mitochondrion
265	XP_002294496.1	26S proteasome regulatory subunit 3, partial [Thalassiosira pseudonana CCMP1335]	36865.7	0.046	1	2	EED88330.1	0.61	0.094	4	0.007219	XP_002294496.1	YCILFTQNCNRNYETSEELAGRHRMAVLRNDGDVMCVVLNLMLRDLLEGDQVEQAQKLLSNSTFPTEAPPSNNQLIRYLYYSGRIQALRLEYTQSYSNLSQALRKSPTNTALGFRIAIQRSLVVVQLLMGEIPERSVFFGEGMQGEMKPYLEIAQAVRRGDLGNFHVTVTKHAERFKLDGMYTLISRLAHSVVKAGLRKLKSSYSRISLVDVAVRLGLPSATSAEFVVAKAVRDGVIDATIDHEEGYVQSHDLVDVYATVEPSEAFHRRIAYCLTTHNDAVRGMRYHEDAYKRQLEASRGLKKRGGDAKTDEDLAAELEDMDEDY	100	0	gi|224011078|ref|XP_002294496.1|	26S proteasome regulatory subunit 3 [Thalassiosira pseudonana CCMP1335]	47.21	6e-95	sp|O42897|RPN3_SCHPO	Probable 26S proteasome regulatory subunit rpn3 OS=Schizosaccharomyces pombe (strain 972 / ATCC 24843) GN=rpn3 PE=3 SV=2	100	0	tr|B8CE75|B8CE75_THAPS	26S proteasome regulatory subunit 3 (Fragment) OS=Thalassiosira pseudonana GN=RPN3 PE=4 SV=1	-	-	-	-	-	-	-	K03033|1|1e-91|286|ccp:CHC_T00007173001| 26S proteasome regulatory subunit N3	GO:0042176//regulation of protein catabolic process;GO:0050790//regulation of catalytic activity	GO:0030234//enzyme regulator activity	GO:0000502//proteasome complex
266	EED94570.1	RS18, ribosomal protein 18 40S small ribosomal subunit [Thalassiosira pseudonana CCMP1335]	17244.2	0.205	3	9	XP_002287127.1	0.42	0.105	4	0.005631	EED94570.1	MSMSMMQGPEFQHILRILNTNVEGKRNVVFGLTKIKGLGRRFADLICKKAEIDVNKRAGELTADEIEKLVAIIQNPRQFKIPLWFLNRQKDFKTGKYSQVFAQNFDAKLRDDIERMKKIRAHRGLRHWWGIRVRGQHTCSTGRRKH	100	9e-106	gi|223994887|ref|XP_002287127.1|	RS18, ribosomal protein 18 40S small ribosomal subunit [Thalassiosira pseudonana CCMP1335]	68.31	2e-73	sp|P34788|RS18_ARATH	40S ribosomal protein S18 OS=Arabidopsis thaliana GN=RPS18A PE=1 SV=1	100	2e-104	tr|B8BTA9|B8BTA9_THAPS	RS18, ribosomal protein 18 40S small ribosomal subunit OS=Thalassiosira pseudonana GN=RS18 PE=3 SV=1	gi|294495901|ref|YP_003542394.1|	127	1e-36	COG0099	Ribosomal protein S13	J	Translation, ribosomal structure and biogenesis	K02964|1|7e-75|223|pop:POPTR_0005s23280g| small subunit ribosomal protein S18e	GO:0006412//translation	GO:0003735//structural constituent of ribosome;GO:0003723//RNA binding	GO:0005730//nucleolus;GO:0005773//vacuole;GO:0005886//plasma membrane;GO:0005618//cell wall;GO:0022627//cytosolic small ribosomal subunit
267	EJK57197.1	hypothetical protein THAOC_22787, partial [Thalassiosira oceanica]	15060.8	0.145	2	3	EED94991.1;XP_002287548.1	0.65	0.093	4	0.008498	EJK57197.1	MAPRLSFCPFSLALFAGLAVCSVSSLRRRRRRSSADDGDATFRVVFVLGGPGAGKGTQCDLLRERLGWSHLSAGDLLRAERRKAGSELAEVINSNIAAGRIVPSEITCSLIHAAMVELRASEGRTRFLIDGFPRSEGN	100	4e-83	gi|397598306|gb|EJK57197.1|	hypothetical protein THAOC_22787, partial [Thalassiosira oceanica]	60.42	2e-33	sp|Q28H12|KCY_XENTR	UMP-CMP kinase OS=Xenopus tropicalis GN=cmpk1 PE=2 SV=2	100	9e-82	tr|K0SF30|K0SF30_THAOC	Uncharacterized protein (Fragment) OS=Thalassiosira oceanica GN=THAOC_22787 PE=3 SV=1	gi|32475430|ref|NP_868424.1|	97.8	2e-23	COG0563	Adenylate kinase or related kinase	F	Nucleotide transport and metabolism	K13800|1|1e-30|112|mus:103981207| UMP-CMP kinase [EC:2.7.4.- 2.7.4.14]	GO:0006139//nucleobase-containing compound metabolic process	GO:0016776//phosphotransferase activity, phosphate group as acceptor;GO:0019201//nucleotide kinase activity	-
268	XP_002290887.1	eukaryotic translation initiation factor 3 subunit 8, partial [Thalassiosira pseudonana CCMP1335]	83295.9	0.03	2	2	EED92639.1	0.39	0.089	4	0.003665	XP_002290887.1	MESDSDSEDSVRIVKSAKTRAFETFQTHVTALRNAMKNSDHVKLMSEFDLLSKKMTKSQKVFDSNGGIPRFLVRMLCDLEDHVQKSLADKASFKKLKPAAGRALNRMKLTLKKFNEPYKGIMEEYRKNPVVSESGSDDSDDDKSDDESSKEAARAKAISEEAKDASSKALIAEENLNPSAIQKKTMEIVSSRGRKGTDNAALLRQLEALSELAERFGPRVEIPVLMHVITAQFDLQRTIDDYMETPAWKSCAGYLSRIGAILDDEKEGWKIGAMTGEDEELASDLMISAAMGKSEFKTVRVPGSLSLFLSRLDEEYNKSLQRISPHSVDYVLRLRDEATLCDLLTVFQRYYERVDSPSDAATLAELRVEHLYYRHDSIAVAVEKAANLQEGNDTSPPSD…	100	0	gi|224002430|ref|XP_002290887.1|	eukaryotic translation initiation factor 3 subunit 8 [Thalassiosira pseudonana CCMP1335]	40.46	2e-147	sp|O49160|EIF3C_ARATH	Eukaryotic translation initiation factor 3 subunit C OS=Arabidopsis thaliana GN=TIF3C1 PE=1 SV=2	100	0	tr|B8C3Y2|B8C3Y2_THAPS	Eukaryotic translation initiation factor 3 subunit 8 (Fragment) OS=Thalassiosira pseudonana GN=THAPSDRAFT_28441 PE=3 SV=1	-	-	-	-	-	-	-	K03252|1|1e-156|481|csl:COCSUDRAFT_30938| translation initiation factor 3 subunit C	GO:0006413//translational initiation	GO:0003743//translation initiation factor activity	GO:0005852//eukaryotic translation initiation factor 3 complex
269	XP_002293459.1	multispanning membrane protein [Thalassiosira pseudonana CCMP1335]	73289.3	0.037	2	3	EED89195.1	0.83	0.086	4	0.03256	XP_002293459.1	MMKALLASLLLQGAHGFYLPGVNPYSFTEGEVVKLKVNKMTSQKTLLPVDYYRLPFCQPPGGPKMDHENLGEFLAGDRIESSPYRLNFKVDMYCEQVCITNLGRGEQQGVSPNKMVRAIRKNYHNNWIVDNIPAASKVEDDNTVTTRYWQGFPVGFIASDTKKAHVHNHVNIEVEYHAVETDPTKARIVRFTVEPFSIKHDFEATDIQNPIESCNTKSANRAHTKYEMIYAHGRAPQEASGRVLFTYDVIWTENANLHWASRWDVYLSMDNAIPAKVHWLSIANSLVIVIVLSAMIAAILVRNLRRDFSRYNRLATDEEKQEDLEEFGWKLVHADVFRPPSFSPLLLAVACGTGAQLLCMTILTILFSAMGFLSPANRGALIMAQLLLYVLMGTVAGYV…	100	0	gi|224009001|ref|XP_002293459.1|	multispanning membrane protein [Thalassiosira pseudonana CCMP1335]	47.42	0	sp|Q9LIC2|TMN7_ARATH	Transmembrane 9 superfamily member 7 OS=Arabidopsis thaliana GN=TMN7 PE=2 SV=1	100	0	tr|B8CBW0|B8CBW0_THAPS	Transmembrane 9 superfamily member OS=Thalassiosira pseudonana GN=THAPSDRAFT_24735 PE=3 SV=1	-	-	-	-	-	-	-	K17086|1|0.0|577|atr:18448202| transmembrane 9 superfamily member 2/4		GO:0009976//tocopherol cyclase activity	GO:0044464//cell part;GO:0016021//integral component of membrane
270	EJK46463.1	hypothetical protein THAOC_34869 [Thalassiosira oceanica]	56410.3	0.031	1	1	-	0.45	0.037	4	0.0002893	EJK46463.1	MILLLLLCALATFAAAEEAAIRVFPQRTSTEAAVVEWGHSAIINALDGVVATFGPQTSDGATFEVETTPILAKPIDGLGTKQRSNDEDEYPGKLDNADEVDGNMVIMTDVAGFSGVTMARIAKESGAAALMVVNTDKEGDGDFIYSLEPENEEEERYAEEHIDIPVIMVSLQAGNIITTALATDDMDPAIVNSGGALPERVRLYAGGDRPFFEDAVSKSPVVYLIHNLLSDEECEALLKSAEKKYERIDDTSGTSNYLESSMASEKQGVPTAIDVDQTMLWKGSVGGKTFKDIDERISQVTGFPPEHFSDFQINKYVKGSLYGPHYDMNPANGIMATITVFLNDVPIEHGGEFVYPKTQNESGADGGDAVVIRPTKGLAVVHHNTDDRYNFDQSSVNQE…	100	0	gi|397568977|gb|EJK46463.1|	hypothetical protein THAOC_34869 [Thalassiosira oceanica]	28.7	4e-14	sp|F4JZ24|P4H10_ARATH	Probable prolyl 4-hydroxylase 10 OS=Arabidopsis thaliana GN=P4H10 PE=3 SV=1	100	0	tr|K0R1T9|K0R1T9_THAOC	Uncharacterized protein OS=Thalassiosira oceanica GN=THAOC_34869 PE=4 SV=1	gi|339327280|ref|YP_004686973.1|	68.9	4e-11	COG3751	Proline 4-hydroxylase (includes Rps23 Pro-64 3,4-dihydroxylase Tpa1), contains SM-20 domain	JO	Translation, ribosomal structure and biogenesis;Posttranslational modification, protein turnover, chaperones	K00472|1|4e-17|85.9|nnu:104603673| prolyl 4-hydroxylase [EC:1.14.11.2]	GO:0055114//oxidation-reduction process	GO:0016705//oxidoreductase activity, acting on paired donors, with incorporation or reduction of molecular oxygen;GO:0031418//L-ascorbic acid binding;GO:0005506//iron ion binding	-
271	EED93656.1	predicted protein [Thalassiosira pseudonana CCMP1335]	14256.6	0.07	1	1	XP_002288220.1	0.41	0.163	4	0.01814	EED93656.1	MLFASTALRNASRIGLRRCPTTPLQQLRHKSSGSGGIPTPLLIQWYNIFGKTTIGYATWMVAGIIVAEGMTGWFGDAVWNSVNKGRTFETVDWTKFASGDEEEEEEEEESEEEEGDGEDADGDDGDDDE	100	4e-67	gi|223997094|ref|XP_002288220.1|	predicted protein [Thalassiosira pseudonana CCMP1335]	-	-	-	-	100	1e-65	tr|B8BX68|B8BX68_THAPS	Uncharacterized protein OS=Thalassiosira pseudonana GN=THAPSDRAFT_3229 PE=4 SV=1	-	-	-	-	-	-	-	-	GO:0006122//mitochondrial electron transport, ubiquinol to cytochrome c	GO:0008121//ubiquinol-cytochrome-c reductase activity	GO:0005740//mitochondrial envelope
272	XP_002291727.1	predicted protein [Thalassiosira pseudonana CCMP1335]	59467.6	0.047	2	2	EED90578.1	0.64	0.014	4	3.202e-05	XP_002291727.1	MFSLVNLIVIQRKWTFNWTCTLFFPSPPNHTSQAPSTSLHRRRPHLIHQPHNTMTDPPPSKKRVSIAEPAASSNGTNGGRSIAPRRSMGPKQMSLKAFTPDNYSDDEDDKFFHDEDVVSGNTTGINEPGKGWTNGAITPQFTLHPYTRSGRLQLYSHHRRWINFQSSWSRIGAGSTELDAVHSESSSGKSVMTGCLLDEARTVRALVAQLCECFYKQGWATGTGGGVSIRVGGPKENRPYRVFVAPSGVQKEDMVGDDVFELDMDRNVVQPPKTPNLRQSACTPLWYVVYKHVPSAMCVIHTHSMYAQLATLLDPTEQSSVLRVTHLEMLKGVGNHSYDSILEIPIIDNRPSEDLLANQLEQVILKYPMCNAVLVRRHGVYAWGDSWEQAKAQCESFDY…	100	0	gi|224005533|ref|XP_002291727.1|	predicted protein [Thalassiosira pseudonana CCMP1335]	46.19	1e-50	sp|C1C4M8|MTNB_LITCT	Methylthioribulose-1-phosphate dehydratase OS=Lithobates catesbeiana GN=apip PE=2 SV=1	100	0	tr|B8C6J0|B8C6J0_THAPS	Uncharacterized protein OS=Thalassiosira pseudonana GN=THAPSDRAFT_270286 PE=4 SV=1	gi|262197429|ref|YP_003268638.1|	185	1e-53	COG0235	Ribulose-5-phosphate 4-epimerase/Fuculose-1-phosphate aldolase	G	Carbohydrate transport and metabolism	K16054|1|2e-51|186|csl:COCSUDRAFT_27259| methylthioribulose 1-phosphate dehydratase / enolase-phosphatase E1 [EC:4.2.1.109 3.1.3.77]	GO:0071267//L-methionine salvage	GO:0046872//metal ion binding;GO:0016791//phosphatase activity	GO:0005737//cytoplasm
273	XP_002286220.1	predicted protein, partial [Thalassiosira pseudonana CCMP1335]	37269.5	0.091	2	4	EED95861.1	0.51	0.066	4	0.001834	XP_002286220.1	MRPILLKGHERSITVVKFNHDGDLLFTGSKDHVPSVWRSENGERLGTFNGHKGTIWDLDVCRFSKRVVTASADAMAKLWDCETGECLKTFVHHGPVRGAAFADGSNMFATISDPFVEHNAQISVYDIPENDDPSTYSDTPRLEIELPKNSDGKRVNATNIVWLNLNEALFVTFDNGSIRLYDPVTGEELDEFFPHEKKINRVSFNLDKTLFITSSADFTAKLYDVVDLRHLKTYKTDRPVNDAVISETKDHILLGGGQEAMSVTTTSGKVGKFETRFFHLVYEEEFGTVKGHFGPINAIAINPNGRCYASGAEDGYIRLHYFDKSYLDMK	100	0	gi|223993073|ref|XP_002286220.1|	predicted protein [Thalassiosira pseudonana CCMP1335]	47.26	2e-108	sp|Q16K15|EIF3I_AEDAE	Eukaryotic translation initiation factor 3 subunit I OS=Aedes aegypti GN=AAEL013144 PE=3 SV=1	100	0	tr|B8BQX0|B8BQX0_THAPS	Eukaryotic translation initiation factor 3 subunit I (Fragment) OS=Thalassiosira pseudonana GN=THAPSDRAFT_26686 PE=3 SV=1	gi|257094183|ref|YP_003167824.1|	115	1e-26	COG5635	Predicted NTPase, NACHT family domain	T	Signal transduction mechanisms	K03246|1|3e-111|329|ppp:PHYPADRAFT_161649| translation initiation factor 3 subunit I	-	-	-
274	EED92064.1	alanine-trna ligase [Thalassiosira pseudonana CCMP1335]	106672	0.08	5	11	XP_002290312.1	0.73	0.075	4	0.008854	EED92064.1	MTDDKPVFATHPEWPMDKVRSTFISYFERNGHTFWRSSPCVPHDDPTLLFTNAGMNQYKPLFLGTCDPALKMASLKRATNSQKCIRAGGKHNDLDDVGKDVYHHTFFEMLGNWSFGDYFKKEAIEMAWKCLTEEFKLDPNRLYATYFGGDESTPCDDEAREIWLQYLPAERVLPFDAKDNFWEMGATGPCGPCTEIHYDRIGNRDASKLVNADLPDVIEIWNNVFIQFNREADGSLRPLPAQHVDTGMGFERLTSILQGVDSNYDTDIFIPLFDAIQKITGARPYAGKIEKEDPEFIDMAYRVVADHVRTLSFAIADGAVPSNDGRGYVLRRVLRRAVRYGRQNLNAELGFFAQLVRTLVELMGDTFPELREKEEYVTAIIREEEESFSKTVDKGIVEF…	100	0	gi|224001280|ref|XP_002290312.1|	alanine-trna ligase [Thalassiosira pseudonana CCMP1335]	52.63	0	sp|P36428|SYA_ARATH	Alanine--tRNA ligase OS=Arabidopsis thaliana GN=ALATS PE=1 SV=3	100	0	tr|B8C356|B8C356_THAPS	Alanine--tRNA ligase OS=Thalassiosira pseudonana GN=ALATS2 PE=3 SV=1	gi|383766272|ref|YP_005445253.1|	745	0	COG0013	Alanyl-tRNA synthetase	J	Translation, ribosomal structure and biogenesis	K01872|1|0.0|890|rcu:8286134| alanyl-tRNA synthetase [EC:6.1.1.7]	GO:0006419//alanyl-tRNA aminoacylation	GO:0004813//alanine-tRNA ligase activity;GO:0003676//nucleic acid binding;GO:0005524//ATP binding	GO:0005737//cytoplasm
275	EED93535.1	RS13, ribosomal protein 13 40S small ribosomal subunit [Thalassiosira pseudonana CCMP1335]	17139.3	0.132	3	8	XP_002289998.1	0.69	0.158	4	0.04155	EED93535.1	MGRMHAPGKGISKSAKPYKRTPPSWCKVSATDVEEHVCKLAKKGLTPSQIGVILRDSHGIAQVHTVTGQKIVRILKANGLAPEIPEDLYMLIKKAVAVRKHLERNRQDKDSKFRLILIESRIHRLARYYRTTRKLPANWKYESATASTMVA	100	3e-109	gi|224000651|ref|XP_002289998.1|	RS13, ribosomal protein 13 40S small ribosomal subunit [Thalassiosira pseudonana CCMP1335]	81.46	1e-89	sp|P62302|RS13_SOYBN	40S ribosomal protein S13 OS=Glycine max GN=RPS13 PE=2 SV=1	100	7e-108	tr|B8C0K5|B8C0K5_THAPS	RS13, ribosomal protein 13 40S small ribosomal subunit OS=Thalassiosira pseudonana GN=RS13 PE=3 SV=1	gi|57641186|ref|YP_183664.1|	155	7e-48	COG0184	Ribosomal protein S15P/S13E	J	Translation, ribosomal structure and biogenesis	K02953|1|5e-90|261|jcu:105645959| small subunit ribosomal protein S13e	GO:0006412//translation	GO:0003735//structural constituent of ribosome	GO:0022627//cytosolic small ribosomal subunit
276	EED90959.1	gcpe-like protein [Thalassiosira pseudonana CCMP1335]	76353.1	0.095	5	9	XP_002292108.1	0.83	0.085	4	0.03466	EED90959.1	MTKYCEDLYSVTRRKTRTVTCGPIQFGSDHPIVRQTMATTDTANVDASIEQIMRCADKGFDLIRITVQGKREANAAAKIREGLFKKGYDIPLCADMHFQPVVAQLVADAVEKIRINPGNFADGRKDFEEKVYESEADYVKEREYLVEAMLPLVQKCKDLNRCMRIGTNHGSLSSRVLSYYGDTPRGMVESALEFADICRSQDYHNFVFSMKASNPLVMVQSYRLLASEMYRLDWDYPLHLGVTEAGEGEDGRMKSAVGIGTLLADGLGDTVRVSLTEDPEFEYEPCNRLSEMAEGRLAATNPEAAARQSAVKKYVDTRDITTYSRRVGTLPTKKEGEKVDVEQFLNPNGSVISYISPKMLSEGNAPYLYKELGFKTAVGMPFKDIATSDSVFMRELPAT…	100	0	gi|224006295|ref|XP_002292108.1|	gcpe-like protein [Thalassiosira pseudonana CCMP1335]	54.95	0	sp|Q6K8J4|ISPG_ORYSJ	4-hydroxy-3-methylbut-2-en-1-yl diphosphate synthase (ferredoxin), chloroplastic OS=Oryza sativa subsp. japonica GN=ISPG PE=2 SV=1	100	0	tr|B8C7D5|B8C7D5_THAPS	Gcpe-like protein OS=Thalassiosira pseudonana GN=GcpE PE=3 SV=1	gi|46446374|ref|YP_007739.1|	597	0	COG0821	4-hydroxy-3-methylbut-2-en-1-yl diphosphate synthase IspG/GcpE	I	Lipid transport and metabolism	K03526|1|0.0|798|vcn:VOLCADRAFT_63610| (E)-4-hydroxy-3-methylbut-2-enyl-diphosphate synthase [EC:1.17.7.1 1.17.7.3]	GO:0055114//oxidation-reduction process;GO:0016114//terpenoid biosynthetic process	GO:0051539//4 iron, 4 sulfur cluster binding;GO:0046429//4-hydroxy-3-methylbut-2-en-1-yl diphosphate synthase activity;GO:0005506//iron ion binding	GO:0009507//chloroplast
277	EED90298.1	predicted protein [Thalassiosira pseudonana CCMP1335]	63423.6	0.014	1	1	XP_002292323.1	0.72	0.049	4	0.002293	EED90298.1	MGQNLLLVWLTAASVLNPSSAFSHGRSNDLNLNTKPSSRVNIRWNTAAVICRNQSNDEGGADSSPVVTSSSGGFTATPVKIEISSNPNTSTKTNKRANASTKKSPDKVNSATIGFNNKLNEMSKSFDAVTAPKVEALLLDAVEKYEQYLEQQIVQQEQCGNGDERKTATQKNNIIIPNTISFTNAITAWARCTRKDSPYRAHALLDQMHTLYKEKQWRHVKPNKISYNSVITAWARSRERGTSAKKAEELLRRMYEFYNEEEDGEDLKPDARSFNAVINAVARSRDKDCADRAKFLLDEMGRLYEEGDTDLVPDALTFGAIINAYANSMEEGSSDKAAQLLMHMESLYQLGFDKAKPTTFVYNACINCFAKDPIISNSGRMGKGGAMNGAEKAELLLGS…	100	0	gi|224006726|ref|XP_002292323.1|	predicted protein [Thalassiosira pseudonana CCMP1335]	-	-	-	-	100	0	tr|B8C8J6|B8C8J6_THAPS	Uncharacterized protein OS=Thalassiosira pseudonana GN=THAPSDRAFT_24049 PE=4 SV=1	-	-	-	-	-	-	-	K17710|1|3e-09|63.9|mtr:MTR_8g103480| pentatricopeptide repeat domain-containing protein 1!K17964|3|1e-08|62.4|dosa:Os07t0300200-01| leucine-rich PPR motif-containing protein, mitochondrial	-	-	-
278	EED88241.1	ABC-transporter like protein, partial [Thalassiosira pseudonana CCMP1335]	57223.4	0.022	1	2	XP_002294407.1	0.65	0.131	4	0.0215	EED88241.1	LHQTKLRLRRGHRYALVGQNGVGKTTLMNAINNGKLEGWPVDLLTEYVDSGSNVDPVHEAKIVFTHLMSSTGKSEEDCRGILKDQLKFTEEMMMGTIGELSGGWQMKLRLAKAVLVSSDILLLDEPTNHLDSKTILWLEDYLTSLTQTTVLIVSHDTQFLEHVCSDIIHYEQRPQWGPHRKLVHYAGTMSAFVKKQPQAKHYFELATTDLKFVFPDPGRLEGIRTSTQRFLEMEGVNFRYPGAEADTLANIDLKMTLSSRVVLIGANGAGKTTLVKMIVGDTQPSNPQECRFFIHHNLRIAYVSQHAFYHVEQHIEDSPVAYIQWRFKDGFDKEKIESEAYRIPPEEQAAIEAYNLEGIWSRRLRAGVLEYEIKKKNVREKDNIYVSKDELLSMGFKHL…	100	0	gi|224010900|ref|XP_002294407.1|	ABC-transporter like protein [Thalassiosira pseudonana CCMP1335]	45.02	6e-144	sp|O14134|ELF1_SCHPO	mRNA export factor elf1 OS=Schizosaccharomyces pombe (strain 972 / ATCC 24843) GN=elf1 PE=1 SV=1	100	0	tr|B8CEB9|B8CEB9_THAPS	ABC-transporter like protein (Fragment) OS=Thalassiosira pseudonana GN=THAPSDRAFT_13884 PE=4 SV=1	gi|83643184|ref|YP_431619.1|	142	2e-34	COG0488	ATPase components of ABC transporters with duplicated ATPase domains	R	General function prediction only	K03235|1|3e-158|480|csl:COCSUDRAFT_47721| elongation factor 3	GO:0006200//ATP catabolic process	GO:0005524//ATP binding;GO:0016887//ATPase activity	-
279	EJK62564.1	hypothetical protein THAOC_16820 [Thalassiosira oceanica]	65205.5	0.033	1	1	-	0.63	0.131	4	0.01928	EJK62564.1	MPNNAEAEAFKAEGNKALQAGNLTKAIEEYTKAINADGANHVYFSNRSAAYLKKGDGNNALEDAESTIALNPDFSKGYSRKGAALHALKRYNDSIAAYEEGIAKFPSDAALQKGLEQVKRDKDGPSRPSGGRMPGMQQNPFGDQLIQRIMLNPKTRPYLNDKDFMAKLKLLQQDPNMLPQLLSDPKMMEVLGIALGGDGDDDNDDSPSAPTAKKAEPVKKEEPKKDEPKVEEEEDLSQLSPEERKKREDQKAAVECKQKGNDLYKAKKFDEAQAAYDEAIELDPTNMTFVNNKAAVYFTAKKYDECIEACMKAVEVGKANRAPFEDRAKAYTRCAKAYQKKGDLDKAIEMCKESLLENYDKPTERMMKNMELEKKKADAEAYHDDDKAEEAKQRGNEHF…	100	0	gi|397614048|gb|EJK62564.1|	hypothetical protein THAOC_16820 [Thalassiosira oceanica]	35.79	6e-108	sp|Q9STH1|HSOP3_ARATH	Hsp70-Hsp90 organizing protein 3 OS=Arabidopsis thaliana GN=HOP3 PE=2 SV=1	100	0	tr|K0SC93|K0SC93_THAOC	Uncharacterized protein OS=Thalassiosira oceanica GN=THAOC_16820 PE=4 SV=1	gi|220927089|ref|YP_002502391.1|	88.2	2e-16	COG4249	Uncharacterized protein, contains caspase domain	R	General function prediction only	K09553|1|2e-113|354|ota:Ot06g00760| stress-induced-phosphoprotein 1	-	-	-
280	sp|A0T0X2.1|RK3_THAPS	RecName: Full=50S ribosomal protein L3, chloroplastic	22036.9	0.304	1	1	YP_874584.1;ABK20807.1	0.17	0.096	4	0.005515	sp|A0T0X2.1|RK3_THAPS	MSLGLLGNKIGMTQIFDESGNIIPVTILKVGPCVITQVKTTLNDGYNAIQVGYGNVSTKALTQPQLGHLQKSNIQPLKYLKEFHVSDPTEFNVGQILNVESFVAGQLINVTGKSIGKGFSGLQKRYNFARGPMTHGSKNHRAPGSIGMGTSPGRVLPGKKMAGQLGNKTANIKKLKIVQVNNDENILVVKGAVPGKPGNLLSIIPSK	100	7e-147	gi|118411190|ref|YP_874584.1|	50S ribosomal protein L3 [Thalassiosira pseudonana]	100	1e-147	sp|A0T0X2|RK3_THAPS	50S ribosomal protein L3, chloroplastic OS=Thalassiosira pseudonana GN=rpl3 PE=3 SV=1	94.2	6e-138	tr|A0A089X984|A0A089X984_THAWE	50S ribosomal protein L3, chloroplastic OS=Thalassiosira weissflogii GN=rpl3 PE=3 SV=1	gi|428224235|ref|YP_007108332.1|	276	2e-93	COG0087	Ribosomal protein L3	J	Translation, ribosomal structure and biogenesis	K02906|1|2e-71|221|sind:105168351| large subunit ribosomal protein L3	GO:0006412//translation	GO:0003735//structural constituent of ribosome;GO:0019843//rRNA binding	GO:0005840//ribosome;GO:0009507//chloroplast
281	XP_002288652.1	predicted protein [Thalassiosira pseudonana CCMP1335]	36569.5	0.019	11	12	-	0.42	0.039	4	0.004255	XP_002288652.1	SFITNSDGREMQLDLLRYTVLSALEGRANLSTLTPTERLSGTPFLDVVPLRVGSSVEEEMSNALFQVDK	100	0	gi|223995745|ref|XP_002288652.1|	predicted protein [Thalassiosira pseudonana CCMP1335]	45.54	0	-		100	0	-	-	-	-	-	-	-		Transthyretin-like protein	K07127|1|3e-13|67.8|spar:SPRG_10144| 5-hydroxyisourate hydrolase [EC:3.5.2.17]	GO:0006810//transport;GO:0019428//allantoin biosynthetic process
282	XP_002296774.1	predicted protein, partial [Thalassiosira pseudonana CCMP1335]	14117.6	0.244	3	10	EED86975.1	0.5	0.046	4	0.0006274	XP_002296774.1	VRTKTVKKSARTIVEKYYPRLTLDFHTNKRIIDEIAITPSKRMRNKIAGFTTHLMKRIAKGPVRNISLKLQEEERERRLDFVPEVSALEQETIAIDRETRDLLESMGYGSLNGVVVSNSADRS	100	3e-79	gi|224014222|ref|XP_002296774.1|	predicted protein [Thalassiosira pseudonana CCMP1335]	65.55	3e-49	sp|Q9P7J6|RS17B_SCHPO	40S ribosomal protein S17-B OS=Schizosaccharomyces pombe (strain 972 / ATCC 24843) GN=rps1702 PE=1 SV=1	100	7e-78	tr|B8LCF3|B8LCF3_THAPS	Predicted protein (Fragment) OS=Thalassiosira pseudonana GN=THAPSDRAFT_37809 PE=3 SV=1	gi|333911189|ref|YP_004484922.1|	61.6	3e-12	COG1383	Ribosomal protein S17E	J	Translation, ribosomal structure and biogenesis	K02962|1|7e-54|168|olu:OSTLU_31424| small subunit ribosomal protein S17e	GO:0006412//translation	GO:0003735//structural constituent of ribosome	GO:0005840//ribosome
283	XP_002292390.1	predicted protein [Thalassiosira pseudonana CCMP1335]	130282	0.017	1	1	EED90365.1	0.6	0.074	4	0.003685	XP_002292390.1	MSSIFKKLFSRKSSKSEALALSGSSSFGGGSNGGGGSASYGGFGSPSNVVNNNSKQSGGFGSILTKKKSNNNNNKPKRLSRKQKRQDKKAAFPSLPGTGKRDSSVPFSSANNNANGTYNHGNGGDLFAEEKENSPVGGGSQGHTTTMGMRGGGGYIDHHQTMSYTKPTLSLIAEEVSSPRNDENSNVYNGSDGNGMNGSFSSGVGGMAKSGNNGVGGHQLLSPMSGNKPPLTPNRMGRSSNTTSNNINSGHRHHNDPSSSPISPDASLRGIHHANSPSNTSASSNDIMCLSSDADDEEYNRIAFKGGTGAANTNGIGKGGVAAAGNNNNSGATTVTNKEGSKEEKYVSALDRSPFSYGSDDDNALFPALVDDKDPFAQDPMMRIGNPRLKNGNAIVGMT…	100	0	gi|224006860|ref|XP_002292390.1|	predicted protein [Thalassiosira pseudonana CCMP1335]	-	-	-	-	100	0	tr|B8C7R8|B8C7R8_THAPS	Uncharacterized protein OS=Thalassiosira pseudonana GN=THAPSDRAFT_23916 PE=4 SV=1	-	-	-	-	-	-	-	-	-	-	-
284	XP_002288567.1	heat shock protein/chaperone [Thalassiosira pseudonana CCMP1335]	70445.5	0.165	1	8	EED94003.1	0.68	0.049	4	0.001622	XP_002288567.1	MGMVSPLVSAQEETKVGTTIGIDLGTTYSCVGVFKNGRVEIMANDQGNRITPSYVAFMDNGERLVGDAAKNQATINPENTVFDVKRLIGRNFSDKSVQADKKLVPYKIVSNENKPMVEVDIEGKPQRFAPEEVSAMILQKMKSTAETFLGKEIKNAVVTVPAYFNDAQRQATKDAGTISGMKVERIINEPTAAAIAYGMDKTGGESNVLVFDLGGGTFDVTLLTIDNGVFEVLATNGDTHLGGEDFDQRVMQYFIKMMKKKSNVDISGDKRALQKLRKEVERVKRALSSQQQARLEIEDLAEGFDFSETLTRARFEELNNDLFKKTLGPVGRVLEDADVSKSEVDEIVLVGGSTRIPKVQSLISEFFGGKEPSKGINPDEAVAYGAAVQGGILSGEGGD…	100	0	gi|223997788|ref|XP_002288567.1|	heat shock protein/chaperone [Thalassiosira pseudonana CCMP1335]	72.41	0	sp|P49118|BIP_SOLLC	Luminal-binding protein OS=Solanum lycopersicum PE=2 SV=1	100	0	tr|B8BWB9|B8BWB9_THAPS	Heat shock protein/chaperone OS=Thalassiosira pseudonana GN=hsp70_4 PE=3 SV=1	gi|17988285|ref|NP_540919.1|	625	0	COG0443	Molecular chaperone DnaK (HSP70)	O	Posttranslational modification, protein turnover, chaperones	K09490|1|0.0|931|spen:107028456| heat shock 70kDa protein 5	GO:0006950//response to stress	GO:0005524//ATP binding	GO:0005788//endoplasmic reticulum lumen
285	ADB27587.1	50S ribosomal protein L5 (chloroplast) [Thalassiosira oceanica CCMP1005]	27553.7	0.113	2	2	YP_004072634.1	0.54	0.161	4	0.02336	ADB27587.1	MRSQHSLEEIAELYGLLENIKKEYENGIHSVLRKSNPELFSNPHTIPKLKKISINRGLGLAAQNSNILKKSITEFTRITGQKPLITRAKKAVAGFKIRENMELGLSSTLRGEKMYNFLTKLIFFTFAQIRDFRGLSVRSFDKAGNYTFSLKEQLIFPEIEYDDVDQIQGLSVTLVVDSSTPKARSKTIDRVLNGMILLKFLRFPLNDCGYYDKYSSFGEINQVWDKKKHLRRKRWSQE	100	4e-176	gi|315320577|ref|YP_004072634.1|	50S ribosomal protein L5 [Thalassiosira oceanica CCMP1005]	94.96	4e-170	sp|A0T0Y5|RK5_THAPS	50S ribosomal protein L5, chloroplastic OS=Thalassiosira pseudonana GN=rpl5 PE=3 SV=1	100	1e-174	tr|E7BWN0|E7BWN0_THAOC	50S ribosomal protein L5, chloroplastic OS=Thalassiosira oceanica GN=rpl5 PE=3 SV=1	gi|17231695|ref|NP_488243.1|	181	5e-56	COG0094	Ribosomal protein L5	J	Translation, ribosomal structure and biogenesis	K02931|1|2e-41|143|smo:SELMODRAFT_6364| large subunit ribosomal protein L5	GO:0006412//translation	GO:0003735//structural constituent of ribosome;GO:0019843//rRNA binding	GO:0005840//ribosome;GO:0009507//chloroplast;GO:0005739//mitochondrion
286	XP_002295206.1	predicted protein [Thalassiosira pseudonana CCMP1335]	34361.2	0.099	2	6	EED87510.1	0.59	0.061	4	0.001983	XP_002295206.1	MPLSAERKQQYFSTMKELMTTYSKCFIVEIDNVGSMQIQQTRLALRGKAEVLMGKNTMMRKCIREFVEENPDTPIAQLEACCRGNVGFVFTNGDLGAVREVLESNVRPAPARVGAVAPIDVIVPKGPTGCDPGQTAFFQTLQIATKITKGQIEMTTDTHLISAGERVTASQAALLQKLAMEPFTYGLVLKSVYDSGSLFDAKVLDITDDVLAAKFVSALNTISKLSLALNIPTQASVTHSIANAFKAILSVTVELENYSFDKADIYKAYLADPSAFAGSGGGGGGGGDGGETSAAAAVEEVEEEEAPPAVDMFGGGDGGGGDY	100	0	gi|224013108|ref|XP_002295206.1|	predicted protein [Thalassiosira pseudonana CCMP1335]	51.3	1e-80	sp|Q90YX1|RLA0_ICTPU	60S acidic ribosomal protein P0 OS=Ictalurus punctatus GN=rplp0 PE=2 SV=1	100	0	tr|B8CG46|B8CG46_THAPS	60S acidic ribosomal protein P0 OS=Thalassiosira pseudonana GN=THAPSDRAFT_25812 PE=3 SV=1	gi|435846982|ref|YP_007309232.1|	127	3e-32	COG0244	Ribosomal protein L10	J	Translation, ribosomal structure and biogenesis	K02941|1|1e-79|248|mis:MICPUN_92321| large subunit ribosomal protein LP0	GO:0042254//ribosome biogenesis;GO:0006414//translational elongation	GO:0003735//structural constituent of ribosome	GO:0005840//ribosome
287	ADB27565.1	chaperonin ClpC (chloroplast) [Thalassiosira oceanica CCMP1005]	105357	0.073	2	2	YP_004072651.1;YP_004072612.1;ADB27604.1	0.7	0.072	4	0.006109	ADB27565.1	MFEKFTEGAIKVIMLGQEEARRMGHNFVGTEQLLLGSIGQRHGIAGRALAQLNITLKKTRKEVEKYIGRGKGYVASEIPFTPRAKRVLEMSIHEGQDLGVNYVGTEHILLSILTEGEGIAIRTLDVLRVNIPKLRHLILTYIEEQQEDILKPHLTDQEKWAIARDKNGLKTPSLDAYSENITKEVIENKLDPVIGRDEEISALVKVLGRRRKNNPVLVGEAGVGKTACAEGLAILMQSVDCPDFLREHVIRSLDLGSVLAGTKYRGEFEERMKHIIEEVNNHGKTILVIDEIHTIVGAGAAEGAVDAANLLKPSLARGTLRVIGATTLDEYRRYIEKDPALERRFHSVIVEEPSIETTIDILRGLKPEFQRHHALAYEDSCLELAATLSSRFIADRNLP…	100	0	gi|315320555|ref|YP_004072612.1|	chaperonin ClpC [Thalassiosira oceanica CCMP1005]	62.01	0	sp|P49574|CLPC_ODOSI	ATP-dependent Clp protease ATP-binding subunit ClpA homolog OS=Odontella sinensis GN=clpC PE=3 SV=1	100	0	tr|E7BWK8|E7BWK8_THAOC	Chaperonin ClpC OS=Thalassiosira oceanica GN=clpC PE=3 SV=1	gi|428210348|ref|YP_007094701.1|	907	0	COG0542	ATP-dependent Clp protease ATP-binding subunit ClpA	O	Posttranslational modification, protein turnover, chaperones	K03696|1|0.0|843|vcn:VOLCADRAFT_75431| ATP-dependent Clp protease ATP-binding subunit ClpC	GO:0006508//proteolysis	GO:0008233//peptidase activity;GO:0005524//ATP binding;GO:0017111//nucleoside-triphosphatase activity	GO:0009507//chloroplast
288	EED94198.1	anion-transporting ATPase [Thalassiosira pseudonana CCMP1335]	38767.1	0.283	6	9	XP_002288762.1	0.57	0.065	4	0.002174	EED94198.1	MTDAYDYDDEDLPDPSLKNILEQESLQWIFVGGKGGVGKTTTSCCLGTQLAKHRKKVLIVSTDPAHNLSDAFCQKIGREPTPIQGFTNLSAMEIDATEDLDKMQRSMEDATGAGSDDDASGIQSLMTELTNSIPGIDEAMSFSELMKQVQNMDYDVVVFDTAPTGHTLRLLSFPTILEKAFGKLMDLKDRFGGLIGQASALFGGGSPDQVQAALLGRLEETREIINKVNTAFQDPALTTFVCVCIPEFLSIYETERLVQELSKFGIDSHNIVVNQVLFPEKDAEEEICSKMMARKRMQDKYIGQCFDLYGDDFHVVLMPLLDHEVRGVEKLKDFSELLINPIDLEE	100	0	gi|223998178|ref|XP_002288762.1|	anion-transporting ATPase [Thalassiosira pseudonana CCMP1335]	55.83	3e-119	sp|Q4P7S5|GET3_USTMA	ATPase GET3 OS=Ustilago maydis (strain 521 / FGSC 9021) GN=GET3 PE=3 SV=1	100	0	tr|B8BXF4|B8BXF4_THAPS	ATPase ASNA1 homolog OS=Thalassiosira pseudonana GN=THAPSDRAFT_39841 PE=3 SV=1	gi|312137029|ref|YP_004004366.1|	195	3e-58	COG0003	Anion-transporting ATPase, ArsA/GET3 family	P	Inorganic ion transport and metabolism	K01551|1|3e-115|341|csv:101204751| arsenite-transporting ATPase [EC:3.6.3.16]	GO:0006200//ATP catabolic process;GO:0071722//detoxification of arsenic-containing substance	GO:0015446//arsenite-transmembrane transporting ATPase activity;GO:0005524//ATP binding	-
289	EED89581.1	5-methyltretrahydrofolate-homocysteine s-methyltransferase [Thalassiosira pseudonana CCMP1335]	140403	0.098	9	25	XP_002293120.1	0.73	0.057	4	0.003728	EED89581.1	MGTMIQNYAKRNRLEEEEYRGDRFANWKCNMKGNNDQLSITQPHIISGIYKEYLEVGGSDLIGTNTFSSTTIAMADYEMEDYVYELNYEGARLAREACDEVTAKDPTRPRFVVGAIGPTNRTGSISPSVEDPSARNVTFDELVEAYFEQIVALMDGGSDILMVETIFDTLNAKAALYAVGEYLEFSGLDIPVFVSGTLVDQSGRTLSGQTGEAFYASIRHAKPMCVGLNCALGANHMVPFVEKLANCVECFLHVYSNAGLPNAMGGYDETPDMMAIQNKVFFENGWLNMVGGCCGSTPPHIKAIREMSEGYKPRKLPDVGRPKMWLSGLEDLVVDDVHNHLGLPFLNVGERCNISGSIRFKKLMMAGDYGTAMDIAKKQVEDGAHVIDINVDDGMLDGL…	100	0	gi|224008322|ref|XP_002293120.1|	5-methyltretrahydrofolate-homocysteine s-methyltransferase [Thalassiosira pseudonana CCMP1335]	55.02	0	sp|Q54P92|METH_DICDI	Methionine synthase OS=Dictyostelium discoideum GN=mtr PE=3 SV=1	100	0	tr|B8C9X1|B8C9X1_THAPS	5-methyltretrahydrofolate-homocysteine s-methyltransferase OS=Thalassiosira pseudonana GN=MHMT1 PE=4 SV=1	gi|326797812|ref|YP_004315631.1|	1354	0	COG1410	Methionine synthase I, cobalamin-binding domain	E	Amino acid transport and metabolism	K00548|1|0.0|1390|ccp:CHC_T00005524001| 5-methyltetrahydrofolate--homocysteine methyltransferase [EC:2.1.1.13]	GO:0042558//pteridine-containing compound metabolic process;GO:0009086//methionine biosynthetic process;GO:0032259//methylation	GO:0008705//methionine synthase activity;GO:0031419//cobalamin binding;GO:0008898//S-adenosylmethionine-homocysteine S-methyltransferase activity;GO:0008270//zinc ion binding	GO:0005622//intracellular
290	EJK56375.1	hypothetical protein THAOC_23746 [Thalassiosira oceanica]	20343.4	0.24	1	1	-	0.45	0.112	4	0.007237	EJK56375.1	MVRELFTMARSKRACIIFFDEVDAIGGARSGSDDNGSDNEVQRTMLQIVTELDGFDARGNIKVLMATNRPDTLDPALLRPGRLDRKVEFGLPDLEGRGHILKIHSKKMNCDRDIRFELIARLCPNTTGAELHSVCTEAGMFAIRARRKSVSEKDFLDSVNKVVKGYKKFSSTPKYMVYN	100	5e-131	gi|397595021|gb|EJK56375.1|	hypothetical protein THAOC_23746 [Thalassiosira oceanica]	82.68	5e-107	sp|P0DKK0|PRS7B_ORYSJ	26S proteasome regulatory subunit 7B OS=Oryza sativa subsp. japonica GN=RPT1B PE=2 SV=1	100	1e-129	tr|K0RTL2|K0RTL2_THAOC	Uncharacterized protein OS=Thalassiosira oceanica GN=THAOC_23746 PE=3 SV=1	gi|18976487|ref|NP_577844.1|	184	1e-55	COG1222	ATP-dependent 26S proteasome regulatory subunit	O	Posttranslational modification, protein turnover, chaperones	K03061|1|7e-110|314|dosa:Os02t0784700-00| 26S proteasome regulatory subunit T1	GO:0030163//protein catabolic process;GO:0006508//proteolysis	GO:0008233//peptidase activity;GO:0005524//ATP binding;GO:0017111//nucleoside-triphosphatase activity	GO:0005737//cytoplasm;GO:0000502//proteasome complex
291	ADB27480.1	metallo-endopeptidase FtsH (chloroplast) [Thalassiosira oceanica CCMP1005]	70109.8	0.234	1	3	YP_004072526.1	0.56	0.135	4	0.01583	ADB27480.1	MGKQILRSLLIGIILISTIDLSVKTFGIQTPESPEIVRNEAQLNQNVVSSRMTYGRFLEYLEMGWVKQVDLYDNSRNAIVQASSPELGNRPQTIRVEIPVGASQLIQKLKEYNIDFDAHPAEQKNLFVTIASNLLLPLIFIAGLVYFFQNSENFGGGNGQSPLSLGKSTARFERRPDTGVNFKDIAGIDEAKAEFEEIVSFLKEPEKYTVVGAKIPKGILLVGPPGTGKTLLAKAIANEADVPFFSVAGSEFVEMFIGIGAARVRDLFQKASENAPCIVFIDEIDAVGRERGAGVGGGNDEREQTLNQLLTEMDGFKENKGVIVVGATNRVDILDAALLRPGRFDRQVTVNLPDRLGRIGILKVHAKNKPLGDDVSLVQLANRTPGFSGADLANLLNEA…	100	0	gi|315320470|ref|YP_004072526.1|	metallo-endopeptidase FtsH [Thalassiosira oceanica CCMP1005]	86.97	0	sp|P49825|FTSH_ODOSI	ATP-dependent zinc metalloprotease FtsH OS=Odontella sinensis GN=ftsH PE=3 SV=1	100	0	tr|E7BWC2|E7BWC2_THAOC	ATP-dependent zinc metalloprotease FtsH OS=Thalassiosira oceanica GN=ftsH PE=3 SV=1	gi|113477982|ref|YP_724043.1|	758	0	COG0465	ATP-dependent Zn proteases	O	Posttranslational modification, protein turnover, chaperones	K03798|1|0.0|639|csl:COCSUDRAFT_22213| cell division protease FtsH [EC:3.4.24.-]	GO:0006200//ATP catabolic process;GO:0051301//cell division;GO:0006508//proteolysis;GO:0030163//protein catabolic process	GO:0008270//zinc ion binding;GO:0004222//metalloendopeptidase activity;GO:0005524//ATP binding;GO:0016887//ATPase activity	GO:0016021//integral component of membrane;GO:0009535//chloroplast thylakoid membrane
292	ADB27506.1	photosystem I assembly protein Ycf4 (chloroplast) [Thalassiosira oceanica CCMP1005]	20536.1	0.144	2	3	EJK52347.1;EJK55851.1;YP_004072552.1	0.67	0.087	4	0.008252	ADB27506.1	MQNQIRQDKIVGSRRFSNYFWAILLLIGGLAFLLAGVSSYLKIKLLPFVNTTELVFIPQGIVMMFYGTLSFGLSLYISATLFWDIGSGYNEYNKIESLVKVVRKGFPGKNREILLTYPLNNIQSIGIKISEGLNPQRIIYLCLKDERKIPLTPVQQPDSISDLEDEAADLAKFLDLKLENL	100	3e-100	gi|315320496|ref|YP_004072552.1|	photosystem I assembly protein Ycf4 [Thalassiosira oceanica CCMP1005]	91.3	3e-95	sp|A0T0U3|YCF4_THAPS	Photosystem I assembly protein Ycf4 OS=Thalassiosira pseudonana GN=ycf4 PE=3 SV=1	100	8e-99	tr|K0S4J3|K0S4J3_THAOC	Photosystem I assembly protein Ycf4 OS=Thalassiosira oceanica GN=ycf4 PE=3 SV=1	-	-	-	-	-	-	-	K01963|1|1e-19|89.0|mtr:MTR_4g034770| acetyl-CoA carboxylase carboxyl transferase subunit beta [EC:6.4.1.2]	GO:0015979//photosynthesis		GO:0016021//integral component of membrane;GO:0009522//photosystem I;GO:0009535//chloroplast thylakoid membrane
293	EJK47796.1	hypothetical protein THAOC_33466 [Thalassiosira oceanica]	52299.5	0.087	1	1	-	0.4	0.197	4	0.03338	EJK47796.1	MATAIADGMPGLSCRSDDTVREVLRGCRDHLSHYVKGLAGGSQEQAQLGLGHSYSRGRVKFNPARSDNMIIQSIALLDQMDKDLNTFAMRVREWYSWHFPELKDHVKDNYMYARCAAFIRDKRSLCSGGDTAENGESDNGKVNGEGVESPEEKLAGLVEIIGDEEVAKAVVVAARTSMGMDCSSMDMVNIVNFTQRMVKLAEYRKQLASYLTDKMAVVAPNLSTLIGDTVAARLISKAGSLTNLAKAPASTVQILGAEKALFRALKTKGNTPKYGLIYHSSFIGRADAKNKGRISRYLANKCSIATRIDSFADEPTSVYGQKLRDQVEERLKFYETGAAPRKNIDVMEEVARHLKAGDDAEAEADEISKKKKKKKDKKTPSKKRKAEDEGADEEEDAKA…	100	0	gi|397571429|gb|EJK47796.1|	hypothetical protein THAOC_33466 [Thalassiosira oceanica]	61.06	8e-138	sp|O00567|NOP56_HUMAN	Nucleolar protein 56 OS=Homo sapiens GN=NOP56 PE=1 SV=4	100	0	tr|K0RFS6|K0RFS6_THAOC	Uncharacterized protein OS=Thalassiosira oceanica GN=THAOC_33466 PE=4 SV=1	gi|305662468|ref|YP_003858756.1|	180	5e-50	COG1498	RNA processing factor Prp31, contains Nop domain	J	Translation, ribosomal structure and biogenesis	K14564|1|3e-145|427|olu:OSTLU_50302| nucleolar protein 56	-	-	-
294	XP_002287665.1	NADPH nitrite reductase [Thalassiosira pseudonana CCMP1335]	110824	0.047	3	7	EED95108.1	0.68	0.073	4	0.005492	XP_002287665.1	MVGQRFMENLIDLDVDKKCIISTFCEEPRAAYNRVKLTSYFETRNPSSLSMTSEFDSDGRTPWYEENNVELLLNDKAVSIDTKEKTVTGASGKKVDYDVAVFATGSYPFVPPIPGKQRPGVFVYRTIEDLESMLAYVKANNVKSAAVIGGGLLGLEAAKAVADMKVQSHIIEFAPILMCRQIDEGGHNALVGKIEEMGLKVHCGARTESFVGQDGTTDNDSMSPVSALRFSNEGWDDLDVQMIVVSAGIKPRDDLAKDTDIALGERGGIIVDEQLRTNVNGVYAIGEIALYNNFIYGLIAPGYEMAGVCSKIVAKEEFGIDVDFVEEPAFTGADLSTKLKLLGCDVASFGENQPSPDDPDVSNLVWNDPLGGIYRKLIFNKAGSRLRGGILVGDASDYS…	100	0	gi|223995983|ref|XP_002287665.1|	NADPH nitrite reductase [Thalassiosira pseudonana CCMP1335]	42.4	0	sp|Q06458|NIRB_KLEOX	Nitrite reductase [NAD(P)H] large subunit OS=Klebsiella oxytoca GN=nasB PE=3 SV=1	100	0	tr|B8BTJ8|B8BTJ8_THAPS	NADPH nitrite reductase OS=Thalassiosira pseudonana GN=NIR_1 PE=4 SV=1	gi|294054958|ref|YP_003548616.1|	862	0	COG1251	NAD(P)H-nitrite reductase, large subunit	C	Energy production and conversion	K08232|1|9e-13|75.5|egu:105061389| monodehydroascorbate reductase (NADH) [EC:1.6.5.4]	GO:0042128//nitrate assimilation;GO:0055114//oxidation-reduction process	GO:0050660//flavin adenine dinucleotide binding;GO:0050661//NADP binding;GO:0020037//heme binding;GO:0051537//2 iron, 2 sulfur cluster binding;GO:0008942//nitrite reductase [NAD(P)H] activity	-
295	EED89644.1	predicted protein, partial [Thalassiosira pseudonana CCMP1335]	24699	0.041	1	1	XP_002293183.1	0.45	0.174	4	0.02414	EED89644.1	SNKLIVILDQAKLETIKNRRGNYELLNCDDHRDICKKKLKKDPKEFRPDICHQELLALLDSPLNKSGHLQIYIRTSRNVLIELHPSVRIPRTYKRFAGLMVQLLHKMKIKASENGTTLMKVIKNPMSQHLPVGTRVYGMSCQGTLYSPLGLAKALIPLDPNGNEGQVCFVIGAMAAGHVSVEDHPYIEKMFSISEYPLSGASAINRILGAIEHQWGIV	100	6e-154	gi|224008448|ref|XP_002293183.1|	predicted protein [Thalassiosira pseudonana CCMP1335]	50	2e-61	sp|Q9W4J5|NEP1_DROME	Ribosomal RNA small subunit methyltransferase NEP1 OS=Drosophila melanogaster GN=CG3527 PE=3 SV=2	100	2e-152	tr|B8CAA0|B8CAA0_THAPS	Uncharacterized protein (Fragment) OS=Thalassiosira pseudonana GN=THAPSDRAFT_36986 PE=4 SV=1	gi|305662898|ref|YP_003859186.1|	86.7	5e-19	COG1756	rRNA pseudouridine-1189 N-methylase Emg1, Nep1/Mra1 family	J	Translation, ribosomal structure and biogenesis	K14568|1|2e-55|179|ppp:PHYPADRAFT_46413| rRNA small subunit pseudouridine methyltransferase Nep1 [EC:2.1.1.260]	GO:0032259//methylation	GO:0008168//methyltransferase activity	-
296	EJK50060.1	hypothetical protein THAOC_31011 [Thalassiosira oceanica]	97994.8	0.02	1	1	-	0.66	0.17	4	0.04224	EJK50060.1	MADSIDGTMSSLPQSTCLQASHFLSQLSQAFTRSPQLRRAVLGSPSSLQFSTASTATGKRRRKNPRQDPTTLERAASRLPGYVDGALKSTAEDTIEASTQASASDEVERSLFPNAGKNVLDIPPRMRFAPSPTGSLHVGGARTALYNWLVAKKGQLDHPNTEGGFVLRVEDTDLARSTKESEDSVLADLSWLGLTWDEGPDMPLAKYGPYRQSERSSLYSKLAQTLIDEGKAYPCFCTAEELEEMKVRMEAEGIPPRYDGTWRDADPALVKEKMAAGDPYTVRFKVPDGVRVVIDDAVRGTVSWDAEATVGDFILLRSSGVPVYNFCVAVDDASMGITTVIRAEEHLTNTLRQGLILDALGAPRPRYAHCSLILGEDKQKLSKRHGATSCNQFRLDGFL…	100	0	gi|397576095|gb|EJK50060.1|	hypothetical protein THAOC_31011 [Thalassiosira oceanica]	45.39	1e-149	sp|Q43794|SYE_TOBAC	Glutamate--tRNA ligase, chloroplastic/mitochondrial OS=Nicotiana tabacum PE=2 SV=1	100	0	tr|K0RA66|K0RA66_THAOC	Uncharacterized protein OS=Thalassiosira oceanica GN=THAOC_31011 PE=3 SV=1	gi|78042984|ref|YP_361145.1|	397	1e-127	COG1384	Lysyl-tRNA synthetase, class I	J	Translation, ribosomal structure and biogenesis	K01885|1|0.0|553|ccp:CHC_T00008453001| glutamyl-tRNA synthetase [EC:6.1.1.17]	GO:0006424//glutamyl-tRNA aminoacylation	GO:0004818//glutamate-tRNA ligase activity;GO:0005524//ATP binding	GO:0005737//cytoplasm
297	ACI64777.1	predicted protein [Thalassiosira pseudonana CCMP1335]	86679.4	0.019	1	1	XP_002296060.1	0.58	0.017	4	4.498e-05	ACI64777.1	MSSDQSDSMGRSDDDEEVPMKAAAKDNNGGGGENKEADSSFLDDDFLSFGGVGSADGDGAEADDGRGGGGGANYNSGADRRNSGGGNGCKRERSLSLVPTNTIPWLDIAATQQQQQRNTNNYQQQNSHNDRSRGYGGGTNPNYNTNSNYNNSYSPPLVKLHNEMVSFVKLMEPTKEELEVRERMVKRVTELAERTFGKGKCEVLPFGSQVTGLCLPNSDIDFVIRFPKKKKDATKIKKGGSKPDAINLDESEKKTKEKDGGQEEGEDLEDLISNPLHKLAEAVREEFGIRSELDTMDPAVDDEVDDASEHLSYLEVIEQTRVPLVKFTVAPYNLDIDVCFDQPGGPESAELMHRFMESMPPLRPLTFILKYFLASRDMNKPYTGGIGSYLLQIMIVSFL…	100	0	gi|224004818|ref|XP_002296060.1|	predicted protein [Thalassiosira pseudonana CCMP1335]	36.94	4e-34	sp|Q8NDF8|PAPD5_HUMAN	Non-canonical poly(A) RNA polymerase PAPD5 OS=Homo sapiens GN=PAPD5 PE=1 SV=2	100	0	tr|B5YMB1|B5YMB1_THAPS	Predicted protein OS=Thalassiosira pseudonana GN=THAPS_23362 PE=4 SV=1	-	-	-	-	-	-	-	K03514|1|3e-39|150|mis:MICPUN_69731| non-canonical poly(A) RNA polymerase PAPD5/7 [EC:2.7.7.19]	-	-	-
298	YP_009093250.1	RNA polymerase alpha subunit (chloroplast) [Roundia cardiophora]	35312.9	0.153	1	4	AIR75923.1	0.5	0.076	4	0.003358	YP_009093250.1	MNTSNLLMECVKSEKLESGSMYGQFQIQSLMPGQGITIGNLLRRVLLGDLGGTAITGVRIAGIKDEFSLIPGVREDILEILLNLKGIVLKSKISNRQFGRLRLHGPAVITASSIQLSSEVEIINPNHYIATILDTHLLEIEFKIESGIGYRLANELFSDKFEDFIEIDAIFMPVQKVDFKIDNVYDNSATLTERLIIDVWTNGSISPEQAIFSGSKLIRDLFKFVNEQKINKEKEISQEKNSLKPRDPYIHIAIEELQLSVRPYNCLKRAQINTIGDLLEYSPEKLLELKNFGRKSADEVFATLKNKLGIVLK	100	0	gi|700658245|ref|YP_009093250.1|	RNA polymerase alpha subunit (chloroplast) [Roundia cardiophora]	85.62	0	sp|A0T0Z4|RPOA_THAPS	DNA-directed RNA polymerase subunit alpha OS=Thalassiosira pseudonana GN=rpoA PE=3 SV=1	100	0	tr|A0A089VPP6|A0A089VPP6_9STRA	DNA-directed RNA polymerase subunit alpha OS=Roundia cardiophora GN=rpoA PE=3 SV=1	gi|17231683|ref|NP_488231.1|	308	5e-103	COG0202	DNA-directed RNA polymerase, alpha subunit/40 kD subunit	K	Transcription	K03040|1|7e-47|167|ppp:PHYPADRAFT_168194| DNA-directed RNA polymerase subunit alpha [EC:2.7.7.6]	GO:0006351//transcription, DNA-templated	GO:0003899//DNA-directed RNA polymerase activity;GO:0003677//DNA binding;GO:0046983//protein dimerization activity	GO:0009507//chloroplast
299	XP_002289769.1	RL11A, ribosomal protein 11A 60S large ribosomal subunit [Thalassiosira pseudonana CCMP1335]	20263.7	0.198	3	10	EED93306.1	0.42	0.113	4	0.006918	XP_002289769.1	MASEGKKNPMKDIKVDKLILNCCVGESGDRLTRAARVLEQLTGQQPVYSKARYTLRSFGIRRNEKISVHVTVRGEKALEILERGLKVKEYELLQQNFSETGNFGFGINEHIDLGIKYDPTTGIYGMDFFVCLTRPGARVARRKVRQSRVGFAHKIKKEEAIQWFQDKFEGVVLAKAT	100	1e-129	gi|224000193|ref|XP_002289769.1|	RL11A, ribosomal protein 11A 60S large ribosomal subunit [Thalassiosira pseudonana CCMP1335]	72.88	7e-93	sp|Q0DK10|RL11_ORYSJ	60S ribosomal protein L11 OS=Oryza sativa subsp. japonica GN=RPL11 PE=2 SV=1	100	3e-128	tr|B8BZ86|B8BZ86_THAPS	RL11A, ribosomal protein 11A 60S large ribosomal subunit OS=Thalassiosira pseudonana GN=RL11A PE=3 SV=1	gi|332796541|ref|YP_004458041.1|	162	1e-49	COG0094	Ribosomal protein L5	J	Translation, ribosomal structure and biogenesis	K02868|1|3e-94|274|sot:102584982| large subunit ribosomal protein L11e	GO:0006412//translation	GO:0003735//structural constituent of ribosome	GO:0005840//ribosome
300	EED95018.1	RL17A, ribosomal protein 27A 60S large ribosomal subunit [Thalassiosira pseudonana CCMP1335]	16118.7	0.061	1	4	XP_002287575.1	0.51	0.204	4	0.03452	EED95018.1	MPTRLHKGRKKRGHVQMGHGRIGKHRKHPGGRGNAGGQHHHRILFDKYHPGYFGKVGMRQFHQLKNRSFTPTLNIDKLFNVAGEGVYEAAKSASDGKAPVIDLVSKGYFKLLGNGQITVPVIVKAKFFSKLAEQKIKAAGGACLLAA	100	1e-103	gi|223995803|ref|XP_002287575.1|	RL17A, ribosomal protein 27A 60S large ribosomal subunit [Thalassiosira pseudonana CCMP1335]	64.86	1e-64	sp|P18445|RL27A_RAT	60S ribosomal protein L27a OS=Rattus norvegicus GN=Rpl27a PE=1 SV=3	100	3e-102	tr|B8BVY6|B8BVY6_THAPS	RL17A, ribosomal protein 27A 60S large ribosomal subunit OS=Thalassiosira pseudonana GN=RL27A PE=3 SV=1	gi|557693917|ref|YP_008796971.1|	79.3	6e-18	COG0200	Ribosomal protein L15	J	Translation, ribosomal structure and biogenesis	K02900|1|2e-66|201|olu:OSTLU_27402| large subunit ribosomal protein L27Ae	GO:0006412//translation	GO:0003735//structural constituent of ribosome	GO:0005840//ribosome
301	EJK68945.1	hypothetical protein THAOC_09844 [Thalassiosira oceanica]	35033.7	0.089	1	2	-	0.46	0.114	4	0.007513	EJK68945.1	MAGVSGGLLAAEVTRAGGLGFIAAGHFQDITKLEAQIKLYIEASGKPTDLAIGFIGFSSLATQSQWENYDYILRTYRPKAVQFFAPSIVTNDSGGPSNVELAHSYGSKVLAQVGTLKDAREAMRHGVDAIICQGREAGGHGLRREAGNSTLALASQAAQISESTPIVAAGGITKGKHIASALAVGCQAVSIGTRFWACEESIGDETLQKELIKENSCDDVVRTTAFDELNNEISSIKWPKPYDSSGVLRNKITDDWDERPSSDLQHAINHSDLLEQYKAERGQTTSTAIYAGEGVGEVHSIEGAYATLLRLEQETMQAIERLKSL	100	0	gi|397628538|gb|EJK68945.1|	hypothetical protein THAOC_09844 [Thalassiosira oceanica]	27.27	1e-18	sp|Q01284|2NPD_NEUCR	Nitronate monooxygenase OS=Neurospora crassa (strain ATCC 24698 / 74-OR23-1A / CBS 708.71 / DSM 1257 / FGSC 987) GN=ncd-2 PE=1 SV=1	100	0	tr|K0SU46|K0SU46_THAOC	Uncharacterized protein OS=Thalassiosira oceanica GN=THAOC_09844 PE=4 SV=1	gi|568284779|ref|YP_008972866.1|	105	3e-24	COG2070	NAD(P)H-dependent flavin oxidoreductase YrpB, nitropropane dioxygenase family	R	General function prediction only	-		GO:0016491//oxidoreductase activity	-
302	AAZ99426.1	NADH dehydrogenase subunit 7 (mitochondrion) [Thalassiosira pseudonana]	46217.6	0.065	2	2	YP_316619.1;YP_009186128.1;ALO71425.1	0.8	0.1	4	0.0362	AAZ99426.1	MTVKKKNLLKKIKNFTINFGPQHPAAHGVLRLVLELNGEIVNRADPHIGLLHRGTEKLIEYKNYVQALPYFDRLDYVSMMAQEHSYCLAIEKLFNCKIPERAQYIRVLFAEITRILNHLLAVGCHAMDVGAMTPFLWAFEEREKLMEFYERVSGARMHAAYFRPGGLQVDIPKGLLDDIYMFIEQFTLRLTEMEDMLTENRIWKQRLVDIGVVTAKDACQWGFSGVMLRGSGINWDLRKSQPYEVYEKLEFDIPVGTNGDCYDRYLIRVFEMKESLKIIEQCLNLMPAGYVKTNDFKISPPTRVEMKQSMEALIHHFKMYTQGVIIPSNETYIGTEAPKGEFGVYLISDNTNRPYRCKIKAPGFNHLQALDFMSKGHLIADVVTIIGTQDIVFGEVDR	100	0	gi|74325199|ref|YP_316619.1|	NADH dehydrogenase subunit 7 [Thalassiosira pseudonana]	78.65	0	sp|O21270|NDUS2_RECAM	NADH-ubiquinone oxidoreductase 49 kDa subunit OS=Reclinomonas americana GN=NAD7 PE=3 SV=1	100	0	tr|Q3S278|Q3S278_THAPS	NADH dehydrogenase subunit 7 OS=Thalassiosira pseudonana GN=nad7 PE=3 SV=1	gi|339319422|ref|YP_004679117.1|	597	0	COG0649	NADH:ubiquinone oxidoreductase 49 kD subunit (chain D)	C	Energy production and conversion	K03935|1|0.0|659|ota:OstapMp15| NADH dehydrogenase (ubiquinone) Fe-S protein 2 [EC:1.6.5.3 1.6.99.3]	GO:0019684//photosynthesis, light reaction;GO:0055114//oxidation-reduction process	GO:0051287//NAD binding;GO:0048038//quinone binding;GO:0008137//NADH dehydrogenase (ubiquinone) activity	GO:0005886//plasma membrane;GO:0005739//mitochondrion
303	EJK54738.1	hypothetical protein THAOC_25610 [Thalassiosira oceanica]	40177.6	0.075	1	2	-	0.38	0.105	4	0.005479	EJK54738.1	MFFGGGKKRVDEDRTHLNTSPTRLEAVLGEGMGGRPRADVDTTKLYETLGVSQGAAGLSLFTTSHLVHPHMTGRQECQWQGNKEGEQKMRRAVCVVYVLKLAVKHHPDKGGDEQKFKEISAAYEILSDTEKRATYDKYGLEGLSEDGGRSRASGPKKGESVNHPLKVSLEDLYNGKTAKIAINRQVIVGEAKICNTCDGQGVVLELRQIALGMVQQIQRRCTDCGGTGYRATRKKERKILEVLVEKGMKHNEKIQFRGMADEKPNMEAGDVNFIIQEKDHDLFKRKGADLLITKTLSLNEALCGFEWTFKHLDGREIAIKSKPGEVIKPEATSTQPFVKIVPNEVRSDLQHDKTSLFG	100	0	gi|397589637|gb|EJK54738.1|	hypothetical protein THAOC_25610 [Thalassiosira oceanica]	39.94	3e-72	sp|P42825|DNAJ2_ARATH	Chaperone protein dnaJ 2 OS=Arabidopsis thaliana GN=ATJ2 PE=1 SV=2	100	0	tr|K0RM23|K0RM23_THAOC	Uncharacterized protein OS=Thalassiosira oceanica GN=THAOC_25610 PE=4 SV=1	gi|49473744|ref|YP_031786.1|	106	5e-24	COG0484	DnaJ-class molecular chaperone with C-terminal Zn finger domain	O	Posttranslational modification, protein turnover, chaperones	K09503|1|1e-81|258|gsl:Gasu_13240| DnaJ homolog subfamily A member 2		GO:0046872//metal ion binding;GO:0005515//protein binding	-
304	EJK64776.1	hypothetical protein THAOC_14455, partial [Thalassiosira oceanica]	21848.7	0.041	1	2	EJK67306.1	0.7	0.062	4	0.003898	EJK64776.1	LFNERRTNSDGDEITLMAHLVGGSYLLTKLLMPELEKADDPRVIYVASGGMYNTKFPSWEEAASSGKFESKYNGNMAYAYAKRGQVLLAERLASQYPGIKFVSCHPGWTKTEGVDAAYGSQASILEPMRTLWEGSEGICWLATSPSTDLEGGAFYLDRKPQRNIFAGPFFTDGTYTRNTDTEVDDMMKKLLEKVGV	100	3e-146	gi|397618151|gb|EJK64776.1|	hypothetical protein THAOC_14455, partial [Thalassiosira oceanica]	39.76	4e-27	sp|A6QP05|DHR12_BOVIN	Dehydrogenase/reductase SDR family member 12 OS=Bos taurus GN=DHRS12 PE=2 SV=1	100	6e-145	tr|K0SUT5|K0SUT5_THAOC	Uncharacterized protein (Fragment) OS=Thalassiosira oceanica GN=THAOC_14455 PE=4 SV=1	gi|224371907|ref|YP_002606073.1|	95.9	2e-21	COG3427	Carbon monoxide dehydrogenase subunit G	C	Energy production and conversion	K11168|1|4e-27|108|egu:105040303| dehydrogenase/reductase SDR family member 12 [EC:1.1.-.-]	GO:0055114//oxidation-reduction process	GO:0016491//oxidoreductase activity;GO:0000166//nucleotide binding	-
305	EED87992.1	predicted protein [Thalassiosira pseudonana CCMP1335]	12541.1	0.168	1	8	XP_002294632.1	0.65	0.062	4	0.002841	EED87992.1	MMDFIRGSVTGDITEVPGIGPAAAKKLANVEGEEGITNTYQLIGKFLMLKGPDTDTNKVESFEHCEKFWYWLQAMGISAHRSAIVKAIAQKVNGLLPGVYDPDLYEDEDDEEE	100	6e-70	gi|224011958|ref|XP_002294632.1|	predicted protein [Thalassiosira pseudonana CCMP1335]	-	-	-	-	100	2e-68	tr|B8CF00|B8CF00_THAPS	Uncharacterized protein OS=Thalassiosira pseudonana GN=THAPSDRAFT_25662 PE=4 SV=1	-	-	-	-	-	-	-	-	GO:0006281//DNA repair	GO:0003677//DNA binding	-
306	XP_002291490.1	helicase, partial [Thalassiosira pseudonana CCMP1335]	106902	0.029	2	2	EED91597.1	0.69	0.085	4	0.009235	XP_002291490.1	AKVYPFQLDPFQQTAINYVEKNESVLVAAHTSAGKTVVAEYAIAKSLRDGQRVVYTSPIKALSNQKYRDLQEEFEDVGLMTGDITINPSATCLVMTTEILRSMLYRGSEVMREVAWVIYDEVHYMRDKERGVVWEESIILLPHKVRFVFLSATIPNAKQFVNWIAKIHHQPCHVVYTNYRPTPLQHYIFPQGGDGLHLVVDEKGKFREANFQKAMSTLQGGGGTDGAIADAMMDSGGGKGGRGQKRKRGGPAGKGPNSDLHRIVKLVMTRNLNPVIVFSFSKKDCEKYALELKREDYTDEVEKDLITQVYSNAIESLSEDDRTLPQVEALLPLLKRGIGIHHGGLLPILKEIVEILFSEGLIKALFATETFAIGINMPAKTVVFTNTRKFDGKEIRWVT…	100	0	gi|224003637|ref|XP_002291490.1|	helicase [Thalassiosira pseudonana CCMP1335]	51.42	0	sp|P42285|SK2L2_HUMAN	Superkiller viralicidic activity 2-like 2 OS=Homo sapiens GN=SKIV2L2 PE=1 SV=3	100	0	tr|B8C5Z9|B8C5Z9_THAPS	Helicase (Fragment) OS=Thalassiosira pseudonana GN=THAPSDRAFT_34661 PE=4 SV=1	gi|269836934|ref|YP_003319162.1|	378	4e-114	COG4942	Septal ring factor EnvC, activator of murein hydrolases AmiA and AmiB	D	Cell cycle control, cell division, chromosome partitioning	K12598|1|0.0|876|smo:SELMODRAFT_174598| ATP-dependent RNA helicase DOB1 [EC:3.6.4.13]		GO:0003676//nucleic acid binding;GO:0005524//ATP binding;GO:0008026//ATP-dependent helicase activity	-
307	EJK55684.1	hypothetical protein THAOC_24553, partial [Thalassiosira oceanica]	27495.8	0.038	1	1	-	0.49	0.052	4	0.0008386	EJK55684.1	MFRTTAHCDAPPPPPPALPAIGDSAAAKSAAESNSDSSASTSSASAPPPPPEDDAIARAAQSVSSCPNPGPLDMATYDVRRLTSLDTYDGFRCDISKQLSPYFACVHSFHLGTTSLPDGKNASYSFSTNFNDEEGFMMARVDPERGSVDGRIHKALLGGLAMGKIQVSLSSEGQNDMVQGDLDVGAQTWTANLKYGSMGGANMFGCNYLQSVSPRLQMGGEGMYIGANGALMSSYTAKLLFPDGPGADGGDAPAAAAPPQGPPE	100	5e-136	gi|397592488|gb|EJK55684.1|	hypothetical protein THAOC_24553, partial [Thalassiosira oceanica]	29.14	3e-09	sp|P23644|TOM40_YEAST	Mitochondrial import receptor subunit TOM40 OS=Saccharomyces cerevisiae (strain ATCC 204508 / S288c) GN=TOM40 PE=1 SV=1	100	1e-134	tr|K0RTM6|K0RTM6_THAOC	Uncharacterized protein (Fragment) OS=Thalassiosira oceanica GN=THAOC_24553 PE=4 SV=1	-	-	-	-	-	-	-	K11518|1|1e-18|87.4|gsl:Gasu_23460| mitochondrial import receptor subunit TOM40	GO:0055085//transmembrane transport;GO:0044070//regulation of anion transport	GO:0008308//voltage-gated anion channel activity	GO:0005741//mitochondrial outer membrane
308	XP_002293335.1	predicted protein, partial [Thalassiosira pseudonana CCMP1335]	77340.7	0.084	5	6	EED89071.1	0.56	0.201	4	0.04318	XP_002293335.1	LNTSYDRCVILTNLPKVNEAKYEKLSKVVLKLVSRIGNLASYEGSDEFTGFYMPFDKEGDATKGCAFIEYESASDAKKAMEVLDDYKFDKNHSLKVTLHERAAELERVEEGEFTQPEPEPFKERANTMAWLEDSCQRDQFSIRHGNETEVLWCDGKGDPVVDYDGSREKKAGINWCDYYTQWSPKGSYFATLVPNKGVILWGGESFEKLGRFPAPGVDFVSFSPQENYIMTNNNNRNDPNAIKVFSIQSGKLLRAFPLYPKDFLEESANAENVPPPPFQWSFDDKYLARMGKDLISVFETSTMKLLDKRSLACDGIHEFQFSPKANIIAYWAPEHKNQPAHVDLIEIPSRKKLRQKNLFNVSNCQMVWQEGGEYLGVKVTRHTKSKKTLYNNLELFRVN…	100	0	gi|224008753|ref|XP_002293335.1|	predicted protein [Thalassiosira pseudonana CCMP1335]	37.65	6e-143	sp|P55884|EIF3B_HUMAN	Eukaryotic translation initiation factor 3 subunit B OS=Homo sapiens GN=EIF3B PE=1 SV=3	100	0	tr|B8CB59|B8CB59_THAPS	Eukaryotic translation initiation factor 3 subunit B (Fragment) OS=Thalassiosira pseudonana GN=THAPSDRAFT_37187 PE=3 SV=1	-	-	-	-	-	-	-	K03253|1|5e-155|468|pmum:103318763| translation initiation factor 3 subunit B	GO:0006413//translational initiation	GO:0000166//nucleotide binding;GO:0003743//translation initiation factor activity	GO:0005737//cytoplasm
309	XP_002289593.1	ubiquitin-conjugating enzyme [Thalassiosira pseudonana CCMP1335]	17813.4	0.051	1	1	EED93130.1;EJK75098.1	0.78	0.114	4	0.04086	XP_002289593.1	MASNQSLLPRRIVKETQRLIAEPVTGISAIPYADNLRYFAVSIEGPSDSPYERGVFQLELFLPSDYPMAPPKVRFLTKIYHPNVDKLGRICLDILKDKWSPALQIRTVLLSIQALLSAPNPDDPLDNTVAELWKSDEKEALRRAKEFTESFAMVNGGK	100	1e-113	gi|223999841|ref|XP_002289593.1|	ubiquitin-conjugating enzyme [Thalassiosira pseudonana CCMP1335]	73.65	2e-79	sp|P35128|UBE2N_DROME	Ubiquitin-conjugating enzyme E2 N OS=Drosophila melanogaster GN=ben PE=2 SV=1	100	3e-112	tr|B8C0U9|B8C0U9_THAPS	Ubiquitin-conjugating enzyme OS=Thalassiosira pseudonana GN=UBC2 PE=3 SV=1	gi|557694902|ref|YP_008797956.1|	90.1	1e-21	COG5078	Ubiquitin-protein ligase	O	Posttranslational modification, protein turnover, chaperones	K10580|1|5e-83|244|mis:MICPUN_106902| ubiquitin-conjugating enzyme E2 N [EC:2.3.2.23]	GO:0016567//protein ubiquitination	GO:0005524//ATP binding;GO:0004842//ubiquitin-protein transferase activity	-
310	EJK70557.1	hypothetical protein THAOC_08069 [Thalassiosira oceanica]	35480.8	0.157	1	2	-	0.52	0.117	4	0.009422	EJK70557.1	MPFVKIQKSKSYYKRYQVKFRRRREGKTDYRQRKRLCCQAKNKYQSPKYRFVVRFTNRQVICQIAYTLIDGDRILTSASSNELPRYGLSCGLKNYGAAYCTGLLCARRLLQKVGLDDVYEGNDEIDGEVVKTEVGKTTYYVDEVDEDKRPFRALLDVGCKTTSTGCRIFGALKGAADGGLDIPHSEKRFPGYDRDSKEYDADMHRERIFGGHVGEYMEYLEEEDNTKYQEQFAGYIAAGIDADGLEELYEGVHEKIREDPSPSEKKSFTPDKSFKRKAKLTLEQRKAAVQAKKDAKIAELEEDDE	100	0	gi|397632449|gb|EJK70557.1|	hypothetical protein THAOC_08069 [Thalassiosira oceanica]	53.77	4e-99	sp|Q4KTI3|RL5_SUBDO	60S ribosomal protein L5 OS=Suberites domuncula GN=RPL5 PE=2 SV=1	100	0	tr|K0TJ10|K0TJ10_THAOC	Uncharacterized protein OS=Thalassiosira oceanica GN=THAOC_08069 PE=3 SV=1	gi|312137095|ref|YP_004004432.1|	135	2e-37	COG0256	Ribosomal protein L18	J	Translation, ribosomal structure and biogenesis	K02932|1|3e-105|311|smo:SELMODRAFT_154687| large subunit ribosomal protein L5e	GO:0006412//translation	GO:0008097//5S rRNA binding;GO:0003735//structural constituent of ribosome	GO:0005840//ribosome
311	EED93043.1	predicted protein [Thalassiosira pseudonana CCMP1335]	29295.4	0.33	1	4	XP_002289506.1	0.57	0.093	4	0.006045	EED93043.1	MTMANRSKMSIKRRFVADGVFYAELNELLTRELAEDGYAGVEVRTTPHRTEIIIRATKTQNVLGEKGQRIRELTSVVQKRFDFAEGAVELYAERVQNRGLCAQAQAESLKFKLLAGLAVRRACYGVVRFVMEASAKGCEVIVSGKLRGQRAKGMKFGDGYMIKTGHAGQVYTDVAVRHVLMRQGVIGIKVAIMLPHDPKGVQGPKIPLDDVVTILEPKEEPSPESILQAQQAAEAAAAAAAQAALQQQLLAQQQAEMAAAGGAPAVDAGF	100	2e-166	gi|223999667|ref|XP_002289506.1|	predicted protein [Thalassiosira pseudonana CCMP1335]	75.23	7e-115	sp|Q9M339|RS32_ARATH	40S ribosomal protein S3-2 OS=Arabidopsis thaliana GN=RPS3B PE=1 SV=1	100	5e-165	tr|B8C0D4|B8C0D4_THAPS	Uncharacterized protein OS=Thalassiosira pseudonana GN=THAPSDRAFT_28049 PE=4 SV=1	gi|57641471|ref|YP_183949.1|	128	1e-34	COG0092	Ribosomal protein S3	J	Translation, ribosomal structure and biogenesis	K02985|1|3e-121|348|sbi:SORBI_02g038990| small subunit ribosomal protein S3e	GO:0006412//translation;GO:0009651//response to salt stress	GO:0003735//structural constituent of ribosome;GO:0003723//RNA binding	GO:0005730//nucleolus;GO:0022626//cytosolic ribosome;GO:0005773//vacuole;GO:0005886//plasma membrane;GO:0015935//small ribosomal subunit;GO:0009507//chloroplast
312	XP_002294422.1	3-isopropylmalate dehydratase [Thalassiosira pseudonana CCMP1335]	87390.9	0.135	5	9	EED88256.1	0.67	0.074	4	0.005085	XP_002294422.1	MIFRFAAVAATLVLSRSVESFAPHKSFTRPIVSVGASTTSLSAASTLYDKIWSDHVVNDDGLSSLLYIDRHLVHEVTSPQAFEGLRLANRSVRRPDCTLSTVDHNVPTTDRSALVDVASFIEETASRTQVLQLQTNVADFDIPYFGMEDERQGIVHIIGPEQGFTLPGTTCVCGDSHTATHGAFGALAFGIGTSEVEHVLATQTLPQTKAKNMLIRIDGDLLPGVTSKDIILHICSVIGTAGGTGATIEFAGKAIENLSMEARMSISNMAIEAGARAGIIAPDDVTFEYLKGRPMCPSGEDWDRAVEYWRSLKTDEGAVFDKTVVIEAKDIAPTVTWGTSPQDAMPVDGIVPRIDEPGHDEARQAAVKRSLEYIGLEGGEPIEGTPIGKVFIGSCTNGR…	100	0	gi|224010930|ref|XP_002294422.1|	3-isopropylmalate dehydratase [Thalassiosira pseudonana CCMP1335]	61.41	0	sp|P55251|LEUC_RHIPU	3-isopropylmalate dehydratase OS=Rhizomucor pusillus GN=LEUA PE=3 SV=1	100	0	tr|B8CEE0|B8CEE0_THAPS	3-isopropylmalate dehydratase OS=Thalassiosira pseudonana GN=LEU2 PE=3 SV=1	gi|428777661|ref|YP_007169448.1|	641	0	COG0065	Homoaconitase/3-isopropylmalate dehydratase large subunit	E	Amino acid transport and metabolism	K01702|1|0.0|900|mis:MICPUN_96879| 3-isopropylmalate dehydratase [EC:4.2.1.33]	GO:0009098//leucine biosynthetic process	GO:0003861//3-isopropylmalate dehydratase activity;GO:0051539//4 iron, 4 sulfur cluster binding	GO:0009316//3-isopropylmalate dehydratase complex
313	EED91098.1	predicted protein, partial [Thalassiosira pseudonana CCMP1335]	12314.8	0.089	1	1	XP_002290991.1	0.79	0.119	4	0.04843	EED91098.1	LGILFLFDSTLLALGDLLFLTGLTLTIGVSRTLRFFSRKDRIRGIVAFFGGVTLVMLRWPMIGMVAQVYGLIYLFGQFFPIAAASLKDVPVVGSVFRHATVERFFSSFGGGR	100	1e-53	gi|224002639|ref|XP_002290991.1|	predicted protein [Thalassiosira pseudonana CCMP1335]	36.78	7e-17	sp|Q54CL4|GOT1_DICDI	Protein transport protein got1 homolog OS=Dictyostelium discoideum GN=golt1 PE=3 SV=1	100	3e-52	tr|B8C5D4|B8C5D4_THAPS	Uncharacterized protein (Fragment) OS=Thalassiosira pseudonana GN=THAPSDRAFT_19662 PE=4 SV=1	-	-	-	-	-	-	-	-	GO:0016192//vesicle-mediated transport	-	-
314	EJK74458.1	hypothetical protein THAOC_03860 [Thalassiosira oceanica]	34930.3	0.062	1	5	-	0.51	0.079	4	0.003031	EJK74458.1	MANKFKEAFQKMAKNMPKGGGGLPGGGGGRGSGAALAASRAVGSLVVAGGLGYGAYNSVFTVDGGHRAVVYNRIIGMKDVVYGEGLNFNVPWFERPVVYDIRTRPVNLQTLTGSKDLQMVTMGVRVLHKPDPSQLVWMYRHLGKNYDERILPSLMNECAKAVVARYNANELLTKREEVSASISRELSARCAGFHVLLEDVAITHLAFSPEYAKAVEAKQVAQQEAERAKYIVLGAVQEKKTIITRARGEAESAELIGTAVKRNPGFMKLRRIDAAKDIADIVSGSGNRIYLNADSLLLNLLGDADEKFTKSVEGRGGWLRK	100	2e-176	gi|397641076|gb|EJK74458.1|	hypothetical protein THAOC_03860 [Thalassiosira oceanica]	54.27	3e-81	sp|P50093|PHB2_CAEEL	Mitochondrial prohibitin complex protein 2 OS=Caenorhabditis elegans GN=phb-2 PE=1 SV=2	100	5e-175	tr|K0T6M8|K0T6M8_THAOC	Uncharacterized protein OS=Thalassiosira oceanica GN=THAOC_03860 PE=4 SV=1	gi|89897250|ref|YP_520737.1|	135	4e-36	COG0330	Regulator of protease activity HflC, stomatin/prohibitin superfamily	O	Posttranslational modification, protein turnover, chaperones	K17081|1|3e-87|267|vcn:VOLCADRAFT_106045| prohibitin 2			GO:0045271//respiratory chain complex I;GO:0009536//plastid;GO:0005739//mitochondrion;GO:0071944//cell periphery
315	XP_002286654.1	cullin [Thalassiosira pseudonana CCMP1335]	79159.5	0.026	2	2	EED96295.1	0.75	0.024	4	0.0003601	XP_002286654.1	MCTQRSPYNWSRDLYQRHGETIEQYLRTTVLPALENKTGQGGTILLNELKHRWSNHQIMNKWLKKFFTYLDRYYVKHHSLPTLEQAGLSHFKTEIYMHVKDNSTSAIISLIDEEREGEIIEKTLVKSIVELYESMGMGDLNSYTNDLEQPLLDATRSYYGRKREDWIAKDSTPDYLIKVEKALNEEKVRVVEYLNPASEPKLRRVVEDEILQKVQMNLLEKEGSGCRVLLANDKSEDLQRMFQLFSRLENGLQPMATIVENFITAQGNACIDKRQARLDSGEKDKNDDPEFVKSLIDLHEKYLGVIREVFASHHLFQKALKNSFEEIINNDVGQFSNAELMSTFCDRVLKSGGEKLSETEVEQSLDRIVQLFSFLTDKDLFAEIYRNQLAKRLLNQRSA…	100	0	gi|223993941|ref|XP_002286654.1|	cullin [Thalassiosira pseudonana CCMP1335]	44.75	0	sp|Q94AH6|CUL1_ARATH	Cullin-1 OS=Arabidopsis thaliana GN=CUL1 PE=1 SV=1	100	0	tr|B8BQ40|B8BQ40_THAPS	Cullin OS=Thalassiosira pseudonana GN=THAPSDRAFT_267964 PE=3 SV=1	-	-	-	-	-	-	-	K03347|1|0.0|640|ppp:PHYPADRAFT_167405| cullin 1	GO:0006511//ubiquitin-dependent protein catabolic process	GO:0031625//ubiquitin protein ligase binding	GO:0043231//intracellular membrane-bounded organelle;GO:0031461//cullin-RING ubiquitin ligase complex;GO:0044446//intracellular organelle part;GO:0005737//cytoplasm
316	EJK46258.1	hypothetical protein THAOC_35086 [Thalassiosira oceanica]	65130.2	0.141	2	4	-	0.8	0.044	4	0.003957	EJK46258.1	MNKSDGIENVLECSAADAPGSARHNNQRLAPTQENTRLPHTRRLARLRDVDDQSNLQQPIVLSFLRAGIRIFDFDRDSCDMKSIQCYNAMAIPRPIPAAKLTRAGFLYYRALFCHCTALLSEAYWSRQLVKSKSIQNEAFEALLEPSPYRGTQVAGAAGLRSRYFCLDIWQAGSLWEDCRYNSREGFSIEGAIMSGRGFGGRGRGGGRSPGGRGRGGRVTHGFNPMDLPSPGSLSETFLSHLLTRFSSNTSTQRVHDVQLMRATEEEAEAEVGEFSRRDPKVAGAAVVEVAVVVAEEDGGRGGGRYVKSIQLCVVRCRYMGLNLERIEHRGGGMKGGSKVVIEPHRHEGVFIARGKEDALVTLNSTPGVAVYGEKRISVESPPGPDGNAVKVEYRVWNP…	100	0	gi|397568647|gb|EJK46258.1|	hypothetical protein THAOC_35086 [Thalassiosira oceanica]	73.41	5e-128	sp|Q9FEF8|MD36B_ARATH	Probable mediator of RNA polymerase II transcription subunit 36b OS=Arabidopsis thaliana GN=MED36B PE=1 SV=1	100	0	tr|K0R1G3|K0R1G3_THAOC	Uncharacterized protein OS=Thalassiosira oceanica GN=THAOC_35086 PE=3 SV=1	gi|124026934|ref|YP_001012254.1|	216	1e-64	COG1889	Fibrillarin-like rRNA methylase	J	Translation, ribosomal structure and biogenesis	K14563|1|2e-128|379|pper:PRUPE_ppa010543mg| rRNA 2'-O-methyltransferase fibrillarin [EC:2.1.1.-]	GO:0000085//mitotic G2 phase;GO:0016579//protein deubiquitination;GO:0001510//RNA methylation;GO:0016571//histone methylation;GO:0010388//cullin deneddylation;GO:0009640//photomorphogenesis;GO:0016567//protein ubiquitination;GO:0008033//tRNA processing;GO:0000478//endonucleolytic cleavage involved in rRNA processing;GO:0045893//positive regulation of transcription, DNA-templated	GO:0008168//methyltransferase activity;GO:0030515//snoRNA binding	GO:0016020//membrane;GO:0005730//nucleolus;GO:0005829//cytosol
317	EED91861.1	predicted protein, partial [Thalassiosira pseudonana CCMP1335]	35183.3	0.042	1	6	XP_002290109.1	0.6	0.06	4	0.00204	EED91861.1	ASLATLSTLVTNATEEAGDMEVLQAKMDIARYAAKSCTKEEALKAYEEVVALPKLSTGKKMDAFLEMARVASFWGDWKVMRETLDKASKAIAKGGDWDRRNRLKAYQAISHILVRDMESASKLLVDGIATFSCGELCEYSEFITYAVVTSLLYLPRTELKKSIIDGSEILQVAKEIPVVIRLANTLYDCDYTQYLHTIVALQPHLIANRYLQPHAGYLLREFHVLGFKQFLDSYQSVTLESMASSFGVGTEFLDVQLSRFIAAGRLTAKIDKFGGVVETNRPDEKNARYRDMIQKGDLLLNRIQKLGRVVDL	100	0	gi|224000874|ref|XP_002290109.1|	predicted protein [Thalassiosira pseudonana CCMP1335]	41.61	1e-84	sp|Q93Y35|PSMD6_ARATH	26S proteasome non-ATPase regulatory subunit 6 homolog OS=Arabidopsis thaliana GN=RPN7 PE=1 SV=1	100	0	tr|B8C216|B8C216_THAPS	Uncharacterized protein (Fragment) OS=Thalassiosira pseudonana GN=THAPSDRAFT_34018 PE=4 SV=1	-	-	-	-	-	-	-	K03037|1|3e-87|270|ats:F775_07981| 26S proteasome regulatory subunit N7	-	-	-
318	XP_002291980.1	predicted protein [Thalassiosira pseudonana CCMP1335]	57929.9	0.042	2	7	EED90831.1	0.74	0.07	4	0.006852	XP_002291980.1	MRSKEAREKFPQLNDRDIKYCAVFYEGQHNDARTNLAIAMTAAEKGAHISNYVEMKEAILDESGKVIGIKALDRIAGDSFEIYGKNVIFAGGPFTDALREMETDEEVKPAVQGASGSHIVLPGYYAPKDMGLLDYNTSDGRFLFFLPWQGSVLVGTTDKKCAPETSPHPPEDEIQWMLKECEKYLSPSLKVRRSDVLSAWRGWRPLAADPHRPPGGQVSRDHVISTNPKSGVTFIAGGKWTTWREMAEDVLDKTLGDNHPKCNTLDIMLHGGDGYSESLSIELIQKYGLDQRVAEHLVKTYGGRVWEVAERCAPTGKVWPRYGIPLASSYPYIEAEVRFACQEYACTVEDILSRRTRIAFLNKDAATQMLPRVADIMAEELGWSKKVKAAQIKAAEEYL…	100	0	gi|224006039|ref|XP_002291980.1|	predicted protein [Thalassiosira pseudonana CCMP1335]	41.8	6e-131	sp|A7DZP8|GPDM_MESAU	Glycerol-3-phosphate dehydrogenase, mitochondrial OS=Mesocricetus auratus GN=GPD2 PE=1 SV=1	100	0	tr|B8C6M7|B8C6M7_THAPS	Uncharacterized protein OS=Thalassiosira pseudonana GN=THAPSDRAFT_41505 PE=4 SV=1	gi|313680691|ref|YP_004058430.1|	297	6e-93	COG0578	Glycerol-3-phosphate dehydrogenase	C	Energy production and conversion	K00111|1|1e-91|295|bvg:104884254| glycerol-3-phosphate dehydrogenase [EC:1.1.5.3]	GO:0055114//oxidation-reduction process	GO:0016491//oxidoreductase activity;GO:0005509//calcium ion binding	GO:0044444//cytoplasmic part
319	EED94242.1	predicted protein [Thalassiosira pseudonana CCMP1335]	69862.6	0.017	1	1	XP_002288806.1	0.82	0.101	4	0.0444	EED94242.1	MSTSNNTAAEADDAASATDNSTITQQQQQPDPELEEDLKEAGEVFNSLFSTRRPKDGWAGISSGLKSIGKGTVAGVASLIAQPIAGAHENGVKGFFGGLATGVASCVALPLTGVCVGAYQVGRGVANSVEAMNASKQGMQWDNEKREWIFYFLEKDKEEVERLEAELQQKGGKTGSGSGGTTASGGAAKADLNEKKVKDRQFYDLLGVSTNATAGEIKKAYYKEARKCHPDKCPGDDQAAAKFQALGHAYQILSNEQTRAAYDKNGPPESNSADANLANEIDPLVFFAVMFGSHLVEPYIGELWIATTADTMMKDAMEQQKEIDLENMTEEEAAQFLAGKTSGNAEMMLKQRKREVKCALNLREKIMPYLEAKDEDDRTAFKVAIQKEAKKIADTSFGA…	100	0	gi|223998266|ref|XP_002288806.1|	predicted protein [Thalassiosira pseudonana CCMP1335]	28.95	4e-33	sp|Q8GYX8|DNJ10_ARATH	Chaperone protein dnaJ 10 OS=Arabidopsis thaliana GN=ATJ10 PE=2 SV=2	100	0	tr|B8BXP2|B8BXP2_THAPS	Uncharacterized protein OS=Thalassiosira pseudonana GN=THAPSDRAFT_21734 PE=4 SV=1	gi|470178320|ref|YP_007564364.1|	81.6	1e-14	COG0484	DnaJ-class molecular chaperone with C-terminal Zn finger domain	O	Posttranslational modification, protein turnover, chaperones	K09529|1|2e-15|80.9|vvi:100265910| DnaJ homolog subfamily C member 9!K03686|5|6e-15|81.6|obr:102723063| molecular chaperone DnaJ	GO:0006457//protein folding	GO:0031072//heat shock protein binding;GO:0051082//unfolded protein binding	-
320	EJK58406.1	hypothetical protein THAOC_21471 [Thalassiosira oceanica]	109524	0.049	3	11	-	0.79	0.074	4	0.01537	EJK58406.1	MINSSVLKATRLAMPAMAAAAGYSYGESAGRADGAVGDGAVATFRRSTKLGASYTLCEKGTVLDVLNEIKRKVDKLEEAIGIGEGGASTTAQTSESGFTSDAAGAEKVLPGIDVVLGSQWGDEGKGKLVDMLSQEYDVCARVAGGSNAGHTIVVDGKKYKFHLLPSGILNDKATCVIGNGVVIHLPSFLKEIDGLESSGINSEGRLLISDRAHIVFDFHQAVDGMNEKKLGRNKIGTTKKGIGPAYASKISRNGLRIGDLQNFDFFEMRFRELAAASMRAFPGLEIDVEGQLAYYKSIAPRVGAMTTDTIEYTNEQYSMGKKILIEGANATMLDIDFGTYPYVTSSNPSIGSVLTGLGVSPKKLNGIYGTTKAYCTRVGEGPFPTELDRDAGIGEHLGV…	100	0	gi|397603399|gb|EJK58406.1|	hypothetical protein THAOC_21471 [Thalassiosira oceanica]	68.21	0	sp|B7FUM7|PURA_PHATC	Adenylosuccinate synthetase OS=Phaeodactylum tricornutum (strain CCAP 1055/1) GN=PHATRDRAFT_26256 PE=3 SV=1	100	0	tr|K0SBU2|K0SBU2_THAOC	Adenylosuccinate synthetase OS=Thalassiosira oceanica GN=THAOC_21471 PE=3 SV=1	gi|269123114|ref|YP_003305691.1|	405	2e-130	COG0104	Adenylosuccinate synthase	F	Nucleotide transport and metabolism	K01939|1|4e-168|504|csl:COCSUDRAFT_47829| adenylosuccinate synthase [EC:6.3.4.4]	GO:0044208//'de novo' AMP biosynthetic process	GO:0004019//adenylosuccinate synthase activity;GO:0000287//magnesium ion binding;GO:0005525//GTP binding	GO:0009536//plastid
321	EED87624.1	predicted protein [Thalassiosira pseudonana CCMP1335]	98716.3	0.008	1	1	XP_002294844.1	0.46	0.096	4	0.004866	EED87624.1	MSLATSGGAGAGLAGGGLSAAAMAHGGPNAALATHTPPHNAQYSSIPNSSGAAAPPGTSYAALGADLLDKNQSFLNGKNVRGVSALPIVGVDLYGDGCGVGYFGPMEKEEDGGKDDPDGGEMAAMMKAMQKVKAGTLAKSIGNFNGTIGTNVILKKENDKSYKAVKKYLTKGAAEGCGGVLNEALVVDGKEINEDEENNNTVVVIPRPHLLMGARKLSEINPAAKCTFQSILPKNNKDDDDNNNNNNNSPVIDQDNSTSSISLTTIALDGNSRPKGDDYDRVAFQLRLNSKKKLMTMLPEEAVGLIIASCRKNVRDAYIEQHPESELNPQNAEDPEEEELGYMDYPPAFAIPGWACLDATLEALIDAAGGRASICGPSLHQRSIAACVGALLPPPVSAN…	100	0	gi|224012383|ref|XP_002294844.1|	predicted protein [Thalassiosira pseudonana CCMP1335]	-	-	-	-	100	0	tr|B8CFG3|B8CFG3_THAPS	Uncharacterized protein OS=Thalassiosira pseudonana GN=THAPSDRAFT_25708 PE=4 SV=1	-	-	-	-	-	-	-	-	-	-	-
322	EED94299.1	sec14p-like protein, partial [Thalassiosira pseudonana CCMP1335]	25206.7	0.037	1	2	XP_002288863.1;EJK65049.1	0.61	0.115	4	0.01259	EED94299.1	LTRWLRARKFKYDDVISMIEEATEVRADARKHDFYPDPSEALGCEPSVFQAQYPQLYHGHAKNGCPVFISKPGILNVDGMECITTLDGILKFHWHVMMHDYKMRLLKHKEAHPNFTRFECVVVIDLDHLSTSQLSQRALSIVKTQTAIDSVCFPETMNRTLVINAPRFFSMTWSIIKGWIDPRTAGKIELISSRKNWESRLRELVDEEQLPSDYGG	100	3e-164	gi|223998380|ref|XP_002288863.1|	sec14p-like protein [Thalassiosira pseudonana CCMP1335]	28.96	6e-25	sp|F4JLE5|SFH1_ARATH	Phosphatidylinositol/phosphatidylcholine transfer protein SFH1 OS=Arabidopsis thaliana GN=SFH1 PE=2 SV=1	100	9e-163	tr|B8BY16|B8BY16_THAPS	Sec14p-like protein (Fragment) OS=Thalassiosira pseudonana GN=THAPSDRAFT_261826 PE=4 SV=1	-	-	-	-	-	-	-	K02433|1|6e-20|91.3|apro:F751_6020| aspartyl-tRNA(Asn)/glutamyl-tRNA(Gln) amidotransferase subunit A [EC:6.3.5.6 6.3.5.7]!K19996|2|1e-07|54.7|smo:SELMODRAFT_65145| phosphatidylinositol transfer protein SFH5	-	-	-
323	EED87429.1	hypothetical protein THAPSDRAFT_270116 [Thalassiosira pseudonana CCMP1335]	164019	0.015	2	3	XP_002295125.1	0.67	0.064	4	0.003564	EED87429.1	MGVVRAVSSLTDPSAKVKMDLPVLKILLGFLIAFGLGDGNEDVRNESRNAARDIVAYYGSSEDVISFFLPQFESVLTTGKADENIAASDYRKEGVVVSLGSIALHLNDDADADKIDDIIDMLLNALKTPSEDVQASVALCLSKLMKKGRTQARIETLLNNLMDECINGQSLASQRGAAYGISAAVKGSGIASLKKFDVVKRLEESCTSGSPPNKEGSLFAIELLSSRLGILFEPYVIVLLPALLKAFSDSNDHVRTAADKTVGLIMSKLSGHGVKLVMPAVLEAFDEPEWRTKQASIHMLGSMSHCAPKQLASCLPKVVPKLTEAFSDTHPKVKNSAESALEELCKVIKNPEISSISTILLKALTDPASGTVHALESLISTEFVHAIDAPSLSIIIPVV…	100	0	gi|224012946|ref|XP_002295125.1|	hypothetical protein THAPSDRAFT_270116 [Thalassiosira pseudonana CCMP1335]	40.02	0	sp|F4I893|ILA_ARATH	Protein ILITYHIA OS=Arabidopsis thaliana GN=ILA PE=1 SV=1	100	0	tr|B8CG53|B8CG53_THAPS	Uncharacterized protein OS=Thalassiosira pseudonana GN=THAPSDRAFT_270116 PE=4 SV=1	gi|113474652|ref|YP_720713.1|	65.5	1e-08	COG5635	Predicted NTPase, NACHT family domain	T	Signal transduction mechanisms	K03235|1|1e-46|187|olu:OSTLU_36160| elongation factor 3	-	-	-
324	XP_002296690.1	urease, urea [Thalassiosira pseudonana CCMP1335]	86331.1	0.011	9	11	EED86891.1	0.93	0.037	4	0.5152	XP_002296690.1	MQMMEMVRNGQGTVSDLMSIGTQLLGRNQVLPGVAALVRDVQVEATFPDGTKLLTVHDPIGREDGDLELALEGSFLPVPDLSVFRQVMVSPTLPPIEINAVSSDGCPEGPHLVEIPVTNTGDRPIQVGSHYPFLETNAALVFDRKAALGRRLNVPSGASVRFEPGETKTVTLVNLGGKRNVVCGNGLTAGVADGDRWGEIEKRMEEKGGFGNVSSAKVPEGKPYVLTRSAYSDAYGPTTGDRVRLGDTSLIARIQADHTHYGDECKFGGGKSLREGMGQMTSVSASLALDCVITNAMIIDAKLGIIKADIGIKGNKIHNIGKAGNPDTMNGVTLTPGKEMIVGATTDVIAGEKMIVTAGGVDTHIHFICPQQCDEAIASGVTTMFGGGTGPSAGTSATT…	100	0	gi|224014054|ref|XP_002296690.1|	urease, urea [Thalassiosira pseudonana CCMP1335]	59.41	0	sp|Q9SR52|UREA_ARATH	Urease OS=Arabidopsis thaliana GN=URE PE=3 SV=1	100	0	tr|B8LCG0|B8LCG0_THAPS	Urease OS=Thalassiosira pseudonana GN=URE PE=3 SV=1	gi|521179165|ref|YP_008162906.1|	776	0	COG0832	Urease beta subunit	E	Amino acid transport and metabolism	K01427|1|0.0|908|brp:103852409| urease [EC:3.5.1.5]	GO:0019627//urea metabolic process	GO:0009039//urease activity;GO:0016151//nickel cation binding	GO:0005737//cytoplasm
325	XP_002287546.1	phosphate transport protein [Thalassiosira pseudonana CCMP1335]	31783	0.083	2	5	EED94989.1	0.85	0.11	4	0.1817	XP_002287546.1	MMYYLKGAAAGGICCSITHGALCPVDVVKTRVQLDPVKYNSGLIGGMRQVVAEEGAMALTTGLGATAFGYFVQGWFKFGGVEFFKIQAVSAMGEEKAWNNKTQIYLGAAAAAEFIADIFLCPLEAVRIRSVSDPEFCDGLVDGFGKMLKADGIGGFYSGFLPILAKQIPYTMAKFAVQGEAADAIYASMGSSPKDLSSSTNLGISLASGVIAGVAAAVISHPADTLLSKINKKGAGGDGPMMTRLANIAKEVGFVNLCTVGLLPRCVMIGTLTAGQFGIFDTVMSALGASKFHFHDPNESH	100	0	gi|223995745|ref|XP_002287546.1|	phosphate transport protein [Thalassiosira pseudonana CCMP1335]	51.93	7e-75	sp|P23641|MPCP_YEAST	Mitochondrial phosphate carrier protein OS=Saccharomyces cerevisiae (strain ATCC 204508 / S288c) GN=MIR1 PE=1 SV=1	100	0	tr|B8BVT0|B8BVT0_THAPS	Phosphate transport protein OS=Thalassiosira pseudonana GN=PTP1 PE=3 SV=1	-	-	-	-	-	-	-	K15102|1|7e-133|382|mpp:MICPUCDRAFT_30402| solute carrier family 25 (mitochondrial phosphate transporter), member 3	GO:0055085//transmembrane transport		GO:0016021//integral component of membrane
326	XP_002286746.1	hypothetical protein THAPSDRAFT_1326 [Thalassiosira pseudonana CCMP1335]	45770.7	0.181	7	29	EED96387.1	1.32	0.147	4	0.03299	XP_002286746.1	MTRGLSTSRVVADSVFAPVGRVAGTQLEAAKQTPHGGTLVDLILKTDAEKEAAIAKCSKELQLTPRQLCDVELIMNGGFSPLTSFMDESTYKHVVDNVALPDGLIFGLPVVFDTDDEDLQPGDMVLLKDGDRAIATVEFTDKYMPNKAYECKQCYGTSEIEHPGSLMVATERGKYYMGGKITGLNLPIRDFPCKTPAEVRETLPDDVDVVAFQCRNPVHRAHYELFTRALDDPLVGEGGVVLVHPTCGPTQADDIPGVVRYKTYEVLKEETHNDRTRWEYLPYSMHMAGPREAIQHMMIRKNFGCTHFIIGRDMAGSKSSVTGEDYYGAYDAQDFAKEKGPELGVTPVPSLNLVYTEEEGYVTADEAKERGLNEKKLSGTKFRQMLRGGEDIPEWFAFK…	100	0	gi|223994125|ref|XP_002286746.1|	hypothetical protein THAPSDRAFT_1326 [Thalassiosira pseudonana CCMP1335]	39.47	2e-85	sp|P78937|MET3_SCHPO	Sulfate adenylyltransferase OS=Schizosaccharomyces pombe (strain 972 / ATCC 24843) GN=sua1 PE=1 SV=2	100	0	tr|B8BQL7|B8BQL7_THAPS	Uncharacterized protein OS=Thalassiosira pseudonana GN=THAPSDRAFT_1326 PE=4 SV=1	gi|427703138|ref|YP_007046360.1|	505	5e-178	COG2046	ATP sulfurylase (sulfate adenylyltransferase)	P	Inorganic ion transport and metabolism	K00958|1|0.0|538|csl:COCSUDRAFT_66886| sulfate adenylyltransferase [EC:2.7.7.4]	GO:0000103//sulfate assimilation	GO:0004781//sulfate adenylyltransferase (ATP) activity	-
327	EED88796.1	phosphoadenosine-phosphosulphate reductase [Thalassiosira pseudonana CCMP1335]	49384.2	0.192	6	33	XP_002293787.1	1.24	0.067	4	0.2289	EED88796.1	MKFIALFALISTTSVSGFAPSTRAMVNSRTTSTAVISQSSTSLQMADDAKIFDQESFIAESKEMRLKHLEEQAMFALKIAVENYGNAVFPNALIAGDSVITHLLHRMGYLKDGQAKVMVVDTFHLFPETMEFLREIEDFYGFKAEIFCAEGVPVGDKAAYDKKYGADLWKEDIEQYDKVCKVEPFQRGLKTLNTDCMINGRTRWQGFERAWIDQFENAPIGGGLAKCNPIAYWTLEDTFDYIAKYEVPHHPLHAKGYPSIGDAKDTIPIPEDGSTRFVNFKFEGDKTPWLDYASERKGRFVGLANKDGSTKTECGIHVAGAERTFDRDLWESGAVKNIESNDEALEIIKSGKEAIVAVYAPWCQFCQGMEEEFAKYAESAGVPVYKFRGDEERDFVSAN…	100	0	gi|224009658|ref|XP_002293787.1|	phosphoadenosine-phosphosulphate reductase [Thalassiosira pseudonana CCMP1335]	32.27	1e-28	sp|P56859|MET16_EMENI	Phosphoadenosine phosphosulfate reductase OS=Emericella nidulans (strain FGSC A4 / ATCC 38163 / CBS 112.46 / NRRL 194 / M139) GN=sA PE=3 SV=3	100	0	tr|B8CCL3|B8CCL3_THAPS	Phosphoadenosine-phosphosulphate reductase OS=Thalassiosira pseudonana GN=THAPSDRAFT_24887 PE=4 SV=1	gi|428206895|ref|YP_007091248.1|	136	1e-35	COG0175	3'-phosphoadenosine 5'-phosphosulfate sulfotransferase (PAPS reductase)/FAD synthetase or related enzyme	EH	Amino acid transport and metabolism;Coenzyme transport and metabolism	K00390|1|2e-91|283|ppp:PHYPADRAFT_123215| phosphoadenosine phosphosulfate reductase [EC:1.8.4.8 1.8.4.10]!K05907|5|5e-30|124|csv:101220567| adenylyl-sulfate reductase (glutathione) [EC:1.8.4.9]	GO:0045454//cell redox homeostasis;GO:0008152//metabolic process	GO:0003824//catalytic activity	-
328	EED93364.1	predicted protein [Thalassiosira pseudonana CCMP1335]	76705.2	0.1	6	25	XP_002289827.1	1.36	0.049	4	0.001103	EED93364.1	MNKRLYYNSDTKADSSIPRHHFSSLQAGDTSTQDLWCTTFNTHCTHTIAMKFSPAVTLALAAAFPTAAAFVTCPSRHAATIGTSSTSSTRLNVQLEAPKKDLPKIEKLKIASNYLREPLGEQLATEEIGISKDAYQILKYHGSYQQNNRETRGPKDYQFMLRLKQPAGELPPDLYRLLDDLSSKHGQGDLRATTRQCFQIHGILKGDLKTVISSIMNMGSSTVGACGDVSRNVMTTPAPFDTPAYNYAREYSKVFAQLFRPMSTAFSEIWLDGEKAASVETWAKEVEHHNVDEAMLYDSGRGIILPDSTEPIYGTQYLPRKFKIGVTVPGDNSLDIYTNDIGVVVICNDAGELEGFNVMVGGGMGRTHNKENTFARAADHMGFVPKEDIMEVMKAIVAA…	100	0	gi|224000309|ref|XP_002289827.1|	predicted protein [Thalassiosira pseudonana CCMP1335]	53.6	0	sp|P30008|SIR_SYNE7	Sulfite reductase [ferredoxin] OS=Synechococcus elongatus (strain PCC 7942) GN=sir PE=3 SV=2	100	0	tr|B8BZI8|B8BZI8_THAPS	Uncharacterized protein OS=Thalassiosira pseudonana GN=THAPSDRAFT_270365 PE=4 SV=1	gi|479127141|ref|YP_005067101.1|	652	0	COG0155	Sulfite reductase, beta subunit (hemoprotein)	P	Inorganic ion transport and metabolism	K00392|1|0.0|691|ccp:CHC_T00008525001| sulfite reductase (ferredoxin) [EC:1.8.7.1]	GO:0019219//regulation of nucleobase-containing compound metabolic process;GO:0055114//oxidation-reduction process;GO:0006259//DNA metabolic process;GO:2000112//regulation of cellular macromolecule biosynthetic process	GO:0050311//sulfite reductase (ferredoxin) activity;GO:0003677//DNA binding;GO:0051539//4 iron, 4 sulfur cluster binding;GO:0020037//heme binding	GO:0042644//chloroplast nucleoid
329	EED89002.1	serine hydroxymethyltransferase [Thalassiosira pseudonana CCMP1335]	53288.9	0.055	2	6	XP_002293993.1	0.47	0.146	4	0.01483	EED89002.1	MSDSNKRAKMTSFKDSEFTGLKPLSEHDPLLFDLIEKEKLRQYTSLELIASENFTSRAVMDCLGSALTNKYSEGLPHARYYGGNEIVDQVEELCQKRALEAYGLDEKEWGVNVQPYSGSPANFAVYTGLLRPHDRIMGLDLPSGGHLTHGFYTYSKKEGTRKAVSATSVYFESLPYQVDQTTGIINYDQLERDASLFKPAMIIAGGSAYPRDWDYARFRKIADENGALLIMDMAHISGLVATKEQKSPFEYCDVVTTTTHKSLRGPRAGMIFFRRDERGFEHKINQAVFPALQGGPHEHQIAGVATQLLEVMTPEFHQYSAQVRKNAQALGNKLISLGYSLATGGTENHLVLWDLKPQKLTGSKFEKVCDAVSITLNKNCVPGDRSAVTPGGVRIGAPA…	100	0	gi|224010070|ref|XP_002293993.1|	serine hydroxymethyltransferase [Thalassiosira pseudonana CCMP1335]	63.03	0	sp|O23254|GLYC4_ARATH	Serine hydroxymethyltransferase 4 OS=Arabidopsis thaliana GN=SHM4 PE=1 SV=1	100	0	tr|B8CCS6|B8CCS6_THAPS	Serine hydroxymethyltransferase OS=Thalassiosira pseudonana GN=THAPSDRAFT_26031 PE=3 SV=1	gi|291288227|ref|YP_003505043.1|	373	1e-124	COG0112	Glycine/serine hydroxymethyltransferase	E	Amino acid transport and metabolism	K00600|1|0.0|633|bpg:Bathy06g02150| glycine hydroxymethyltransferase [EC:2.1.2.1]	GO:0006730//one-carbon metabolic process;GO:0032259//methylation;GO:0019264//glycine biosynthetic process from serine	GO:0030170//pyridoxal phosphate binding;GO:0008168//methyltransferase activity;GO:0004372//glycine hydroxymethyltransferase activity	GO:0005737//cytoplasm
330	EJK50290.1	hypothetical protein THAOC_30762 [Thalassiosira oceanica]	63991.9	0.025	1	2	-	1.38	0.165	4	0.01339	EJK50290.1	MLSKLQQECWDGYVATGRGCHTLFQLLDTDSSGTVSWQEIRFFLENVRENDVNPEARKQVLEAVADGPIGFNEFQSWLIKGTKIDRDMKNEVATGNYQESLGNPRPDDAEHSWNRHTMSQNLRRMQYAVRGEVVIKADAMAKKGKKIIYTNIGNPHAVGQKPITYYRQVISLCDLPAECGIANPTISSVFPEDVVVRAIEMREAIGPAGTGAYTNSQGIGKFRDDIAKFITARDGHLSLPSNIFLTNGASAAIESVLTGLIGNNRDAVMIPIPQYPIYSAIISRLGARQVRYYLDEDNGWAITEQELEERRAAAVERNGLNIRALTLINPGNPTGQVLSREDVETICKFCAKHDIVLLSDEVYQRNIYVDTKEFVSAKKVAVETPGCENLQLISFHSTS…	100	0	gi|397576495|gb|EJK50290.1|	hypothetical protein THAOC_30762 [Thalassiosira oceanica]	44.63	1e-142	sp|Q9LR30|GGT1_ARATH	Glutamate--glyoxylate aminotransferase 1 OS=Arabidopsis thaliana GN=GGAT1 PE=1 SV=1	100	0	tr|K0RAQ9|K0RAQ9_THAOC	Uncharacterized protein OS=Thalassiosira oceanica GN=THAOC_30762 PE=4 SV=1	gi|337285419|ref|YP_004624892.1|	187	6e-52	COG0436	Aspartate/methionine/tyrosine aminotransferase	E	Amino acid transport and metabolism	K14272|1|7e-143|425|bdi:100844005| glutamate--glyoxylate aminotransferase [EC:2.6.1.4 2.6.1.2 2.6.1.44]	GO:0009750//response to fructose;GO:0031348//negative regulation of defense response;GO:0009853//photorespiration;GO:0009611//response to wounding;GO:0042744//hydrogen peroxide catabolic process;GO:0006833//water transport;GO:0009862//systemic acquired resistance, salicylic acid mediated signaling pathway;GO:0009651//response to salt stress;GO:0009625//response to insect;GO:0006751//glutathione c…	GO:0004021//L-alanine:2-oxoglutarate aminotransferase activity;GO:0008453//alanine-glyoxylate transaminase activity;GO:0030170//pyridoxal phosphate binding;GO:0047958//glycine:2-oxoglutarate aminotransferase activity;GO:0016756//glutathione gamma-glutamylcysteinyltransferase activity	GO:0048046//apoplast;GO:0016020//membrane;GO:0009505//plant-type cell wall;GO:0005773//vacuole;GO:0009507//chloroplast;GO:0005777//peroxisome;GO:0005829//cytosol;GO:0009506//plasmodesma
331	ACI64844.1	predicted protein [Thalassiosira pseudonana CCMP1335]	72159.6	0.015	1	2	XP_002296127.1	0.78	0.117	4	0.0412	ACI64844.1	MGGALGGDGPEVTWSDFYNYMLTEGDVERIMVINKKVARVYLRPGAREQSPSSGYPRSALGSVTGRQQHQLVYHFNIGSVESFEDKLARSQQELNISPRDYVPVQYASETNWAMELVKSAPALFLIGLTAYMLRGMGGMPGGGGGGRGGIGGMFQMGKSNAKLIKKEDVSVNFSDVAGCQEAKKEIMEFVEFLQDATQFTKLGAKIPKGALLTGPPGTGKTLLAKAVAGEANVPFYTISGSDFLEMFVGVGPSRVRDLFKEARANAPCIVFIDEIDAVGRQRGRGGFGGGNDERENTLNQLLVEMDGFSPSTGVVVLAGTNRVDILDKALTRPGRFDRQITVDLPDLKGRKEVFLIHLKGIKLDGDAEDVAGRLAGLTPGFAGADIANICNEAAIVAAR…	100	0	gi|224004952|ref|XP_002296127.1|	predicted protein [Thalassiosira pseudonana CCMP1335]	56.13	0	sp|Q0DHL4|FTSH8_ORYSJ	ATP-dependent zinc metalloprotease FTSH 8, mitochondrial OS=Oryza sativa subsp. japonica GN=FTSH8 PE=3 SV=1	100	0	tr|B5YMP7|B5YMP7_THAPS	Predicted protein OS=Thalassiosira pseudonana GN=THAPS_41306 PE=3 SV=1	gi|436836252|ref|YP_007321468.1|	633	0	COG0465	ATP-dependent Zn proteases	O	Posttranslational modification, protein turnover, chaperones	K08956|1|0.0|638|egu:105056920| AFG3 family protein [EC:3.4.24.-]	GO:0006200//ATP catabolic process;GO:0006508//proteolysis;GO:0030163//protein catabolic process	GO:0008270//zinc ion binding;GO:0004222//metalloendopeptidase activity;GO:0005524//ATP binding;GO:0016887//ATPase activity	GO:0016021//integral component of membrane
332	EED95313.1	predicted protein [Thalassiosira pseudonana CCMP1335]	66380.9	0.015	1	1	XP_002287870.1;EJK57822.1	0.59	0.043	4	0.0006714	EED95313.1	MVAVNPLHAVALAVLPSAAYAFVSPTPVVLSPSSARVTPLSGAPYCTSYRVRHSHSFPTTSIQSRTTSSTIFASASNPTLTPTSQDTCDVLVLGSGPAARSIATLLSSKANDKAYDVLLADSNYDRRWAPNYGVWQDEWQSICKLYESFNQPIGNEVIDRLWMSTDCFFGGSFDIAAEQRMRLDRPYCRIERDVLRRVLSPASECTSVNIYSPSGSMVHDESGTSVLIQSKDGDISQVRAKLVVDCTGHESKIVLKDDRMKSIPPGFQIAYGILAEVDETSIPNNDFCGPYFKEAMTLFDYRTDHFPEGSNELAKAEKAPTFMYAMPLNGNRIFFEETSLVARPALSFQECKDRCMTRLEHLGITVTKVEEEEFCYIPMGGPLPAKDQRVIGFGGAAAM…	100	0	gi|223996393|ref|XP_002287870.1|	predicted protein [Thalassiosira pseudonana CCMP1335]	35.37	1e-73	sp|Q43415|LCYB_CAPAN	Lycopene beta cyclase, chloroplastic/chromoplastic OS=Capsicum annuum GN=LCY1 PE=2 SV=1	100	0	tr|B8BUM8|B8BUM8_THAPS	Uncharacterized protein OS=Thalassiosira pseudonana GN=THAPSDRAFT_270357 PE=4 SV=1	gi|297624646|ref|YP_003706080.1|	201	1e-56	COG0654	2-polyprenyl-6-methoxyphenol hydroxylase and related FAD-dependent oxidoreductases	HC	Coenzyme transport and metabolism;Energy production and conversion	K06443|1|2e-75|249|obr:102712228| lycopene beta-cyclase [EC:5.5.1.19]	GO:0016117//carotenoid biosynthetic process	GO:0016705//oxidoreductase activity, acting on paired donors, with incorporation or reduction of molecular oxygen	-
333	EJK76877.1	hypothetical protein THAOC_01331 [Thalassiosira oceanica]	41819.3	0.075	1	2	-	0.56	0.082	4	0.004169	EJK76877.1	MLDASKFEIVMAGLKWCQGKPIINSISLKVGEELFIEQATLLKKHGAAVVVMAFDEEGQAATADEKVRICKRSYDVLVNKVKFPPEDIVFDPNVLTIGTGMEEHANYGVDFINATKIIKEQCPYVKISGGISNLSFGFRGVMKIRESIHSVFLQNAILESGMDVGIVNAHEMLMLNEVEPDIREAAENLVFNKTEDATDVMLELTKREKDRREALKKGGGATKKKQTSWRTENVTKRLEHSLINGISQYIDEDVEEARKEAERPLHIIEGPLMDGMNIIGDLFGAGKMFLPQVIKSARVMKKAVAYLIPFMEKEKREKMIAEGKDPDAIDEDDDSQFAGMTYFISDCKNPDLTRSFFSRQGPYGDGERRRS	100	0	gi|397645542|gb|EJK76877.1|	hypothetical protein THAOC_01331 [Thalassiosira oceanica]	55.52	5e-118	sp|Q54P92|METH_DICDI	Methionine synthase OS=Dictyostelium discoideum GN=mtr PE=3 SV=1	100	0	tr|K0TQY9|K0TQY9_THAOC	Uncharacterized protein OS=Thalassiosira oceanica GN=THAOC_01331 PE=4 SV=1	gi|154252845|ref|YP_001413669.1|	390	4e-127	COG1410	Methionine synthase I, cobalamin-binding domain	E	Amino acid transport and metabolism	K00548|1|2e-113|363|mis:MICPUN_105867| 5-methyltetrahydrofolate--homocysteine methyltransferase [EC:2.1.1.13]	GO:0042558//pteridine-containing compound metabolic process;GO:0009086//methionine biosynthetic process;GO:0032259//methylation	GO:0008705//methionine synthase activity;GO:0031419//cobalamin binding;GO:0008898//S-adenosylmethionine-homocysteine S-methyltransferase activity;GO:0008270//zinc ion binding	GO:0005622//intracellular
334	EED95483.1	proline dehydrogenase, partial [Thalassiosira pseudonana CCMP1335]	61817.9	0.022	1	2	XP_002288040.1;EJK60781.1	0.68	0.134	4	0.02781	EED95483.1	FSDPASAHGTKSTTEIIRSIAVFQACRIPFLVKNAERLLDLSSKVLGNTITNTLMKYTFFRHFCAGEDSVDMKPVIDKLQANNIGPILDYAAESEGSDDGDDVPAIVFEGKRCYILYNMHLYLQIWYQQQYSFLSPTGISTQPLFNQPARIYDYTTEKECDRHVEIFKNCIRSVRDVSPHGFAALKVTALGNPELLERMSTIIVEVKKFFALMDEKKSGFITREEFLTCYDRHFHREDQDALSEVLDFLDADNTGMIDYISFAKMLTPYTLPSFTLKCKDVGPLAMATPSVDEIALMVKMSERLNTLAEEAAACGTKLLIDAEHAKYQPAIDSLVLELQQKFNAKDVTDRPVIFNTYQCYLKDMPERMITDLKRSERYNFHFAAKLVRGAYMVHERERA…	100	0	gi|223996733|ref|XP_002288040.1|	proline dehydrogenase [Thalassiosira pseudonana CCMP1335]	34.46	2e-97	sp|O43272|PROD_HUMAN	Proline dehydrogenase 1, mitochondrial OS=Homo sapiens GN=PRODH PE=1 SV=3	100	0	tr|B8BVL5|B8BVL5_THAPS	Proline dehydrogenase (Fragment) OS=Thalassiosira pseudonana GN=THAPSDRAFT_32485 PE=3 SV=1	gi|407450852|ref|YP_006722576.1|	191	8e-54	COG0506	Proline dehydrogenase	E	Amino acid transport and metabolism	K00318|1|7e-120|364|csl:COCSUDRAFT_11422| proline dehydrogenase [EC:1.5.-.-]	GO:0006537//glutamate biosynthetic process;GO:0006562//proline catabolic process;GO:0055114//oxidation-reduction process	GO:0005509//calcium ion binding;GO:0004657//proline dehydrogenase activity	-
335	EJK56326.1	hypothetical protein THAOC_23816 [Thalassiosira oceanica]	118536	0.021	2	4	-	0.56	0.163	4	0.0266	EJK56326.1	MTGYETGHLATRLYEDSPHQREVEVGGRPHPFIPLSSDLPSVCLGKSLWSLVWIDPLCHWSREEAPLLSKQVRVDFTGRPRRKWEREMYERLKQMIEGGSPLTAEQSKVYERVKRQDERQKKRRRDDWAEYKRLKQMRVKRRDERQKKRRRDDWAEYNRLKQMVKGGTPLTAEQSKVYDSIKRQDERENKRRRDERAEYKRRFENITHRFMAGDIDAKCLTVCPNAPGAMRLNKLLKNGELYSITTPSGRLGIVPRKAYPRGARIGKICKDSALIGSVGAGDRIVAIDNQDVSNLSMAQVIKILVDKSGQERHLVLKRRVLLTDVLDHMARHELAVELKARNLHVSGDKFMMKERIWNSVAHYGGCLLGRDFDNNGGNKPPPIDTAAAHLSHKCGRGRA…	100	0	gi|397594775|gb|EJK56326.1|	hypothetical protein THAOC_23816 [Thalassiosira oceanica]	43.73	4e-157	sp|Q940S0|TMN2_ARATH	Transmembrane 9 superfamily member 2 OS=Arabidopsis thaliana GN=TMN2 PE=2 SV=1	100	0	tr|K0S5Z2|K0S5Z2_THAOC	Uncharacterized protein OS=Thalassiosira oceanica GN=THAOC_23816 PE=4 SV=1	-	-	-	-	-	-	-	K17085|1|2e-160|489|ppp:PHYPADRAFT_216379| transmembrane 9 superfamily member 1!K17087|2|5e-159|486|olu:OSTLU_29586| transmembrane 9 superfamily member 3			GO:0016020//membrane
336	XP_002289225.1	glutamate dehydrogenase [Thalassiosira pseudonana CCMP1335]	16563.7	0.022	2	15	-	0.64	0.018	4	3.212e-05	XP_002289225.1	STATEFNARYAFVAKIYNDVKNQSLMGKVANAMLTHGAVCLILGSGKLVNAETVAKVAWMDDLGVVRGDLFAGGSMVGFLRSTTSGVPFMTKEMGYMFGQFKSGLEASNLLIAEAHRDSYVPGHAVVLFAKYVGPDLDHPTMGMGVAERKDSYVPGHAVVLFAK	100	0	gi|223996393|ref|XP_002289225.1|	glutamate dehydrogenase [Thalassiosira pseudonana CCMP1335]	-		-		100	0	-	-	-	854	3e-76		Amino acid transport and metabolism ;	-	Amino acid transport and metabolism	K06443|1|2e-75|249|obr:102712228| lycopene beta-cyclase [EC:5.5.1.19]
337	XP_002289996.1	aliphatic amidase [Thalassiosira pseudonana CCMP1335]	56330.3	0.069	3	2	-	0.49	0.058	4	0.006357	XP_002289996.1	TWVTNPKDQQVQVSKANDQSQNQLFKLHTEEEVMANAKGIAECPFEWYKGAELIIRPQGYMYPAKEAGVWGVFSLTGEQHEQHPKMGLPGMDLIVFPEYSTMGIMYDR	100	0	gi|397624083|gb|XP_002289996.1|	aliphatic amidase [Thalassiosira pseudonana CCMP1335]	45.15	0	-	Predicted amidohydrolase	100	0	-	-	-	115	1e-15				General function prediction only ;	K13566|1|6e-13|70.5|pif:PITG_05539| omega-amidase [EC:3.5.1.3]		GO:0006807//nitrogen compound metabolic process	GO:0004040//amidase activity
338	EJK67264.1	hypothetical protein THAOC_11730 [Thalassiosira oceanica]	43303.2	0.027	1	3	EJK54127.1	0.8	0.064	4	0.01122	EJK67264.1	MTPSSIDGQGHGRSKSISEAVLVSQAVIDVTPPSLPNESRLGCADSVGTEPSVDLTAAHEALIGEGFRNPANVIKQPTLATLGETPFDSDGDDIEHHRVIATEIVKDPFQFESPEPVLQNAIVLLDPKIPDCNYLVTSARKRGLMVVGVVRGSNREGSASALYPTAEALLEVGMHQVYEPPVGAKFDVVECAANLKTIESQQNLRFLGVVPCREAAVDFSDILGALLGLAVVNDLGLASARRDKGLMKVAVANAGLRVARYARLTAGNGEDVASAVEELELEYPVVVKTPRGMSTLDVFICDNEEEAKVATSKIVSVQHGQTTATAAGSSSAGPPGELFRNEYAQSAVKCLTPVDSMPSQNAVASPVKSLPPRLRFSARIMWLRVSVDAGTGQTGIPLE…	100	0	gi|397624083|gb|EJK67264.1|	hypothetical protein THAOC_11730 [Thalassiosira oceanica]	-	-	-	-	100	0	tr|K0SQL1|K0SQL1_THAOC	Uncharacterized protein OS=Thalassiosira oceanica GN=THAOC_11730 PE=4 SV=1	-	-	-	-	-	-	-	-		GO:0005488//binding	-
339	EED90514.1	hypothetical protein THAPSDRAFT_36223, partial [Thalassiosira pseudonana CCMP1335]	28615.6	0.159	2	5	EED86117.1;XP_002292539.1;XP_002297595.1	0.78	0.103	4	0.02987	EED90514.1	MDKNFVAPVYPKSDEDVEFLLDALSDNFVFNTLDENELETLVNAFEGFECAEGEALISQGETGGHFYILRKGTVVFIVDGEEVGRAVPGNSFGELALLYNAPRAATCKAVDGKAGLWRVDQVTFRKLLAAHTIQNDNQTKDVLRKVPFLNDLDDEFINRISDALTTVYYDAGDVIFNRGSEGSVFYVIREGKVEYEHKKRGVKVLGPGDYFGEQAIVKNEPRKADATAVKDTIALALSREVFEKVLGPLSEVIARSND	100	1e-177	gi|224007158|ref|XP_002292539.1|	hypothetical protein THAPSDRAFT_36223 [Thalassiosira pseudonana CCMP1335]	39.75	4e-48	sp|Q6C2X0|KAPR_YARLI	cAMP-dependent protein kinase regulatory subunit OS=Yarrowia lipolytica (strain CLIB 122 / E 150) GN=PKAR PE=3 SV=1	100	3e-176	tr|B8C8N2|B8C8N2_THAPS	Putative uncharacterized protein (Fragment) OS=Thalassiosira pseudonana GN=THAPSDRAFT_36223 PE=4 SV=1	gi|291615255|ref|YP_003525412.1|	78.6	2e-15	COG0664	cAMP-binding domain of CRP or a regulatory subunit of cAMP-dependent protein kinases	T	Signal transduction mechanisms	K04739|1|7e-38|137|ppp:PHYPADRAFT_114967| cAMP-dependent protein kinase regulator	GO:0001932//regulation of protein phosphorylation	GO:0016740//transferase activity;GO:0008603//cAMP-dependent protein kinase regulator activity	GO:0005952//cAMP-dependent protein kinase complex
340	EED89471.1	26S proteasome ATPase regulatory subunit [Thalassiosira pseudonana CCMP1335]	42580.9	0.291	1	3	XP_002293010.1	0.8	0.046	4	0.004264	EED89471.1	MKSLERQLEFVSLQEEYLKDEMRHLQRELLRAKEEIRRIQSVPLVIGQFNEMIDANYGIVSSTAGSNYYVRILSTLDREALKPNTSIALHRHSHSVVDILPPESDSTVQLMSEKPDVTYKDIGGMDVQKQEVREAIELPLIQHHLYTQIGIDPPRGVLLYGPPGTGKTMMAKAVANATSATFISMVGSEFVQKYLGEGPRMVRDVFRLARENSPCVIFIDEIDAIATKRFDAQTGADREVQRILLELLNQMDGFDQTTNVKVIMATNRADTLDPALLRPGRLDRKIEFPQPDRRQKRMVFQAATSKMNLSDELDLEDYVNRSEKVSCADVASICAEAGLQAVRENRYVVLPKDFDKAYKRAVSNREKELLFYSI	100	0	gi|224008102|ref|XP_002293010.1|	26S proteasome ATPase regulatory subunit [Thalassiosira pseudonana CCMP1335]	75.94	0	sp|Q9SEI4|PRS6B_ARATH	26S proteasome regulatory subunit 6B homolog OS=Arabidopsis thaliana GN=RPT3 PE=1 SV=1	100	0	tr|B8CAA1|B8CAA1_THAPS	26S proteasome ATPase regulatory subunit OS=Thalassiosira pseudonana GN=RPT3 PE=3 SV=1	gi|20094314|ref|NP_614161.1|	359	2e-120	COG1222	ATP-dependent 26S proteasome regulatory subunit	O	Posttranslational modification, protein turnover, chaperones	K03063|1|0.0|613|egr:104434145| 26S proteasome regulatory subunit T3	GO:0030163//protein catabolic process;GO:0006508//proteolysis	GO:0008233//peptidase activity;GO:0005524//ATP binding;GO:0017111//nucleoside-triphosphatase activity	GO:0005737//cytoplasm;GO:0000502//proteasome complex
341	EJK50186.1	hypothetical protein THAOC_30872 [Thalassiosira oceanica]	18263.7	0.056	1	3	XP_002292918.1;EED90114.1	0.47	0.096	4	0.00467	EJK50186.1	MKLAVIAATAASAAAFVPSQNARMVTRIGAEFVYGDYDDKLWDNDAKKDVYNKWDPSAPRTGKNFNPFETFKGNSPDASGVFPGENFYKDPMRGDVSFQAMMDEKAEAEEREKNPKAGSEPGCPGCKNVSQKNERFLCQTCINELMHYHLPRAFAVNLVWTP	100	3e-100	gi|397576314|gb|EJK50186.1|	hypothetical protein THAOC_30872 [Thalassiosira oceanica]	-	-	-	-	100	7e-99	tr|K0RMU9|K0RMU9_THAOC	Uncharacterized protein OS=Thalassiosira oceanica GN=THAOC_30872 PE=4 SV=1	-	-	-	-	-	-	-	-	-	-	-
342	EED96622.1	carboxyl-terminal protease, partial [Thalassiosira pseudonana CCMP1335]	42582.7	0.025	1	1	XP_002286981.1;EJK63349.1	0.7	0.112	4	0.01963	EED96622.1	MTPSSNSAYDEAWTLVKKYALDQKFHGQNWDEAYEQYSSGVDLSSSDEDRIMKATTNLVGSLGDKYSRILDKDAYTRIQKFDLIGVGATLMPDAVTKDIIVGAPPVAGSAADQAGLKVKDVVVAVNGVETAGRTAFDIIDQISEDPNAGQVTFTIKSQGEDTSRDVTMKREFLEVRDPISYRVTETRADGTKVGYVRIAEFNSIVKPKLEAALRDLESQNVNAYVLDVRGNPGGAFQSAVEIAGLFMDNKLATDVVDGNGVDLKFRTSKDRVVIDPTDTLVIWVDGRSASASEVLSGALRDNCRAIVMGDTSFGKGLVQAVYGLKNGYGLVLTVAKYLTPGGTDINKVGIIPDVSKEEALPSAPGYVPLIGSDTSRVDFQDVMKRLDPSMCPRI	100	0	gi|223994595|ref|XP_002286981.1|	carboxyl-terminal protease [Thalassiosira pseudonana CCMP1335]	32.96	5e-53	sp|Q55669|CTPA_SYNY3	Carboxyl-terminal-processing protease OS=Synechocystis sp. (strain PCC 6803 / Kazusa) GN=ctpA PE=3 SV=1	100	0	tr|B8BRY2|B8BRY2_THAPS	Carboxyl-terminal protease (Fragment) OS=Thalassiosira pseudonana GN=THAPSDRAFT_261102 PE=4 SV=1	gi|307152185|ref|YP_003887569.1|	219	1e-65	COG0793	C-terminal processing protease CtpA/Prc, contains a PDZ domain	O	Posttranslational modification, protein turnover, chaperones	K03797|1|2e-66|222|gsl:Gasu_23610| carboxyl-terminal processing protease [EC:3.4.21.102]	GO:0006508//proteolysis	GO:0008236//serine-type peptidase activity	-
343	EED95817.1	6-phosphofructokinase, partial [Thalassiosira pseudonana CCMP1335]	43242.1	0.053	2	3	XP_002286176.1	0.83	0.047	4	0.007356	EED95817.1	YVRAGPVEKLHFNPKNVNAAIVTCGGLCPGLNNVIREVTRALFHLYGIEGKVYGIVGGYKGFYDPKTPPINLTVESVENIHHEGGTILGSSRGGFDMDKILEFIRSKKIRQLYVIGGDGTHRGAFKIHETCMEKGLHVAVAGIPKTIDNDVDYLDRSFGFITSVEAAQTAIRAAKVEASCNLPNGVGIVKLMGRSSGFIAAHATLGSGDVDLCLIPEVPIVLDGPNGCLPHLWRRVKKNGYAVIVVAEGAGEELLGESTETDASGNKKLPQIGEFMKKAVNDYFRKQGEEATVKYIDPSYMIRSVPANATDTLYCMQLGQNAVHGCFAGYTGFSVGLCNNKMCLLPIPELVATSPRQMNPMGRTWERILAVTRQPNTRKITRKSMARTKSSSDA	100	0	gi|223992985|ref|XP_002286176.1|	6-phosphofructokinase [Thalassiosira pseudonana CCMP1335]	51.05	1e-113	sp|Q9M076|PFKA6_ARATH	ATP-dependent 6-phosphofructokinase 6 OS=Arabidopsis thaliana GN=PFK6 PE=1 SV=1	100	0	tr|B8BQP1|B8BQP1_THAPS	6-phosphofructokinase (Fragment) OS=Thalassiosira pseudonana GN=PFK1 PE=4 SV=1	gi|302339733|ref|YP_003804939.1|	363	2e-121	COG0205	6-phosphofructokinase	G	Carbohydrate transport and metabolism	K00850|1|2e-126|378|cme:CYME_CMM196C| 6-phosphofructokinase 1 [EC:2.7.1.11]	GO:0016310//phosphorylation;GO:0006096//glycolytic process	GO:0003872//6-phosphofructokinase activity;GO:0047334//diphosphate-fructose-6-phosphate 1-phosphotransferase activity;GO:0005524//ATP binding	GO:0005945//6-phosphofructokinase complex
344	AIR75624.1	chaperonin GroEL (chloroplast) [Cyclotella sp. WC03_2]	57515.9	0.207	4	10	AIR75483.1	0.75	0.109	4	0.02866	AIR75624.1	MPKKILYQDNARRALERGMDIMVEAVSVTLGPKGRNVVLEKAYGSPQIVNDGVTIAKEINLEDHIENTGVSLIRQAAAKTNDVAGDGTTTATVLAYAMVKEGLKNVAAGANPISLKLGMEKATQYLVMQINEFAQPVEEIQSIKQVASISAGNDDIIGTLIANALSKVGKEGVISLEEGKGISTELEITEGMKLEKGFISPYFITDTEKMEVSYDNPYILLTDKRITLVQQDLLPILEQITKTKRPLLIIAEDVEKEALATLILNKLRGIVNVVAVRAPGFGELRKLMLQDIAVLTGGTVITQDAGLSLDNIQLNLLGQARRIIVNKDTTTIVGDGLEIENIKTRCEQLRKQVNIADTSYEKEKLQDRIAKLSGGIAVIRVGAVTETEMKDKKLRLEDA…	100	0	gi|691190111|gb|AIR75624.1|	chaperonin GroEL (chloroplast) [Cyclotella sp. WC03_2]	94.92	0	sp|A0T0X0|CH60_THAPS	60 kDa chaperonin, chloroplastic OS=Thalassiosira pseudonana GN=groL PE=3 SV=1	100	0	tr|A0A089X7H0|A0A089X7H0_9STRA	60 kDa chaperonin, chloroplastic OS=Cyclotella sp. WC03_2 GN=groL PE=3 SV=1	gi|307150334|ref|YP_003885718.1|	775	0	COG0459	Chaperonin GroEL (HSP60 family)	O	Posttranslational modification, protein turnover, chaperones	K04077|1|0.0|542|gsl:Gasu_12790| chaperonin GroEL	GO:0042026//protein refolding	GO:0005524//ATP binding;GO:0051082//unfolded protein binding	GO:0009507//chloroplast
345	EJK75924.1	hypothetical protein THAOC_02338 [Thalassiosira oceanica]	42609.5	0.021	1	1	-	0.77	0.077	4	0.01385	EJK75924.1	MLFVDKHRPSRLSQLNYHDTLTQRLTSLAADPGGLPHLLLYGPSGAGKKTRVMALLREVFGCGAERLRLEKRTFTTPTKRQVEINMIQSNYHIEMAPGDAGLNDRYVIQDVIKEMAANKNIASVVTSKDGNDGEDDGHAKKKAAKASYKVVVLVEVDKLTRQAQAALRRTMEKYSSSCRLILCCNNPSKVIDPVRSRCLGIRVAAPSDDEIASVLKTVSRKENIKLADELAINIARLSSRNLRRALLMLESCYVTTRDESPRELKADTPVPRTDWERYIAMLATGIVKEQSPKSLMAAREKLYELLINCIPAQIILKTLLMELLPVLDDTIKAEVVHWAAFYEHRIALGSKEIFHLEAFIAKFMALYKKYLNDLFG	100	0	gi|397643532|gb|EJK75924.1|	hypothetical protein THAOC_02338 [Thalassiosira oceanica]	52.42	2e-112	sp|Q2TBV1|RFC3_BOVIN	Replication factor C subunit 3 OS=Bos taurus GN=RFC3 PE=2 SV=1	100	0	tr|K0TFT7|K0TFT7_THAOC	Uncharacterized protein OS=Thalassiosira oceanica GN=THAOC_02338 PE=4 SV=1	gi|307596342|ref|YP_003902659.1|	134	2e-34	COG0470	DNA polymerase III, delta prime subunit	L	Replication, recombination and repair	K10756|1|2e-112|335|smo:SELMODRAFT_234901| replication factor C subunit 3/5	GO:0006260//DNA replication	GO:0003677//DNA binding	-
346	ACI64103.1	aldo-keto oxidoreductase [Thalassiosira pseudonana CCMP1335]	38463.3	0.023	1	1	XP_002295386.1	0.6	0.093	4	0.007082	ACI64103.1	MSSYAKPSNFDLSSPSACPTYKLNSGHSMPVIAYGTFRCNPGEVSPCVINALKAGYRHFDLAHVYGNEKEIGKALKQAFDEGMVTREELFITGKLWNTDHEVNIVPKACAHSLNNLQLNYFDLYLIHFPVAWKHTGLDSPGWGASEFGDTPLIDTWRAMEGLVESGLCKSIGVSNYPLLLMHDLTTQAMIKPACNQIEVHAYYQRESLVNYCLSRNISVSAHTPLGGGAANAHQWNAVSPLQDPVVVGIAEAHGKSAGQVLLRYSLQRGIAVLPKSVKPRRMAENIDVFGFKLTEEEMKSLKALDKYVSYKTNPNPNVLQSFRNGNPLMISTCINLLWIAIQHI	100	0	gi|224011223|ref|XP_002295386.1|	aldo-keto oxidoreductase [Thalassiosira pseudonana CCMP1335]	44.88	6e-91	sp|P28475|S6PD_MALDO	NADP-dependent D-sorbitol-6-phosphate dehydrogenase OS=Malus domestica GN=S6PDH PE=2 SV=1	100	0	tr|B5YLL9|B5YLL9_THAPS	Aldo-keto oxidoreductase OS=Thalassiosira pseudonana GN=THAPS_264496 PE=4 SV=1	gi|451948572|ref|YP_007469167.1|	241	3e-76	COG0656	Aldo/keto reductase, related to diketogulonate reductase	Q	Secondary metabolites biosynthesis, transport and catabolism	K00011|1|8e-100|300|cmo:103490340| aldehyde reductase [EC:1.1.1.21]	GO:0046686//response to cadmium ion;GO:0055114//oxidation-reduction process	GO:0047641//aldose-6-phosphate reductase (NADPH) activity	GO:0005829//cytosol
347	EJK63072.1	hypothetical protein THAOC_16289 [Thalassiosira oceanica]	106052	0.043	1	3	-	0.73	0.035	4	0.0009554	EJK63072.1	MAPKDEETPVDITVDTATTKKNDKDAKKSKQSNDDIVEDDNALSEEDKELKERLETCVSTLINENNEASVTVPIRLQALDVMVTELRSATSSMTSVPKPLKFLRPKFDLLKKYYGSIEGDNSDKELLFLRARLADVLSVLAMTLGKHGEYLPLYLLDPSVVQVLSAGISHRLIAEDRESLNFKLKGTKDFGALKQLGDTRASDDNLGSWGHEFVRSLAGEIGQEYNSRVIDGADPEKDEPFADLLGMVDVIVPFNVSHNAEAEAVDLLIEVQRLAKILDLDSIDENNYKRVCLYLIKTADYMSDPDDYAEVLDSAYQLFVKQEQYFDALRVALRIGNDDAIPDLLAKSADDKLMKKQMCLLLGRQRINYEVEDDEEEDELNELIGNEKLSEEFLKVAQD…	100	0	gi|397614873|gb|EJK63072.1|	hypothetical protein THAOC_16289 [Thalassiosira oceanica]	47.08	0	sp|Q9SIV2|PSD2A_ARATH	26S proteasome non-ATPase regulatory subunit 2 homolog A OS=Arabidopsis thaliana GN=RPN1A PE=1 SV=2	100	0	tr|K0SXU4|K0SXU4_THAOC	Uncharacterized protein OS=Thalassiosira oceanica GN=THAOC_16289 PE=4 SV=1	-	-	-	-	-	-	-	K03028|1|0.0|833|ppp:PHYPADRAFT_154274| 26S proteasome regulatory subunit N1	GO:0042176//regulation of protein catabolic process;GO:0050790//regulation of catalytic activity	GO:0030234//enzyme regulator activity	GO:0000502//proteasome complex
348	AIR76108.1	ribosomal protein L1 (chloroplast) [Thalassiosira weissflogii]	25287.2	0.117	2	6	YP_009093435.1	0.49	0.043	4	0.0004865	AIR76108.1	MRKLSRRQNENLKKTKNVVHSSLEEAINLLQETATAKFIESVELHANLNIDPKYADQQLRTTVTLPHGVGKSVRIAVLTNEANFNEATEAGADIVGSQDLIDDISQGNINFDLLIATPDMMPKLAKLGRVLGPKGLMPSPKSGTVSTTLTETLSDFKKGKFEYKADKTGIVHVSFGKANFSKSQLMENLSSLYKSIEQNRPSGVKGKYFKSLFICSSMGPSIQLDLNVFD	100	6e-170	gi|700082637|ref|YP_009093435.1|	ribosomal protein L1 (chloroplast) [Thalassiosira weissflogii]	91.74	6e-159	sp|A0T0Q6|RK1_THAPS	50S ribosomal protein L1, chloroplastic OS=Thalassiosira pseudonana GN=rpl1 PE=3 SV=1	100	1e-168	tr|A0A089VQC3|A0A089VQC3_THAWE	50S ribosomal protein L1, chloroplastic OS=Thalassiosira weissflogii GN=rpl1 PE=3 SV=1	gi|428768608|ref|YP_007160398.1|	293	9e-100	COG0081	Ribosomal protein L1	J	Translation, ribosomal structure and biogenesis	K02863|1|3e-90|273|nnu:104606334| large subunit ribosomal protein L1	GO:0006412//translation	GO:0003735//structural constituent of ribosome;GO:0019843//rRNA binding	GO:0015934//large ribosomal subunit;GO:0009507//chloroplast
349	XP_002289363.1	vesicle-transport protein Bet3 [Thalassiosira pseudonana CCMP1335]	22406.1	0.045	1	1	EED92900.1;EJK73306.1	0.79	0.045	4	0.003447	XP_002289363.1	MSTKKSAAQAGQSLWSAMPKANSELFALTYGSLVTELVRDYEDPIEVNAQLDRIGHSIGVRCVDEFLSKADVAGMSLATQCQNLRDTAEVVAKMGFKMFLGIQAEVGGFSQDQRSFSIYLQDNPLATFVELPGDEQSGGDDLRRLKYSNLYCGVIRGALEQVNLKVECNIVRDTLKGDEVNEIRVELKEVLADGAGDDYKEE	100	2e-148	gi|223999381|ref|XP_002289363.1|	vesicle-transport protein Bet3 [Thalassiosira pseudonana CCMP1335]	45.5	3e-56	sp|Q86K94|TPPC3_DICDI	Trafficking protein particle complex subunit 3 OS=Dictyostelium discoideum GN=trappc3 PE=3 SV=2	100	6e-147	tr|B8BZL3|B8BZL3_THAPS	Trafficking protein particle complex subunit OS=Thalassiosira pseudonana GN=THAPSDRAFT_22307 PE=3 SV=1	-	-	-	-	-	-	-	K20302|1|5e-60|189|ccp:CHC_T00008483001| trafficking protein particle complex subunit 3	-	-	-
350	AAC02908.1	ribulose-1,5-bisphosphate carboxylase/oxygenase large subunit, partial (chloroplast) [Skeletonema costatum]	53096.4	0.288	1	1	-	0.72	0.154	4	0.04716	AAC02908.1	RYESGVIPYAKMGYWDASYTVKDTDVLALFRITPQPGVDPVEAAAAVAGESSTATWTVVWTDLLTACERYRAKAYRVDPVPNSADVFFAFIAYECDLFEEASLANLTASIIGKVFGFKAVSALRLEDMRXXXXXXXXXXXXXXXXXXXXXXXXXXXXXXXXXXXXXKLGLSGKNYGRVVYEGLKGGLDFLKDDENINSQPFMRWRERFLNCMEGINRASAATGEVKGSYLNITAATMEEVYKRAEYAKAVGSIVVMIDLVMGYTAIQSIAYWARENDMLLHLHRAGNSTYARQKNHGINFRVICKWMRMSGVDHIHAGTVVGKLEGDPLMIKGFYDILRLTELEVNLPFGIFFEMDWASLRRCMPVASGGIHCGQMHQLIHYLGDDVVLQFGGGTIGHP…	100	0	gi|2895138|gb|AAC02908.1|	ribulose-1,5-bisphosphate carboxylase/oxygenase large subunit [Skeletonema costatum]	88.03	0	sp|A0T0N6|RBL_THAPS	Ribulose bisphosphate carboxylase large chain OS=Thalassiosira pseudonana GN=rbcL PE=3 SV=1	100	0	tr|O46963|O46963_SKECO	Ribulose bisphosphate carboxylase large chain (Fragment) OS=Skeletonema costatum GN=rbcL PE=3 SV=1	gi|292493417|ref|YP_003528856.1|	692	0	COG1850	Ribulose 1,5-bisphosphate carboxylase, large subunit, or a RuBisCO-like protein	G	Carbohydrate transport and metabolism	K01601|1|0.0|739|cme:CymeCp013| ribulose-bisphosphate carboxylase large chain [EC:4.1.1.39]	GO:0019253//reductive pentose-phosphate cycle;GO:0009853//photorespiration;GO:0055114//oxidation-reduction process	GO:0016984//ribulose-bisphosphate carboxylase activity;GO:0004497//monooxygenase activity;GO:0000287//magnesium ion binding	GO:0009507//chloroplast
351	EED92232.1	predicted protein, partial [Thalassiosira pseudonana CCMP1335]	102235	0.055	1	2	XP_002290036.1;XP_002290480.1;EED91788.1	0.38	0.124	4	0.008782	EED92232.1	MNENSPWHTMSIDGTIKQMGLKEDLPKAGLSTDEAASRLTKYGPNQMTEKVKTTLLQRIWHQINNVLVYVLITVAVVSLIQAVTTNNSNTRFTAWFQVALIVSVITLNTWIGIYQEGNAEKAADALKNMLSTDARVIRGGKEVMIPAGDIVPGDVCLLGLGDKIPADLRLISVSNLATGEAALTGESVPIDKVRMSVANPDQVPLGDRKNMAYSATLVAQGSGIGIAISTGDFTQIGTINRLVNNTETIKTDVLKQIDMVSKYLFIAICTMCLATFFVAFFYSDNYKKDALGSINIALTCAVAMVPEGLEAIVTLTYSYAVKVMASQNAIVRALPAVETLGSVTVICSDKTGTLTQNIMSLTAFVTSNARYKNNNPEGVKPAHPDDNFPVSNGESPTKD…	100	0	gi|224000728|ref|XP_002290036.1|	cation transporting ATPase [Thalassiosira pseudonana CCMP1335]	37.5	4e-164	sp|P9WPS9|CTPF_MYCTU	Probable cation-transporting ATPase F OS=Mycobacterium tuberculosis (strain ATCC 25618 / H37Rv) GN=ctpF PE=1 SV=1	100	0	tr|B8C1L0|B8C1L0_THAPS	Cation transporting ATPase (Fragment) OS=Thalassiosira pseudonana GN=THAPSDRAFT_34487 PE=3 SV=1	gi|317051434|ref|YP_004112550.1|	623	0	COG0474	Magnesium-transporting ATPase (P-type)	P	Inorganic ion transport and metabolism	K01537|1|3e-104|352|cam:101512366| Ca2+-transporting ATPase [EC:3.6.3.8]	GO:0008152//metabolic process;GO:0006812//cation transport	GO:0046872//metal ion binding;GO:0005524//ATP binding;GO:0008900//hydrogen:potassium-exchanging ATPase activity	GO:0016021//integral component of membrane
352	EJK63338.1	hypothetical protein THAOC_16004, partial [Thalassiosira oceanica]	68502.6	0.019	1	1	-	0.54	0.092	4	0.005136	EJK63338.1	FAVRTARPAVRLRSGPHDLRSGPQQDSNPSSFSRSDQQGWLCDFVRTEALATRDRANYLIRPPTLSQLTYLVPPHGRIEYPQDKIEAGQKIKPKDSTSKISEPRALFDMDMLSIALVALTSIAGGIFLTWKLLLLLAPGWYSKMIGGNHVSVDDFVGGPPSAKSALKSVLMNWLSVGSRVAKREGYDLKTEDSDKVPGLKVTSRDEKGTKSNGGAGKPPPVIVGTIRMGFGHHRIAYAATSWGLGGDVASKDRDIWFHDFLNIESEEAQMIKDTDKLYSKGSRLASELGGTAEKIWGSITKSGDEDSLRVTYQTSEHLVPLIAGLDRDSPIIASHSLVACAAVAAGFKNVINLVIDNHAQWFVVAPGALNLVQGPSNYHSLLQMGVPEKDLALAGHWIP…	100	0	gi|397615289|gb|EJK63338.1|	hypothetical protein THAOC_16004, partial [Thalassiosira oceanica]	-	-	-	-	100	0	tr|K0SB43|K0SB43_THAOC	Uncharacterized protein (Fragment) OS=Thalassiosira oceanica GN=THAOC_16004 PE=4 SV=1	-	-	-	-	-	-	-	-	-	-	-
353	EJK49760.1	hypothetical protein THAOC_31329 [Thalassiosira oceanica]	79758.2	0.015	1	1	-	0.66	0.089	4	0.008624	EJK49760.1	MLGRAAGHRSAAAASLLHRRRRRFAESPLAAVATGLRGASSTEGESASGIRVGGLGALALAGSSLLAGYLIGTSHQEHLTDLNKDRELPKGERGPTEHETVKLTEAQAQLAARLERIVGKGYVVDGKEGTSSNRKFLKGARLGQGTSLCIVQPGTLGQAIRALQEIVDAGCVVLPQGSNTGLTGGSVPRNDNGDSRPVVVMSLKRLQTHFPIDDGKRVVCLAGTGISTLASSIQEWFPDRESHSILGSTFLNPTTAAGVAFGSGGTLVRKGPARTDRALYCKVYKNKFGEHIVSVVNTLGIEGLEEENFQEGAGNGVDTLDSYCMDVKQGYRRPMMKSSHSKHGQAKASDTEYSRLVCECSKEVSRFNADTKGEDCNRSEGKVVILATVHDTFPVPSEK…	100	0	gi|397575557|gb|EJK49760.1|	hypothetical protein THAOC_31329 [Thalassiosira oceanica]	26.83	7e-58	sp|P45295|LDHD_HAEIN	D-lactate dehydrogenase OS=Haemophilus influenzae (strain ATCC 51907 / DSM 11121 / KW20 / Rd) GN=dld PE=3 SV=1	100	0	tr|K0R9I7|K0R9I7_THAOC	Uncharacterized protein OS=Thalassiosira oceanica GN=THAOC_31329 PE=4 SV=1	gi|383317180|ref|YP_005378022.1|	228	3e-64	COG0277	FAD/FMN-containing dehydrogenase	C	Energy production and conversion	-	GO:0008152//metabolic process;GO:0009987//cellular process	GO:0016616//oxidoreductase activity, acting on the CH-OH group of donors, NAD or NADP as acceptor	-
354	XP_002287160.1	26S proteasome ATPase regulatory subunit 6 [Thalassiosira pseudonana CCMP1335]	45188.3	0.191	1	2	EED94603.1	0.51	0.117	4	0.009013	XP_002287160.1	MATATSPSLTSSNNNGGTGMDKYYFSKISALSSTISTRTSDLQRLKARRNELNAKVRMLREELYHLQEPGSYVGEVIKQMGQKKVLVKINPEGKYVVDIDKDIDINDLKPNTRVALRNDSYTLHKILPTKVDPLVSLMKVEAVPDSTYDMIGGLEKQVMEIKEVIELPIKHPELFESLGVAQPKGVLLYGPPGTGKTLLARAVAHHTDCTFIRVSGAELVQKYIGEGSRMVRELFIMAREASPSIIFMDEIDSIGQSRGGGGGDSEVQRTMLELLNQLDGFEPAQNIKVIMATNRIDILDSALLRPGRIDRKIEFPNPNAENRMAIMKIHSSKMNLLRNIDLHTIAEKMMNASGAECKAVCTEAGMFALRERRVHVTQEDFEMAVSKVMKKEGESNMSL…	100	0	gi|223994953|ref|XP_002287160.1|	26S proteasome ATPase regulatory subunit 6 [Thalassiosira pseudonana CCMP1335]	78.01	0	sp|Q9C5U3|PRS8A_ARATH	26S proteasome regulatory subunit 8 homolog A OS=Arabidopsis thaliana GN=RPT6A PE=1 SV=1	100	0	tr|B8BTH7|B8BTH7_THAPS	26S proteasome ATPase regulatory subunit 6 OS=Thalassiosira pseudonana GN=RPT6 PE=3 SV=1	gi|18976487|ref|NP_577844.1|	363	5e-122	COG1222	ATP-dependent 26S proteasome regulatory subunit	O	Posttranslational modification, protein turnover, chaperones	K03066|1|0.0|621|nnu:104592341| 26S proteasome regulatory subunit T6	GO:0030163//protein catabolic process;GO:0006508//proteolysis	GO:0008233//peptidase activity;GO:0005524//ATP binding;GO:0017111//nucleoside-triphosphatase activity	GO:0005737//cytoplasm;GO:0000502//proteasome complex
355	EJK45790.1	hypothetical protein THAOC_35575 [Thalassiosira oceanica]	29165.1	0.323	2	4	-	0.64	0.173	4	0.03634	EJK45790.1	MMATRAKMSTKRKFVADGVFYAELNELLTRELAEDGYAGVEVRTTPHRTEIIIRATKTQNVLGEKGQRIRELTSVVQKRFDFAEGAVELYAERVQNRGLCAQAQAESLKFKLLAGLAVRRACYGVVRFVMEASAKGCEVIVSGKLRGQRAKAMKFGDGYMIKTGHAGQVYTDTAVRHVAMRQGMIGIKVSIMLPHDPKGQIGPKIPLDDVVTILEPKEEPSPEEILQQQQAAEAAAAAASAAALMAQQQEMLQQQAPVDPNVAAGY	100	2e-158	gi|397567805|gb|EJK45790.1|	hypothetical protein THAOC_35575 [Thalassiosira oceanica]	74.65	4e-115	sp|P47835|RS32_XENLA	40S ribosomal protein S3-B OS=Xenopus laevis GN=rps3-b PE=2 SV=1	100	6e-157	tr|K0R1I6|K0R1I6_THAOC	Uncharacterized protein OS=Thalassiosira oceanica GN=THAOC_35575 PE=4 SV=1	gi|57641471|ref|YP_183949.1|	128	9e-35	COG0092	Ribosomal protein S3	J	Translation, ribosomal structure and biogenesis	K02985|1|5e-121|348|sbi:SORBI_02g038990| small subunit ribosomal protein S3e	GO:0006412//translation;GO:0009651//response to salt stress	GO:0003735//structural constituent of ribosome;GO:0003723//RNA binding	GO:0005730//nucleolus;GO:0022626//cytosolic ribosome;GO:0005773//vacuole;GO:0005886//plasma membrane;GO:0015935//small ribosomal subunit;GO:0009507//chloroplast
356	XP_002291402.1	predicted protein [Thalassiosira pseudonana CCMP1335]	59797.3	0.023	1	1	EED91509.1	0.78	0.099	4	0.02842	XP_002291402.1	MAESTTRAYSSFTPSWQRFHEFAAPIASSSGAGSAAASSSSNQQHPYTRQYSHVYSARLAGLRERCLKNAREKLAGGELDGKVEVVDRIIEVKEGAWSILVGTIVKETDPKRRPPVTSTYTDADACSFLFPTDGSANAGVDGVQESLRAHLFDLDKGDILHLEDESGRVELSPETTDKDGMDVDNADALDPNKVATGVVVAVIGKVSAEKGVMHVHSVHFAGPPPAEKKSASGDELRGARVNDNETADPTLLLVSGLGCGSDSPSDVESGGSLALRREMLLEYLTNNMGNSEGNGSSVCRVIVAGGSIAPPVNASSDDETTKENKKSNCNSVAKSKNGKNDSSSALAFSLRELDLYLSEILSSGVPVDYIPGWHDPTNANWPQRPIHSCLLPNACSYVD…	100	0	gi|224003461|ref|XP_002291402.1|	predicted protein [Thalassiosira pseudonana CCMP1335]	30.29	1e-49	sp|O48520|DPOD2_ARATH	DNA polymerase delta small subunit OS=Arabidopsis thaliana GN=POLD2 PE=2 SV=2	100	0	tr|B8C5H6|B8C5H6_THAPS	Uncharacterized protein OS=Thalassiosira pseudonana GN=THAPSDRAFT_23058 PE=4 SV=1	-	-	-	-	-	-	-	K02328|1|7e-55|194|pvu:PHAVU_001G143200g| DNA polymerase delta subunit 2	GO:0016458//gene silencing;GO:0016569//covalent chromatin modification;GO:0043412//macromolecule modification;GO:0006260//DNA replication	GO:0003887//DNA-directed DNA polymerase activity;GO:0003677//DNA binding	-
357	EJK75267.1	hypothetical protein THAOC_03013 [Thalassiosira oceanica]	52009.8	0.069	1	2	-	0.64	0.139	4	0.02421	EJK75267.1	MPSDNKEQEDEERQIEIFKVKKLIKNLEAAKGNGTSMISLIIPPGTQISQISKMLADEYGTASNIKSRVNRLSVLGAITSTQQRLKLYNRCPKNGLVMYCGTVVTDEGKEKKVNIDFEPFKPINTSLYLCDNKFHTEDLNELLMDDEAFGFIVMDGNGSLYGTVQGSAREVLHKFSVDLPKKHGRGGQSALRFARLRLEKRHNYVRKVAEMATQLFVPNGQSPNIQGLVLAGSAEFKQQLMRSDLFDQRLSKIVIKMVDVSYGGEQGFNQAIEYSADTLGAVKLMKEKKLLQKYMDEISLDTGKYCFMVDDTLKALDLGAVEDLIVWENLEMTRYVLRNSSTSEEHIVHLTPEQEKNESFFQDKESGVELEVVEKESMVEWLANHYKDYGCKLEFVTDK…	100	0	gi|397642488|gb|EJK75267.1|	hypothetical protein THAOC_03013 [Thalassiosira oceanica]	72.93	0	sp|Q9GR88|ERF1_POLMI	Eukaryotic peptide chain release factor subunit 1 OS=Polyandrocarpa misakiensis GN=ERF1 PE=2 SV=1	100	0	tr|K0TQ17|K0TQ17_THAOC	Uncharacterized protein OS=Thalassiosira oceanica GN=THAOC_03013 PE=4 SV=1	gi|18977965|ref|NP_579322.1|	247	1e-75	COG1503	Peptide chain release factor 1 (eRF1)	J	Translation, ribosomal structure and biogenesis	K03265|1|0.0|617|csl:COCSUDRAFT_54984| peptide chain release factor subunit 1	GO:0006415//translational termination	GO:0016149//translation release factor activity, codon specific	GO:0005737//cytoplasm
358	YP_009093452.1	putative plastid division protein (chloroplast) [Thalassiosira weissflogii]	69952.5	0.316	4	28	AIR76125.1;XP_002297509.1;ABK20758.1;YP_874535.1;EED86149.1	0.73	0.084	4	0.0115	YP_009093452.1	MGQQILRALLIGLILISIIDLSVKTFGIESPESPDTIRNQTQLNQNVVSSRMTYGRFLEYLEMGWVKQVDLYDNSRNAIVQASSPELGNRPQTIRVEIPVGASQLIQKLKEYNIDFDAHPAEQKNLFVTVASNLLLPLVFIAGLVYFFQNSESFGGGSGQSPLSLGKSTARFERRPDTGVNFNDIAGIDEAKAEFEEIVSFLKEPEKYTVVGAKIPKGILLVGPPGTGKTLLAKAIANEADVPFFSVAGSEFVEMFIGIGAARVRDLFQKASENAPCIVFIDEIDAVGRERGAGVGGGNDEREQTLNQLLTEMDGFKENKGVIVVGATNRVDILDAALLRPGRFDRQVTVNLPDRLGRISILKVHAKNKPLGEDVSLVQLANRTPGFSGADLANLLNEA…	100	0	gi|700082654|ref|YP_009093452.1|	putative plastid division protein (chloroplast) [Thalassiosira weissflogii]	86.45	0	sp|P49825|FTSH_ODOSI	ATP-dependent zinc metalloprotease FtsH OS=Odontella sinensis GN=ftsH PE=3 SV=1	100	0	tr|A0A089VP72|A0A089VP72_THAWE	ATP-dependent zinc metalloprotease FtsH OS=Thalassiosira weissflogii GN=ftsH PE=3 SV=1	gi|113477982|ref|YP_724043.1|	765	0	COG0465	ATP-dependent Zn proteases	O	Posttranslational modification, protein turnover, chaperones	K03798|1|0.0|640|csl:COCSUDRAFT_22213| cell division protease FtsH [EC:3.4.24.-]	GO:0006200//ATP catabolic process;GO:0051301//cell division;GO:0006508//proteolysis;GO:0030163//protein catabolic process	GO:0008270//zinc ion binding;GO:0004222//metalloendopeptidase activity;GO:0005524//ATP binding;GO:0016887//ATPase activity	GO:0016021//integral component of membrane;GO:0009535//chloroplast thylakoid membrane
[truncated: 417 more rows]

## Sheet: Up-regulation
Title :	Comparative proteomic analysis reveals new insights into the common and specific metabolic regulation of diatom Skeletonema dohrnii to the silicate and temperature availability
Authors :	Satheeswaran Thangaraj, Mario Giordano and Jun Sun*
Table S1	Upregulated proteins observed in lower silicate cells
[truncated: 611 more rows]
