# Supplementary material for: Comparative Proteomic Analysis Reveals New Insights Into the Common and Specific Metabolic Regulation of the Diatom Skeletonema dohrnii to the Silicate and Temperature Availability
Source: Front Plant Sci. 2020 Nov 5;11:578915. doi: 10.3389/fpls.2020.578915 (PMC7674209; doi:10.3389/fpls.2020.578915)
Supplement: Supplementary Table 3 — DEP associated with photosynthesis, carbon and ribosome metabolism in both silicate and temperature limited conditions. [file Table_3.XLSX]

## Sheet: Photosynthesis
Title :	Comparative proteomic analysis reveals new insights into the common and specific metabolic regulation of diatom Skeletonema dohrnii to the silicate and temperature availability
Authors :	Satheeswaran Thangaraj, Mario Giordano and Jun Sun*
Table S3	Regualtion of photosynthesis proteins in lower silicate cells
Gene	Complex	Protein_ID	Description	Mass	Protein_Coverage	Uniq_Pep_Num	Uniq_Spec_Num	Sameset	Ratio_Control-VS-Low temperature	Quant_Num_Control-VS-Low temperature	Qvalue_Control-VS-Low temperature	Fold change	Protein_ID	Protein_Seqence	NCBInr Identity	NCBInr E-value	NCBInr Accession	NCBInr Description	Swissprot Identity	Swissprot E-value	Swissprot Accession	Swissprot Description	Tremble Identity	Tremble E-value	Tremble Accession	Tremble Description	Protein_or_Domain	COG Score	COG E-value	COG ID	COG Function-Description	COG Code	COG Function-Categories	KEGG(ko_id|rank|evalue|score|identity|ko_definition)	GO Biological_Process	GO Molecular_Function	GO Cellular_Component
PsbA	PSII	AFO84283.1	photosystem II protein D1, [Stephanodiscus hantzschii]	35595.7	0.062	2	15	AFO84278.1;AIR76210.1;ADB27608.1;YP_874574.1;YP_004072655.1;sp|A0T0W2.1|PSBA_THAPS;YP_874620.1;AIR75891.1;AIR75521.1;YP_004072608.1;YP_009093264.1;AIR75475.1;ABK20843.1;ABK20797.1;AIR75937.1;ADB27561.1;AIR75616.1;AIR76164.1;YP_009093218.1;YP_009093491.1;AIR75662.1;YP_009093537.1	0.349	15	0.002	-2.1	AFO84283.1	RREGVSLWERFCAWITSTENRLYIGWFGCLMFPTLLTATSCFIIAFIAAPPVDIDGIREPVAGSLLYGNNIISGAVIPSSNAIGMHFYPIWEAASVDEWLYNGGPYQLIVLHFLLGVASYMGREWELSYRLGMRPWIFVAFSAPVAAASAVFLVYPIGQGSFSDGMPLGISGTFNFMLVFQAEHNILMHPFHMAGVAGVFGGSLFSAMHGSLVTSSLIRETTENESTNYGYKFGQEEETYNIVAAHGYFGRLIFQYASFNNSRALHFFLALWPVLGIWLTAMGISTMAFNLNGFNFNQSVVDSQGRVINTWADIINRADL	100	0	gi|691189961|gb|AIR75475.1|	photosystem II protein D1 (chloroplast) [Cyclotella sp. L04_2]	100	0	sp|A0T0W2|PSBA_THAPS	Photosystem II protein D1 OS=Thalassiosira pseudonana GN=psbA PE=3 SV=1	100	0	tr|A0A089VGZ2|A0A089VGZ2_9STRA	Photosystem II protein D1 OS=Cyclotella sp. L04_2 GN=psbA PE=3 SV=1	-	-	-	-	-	-	-	K02703|1|0.0|575|mtr:MTR_0002s0380|	GO:0009772//photosynthetic electron transport in photosystem II;GO:0009635//response to herbicide	GO:0016491//oxidoreductase activity;GO:0045156//electron transporter, transferring electrons within the cyclic electron transport pathway of photosynthesis activity;GO:0005506//iron ion binding	GO:0030076//light-harvesting complex;GO:0009523//photosystem II;GO:0016021//integral component of membrane;GO:0009535//chloroplast thylakoid membrane
PsbD		sp|A0T0T0.1|PSBD_THAPS	RecName: Full=Photosystem II D2 protein; Short=PSII D2 protein; AltName: Full=Photosystem Q(A) protein	39248.7	0.168	2	14	AIR75584.1;YP_009093186.1;AIR75443.1;ADB27516.1;EJK55847.1;EJK54216.1;ABK20765.1;EJK52340.1;YP_874542.1;YP_004072562.1;AIR75859.1	0.369	14	0.004	-2.3	sp|A0T0T0.1|PSBD_THAPS	MTIAIGQNQERGLFDLVDDWLKRDRFVFVGWSGILLFPTAYLAAGGWFTGTTFVTSWYTHGLASSYLEGCNFLTAAVSTPANSMGHSLLLLWGPEAQGDFTRWCQIGGLWAFIALHGAFGLIGFCLRQFEIARLVGIRPYNAIAFSGPIAVFVSVFLLYPLGQASWFFAPSFGVAAIFRFLLFLQGFHNWTLNPFHMMGVAGILGGALLCAIHGATVENTLFEDGDAANTFRAFTPTQSEETYSMVTANRFWSQIFGVAFSNKRWLHFFMLFVPVAGLWTSSIGIVGLALNLRAYDFVSQELRAAEDPEFETFYTKNILLNEGIRSWMAAQDQPHENFVFPEEVLPRGNAL	100	0	gi|118411148|ref|YP_874542.1|	photosystem II reaction center protein D2 [Thalassiosira pseudonana]	100	0	sp|A0T0T0|PSBD_THAPS	Photosystem II D2 protein OS=Thalassiosira pseudonana GN=psbD PE=3 SV=1	99.15	0	tr|A0A089VN83|A0A089VN83_9STRA	Photosystem II D2 protein OS=Cyclotella sp. L04_2 GN=psbD PE=3 SV=1	-	-	-	-	-	-	-	K02706|1|0.0|684|ccp:CHC_205|	GO:0009772//photosynthetic electron transport in photosystem II	GO:0016491//oxidoreductase activity;GO:0045156//electron transporter, transferring electrons within the cyclic electron transport pathway of photosynthesis activity;GO:0005506//iron ion binding	GO:0030076//light-harvesting complex;GO:0009523//photosystem II;GO:0016021//integral component of membrane;GO:0009535//chloroplast thylakoid membrane
PsbC		AIR75860.1	photosystem II CP43 chlorophyll apoprotein (chloroplast) [Roundia cardiophora]	52050.2	0.202	7	31	YP_004072563.1;AIR76133.1;YP_009093460.1;AIR75444.1;YP_009093187.1;AIR75585.1;ADB27517.1	0.352	30	0.002	-2.9	AIR75860.1	MKISYSLRRYYHVETPFNSSIAGRDIESTGFAWWSGNARLINVSGKLLGAHVAHAGLMVFWAGAMVLFEVSHFVPEKPLYEQGFICIQHLATLGYGIGPGGEITSTVPYFAVGVIHLISSAVLGFGGIYHSLLGPDTLEESFPFFGYDWRDKNKMTTILGIHLCLLGLGSLLLVAKAMYLGGIYDTWAPGGGDVRYITTPTLNPIVIFGYVFRSPFGGDGWVVSVNNMEDLVGGHIWVGVLCIVGGVWHIFTKPFSWARRAFVWSGEAYLSYSLAAISLMGFTASLYSWYNNTAYPSELYGPTGPEASQSQAFTFLVRDQRLGANVSSAQGPTGLGKYLMRSPSGEIIFGGETMRFWDLRAPWVEPLRGPNGLDINKIKNDIQPWQERRAAEYMTHAPL…	100	0	gi|700658182|ref|YP_009093187.1|	photosystem II CP43 chlorophyll apoprotein (chloroplast) [Roundia cardiophora]	96.18	0	sp|P49472|PSBC_ODOSI	Photosystem II CP43 reaction center protein OS=Odontella sinensis GN=psbC PE=3 SV=1	100	0	tr|A0A089VNB1|A0A089VNB1_9STRA	Photosystem II CP43 reaction center protein OS=Roundia cardiophora GN=psbC PE=3 SV=1	-	-	-	-	-	-	-	K02705|1|0.0|746|ccp:CHC_210|	GO:0009772//photosynthetic electron transport in photosystem II;GO:0018298//protein-chromophore linkage	GO:0045156//electron transporter, transferring electrons within the cyclic electron transport pathway of photosynthesis activity;GO:0016168//chlorophyll binding	GO:0030076//light-harvesting complex;GO:0009523//photosystem II;GO:0016021//integral component of membrane;GO:0009535//chloroplast thylakoid membrane
PsbB		YP_004072575.1	photosystem II CP47 chlorophyll apoprotein (chloroplast) [Thalassiosira oceanica CCMP1005]	56392.6	0.234	12	75	XP_002297545.1;ABK20730.1;YP_874507.1;ADB27529.1;EED86185.1	0.418	74	0.002	-2.3	YP_004072575.1	MALPWYRVHTVVLNDPGRLISVHLMHTALVAGWAGSMALYELAVFDPSDPVLNPMWRQGMFVMPFMTRLGITDSWGGWSITGESVSNPGLWSFEGVALSHIVLSGMCFLAAIWHWVYWDLELFRDPRTGEPALDLPKIFGIHLLLSGLLCFGFGAFHVTGLFGPGIWVSDAYGITGKVQPVAPSWGADGFNPFNPGGIAAHHIAAGIFGILAGIFHLTVRPPQRLYRALRMGNIETVLSSSISAVFFAAFVTSGTMWYGAAATPIELFGPTRYQWDSGYFQQEIERQVEASVTEGLSESQAWSRIPDKLAFYDYIGNNPAKGGLFRSGPMDKGDGIAEAWLGHPIFRDKEGRELTVRRMPAFFETFPVILVDKDGIIRADIPFRRAESKYSIEQVGVTV…	100	0	gi|315320519|ref|YP_004072575.1|	photosystem II CP47 chlorophyll apoprotein [Thalassiosira oceanica CCMP1005]	97.05	0	sp|P49471|PSBB_ODOSI	Photosystem II CP47 reaction center protein OS=Odontella sinensis GN=psbB PE=3 SV=1	100	0	tr|E7BWH1|E7BWH1_THAOC	Photosystem II CP47 reaction center protein OS=Thalassiosira oceanica GN=psbB PE=3 SV=1	-	-	-	-	-	-	-	K02704|1|0.0|816|ccp:CHC_440|	GO:0009767//photosynthetic electron transport chain;GO:0018298//protein-chromophore linkage	GO:0016168//chlorophyll binding	GO:0009523//photosystem II;GO:0016021//integral component of membrane;GO:0009535//chloroplast thylakoid membrane
PsbE		AIR75596.1	photosystem II cytochrome b559 alpha subunit (chloroplast) [Cyclotella sp. WC03_2]	9489.82	0.321	2	9	ABK20777.1;YP_009093198.1;AIR76144.1;EJK52346.1;ADB27507.1;XP_002297507.1;sp|A0T0U2.1|PSBE_THAPS;EJK55852.1;EED86147.1;AIR75455.1;YP_004072553.1;AIR75871.1;YP_874554.1;YP_009093471.1	0.322	9	0.002	-2.1	AIR75596.1	MSGGSTGERPFSDIITSVRYWIIHTITIPSLFVSGWLFISTGLAYDVFGTPRPNEYFTQDRQQVPLVNDRFSAKQELEDLTKGL	100	1e-56	gi|118411160|ref|YP_874554.1|	cytochrome b559 alpha chain [Thalassiosira pseudonana]	100	2e-57	sp|A0T0U2|PSBE_THAPS	Cytochrome b559 subunit alpha OS=Thalassiosira pseudonana GN=psbE PE=3 SV=1	100	2e-55	tr|A0A089VHW2|A0A089VHW2_9STRA	Cytochrome b559 subunit alpha OS=Roundia cardiophora GN=psbE PE=3 SV=1	-	-	-	-	-	-	-	K02707|1|4e-55|168|ccp:CHC_1170|	GO:0009767//photosynthetic electron transport chain	GO:0009055//electron carrier activity;GO:0005506//iron ion binding;GO:0020037//heme binding	GO:0009539//photosystem II reaction center;GO:0030096//plasma membrane-derived thylakoid photosystem II;GO:0016021//integral component of membrane;GO:0009535//chloroplast thylakoid membrane
PsbH		YP_004072578.1	photosystem II reaction center protein H (chloroplast) [Thalassiosira oceanica CCMP1005]	7308.97	0.212	3	6	AIR75398.1;XP_002297544.1;EED86184.1;AIR75827.1;YP_009093427.1;YP_874510.1;YP_009093154.1;AIR76100.1;sp|A0T0P8.1|PSBH_THAPS;ABK20733.1;ADB27532.1;AIR75539.1	0.258	6	0.009	-2.7	YP_004072578.1	MALRTRLGEILRPLNAEYGKVVPGWGTTPIMGVTMGLFLVFLLIILQIYNSSLIIENVDVDWANAI	100	3e-32	gi|315320522|ref|YP_004072578.1|	photosystem II reaction center protein H [Thalassiosira oceanica CCMP1005]	96.97	1e-31	sp|A0T0P8|PSBH_THAPS	Photosystem II reaction center protein H OS=Thalassiosira pseudonana GN=psbH PE=3 SV=1	100	7e-31	tr|E7BWH4|E7BWH4_THAOC	Photosystem II reaction center protein H OS=Thalassiosira oceanica GN=psbH PE=3 SV=1	-	-	-	-	-	-	-	K02709|1|8e-24|87.8|ccp:CHC_425|	GO:0050821//protein stabilization;GO:0015979//photosynthesis	GO:0042301//phosphate ion binding	GO:0009523//photosystem II;GO:0016021//integral component of membrane;GO:0009535//chloroplast thylakoid membrane
	Cyt b6/f
PetA		AIR75573.1	cytochrome f (chloroplast) [Cyclotella sp. WC03_2]	34260.9	0.277	3	5	-	0.459	4	0.012	-1.9	AIR75573.1	MATNKFFKSLLFTLTIAISSFGFCVENSFAYPVFAQQGYSNPRAANGKLACANCHLNQKAIEIEAPQGVLPNSVFEIEIKVPYDTTRQQISADGKPADLNVGGILILPKGFKLASKNQISAEVKAKNKGVFISPYSTEFDNILVVGPIAGKTHQELIFPVVAPDPESNPDVKYLTYPFYAGGNRGRGQVYPTGEKSNINSFGAIQAGQITEILTTEKGESKITIVNSDGTATSQTLSAGLKLLVKQGDIVKQDQPLNIDPNVGGFGQEDSEIVLQSSSRILGYLIFCLCLLLTQVLLILKKKQYEKVQAAELNF	100	0	gi|691190060|gb|AIR75573.1|	cytochrome f (chloroplast) [Cyclotella sp. WC03_2]	94.9	0	sp|A0T0R9|CYF_THAPS	Cytochrome f OS=Thalassiosira pseudonana GN=petA PE=3 SV=1	100	0	tr|A0A089VNN2|A0A089VNN2_9STRA	Cytochrome f OS=Cyclotella sp. WC03_2 GN=petA PE=3 SV=1	gi|434384396|ref|YP_007095007.1|	291	4e-96	COG3258	Cytochrome c	C	Energy production and conversion	K02634|1|2e-102|306|ccp:CHC_735| apocytochrome f	GO:0015979//photosynthesis;GO:0022900//electron transport chain	GO:0009055//electron carrier activity;GO:0005506//iron ion binding;GO:0020037//heme binding	GO:0031361//integral component of thylakoid membrane;GO:0009535//chloroplast thylakoid membrane
PsaA	PSI	YP_009093407.1	photosystem I P700 apoprotein A1 (chloroplast) [Thalassiosira weissflogii]	83908.3	0.102	6	24	AIR76080.1	0.392	24	0.002	-1.6	YP_009093407.1	MAISSTERRSKNVQVFVEKDAVETSFAKWAQPGHFSRTLAKGPKTTTWIWNLHADAHDFDSQTNSLEEVSRKIFSAHFGQLAIIFLWISGMHFHGAYFSNYSAWLTDPISIKQSSQVVWPIVGQEILNADVGGNFQGVQTTSGWFQMWRAEGITSEVELYWTAIGGLAMSAIMLFAGWFHYHKAAPKLEWFQNAESMMNHHLAGLLGLGCLSWSGHQIHIALPINKLLDAGVSPQEIPLPHEFIINRDLMAQLYPSFGKGLAPFFSGNWGEYSDFLTFKGGLNPVTGGLWLSDIAHHHLALAVLFIVAGHMYRTNWGIGHNMKEILEAHKGPFTGEGHKGLYEILTTSWHAQLAINLAMMGSLSIIVAHHMYAMPPYPYIATDYATQLSLFTHHMWIGG…	100	0	gi|700082609|ref|YP_009093407.1|	photosystem I P700 apoprotein A1 (chloroplast) [Thalassiosira weissflogii]	98.67	0	sp|A0T0M8|PSAA_THAPS	Photosystem I P700 chlorophyll a apoprotein A1 OS=Thalassiosira pseudonana GN=psaA PE=3 SV=1	100	0	tr|A0A089VNZ5|A0A089VNZ5_THAWE	Photosystem I P700 chlorophyll a apoprotein A1 OS=Thalassiosira weissflogii GN=psaA PE=3 SV=1	gi|37523008|ref|NP_926385.1|	592	0	COG2885	Outer membrane protein OmpA and related peptidoglycan-associated (lipo)proteins	M	Cell wall/membrane/envelope biogenesis	K02689|1|0.0|1330|ccp:CHC_635| photosystem I P700 chlorophyll a apoprotein A1	GO:0018298//protein-chromophore linkage;GO:0015979//photosynthesis;GO:0022900//electron transport chain	GO:0016491//oxidoreductase activity;GO:0009055//electron carrier activity;GO:0000287//magnesium ion binding;GO:0016168//chlorophyll binding;GO:0051539//4 iron, 4 sulfur cluster binding	GO:0016021//integral component of membrane;GO:0009522//photosystem I;GO:0009535//chloroplast thylakoid membrane
PsaB		ADB27549.1	photosystem I P700 chlorophyll a apoprotein A2 (chloroplast) [Thalassiosira oceanica CCMP1005]	82157.9	0.05	3	7	AIR76081.1;EED86194.1;YP_009093136.1;ABK20714.1;sp|A0T0M9.1|PSAB_THAPS;AIR75533.1;XP_002297554.1;YP_009093408.1;YP_874491.1;AIR75809.1;YP_004072596.1;AIR75392.1	0.313	7	0.002	-1.7	ADB27549.1	MATKFPKFSQALAQDPATRRIWYGIATAHDLEAHDGMTEENLYQKIFASHFGHLAIIFLWTAGNLFHVAWQGNFEKWVSNPLKTRPIAHAIWDPHFGEKALKAFSKGNTYPVNISFSGLYQWWYTIGFRTNQELYRASIGVLLLASVLLIAGWLHLQPKFRPSLSWFKNNESRLNHHLSGLLGFSSLAWTGHIVHVAIPASRGVHVGWDNFLTTPPHPAGLTPFFTGNWTVYAENPDTAEHAFNTADGAGTAILTFLGGFHPQTQSLWLTDIAHHHLAIAVVFIVAGHMYRTNFGIGHNMKEILDAHRPPGGRLGAGHVGLFETITNSLHMQLGLALACLGVATSLTAQHMYALTPYAYLSKDFTTEAALYTHHQYIAGFLMVGAFAHGAIFFVRDYDP…	100	0	gi|315320539|ref|YP_004072596.1|	photosystem I P700 chlorophyll a apoprotein A2 [Thalassiosira oceanica CCMP1005]	95.77	0	sp|A0T0M9|PSAB_THAPS	Photosystem I P700 chlorophyll a apoprotein A2 OS=Thalassiosira pseudonana GN=psaB PE=3 SV=1	100	0	tr|E7BWJ2|E7BWJ2_THAOC	Photosystem I P700 chlorophyll a apoprotein A2 OS=Thalassiosira oceanica GN=psaB PE=3 SV=1	gi|37523008|ref|NP_926385.1|	1085	0	COG2885	Outer membrane protein OmpA and related peptidoglycan-associated (lipo)proteins	M	Cell wall/membrane/envelope biogenesis	K02690|1|0.0|1237|cme:CymeCp113|	GO:0018298//protein-chromophore linkage;GO:0015979//photosynthesis;GO:0022900//electron transport chain	GO:0016491//oxidoreductase activity;GO:0009055//electron carrier activity;GO:0000287//magnesium ion binding;GO:0016168//chlorophyll binding;GO:0051539//4 iron, 4 sulfur cluster binding	GO:0016021//integral component of membrane;GO:0009522//photosystem I;GO:0009535//chloroplast thylakoid membrane
PsaF		YP_009093479.1	photosystem I subunit III (chloroplast) [Thalassiosira weissflogii]	20532.8	0.265	3	15	AIR76152.1	0.563	15	0.002	0.8	YP_009093479.1	MKRVNLLSLLFAVLIALVPNQAFAEIGGLTKCSESPAFTKRLNASVKKLEQRASQYEADSPPALALKQQIERTQARFDKYSRSELLCGTDGLPHLVADGRWSHAAEFILPGFGFIYISGWIGWVGRKYLRAVSTSANPSESEIIINVPLALKIMTTGYIWPISAWQELISNDLVAVSEEITVSPR	100	5e-124	gi|700082681|ref|YP_009093479.1|	photosystem I subunit III (chloroplast) [Thalassiosira weissflogii]	86.49	2e-112	sp|P49483|PSAF_ODOSI	Photosystem I reaction center subunit III OS=Odontella sinensis GN=psaF PE=3 SV=1	100	1e-122	tr|A0A089VKJ7|A0A089VKJ7_THAWE	Photosystem I subunit III OS=Thalassiosira weissflogii GN=psaF PE=4 SV=1	-	-	-	-	-	-	-	K02694|1|1e-75|228|ccp:CHC_25|	GO:0015979//photosynthesis		GO:0009538//photosystem I reaction center;GO:0016021//integral component of membrane;GO:0009535//chloroplast thylakoid membrane
	F-type ATPase
beta		AIR75846.1	ATP synthase CF1 epsilon subunit (chloroplast) [Roundia cardiophora]	14455.7	0.173	2	9	sp|A0T0R7.1|ATPE_THAPS;YP_009093173.1;AIR75571.1;AIR75430.1;YP_009093446.1;AIR76119.1;ABK20752.1;YP_874529.1	0.386	9	0.005	-1.4	AIR75846.1	MVMNIRVLTPDRVICSTTADEVILPGLTGQVGVLDGHATLITALDTGLLRIKLAEKWTPIILCGGLAEIDRNRVTVLVNDVEELISVELDEATKELEKATSAIENAETSKARLDASIELKKATARLEGINYLS	100	1e-89	gi|700658168|ref|YP_009093173.1|	ATP synthase CF1 epsilon subunit (chloroplast) [Roundia cardiophora]	95.49	2e-87	sp|A0T0R7|ATPE_THAPS	ATP synthase epsilon chain, chloroplastic OS=Thalassiosira pseudonana GN=atpE PE=3 SV=1	100	2e-88	tr|A0A089VHT4|A0A089VHT4_9STRA	ATP synthase epsilon chain, chloroplastic OS=Roundia cardiophora GN=atpE PE=3 SV=1	gi|434387408|ref|YP_007098019.1|	121	1e-34	COG0355	FoF1-type ATP synthase, epsilon subunit	C	Energy production and conversion	K02112|1|1e-34|129|gsl:Gasu_40560| F-type H+-transporting ATPase subunit beta [EC:3.6.3.14]!K02114|2|4e-33|116|cvr:ChvaP_p079| F-type H+-transporting ATPase subunit epsilon	GO:0042777//plasma membrane ATP synthesis coupled proton transport	GO:0046933//proton-transporting ATP synthase activity, rotational mechanism;GO:0005524//ATP binding;GO:0046961//proton-transporting ATPase activity, rotational mechanism	GO:0045261//proton-transporting ATP synthase complex, catalytic core F(1);GO:0009535//chloroplast thylakoid membrane;GO:0005886//plasma membrane
alpha		ABK20727.1	ATP synthase CF0 B chain subunit I (chloroplast) [Thalassiosira pseudonana]	19998	0.229	4	12	YP_874504.1;sp|A0T0P2.1|ATPF_THAPS;EED86188.1;XP_002297548.1	0.3	12	0.004	-1.7	ABK20727.1	MENFNQIFTVLAASEGIGLNLDILETGLLNILALVAILVYTGKDFLGSILQERKSTIVKSVQDAEDRLNEANRRLSEAQKQLSQAHVVISEIRNETKTAKTNLLKSDATTAKKELTTRFNRAISSFRSKERVIFLDVKQQIISLVLKRSAIQAKETFGSKKRARALINETIQKLEGDLL	100	3e-113	gi|118411110|ref|YP_874504.1|	ATP synthase CF0 B chain subunit I [Thalassiosira pseudonana]	100	6e-114	sp|A0T0P2|ATPF_THAPS	ATP synthase subunit b, chloroplastic OS=Thalassiosira pseudonana GN=atpF PE=3 SV=1	100	8e-112	tr|B8LER3|B8LER3_THAPS	Plastid thylakoid ATPase subunit, plastid protein OS=Thalassiosira pseudonana GN=atpF PE=3 SV=1	gi|428202063|ref|YP_007080652.1|	88.2	1e-20	COG0711	FoF1-type ATP synthase, membrane subunit b or b'	C	Energy production and conversion	K02111|1|1e-11|65.9|gsl:Gasu_40630| F-type H+-transporting ATPase subunit alpha [EC:3.6.3.14]!K02109|2|6e-09|56.2|ppp:PhpapaCp054| F-type H+-transporting ATPase subunit b	GO:0042777//plasma membrane ATP synthesis coupled proton transport	GO:0046933//proton-transporting ATP synthase activity, rotational mechanism;GO:0005524//ATP binding	GO:0016021//integral component of membrane;GO:0045263//proton-transporting ATP synthase complex, coupling factor F(o);GO:0009535//chloroplast thylakoid membrane;GO:0005886//plasma membrane
alpha		ADB27544.1	ATP synthase CF0 subunit II B' chain (chloroplast) [Thalassiosira oceanica CCMP1005]	17353.3	0.179	2	7	YP_004072590.1	0.591	7	0.023	-0.8	ADB27544.1	MINPSILISNSEVSGPGGLFDIGATLPLVAIQFILLMVLLNIILYSPLLTIIEERKEYILSHLAEASEKLAQAKELTTQYEQDLETARKEAQLEIANSQNIHKEILDIELDISQKYIDNLLETISSDLLNKKKTALDTLDSSVQALCTEVESKLSI	100	2e-106	gi|315320534|ref|YP_004072590.1|	ATP synthase CF0 subunit II B' chain [Thalassiosira oceanica CCMP1005]	92.31	4e-98	sp|A0T0P1|ATPX_THAPS	ATP synthase subunit b', chloroplastic OS=Thalassiosira pseudonana GN=atpG PE=3 SV=1	100	6e-105	tr|E7BWI6|E7BWI6_THAOC	ATP synthase subunit b', chloroplastic OS=Thalassiosira oceanica GN=atpG PE=3 SV=1	gi|113475843|ref|YP_721904.1|	108	5e-29	COG0711	FoF1-type ATP synthase, membrane subunit b or b'	C	Energy production and conversion	K02111|1|2e-17|82.0|gsl:Gasu_40630| F-type H+-transporting ATPase subunit alpha [EC:3.6.3.14]!K02109|2|6e-16|73.9|ppp:PHYPADRAFT_142087| F-type H+-transporting ATPase subunit b	GO:0030168//platelet activation;GO:0051258//protein polymerization;GO:0015986//ATP synthesis coupled proton transport;GO:0007165//signal transduction	GO:0005102//receptor binding;GO:0015078//hydrogen ion transmembrane transporter activity;GO:0030674//protein binding, bridging;GO:0005524//ATP binding	GO:0016021//integral component of membrane;GO:0005577//fibrinogen complex;GO:0045263//proton-transporting ATP synthase complex, coupling factor F(o);GO:0009535//chloroplast thylakoid membrane
gamma		XP_002289138.1	ATP synthase [Thalassiosira pseudonana CCMP1335]	40062.7	0.109	2	10	EED92675.1	0.455	10	0.002	-1.1	XP_002289138.1	MKFLVVAVSALATASAFTTSPASFTTVSSPSVNNVFGQEGNAHRNRRATIVMDGKANAIRDRITSVNNTKKITSAMKLVAAAKVRRAQDSVLATRPFSETLQSVFGGLINRLGGEAADLPLLTQREVNKVTITVITGDRGLCGGYNSFMIKKAEARYKELTAQGIECDFILIGKKGASYFARREYPIRKVFDCGQNPNSKEALAISEEIINSFLSGETDAVELLYTKFVSLIASSPSVRTLVPFSASEISQKGDEVFQLTSQDGDFGVERKELEVAEPQDFPNDMIFEQDPLQIVNSILPLYLNGQILRTLQESVASELAARMQSMQSASDNAKALAKRLSQEYNRARQAAVTQEILEIVSGATALE	100	0	gi|223998931|ref|XP_002289138.1|	ATP synthase [Thalassiosira pseudonana CCMP1335]	84.23	0	sp|Q06908|ATPG_ODOSI	ATP synthase gamma chain, chloroplastic OS=Odontella sinensis GN=ATPC PE=1 SV=1	100	0	tr|B8C0W4|B8C0W4_THAPS	ATP synthase OS=Thalassiosira pseudonana GN=THAPSDRAFT_40156 PE=3 SV=1	gi|428769152|ref|YP_007160942.1|	355	1e-120	COG0224	FoF1-type ATP synthase, gamma subunit	C	Energy production and conversion	K02115|1|1e-139|402|ccp:CHC_T00008719001| F-type H+-transporting ATPase subunit gamma	GO:0042777//plasma membrane ATP synthesis coupled proton transport	GO:0046933//proton-transporting ATP synthase activity, rotational mechanism;GO:0005524//ATP binding;GO:0046961//proton-transporting ATPase activity, rotational mechanism	GO:0045261//proton-transporting ATP synthase complex, catalytic core F(1);GO:0009535//chloroplast thylakoid membrane;GO:0005886//plasma membrane
	Lhca1	EJK46744.1	hypothetical protein THAOC_34573 [Thalassiosira oceanica]	26715.3	0.036	3	10	EED94820.1;XP_002287377.1	0.138	10	0.002	-0.5	EJK46744.1	MKLAIAALTAATASAFAPAQTDRSSTALNVQWTEGTKALPFGSSPDTLDGSLPGDVGFDPIGFSTQPFASFNNPLYVEGNFMSDLEWLREAELAHGRIAQLAVVGFLWPGLFGTLPGAEGYADFSELNPFKALSTVPESAIYQIIGGCAWFEYQRVVRIKEQGANRVVGDIGIGYPGAFNPLNLNYTPEEFAEKQLQEIKHCRLAMIAAFGLICQANNSGTDVISQLAPAFEAPEYAAKAGYFLPQGI	100	2e-168	gi|397569437|gb|EJK46744.1|	hypothetical protein THAOC_34573 [Thalassiosira oceanica]	31.75	8e-15	sp|P04778|CB1C_ARATH	Chlorophyll a-b binding protein 1, chloroplastic OS=Arabidopsis thaliana GN=LHCB1.3 PE=1 SV=1	100	6e-167	tr|K0R4S5|K0R4S5_THAOC	Uncharacterized protein OS=Thalassiosira oceanica GN=THAOC_34573 PE=4 SV=1	-	-	-	-	-	-	-	K08907|1|1e-26|106|ccp:CHC_T00008505001|	GO:0009765//photosynthesis, light harvesting		GO:0016020//membrane;GO:0009507//chloroplast
		CAI44219.1	fucoxanthin chlorophyll a/c binding protein, partial [Cyclotella cryptica]	3421.61	0.312	3	3	CAA06733.1;XP_002290650.1;EED92402.1	0.186	3	0.002	-0.7	CAI44219.1	MSRSIPFLTVPEKLDGSMPGDMGFDPMGLSDI	100	6e-15	gi|84871814|emb|CAI44219.1|	fucoxanthin chlorophyll a/c binding protein [Cyclotella cryptica]	-	-	-	-	100	2e-13	tr|Q2PC10|Q2PC10_9STRA	Fucoxanthin chlorophyll a/c binding protein (Fragment) OS=Cyclotella cryptica GN=fcp4 PE=4 SV=1	-	-	-	-	-	-	-	K08907|1|4e-09|51.6|ccp:CHC_T00008505001|	-	-	-
		AAB70098.1	fucoxanthin-chlorophyll a/c light-harvesting protein, partial [Skeletonema costatum]	20722.5	0.111	2	8	-	0.23	7	0.002	0.4	AAB70098.1	MKSVIFAAAIASAAAFAPAQVGKTTTSLNAFESELGAQAPLGFWDPLGFLDRADQETFDRLRYVELKHGRVSQLAFVGNLITRAGYHLPGNITPDSTFDSYPNGLAAINGADAIPTLRLIQTLAFIGFLELKVITDVTGDSQFAGDFRNGFDFGWDKQSPEWQEQKRAVELNQGRAAMMGILELMVHEQL	100	1e-124	gi|1778719|gb|AAB70098.1|	fucoxanthin-chlorophyll a/c light-harvesting protein, partial [Skeletonema costatum]	64.94	2e-73	sp|Q42395|FCP_ODOSI	Fucoxanthin-chlorophyll a-c binding protein, chloroplastic OS=Odontella sinensis GN=FCPA PE=2 SV=1	100	3e-123	tr|P93855|P93855_SKECO	Fucoxanthin-chlorophyll a/c light-harvesting protein (Fragment) OS=Skeletonema costatum GN=scfcpB PE=2 SV=1	-	-	-	-	-	-	-	K08907|1|4e-11|63.2|gsl:Gasu_15240|	GO:0044237//cellular metabolic process		GO:0043234//protein complex;GO:0034357//photosynthetic membrane;GO:0009507//chloroplast;GO:0044425//membrane part
		CAA04226.1	fucoxanthin chlorophyll a /c protein, partial [Cyclotella cryptica]	20393.4	0.131	1	9	CAA04400.1;CAA04178.1	0.432	9	0.027	-0.2	CAA04226.1	LIASAAAFAPAQTGKATTSLAAFENELGAQPPLGFFDPLGLLDGADQERFDRLRYVELKHGRICQLAFLGQITTRAGFRLPGDISYDGTKFSDIGEGWAGSLQVPVAGALQILAFVGFLELAVMKDVTGEGEFVGDFRNGALDFGWDTFDEETKLSKRAIELNNGRAAMMGILGLMVHEQLGGSVPIVGEL	98.95	1e-120	gi|2996369|emb|CAA04400.1|	fucoxanthin chlorophyll a/c binding protein [Cyclotella cryptica]	77.17	4e-85	sp|Q42395|FCP_ODOSI	Fucoxanthin-chlorophyll a-c binding protein, chloroplastic OS=Odontella sinensis GN=FCPA PE=2 SV=1	98.95	3e-119	tr|O65889|O65889_9STRA	Fucoxanthin chlorophyll a/c binding protein OS=Cyclotella cryptica GN=fcp03 PE=2 SV=1	-	-	-	-	-	-	-	K08907|1|3e-12|65.9|gsl:Gasu_15240|	GO:0044237//cellular metabolic process		GO:0043234//protein complex;GO:0034357//photosynthetic membrane;GO:0009507//chloroplast;GO:0044425//membrane part
		EED95211.1	fucoxanthin chlorophyll a/c protein [Thalassiosira pseudonana CCMP1335]	27423.7	0.031	4	10	XP_002287768.1;EJK77608.1	0.421	8	0.002	-0.4	EED95211.1	MKSVAASLLLASTCAAFAPSNNGAAVKTSLDAMPDRMWNKMVDKTQRSASMPFLPRPINLDGSYVGDVGFDPFYLSSIDKNFAGFIQPPSWEETNGLPTLYWMREAELKHGRVAMLAWTGWLATDGALGPVPLRFPGAAYQAVPNSLSAHDIMVDQGSLGFMLVAIGIIEVCCATVLVEVSKGESDRAAGDFKLDPLQFLKGKSDADINTMKLKELQNGRAAMMAFAGVVTQAALGGTDFPYLVPYPNVADVTW	100	6e-176	gi|223996189|ref|XP_002287768.1|	fucoxanthin chlorophyll a/c protein [Thalassiosira pseudonana CCMP1335]	32.65	7e-13	sp|Q9SDM1|CB121_HORVU	Chlorophyll a-b binding protein 1B-21, chloroplastic OS=Hordeum vulgare GN=LHC Ib-21 PE=1 SV=1	100	2e-174	tr|B8BU32|B8BU32_THAPS	Fucoxanthin chlorophyll a/c protein OS=Thalassiosira pseudonana GN=Lhcr12 PE=4 SV=1	-	-	-	-	-	-	-	K08907|1|2e-21|93.2|gsl:Gasu_11610|	GO:0009765//photosynthesis, light harvesting		GO:0016020//membrane;GO:0009507//chloroplast
		AAB70106.1	fucoxanthin-chlorophyll a/c light-harvesting protein, partial [Skeletonema costatum]	20198.4	0.151	3	14	AAB80924.1	0.485	15	0.015	0.9	AAB70106.1	MKSAIIAALISAPFAPAQTGKATRLNAFESELGAQPPLGFFDPLGLLLMRQERFDRLRYVELKHGRISQLAFLGQITTRAGVRLPGDIDYYGTSFADIGEGWSGSLQVPVAGALQILAFVGFLELGVMKDIEGTGNEHVGDFRNGALDFGWDTFDEETKLSKRAIELNNGRAAMMGILGLMVHEQL	100	9e-121	gi|1778735|gb|AAB70106.1|	fucoxanthin-chlorophyll a/c light-harvesting protein, partial [Skeletonema costatum]	74.29	5e-70	sp|Q42395|FCP_ODOSI	Fucoxanthin-chlorophyll a-c binding protein, chloroplastic OS=Odontella sinensis GN=FCPA PE=2 SV=1	100	2e-119	tr|P93863|P93863_SKECO	Fucoxanthin-chlorophyll a/c light-harvesting protein (Fragment) OS=Skeletonema costatum GN=scfcpG PE=2 SV=1	-	-	-	-	-	-	-	K08907|1|4e-09|57.4|gsl:Gasu_15240|	-	-	-
	Lhca2
		CAA04403.1	fucoxanthin chlorophyll a/c binding protein, partial [Cyclotella cryptica]	20937.6	0.131	2	13	XP_002295184.1;EED87488.1;XP_002295258.1;EED87562.1;CAA04406.1;CAA04404.1;CAA04402.1;CAA04405.1;CAA04407.1	0.574	12	0.005	-0.8	CAA04403.1	GSAVAFAPAATRASSSGLNAFSAADLPGALPPVGFFDPLGFAEKADEKTLKRYREAEVTHGRVAMLAVIGFLVGEAVEGSSFLFDAQISGPAITHFTQVPDGWDALIVTFIGAAEAQRAQIGWVDPADASYDQPGLLRDNYYPGDIGFDPLGLKPEDPEELNIMITKELQNGRLAMLAAAGFLAQEAVDGKGILEHFSS	100	6e-142	gi|2996375|emb|CAA04403.1|	fucoxanthin chlorophyll a/c binding protein, partial [Cyclotella cryptica]	48.35	2e-45	sp|Q03965|L181_CHLMO	Chlorophyll a-b binding protein L1818, chloroplastic OS=Chlamydomonas moewusii GN=L1818 PE=2 SV=1	100	2e-140	tr|O65891|O65891_9STRA	Fucoxanthin chlorophyll a/c binding protein (Fragment) OS=Cyclotella cryptica GN=fcp07 PE=2 SV=1	-	-	-	-	-	-	-	K08907|1|2e-55|179|cre:CHLREDRAFT_184730| !K08908|3|2e-19|86.7|cit:102607051|	GO:0009765//photosynthesis, light harvesting		GO:0016020//membrane;GO:0009507//chloroplast
	Lhca4	EED87666.1	predicted protein [Thalassiosira pseudonana CCMP1335]	26043.1	0.075	2	11	XP_002294886.1	0.596	11	0.012	-0.5	EED87666.1	MKLSLLSVLIGSAVGFTATSSARTSVSTKAAIDDLKSIAEKSNPVLKFYDPLELSSTTIWDNTNDQTIAFLRHSEIKHGRVAMAAFVGYIVQSNGIHFPWPMSFDGTPFPYAAGSPPEQWDALSDEAKWQIILFIGFLEWFSEATGTHYMRGGVPGAYPKFSDSDVIPHPVPLNLFDPFGFSEGKSAEAKANGLIKELNNGRLAMIGIMGFISEQRVEGSVPLLKGLVAHYDGETMAPFA	100	4e-165	gi|224012467|ref|XP_002294886.1|	predicted protein [Thalassiosira pseudonana CCMP1335]	32.11	5e-17	sp|Q42395|FCP_ODOSI	Fucoxanthin-chlorophyll a-c binding protein, chloroplastic OS=Odontella sinensis GN=FCPA PE=2 SV=1	100	1e-163	tr|B8CFP9|B8CFP9_THAPS	Uncharacterized protein OS=Thalassiosira pseudonana GN=THAPSDRAFT_270092 PE=4 SV=1	-	-	-	-	-	-	-	K08907|1|1e-12|68.2|gsl:Gasu_15240| !K08910|5|4e-10|62.0|cre:CHLREDRAFT_186299|	-	-	-
Table S3	Downregultion of photosynthesis proteins in lower temperature cells
Gene	Complex	Protein_ID	Description	Mass	Protein_Coverage	Uniq_Pep_Num	Uniq_Spec_Num	Sameset	Ratio_Control-VS-Low temperature	Quant_Num_Control-VS-Low temperature	Qvalue_Control-VS-Low temperature	Fold change	Protein_ID	Protein_Seqence	NCBInr Identity	NCBInr E-value	NCBInr Accession	NCBInr Description	Swissprot Identity	Swissprot E-value	Swissprot Accession	Swissprot Description	Tremble Identity	Tremble E-value	Tremble Accession	Tremble Description	Protein_or_Domain	COG Score	COG E-value	COG ID	COG Function-Description	COG Code	COG Function-Categories	KEGG(ko_id|rank|evalue|score|identity|ko_definition)	GO Biological_Process	GO Molecular_Function	GO Cellular_Component
PsbD	PSII	sp|A0T0T0.1|PSBD_THAPS	RecName: Full=Photosystem II D2 protein; Short=PSII D2 protein; AltName: Full=Photosystem Q(A) protein	39248.7	0.168	2	14	AIR75584.1;YP_009093186.1;AIR75443.1;ADB27516.1;EJK55847.1;EJK54216.1;ABK20765.1;EJK52340.1;YP_874542.1;YP_004072562.1;AIR75859.1	0.576	14	0.003	-0.8	sp|A0T0T0.1|PSBD_THAPS	MTIAIGQNQERGLFDLVDDWLKRDRFVFVGWSGILLFPTAYLAAGGWFTGTTFVTSWYTHGLASSYLEGCNFLTAAVSTPANSMGHSLLLLWGPEAQGDFTRWCQIGGLWAFIALHGAFGLIGFCLRQFEIARLVGIRPYNAIAFSGPIAVFVSVFLLYPLGQASWFFAPSFGVAAIFRFLLFLQGFHNWTLNPFHMMGVAGILGGALLCAIHGATVENTLFEDGDAANTFRAFTPTQSEETYSMVTANRFWSQIFGVAFSNKRWLHFFMLFVPVAGLWTSSIGIVGLALNLRAYDFVSQELRAAEDPEFETFYTKNILLNEGIRSWMAAQDQPHENFVFPEEVLPRGNAL	100	0	gi|118411148|ref|YP_874542.1|	photosystem II reaction center protein D2 [Thalassiosira pseudonana]	100	0	sp|A0T0T0|PSBD_THAPS	Photosystem II D2 protein OS=Thalassiosira pseudonana GN=psbD PE=3 SV=1	99.15	0	tr|A0A089VN83|A0A089VN83_9STRA	Photosystem II D2 protein OS=Cyclotella sp. L04_2 GN=psbD PE=3 SV=1	-	-	-	-	-	-	-	K02706|1|0.0|684|ccp:CHC_205|	GO:0009772//photosynthetic electron transport in photosystem II	GO:0016491//oxidoreductase activity;GO:0045156//electron transporter, transferring electrons within the cyclic electron transport pathway of photosynthesis activity;GO:0005506//iron ion binding	GO:0030076//light-harvesting complex;GO:0009523//photosystem II;GO:0016021//integral component of membrane;GO:0009535//chloroplast thylakoid membrane
PsbB		YP_004072575.1	photosystem II CP47 chlorophyll apoprotein (chloroplast) [Thalassiosira oceanica CCMP1005]	56392.6	0.234	12	75	XP_002297545.1;ABK20730.1;YP_874507.1;ADB27529.1;EED86185.1	0.689	75	0.002	-0.5	YP_004072575.1	MALPWYRVHTVVLNDPGRLISVHLMHTALVAGWAGSMALYELAVFDPSDPVLNPMWRQGMFVMPFMTRLGITDSWGGWSITGESVSNPGLWSFEGVALSHIVLSGMCFLAAIWHWVYWDLELFRDPRTGEPALDLPKIFGIHLLLSGLLCFGFGAFHVTGLFGPGIWVSDAYGITGKVQPVAPSWGADGFNPFNPGGIAAHHIAAGIFGILAGIFHLTVRPPQRLYRALRMGNIETVLSSSISAVFFAAFVTSGTMWYGAAATPIELFGPTRYQWDSGYFQQEIERQVEASVTEGLSESQAWSRIPDKLAFYDYIGNNPAKGGLFRSGPMDKGDGIAEAWLGHPIFRDKEGRELTVRRMPAFFETFPVILVDKDGIIRADIPFRRAESKYSIEQVGVTV…	100	0	gi|315320519|ref|YP_004072575.1|	photosystem II CP47 chlorophyll apoprotein [Thalassiosira oceanica CCMP1005]	97.05	0	sp|P49471|PSBB_ODOSI	Photosystem II CP47 reaction center protein OS=Odontella sinensis GN=psbB PE=3 SV=1	100	0	tr|E7BWH1|E7BWH1_THAOC	Photosystem II CP47 reaction center protein OS=Thalassiosira oceanica GN=psbB PE=3 SV=1	-	-	-	-	-	-	-	K02704|1|0.0|816|ccp:CHC_440|	GO:0009767//photosynthetic electron transport chain;GO:0018298//protein-chromophore linkage	GO:0016168//chlorophyll binding	GO:0009523//photosystem II;GO:0016021//integral component of membrane;GO:0009535//chloroplast thylakoid membrane
PsbE		AIR75596.1	photosystem II cytochrome b559 alpha subunit (chloroplast) [Cyclotella sp. WC03_2]	9489.82	0.321	2	9	ABK20777.1;YP_009093198.1;AIR76144.1;EJK52346.1;ADB27507.1;XP_002297507.1;sp|A0T0U2.1|PSBE_THAPS;EJK55852.1;EED86147.1;AIR75455.1;YP_004072553.1;AIR75871.1;YP_874554.1;YP_009093471.1	0.487	9	0.004	-0.8	AIR75596.1	MSGGSTGERPFSDIITSVRYWIIHTITIPSLFVSGWLFISTGLAYDVFGTPRPNEYFTQDRQQVPLVNDRFSAKQELEDLTKGL	100	1e-56	gi|118411160|ref|YP_874554.1|	cytochrome b559 alpha chain [Thalassiosira pseudonana]	100	2e-57	sp|A0T0U2|PSBE_THAPS	Cytochrome b559 subunit alpha OS=Thalassiosira pseudonana GN=psbE PE=3 SV=1	100	2e-55	tr|A0A089VHW2|A0A089VHW2_9STRA	Cytochrome b559 subunit alpha OS=Roundia cardiophora GN=psbE PE=3 SV=1	-	-	-	-	-	-	-	K02707|1|4e-55|168|ccp:CHC_1170|	GO:0009767//photosynthetic electron transport chain	GO:0009055//electron carrier activity;GO:0005506//iron ion binding;GO:0020037//heme binding	GO:0009539//photosystem II reaction center;GO:0030096//plasma membrane-derived thylakoid photosystem II;GO:0016021//integral component of membrane;GO:0009535//chloroplast thylakoid membrane
PsbH		YP_004072578.1	photosystem II reaction center protein H (chloroplast) [Thalassiosira oceanica CCMP1005]	7308.97	0.212	3	6	AIR75398.1;XP_002297544.1;EED86184.1;AIR75827.1;YP_009093427.1;YP_874510.1;YP_009093154.1;AIR76100.1;sp|A0T0P8.1|PSBH_THAPS;ABK20733.1;ADB27532.1;AIR75539.1	0.233	5	0.002	-1.1	YP_004072578.1	MALRTRLGEILRPLNAEYGKVVPGWGTTPIMGVTMGLFLVFLLIILQIYNSSLIIENVDVDWANAI	100	3e-32	gi|315320522|ref|YP_004072578.1|	photosystem II reaction center protein H [Thalassiosira oceanica CCMP1005]	96.97	1e-31	sp|A0T0P8|PSBH_THAPS	Photosystem II reaction center protein H OS=Thalassiosira pseudonana GN=psbH PE=3 SV=1	100	7e-31	tr|E7BWH4|E7BWH4_THAOC	Photosystem II reaction center protein H OS=Thalassiosira oceanica GN=psbH PE=3 SV=1	-	-	-	-	-	-	-	K02709|1|8e-24|87.8|ccp:CHC_425|	GO:0050821//protein stabilization;GO:0015979//photosynthesis	GO:0042301//phosphate ion binding	GO:0009523//photosystem II;GO:0016021//integral component of membrane;GO:0009535//chloroplast thylakoid membrane
	Cyt b6/f
PetA		AIR75573.1	cytochrome f (chloroplast) [Cyclotella sp. WC03_2]	34260.9	0.277	3	5	-	0.34	5	0.002	-0.6	AIR75573.1	MATNKFFKSLLFTLTIAISSFGFCVENSFAYPVFAQQGYSNPRAANGKLACANCHLNQKAIEIEAPQGVLPNSVFEIEIKVPYDTTRQQISADGKPADLNVGGILILPKGFKLASKNQISAEVKAKNKGVFISPYSTEFDNILVVGPIAGKTHQELIFPVVAPDPESNPDVKYLTYPFYAGGNRGRGQVYPTGEKSNINSFGAIQAGQITEILTTEKGESKITIVNSDGTATSQTLSAGLKLLVKQGDIVKQDQPLNIDPNVGGFGQEDSEIVLQSSSRILGYLIFCLCLLLTQVLLILKKKQYEKVQAAELNF	100	0	gi|691190060|gb|AIR75573.1|	cytochrome f (chloroplast) [Cyclotella sp. WC03_2]	94.9	0	sp|A0T0R9|CYF_THAPS	Cytochrome f OS=Thalassiosira pseudonana GN=petA PE=3 SV=1	100	0	tr|A0A089VNN2|A0A089VNN2_9STRA	Cytochrome f OS=Cyclotella sp. WC03_2 GN=petA PE=3 SV=1	gi|434384396|ref|YP_007095007.1|	291	4e-96	COG3258	Cytochrome c	C	Energy production and conversion	K02634|1|2e-102|306|ccp:CHC_735| apocytochrome f	GO:0015979//photosynthesis;GO:0022900//electron transport chain	GO:0009055//electron carrier activity;GO:0005506//iron ion binding;GO:0020037//heme binding	GO:0031361//integral component of thylakoid membrane;GO:0009535//chloroplast thylakoid membrane
PetC		EED94931.1	predicted protein [Thalassiosira pseudonana CCMP1335]	22428.2	0.321	5	39	XP_002287488.1	0.46	38	0.002	-0.5	EED94931.1	MKLLSLLSMALIGGSSAFAPAPVVNSRAVTPMSMSAAEGEFYIDQNRRNLMNLILVGSAAVTVGGLAVPYILFFVPPGAGGGEGGTPAKDALGNEIFAKEYLATKKAGDHSLAQGLKGDATYLIVKEDGTLQDYGLNAVCTHLGCVVPWSAANNKFMCPCHGSQYAPTGAVVRGPAPLPLALAHLDVDESGKVVFSTWSETDFRTDGKPWWM	100	2e-141	gi|223995629|ref|XP_002287488.1|	predicted protein [Thalassiosira pseudonana CCMP1335]	62.93	3e-74	sp|Q9SBN3|UCRIA_VOLCA	Cytochrome b6-f complex iron-sulfur subunit, chloroplastic OS=Volvox carteri GN=petC PE=2 SV=1	100	4e-140	tr|B8BVG6|B8BVG6_THAPS	Cytochrome b6-f complex iron-sulfur subunit OS=Thalassiosira pseudonana GN=THAPSDRAFT_270229 PE=4 SV=1	gi|428219285|ref|YP_007103750.1|	221	4e-72	COG0723	Rieske Fe-S protein	C	Energy production and conversion	K02636|1|4e-74|226|vcn:VOLCADRAFT_109628| cytochrome b6-f complex iron-sulfur subunit [EC:1.10.9.1]	GO:0022900//electron transport chain	GO:0008121//ubiquinol-cytochrome-c reductase activity;GO:0051537//2 iron, 2 sulfur cluster binding;GO:0046872//metal ion binding;GO:0009496//plastoquinol--plastocyanin reductase activity	GO:0016021//integral component of membrane;GO:0044435//plastid part;GO:0042651//thylakoid membrane
	PSI
PsaF		YP_009093479.1	photosystem I subunit III (chloroplast) [Thalassiosira weissflogii]	20532.8	0.265	3	15	AIR76152.1	0.455	13	0.002	-1.7	YP_009093479.1	MKRVNLLSLLFAVLIALVPNQAFAEIGGLTKCSESPAFTKRLNASVKKLEQRASQYEADSPPALALKQQIERTQARFDKYSRSELLCGTDGLPHLVADGRWSHAAEFILPGFGFIYISGWIGWVGRKYLRAVSTSANPSESEIIINVPLALKIMTTGYIWPISAWQELISNDLVAVSEEITVSPR	100	5e-124	gi|700082681|ref|YP_009093479.1|	photosystem I subunit III (chloroplast) [Thalassiosira weissflogii]	86.49	2e-112	sp|P49483|PSAF_ODOSI	Photosystem I reaction center subunit III OS=Odontella sinensis GN=psaF PE=3 SV=1	100	1e-122	tr|A0A089VKJ7|A0A089VKJ7_THAWE	Photosystem I subunit III OS=Thalassiosira weissflogii GN=psaF PE=4 SV=1	-	-	-	-	-	-	-	K02694|1|1e-75|228|ccp:CHC_25|	GO:0015979//photosynthesis		GO:0009538//photosystem I reaction center;GO:0016021//integral component of membrane;GO:0009535//chloroplast thylakoid membrane
beta	F-type ATPase	AIR75846.1	ATP synthase CF1 epsilon subunit (chloroplast) [Roundia cardiophora]	14455.7	0.173	2	9	sp|A0T0R7.1|ATPE_THAPS;YP_009093173.1;AIR75571.1;AIR75430.1;YP_009093446.1;AIR76119.1;ABK20752.1;YP_874529.1	0.286	9	0.004	-1.8	AIR75846.1	MVMNIRVLTPDRVICSTTADEVILPGLTGQVGVLDGHATLITALDTGLLRIKLAEKWTPIILCGGLAEIDRNRVTVLVNDVEELISVELDEATKELEKATSAIENAETSKARLDASIELKKATARLEGINYLS	100	1e-89	gi|700658168|ref|YP_009093173.1|	ATP synthase CF1 epsilon subunit (chloroplast) [Roundia cardiophora]	95.49	2e-87	sp|A0T0R7|ATPE_THAPS	ATP synthase epsilon chain, chloroplastic OS=Thalassiosira pseudonana GN=atpE PE=3 SV=1	100	2e-88	tr|A0A089VHT4|A0A089VHT4_9STRA	ATP synthase epsilon chain, chloroplastic OS=Roundia cardiophora GN=atpE PE=3 SV=1	gi|434387408|ref|YP_007098019.1|	121	1e-34	COG0355	FoF1-type ATP synthase, epsilon subunit	C	Energy production and conversion	K02112|1|1e-34|129|gsl:Gasu_40560| F-type H+-transporting ATPase subunit beta [EC:3.6.3.14]!K02114|2|4e-33|116|cvr:ChvaP_p079| F-type H+-transporting ATPase subunit epsilon	GO:0042777//plasma membrane ATP synthesis coupled proton transport	GO:0046933//proton-transporting ATP synthase activity, rotational mechanism;GO:0005524//ATP binding;GO:0046961//proton-transporting ATPase activity, rotational mechanism	GO:0045261//proton-transporting ATP synthase complex, catalytic core F(1);GO:0009535//chloroplast thylakoid membrane;GO:0005886//plasma membrane
beta		AKF18188.1	ATP synthase beta subunit, partial (chloroplast) [Cyclotella meneghiniana]	46169	0.364	5	19	AKF18228.1;AKF18168.1;sp|A0T0R6.1|ATPB_THAPS;XP_002297536.1;EED86176.1;YP_874528.1;ABK20751.1;AIR75570.1;AIR75429.1	0.459	19	0.002	-1.1	AKF18188.1	LPPIYSAIKIETADGIGNIVEVQQLLGDNKVRAVSMRSTDGLKRGVEAVDLGAPITVPVGVPTLGRIFNVIGEPVDEQGDVKIEQTLPIHRDAPAFTELETKPSIFETGIKVVDLLAPYRRGGKIGLFGGAGVGKTVLIMELINNIAKAHGGVSVFGGVGERTREGNDLYEEMKESGVINSKNFSESKVALVYGQMNEPPGARMRVGLTALTMAEYFRDVNKQDVLLFIDNIFRFTQAGSEVSALLGRMPSAVGYQPTLATEMGALQERITSTTQGSITSIQAVYVPADDLTDPAPATTFAHLDATTVLSRNLAAKGIYPAVDPLDSTSTMLQPGIVSAEHYEVAENVKQTLQRYKELQDIIAILGIDELSEEDRLVVARARKVERFLSQPFFVAEIFT…	99.77	0	gi|691189915|gb|AIR75429.1|	ATP synthase CF1 beta subunit (chloroplast) [Cyclotella sp. L04_2]	96.96	0	sp|A0T0R6|ATPB_THAPS	ATP synthase subunit beta, chloroplastic OS=Thalassiosira pseudonana GN=atpB PE=3 SV=1	100	0	tr|A0A0F6SKW9|A0A0F6SKW9_CYCME	ATP synthase subunit beta (Fragment) OS=Cyclotella meneghiniana GN=atpB PE=3 SV=1	gi|22298068|ref|NP_681315.1|	709	0	COG0055	FoF1-type ATP synthase, beta subunit	C	Energy production and conversion	K02112|1|0.0|694|ccp:CHC_765| F-type H+-transporting ATPase subunit beta [EC:3.6.3.14]	GO:0042777//plasma membrane ATP synthesis coupled proton transport;GO:0015991//ATP hydrolysis coupled proton transport	GO:0008553//hydrogen-exporting ATPase activity, phosphorylative mechanism;GO:0046933//proton-transporting ATP synthase activity, rotational mechanism;GO:0005524//ATP binding;GO:0046961//proton-transporting ATPase activity, rotational mechanism	GO:0045261//proton-transporting ATP synthase complex, catalytic core F(1);GO:0009535//chloroplast thylakoid membrane;GO:0005886//plasma membrane
alpha		ADB27544.1	ATP synthase CF0 subunit II B' chain (chloroplast) [Thalassiosira oceanica CCMP1005]	17353.3	0.179	2	7	YP_004072590.1	0.335	7	0.002	-1.6	ADB27544.1	MINPSILISNSEVSGPGGLFDIGATLPLVAIQFILLMVLLNIILYSPLLTIIEERKEYILSHLAEASEKLAQAKELTTQYEQDLETARKEAQLEIANSQNIHKEILDIELDISQKYIDNLLETISSDLLNKKKTALDTLDSSVQALCTEVESKLSI	100	2e-106	gi|315320534|ref|YP_004072590.1|	ATP synthase CF0 subunit II B' chain [Thalassiosira oceanica CCMP1005]	92.31	4e-98	sp|A0T0P1|ATPX_THAPS	ATP synthase subunit b', chloroplastic OS=Thalassiosira pseudonana GN=atpG PE=3 SV=1	100	6e-105	tr|E7BWI6|E7BWI6_THAOC	ATP synthase subunit b', chloroplastic OS=Thalassiosira oceanica GN=atpG PE=3 SV=1	gi|113475843|ref|YP_721904.1|	108	5e-29	COG0711	FoF1-type ATP synthase, membrane subunit b or b'	C	Energy production and conversion	K02111|1|2e-17|82.0|gsl:Gasu_40630| F-type H+-transporting ATPase subunit alpha [EC:3.6.3.14]!K02109|2|6e-16|73.9|ppp:PHYPADRAFT_142087| F-type H+-transporting ATPase subunit b	GO:0030168//platelet activation;GO:0051258//protein polymerization;GO:0015986//ATP synthesis coupled proton transport;GO:0007165//signal transduction	GO:0005102//receptor binding;GO:0015078//hydrogen ion transmembrane transporter activity;GO:0030674//protein binding, bridging;GO:0005524//ATP binding	GO:0016021//integral component of membrane;GO:0005577//fibrinogen complex;GO:0045263//proton-transporting ATP synthase complex, coupling factor F(o);GO:0009535//chloroplast thylakoid membrane
alpha		AIR75402.1	ATP synthase CF1 alpha subunit (chloroplast) [Cyclotella sp. L04_2]	54324.4	0.217	5	14	AIR75543.1	0.477	14	0.002	-1.1	AIR75402.1	MINIRPDEISSIIREQIELYDQDVKIDNIGTVLQVGDGIARVYGLDQVMSGELLEFEDKTIGIALNLENDNVGVVLMGNGRQILEGGSVKCTGQIAQIPVGEGFLGRVVNPLGVPIDGKGDIISTETRLVESMAPGIISRKSVCEPLQTGITSIDAMIPIGRGQRELIIGDRQTGKTSIAVDTIINQKTENVVCVYVGIGQKASTVAQVVNLLDEKGAMPYTIIVSASANDPATLQYIAPYSGAALAEYFMYNGKATLIIYDDLTKQAMAYRQMSLLLRRPPGREAYPGDVFYLHSRLLERAAKLSDALGGGSMTALPIIETQASDVSAYIPTNVISITDGQIFLSNDLFNSGIRPAINVGISVSRVGSAAQTKAMKKVAGKLKLELAQFAELEAFSQF…	100	0	gi|691189888|gb|AIR75402.1|	ATP synthase CF1 alpha subunit (chloroplast) [Cyclotella sp. L04_2]	94.23	0	sp|A0T0P4|ATPA_THAPS	ATP synthase subunit alpha, chloroplastic OS=Thalassiosira pseudonana GN=atpA PE=3 SV=1	100	0	tr|A0A089VIE6|A0A089VIE6_9STRA	ATP synthase subunit alpha, chloroplastic OS=Cyclotella sp. L04_2 GN=atpA PE=3 SV=1	gi|434399698|ref|YP_007133702.1|	790	0	COG0056	FoF1-type ATP synthase, alpha subunit	C	Energy production and conversion	K02111|1|0.0|781|ccp:CHC_845| F-type H+-transporting ATPase subunit alpha [EC:3.6.3.14]	GO:0042777//plasma membrane ATP synthesis coupled proton transport;GO:0015991//ATP hydrolysis coupled proton transport	GO:0046933//proton-transporting ATP synthase activity, rotational mechanism;GO:0005524//ATP binding;GO:0046961//proton-transporting ATPase activity, rotational mechanism	GO:0045261//proton-transporting ATP synthase complex, catalytic core F(1);GO:0009535//chloroplast thylakoid membrane;GO:0005886//plasma membrane
alpha		YP_009093423.1	ATP synthase CF1 alpha subunit (chloroplast) [Thalassiosira weissflogii]	54149.3	0.262	3	17	AIR76096.1	0.537	16	0.002	-0.9	YP_009093423.1	MINIRPDEISSIIREQIEQYDQDVKVDNIGTVLQVGDGIARVYGLDQVMSGELLEFEDKTIGIALNLENDNVGVVLMGNGRQILEGGTVKSTGQIAQIPVGEAFLGRVVNPLGLPIDGKGEIATTESRLVESMAPGIISRKSVCEPLQTGITSIDAMIPIGRGQRELIIGDRQTGKTSIAVDTIINQKSENVVCVYVGIGQKASTIAQVVNVLEQKEAMSYTIIVSASANDPATLQYIAPYAGAALAEYFMYNGKATLIIYDDLTKQAMAYRQMSLLLRRPPGREAYPGDVFYLHSRLLERAAKLSDALGGGSMTALPIIETQASDVSAYIPTNVISITDGQIFLSNDLFNSGIRPAINVGISVSRVGSAAQTKAMKQVAGKLKLELAQFAELEAFSQF…	100	0	gi|700082625|ref|YP_009093423.1|	ATP synthase CF1 alpha subunit (chloroplast) [Thalassiosira weissflogii]	93.64	0	sp|A0T0P4|ATPA_THAPS	ATP synthase subunit alpha, chloroplastic OS=Thalassiosira pseudonana GN=atpA PE=3 SV=1	100	0	tr|A0A089VIM8|A0A089VIM8_THAWE	ATP synthase subunit alpha, chloroplastic OS=Thalassiosira weissflogii GN=atpA PE=3 SV=1	gi|434399698|ref|YP_007133702.1|	798	0	COG0056	FoF1-type ATP synthase, alpha subunit	C	Energy production and conversion	K02111|1|0.0|763|ccp:CHC_845| F-type H+-transporting ATPase subunit alpha [EC:3.6.3.14]	GO:0042777//plasma membrane ATP synthesis coupled proton transport;GO:0015991//ATP hydrolysis coupled proton transport	GO:0046933//proton-transporting ATP synthase activity, rotational mechanism;GO:0005524//ATP binding;GO:0046961//proton-transporting ATPase activity, rotational mechanism	GO:0045261//proton-transporting ATP synthase complex, catalytic core F(1);GO:0009535//chloroplast thylakoid membrane;GO:0005886//plasma membrane
gamma		XP_002289138.1	ATP synthase [Thalassiosira pseudonana CCMP1335]	40062.7	0.109	2	10	EED92675.1	0.476	10	0.008	1.1	XP_002289138.1	MKFLVVAVSALATASAFTTSPASFTTVSSPSVNNVFGQEGNAHRNRRATIVMDGKANAIRDRITSVNNTKKITSAMKLVAAAKVRRAQDSVLATRPFSETLQSVFGGLINRLGGEAADLPLLTQREVNKVTITVITGDRGLCGGYNSFMIKKAEARYKELTAQGIECDFILIGKKGASYFARREYPIRKVFDCGQNPNSKEALAISEEIINSFLSGETDAVELLYTKFVSLIASSPSVRTLVPFSASEISQKGDEVFQLTSQDGDFGVERKELEVAEPQDFPNDMIFEQDPLQIVNSILPLYLNGQILRTLQESVASELAARMQSMQSASDNAKALAKRLSQEYNRARQAAVTQEILEIVSGATALE	100	0	gi|223998931|ref|XP_002289138.1|	ATP synthase [Thalassiosira pseudonana CCMP1335]	84.23	0	sp|Q06908|ATPG_ODOSI	ATP synthase gamma chain, chloroplastic OS=Odontella sinensis GN=ATPC PE=1 SV=1	100	0	tr|B8C0W4|B8C0W4_THAPS	ATP synthase OS=Thalassiosira pseudonana GN=THAPSDRAFT_40156 PE=3 SV=1	gi|428769152|ref|YP_007160942.1|	355	1e-120	COG0224	FoF1-type ATP synthase, gamma subunit	C	Energy production and conversion	K02115|1|1e-139|402|ccp:CHC_T00008719001| F-type H+-transporting ATPase subunit gamma	GO:0042777//plasma membrane ATP synthesis coupled proton transport	GO:0046933//proton-transporting ATP synthase activity, rotational mechanism;GO:0005524//ATP binding;GO:0046961//proton-transporting ATPase activity, rotational mechanism	GO:0045261//proton-transporting ATP synthase complex, catalytic core F(1);GO:0009535//chloroplast thylakoid membrane;GO:0005886//plasma membrane
atpF		ABK20727.1	ATP synthase CF0 B chain subunit I (chloroplast) [Thalassiosira pseudonana]	19998	0.229	4	12	YP_874504.1;sp|A0T0P2.1|ATPF_THAPS;EED86188.1;XP_002297548.1	0.302	12	0.003	-1.7	ABK20727.1	MENFNQIFTVLAASEGIGLNLDILETGLLNILALVAILVYTGKDFLGSILQERKSTIVKSVQDAEDRLNEANRRLSEAQKQLSQAHVVISEIRNETKTAKTNLLKSDATTAKKELTTRFNRAISSFRSKERVIFLDVKQQIISLVLKRSAIQAKETFGSKKRARALINETIQKLEGDLL	100	3e-113	gi|118411110|ref|YP_874504.1|	ATP synthase CF0 B chain subunit I [Thalassiosira pseudonana]	100	6e-114	sp|A0T0P2|ATPF_THAPS	ATP synthase subunit b, chloroplastic OS=Thalassiosira pseudonana GN=atpF PE=3 SV=1	100	8e-112	tr|B8LER3|B8LER3_THAPS	Plastid thylakoid ATPase subunit, plastid protein OS=Thalassiosira pseudonana GN=atpF PE=3 SV=1	gi|428202063|ref|YP_007080652.1|	88.2	1e-20	COG0711	FoF1-type ATP synthase, membrane subunit b or b'	C	Energy production and conversion	K02111|1|1e-11|65.9|gsl:Gasu_40630| F-type H+-transporting ATPase subunit alpha [EC:3.6.3.14]!K02109|2|6e-09|56.2|ppp:PhpapaCp054| F-type H+-transporting ATPase subunit b	GO:0042777//plasma membrane ATP synthesis coupled proton transport	GO:0046933//proton-transporting ATP synthase activity, rotational mechanism;GO:0005524//ATP binding	GO:0016021//integral component of membrane;GO:0045263//proton-transporting ATP synthase complex, coupling factor F(o);GO:0009535//chloroplast thylakoid membrane;GO:0005886//plasma membrane
	Lcha1
		EJK56644.1	hypothetical protein THAOC_23429 [Thalassiosira oceanica]	26401.2	0.033	2	3	-	0.236	3	0.008	-2.1	EJK56644.1	MKLALIASLAGSAAAFTSAPVKSSSALYMSETPTAVEETVEETVVAIEEEIVVVEEPKYMTINGWTADENKPLYGLPGAIAPLGFFDPLGFSKDVELTGAKRLREAEIMHGRVAMMATVGYLIGESTPTITYGMDVHHTIANNQIPEVPGTVLFPFFLAINISEALRASRGWVEPGMGPVFTLRENYYPGDIGFDPLGLKPNDAEGFVNMQNREISNGRLAMFAAAGMCVQEQINGKGILENLGF	100	2e-141	gi|397595979|gb|EJK56644.1|	hypothetical protein THAOC_23429 [Thalassiosira oceanica]	45.18	3e-36	sp|Q39709|FCP_ISOGA	Fucoxanthin-chlorophyll a-c binding protein, chloroplastic OS=Isochrysis galbana GN=FCP PE=1 SV=1	100	5e-140	tr|K0RW58|K0RW58_THAOC	Uncharacterized protein OS=Thalassiosira oceanica GN=THAOC_23429 PE=4 SV=1	-	-	-	-	-	-	-	K08907|1|3e-34|126|cre:CHLREDRAFT_184730| !K08908|2|4e-16|79.0|thj:104808113|	GO:0009765//photosynthesis, light harvesting		GO:0016020//membrane;GO:0009507//chloroplast
		CAI44219.1	fucoxanthin chlorophyll a/c binding protein, partial [Cyclotella cryptica]	3421.61	0.312	1	3	CAA06733.1;XP_002290650.1;EED92402.1	0.251	3	0.004	-2.3	CAI44219.1	MSRSIPFLTVPEKLDGSMPGDMGFDPMGLSDI	100	6e-15	gi|84871814|emb|CAI44219.1|	fucoxanthin chlorophyll a/c binding protein [Cyclotella cryptica]	-	-	-	-	100	2e-13	tr|Q2PC10|Q2PC10_9STRA	Fucoxanthin chlorophyll a/c binding protein (Fragment) OS=Cyclotella cryptica GN=fcp4 PE=4 SV=1	-	-	-	-	-	-	-	K08907|1|4e-09|51.6|ccp:CHC_T00008505001|	-	-	-
		EED87487.1	fucoxanthin chlorophyll a/c protein, LI818 clade [Thalassiosira pseudonana CCMP1335]	27465.7	0.043	1	2	XP_002295183.1	0.329	2	0.04	-1.6	EED87487.1	MKFTLLSSAIVATSAFVAPSPSTIASTALFSTEESTEQDIITPVSPSVAAINGWTPNETQNCFGLPGSVAPTGYFDPLGFAQDGITLNEIKRNREAEVMHGRVAMLATLGYFAGEALPSPFGITGPANDQLQQVPLPAFLLLTAGIASAELKRANIGWVEPDFGNWTKTLWKLRDNYYPGDVGFDPLGLKPTDAKAFADMQTRELQNGRLAMIGAIGMISQELVNHRTIMGTIDFYNKVYSGVNPYEGCGDGVIC	100	0	gi|224013062|ref|XP_002295183.1|	fucoxanthin chlorophyll a/c protein, LI818 clade [Thalassiosira pseudonana CCMP1335]	47.65	3e-38	sp|Q39709|FCP_ISOGA	Fucoxanthin-chlorophyll a-c binding protein, chloroplastic OS=Isochrysis galbana GN=FCP PE=1 SV=1	100	0	tr|B8CGG1|B8CGG1_THAPS	Fucoxanthin chlorophyll a/c protein, LI818 clade OS=Thalassiosira pseudonana GN=Lhcx6 PE=4 SV=1	-	-	-	-	-	-	-	K08907|1|7e-35|129|cre:CHLREDRAFT_184730| !K08910|4|4e-14|72.8|cme:CYME_CMQ142C|	GO:0009765//photosynthesis, light harvesting		GO:0016020//membrane;GO:0009507//chloroplast
		EJK46744.1	hypothetical protein THAOC_34573 [Thalassiosira oceanica]	26715.3	0.036	3	10	EED94820.1;XP_002287377.1	0.357	10	0.006	-1.5	EJK46744.1	MKLAIAALTAATASAFAPAQTDRSSTALNVQWTEGTKALPFGSSPDTLDGSLPGDVGFDPIGFSTQPFASFNNPLYVEGNFMSDLEWLREAELAHGRIAQLAVVGFLWPGLFGTLPGAEGYADFSELNPFKALSTVPESAIYQIIGGCAWFEYQRVVRIKEQGANRVVGDIGIGYPGAFNPLNLNYTPEEFAEKQLQEIKHCRLAMIAAFGLICQANNSGTDVISQLAPAFEAPEYAAKAGYFLPQGI	100	2e-168	gi|397569437|gb|EJK46744.1|	hypothetical protein THAOC_34573 [Thalassiosira oceanica]	31.75	8e-15	sp|P04778|CB1C_ARATH	Chlorophyll a-b binding protein 1, chloroplastic OS=Arabidopsis thaliana GN=LHCB1.3 PE=1 SV=1	100	6e-167	tr|K0R4S5|K0R4S5_THAOC	Uncharacterized protein OS=Thalassiosira oceanica GN=THAOC_34573 PE=4 SV=1	-	-	-	-	-	-	-	K08907|1|1e-26|106|ccp:CHC_T00008505001|	GO:0009765//photosynthesis, light harvesting		GO:0016020//membrane;GO:0009507//chloroplast
		EJK58980.1	hypothetical protein THAOC_20854 [Thalassiosira oceanica]	21797.9	0.069	1	17	-	0.346	17	0.002	-1.5	EJK58980.1	MMKSIAALALVGSAAAFAPAPVQQKSTALYENPLANELGAQAPLGFFDPLGACADGDKENFDRLRWVELKHGRISMLAVVGYLVTYAGVRFPGAEDIPSGFAAIDATPGMVWAQFAATTAMMEAANQDQFKGPWGTNQNSLGESPAEFKGDFRNGALDFGWDKLSPEAKMRKRAIELNNGRAAQMGILGLMVHEKLGNIDAILP	100	2e-126	gi|397605353|gb|EJK58980.1|	hypothetical protein THAOC_20854 [Thalassiosira oceanica]	54.35	8e-58	sp|Q41093|FCPE_PHATR	Fucoxanthin-chlorophyll a-c binding protein E, chloroplastic OS=Phaeodactylum tricornutum GN=FCPE PE=2 SV=1	100	4e-125	tr|K0S0X3|K0S0X3_THAOC	Uncharacterized protein OS=Thalassiosira oceanica GN=THAOC_20854 PE=4 SV=1	-	-	-	-	-	-	-	K08907|1|5e-11|63.2|gsl:Gasu_15240|			GO:0016020//membrane;GO:0044424//intracellular part
		AAB70098.1	fucoxanthin-chlorophyll a/c light-harvesting protein, partial [Skeletonema costatum]	20722.5	0.111	2	8	-	0.378	8	0.002	-2.9	AAB70098.1	MKSVIFAAAIASAAAFAPAQVGKTTTSLNAFESELGAQAPLGFWDPLGFLDRADQETFDRLRYVELKHGRVSQLAFVGNLITRAGYHLPGNITPDSTFDSYPNGLAAINGADAIPTLRLIQTLAFIGFLELKVITDVTGDSQFAGDFRNGFDFGWDKQSPEWQEQKRAVELNQGRAAMMGILELMVHEQL	100	1e-124	gi|1778719|gb|AAB70098.1|	fucoxanthin-chlorophyll a/c light-harvesting protein, partial [Skeletonema costatum]	64.94	2e-73	sp|Q42395|FCP_ODOSI	Fucoxanthin-chlorophyll a-c binding protein, chloroplastic OS=Odontella sinensis GN=FCPA PE=2 SV=1	100	3e-123	tr|P93855|P93855_SKECO	Fucoxanthin-chlorophyll a/c light-harvesting protein (Fragment) OS=Skeletonema costatum GN=scfcpB PE=2 SV=1	-	-	-	-	-	-	-	K08907|1|4e-11|63.2|gsl:Gasu_15240|	GO:0044237//cellular metabolic process		GO:0043234//protein complex;GO:0034357//photosynthetic membrane;GO:0009507//chloroplast;GO:0044425//membrane part
		CAA04403.1	fucoxanthin chlorophyll a/c binding protein, partial [Cyclotella cryptica]	20937.6	0.131	2	13	XP_002295184.1;EED87488.1;XP_002295258.1;EED87562.1;CAA04406.1;CAA04404.1;CAA04402.1;CAA04405.1;CAA04407.1	0.393	12	0.002	-2.4	CAA04403.1	GSAVAFAPAATRASSSGLNAFSAADLPGALPPVGFFDPLGFAEKADEKTLKRYREAEVTHGRVAMLAVIGFLVGEAVEGSSFLFDAQISGPAITHFTQVPDGWDALIVTFIGAAEAQRAQIGWVDPADASYDQPGLLRDNYYPGDIGFDPLGLKPEDPEELNIMITKELQNGRLAMLAAAGFLAQEAVDGKGILEHFSS	100	6e-142	gi|2996375|emb|CAA04403.1|	fucoxanthin chlorophyll a/c binding protein, partial [Cyclotella cryptica]	48.35	2e-45	sp|Q03965|L181_CHLMO	Chlorophyll a-b binding protein L1818, chloroplastic OS=Chlamydomonas moewusii GN=L1818 PE=2 SV=1	100	2e-140	tr|O65891|O65891_9STRA	Fucoxanthin chlorophyll a/c binding protein (Fragment) OS=Cyclotella cryptica GN=fcp07 PE=2 SV=1	-	-	-	-	-	-	-	K08907|1|2e-55|179|cre:CHLREDRAFT_184730| !K08908|3|2e-19|86.7|cit:102607051|	GO:0009765//photosynthesis, light harvesting		GO:0016020//membrane;GO:0009507//chloroplast
		CAA04226.1	fucoxanthin chlorophyll a /c protein, partial [Cyclotella cryptica]	20393.4	0.131	1	9	CAA04400.1;CAA04178.1	0.432	9	0.027	-0.2	CAA04226.1	LIASAAAFAPAQTGKATTSLAAFENELGAQPPLGFFDPLGLLDGADQERFDRLRYVELKHGRICQLAFLGQITTRAGFRLPGDISYDGTKFSDIGEGWAGSLQVPVAGALQILAFVGFLELAVMKDVTGEGEFVGDFRNGALDFGWDTFDEETKLSKRAIELNNGRAAMMGILGLMVHEQLGGSVPIVGEL	98.95	1e-120	gi|2996369|emb|CAA04400.1|	fucoxanthin chlorophyll a/c binding protein [Cyclotella cryptica]	77.17	4e-85	sp|Q42395|FCP_ODOSI	Fucoxanthin-chlorophyll a-c binding protein, chloroplastic OS=Odontella sinensis GN=FCPA PE=2 SV=1	98.95	3e-119	tr|O65889|O65889_9STRA	Fucoxanthin chlorophyll a/c binding protein OS=Cyclotella cryptica GN=fcp03 PE=2 SV=1	-	-	-	-	-	-	-	K08907|1|3e-12|65.9|gsl:Gasu_15240|	GO:0044237//cellular metabolic process		GO:0043234//protein complex;GO:0034357//photosynthetic membrane;GO:0009507//chloroplast;GO:0044425//membrane part
	Lcha4	EED95211.1	fucoxanthin chlorophyll a/c protein [Thalassiosira pseudonana CCMP1335]	27423.7	0.031	4	10	XP_002287768.1;EJK77608.1	0.421	8	0.002	0.9	EED95211.1	MKSVAASLLLASTCAAFAPSNNGAAVKTSLDAMPDRMWNKMVDKTQRSASMPFLPRPINLDGSYVGDVGFDPFYLSSIDKNFAGFIQPPSWEETNGLPTLYWMREAELKHGRVAMLAWTGWLATDGALGPVPLRFPGAAYQAVPNSLSAHDIMVDQGSLGFMLVAIGIIEVCCATVLVEVSKGESDRAAGDFKLDPLQFLKGKSDADINTMKLKELQNGRAAMMAFAGVVTQAALGGTDFPYLVPYPNVADVTW	100	6e-176	gi|223996189|ref|XP_002287768.1|	fucoxanthin chlorophyll a/c protein [Thalassiosira pseudonana CCMP1335]	32.65	7e-13	sp|Q9SDM1|CB121_HORVU	Chlorophyll a-b binding protein 1B-21, chloroplastic OS=Hordeum vulgare GN=LHC Ib-21 PE=1 SV=1	100	2e-174	tr|B8BU32|B8BU32_THAPS	Fucoxanthin chlorophyll a/c protein OS=Thalassiosira pseudonana GN=Lhcr12 PE=4 SV=1	-	-	-	-	-	-	-	K08907|1|2e-21|93.2|gsl:Gasu_11610|	GO:0009765//photosynthesis, light harvesting		GO:0016020//membrane;GO:0009507//chloroplast
		EJK45846.1	hypothetical protein THAOC_35518 [Thalassiosira oceanica]	22879.2	0.061	3	8	XP_002290280.1;EED92032.1	0.604	7	0.008	0.3	EJK45846.1	MKSVIAAALIGSCAAFAPAQTGKASTALDLYGMQEPSFNPEFRGDVFDPMGFGKMHEIEGAFPNMFPHTQFLEEAEIKHGRMAMLAWTGVWTTEGLGWHFPGAPEADDWTTGLGVWAREDPGSFGAILAFIAIAEGEGVSHAGDNFRGVSKKIPGDMGFDWMGLSKKLPEERVARYKTVEKKNGRAAMIAMASLFAMKAIPGSVPFMALYGN	100	8e-155	gi|397567901|gb|EJK45846.1|	hypothetical protein THAOC_35518 [Thalassiosira oceanica]	28.92	2e-06	sp|Q42395|FCP_ODOSI	Fucoxanthin-chlorophyll a-c binding protein, chloroplastic OS=Odontella sinensis GN=FCPA PE=2 SV=1	100	2e-153	tr|K0RA37|K0RA37_THAOC	Uncharacterized protein OS=Thalassiosira oceanica GN=THAOC_35518 PE=4 SV=1	-	-	-	-	-	-	-	K08907|1|2e-15|75.1|ccp:CHC_T00008505001|	-	-	-
		EED87487.1	fucoxanthin chlorophyll a/c protein, LI818 clade [Thalassiosira pseudonana CCMP1335]	27465.7	0.043	1	2	XP_002295183.1	0.329	2	0.04	-1.6	EED87487.1	MKFTLLSSAIVATSAFVAPSPSTIASTALFSTEESTEQDIITPVSPSVAAINGWTPNETQNCFGLPGSVAPTGYFDPLGFAQDGITLNEIKRNREAEVMHGRVAMLATLGYFAGEALPSPFGITGPANDQLQQVPLPAFLLLTAGIASAELKRANIGWVEPDFGNWTKTLWKLRDNYYPGDVGFDPLGLKPTDAKAFADMQTRELQNGRLAMIGAIGMISQELVNHRTIMGTIDFYNKVYSGVNPYEGCGDGVIC	100	0	gi|224013062|ref|XP_002295183.1|	fucoxanthin chlorophyll a/c protein, LI818 clade [Thalassiosira pseudonana CCMP1335]	47.65	3e-38	sp|Q39709|FCP_ISOGA	Fucoxanthin-chlorophyll a-c binding protein, chloroplastic OS=Isochrysis galbana GN=FCP PE=1 SV=1	100	0	tr|B8CGG1|B8CGG1_THAPS	Fucoxanthin chlorophyll a/c protein, LI818 clade OS=Thalassiosira pseudonana GN=Lhcx6 PE=4 SV=1	-	-	-	-	-	-	-	K08907|1|7e-35|129|cre:CHLREDRAFT_184730| !K08910|4|4e-14|72.8|cme:CYME_CMQ142C|	GO:0009765//photosynthesis, light harvesting		GO:0016020//membrane;GO:0009507//chloroplast
		EED87666.1	predicted protein [Thalassiosira pseudonana CCMP1335]	26043.1	0.075	2	11	XP_002294886.1	0.596	11	0.012	-0.7	EED87666.1	MKLSLLSVLIGSAVGFTATSSARTSVSTKAAIDDLKSIAEKSNPVLKFYDPLELSSTTIWDNTNDQTIAFLRHSEIKHGRVAMAAFVGYIVQSNGIHFPWPMSFDGTPFPYAAGSPPEQWDALSDEAKWQIILFIGFLEWFSEATGTHYMRGGVPGAYPKFSDSDVIPHPVPLNLFDPFGFSEGKSAEAKANGLIKELNNGRLAMIGIMGFISEQRVEGSVPLLKGLVAHYDGETMAPFA	100	4e-165	gi|224012467|ref|XP_002294886.1|	predicted protein [Thalassiosira pseudonana CCMP1335]	32.11	5e-17	sp|Q42395|FCP_ODOSI	Fucoxanthin-chlorophyll a-c binding protein, chloroplastic OS=Odontella sinensis GN=FCPA PE=2 SV=1	100	1e-163	tr|B8CFP9|B8CFP9_THAPS	Uncharacterized protein OS=Thalassiosira pseudonana GN=THAPSDRAFT_270092 PE=4 SV=1	-	-	-	-	-	-	-	K08907|1|1e-12|68.2|gsl:Gasu_15240| !K08910|5|4e-10|62.0|cre:CHLREDRAFT_186299|	-	-	-

## Sheet: Carbon 
Title :	Comparative proteomic analysis reveals specific metabolic regulations of the diatom Skeletonema dohrnii to the temperature and silicate stress
Authors :	Satheeswaran Thangaraj, Mario Giordano and Jun Sun*
Table S3	Regulation of carbon metabolic proteins in lower silicate cells
S. No	Protein_ID	Description	Mass	Protein_Coverage	Uniq_Pep_Num	Uniq_Spec_Num	Sameset	Ratio_Control-VS-Low silicate	Quant_Num_Control-VS-Low silicate	Qvalue_Control-VS-Low silicate	Fold change	Protein_ID	Protein_Seqence	NCBInr Identity	NCBInr E-value	NCBInr Accession	NCBInr Description	Swissprot Identity	Swissprot E-value	Swissprot Accession	Swissprot Description	Tremble Identity	Tremble E-value	Tremble Accession	Tremble Description	Protein_or_Domain	COG Score	COG E-value	COG ID	COG Function-Description	COG Code	COG Function-Categories	KEGG(ko_id|rank|evalue|score|identity|ko_definition)	GO Biological_Process	GO Molecular_Function	GO Cellular_Component
1	XP_002287200.1	transketolase [Thalassiosira pseudonana CCMP1335]	72043.2	0.139	6	47	EED94643.1	1.522	47	0.005	-0.6	XP_002287200.1	MAALATAANEARGLAMDSIAAAHSGHMGLPLGCAEIGSILYGSQMQYNPKDTQWINRDRFILSAGHGSMFLYSWLNLAGFDLPMEEVKNFRQHHSMTPGHPEFPNSEHNTPGIECTTGPLGAGVSNAVGFAVSEKMAAARYNTDEHTIFDHHIYALAGDGCFQEGVSAEAAQFAAHEKLDNLIVLYDSNEVTLDKMAEYTQSEDIIKRYEAYGWETYEIDGHDLAVVEETIAAAKASNNGKPKFIKCNTIIGKGMEETEGTNAAHGEAGVPYVDKARASIGLPEEKWFVSEGTRDFFKGVQEKNTKTYDEWQATYAAWKEANPALATELENAVADVTPSAEEMLASIPEMGDAAEATRVSGFKVIQEIAKQVPQYISGSADLHGSTRNYINDGGNFGAG…	100	0	gi|223995033|ref|XP_002287200.1|	transketolase [Thalassiosira pseudonana CCMP1335]	57.34	0	sp|Q556J0|TKT_DICDI	Transketolase OS=Dictyostelium discoideum GN=tkt-1 PE=1 SV=1	100	0	tr|B8BTR4|B8BTR4_THAPS	Transketolase OS=Thalassiosira pseudonana GN=TKT2 PE=3 SV=1	gi|294056470|ref|YP_003550128.1|	813	0	COG0021	Transketolase	G	Carbohydrate transport and metabolism	K00615|1|8e-167|499|mus:103998561| transketolase [EC:2.2.1.1]	GO:0008152//metabolic process	GO:0004802//transketolase activity	-
2	AJO54223.1	ribulose-1,5-bisphosphate carboxylase/oxygenase large subunit, partial (chloroplast) [Cyclotella meneghiniana]	46878.6	0.24	3	7	-	2.432	10	0.012	-1.3	AJO54223.1	SDRYESGVIPYAKMGYWDAAYTVKDTDVLALFRITPQPGVDPVEAAAAVAGESSTATWTVVWTDLLTACERYRAKAYRVDPVPNATDQYFAFIAYECDLFEESSLSNLTASIIGNVFGFKAVAALRLEDMRIPHSYLKTFQGPATGIVVERERLNKYGTPLLGATVKPKLGLSGKNYGRVVYEGLKGGLDFLKDDENINSQPFMRWRERFLNCLEGINRASAATGEVKGSYLNVTAATMEEVYKRAEYAKMIGSVIIMIDLVMGYTAIQSIAYWAREDDMILHLHRAGNSTYARQKNHGINFRVICKWMRMAGVDHIHAGTVVGKLEGDPLMIKGFYDVLRLTELEVNLPYGIFFEMDWASLRRCMPVASGGIHCGQMHQLIHYLGDDVVLQFGGGTIG…	99.76	0	gi|98990535|gb|ABF60335.1|	ribulose-1,5-bisphosphate carboxylase/oxygenase large subunit, partial (chloroplast) [Cyclotella meneghiniana]	97.39	0	sp|A0T0N6|RBL_THAPS	Ribulose bisphosphate carboxylase large chain OS=Thalassiosira pseudonana GN=rbcL PE=3 SV=1	100	0	tr|A0A0R6BB14|A0A0R6BB14_CYCME	Ribulose bisphosphate carboxylase large chain (Fragment) OS=Cyclotella meneghiniana GN=rbcL PE=3 SV=1	gi|292493417|ref|YP_003528856.1|	706	0	COG1850	Ribulose 1,5-bisphosphate carboxylase, large subunit, or a RuBisCO-like protein	G	Carbohydrate transport and metabolism	K01601|1|0.0|733|cme:CymeCp013| ribulose-bisphosphate carboxylase large chain [EC:4.1.1.39]	GO:0019253//reductive pentose-phosphate cycle;GO:0009853//photorespiration;GO:0055114//oxidation-reduction process	GO:0016984//ribulose-bisphosphate carboxylase activity;GO:0004497//monooxygenase activity;GO:0000287//magnesium ion binding	GO:0009507//chloroplast
3	EJK66959.1	class II fructose-bisphosphate aldolase [Thalassiosira oceanica]	48489	0.074	4	4	-	1.759	7	0.045	1.4	EJK66959.1	MKLFGLALLLCGGVSGFTSVKGRAQNARTILRGGVSSDLGTPCEEECALESFPNMPESVHPGVLTGQAQVDLLNHAKENGESSSPGEHAATPFLLSIASRHLASNACLEAARRNDAPIIIQFSSGGSQFYGGKGLDNKNYAAAIAGAVSGAFHVRTMAEQYGVPVILHTDHCAKKLLPWIDGLLAASERYYEKHGEPLFSSHMIDLSEEPIEENIDICKDYLSRFSKIGMLLEMELGITGGEEDGVNNEDVPLEDLYSKPEEIYQVYDALTPISDQFTVAAAFGNVHGVYSPGNVKLEPKILTRAQAYISEKLGGSAPSDGKPVKFVFHGGSGSDVSDIQEAIGYGVIKMNIDTDTQWSYWEGIKNFESKYHDYLQGQIGNPEGPTKPNKKYYDPRECM…	100	0	gi|397623324|gb|EJK66959.1|	class II fructose-bisphosphate aldolase [Thalassiosira oceanica]	56.01	6e-125	sp|P44429|ALF_HAEIN	Fructose-bisphosphate aldolase OS=Haemophilus influenzae (strain ATCC 51907 / DSM 11121 / KW20 / Rd) GN=fba PE=3 SV=1	100	0	tr|K0SPN2|K0SPN2_THAOC	Class II fructose-bisphosphate aldolase OS=Thalassiosira oceanica GN=THAOC_12069 PE=4 SV=1	gi|319957102|ref|YP_004168365.1|	435	4e-150	COG0191	Fructose/tagatose bisphosphate aldolase	G	Carbohydrate transport and metabolism	K01624|1|5e-139|405|olu:OSTLU_94831| fructose-bisphosphate aldolase, class II [EC:4.1.2.13]	GO:0006096//glycolytic process	GO:0004332//fructose-bisphosphate aldolase activity;GO:0008270//zinc ion binding	-
4	EJK69871.1	hypothetical protein THAOC_08831 [Thalassiosira oceanica]	20838.3	0.267	3	13	-	2.547	13	0.002	-1.3	EJK69871.1	MEERGHSLESIMASIEARKPDFDAYIEPQKAFADYVIEVLPTDLDKEDKKTLKVRAIQKKGVADFNPTYLFDEGSEVSWTPSADKLSSPAPGMKLSYTQEEYFGNDVSVLEMDGSFDNIQELVYVESNLGNANSKFYGEITQAMLSLADSPGSNNGTGLMQTLAAFAIRELYNKKAASAKLAASKEAVATA	100	7e-115	gi|397630689|gb|EJK69871.1|	hypothetical protein THAOC_08831 [Thalassiosira oceanica]	61.49	1e-68	sp|P26302|KPPR_WHEAT	Phosphoribulokinase, chloroplastic OS=Triticum aestivum PE=2 SV=1	100	2e-113	tr|K0T8Z3|K0T8Z3_THAOC	Uncharacterized protein OS=Thalassiosira oceanica GN=THAOC_08831 PE=4 SV=1	gi|428769812|ref|YP_007161602.1|	221	1e-70	COG0572	Uridine kinase	F	Nucleotide transport and metabolism	K00855|1|2e-71|224|sot:102591470| phosphoribulokinase [EC:2.7.1.19]	GO:0005975//carbohydrate metabolic process;GO:0016310//phosphorylation;GO:0006950//response to stress	GO:0005524//ATP binding;GO:0008974//phosphoribulokinase activity	GO:0009526//plastid envelope;GO:0009579//thylakoid;GO:0016020//membrane;GO:0044434//chloroplast part
5	EED94748.1	predicted protein [Thalassiosira pseudonana CCMP1335]	29407	0.174	4	16	XP_002287305.1	1.571	14	0.002	-0.7	EED94748.1	MKFIAAAFAAVATQNVAAFAPMTQRSRVSTSIRMALSQDELKKMVGYKSVDDYVKSGMVVGLGTGSTAYFAVERLGEKLKSGELKDIVAIPTSVRTKEQAEELGIPLVTLDTHSKLDVAIDGADEVDPDLNLVKGGGGALLREKMVEVCADKFIVIVDESKLCDGLGPGFPLPVEITPFCHIHTLNTIAALPSCAGCKAVLRMGSSSTNKPDGDEIAVTDNGNYIVDLHFTEPIKDAPTMAKELKNTVGVVDHGLFCGMTTAVIIAGSDGISVKEA	100	0	gi|223995243|ref|XP_002287305.1|	predicted protein [Thalassiosira pseudonana CCMP1335]	56.69	9e-87	sp|Q9S726|RPI3_ARATH	Probable ribose-5-phosphate isomerase 3, chloroplastic OS=Arabidopsis thaliana GN=RPI3 PE=1 SV=1	100	0	tr|B8BUF2|B8BUF2_THAPS	Uncharacterized protein OS=Thalassiosira pseudonana GN=THAPSDRAFT_270308 PE=3 SV=1	gi|218780813|ref|YP_002432131.1|	209	7e-66	COG0120	Ribose 5-phosphate isomerase	G	Carbohydrate transport and metabolism	K01807|1|6e-143|406|bpg:Bathy03g04860| ribose 5-phosphate isomerase A [EC:5.3.1.6]	GO:0009052//pentose-phosphate shunt, non-oxidative branch	GO:0004751//ribose-5-phosphate isomerase activity	-
6	pdb|3BOJ|A	Chain A, Carbonic Anhydrase From Marine Diatom Thalassiosira Weissflo Cadmium Bound Domain 1 Without Bound Metal (Cdca1-R1)	23179.6	0.047	2	2	pdb|3BOH|A;pdb|3BOH|B;AAX08632.1	0.8	12	0.203	-0.8	pdb|3BOJ|A	SHMSLTPDQIVAALQERGWQAEIVTEFSLLNEMVDVDPQGILKCVDGRGSDNTQFCGPKMPGGIYAIAHNRGVTTLEGLKQITKEVASKGHVPSVHGDHSSDMLGCGFFKLWVTGRFDDMGYPRPQFDADQGAKAVENAGGVIEMHHGSHAEKVVYINLVENKTLEPDEDDQRFIVDGWAAGKFGLDVPKFLIAAAATVEMLGGPKKAKIVIP	100	2e-158	gi|166007358|pdb|3BOH|A	Chain A, Carbonic Anhydrase From Marine Diatom Thalassiosira Weissflo Cadmium Bound Domain 1 With Acetate (Cdca1-R1)	-	-	-	-	100	4e-138	tr|Q50EL4|Q50EL4_THAWE	Cadmium-specific carbonic anhydrase (Fragment) OS=Thalassiosira weissflogii GN=cdca1 PE=1 SV=1	-	-	-	-	-	-	-	-		GO:0046872//metal ion binding	-
7	EED92490.1	pyruvate phosphate dikinase [Thalassiosira pseudonana CCMP1335]	103173	0.025	2	2	XP_002290738.1	1.83	4	0.159	-0.4	EED92490.1	MVINSQYIYPFGGSAPKPTVDPDKQIVGGKGLGLQVMFKIGVDVPPGFTLTTPLCQVYAKQNDLPADVWKGVRENVRRIEIDMEKEFGSNENPLLFSCRSGAAMSMPGMMDTVLNIGLNDITVDGLAKATGNDRFAWDSYRRLLDMFGEVVLGISHEDFEKRFDKVKEAANAKSDVDLGVEDLKKLCDEYKQVYLEEGKVFPMDPYEQLYACVKAVFGSWMTPRAVKYREINNIKNLIGTATNIQTMVFGNMGDDSGTGVAFSRNPSTGENLMYGEYLINAQGEDVVAGIRTPQPISQMQEVLPDAYAKFLENVDKLEHYFKDMQDVEFTVEKGQLWMLQCRNGKRTGVAAIRIATELVEEGICTKSEALLKVEPRHVEQLLHPTFSPEALKSVAYTEG…	100	0	gi|224002132|ref|XP_002290738.1|	pyruvate phosphate dikinase [Thalassiosira pseudonana CCMP1335]	53.42	0	sp|Q42910|PPDK_MESCR	Pyruvate, phosphate dikinase, chloroplastic OS=Mesembryanthemum crystallinum GN=PPD PE=2 SV=1	100	0	tr|B8C332|B8C332_THAPS	Pyruvate, phosphate dikinase OS=Thalassiosira pseudonana GN=PDK1_2 PE=3 SV=1	gi|268316505|ref|YP_003290224.1|	922	0	COG1080	Phosphoenolpyruvate-protein kinase (PTS system EI component in bacteria)	G	Carbohydrate transport and metabolism	K01006|1|0.0|930|gra:105777958| pyruvate, orthophosphate dikinase [EC:2.7.9.1]	GO:0016310//phosphorylation	GO:0050242//pyruvate, phosphate dikinase activity;GO:0016301//kinase activity;GO:0005524//ATP binding	-
8	XP_002288820.1	predicted protein [Thalassiosira pseudonana CCMP1335]	37417.3	0.136	3	19	EED94256.1;EJK72926.1	1.271	19	0.011	0.3	XP_002288820.1	MSEQYDVDAPTLSRYVMQNTKDHELTILLNTLATSFKLISSAVGRAGVAQLYGLAGEVNSTGDDQKKLDVMSNDMMINALVNSGVCCVLVSEENEEPIVVPADKAGKFCVAFDPLDGSSNIDCNVSVGTIFSVYEKKDGNVNDLLRSGADCLCAGYCCYSSATELVFTFQGGTVEGFCLDPTIGEFVHTRINMRFPEDGGKRIYSCNEGNFVHWDQPIKDAVEAFKSSEKPYSARYVGSMVADIHRTLLYGGIYIYPADKKSPKGKLRCLYEGIPMALIIEQAGGIASTGLFEGKIGRVVELTPDAIHCKCPIIMGGPRDVGVVYDCYKKHGVETPSL	100	0	gi|223998294|ref|XP_002288820.1|	predicted protein [Thalassiosira pseudonana CCMP1335]	48.82	1e-104	sp|P00637|F16P1_RABIT	Fructose-1,6-bisphosphatase 1 OS=Oryctolagus cuniculus GN=FBP1 PE=1 SV=4	100	0	tr|B8BXS2|B8BXS2_THAPS	Uncharacterized protein OS=Thalassiosira pseudonana GN=THAPSDRAFT_256250 PE=3 SV=1	gi|193215963|ref|YP_001997162.1|	281	1e-91	COG0158	Fructose-1,6-bisphosphatase	G	Carbohydrate transport and metabolism	K03841|1|8e-108|321|ppp:PHYPADRAFT_111251| fructose-1,6-bisphosphatase I [EC:3.1.3.11]	GO:0019253//reductive pentose-phosphate cycle	GO:0042132//fructose 1,6-bisphosphate 1-phosphatase activity;GO:0000287//magnesium ion binding	GO:0005737//cytoplasm
9	EED92819.1	phosphofructokinase [Thalassiosira pseudonana CCMP1335]	44150.2	0.106	4	32	XP_002289282.1	1.295	31	0.002	0.4	EED92819.1	MSHMNVAMMTSGGLAPCLSSSVAYLIEFWAQALKEGKISGLSIRMYFDGYKGVLTGDSTVISPDIYDDCACLHELGGSPIGNSRVKLTNVKDCMARGFVKEGETPLEVAAQQLIKDNINVIHTIGGDDTNTQAAELSKYILEKHGGKVVVVGMPKTIDNDVVPIVQTFGADTAAEQGAIFFKNVVSESSANPRMLIIHEVMGRDSGYLTAATARKYRDSIKATKFVGPGFTTTSTSRDIHAVWIPEVNVNIAEEGERLKKVMDDHGCVNVFLSEGAGVKDIVAEMEAKGEEVPRDAFGHVSLAKINPGLYFSKNLATAVGAEKTLVQKSGYFARSAASNAFDRKLIRDCAEKGVESAIAGVSGCMGQDEAKEGTPIRAIEFERIKGGKPFNPEQAWFQE…	100	0	gi|223999219|ref|XP_002289282.1|	phosphofructokinase [Thalassiosira pseudonana CCMP1335]	54.98	9e-153	sp|G4STG9|PFP_META2	Pyrophosphate--fructose 6-phosphate 1-phosphotransferase OS=Methylomicrobium alcaliphilum (strain DSM 19304 / NCIMB 14124 / VKM B-2133 / 20Z) GN=pfp PE=1 SV=1	100	0	tr|B8BZ41|B8BZ41_THAPS	Pyrophosphate--fructose 6-phosphate 1-phosphotransferase OS=Thalassiosira pseudonana GN=PFK2 PE=3 SV=1	gi|119717322|ref|YP_924287.1|	459	2e-159	COG0205	6-phosphofructokinase	G	Carbohydrate transport and metabolism	K00850|1|5e-24|107|bna:106436268| 6-phosphofructokinase 1 [EC:2.7.1.11]	GO:0016310//phosphorylation;GO:0006096//glycolytic process	GO:0003872//6-phosphofructokinase activity;GO:0047334//diphosphate-fructose-6-phosphate 1-phosphotransferase activity	GO:0005945//6-phosphofructokinase complex
10	EED95846.1	glyceraldehyde-3-phosphate dehydrogenase precursor, partial [Thalassiosira pseudonana CCMP1335]	39942.8	0.349	4	17	XP_002286205.1	1.925	17	0.002	-0.9	EED95846.1	KFIAALSLVAGASAYAPSAFSGSSLRATSNGSSMSMATGMGVNGFGRIGRLVTRIMMEDDDIKLSAINAGSATPDYMAYQYKYDTIHGIAKGTVDIDGDFLVLNGEKIQTSRCRDPKEVGWGALGADYVCESTGVFLTKEKAQAIIDGGAKKVIYSAPAKDDSQTIVMGVNQGEYDGSEDFISCASCTTNGLAPMVKAIHDEFDIQEALMTTVHAMTATQAVVDSSSRKDWRGGRAASGNIIPSSTGAAKAVTKVIPSLQGKLTGMAFRVPTIDVSVVDLTCKLGKATTYEEICAVIKAKSEGEMKGILGYCDEPLVSTDFESDSRSSIFDAGAGIMLNPTFVKLVAWYDNEWGYSGRVVDLMKHVAAVDAKIAA	100	0	gi|223993043|ref|XP_002286205.1|	glyceraldehyde-3-phosphate dehydrogenase precursor [Thalassiosira pseudonana CCMP1335]	71.63	3e-179	sp|O09452|G3PA_GUITH	Glyceraldehyde-3-phosphate dehydrogenase, chloroplastic OS=Guillardia theta GN=GAPC1 PE=2 SV=1	100	0	tr|B8BQU2|B8BQU2_THAPS	Glyceraldehyde-3-phosphate dehydrogenase (Fragment) OS=Thalassiosira pseudonana GN=GAPD1 PE=3 SV=1	gi|343087277|ref|YP_004776572.1|	413	5e-143	COG0057	Glyceraldehyde-3-phosphate dehydrogenase/erythrose-4-phosphate dehydrogenase	G	Carbohydrate transport and metabolism	K00134|1|2e-144|416|sita:101785151| glyceraldehyde 3-phosphate dehydrogenase [EC:1.2.1.12]	GO:0019253//reductive pentose-phosphate cycle;GO:0006006//glucose metabolic process;GO:0055114//oxidation-reduction process	GO:0051287//NAD binding;GO:0050661//NADP binding;GO:0004365//glyceraldehyde-3-phosphate dehydrogenase (NAD+) (phosphorylating) activity;GO:0043891//glyceraldehyde-3-phosphate dehydrogenase (NAD(P)+) (phosphorylating) activity;GO:0047100//glyceraldehyde-3-phosphate dehydrogenase (NADP+) (phosphorylating) activity	GO:0009507//chloroplast
11	ACI64945.1	predicted protein [Thalassiosira pseudonana CCMP1335]	46682.2	0.15	5	21	XP_002296228.1	1.803	21	0.002	0.9	ACI64945.1	MKLFNAALILAVIGNASAFAPAAPSLGLRTVGPSTFDFALDAKKSIEDLSEADLKGKKVLVRCDVNVPLDGKKITDDTRIRSSIPTIEYLKGKGAIVTVCSHLGRPKDGPEDKFSLGPCAERMGELLGQEVKLAPDCIGEEVSTLVNAAKEGDVIMLENTRFYKEEEKNEAGFVEKLAAPFDLFVNDAFGTAHRAHASTEGVTKFLQPSVSGFLLAKELEYLDGAIENGKKPMAAIVGGSKVSSKITVLNALLDKCDKIIIGGGMVFTFLKAKGLNVGTSLVEDDYVETAKEVLAKAEKLGKEILLPSDIVIADKFAADAETKVVSSDAIPDGWMGLDNGPASTAEQKEFLSDCQTVIMNGPMGVFEMKAFEKGTFGLVDILADLSKEKGAITIIGGGD…	100	0	gi|224005154|ref|XP_002296228.1|	predicted protein [Thalassiosira pseudonana CCMP1335]	62.3	3e-180	sp|Q9SBN4|PGKH_VOLCA	Phosphoglycerate kinase, chloroplastic OS=Volvox carteri GN=PGK PE=2 SV=1	100	0	tr|B5YN92|B5YN92_THAPS	Phosphoglycerate kinase OS=Thalassiosira pseudonana GN=THAPS_270304 PE=3 SV=1	gi|434389057|ref|YP_007099668.1|	499	4e-175	COG0126	3-phosphoglycerate kinase	G	Carbohydrate transport and metabolism	K00927|1|0.0|538|ccp:CHC_T00004105001| phosphoglycerate kinase [EC:2.7.2.3]	GO:0050896//response to stimulus;GO:0006096//glycolytic process;GO:0016310//phosphorylation	GO:0004618//phosphoglycerate kinase activity;GO:0000166//nucleotide binding	GO:0009526//plastid envelope;GO:0071944//cell periphery;GO:0016020//membrane;GO:0044434//chloroplast part
12	EED93297.1	phosphoglycerate mutase [Thalassiosira pseudonana CCMP1335]	32540.7	0.041	3	6	XP_002289760.1	2.214	6	0.005	1.1	EED93297.1	MFSAARNAFSIASRTAVNNARVSPSTRCIAAFQTADKSTLVLVRHGESTWNLENKFTGWVDVPLSPKGHEETIEAGRVIKESGIVPDCAFTSLQKRAIRTLDHVLEETDLMWIPVTKSWKLNERHYGGLQGLDKQQTVDEYGKDQVLIWRRSYDIPPPPVDRSSPHHPSNDPRYASFDFPEEWTESLKTTLERVTPFFQEKIVPELKAGKTVLIAAHGNSLRALVKHLDNIGEDVIAELNIPTGTPLVYELDDDLKPIPQDGAMSPLTGRYLGDQDAIRARIEGVKNQTK	100	0	gi|224000175|ref|XP_002289760.1|	phosphoglycerate mutase [Thalassiosira pseudonana CCMP1335]	57.71	5e-99	sp|B3EN99|GPMA_CHLPB	2,3-bisphosphoglycerate-dependent phosphoglycerate mutase OS=Chlorobium phaeobacteroides (strain BS1) GN=gpmA PE=3 SV=1	100	0	tr|B8BZ70|B8BZ70_THAPS	Phosphoglycerate mutase OS=Thalassiosira pseudonana GN=PGAM2 PE=3 SV=1	gi|302340132|ref|YP_003805338.1|	303	2e-102	COG0588	Phosphoglycerate mutase (BPG-dependent)	G	Carbohydrate transport and metabolism	K01834|1|2e-68|215|cre:CHLREDRAFT_99328| 2,3-bisphosphoglycerate-dependent phosphoglycerate mutase [EC:5.4.2.11]	GO:0006096//glycolytic process	GO:0046538//2,3-bisphosphoglycerate-dependent phosphoglycerate mutase activity	-
13	EJK49309.1	hypothetical protein THAOC_31830 [Thalassiosira oceanica]	65064.7	0.091	4	8	-	2.284	8	0.002	1.2	EJK49309.1	MENRIDLAFTASACDMEALSDTFGQLDGEFQSESSKFALIGVAHNSQSFIHPMNKMVLFALLALLFGGADAFVPPPRISVTAPSTSKISAAAGITDYLSSLDSNPQAQSVSELLTTANFKSSQRWRKRTKQLATLGPASSSFEMIEKLFLAGADVFRLNFSHGEYDQKQELYDIIRAVEAKYDHPIAILGDLQGPKLRVGTFANPDGEMLERGQIFRFDLDETPGTNKRVMLPHPEIIEASEVGHDLLIDDGKVKVTVVATGPGYLDCEVIVPGKIKDKKGVNTPDSILEISCLTPKDRADLNFMLDLGVDWIALSFVQRPEDIVEMKGLIMSHNPNNAFPPHIMAKIEKPSCFEGDSLERIVELCDGIMVARGDLGVECAPEDVPILQKTIIEECRHQ…	100	0	gi|397574638|gb|EJK49309.1|	hypothetical protein THAOC_31830 [Thalassiosira oceanica]	47.86	4e-128	sp|P70789|KPYK1_AGRVI	Pyruvate kinase OS=Agrobacterium vitis GN=ttuE PE=2 SV=1	100	0	tr|K0RAI8|K0RAI8_THAOC	Pyruvate kinase OS=Thalassiosira oceanica GN=THAOC_31830 PE=3 SV=1	gi|209965420|ref|YP_002298335.1|	457	1e-154	COG0469	Pyruvate kinase	G	Carbohydrate transport and metabolism	K00873|1|5e-78|259|gsl:Gasu_48930| pyruvate kinase [EC:2.7.1.40]	GO:0044237//cellular metabolic process	GO:0016301//kinase activity;GO:0046872//metal ion binding	-
14	XP_002287523.1	pyruvate dehydrogenase [Thalassiosira pseudonana CCMP1335]	42198.1	0.027	2	7	EED94966.1;EJK55386.1	1.53	7	0.004	0.6	XP_002287523.1	MSTDTATFDLTGSFETYNLDTQPNNTIEMTKDELLSHFELMYTMRRMEITCDNEYKARAIRGFCHLYDGQEAVATGINAAFDPEDSWITSYRCHCTALARGGSVASVLGELFGHVDGQTKGKGGSMHFYNKAHNFFGGQGIVGAQVPVGLGLAFANHYNATPGKPMQVAIACYGDGAANQGQIWESANMASLWKLPMIFCIENNHYGMGTSMDRHSSHSDYYKMGNHIPGVRIDGMNVLAVKEGMRFVKDYVGNGNGPMYVEMMTYRYHGHSMSDPGTTYRNREEIALTRSTRDPLEFVKRTLVDAGFTDAEEIKEIEKRIRKDVANQVKQAKASSKPTVEPHLFEYVYSSDGGKEQNEFPPHIRMPDFAKSKNY	100	0	gi|223995699|ref|XP_002287523.1|	pyruvate dehydrogenase [Thalassiosira pseudonana CCMP1335]	51.55	4e-116	sp|Q6Z5N4|ODPA1_ORYSJ	Pyruvate dehydrogenase E1 component subunit alpha-1, mitochondrial OS=Oryza sativa subsp. japonica GN=Os02g0739600 PE=2 SV=1	100	0	tr|B8BVN4|B8BVN4_THAPS	Pyruvate dehydrogenase OS=Thalassiosira pseudonana GN=PDHA1 PE=4 SV=1	gi|88607434|ref|YP_504713.1|	297	2e-97	COG1071	TPP-dependent pyruvate or acetoin dehydrogenase subunit alpha	C	Energy production and conversion	K00161|1|2e-124|368|cme:CYME_CMT256C| pyruvate dehydrogenase E1 component alpha subunit [EC:1.2.4.1]	GO:0006096//glycolytic process;GO:0055114//oxidation-reduction process	GO:0004739//pyruvate dehydrogenase (acetyl-transferring) activity	GO:0043231//intracellular membrane-bounded organelle
15	XP_002296642.1	hypothetical protein THAPSDRAFT_24399 [Thalassiosira pseudonana CCMP1335]	52970.8	0.042	2	4	EED87037.1	1.693	4	0.041	0.8	XP_002296642.1	MRLLLASTVLSAAIAFAPQQASRLRSTATSSLEASKCGTYDYDVIIIGCGVGGHGAALHSRSQSLTTAVFSGNDVGGTCVNRGCVPSKALLAASGRVREMQNEGHLSEFGITVEGGKESIKYDREGVAGHARQLAERVKGNLEGSLVALGVDIVEGRGVLTGVGHEVKDGTSGKVYTAKDIILAPGSIPFVPPGVTVDEKTVYTSDGALKLQSVPEWVAIIGSGYIGLEFSDVYTALGSEVTFIEALPNIMPTFDREIAKQAERLLIRDRAIDYRTGVEHVETLEVDAAMVATGRVPNTKDMGLEEAGIETQRGFIAVNEKMQVLTKHEDGEVVPNVWCIGDANGKMMLAHAASAQGISAIENICGRDHAVNHDAIPAACFTHPEIAMVGPTEEQAIER…	100	0	gi|224013957|ref|XP_002296642.1|	hypothetical protein THAPSDRAFT_24399 [Thalassiosira pseudonana CCMP1335]	56.3	0	sp|A8MS68|PLPD1_ARATH	Dihydrolipoyl dehydrogenase 1, chloroplastic OS=Arabidopsis thaliana GN=LPD1 PE=2 SV=1	100	0	tr|B8LC90|B8LC90_THAPS	Putative uncharacterized protein DLDH2 OS=Thalassiosira pseudonana GN=DLDH2 PE=3 SV=1	gi|16329347|ref|NP_440075.1|	511	1e-177	COG1249	Pyruvate/2-oxoglutarate dehydrogenase complex, dihydrolipoamide dehydrogenase (E3) component or related enzyme	C	Energy production and conversion	K00382|1|0.0|585|ccp:CHC_T00008441001| dihydrolipoamide dehydrogenase [EC:1.8.1.4]	GO:0042744//hydrogen peroxide catabolic process;GO:0055114//oxidation-reduction process;GO:0045454//cell redox homeostasis;GO:0006086//acetyl-CoA biosynthetic process from pyruvate	GO:0050660//flavin adenine dinucleotide binding;GO:0004148//dihydrolipoyl dehydrogenase activity	GO:0005829//cytosol;GO:0005739//mitochondrion;GO:0005730//nucleolus;GO:0009941//chloroplast envelope;GO:0009570//chloroplast stroma
16	EJK72804.1	hypothetical protein THAOC_05626 [Thalassiosira oceanica]	71437.5	0.04	2	2	-	3.09	2	0.039	1.4	EJK72804.1	MGELLEVYEASTSASLAQYKATHASSISDVSGYWSELAKSKLTWFAPFSEGLSGSFEEGSVSWFAGGRLNFVGKENETAIIWEGDEPGNVKHISFHELKNEVCKIANALKSAGVTKGDVVTLYMPMVPELCYTMLACARIGAIHSVIFAGFSADAIADRIQDAKSKWVVTASAGSRGGRNLPLKTICDAAVKKDRCVGVVEKVFVFDGKGETGSDWEVQDIHVKMTELVAAQRPVCSCEWMDAEDPLFILYTSGSTGRPKGLVHTTGGYALFAMHTTANSFGLSQQTAASTDGPKDVYACVADAGWITGHTYIVYGPLLNGCSTLMFESTPMYPDCGRYWDMVQRHKITVFYTAPTAIRSLMRFGDEAPNKYDLSSLRVLGTVGEPINPAAWKWYFDVI…	100	0	gi|397637786|gb|EJK72804.1|	hypothetical protein THAOC_05626 [Thalassiosira oceanica]	52.22	0	sp|Q54Z60|ACSA_DICDI	Acetyl-coenzyme A synthetase OS=Dictyostelium discoideum GN=acsA PE=3 SV=1	100	0	tr|K0T6W2|K0T6W2_THAOC	Acetyl-coenzyme A synthetase OS=Thalassiosira oceanica GN=THAOC_05626 PE=3 SV=1	gi|357384948|ref|YP_004899672.1|	690	0	COG0365	Acyl-coenzyme A synthetase/AMP-(fatty) acid ligase	I	Lipid transport and metabolism	K01895|1|0.0|619|mus:104000631| acetyl-CoA synthetase [EC:6.2.1.1]	GO:0008152//metabolic process	GO:0003987//acetate-CoA ligase activity;GO:0016208//AMP binding	-
17	XP_002289883.1	predicted protein, partial [Thalassiosira pseudonana CCMP1335]	63799.3	0.055	2	5	EED93420.1	1.71	5	0.473	1.2	XP_002289883.1	GEKGAFEWMTYGEYGEMVDACRTVLKDLGIKEHSKIGIISNNRWEWAALASAAYSLNAAIVPMYESQLPKDWTYILNDSECSALFCSTEEIFVKVVKEVLPNTPLVSNTLCFNTPVGEPHSLLTAIEHAKGKETGVIAPTPEDLAGLIYTSGTTGKPKGVELTHDNFVSNVYAVRTMAEDPTDFIRSSDRSLAFLPWAHSYGQTCELWCAVSHGGSMGICRGVPQILEDLALVQPTVLFAVPTLYKKVYDGVQNLIGTSSPTKQKLMRAALDMGRKYKETGGNLGFVDGIKHKVLDSVVTSKIRGRFGGNLRHGFVAGAACPKEIIDFMDDIGIPICEGYGLTETSPIIAISAPYPGSRKLGSVGKSVGGVNVVIEDPDTHQPLGPGKEGEICCYGRNV…	100	0	gi|224000421|ref|XP_002289883.1|	predicted protein [Thalassiosira pseudonana CCMP1335]	29.44	5e-61	sp|Q7TYX8|FAC15_MYCBO	Long-chain-fatty-acid--CoA ligase FadD15 OS=Mycobacterium bovis (strain ATCC BAA-935 / AF2122/97) GN=fadD15 PE=3 SV=2	100	0	tr|B8BZX2|B8BZX2_THAPS	Uncharacterized protein (Fragment) OS=Thalassiosira pseudonana GN=THAPSDRAFT_262242 PE=4 SV=1	gi|108759016|ref|YP_630755.1|	466	1e-156	COG1022	Long-chain acyl-CoA synthetase (AMP-forming)	I	Lipid transport and metabolism	K01897|1|3e-69|240|thj:104818701| long-chain acyl-CoA synthetase [EC:6.2.1.3]	GO:0008152//metabolic process	GO:0003824//catalytic activity	-
18	ACI64800.1	acetyl-coa carboxylase [Thalassiosira pseudonana CCMP1335]	228702	0.06	2	4	XP_002296083.1	0.94	3	0.244	0.9	ACI64800.1	MAPRRYAVAAAALLASASVTAFAPQQSAFTPQALTSSPNRNIFGALKSAFFPNNDVATSTSLWAATLDETTASSSSSGTTQTVEEYVKARGGNRPIRKVLIANNGMAATKSILSMRQWAYMEFGDERAIQFVAMATPEDLKANAEFVRLADSFVEVPGGKNLNNYANVDVITKIAQEQGVDAVWPGWGHASENPKLPNTLDKMGIKFIGPTGPVMSVLGDKIAANILAQTAKVPSIPWSGSFGGPDDGPLQANLNAEGTIPQEIFEKGLVRSADEAVVAANKIGWENGIMIKASEGGGGKGIRFVDNEADLRNAYVQVSNEVIGSPIFLMQLCKNARHIEVQIVGDQHGNAVALNGRDCSTQRRFQKIFEEGPPVIVPPETFHEMELAAQRLTQNIGYQ…	100	0	gi|224004864|ref|XP_002296083.1|	acetyl-coa carboxylase [Thalassiosira pseudonana CCMP1335]	46.68	0	sp|Q54J08|ACAC_DICDI	Acetyl-CoA carboxylase OS=Dictyostelium discoideum GN=accA PE=3 SV=1	100	0	tr|B5YMF5|B5YMF5_THAPS	Acetyl-coa carboxylase OS=Thalassiosira pseudonana GN=ACC PE=4 SV=1	gi|556569737|ref|YP_008738162.1|	333	3e-90	COG4799	Acetyl-CoA carboxylase, carboxyltransferase component	I	Lipid transport and metabolism	K11262|1|0.0|2045|bpg:Bathy08g01850| acetyl-CoA carboxylase / biotin carboxylase 1 [EC:6.4.1.2 6.3.4.14]	GO:0006633//fatty acid biosynthetic process	GO:0046872//metal ion binding;GO:0005524//ATP binding;GO:0004075//biotin carboxylase activity;GO:0003989//acetyl-CoA carboxylase activity
19	XP_002289446.1	precursor of synthetase [Thalassiosira pseudonana CCMP1335]	31570.9	0.07	2	14	EED92983.1	1.509	12	0.002	0.7	XP_002289446.1	MSANAKVWIDKDTRVICQGFTGKQGTFHSTQAIEYGTNMVGGVTPKKGGQEHLGLPVFDSVADAVLEVKPDASVIYVPPPYCAAAILDAIENEIPLVVAITEGVPQQDMVRVKKALLSQDKTRLIGPNCPGIIKPGECKIGIMPGYIHKAGKIGVVSRSGTLTYEAVHQTTVTGLGQSTCVGIGGDPFNGTNFIDCLERFRDDPQTEGIIMIGEIGGSAEEEAAEWWANNGDPNKPVVGFIAGMTAPPGRRMGHAGAIVAGGKGGANEKFAALEAAGIHVTRSPAQLGTTMMRAMGLAE	100	0	gi|223999547|ref|XP_002289446.1|	precursor of synthetase [Thalassiosira pseudonana CCMP1335]	71.97	1e-128	sp|Q8GTQ9|SUCA1_SOLLC	Succinate--CoA ligase [ADP-forming] subunit alpha-1, mitochondrial OS=Solanum lycopersicum GN=SCOA PE=1 SV=1	100	0	tr|B8C013|B8C013_THAPS	Succinate--CoA ligase [ADP-forming] subunit alpha, mitochondrial OS=Thalassiosira pseudonana GN=SCS2 PE=3 SV=1	gi|389878864|ref|YP_006372429.1|	414	4e-145	COG0074	Succinyl-CoA synthetase, alpha subunit	C	Energy production and conversion	K01899|1|7e-135|388|ota:Ot03g05850| succinyl-CoA synthetase alpha subunit [EC:6.2.1.4 6.2.1.5]	GO:0008152//metabolic process	GO:0004776//succinate-CoA ligase (GDP-forming) activity;GO:0046872//metal ion binding;GO:0003878//ATP citrate synthase activity;GO:0004775//succinate-CoA ligase (ADP-forming) activity;GO:0048037//cofactor binding;GO:0000166//nucleotide binding	GO:0044464//cell part
20	EED93255.1	probable SOLUBLE pyridine nucleotide transhydrogenase [Thalassiosira pseudonana CCMP1335]	50421.7	0.082	4	5	XP_002289718.1	2.328	4	0.019	0.5	EED93255.1	MIGTCSWNCVLNAEVVKLLEYVFSSRIFFCTHQRNHTSVWNEIVNSCLELASSNARDTIRQLEYAGVTYVQGAAAFADSRGSSSLFITSPDMSVSTVSSDKILLATGSTPFRPGGIPFDGKRVFDSDSINTLSRLPKSVAITGSGIIAIEFAKIFKNLGSDVTLIIRDNIPRNALMKIGLDKDIAATLVADLVRSGIKIERGAQVKKFTVPRDNDKAPMVLELEAKGGGERPSGEITTLKCDIYLAAVGRKPNTMNLNLAAAGIKTDQYGGIAVDSDLRSTATGGNVYAAGDVLGRPFLASTGMAQGFAAIRRMFRDDISLAANPFAFPIGVWSSPEASYYGLSTQQCKEMGIDAGEGVALYAECLRGLVFSPNGLLKLVFDKSNGRIMGVHICGDDAC…	100	0	gi|224000091|ref|XP_002289718.1|	probable SOLUBLE pyridine nucleotide transhydrogenase [Thalassiosira pseudonana CCMP1335]	32	2e-54	sp|Q48A14|STHA_COLP3	Soluble pyridine nucleotide transhydrogenase OS=Colwellia psychrerythraea (strain 34H / ATCC BAA-681) GN=sthA PE=3 SV=1	100	0	tr|B8BYY9|B8BYY9_THAPS	Probable SOLUBLE pyridine nucleotide transhydrogenase OS=Thalassiosira pseudonana GN=THAPSDRAFT_268657 PE=4 SV=1	gi|159184862|ref|NP_354649.2|	208	4e-60	COG1249	Pyruvate/2-oxoglutarate dehydrogenase complex, dihydrolipoamide dehydrogenase (E3) component or related enzyme	C	Energy production and conversion	K00382|1|7e-43|163|vcn:VOLCADRAFT_83716| dihydrolipoamide dehydrogenase [EC:1.8.1.4]	GO:0045454//cell redox homeostasis;GO:0055114//oxidation-reduction process	GO:0050660//flavin adenine dinucleotide binding;GO:0003957//NAD(P)+ transhydrogenase (B-specific) activity;GO:0016668//oxidoreductase activity, acting on a sulfur group of donors, NAD(P) as acceptor	GO:0005737//cytoplasm
21	EED94112.1	predicted protein [Thalassiosira pseudonana CCMP1335]	77429.1	0.067	4	6	XP_002288676.1	1.638	6	0.001	1.4	EED94112.1	MKVSSIALFLLPLAHSACAWTSSPHASVSAHHRRSRSSTLAATPTFLGSTTVDAAEKVKDADALAIEAAAAAAAAAAAVTNTNERTFGTVSTSKLNKLYDLVVIGGGPAGVAGAIKAAQMGRRAILIDKPKFDAGVLPNGLDLFFGGPTGLFSKALRDSAKNTNVAAMRAQHMDSDVIWKQITNDIVKLASRNAEGQCRTLARYGIDYLQGSAQLLGEDDDKNVNALKKFKNDLDSPENGVRSVSVSNTVLVDKDGNLMEESEVTVTGTKVLVATGSKSTRLRGIPFEQSHRVFDSDTINLLGYFPRSVTISGLGIIGIEFANIFNALGVKDVKILVRGDVESSTKKLGMDMDVANELMRLLRESGVQILERTTIEEFSYVPSPEKTDEYIQMKLTDGS…	100	0	gi|223998006|ref|XP_002288676.1|	predicted protein [Thalassiosira pseudonana CCMP1335]	30.49	5e-41	sp|P9WHH5|STHA_MYCTU	Probable soluble pyridine nucleotide transhydrogenase OS=Mycobacterium tuberculosis (strain ATCC 25618 / H37Rv) GN=sthA PE=1 SV=1	100	0	tr|B8BWY9|B8BWY9_THAPS	Uncharacterized protein OS=Thalassiosira pseudonana GN=THAPSDRAFT_21619 PE=4 SV=1	gi|430743905|ref|YP_007203034.1|	202	9e-56	COG1249	Pyruvate/2-oxoglutarate dehydrogenase complex, dihydrolipoamide dehydrogenase (E3) component or related enzyme	C	Energy production and conversion	K00382|1|4e-27|119|cre:CHLREDRAFT_57890| dihydrolipoamide dehydrogenase [EC:1.8.1.4]!K00383|3|6e-27|119|bpg:Bathy01g05260| glutathione reductase (NADPH) [EC:1.8.1.7]	GO:0045454//cell redox homeostasis;GO:0055114//oxidation-reduction process	GO:0050660//flavin adenine dinucleotide binding;GO:0016491//oxidoreductase activity;GO:0005509//calcium ion binding	GO:0005737//cytoplasm
22	EJK60133.1	hypothetical protein THAOC_19570, partial [Thalassiosira oceanica]	145770	0.029	3	10	-	1.54	10	0.003	1.1	EJK60133.1	RLSSRRRWGRRRGVSEAYRAAIGREEDRLAIHADVGRFGTDDPATWSMGDRLTFLELKFIDMLGSSIPKRSSVYRKLTLLEFKAAPRNFAIQDKQKKWKDDSAMHAPSPGGRTPNFGAAIMRVKFEVWPRGGNGRGRRSAFGSALSLPSCVRDAFPESHTCRDCLGEGRPFGKIMAANRGEIATRIMRAGSELGCGTVGIYSHEDRFTQHRYKADQAFQLNTDKSPVAAYLDIDTIVDLCCQHGVQAVHPGYGFLSENAGFAQKLEENGVKFIGPTVDNLNTFGDKTSAKELAIKAGVPVIVGSDDAFATPAQAEAWINSSPITYPVIVKAAMGGGGRGIRIVPTADDLDQMFRLASNEALNAFGDGRCFVEKYVDQPRHIEVQCLGDGTGNVIHLYDR…	100	0	gi|397608901|gb|EJK60133.1|	hypothetical protein THAOC_19570, partial [Thalassiosira oceanica]	53.32	0	sp|O17732|PYC1_CAEEL	Pyruvate carboxylase 1 OS=Caenorhabditis elegans GN=pyc-1 PE=1 SV=1	100	0	tr|K0S261|K0S261_THAOC	Uncharacterized protein (Fragment) OS=Thalassiosira oceanica GN=THAOC_19570 PE=4 SV=1	gi|15615188|ref|NP_243491.1|	1152	0	COG1038	Pyruvate carboxylase	C	Energy production and conversion	K01958|1|0.0|1176|mis:MICPUN_96455| pyruvate carboxylase [EC:6.4.1.1]	GO:0006094//gluconeogenesis	GO:0004736//pyruvate carboxylase activity;GO:0046872//metal ion binding;GO:0005524//ATP binding;GO:0004075//biotin carboxylase activity	-
23	EJK74797.1	hypothetical protein THAOC_03499 [Thalassiosira oceanica]	48911.2	0.101	2	12	-	1.395	13	0.002	0.5	EJK74797.1	MPALSSTMKEGKVVSWLKGEGDSVEAGEAIMVVESDKADMDVEAFEDGFIAAIITEEGEAANVGSPVALIAANEADIPALKSYAATLGGAAPVAAAPTPAPAAAAAPKASPKAAANPAASAGGRVVASPLAKKMAEEMGVDLSTVSGTGPNGRITAADVTNAASGAAPAKKAAAPVKPRLCSSTLSWTPAPGVIAATPTARALAKKAKLDLASIPGTGEFGRVTADDVKIATGQMKPKRAKAAPGAPAPVEMPEGLVPFTGMQRAVSNNMVATLDCPVFRASREIEMDAFNALYQSVKPKGVTVSALLAKAVAKAIEKHPIVNSSFREEGTFFNKDINIAMAVAIDGGLITPVLKYANERDVLDIGENWKELVGKAKSGTLSPDEYNSGTFTISNMGMF…	100	0	gi|397641689|gb|EJK74797.1|	hypothetical protein THAOC_03499 [Thalassiosira oceanica]	47.83	3e-73	sp|Q9SQI8|ODP24_ARATH	Dihydrolipoyllysine-residue acetyltransferase component 4 of pyruvate dehydrogenase complex, chloroplastic OS=Arabidopsis thaliana GN=LTA2 PE=2 SV=1	100	0	tr|K0TPS3|K0TPS3_THAOC	Dihydrolipoamide acetyltransferase component of pyruvate dehydrogenase complex OS=Thalassiosira oceanica GN=THAOC_03499 PE=3 SV=1	gi|428771697|ref|YP_007163487.1|	359	9e-119	COG0508	Pyruvate/2-oxoglutarate dehydrogenase complex, dihydrolipoamide acyltransferase (E2) component	C	Energy production and conversion	K00627|1|8e-93|296|ccp:CHC_T00007488001| pyruvate dehydrogenase E2 component (dihydrolipoamide acetyltransferase) [EC:2.3.1.12]	GO:0006090//pyruvate metabolic process;GO:0006694//steroid biosynthetic process;GO:0009108//coenzyme biosynthetic process;GO:0006633//fatty acid biosynthetic process;GO:0006084//acetyl-CoA metabolic process;GO:0006790//sulfur compound metabolic process;GO:0006520//cellular amino acid metabolic process;GO:0006725//cellular aromatic compound metabolic process;GO:0046483//heterocycle metabolic proce…	GO:0004742//dihydrolipoyllysine-residue acetyltransferase activity	GO:0009941//chloroplast envelope;GO:0016020//membrane;GO:0022626//cytosolic ribosome;GO:0009570//chloroplast stroma;GO:0009534//chloroplast thylakoid
24	EJK47539.1	hypothetical protein THAOC_33731, partial [Thalassiosira oceanica]	103578	0.018	1	1	-	1.43	9	0.021	0.3	EJK47539.1	VSSSDDEALLRSDVRTMGALLGDAISQHHGPEVFEKIEALRSMAKASRLAEADAGGSRLGPMVDFVSGLSEPELVVISRAFAHFLGIANAAEAHQRCRRLAEDSRREGAEGHLGALHETKRDSTAGVLAGFLDGGDGVRRDRAHRAPHAGQPPHAPREARAGPDRAHRGRPDPAVGHALRAEGARRRAPAGDRVDMADGRGVEGQAQSAERGREGDAGPRDGALGGPAEVPEEARRDHEGQDGGGVRTAAQGESVQVRVVDGRRSRRGAFDDVCNLALTAHTRLAGTKGNPNVVADVTREVTLTNRLKAAELFEKDVRELMSLISGNPPRGMNDTCQTESEAMDKVRARAGVESRAPFRSYLNPVATKLGKTADWARQELSKLQGEATPANTILPEDVY…	100	0	gi|397570934|gb|EJK47539.1|	hypothetical protein THAOC_33731, partial [Thalassiosira oceanica]	44.01	2e-163	sp|Q6F6Q6|CAPP_ACIAD	Phosphoenolpyruvate carboxylase OS=Acinetobacter baylyi (strain ATCC 33305 / BD413 / ADP1) GN=ppc PE=3 SV=1	100	0	tr|K0R6G7|K0R6G7_THAOC	Uncharacterized protein (Fragment) OS=Thalassiosira oceanica GN=THAOC_33731 PE=4 SV=1	gi|507524157|ref|YP_008045770.1|	511	1e-165	COG2352	Phosphoenolpyruvate carboxylase	C	Energy production and conversion	K01595|1|8e-163|505|brp:103866650| phosphoenolpyruvate carboxylase [EC:4.1.1.31]	GO:0006107//oxaloacetate metabolic process;GO:0015977//carbon fixation;GO:0006099//tricarboxylic acid cycle	GO:0000287//magnesium ion binding;GO:0008964//phosphoenolpyruvate carboxylase activity	-
25	XP_002290798.1	glucose-6-phosphate 1-dehydrogenase, partial [Thalassiosira pseudonana CCMP1335]	57720.9	0.018	2	2	EED92550.1;EJK44722.1	1.21	4	0.05247	1.7	XP_002290798.1	IAVVVVGASGDLAKKKTYPSLLSLYADYLLPHNVIIFGYARSNITSEDLREKIRPYLTKGERQYDENVIDSFLSKCFYQSGMVYGDVDSWKDLHQKLTFHEQELANSKGITKYNRLFYFAIPPNVFAETGEAIKSACMSSNGFNRMIVEKPFGRDLDSCKDILNRLGKHFEEKDLFRIDHYLGKEMVQNLMVMRFGNLWMENIWNRNNVQCIMLTFKEPFGTEGRGGYFDQYGIIRDIIQNHLLQVMCLLTMECPNKVRAGEKIRDEKVRVLEAMPPVTLDEVFLGQYEGYTDDETITNKDSNCPTFACVRCFINNPRWAGVPIVFKAGKALNERKAEMRIQFKDAPAAEHLFGTKVPRNEMVMKLQPVETIYMKSNIKTPGFSSAPIQSELEVKYDSR…	100	0	gi|224002252|ref|XP_002290798.1|	glucose-6-phosphate 1-dehydrogenase [Thalassiosira pseudonana CCMP1335]	50.92	2e-164	sp|Q42919|G6PD_MEDSA	Glucose-6-phosphate 1-dehydrogenase, cytoplasmic isoform OS=Medicago sativa PE=2 SV=1	100	0	tr|B8C3E7|B8C3E7_THAPS	Glucose-6-phosphate 1-dehydrogenase (Fragment) OS=Thalassiosira pseudonana GN=THAPSDRAFT_34514 PE=3 SV=1	gi|383452925|ref|YP_005366914.1|	309	4e-98	COG0364	Glucose-6-phosphate 1-dehydrogenase	G	Carbohydrate transport and metabolism	K00036|1|1e-168|489|ccp:CHC_T00010152001| glucose-6-phosphate 1-dehydrogenase [EC:1.1.1.49 1.1.1.363]	GO:0006006//glucose metabolic process;GO:0055114//oxidation-reduction process	GO:0004345//glucose-6-phosphate dehydrogenase activity;GO:0050661//NADP binding	-
26	EED87898.1	precursor of synthase [Thalassiosira pseudonana CCMP1335]	52559.7	0.091	4	20	XP_002294538.1	1.08	3	0.312	0.9	EED87898.1	MNSLASAARSLLQRQSRTISKSAASVSVRSVTTLQETLAAQVPSKQASLAALKKDHGSKVIGKVTIDQLIGGARGVKCMLWETSNLDADEGIRFRGLTIPECQQVLPTFSGKAGDGEPLLESLIWLLLTSEVPTKEQVDTLTAELHQRSLKLPDHVVPLLNSLPKDMHPMTQFSIGLNAAQTASTFAKAYADGVPKNEYHKYALEDILNVFAIIPEIAATIYRNVYFDGVVTKDTSLDYSGNFCRMLGYDNPSFDELMRLYLCIHTDHEGGNASAHTTHLVGSTLSDPYLSYAAGLNALAGPLHGLANQEVLKWIQALQDKFAKEGKEVNADTITEFAWETLNAKKVIPGYGHAVLRKTDPRYTCQREFGLKHMPDDDLFKIVDTIYQVMPGILTEHGK…	100	0	gi|224011770|ref|XP_002294538.1|	precursor of synthase [Thalassiosira pseudonana CCMP1335]	59.08	1e-178	sp|Q9W401|CISY_DROME	Probable citrate synthase, mitochondrial OS=Drosophila melanogaster GN=kdn PE=2 SV=1	100	0	tr|B8CEG2|B8CEG2_THAPS	Citrate synthase OS=Thalassiosira pseudonana GN=CSN1 PE=3 SV=1	gi|375013701|ref|YP_004990689.1|	471	7e-163	COG0372	Citrate synthase	C	Energy production and conversion	K01647|1|0.0|518|ppp:PHYPADRAFT_140151| citrate synthase [EC:2.3.3.1]	GO:0044262//cellular carbohydrate metabolic process;GO:0006099//tricarboxylic acid cycle	GO:0004108//citrate (Si)-synthase activity	-
27	XP_002293997.1	succinate dehydrogenase flavoprotein subunit [Thalassiosira pseudonana CCMP1335]	69699	0.071	4	5	EED89006.1	1.02	8	0.7763	1.3	XP_002293997.1	MLSAFARRASSKATKLASTAPTPTTAVRSLSTSTTGDYTIVDHTYDALVIGAGGSGLRAAMGLSEAGFKTACVSKLFPTRSHTVAAQGGINAALGNMGPDDWRWHMYDTVKGSDWLGDQDAIHYMCREAPKAVLELEEFGLPFSRTEEGKIYQRAFGGQSLDFGKGGQAHRCCAAADRTGHAMLHTLYGRSLAFDTTYFIEYFAMDLLMTPDGQCVGAMALNMEDGTLHRIKAKNTVLATGGYGRTYFSCTSAHTCTGDGNAMAMRAGLANQDAEFVQFHPTGIYGAGCLITEGCRGEGGILRNSEGERFMERYAPSAKDLASRDVVSRAMTMEIREGRGVGPKKDHCYLHLDHLPAELLAERLPGISETAAIFAGVDVTKEPIPVLPTVHYNMGGIPT…	100	0	gi|224010078|ref|XP_002293997.1|	succinate dehydrogenase flavoprotein subunit [Thalassiosira pseudonana CCMP1335]	74.14	0	sp|O82663|SDHA1_ARATH	Succinate dehydrogenase [ubiquinone] flavoprotein subunit 1, mitochondrial OS=Arabidopsis thaliana GN=SDH1-1 PE=1 SV=1	100	0	tr|B8CCT7|B8CCT7_THAPS	Succinate dehydrogenase [ubiquinone] flavoprotein subunit, mitochondrial OS=Thalassiosira pseudonana GN=THAPSDRAFT_42475 PE=3 SV=1	gi|217979667|ref|YP_002363814.1|	824	0	COG1053	Succinate dehydrogenase/fumarate reductase, flavoprotein subunit	C	Energy production and conversion	K00234|1|0.0|915|ppp:PHYPADRAFT_181904| succinate dehydrogenase (ubiquinone) flavoprotein subunit [EC:1.3.5.1]	GO:0022900//electron transport chain;GO:0006099//tricarboxylic acid cycle	GO:0050660//flavin adenine dinucleotide binding;GO:0008177//succinate dehydrogenase (ubiquinone) activity	-
28	XP_002289528.1	fumarate hydratase [Thalassiosira pseudonana CCMP1335]	68132.5	0.109	5	6	EED93065.1	1.22	11	0.00574	1.7	XP_002289528.1	MAAYLKRAAMIRSVRSHASSLLPSLASSTLPSASTPLIGNFISLNACNTLLDRWLSSSAGNVEVTKTSRSSSKKIKPSPPAFNYTPLFDSAPDTTTSYRQILPSSAVETVSLPDGTSLLRVSEEALRTLSSTAFEDIAHLLRPAHLAQLRKILDDPEASDNDRFVAMELLKNANIASGRILPGCQDTGTAIVMGKRGHLVLTDGNDEEHLSGGAYDAYTRSNLRYSQVAPVSMFEEKNTGTNLPAQVDIFGAKGDEYNFLFIAKGGGSANKTFLYQQTKALLNTGSLDAFLKEKIKTIGTSACPPYHLAVVIGGLSAEQNLKTVKLASTKYYDTLPTEGDPNGSGRAFRDVEWEEHILEMTRNLGIGAQFGGKYFCHDVRVVRLPRHGASCPVGIGVSC…	100	0	gi|223999711|ref|XP_002289528.1|	fumarate hydratase [Thalassiosira pseudonana CCMP1335]	60.89	0	sp|P0AC33|FUMA_ECOLI	Fumarate hydratase class I, aerobic OS=Escherichia coli (strain K12) GN=fumA PE=1 SV=2	100	0	tr|B8C0H3|B8C0H3_THAPS	Fumarate hydratase OS=Thalassiosira pseudonana GN=FUM1 PE=4 SV=1	gi|269125334|ref|YP_003298704.1|	757	0	COG1951	Tartrate dehydratase alpha subunit/Fumarate hydratase class I, N-terminal domain	C	Energy production and conversion	K01676|1|0.0|787|vcn:VOLCADRAFT_77105| fumarate hydratase, class I [EC:4.2.1.2]	GO:0006091//generation of precursor metabolites and energy	GO:0004333//fumarate hydratase activity	-
29	XP_002286889.1	Long-chain-fatty-acid--CoA ligase, partial [Thalassiosira pseudonana CCMP1335]	60265.5	0.018	3	6	EED96530.1	0.92	18	0.062	2.1	XP_002286889.1	LAIFENTCPEWMIGALGAYSQSISITTVYATLGIDAVIDSINDGRIRAILCNKRNVSLLLSKIKDMPSLKHIIYTNDMIAPGESVNIATPPKDVKVSSFEDFVNAGDTKAFPIVPPTPETCAVIMYTSGSTGKPKGVVVTHKNVLATTSMVTEIINENDVFVAYLPLAHIFELVAEFSCLAMGSCICYADPKTLTATGSYPVGALEQYRPTLMVGVPKIWDVIKKGIQAKVAGGSKVAQFLVATAFEARSRAMKLGFDTPLFKALVFKKFSKVVGGRLRLAVSGGGPLNADVQGFISTCFGCPLGQGYGLTETCAGLTLQDLADDRVGIAGVPIPCVEVKLVSCPEINDKAGLPYLTSDRKDVNGKSVFGRGEIWVKGANVGLGYYMMAEKSKEDFDED…	100	0	gi|223994411|ref|XP_002286889.1|	Long-chain-fatty-acid--CoA ligase [Thalassiosira pseudonana CCMP1335]	36.65	2e-111	sp|Q9SJD4|LACS8_ARATH	Long chain acyl-CoA synthetase 8 OS=Arabidopsis thaliana GN=LACS8 PE=1 SV=1	100	0	tr|B8BRF3|B8BRF3_THAPS	Long-chain-fatty-acid--CoA ligase (Fragment) OS=Thalassiosira pseudonana GN=ACS1 PE=4 SV=1	gi|397689178|ref|YP_006526432.1|	203	3e-56	COG1022	Long-chain acyl-CoA synthetase (AMP-forming)	I	Lipid transport and metabolism	K01897|1|1e-116|363|gra:105770725| long-chain acyl-CoA synthetase [EC:6.2.1.3]	GO:0001676//long-chain fatty acid metabolic process	GO:0004467//long-chain fatty acid-CoA ligase activity	-
30	EJK67845.1	hypothetical protein THAOC_11060 [Thalassiosira oceanica]	38034.4	0.073	1	1	-	1.94	12	0.004	1.1	EJK67845.1	MQVDRRTPDRQEVPDLVQNVSPPSSHDQLKKLTTVVADSGDFNAIKQYSPQDATTNPSLIYKAALMPEYSSLVNEAVEYGKGDLLVTMDKLAVSFGAEISKIVPGYVSTEVDARLSFDTEGSIAKARELIQMYSEVGIDKSRILIKLAATWEGIQAAKVLEAEGISCNLTLIFSIAQAIACAEVGATLISPFVGRIMDWYKKRDNVEGYAPAEDPGVKSVTSIYNYFKKFGYSTIVMGASFRNKDEIAELAGCDRLTISPKLLEELSSSASDLPKKLDAEKAKDMEIERVDMNEKTFRWMMNEDAMATEKLAEGLRGFARDIEKLEKIVQEKLSNKRQKKGE	100	0	gi|397625569|gb|EJK67845.1|	hypothetical protein THAOC_11060 [Thalassiosira oceanica]	63.23	3e-136	sp|Q6MAI4|TAL_PARUW	Transaldolase OS=Protochlamydia amoebophila (strain UWE25) GN=tal PE=3 SV=1	100	0	tr|K0SR21|K0SR21_THAOC	Transaldolase OS=Thalassiosira oceanica GN=THAOC_11060 PE=3 SV=1	gi|338733396|ref|YP_004671869.1|	419	4e-146	COG0176	Transaldolase	G	Carbohydrate transport and metabolism	K00616|1|3e-129|377|gsl:Gasu_24580| transaldolase [EC:2.2.1.2]	GO:0006098//pentose-phosphate shunt	GO:0004801//sedoheptulose-7-phosphate:D-glyceraldehyde-3-phosphate glyceronetransferase activity	GO:0005737//cytoplasm
31	EJK58205.1	hypothetical protein THAOC_21689 [Thalassiosira oceanica]	52326.5	0.068	2	5	-	0.65	31	0.012	0.9	EJK58205.1	MAKVSRRLPISGRATRARPCPRKRTTPEQKQDEENLTPSVLSPVTPALRVATPGAKSKRYVLLGLGTYDADKPVDSPTLMKIGSAVSSACHDEKRAASASVLLPGDRLGPSLYRDFATAFYSGLYADNRYRTGKKVEVKAEDVKSVKILVEGGDADGAAADIAAGMNVAAGCSLTKDIVNAPHNVLNSESLADTARRIAEESGGCITAEILGKKECEERGMGAYLGVARGSETEPQFIHLTYKPEGEVKKKVGCVGKGLLFDTGGYNIKTAMMELMKFDCGGSAAVLGAARAVGQNKPDGVEVHFVVAACENMINARAVVPSDILTASNGKTIEVLNTDAEGRLTLADALVFADKECGCESIIELSTLTGACMISLGKQICGVWTEDDDLAKELDEVSK…	100	0	gi|397602547|gb|EJK58205.1|	hypothetical protein THAOC_21689 [Thalassiosira oceanica]	47.5	2e-115	sp|P30184|AMPL1_ARATH	Leucine aminopeptidase 1 OS=Arabidopsis thaliana GN=LAP1 PE=1 SV=1	100	0	tr|K0RYY1|K0RYY1_THAOC	Uncharacterized protein OS=Thalassiosira oceanica GN=THAOC_21689 PE=4 SV=1	gi|158336127|ref|YP_001517301.1|	368	3e-121	COG0260	Leucyl aminopeptidase	E	Amino acid transport and metabolism	K01255|1|1e-119|365|sind:105162933| leucyl aminopeptidase [EC:3.4.11.1]	GO:0009987//cellular process;GO:0006810//transport;GO:0006508//proteolysis;GO:0006970//response to osmotic stress;GO:0006006//glucose metabolic process;GO:0046686//response to cadmium ion	GO:0030145//manganese ion binding;GO:0004177//aminopeptidase activity;GO:0008235//metalloexopeptidase activity	GO:0005829//cytosol;GO:0009570//chloroplast stroma;GO:0005773//vacuole
32	XP_002295475.1	valyl-tRNA synthetase [Thalassiosira pseudonana CCMP1335]	112917	0.033	3	3	ACI64192.1	0.63	11	0.213	-1.1	XP_002295475.1	MADAYHPEAVESAWQDWWEASGFYSCDPSTAIAKPDSEKFVMVIPPPNVTGSLHLGHALTAAVEDTLTRWHRMKGHATLYIPGTDHAGIATQSVVEKMIMKQSNQTRHDLGREAFISKVWEWKSEYGNRITTQLRRLGSSVDWSRERFTMDDMCSKAVVEAFNRFHEDGLLYRAERLGNWSCALKSAISDIEVDYIDLDGRTFLEVKTHKGNKNDAKGRYEFGVLTSFAYPIEDSEEQLVVATTRLETMLGDTAVAIHPEDPRYTHLHGKCVVHPFNGRKIPIVCDKELVDMSFGTGAVKITPAHDPNDYECGKRHNLEFITVLTPDGAINHNGSQFEGMMRYDARIAVEEALKEKGLYKGKEPNKMRLGLCSRSGDILEPMITPQWYVNCSDMAKRST…	100	0	gi|224011401|ref|XP_002295475.1|	valyl-tRNA synthetase [Thalassiosira pseudonana CCMP1335]	52.38	0	sp|Q86KU2|SYVC_DICDI	Probable valine--tRNA ligase, cytoplasmic OS=Dictyostelium discoideum GN=valS1 PE=3 SV=1	100	0	tr|B5YM58|B5YM58_THAPS	Valyl-tRNA synthetase OS=Thalassiosira pseudonana GN=VTS1 PE=3 SV=1	gi|78485844|ref|YP_391769.1|	754	0	COG0525	Valyl-tRNA synthetase	J	Translation, ribosomal structure and biogenesis	K01873|1|0.0|1050|mis:MICPUN_96323| valyl-tRNA synthetase [EC:6.1.1.9]	GO:0006438//valyl-tRNA aminoacylation;GO:0006450//regulation of translational fidelity	GO:0004832//valine-tRNA ligase activity;GO:0002161//aminoacyl-tRNA editing activity;GO:0005524//ATP binding	GO:0005737//cytoplasm
33	EJK54495.1	hypothetical protein THAOC_25871, partial [Thalassiosira oceanica]	66395.2	0.075	2	3	-	1.885	3	0.035	1.4	EJK54495.1	LAPPPPLARRAGGLPPLSHGPLATIAFICSPAAAAAGQPETREVFSMGGVENTAAWKALEAHYASMSTTHVKDLFAADPDRFNKHSMKFEDLLLDYSKNCVTEETMGLLYKLAEETDVSGLAKKMYSGEKINLTEGRAVLHVALRNQSNTPIYVDGKNVMPEVNEVLGKIKVFVENVRSGAWKGHTGKSIETVVNIGIGGSDLGPVMVTEALKPYCKRDLKMLFCSNVDGTHIAEILKQCDPETTLCLIASKTFTTQETMTNAGTAKKWLLDYYKGDESCVAKHFAALSTNAAAVSAFGIDTNNMFGFWDWVGGRYSLWSAIGTPIALSLGFDAWMEMHAGAHAMDQHFLNADPKENLPMTLALIGIWYNNFHKAESLAILPYDQYMHRFAAYFQQGDM…	100	0	gi|397589021|gb|EJK54495.1|	hypothetical protein THAOC_25871, partial [Thalassiosira oceanica]	66.91	0	sp|B5XY03|G6PI_KLEP3	Glucose-6-phosphate isomerase OS=Klebsiella pneumoniae (strain 342) GN=pgi PE=3 SV=1	100	0	tr|K0RMX2|K0RMX2_THAOC	Glucose-6-phosphate isomerase (Fragment) OS=Thalassiosira oceanica GN=THAOC_25871 PE=3 SV=1	gi|512550233|ref|YP_008088139.1|	754	0	COG0166	Glucose-6-phosphate isomerase	G	Carbohydrate transport and metabolism	K01810|1|7e-163|479|ccp:CHC_T00009370001| glucose-6-phosphate isomerase [EC:5.3.1.9]	GO:0006096//glycolytic process;GO:0006094//gluconeogenesis	GO:0004347//glucose-6-phosphate isomerase activity	GO:0005737//cytoplasm
34	EED89002.1	serine hydroxymethyltransferase [Thalassiosira pseudonana CCMP1335]	53288.9	0.055	2	6	XP_002293993.1	0.47	16	0.011	0.2	EED89002.1	MSDSNKRAKMTSFKDSEFTGLKPLSEHDPLLFDLIEKEKLRQYTSLELIASENFTSRAVMDCLGSALTNKYSEGLPHARYYGGNEIVDQVEELCQKRALEAYGLDEKEWGVNVQPYSGSPANFAVYTGLLRPHDRIMGLDLPSGGHLTHGFYTYSKKEGTRKAVSATSVYFESLPYQVDQTTGIINYDQLERDASLFKPAMIIAGGSAYPRDWDYARFRKIADENGALLIMDMAHISGLVATKEQKSPFEYCDVVTTTTHKSLRGPRAGMIFFRRDERGFEHKINQAVFPALQGGPHEHQIAGVATQLLEVMTPEFHQYSAQVRKNAQALGNKLISLGYSLATGGTENHLVLWDLKPQKLTGSKFEKVCDAVSITLNKNCVPGDRSAVTPGGVRIGAPA…	100	0	gi|224010070|ref|XP_002293993.1|	serine hydroxymethyltransferase [Thalassiosira pseudonana CCMP1335]	63.03	0	sp|O23254|GLYC4_ARATH	Serine hydroxymethyltransferase 4 OS=Arabidopsis thaliana GN=SHM4 PE=1 SV=1	100	0	tr|B8CCS6|B8CCS6_THAPS	Serine hydroxymethyltransferase OS=Thalassiosira pseudonana GN=THAPSDRAFT_26031 PE=3 SV=1	gi|291288227|ref|YP_003505043.1|	373	1e-124	COG0112	Glycine/serine hydroxymethyltransferase	E	Amino acid transport and metabolism	K00600|1|0.0|633|bpg:Bathy06g02150| glycine hydroxymethyltransferase [EC:2.1.2.1]	GO:0006730//one-carbon metabolic process;GO:0032259//methylation;GO:0019264//glycine biosynthetic process from serine	GO:0030170//pyridoxal phosphate binding;GO:0008168//methyltransferase activity;GO:0004372//glycine hydroxymethyltransferase activity	GO:0005737//cytoplasm
35	EJK45719.1	isocitrate lyase [Thalassiosira oceanica]	26966.4	0.051	4	12	XP_002295742.1;ACI64459.1	1.73	11	0.001	0.4	EJK45719.1	MWESSNPFALSNAAARRVADSIFGEKGSVYFDWEACRVREGYYRIKPGVEYCIQRARAYAPHSDLIWMETGKPGIPVARKFSQGVKAVFPHQMLAYNLRCVKIVCCFHLLIYQHNDIYICLSPSFNWDASGMSDEQLAKFNDDLGKLGYVWQFITLAGFHSNGLIITKLARSFGDEGMLAYVRDIQRQEKVQEVELLKHQKWSGAELVDRMVNVASGGQSSTAAMGAGVTESQFGKH	100	4e-180	gi|397567679|gb|EJK45719.1|	isocitrate lyase [Thalassiosira oceanica]	45.53	1e-65	sp|Q9SE26|ACEA_DENCR	Isocitrate lyase OS=Dendrobium crumenatum GN=ICL PE=2 SV=1	100	9e-179	tr|K0R325|K0R325_THAOC	Isocitrate lyase OS=Thalassiosira oceanica GN=THAOC_35650 PE=4 SV=1	gi|383762477|ref|YP_005441459.1|	154	1e-42	COG2224	Isocitrate lyase	C	Energy production and conversion	K01637|1|8e-68|221|zma:103633249| isocitrate lyase [EC:4.1.3.1]	GO:0019752//carboxylic acid metabolic process	GO:0004451//isocitrate lyase activity	-
36	XP_002294422.1	3-isopropylmalate dehydratase [Thalassiosira pseudonana CCMP1335]	87390.9	0.135	5	9	EED88256.1	0.67	7	0.002	-0.7	XP_002294422.1	MIFRFAAVAATLVLSRSVESFAPHKSFTRPIVSVGASTTSLSAASTLYDKIWSDHVVNDDGLSSLLYIDRHLVHEVTSPQAFEGLRLANRSVRRPDCTLSTVDHNVPTTDRSALVDVASFIEETASRTQVLQLQTNVADFDIPYFGMEDERQGIVHIIGPEQGFTLPGTTCVCGDSHTATHGAFGALAFGIGTSEVEHVLATQTLPQTKAKNMLIRIDGDLLPGVTSKDIILHICSVIGTAGGTGATIEFAGKAIENLSMEARMSISNMAIEAGARAGIIAPDDVTFEYLKGRPMCPSGEDWDRAVEYWRSLKTDEGAVFDKTVVIEAKDIAPTVTWGTSPQDAMPVDGIVPRIDEPGHDEARQAAVKRSLEYIGLEGGEPIEGTPIGKVFIGSCTNGR…	100	0	gi|224010930|ref|XP_002294422.1|	3-isopropylmalate dehydratase [Thalassiosira pseudonana CCMP1335]	61.41	0	sp|P55251|LEUC_RHIPU	3-isopropylmalate dehydratase OS=Rhizomucor pusillus GN=LEUA PE=3 SV=1	100	0	tr|B8CEE0|B8CEE0_THAPS	3-isopropylmalate dehydratase OS=Thalassiosira pseudonana GN=LEU2 PE=3 SV=1	gi|428777661|ref|YP_007169448.1|	641	0	COG0065	Homoaconitase/3-isopropylmalate dehydratase large subunit	E	Amino acid transport and metabolism	K01702|1|0.0|900|mis:MICPUN_96879| 3-isopropylmalate dehydratase [EC:4.2.1.33]	GO:0009098//leucine biosynthetic process	GO:0003861//3-isopropylmalate dehydratase activity;GO:0051539//4 iron, 4 sulfur cluster binding	GO:0009316//3-isopropylmalate dehydratase complex
37	EED91832.1	predicted protein, partial [Thalassiosira pseudonana CCMP1335]	55692.2	0.03	1	3	XP_002290080.1;EJK49876.1	0.74	3	0.001	-0.2	EED91832.1	MSSDEEDADDDEFDTKNNSDEDEESDDEMEVERQSKLIDAEMLAEQEEAEVEMRRTIAQQTSVYHLPTAEEIAEDENRVVPPSELRARIEDVLEVLADFKTRREPGRSRSDYIERLAQDMAELFGYLQELVDYFLSMFGPNECLEFLEASDKPRPLVVRVNTLKARRKDLAAALMKRGVRLDPLAPWSKVGLKIYESTVPIGATPEYLAGHYMLQSAASMCPVMALGPQPGDRVLDMSAAPGGKTSYVSQLMKNKGVVIANDLKPERQKATVANLHRLGVRNVVTCVYDGRKIGNQLRNSFDRILLDAPCSGLGVISRDPSVKVQRTIPDVQRCAHLQKELLLAAIDALNAKSKKGGGCMVYSTCSVAVAENEEVVNYLLSKRDVKLVETGLDFGKPGF…	100	0	gi|224000816|ref|XP_002290080.1|	predicted protein [Thalassiosira pseudonana CCMP1335]	57.42	4e-140	sp|O94268|NOP2_SCHPO	25S rRNA (cytosine-C(5))-methyltransferase nop2 OS=Schizosaccharomyces pombe (strain 972 / ATCC 24843) GN=nop2 PE=1 SV=1	100	0	tr|B8C1V6|B8C1V6_THAPS	Uncharacterized protein (Fragment) OS=Thalassiosira pseudonana GN=THAPSDRAFT_34006 PE=3 SV=1	gi|18977629|ref|NP_578986.1|	232	5e-71	COG0144	16S rRNA C967 or C1407 C5-methylase, RsmB/RsmF family	J	Translation, ribosomal structure and biogenesis	K14835|1|8e-148|440|adu:107464593| ribosomal RNA methyltransferase Nop2 [EC:2.1.1.-]	GO:0006364//rRNA processing;GO:0032259//methylation	GO:0008757//S-adenosylmethionine-dependent methyltransferase activity;GO:0003723//RNA binding	-
38	XP_002286781.1	THAPSDRAFT_260934 [Thalassiosira pseudonana CCMP1335]	42504.6	0.023	4	4	EED96422.1;EED96423.1;XP_002286782.1;EJK66011.1	1.35	8	0.005	1.4	XP_002286781.1	MEGWTNQHYDAKTDSGILTAKDGSLISLHHYSKDPLRLTPATTSLNYGTTIWEGLACRRSPTSNKALVFRPQKNHERFVNGAHAMCLPPPSYELFMRGLQLVIQNNIHLLPPSPTVDPETGVPEGGAKLYIRPMLMGSGQQLGLHASPQISLLYYVSPTGSYFQGKAMGGLKLHLERRRCRAARGGLGSVKCSGNYAVTMRPLLDAKKLGFDDNLYLELDTYQSSLHDAILQELSAANIFLVLKSGEIVTPSLKRGTILPGVTRDSVLTLARDDGDIKVTVSERDVKVKDLLDATEVFITGTAAEVVPVQSIATSPRPKDELEDGYDDSFSVSFTHGQSGGGPVTTKLLNMLREVMAEKRTCEATKDWLCDVYETPEGFQKGGSHN	100	0	gi|223994195|ref|XP_002286781.1|	Hypothetical protein THAPSDRAFT_260934 [Thalassiosira pseudonana CCMP1335]	38.73	4e-54	sp|Q9FYA6|BCAT5_ARATH	Branched-chain-amino-acid aminotransferase 5, chloroplastic OS=Arabidopsis thaliana GN=BCAT5 PE=1 SV=1	100	0	tr|B8BQU4|B8BQU4_THAPS	Branched-chain-amino-acid aminotransferase (Fragment) OS=Thalassiosira pseudonana GN=THAPSDRAFT_260934 PE=3 SV=1	gi|42522679|ref|NP_968059.1|	162	8e-45	COG0115	Branched-chain amino acid aminotransferase/4-amino-4-deoxychorismate lyase	EH	Amino acid transport and metabolism;Coenzyme transport and metabolism	K00826|1|4e-56|192|mis:MICPUN_106230| branched-chain amino acid aminotransferase [EC:2.6.1.42]	GO:0009082//branched-chain amino acid biosynthetic process	GO:0052654//L-leucine transaminase activity;GO:0052655//L-valine transaminase activity;GO:0052656//L-isoleucine transaminase activity	-
39	EED88796.1	phosphoadenosine-phosphosulphate reductase [Thalassiosira pseudonana CCMP1335]	49384.2	0.192	6	33	XP_002293787.1	1.24	14	0.002	-1.1	EED88796.1	MKFIALFALISTTSVSGFAPSTRAMVNSRTTSTAVISQSSTSLQMADDAKIFDQESFIAESKEMRLKHLEEQAMFALKIAVENYGNAVFPNALIAGDSVITHLLHRMGYLKDGQAKVMVVDTFHLFPETMEFLREIEDFYGFKAEIFCAEGVPVGDKAAYDKKYGADLWKEDIEQYDKVCKVEPFQRGLKTLNTDCMINGRTRWQGFERAWIDQFENAPIGGGLAKCNPIAYWTLEDTFDYIAKYEVPHHPLHAKGYPSIGDAKDTIPIPEDGSTRFVNFKFEGDKTPWLDYASERKGRFVGLANKDGSTKTECGIHVAGAERTFDRDLWESGAVKNIESNDEALEIIKSGKEAIVAVYAPWCQFCQGMEEEFAKYAESAGVPVYKFRGDEERDFVSAN…	100	0	gi|224009658|ref|XP_002293787.1|	phosphoadenosine-phosphosulphate reductase [Thalassiosira pseudonana CCMP1335]	32.27	1e-28	sp|P56859|MET16_EMENI	Phosphoadenosine phosphosulfate reductase OS=Emericella nidulans (strain FGSC A4 / ATCC 38163 / CBS 112.46 / NRRL 194 / M139) GN=sA PE=3 SV=3	100	0	tr|B8CCL3|B8CCL3_THAPS	Phosphoadenosine-phosphosulphate reductase OS=Thalassiosira pseudonana GN=THAPSDRAFT_24887 PE=4 SV=1	gi|428206895|ref|YP_007091248.1|	136	1e-35	COG0175	3'-phosphoadenosine 5'-phosphosulfate sulfotransferase (PAPS reductase)/FAD synthetase or related enzyme	EH	Amino acid transport and metabolism;Coenzyme transport and metabolism	K00390|1|2e-91|283|ppp:PHYPADRAFT_123215| phosphoadenosine phosphosulfate reductase [EC:1.8.4.8 1.8.4.10]!K05907|5|5e-30|124|csv:101220567| adenylyl-sulfate reductase (glutathione) [EC:1.8.4.9]	GO:0045454//cell redox homeostasis;GO:0008152//metabolic process	GO:0003824//catalytic activity	-
40	XP_002292881.1	indole-3-glycerol-phosphate synthase [Thalassiosira pseudonana CCMP1335]	30656	0.044	1	2	EED90077.1	0.72	9	0.002	0.5	XP_002292881.1	MRASDPSLAIKGLCLNPTDYTASQSTAGGAYTGGTKLIKICGLTQPDDALVACRAGANLLGVIFAEKSKRRVSVEQAKAIVDAVRKFGERSNRVDIETKENGAAVSSLVSKSIALERAAIRPSVVGVFQNQPLEFVKEMVEVCGLDLVQLHGSEGMEAANAKNFSVPALRVVDIELGGGSGEGKSADIAAAILEKITSDPIAILLDTSIKGEKGGGGTGQAFDWTIATSIQNMGLPVIIAGGLTPENIGEAVLNVKPWGVDVAGGVEASAGVKDTEKVEKFVGGAKRAAVEASKGF	100	0	gi|224007843|ref|XP_002292881.1|	indole-3-glycerol-phosphate synthase [Thalassiosira pseudonana CCMP1335]	39.93	1e-40	sp|P24920|TRPC_PHYPR	Tryptophan biosynthesis protein TRP1 OS=Phytophthora parasitica GN=TRP1 PE=3 SV=1	100	0	tr|B8C9P1|B8C9P1_THAPS	Indole-3-glycerol-phosphate synthase OS=Thalassiosira pseudonana GN=THAPSDRAFT_36525 PE=3 SV=1	gi|57233822|ref|YP_182185.1|	140	5e-39	COG0135	Phosphoribosylanthranilate isomerase	E	Amino acid transport and metabolism	K01817|1|7e-16|80.5|bpg:Bathy13g00220| phosphoribosylanthranilate isomerase [EC:5.3.1.24]	GO:0000162//tryptophan biosynthetic process	GO:0004640//phosphoribosylanthranilate isomerase activity	-
41	XP_002294945.1	hypothetical protein THAPSDRAFT_26051 [Thalassiosira pseudonana CCMP1335]	46028.7	0.137	4	14	EED87725.1	0.69	18	0.002	-0.4	XP_002294945.1	MKLSIALLSMAATATAFAPSLTTPSRTTSLSMVNPLEIRTGKAQLDHSVIDRFNALPYPADKVLAEYVWVDAKGECRSKTRTLPVARTTAVDNLPRWNFDGSSTGQAPGDDSEVILRPCRIFKDPFRPRNDGVDNILVMCDTYTPAGEALPTNTRAIAAKAFEGKEDEEIWFGLEQEFTLFNLDQRTPLGWPKGGVPARAQGPYYCSVGPENSFGRAITDTMYRACLYAGIEISGTNGEVMPGQQEYQVGPCVGIDAGDQLQMSRYILQRVCEEFQVYCTLHPKPIVEGDWNGAGMHTNVSTKSMREEGGLEVIKKAIYKLGAKHQEHIAVYGEGNELRLTGKHETASIDQFSFGVANRGASVRIGRDTEAEGKGYFEDRRPSSNADPYLVTGKIMATI…	100	0	gi|224012585|ref|XP_002294945.1|	hypothetical protein THAPSDRAFT_26051 [Thalassiosira pseudonana CCMP1335]	62.23	2e-156	sp|Q42624|GLNAC_BRANA	Glutamine synthetase, chloroplastic OS=Brassica napus GN=GLN2 PE=2 SV=1	100	0	tr|B8CFZ9|B8CFZ9_THAPS	Glutamine synthetase OS=Thalassiosira pseudonana GN=GLNA PE=3 SV=1	gi|470180041|ref|YP_007566085.1|	307	9e-101	COG0174	Glutamine synthetase	E	Amino acid transport and metabolism	K01915|1|9e-158|455|egr:104425029| glutamine synthetase [EC:6.3.1.2]	GO:0009750//response to fructose;GO:0010155//regulation of proton transport;GO:0006098//pentose-phosphate shunt;GO:0009749//response to glucose;GO:0010218//response to far red light;GO:0009744//response to sucrose;GO:0006833//water transport;GO:0010114//response to red light;GO:0009651//response to salt stress;GO:0007568//aging;GO:0006542//glutamine biosynthetic process;GO:0006972//hyperosmotic r…	GO:0004356//glutamate-ammonia ligase activity;GO:0005524//ATP binding	GO:0009941//chloroplast envelope;GO:0048046//apoplast;GO:0022626//cytosolic ribosome;GO:0009570//chloroplast stroma;GO:0009535//chloroplast thylakoid membrane;GO:0005739//mitochondrion
Table S3	Regulation of carbon metabolic proteins in lower temperature cells
S. No	Protein_ID	Description	Mass	Protein_Coverage	Uniq_Pep_Num	Uniq_Spec_Num	Sameset	Ratio_Control-VS-Low temperature	Quant_Num_Control-VS-Low temperature	Qvalue_Control-VS-Low temperature	Fold change	Protein_ID	Protein_Seqence	NCBInr Identity	NCBInr E-value	NCBInr Accession	NCBInr Description	Swissprot Identity	Swissprot E-value	Swissprot Accession	Swissprot Description	Tremble Identity	Tremble E-value	Tremble Accession	Tremble Description	Protein_or_Domain	COG Score	COG E-value	COG ID	COG Function-Description	COG Code	COG Function-Categories	KEGG(ko_id|rank|evalue|score|identity|ko_definition)	GO Biological_Process	GO Molecular_Function	GO Cellular_Component
1	XP_002287200.1	transketolase [Thalassiosira pseudonana CCMP1335]	72043.2	0.139	6	47	EED94643.1	2.116	45	0.002	-1.1	XP_002287200.1	MAALATAANEARGLAMDSIAAAHSGHMGLPLGCAEIGSILYGSQMQYNPKDTQWINRDRFILSAGHGSMFLYSWLNLAGFDLPMEEVKNFRQHHSMTPGHPEFPNSEHNTPGIECTTGPLGAGVSNAVGFAVSEKMAAARYNTDEHTIFDHHIYALAGDGCFQEGVSAEAAQFAAHEKLDNLIVLYDSNEVTLDKMAEYTQSEDIIKRYEAYGWETYEIDGHDLAVVEETIAAAKASNNGKPKFIKCNTIIGKGMEETEGTNAAHGEAGVPYVDKARASIGLPEEKWFVSEGTRDFFKGVQEKNTKTYDEWQATYAAWKEANPALATELENAVADVTPSAEEMLASIPEMGDAAEATRVSGFKVIQEIAKQVPQYISGSADLHGSTRNYINDGGNFGAG…	100	0	gi|223995033|ref|XP_002287200.1|	transketolase [Thalassiosira pseudonana CCMP1335]	57.34	0	sp|Q556J0|TKT_DICDI	Transketolase OS=Dictyostelium discoideum GN=tkt-1 PE=1 SV=1	100	0	tr|B8BTR4|B8BTR4_THAPS	Transketolase OS=Thalassiosira pseudonana GN=TKT2 PE=3 SV=1	gi|294056470|ref|YP_003550128.1|	813	0	COG0021	Transketolase	G	Carbohydrate transport and metabolism	K00615|1|8e-167|499|mus:103998561| transketolase [EC:2.2.1.1]	GO:0008152//metabolic process	GO:0004802//transketolase activity	-
2	AAZ74654.1	ribulose-1,5-bisphosphate carboxylase/oxygenase large subunit, partial (chloroplast) [Porosira pseudodenticulata]	52295.4	0.286	2	4	-	1.904	3	0.032	-2.1	AAZ74654.1	MSQSVSERTRIKSDRYESGVIPYAKMGYWDAAYTVKDTDVLALFRITPQPGVDPVEAAAAVAGESSTATWTVVWTDLLTACERYRAKAYRVDPVPNSTDVYFAFIAYECDLFEEGSLSNLTASIIGNVFGFKAVAALRLEDMRIPHSYLKTFQGPATGIIVERERLNKYGTPLLGATVKPKLGLSGKNYGRVVYEGLKGGLDFLKDDENINSQPFMRWRERFLNCMEGINRASAATGEVKGSYLNVTAATMEEVYKRAEYARVVGSVVVMIDLVMGYTAIQSIALWARENDMLLHLHRAGNSTYARQKNHGINFRVICKWMRMSGVDHIHAGTVVGKLEGDPLMIKGFYDVLRLTELEVNLPFGIFFEMDWASLRRCMPVASGGIHCGQMHQLIHYLGD…	100	0	gi|329343220|gb|AEB91239.1|	ribulose-1,5-bisphosphate carboxylase/oxygenase large subunit (chloroplast) [Porosira glacialis]	96.59	0	sp|O98945|RBL_DETCO	Ribulose bisphosphate carboxylase large chain OS=Detonula confervacea GN=rbcL PE=3 SV=1	100	0	tr|F5GW03|F5GW03_9STRA	Ribulose bisphosphate carboxylase large chain OS=Porosira glacialis GN=rbcL PE=3 SV=1	gi|292493417|ref|YP_003528856.1|	752	0	COG1850	Ribulose 1,5-bisphosphate carboxylase, large subunit, or a RuBisCO-like protein	G	Carbohydrate transport and metabolism	K01601|1|0.0|814|cme:CymeCp013| ribulose-bisphosphate carboxylase large chain [EC:4.1.1.39]	GO:0019253//reductive pentose-phosphate cycle;GO:0009853//photorespiration;GO:0055114//oxidation-reduction process	GO:0016984//ribulose-bisphosphate carboxylase activity;GO:0004497//monooxygenase activity;GO:0000287//magnesium ion binding	GO:0009507//chloroplast
3	ABF60377.1	ribulose-1,5-bisphosphate carboxylase/oxygenase large subunit, partial (chloroplast) [Skeletonema pseudocostatum]	54591.3	0.398	4	33	-	1.692	112	0.002	-1.8	ABF60377.1	MSQSVSERTRIKSDRYESGVIPYAKMGYWDAAYSVKDTDVLALFRITPQPGVDPVEAAAAVAGESSTATWTVVWTDLLTACERYRAKAYRVDPVPNASDQFFAFIAYECDLFEEASLANLTASIIGNVFGFKAVAALRLEDMRIPHSYLKTFQGPATGIIVERERMNKYGTPLLGATVKPKLGLSGKNYGRVVYEGLKGGLDFLKDDENINSQPFMRWRERFLNCMEGINRASAATGEVKGSYLNITASTMEEVYKRAEYAKAVGSIVVMIDLVMGYTAIQSIAYWARENDMLLHLHRAGNSTYARQKNHGINFRVICKWMRMSGVDHIHAGTVVGKLEGDPLMIKGFYDILRLTELEVNLPFGIFFEMDWASLRRCMPVASGGIHCGQMHQLIHYLGD…	100	0	gi|98990619|gb|ABF60377.1|	ribulose-1,5-bisphosphate carboxylase/oxygenase large subunit, partial (chloroplast) [Skeletonema pseudocostatum]	96.12	0	sp|O98945|RBL_DETCO	Ribulose bisphosphate carboxylase large chain OS=Detonula confervacea GN=rbcL PE=3 SV=1	100	0	tr|A8DP91|A8DP91_9STRA	Ribulose bisphosphate carboxylase large chain (Fragment) OS=Skeletonema pseudocostatum GN=rbcL PE=3 SV=1	gi|292493417|ref|YP_003528856.1|	781	0	COG1850	Ribulose 1,5-bisphosphate carboxylase, large subunit, or a RuBisCO-like protein	G	Carbohydrate transport and metabolism	K01601|1|0.0|842|cme:CymeCp013| ribulose-bisphosphate carboxylase large chain [EC:4.1.1.39]	GO:0019253//reductive pentose-phosphate cycle;GO:0009853//photorespiration;GO:0055114//oxidation-reduction process	GO:0016984//ribulose-bisphosphate carboxylase activity;GO:0004497//monooxygenase activity;GO:0000287//magnesium ion binding	GO:0009507//chloroplast
4	AFO84270.1	ribulose-1,5-bisphosphate carboxylase/oxygenase large subunit, partial (chloroplast) [Cyclotella striata]	36918.9	0.288	2	5	-	1.385	19	0.025	1.7	AFO84270.1	VKDTDVLALFRITPQPGVDPVEAAAAVAGESSTATWTVVWTDLLTACERYRAKAYRVDPVPNATDQYFAFIAYECDLFEEASLSNLTASIIGNVFGFKAVAALRLEDMRIPHSYLKTFQGPATGIVVERERLNKYGIPLLGATVKPKLGLSGKNYGRVVYEGLKGGLDFLKDDENINSQPFMRWRERFLNCLEGINRASAATGEVKGSYLNVTAATMEDVYKRAEFAKTIGSVIIMIDLVMGYTAIQSIAYWCRENDMILHLHRAGNSTYARQKNHGINFRVICKWMRMAGVDHIHAGTVVGKLEGDPLMIKGFYDVLRLTELEVNLPFG	100	0	gi|398372919|gb|AFO84270.1|	ribulose-1,5-bisphosphate carboxylase/oxygenase large subunit, partial (chloroplast) [Cyclotella striata]	96.06	0	sp|A0T0N6|RBL_THAPS	Ribulose bisphosphate carboxylase large chain OS=Thalassiosira pseudonana GN=rbcL PE=3 SV=1	100	0	tr|K9LSX0|K9LSX0_9STRA	Ribulose bisphosphate carboxylase large chain (Fragment) OS=Cyclotella striata GN=rbcL PE=3 SV=1	gi|292493417|ref|YP_003528856.1|	554	0	COG1850	Ribulose 1,5-bisphosphate carboxylase, large subunit, or a RuBisCO-like protein	G	Carbohydrate transport and metabolism	K01601|1|0.0|563|cme:CymeCp013| ribulose-bisphosphate carboxylase large chain [EC:4.1.1.39]	GO:0019253//reductive pentose-phosphate cycle;GO:0055114//oxidation-reduction process	GO:0016984//ribulose-bisphosphate carboxylase activity;GO:0004497//monooxygenase activity;GO:0000287//magnesium ion binding	GO:0009507//chloroplast
5	ABK20720.1	ribulose-1,5-bisphosphate carboxylase/oxygenase small subunit (chloroplast) [Thalassiosira pseudonana]	15985.6	0.647	3	37	YP_874497.1	1.47	37	0.002	1.2	ABK20720.1	MRLTQGCFSFLPDLTDAQIEKQVSYAMSKGWAMNVEWTDDPHPRNNYWELWGLPLFDIKDPATVMFELNEARKSCAAGYIRINAFDASYGVESCVMSFITNRPANEPGFYLDRTEGAGRQVIYSIKSYSVQSNPEGSRY	100	6e-103	gi|118411103|ref|YP_874497.1|	ribulose-1,5-bisphosphate carboxylase/oxygenase small subunit [Thalassiosira pseudonana]	94.96	2e-99	sp|O98948|RBS_THANO	Ribulose bisphosphate carboxylase small chain OS=Thalassiosira nordenskioeldii GN=rbcS PE=3 SV=1	100	1e-101	tr|A0T0N5|A0T0N5_THAPS	Ribulose-1,5-bisphosphate carboxylase/oxygenase small subunit OS=Thalassiosira pseudonana GN=rbcS PE=4 SV=1	gi|339322653|ref|YP_004681547.1|	195	1e-63	COG4451	Ribulose bisphosphate carboxylase small subunit	G	Carbohydrate transport and metabolism	K01602|1|2e-63|193|ccp:CHC_955| ribulose-bisphosphate carboxylase small chain [EC:4.1.1.39]	GO:0019253//reductive pentose-phosphate cycle;GO:0009853//photorespiration;GO:0055114//oxidation-reduction process	GO:0016984//ribulose-bisphosphate carboxylase activity;GO:0004497//monooxygenase activity	GO:0009507//chloroplast
6	EED92490.1	pyruvate phosphate dikinase [Thalassiosira pseudonana CCMP1335]	103173	0.025	2		XP_002290738.1	0.159	4	0.0008259	-2.4	EED92490.1	MVINSQYIYPFGGSAPKPTVDPDKQIVGGKGLGLQVMFKIGVDVPPGFTLTTPLCQVYAKQNDLPADVWKGVRENVRRIEIDMEKEFGSNENPLLFSCRSGAAMSMPGMMDTVLNIGLNDITVDGLAKATGNDRFAWDSYRRLLDMFGEVVLGISHEDFEKRFDKVKEAANAKSDVDLGVEDLKKLCDEYKQVYLEEGKVFPMDPYEQLYACVKAVFGSWMTPRAVKYREINNIKNLIGTATNIQTMVFGNMGDDSGTGVAFSRNPSTGENLMYGEYLINAQGEDVVAGIRTPQPISQMQEVLPDAYAKFLENVDKLEHYFKDMQDVEFTVEKGQLWMLQCRNGKRTGVAAIRIATELVEEGICTKSEALLKVEPRHVEQLLHPTFSPEALKSVAYTEG…	100	0	gi|224002132|ref|XP_002290738.1|	pyruvate phosphate dikinase [Thalassiosira pseudonana CCMP1335]	53.42	0	sp|Q42910|PPDK_MESCR	Pyruvate, phosphate dikinase, chloroplastic OS=Mesembryanthemum crystallinum GN=PPD PE=2 SV=1	100	0	tr|B8C332|B8C332_THAPS	Pyruvate, phosphate dikinase OS=Thalassiosira pseudonana GN=PDK1_2 PE=3 SV=1	gi|268316505|ref|YP_003290224.1|	922	0	COG1080	Phosphoenolpyruvate-protein kinase (PTS system EI component in bacteria)	G	Carbohydrate transport and metabolism	K01006|1|0.0|930|gra:105777958| pyruvate, orthophosphate dikinase [EC:2.7.9.1]	GO:0016310//phosphorylation	GO:0050242//pyruvate, phosphate dikinase activity;GO:0016301//kinase activity;GO:0005524//ATP binding	-
7	EED92818.1	phosphoribulokinase [Thalassiosira pseudonana CCMP1335]	42515.5	0.072	2	6	XP_002289281.1	2.475	6	0.003	-1.3	EED92818.1	MKFLVASLIASASAFSTINTPTLRGNSALAALKDGEVPIVIGLAADSGCGKSTFMRRVTSTFGGETCGPLGGGFGNGGWETNTLVSDMATVICLDDYHLNDREGRKVSGLTALNTAEQKFDLMFEHVKALKEGKTIMKPIYNHVNGTLDTPEEIEPTPVIIIEGLHPFVDERVRELIDFSLYLDISPDVKLNWKIQRDMEERGHSLESIMASIEARKPDFDAFIEPQKKFADYVIEVLPTDLDKEDKKTLKVRAIQKKGVADFTPTYLFDEGSEIEWAPSADKLSSPAPGIKLSYKQEQYFGADVAVVEMDGTFDNIQELVYVESNLGNTNSKFYGEVTQAMLSLADSPGSNNGTGLMQTLAAFAIRELYNKKSAAAKLAATKETAASA	100	0	gi|223999217|ref|XP_002289281.1|	phosphoribulokinase [Thalassiosira pseudonana CCMP1335]	63.2	2e-139	sp|P26302|KPPR_WHEAT	Phosphoribulokinase, chloroplastic OS=Triticum aestivum PE=2 SV=1	100	0	tr|B8BZ40|B8BZ40_THAPS	Phosphoribulokinase OS=Thalassiosira pseudonana GN=PRK1 PE=3 SV=1	gi|428204219|ref|YP_007082808.1|	404	5e-139	COG0572	Uridine kinase	F	Nucleotide transport and metabolism	K00855|1|6e-143|414|bpg:Bathy06g04980| phosphoribulokinase [EC:2.7.1.19]	GO:0005975//carbohydrate metabolic process;GO:0016310//phosphorylation	GO:0008974//phosphoribulokinase activity;GO:0005524//ATP binding	-
8	EJK47539.1	hypothetical protein THAOC_33731, partial [Thalassiosira oceanica]	103578	0.018	1	-	1.43	0.205	4	0.01722	-0.9	EJK47539.1	VSSSDDEALLRSDVRTMGALLGDAISQHHGPEVFEKIEALRSMAKASRLAEADAGGSRLGPMVDFVSGLSEPELVVISRAFAHFLGIANAAEAHQRCRRLAEDSRREGAEGHLGALHETKRDSTAGVLAGFLDGGDGVRRDRAHRAPHAGQPPHAPREARAGPDRAHRGRPDPAVGHALRAEGARRRAPAGDRVDMADGRGVEGQAQSAERGREGDAGPRDGALGGPAEVPEEARRDHEGQDGGGVRTAAQGESVQVRVVDGRRSRRGAFDDVCNLALTAHTRLAGTKGNPNVVADVTREVTLTNRLKAAELFEKDVRELMSLISGNPPRGMNDTCQTESEAMDKVRARAGVESRAPFRSYLNPVATKLGKTADWARQELSKLQGEATPANTILPEDVY…	100	0	gi|397570934|gb|EJK47539.1|	hypothetical protein THAOC_33731, partial [Thalassiosira oceanica]	44.01	2e-163	sp|Q6F6Q6|CAPP_ACIAD	Phosphoenolpyruvate carboxylase OS=Acinetobacter baylyi (strain ATCC 33305 / BD413 / ADP1) GN=ppc PE=3 SV=1	100	0	tr|K0R6G7|K0R6G7_THAOC	Uncharacterized protein (Fragment) OS=Thalassiosira oceanica GN=THAOC_33731 PE=4 SV=1	gi|507524157|ref|YP_008045770.1|	511	1e-165	COG2352	Phosphoenolpyruvate carboxylase	C	Energy production and conversion	K01595|1|8e-163|505|brp:103866650| phosphoenolpyruvate carboxylase [EC:4.1.1.31]	GO:0006107//oxaloacetate metabolic process;GO:0015977//carbon fixation;GO:0006099//tricarboxylic acid cycle	GO:0000287//magnesium ion binding;GO:0008964//phosphoenolpyruvate carboxylase activity	-
9	pdb|3BOJ|A	Chain A, Carbonic Anhydrase From Marine Diatom Thalassiosira Weissflo Cadmium Bound Domain 1 Without Bound Metal (Cdca1-R1)	23179.6	0.047	2	2	pdb|3BOH|A;pdb|3BOH|B;AAX08632.1	0.8	4	0.203	-1.1	pdb|3BOJ|A	SHMSLTPDQIVAALQERGWQAEIVTEFSLLNEMVDVDPQGILKCVDGRGSDNTQFCGPKMPGGIYAIAHNRGVTTLEGLKQITKEVASKGHVPSVHGDHSSDMLGCGFFKLWVTGRFDDMGYPRPQFDADQGAKAVENAGGVIEMHHGSHAEKVVYINLVENKTLEPDEDDQRFIVDGWAAGKFGLDVPKFLIAAAATVEMLGGPKKAKIVIP	100	2e-158	gi|166007358|pdb|3BOH|A	Chain A, Carbonic Anhydrase From Marine Diatom Thalassiosira Weissflo Cadmium Bound Domain 1 With Acetate (Cdca1-R1)	-	-	-	-	100	4e-138	tr|Q50EL4|Q50EL4_THAWE	Cadmium-specific carbonic anhydrase (Fragment) OS=Thalassiosira weissflogii GN=cdca1 PE=1 SV=1	-	-	-	-	-	-	-	-		GO:0046872//metal ion binding	-
10	EED95846.1	glyceraldehyde-3-phosphate dehydrogenase precursor, partial [Thalassiosira pseudonana CCMP1335]	39942.8	0.349	4	17	XP_002286205.1	1.592	15	0.002	0.7	EED95846.1	KFIAALSLVAGASAYAPSAFSGSSLRATSNGSSMSMATGMGVNGFGRIGRLVTRIMMEDDDIKLSAINAGSATPDYMAYQYKYDTIHGIAKGTVDIDGDFLVLNGEKIQTSRCRDPKEVGWGALGADYVCESTGVFLTKEKAQAIIDGGAKKVIYSAPAKDDSQTIVMGVNQGEYDGSEDFISCASCTTNGLAPMVKAIHDEFDIQEALMTTVHAMTATQAVVDSSSRKDWRGGRAASGNIIPSSTGAAKAVTKVIPSLQGKLTGMAFRVPTIDVSVVDLTCKLGKATTYEEICAVIKAKSEGEMKGILGYCDEPLVSTDFESDSRSSIFDAGAGIMLNPTFVKLVAWYDNEWGYSGRVVDLMKHVAAVDAKIAA	100	0	gi|223993043|ref|XP_002286205.1|	glyceraldehyde-3-phosphate dehydrogenase precursor [Thalassiosira pseudonana CCMP1335]	71.63	3e-179	sp|O09452|G3PA_GUITH	Glyceraldehyde-3-phosphate dehydrogenase, chloroplastic OS=Guillardia theta GN=GAPC1 PE=2 SV=1	100	0	tr|B8BQU2|B8BQU2_THAPS	Glyceraldehyde-3-phosphate dehydrogenase (Fragment) OS=Thalassiosira pseudonana GN=GAPD1 PE=3 SV=1	gi|343087277|ref|YP_004776572.1|	413	5e-143	COG0057	Glyceraldehyde-3-phosphate dehydrogenase/erythrose-4-phosphate dehydrogenase	G	Carbohydrate transport and metabolism	K00134|1|2e-144|416|sita:101785151| glyceraldehyde 3-phosphate dehydrogenase [EC:1.2.1.12]	GO:0019253//reductive pentose-phosphate cycle;GO:0006006//glucose metabolic process;GO:0055114//oxidation-reduction process	GO:0051287//NAD binding;GO:0050661//NADP binding;GO:0004365//glyceraldehyde-3-phosphate dehydrogenase (NAD+) (phosphorylating) activity;GO:0043891//glyceraldehyde-3-phosphate dehydrogenase (NAD(P)+) (phosphorylating) activity;GO:0047100//glyceraldehyde-3-phosphate dehydrogenase (NADP+) (phosphorylating) activity	GO:0009507//chloroplast
11	EJK54495.1	hypothetical protein THAOC_25871, partial [Thalassiosira oceanica]	66395.2	0.075	2	3	-	1.885	3	0.035	0.9	EJK54495.1	LAPPPPLARRAGGLPPLSHGPLATIAFICSPAAAAAGQPETREVFSMGGVENTAAWKALEAHYASMSTTHVKDLFAADPDRFNKHSMKFEDLLLDYSKNCVTEETMGLLYKLAEETDVSGLAKKMYSGEKINLTEGRAVLHVALRNQSNTPIYVDGKNVMPEVNEVLGKIKVFVENVRSGAWKGHTGKSIETVVNIGIGGSDLGPVMVTEALKPYCKRDLKMLFCSNVDGTHIAEILKQCDPETTLCLIASKTFTTQETMTNAGTAKKWLLDYYKGDESCVAKHFAALSTNAAAVSAFGIDTNNMFGFWDWVGGRYSLWSAIGTPIALSLGFDAWMEMHAGAHAMDQHFLNADPKENLPMTLALIGIWYNNFHKAESLAILPYDQYMHRFAAYFQQGDM…	100	0	gi|397589021|gb|EJK54495.1|	hypothetical protein THAOC_25871, partial [Thalassiosira oceanica]	66.91	0	sp|B5XY03|G6PI_KLEP3	Glucose-6-phosphate isomerase OS=Klebsiella pneumoniae (strain 342) GN=pgi PE=3 SV=1	100	0	tr|K0RMX2|K0RMX2_THAOC	Glucose-6-phosphate isomerase (Fragment) OS=Thalassiosira oceanica GN=THAOC_25871 PE=3 SV=1	gi|512550233|ref|YP_008088139.1|	754	0	COG0166	Glucose-6-phosphate isomerase	G	Carbohydrate transport and metabolism	K01810|1|7e-163|479|ccp:CHC_T00009370001| glucose-6-phosphate isomerase [EC:5.3.1.9]	GO:0006096//glycolytic process;GO:0006094//gluconeogenesis	GO:0004347//glucose-6-phosphate isomerase activity	GO:0005737//cytoplasm
12	ACI64800.1	acetyl-coa carboxylase [Thalassiosira pseudonana CCMP1335]	228702	0.06	2	5	XP_002296083.1	1.36	4	0.0468	1.7	ACI64800.1	MAPRRYAVAAAALLASASVTAFAPQQSAFTPQALTSSPNRNIFGALKSAFFPNNDVATSTSLWAATLDETTASSSSSGTTQTVEEYVKARGGNRPIRKVLIANNGMAATKSILSMRQWAYMEFGDERAIQFVAMATPEDLKANAEFVRLADSFVEVPGGKNLNNYANVDVITKIAQEQGVDAVWPGWGHASENPKLPNTLDKMGIKFIGPTGPVMSVLGDKIAANILAQTAKVPSIPWSGSFGGPDDGPLQANLNAEGTIPQEIFEKGLVRSADEAVVAANKIGWENGIMIKASEGGGGKGIRFVDNEADLRNAYVQVSNEVIGSPIFLMQLCKNARHIEVQIVGDQHGNAVALNGRDCSTQRRFQKIFEEGPPVIVPPETFHEMELAAQRLTQNIGYQ…	100	0	gi|224004864|ref|XP_002296083.1|	acetyl-coa carboxylase [Thalassiosira pseudonana CCMP1335]	46.68	0	sp|Q54J08|ACAC_DICDI	Acetyl-CoA carboxylase OS=Dictyostelium discoideum GN=accA PE=3 SV=1	100	0	tr|B5YMF5|B5YMF5_THAPS	Acetyl-coa carboxylase OS=Thalassiosira pseudonana GN=ACC PE=4 SV=1	gi|556569737|ref|YP_008738162.1|	333	3e-90	COG4799	Acetyl-CoA carboxylase, carboxyltransferase component	I	Lipid transport and metabolism	K11262|1|0.0|2045|bpg:Bathy08g01850| acetyl-CoA carboxylase / biotin carboxylase 1 [EC:6.4.1.2 6.3.4.14]	GO:0006633//fatty acid biosynthetic process	GO:0046872//metal ion binding;GO:0005524//ATP binding;GO:0004075//biotin carboxylase activity;GO:0003989//acetyl-CoA carboxylase activity	-
13	XP_002290145.1	phosphoenolpyruvate carboxykinase [Thalassiosira pseudonana CCMP1335]	68511.6	0.04	3	2	EED91897.1;BAO52743.1	1.45	4	0.2487	2.3	XP_002290145.1	MIATQSRIFLRTATGIGGKTALKALIARAGTSASYASVSQPTGVKAGAAAIAGRTTKHVAYKSAVAHSPADDPLRGNYNSTVTYEGDDACSKAGIDALGITGPNIIFKNQTFEQLFRHEVANGEGKVADAEYGDTFCVDTGKFTGRSPKDKWIVRNVGSESEANIDWGKVNQPTSPEVFDELYEKAVKHFNSLDKAYVFDGFCGANPKSQRKIRFVHEQAWQQHFVTNMFIRANEESDLDGFDPDFTVINACSQVVEDWERHGLNSEVACVFNVEKKCAVIFGTWYGGENKKGIFSLMNYWLPMQGQFPMHCSANVGKAGDSALFFGLSGTGKTTLSADPHRALIGDDEHGWDEDGVFNFEGGCYAKTINLSEETEPDIYRAIHRDAMLENVALKEDGG…	100	0	gi|224000946|ref|XP_002290145.1|	phosphoenolpyruvate carboxykinase [Thalassiosira pseudonana CCMP1335]	59.77	0	sp|A7H3B9|PCKA_CAMJD	Phosphoenolpyruvate carboxykinase (ATP) OS=Campylobacter jejuni subsp. doylei (strain ATCC BAA-1458 / RM4099 / 269.97) GN=pckA PE=3 SV=1	100	0	tr|B8C274|B8C274_THAPS	Phosphoenolpyruvate carboxykinase OS=Thalassiosira pseudonana GN=PCK1 PE=3 SV=1	gi|317050643|ref|YP_004111759.1|	631	0	COG1866	Phosphoenolpyruvate carboxykinase, ATP-dependent	C	Energy production and conversion	K01610|1|1e-154|462|cvr:CHLNCDRAFT_56532| phosphoenolpyruvate carboxykinase (ATP) [EC:4.1.1.49]	GO:0006094//gluconeogenesis;GO:0016310//phosphorylation	GO:0016301//kinase activity;GO:0004612//phosphoenolpyruvate carboxykinase (ATP) activity;GO:0005524//ATP binding	GO:0005737//cytoplasm
14	XP_002295597.1	1-deoxy-D-xylulose 5-phosphate reductoisomerase [Thalassiosira pseudonana CCMP1335]	51872.5	0.147	8	9	ACI64314.1	1.21	4	0.5927	1.1	XP_002295597.1	MKLSLAFSTILLSQSSAFTTLTSTKSTTTTTSSSLNVFSPPGSAGTGAGWIDPSAPVNTPESLQKTLSESLKGSTFQKRISILGSTGSIGTQTLDIVDACPDNFVVDALSAGNNAELMCEQVLKYKPKVASLGTPEAAKKLKELLVKAGCTDMPEIVHGAEGIVEAATVSTADTVVTGIVGAAGLLPTIEAIKLGKDIALANKETLISGGPVINPLVEKHGINMLPADSEHSAIFQCLQGVPPGGLRRVILTASGGAFRDLSKDELFEMCERDPRAVQKKATTHPNWDMGAKITLDSATMMNKGLEVIEAHYLFGASYDDIDIVIHPQSIVHSMVETQDTSCIAQLGWADMRLPIVYSVSWPHRLKMPYKPLNLAEIGSLTFKAPDVEKYPCIRLAYEA…	100	0	gi|224011645|ref|XP_002295597.1|	1-deoxy-D-xylulose 5-phosphate reductoisomerase [Thalassiosira pseudonana CCMP1335]	56.79	2e-148	sp|Q3MDL2|DXR_ANAVT	1-deoxy-D-xylulose 5-phosphate reductoisomerase OS=Anabaena variabilis (strain ATCC 29413 / PCC 7937) GN=dxr PE=3 SV=1	100	0	tr|B5YLY6|B5YLY6_THAPS	1-deoxy-D-xylulose 5-phosphate reductoisomerase OS=Thalassiosira pseudonana GN=DXR1 PE=3 SV=1	gi|434387498|ref|YP_007098109.1|	474	1e-164	COG0743	1-deoxy-D-xylulose 5-phosphate reductoisomerase	I	Lipid transport and metabolism	K00099|1|2e-156|455|mpp:MICPUCDRAFT_47613| 1-deoxy-D-xylulose-5-phosphate reductoisomerase [EC:1.1.1.267]	GO:0055114//oxidation-reduction process;GO:0016114//terpenoid biosynthetic process	GO:0046872//metal ion binding;GO:0030604//1-deoxy-D-xylulose-5-phosphate reductoisomerase activity;GO:0070402//NADPH binding;GO:0016853//isomerase activity	-
15	EJK59365.1	hypothetical protein THAOC_20426 [Thalassiosira oceanica]	39223.6	0.036	4	11	-	1.23	4	0.6585	0.7	EJK59365.1	MVGGADVHSDEPDNRGINDGSGLIEVPAGINEGRKCVSRDESLTEILITRGLSEANLISSIVSLGEASAQIAAILENYVKHEYAGTQNSSGDDQLKLDIDCDNAVFHAIRGSGTFVTAASEETPVETDVSSPSMKDEEFYSVGFDPLDGSSIIDANFSVGSIFGIWPGKGLLGRRGREQVASVVSLYGPRTTLMIALPAKSRDDDKGDLAFEVTLVKDRSLWELSRGDVKLKPSKKVFAPGNLRAVNDNEKYDSLVKHWIADRYTLRYSGGMVPDVYHMFAKSGGVFSNVSSEKARAKLRLLYEVAAIGLMVECADGATTHEFEDISVLDVEIDDLDKRLGVCFGSKDEVAKYRKFMFE	100	0	gi|397606576|gb|EJK59365.1|	hypothetical protein THAOC_20426 [Thalassiosira oceanica]	42.5	1e-71	sp|P46285|S17P_WHEAT	Sedoheptulose-1,7-bisphosphatase, chloroplastic OS=Triticum aestivum PE=2 SV=1	100	0	tr|K0S2A1|K0S2A1_THAOC	Uncharacterized protein OS=Thalassiosira oceanica GN=THAOC_20426 PE=4 SV=1	gi|118580196|ref|YP_901446.1|	154	3e-42	COG0158	Fructose-1,6-bisphosphatase	G	Carbohydrate transport and metabolism	K01100|1|5e-74|238|nnu:104597004| sedoheptulose-bisphosphatase [EC:3.1.3.37]	GO:0016051//carbohydrate biosynthetic process	GO:0042578//phosphoric ester hydrolase activity	GO:0009536//plastid
16	XP_002294247.1	predicted protein [Thalassiosira pseudonana CCMP1335]	64104.7	0.032	2	3	EED88602.1;EED88623.1;XP_002294268.1	1.51	4	0.03082	0.2	XP_002294247.1	MTPKLTQKESGKVIPDYILDQCAKHPNKIFLTQPMGGDAMNVKNWTFAEFLSESKKMAAHIESMALPVPSQIAIMSKNCAWWLMADLAIMMTGHVGVPIYPTLTAETTKYTLEHSESKLLFVGKLDEHPWNEMKKGIPEGMKCISFPMCPVGLDYDKWEDLTGKAEEIKEVKKRTGEEMATIIYTSGSTGVPKGVMLSFDAMTEPTFGLVETLHVTERDRYLSYLPVSHGMERWIGECVPFVSGVHVFFADSLATFVQDLGRCKPTVFLSVPRLWTKFQQGVFKKMPPEKLQKLLKIPLISYLVKKKLLKALGLECVRYAGSGSAPLPPDLLSWYRNLGLELLEGYGMTENFNYSHITKPGRGRVGYVGEPHPGVVQRIAADGELQIKTPGMMMGYYKN…	100	0	gi|224010579|ref|XP_002294247.1|	predicted protein [Thalassiosira pseudonana CCMP1335]	30.25	7e-58	sp|B2HGV4|FAC15_MYCMM	Long-chain-fatty-acid--CoA ligase FadD15 OS=Mycobacterium marinum (strain ATCC BAA-535 / M) GN=fadD15 PE=3 SV=1	100	0	tr|B8CDI0|B8CDI0_THAPS	Uncharacterized protein OS=Thalassiosira pseudonana GN=THAPSDRAFT_25022 PE=4 SV=1	gi|83647191|ref|YP_435626.1|	635	0	COG1022	Long-chain acyl-CoA synthetase (AMP-forming)	I	Lipid transport and metabolism	K01897|1|9e-54|198|cme:CYME_CML197C| long-chain acyl-CoA synthetase [EC:6.2.1.3]	GO:0008152//metabolic process	GO:0003824//catalytic activity	-
17	EJK66959.1	class II fructose-bisphosphate aldolase [Thalassiosira oceanica]	48489	0.074	4	7	-	1.759	7	0.045	0.8	EJK66959.1	MKLFGLALLLCGGVSGFTSVKGRAQNARTILRGGVSSDLGTPCEEECALESFPNMPESVHPGVLTGQAQVDLLNHAKENGESSSPGEHAATPFLLSIASRHLASNACLEAARRNDAPIIIQFSSGGSQFYGGKGLDNKNYAAAIAGAVSGAFHVRTMAEQYGVPVILHTDHCAKKLLPWIDGLLAASERYYEKHGEPLFSSHMIDLSEEPIEENIDICKDYLSRFSKIGMLLEMELGITGGEEDGVNNEDVPLEDLYSKPEEIYQVYDALTPISDQFTVAAAFGNVHGVYSPGNVKLEPKILTRAQAYISEKLGGSAPSDGKPVKFVFHGGSGSDVSDIQEAIGYGVIKMNIDTDTQWSYWEGIKNFESKYHDYLQGQIGNPEGPTKPNKKYYDPRECM…	100	0	gi|397623324|gb|EJK66959.1|	class II fructose-bisphosphate aldolase [Thalassiosira oceanica]	56.01	6e-125	sp|P44429|ALF_HAEIN	Fructose-bisphosphate aldolase OS=Haemophilus influenzae (strain ATCC 51907 / DSM 11121 / KW20 / Rd) GN=fba PE=3 SV=1	100	0	tr|K0SPN2|K0SPN2_THAOC	Class II fructose-bisphosphate aldolase OS=Thalassiosira oceanica GN=THAOC_12069 PE=4 SV=1	gi|319957102|ref|YP_004168365.1|	435	4e-150	COG0191	Fructose/tagatose bisphosphate aldolase	G	Carbohydrate transport and metabolism	K01624|1|5e-139|405|olu:OSTLU_94831| fructose-bisphosphate aldolase, class II [EC:4.1.2.13]	GO:0006096//glycolytic process	GO:0004332//fructose-bisphosphate aldolase activity;GO:0008270//zinc ion binding	-
18	EED93540.1	predicted protein [Thalassiosira pseudonana CCMP1335]	42999.3	0.285	8	40	XP_002290003.1	1.539	37	0.002	0.2	EED93540.1	MKLAAALLISASAVNAFAPAATHVRSSALNMATETAEKAFAKLPATVKPGVVTGKALTDLLDAAKEQGYAIPGVNIVGSNSINACMEAAAKYGGPIMVTFSKGGGQFIAGKSLSNEADSASIAGTIAGAKHVHEVAKLYGVPVVLHTDHCQKAWLPWIDGLLAASEEHFAATGEPLFSSHMLDLSEEPLEENISICKTYLEKFAKVGILLEFELGVTGGEEDGVDNSDVDSSRLYTQPEEVFYAYEQLSQVEGGAFTCAASFGNVHGVYAPGNVDLQPIILYNSQKYIQEKIGSDDDKPMKFVFHGGSGSSVEDIQYAIGAGVIKMNIDTDTQWAFWDGVRAYEAKYHDYLQGQIGNPEGDDKPNKKYYDPRMSLRAGEESMAARLVKAAEDLKCVNVLN	100	0	gi|224000661|ref|XP_002290003.1|	predicted protein [Thalassiosira pseudonana CCMP1335]	61.54	2e-159	sp|Q0PAS0|ALF_CAMJE	Fructose-bisphosphate aldolase OS=Campylobacter jejuni subsp. jejuni serotype O:2 (strain ATCC 700819 / NCTC 11168) GN=fba PE=1 SV=1	100	0	tr|B8C0L7|B8C0L7_THAPS	Uncharacterized protein OS=Thalassiosira pseudonana GN=THAPSDRAFT_270396 PE=4 SV=1	gi|319957102|ref|YP_004168365.1|	491	6e-173	COG0191	Fructose/tagatose bisphosphate aldolase	G	Carbohydrate transport and metabolism	K01624|1|3e-161|462|mis:MICPUN_104879| fructose-bisphosphate aldolase, class II [EC:4.1.2.13]	GO:0006096//glycolytic process	GO:0004332//fructose-bisphosphate aldolase activity;GO:0008270//zinc ion binding	-
19	EJK66007.1	hypothetical protein THAOC_13085 [Thalassiosira oceanica]	39860.5	0.405	2	36	-	1.218	34	0.003	0.3	EJK66007.1	MKFATAALLVSSASAYSFSGTSLKAASNGSSMSMATGMGVNGFGRIGRLVTRIMMEDDDCKLSAINAGSATPDYMAYQYKYDTIHGIAKGTVEVDGDFLVLNGEKIQTSRCRDPKEVGWGALGADYVCESTGVFLTKESAQSILDGGAKKVIYSAPAKDDSQTIVMGVNAEEYDGSENFISCASCTTNGLAPMVKAIHDEFDIQEALMTTVHAMTATQAVVDSSSRKDWRGGRAASGNIIPSSTGAAKAVTKVIPSLQGKLTGMAFRVPTIDVSVVDLTCKLGKETTYEEICAVIKAKSEGEMKGVLGYCDEPLVSTDFESDSRSSIFDAGAGIMLNPSFVKLVAWYDNEWGYSGRVVDLMKHVAAVDAKVAA	100	0	gi|397620938|gb|EJK66007.1|	hypothetical protein THAOC_13085 [Thalassiosira oceanica]	71.47	3e-175	sp|O09452|G3PA_GUITH	Glyceraldehyde-3-phosphate dehydrogenase, chloroplastic OS=Guillardia theta GN=GAPC1 PE=2 SV=1	100	0	tr|K0T6D7|K0T6D7_THAOC	Glyceraldehyde-3-phosphate dehydrogenase OS=Thalassiosira oceanica GN=THAOC_13085 PE=3 SV=1	gi|325278799|ref|YP_004251341.1|	407	7e-141	COG0057	Glyceraldehyde-3-phosphate dehydrogenase/erythrose-4-phosphate dehydrogenase	G	Carbohydrate transport and metabolism	K00134|1|2e-143|413|sita:101785151| glyceraldehyde 3-phosphate dehydrogenase [EC:1.2.1.12]	GO:0019253//reductive pentose-phosphate cycle;GO:0006006//glucose metabolic process;GO:0055114//oxidation-reduction process	GO:0051287//NAD binding;GO:0050661//NADP binding;GO:0004365//glyceraldehyde-3-phosphate dehydrogenase (NAD+) (phosphorylating) activity;GO:0043891//glyceraldehyde-3-phosphate dehydrogenase (NAD(P)+) (phosphorylating) activity;GO:0047100//glyceraldehyde-3-phosphate dehydrogenase (NADP+) (phosphorylating) activity	GO:0009507//chloroplast
20	EED93297.1	phosphoglycerate mutase [Thalassiosira pseudonana CCMP1335]	32540.7	0.041	3	6	XP_002289760.1	2.285	5	0.003	1.2	EED93297.1	MFSAARNAFSIASRTAVNNARVSPSTRCIAAFQTADKSTLVLVRHGESTWNLENKFTGWVDVPLSPKGHEETIEAGRVIKESGIVPDCAFTSLQKRAIRTLDHVLEETDLMWIPVTKSWKLNERHYGGLQGLDKQQTVDEYGKDQVLIWRRSYDIPPPPVDRSSPHHPSNDPRYASFDFPEEWTESLKTTLERVTPFFQEKIVPELKAGKTVLIAAHGNSLRALVKHLDNIGEDVIAELNIPTGTPLVYELDDDLKPIPQDGAMSPLTGRYLGDQDAIRARIEGVKNQTK	100	0	gi|224000175|ref|XP_002289760.1|	phosphoglycerate mutase [Thalassiosira pseudonana CCMP1335]	57.71	5e-99	sp|B3EN99|GPMA_CHLPB	2,3-bisphosphoglycerate-dependent phosphoglycerate mutase OS=Chlorobium phaeobacteroides (strain BS1) GN=gpmA PE=3 SV=1	100	0	tr|B8BZ70|B8BZ70_THAPS	Phosphoglycerate mutase OS=Thalassiosira pseudonana GN=PGAM2 PE=3 SV=1	gi|302340132|ref|YP_003805338.1|	303	2e-102	COG0588	Phosphoglycerate mutase (BPG-dependent)	G	Carbohydrate transport and metabolism	K01834|1|2e-68|215|cre:CHLREDRAFT_99328| 2,3-bisphosphoglycerate-dependent phosphoglycerate mutase [EC:5.4.2.11]	GO:0006096//glycolytic process	GO:0046538//2,3-bisphosphoglycerate-dependent phosphoglycerate mutase activity	-
21	EED87898.1	precursor of synthase [Thalassiosira pseudonana CCMP1335]	52559.7	0.091	4	20	XP_002294538.1	1.21	20	0.002	1.3	EED87898.1	MNSLASAARSLLQRQSRTISKSAASVSVRSVTTLQETLAAQVPSKQASLAALKKDHGSKVIGKVTIDQLIGGARGVKCMLWETSNLDADEGIRFRGLTIPECQQVLPTFSGKAGDGEPLLESLIWLLLTSEVPTKEQVDTLTAELHQRSLKLPDHVVPLLNSLPKDMHPMTQFSIGLNAAQTASTFAKAYADGVPKNEYHKYALEDILNVFAIIPEIAATIYRNVYFDGVVTKDTSLDYSGNFCRMLGYDNPSFDELMRLYLCIHTDHEGGNASAHTTHLVGSTLSDPYLSYAAGLNALAGPLHGLANQEVLKWIQALQDKFAKEGKEVNADTITEFAWETLNAKKVIPGYGHAVLRKTDPRYTCQREFGLKHMPDDDLFKIVDTIYQVMPGILTEHGK…	100	0	gi|224011770|ref|XP_002294538.1|	precursor of synthase [Thalassiosira pseudonana CCMP1335]	59.08	1e-178	sp|Q9W401|CISY_DROME	Probable citrate synthase, mitochondrial OS=Drosophila melanogaster GN=kdn PE=2 SV=1	100	0	tr|B8CEG2|B8CEG2_THAPS	Citrate synthase OS=Thalassiosira pseudonana GN=CSN1 PE=3 SV=1	gi|375013701|ref|YP_004990689.1|	471	7e-163	COG0372	Citrate synthase	C	Energy production and conversion	K01647|1|0.0|518|ppp:PHYPADRAFT_140151| citrate synthase [EC:2.3.3.1]	GO:0044262//cellular carbohydrate metabolic process;GO:0006099//tricarboxylic acid cycle	GO:0004108//citrate (Si)-synthase activity	-
22	EED93255.1	probable SOLUBLE pyridine nucleotide transhydrogenase [Thalassiosira pseudonana CCMP1335]	50421.7	0.082	4	5	XP_002289718.1	2.328	4	0.019	1.2	EED93255.1	MIGTCSWNCVLNAEVVKLLEYVFSSRIFFCTHQRNHTSVWNEIVNSCLELASSNARDTIRQLEYAGVTYVQGAAAFADSRGSSSLFITSPDMSVSTVSSDKILLATGSTPFRPGGIPFDGKRVFDSDSINTLSRLPKSVAITGSGIIAIEFAKIFKNLGSDVTLIIRDNIPRNALMKIGLDKDIAATLVADLVRSGIKIERGAQVKKFTVPRDNDKAPMVLELEAKGGGERPSGEITTLKCDIYLAAVGRKPNTMNLNLAAAGIKTDQYGGIAVDSDLRSTATGGNVYAAGDVLGRPFLASTGMAQGFAAIRRMFRDDISLAANPFAFPIGVWSSPEASYYGLSTQQCKEMGIDAGEGVALYAECLRGLVFSPNGLLKLVFDKSNGRIMGVHICGDDAC…	100	0	gi|224000091|ref|XP_002289718.1|	probable SOLUBLE pyridine nucleotide transhydrogenase [Thalassiosira pseudonana CCMP1335]	32	2e-54	sp|Q48A14|STHA_COLP3	Soluble pyridine nucleotide transhydrogenase OS=Colwellia psychrerythraea (strain 34H / ATCC BAA-681) GN=sthA PE=3 SV=1	100	0	tr|B8BYY9|B8BYY9_THAPS	Probable SOLUBLE pyridine nucleotide transhydrogenase OS=Thalassiosira pseudonana GN=THAPSDRAFT_268657 PE=4 SV=1	gi|159184862|ref|NP_354649.2|	208	4e-60	COG1249	Pyruvate/2-oxoglutarate dehydrogenase complex, dihydrolipoamide dehydrogenase (E3) component or related enzyme	C	Energy production and conversion	K00382|1|7e-43|163|vcn:VOLCADRAFT_83716| dihydrolipoamide dehydrogenase [EC:1.8.1.4]	GO:0045454//cell redox homeostasis;GO:0055114//oxidation-reduction process	GO:0050660//flavin adenine dinucleotide binding;GO:0003957//NAD(P)+ transhydrogenase (B-specific) activity;GO:0016668//oxidoreductase activity, acting on a sulfur group of donors, NAD(P) as acceptor	GO:0005737//cytoplasm
23	XP_002289446.1	precursor of synthetase [Thalassiosira pseudonana CCMP1335]	31570.9	0.07	2	14	EED92983.1	1.509	12	0.002	1.6	XP_002289446.1	MSANAKVWIDKDTRVICQGFTGKQGTFHSTQAIEYGTNMVGGVTPKKGGQEHLGLPVFDSVADAVLEVKPDASVIYVPPPYCAAAILDAIENEIPLVVAITEGVPQQDMVRVKKALLSQDKTRLIGPNCPGIIKPGECKIGIMPGYIHKAGKIGVVSRSGTLTYEAVHQTTVTGLGQSTCVGIGGDPFNGTNFIDCLERFRDDPQTEGIIMIGEIGGSAEEEAAEWWANNGDPNKPVVGFIAGMTAPPGRRMGHAGAIVAGGKGGANEKFAALEAAGIHVTRSPAQLGTTMMRAMGLAE	100	0	gi|223999547|ref|XP_002289446.1|	precursor of synthetase [Thalassiosira pseudonana CCMP1335]	71.97	1e-128	sp|Q8GTQ9|SUCA1_SOLLC	Succinate--CoA ligase [ADP-forming] subunit alpha-1, mitochondrial OS=Solanum lycopersicum GN=SCOA PE=1 SV=1	100	0	tr|B8C013|B8C013_THAPS	Succinate--CoA ligase [ADP-forming] subunit alpha, mitochondrial OS=Thalassiosira pseudonana GN=SCS2 PE=3 SV=1	gi|389878864|ref|YP_006372429.1|	414	4e-145	COG0074	Succinyl-CoA synthetase, alpha subunit	C	Energy production and conversion	K01899|1|7e-135|388|ota:Ot03g05850| succinyl-CoA synthetase alpha subunit [EC:6.2.1.4 6.2.1.5]	GO:0008152//metabolic process	GO:0004776//succinate-CoA ligase (GDP-forming) activity;GO:0046872//metal ion binding;GO:0003878//ATP citrate synthase activity;GO:0004775//succinate-CoA ligase (ADP-forming) activity;GO:0048037//cofactor binding;GO:0000166//nucleotide binding	GO:0044464//cell part
24	EED92502.1	phosphoglycerate mutase [Thalassiosira pseudonana CCMP1335]	32673.8	0.133	2	7	XP_002290750.1	1.947	7	0.002	1.1	EED92502.1	MKSSTLLFLLASIGSTSGFVAPVTRTTFTANPTCTELYNHKLVLVRHGESTWNDLNIFTGWADADLNEKGKAEALAGGKLIKEAGFTFDVAYTSVLKRAIKTLWIILEEMDLMYIPIVNTWRLNERHYGGLQGLNKQETVDEYGKDQVLIWRRSYDIPPPECDESSEYYPGNDPRYANVDKADLPKTESLKLTEDRFMPVWENEIAPAIKSGKKVLIAAHGNTLRALVKHLDNISSDTIAELNIPTGVPLVYELDDDLNVVPNENAIAPLQGMYLGNLDDVKARIAGVANQTK	100	0	gi|224002156|ref|XP_002290750.1|	phosphoglycerate mutase [Thalassiosira pseudonana CCMP1335]	63.78	3e-117	sp|Q54NE6|PGAM_DICDI	Probable phosphoglycerate mutase OS=Dictyostelium discoideum GN=gpmA PE=1 SV=1	100	0	tr|B8C354|B8C354_THAPS	Phosphoglycerate mutase OS=Thalassiosira pseudonana GN=PGAM1 PE=3 SV=1	gi|397689686|ref|YP_006526940.1|	339	1e-116	COG0588	Phosphoglycerate mutase (BPG-dependent)	G	Carbohydrate transport and metabolism	K01834|1|2e-76|235|cre:CHLREDRAFT_99328| 2,3-bisphosphoglycerate-dependent phosphoglycerate mutase [EC:5.4.2.11]	GO:0006096//glycolytic process	GO:0046538//2,3-bisphosphoglycerate-dependent phosphoglycerate mutase activity	-
25	XP_002287523.1	pyruvate dehydrogenase [Thalassiosira pseudonana CCMP1335]	42198.1	0.027	2	7	EED94966.1;EJK55386.1	1.585	7	0.002	1.7	XP_002287523.1	MSTDTATFDLTGSFETYNLDTQPNNTIEMTKDELLSHFELMYTMRRMEITCDNEYKARAIRGFCHLYDGQEAVATGINAAFDPEDSWITSYRCHCTALARGGSVASVLGELFGHVDGQTKGKGGSMHFYNKAHNFFGGQGIVGAQVPVGLGLAFANHYNATPGKPMQVAIACYGDGAANQGQIWESANMASLWKLPMIFCIENNHYGMGTSMDRHSSHSDYYKMGNHIPGVRIDGMNVLAVKEGMRFVKDYVGNGNGPMYVEMMTYRYHGHSMSDPGTTYRNREEIALTRSTRDPLEFVKRTLVDAGFTDAEEIKEIEKRIRKDVANQVKQAKASSKPTVEPHLFEYVYSSDGGKEQNEFPPHIRMPDFAKSKNY	100	0	gi|223995699|ref|XP_002287523.1|	pyruvate dehydrogenase [Thalassiosira pseudonana CCMP1335]	51.55	4e-116	sp|Q6Z5N4|ODPA1_ORYSJ	Pyruvate dehydrogenase E1 component subunit alpha-1, mitochondrial OS=Oryza sativa subsp. japonica GN=Os02g0739600 PE=2 SV=1	100	0	tr|B8BVN4|B8BVN4_THAPS	Pyruvate dehydrogenase OS=Thalassiosira pseudonana GN=PDHA1 PE=4 SV=1	gi|88607434|ref|YP_504713.1|	297	2e-97	COG1071	TPP-dependent pyruvate or acetoin dehydrogenase subunit alpha	C	Energy production and conversion	K00161|1|2e-124|368|cme:CYME_CMT256C| pyruvate dehydrogenase E1 component alpha subunit [EC:1.2.4.1]	GO:0006096//glycolytic process;GO:0055114//oxidation-reduction process	GO:0004739//pyruvate dehydrogenase (acetyl-transferring) activity	GO:0043231//intracellular membrane-bounded organelle
26	EJK72804.1	hypothetical protein THAOC_05626 [Thalassiosira oceanica]	71437.5	0.04	2	2	-	3.703	2	0.02	1.9	EJK72804.1	MGELLEVYEASTSASLAQYKATHASSISDVSGYWSELAKSKLTWFAPFSEGLSGSFEEGSVSWFAGGRLNFVGKENETAIIWEGDEPGNVKHISFHELKNEVCKIANALKSAGVTKGDVVTLYMPMVPELCYTMLACARIGAIHSVIFAGFSADAIADRIQDAKSKWVVTASAGSRGGRNLPLKTICDAAVKKDRCVGVVEKVFVFDGKGETGSDWEVQDIHVKMTELVAAQRPVCSCEWMDAEDPLFILYTSGSTGRPKGLVHTTGGYALFAMHTTANSFGLSQQTAASTDGPKDVYACVADAGWITGHTYIVYGPLLNGCSTLMFESTPMYPDCGRYWDMVQRHKITVFYTAPTAIRSLMRFGDEAPNKYDLSSLRVLGTVGEPINPAAWKWYFDVI…	100	0	gi|397637786|gb|EJK72804.1|	hypothetical protein THAOC_05626 [Thalassiosira oceanica]	52.22	0	sp|Q54Z60|ACSA_DICDI	Acetyl-coenzyme A synthetase OS=Dictyostelium discoideum GN=acsA PE=3 SV=1	100	0	tr|K0T6W2|K0T6W2_THAOC	Acetyl-coenzyme A synthetase OS=Thalassiosira oceanica GN=THAOC_05626 PE=3 SV=1	gi|357384948|ref|YP_004899672.1|	690	0	COG0365	Acyl-coenzyme A synthetase/AMP-(fatty) acid ligase	I	Lipid transport and metabolism	K01895|1|0.0|619|mus:104000631| acetyl-CoA synthetase [EC:6.2.1.1]	GO:0008152//metabolic process	GO:0003987//acetate-CoA ligase activity;GO:0016208//AMP binding	-
27	XP_002290752.1	acetyl-coenzyme a synthetase, partial [Thalassiosira pseudonana CCMP1335]	70955.2	0.079	2	5	EED92504.1	1.709	5	0.043	0.8	XP_002290752.1	YKANHATSIQDTSAYWSDLAKSKLDWFAPFPAAVTGSFKDGSVSWFAGGKINVCHNAVDRYCLAPYNRGDEIAIIWEGDEPSSVKNITYRELQLSVCRIANALKSQGVQKGDVVTLYMPMVPELAMTMLACARIGAVHSVIFAGFSADAIADRIDDAKSKWVVTASAGSRGGRNLPLKSICDAAIMKERCAGVVEKVFVFDGAGANGNEWEKKDVHVKFTELVEAQRPVCPCEWMDAEDPLFILYTSGSTGRPKGLLHTTGGYSIYAMHTTANSFGLSQQTGPSSPNDPHKDVYACVADAGWITGHTYIVYGPLLNGISTFMFESTPMYPDHGRYWDMVQRHKITVFYTAPTAIRSLMRFGDDAPKKYDLSSLKVLGTVGEPINPAAWKWYFDVIGKGN…	100	0	gi|224002160|ref|XP_002290752.1|	acetyl-coenzyme a synthetase [Thalassiosira pseudonana CCMP1335]	52.83	0	sp|Q54Z60|ACSA_DICDI	Acetyl-coenzyme A synthetase OS=Dictyostelium discoideum GN=acsA PE=3 SV=1	100	0	tr|B8C359|B8C359_THAPS	Acetyl-coenzyme A synthetase (Fragment) OS=Thalassiosira pseudonana GN=ACAS2 PE=3 SV=1	gi|529065557|ref|YP_008374720.1|	699	0	COG0365	Acyl-coenzyme A synthetase/AMP-(fatty) acid ligase	I	Lipid transport and metabolism	K01895|1|0.0|605|mus:104000631| acetyl-CoA synthetase [EC:6.2.1.1]	GO:0008152//metabolic process	GO:0003987//acetate-CoA ligase activity;GO:0016208//AMP binding	-
28	EED93255.1	probable SOLUBLE pyridine nucleotide transhydrogenase [Thalassiosira pseudonana CCMP1335]	50421.7	0.082	4	5	XP_002289718.1	2.328	4	0.019	1.2	EED93255.1	MIGTCSWNCVLNAEVVKLLEYVFSSRIFFCTHQRNHTSVWNEIVNSCLELASSNARDTIRQLEYAGVTYVQGAAAFADSRGSSSLFITSPDMSVSTVSSDKILLATGSTPFRPGGIPFDGKRVFDSDSINTLSRLPKSVAITGSGIIAIEFAKIFKNLGSDVTLIIRDNIPRNALMKIGLDKDIAATLVADLVRSGIKIERGAQVKKFTVPRDNDKAPMVLELEAKGGGERPSGEITTLKCDIYLAAVGRKPNTMNLNLAAAGIKTDQYGGIAVDSDLRSTATGGNVYAAGDVLGRPFLASTGMAQGFAAIRRMFRDDISLAANPFAFPIGVWSSPEASYYGLSTQQCKEMGIDAGEGVALYAECLRGLVFSPNGLLKLVFDKSNGRIMGVHICGDDAC…	100	0	gi|224000091|ref|XP_002289718.1|	probable SOLUBLE pyridine nucleotide transhydrogenase [Thalassiosira pseudonana CCMP1335]	32	2e-54	sp|Q48A14|STHA_COLP3	Soluble pyridine nucleotide transhydrogenase OS=Colwellia psychrerythraea (strain 34H / ATCC BAA-681) GN=sthA PE=3 SV=1	100	0	tr|B8BYY9|B8BYY9_THAPS	Probable SOLUBLE pyridine nucleotide transhydrogenase OS=Thalassiosira pseudonana GN=THAPSDRAFT_268657 PE=4 SV=1	gi|159184862|ref|NP_354649.2|	208	4e-60	COG1249	Pyruvate/2-oxoglutarate dehydrogenase complex, dihydrolipoamide dehydrogenase (E3) component or related enzyme	C	Energy production and conversion	K00382|1|7e-43|163|vcn:VOLCADRAFT_83716| dihydrolipoamide dehydrogenase [EC:1.8.1.4]	GO:0045454//cell redox homeostasis;GO:0055114//oxidation-reduction process	GO:0050660//flavin adenine dinucleotide binding;GO:0003957//NAD(P)+ transhydrogenase (B-specific) activity;GO:0016668//oxidoreductase activity, acting on a sulfur group of donors, NAD(P) as acceptor	GO:0005737//cytoplasm
29	EED94112.1	predicted protein [Thalassiosira pseudonana CCMP1335]	77429.1	0.067	4	6	XP_002288676.1	1.638	6	0.01	0.7	EED94112.1	MKVSSIALFLLPLAHSACAWTSSPHASVSAHHRRSRSSTLAATPTFLGSTTVDAAEKVKDADALAIEAAAAAAAAAAAVTNTNERTFGTVSTSKLNKLYDLVVIGGGPAGVAGAIKAAQMGRRAILIDKPKFDAGVLPNGLDLFFGGPTGLFSKALRDSAKNTNVAAMRAQHMDSDVIWKQITNDIVKLASRNAEGQCRTLARYGIDYLQGSAQLLGEDDDKNVNALKKFKNDLDSPENGVRSVSVSNTVLVDKDGNLMEESEVTVTGTKVLVATGSKSTRLRGIPFEQSHRVFDSDTINLLGYFPRSVTISGLGIIGIEFANIFNALGVKDVKILVRGDVESSTKKLGMDMDVANELMRLLRESGVQILERTTIEEFSYVPSPEKTDEYIQMKLTDGS…	100	0	gi|223998006|ref|XP_002288676.1|	predicted protein [Thalassiosira pseudonana CCMP1335]	30.49	5e-41	sp|P9WHH5|STHA_MYCTU	Probable soluble pyridine nucleotide transhydrogenase OS=Mycobacterium tuberculosis (strain ATCC 25618 / H37Rv) GN=sthA PE=1 SV=1	100	0	tr|B8BWY9|B8BWY9_THAPS	Uncharacterized protein OS=Thalassiosira pseudonana GN=THAPSDRAFT_21619 PE=4 SV=1	gi|430743905|ref|YP_007203034.1|	202	9e-56	COG1249	Pyruvate/2-oxoglutarate dehydrogenase complex, dihydrolipoamide dehydrogenase (E3) component or related enzyme	C	Energy production and conversion	K00382|1|4e-27|119|cre:CHLREDRAFT_57890| dihydrolipoamide dehydrogenase [EC:1.8.1.4]!K00383|3|6e-27|119|bpg:Bathy01g05260| glutathione reductase (NADPH) [EC:1.8.1.7]	GO:0045454//cell redox homeostasis;GO:0055114//oxidation-reduction process	GO:0050660//flavin adenine dinucleotide binding;GO:0016491//oxidoreductase activity;GO:0005509//calcium ion binding	GO:0005737//cytoplasm
30	EED87185.1	precursor of hydrogenase lipoamide dehydrogenase, partial [Thalassiosira pseudonana CCMP1335]	50036.3	0.164	3	6	XP_002296489.1	1.356	6	0.046	0.7	EED87185.1	DTVVIGGGPGGYVAAIKSAQMGLRTACVEMRGSLGGTCLNVGCIPSKALLQSSHHFHDAKHHFADHGISMGNGGEVTMDVGKMLDAKAQTVKGLTGGIEHLFKKHKVEYFKGRGTLKGVDGVEVQLNEGGVESLEAKNIIIATGSEVTPLPPVPVDNAGGKIVDSTGALEISKIPTKMAVIGGGVIGLEMGSVWSRLGTEVTVIEFMDRLCPAMDQELTKKFQTTLKKQGFKFKLKTKVVKSEVVGDEVAITTEPSKGGEQTTENYDVVLVATGRRPYTEGLGLENLGIQTDKLGRIQVDSHFRTAVPSIYAIGDCIDGPMLAHKAEEEGIAAVETIAGFAGHVNYDAIPGVIYTFPEVASVGKTEEELKEANVAFNKGSFPFAANSRARANATGNSEG…	100	0	gi|224013650|ref|XP_002296489.1|	precursor of hydrogenase lipoamide dehydrogenase [Thalassiosira pseudonana CCMP1335]	60.21	2e-169	sp|Q9M5K3|DLDH1_ARATH	Dihydrolipoyl dehydrogenase 1, mitochondrial OS=Arabidopsis thaliana GN=LPD1 PE=1 SV=2	100	0	tr|B8LBI2|B8LBI2_THAPS	Dihydrolipoyl dehydrogenase (Fragment) OS=Thalassiosira pseudonana GN=LPD PE=3 SV=1	gi|209965544|ref|YP_002298459.1|	551	0	COG1249	Pyruvate/2-oxoglutarate dehydrogenase complex, dihydrolipoamide dehydrogenase (E3) component or related enzyme	C	Energy production and conversion	K00382|1|0.0|526|gsl:Gasu_15110| dihydrolipoamide dehydrogenase [EC:1.8.1.4]	GO:0045454//cell redox homeostasis;GO:0055114//oxidation-reduction process	GO:0050660//flavin adenine dinucleotide binding;GO:0004148//dihydrolipoyl dehydrogenase activity	GO:0005737//cytoplasm
31	XP_002286889.1	Long-chain-fatty-acid--CoA ligase, partial [Thalassiosira pseudonana CCMP1335]	60265.5	0.018	3	6	EED96530.1	0.92	9	0.062	2.4	XP_002286889.1	LAIFENTCPEWMIGALGAYSQSISITTVYATLGIDAVIDSINDGRIRAILCNKRNVSLLLSKIKDMPSLKHIIYTNDMIAPGESVNIATPPKDVKVSSFEDFVNAGDTKAFPIVPPTPETCAVIMYTSGSTGKPKGVVVTHKNVLATTSMVTEIINENDVFVAYLPLAHIFELVAEFSCLAMGSCICYADPKTLTATGSYPVGALEQYRPTLMVGVPKIWDVIKKGIQAKVAGGSKVAQFLVATAFEARSRAMKLGFDTPLFKALVFKKFSKVVGGRLRLAVSGGGPLNADVQGFISTCFGCPLGQGYGLTETCAGLTLQDLADDRVGIAGVPIPCVEVKLVSCPEINDKAGLPYLTSDRKDVNGKSVFGRGEIWVKGANVGLGYYMMAEKSKEDFDED…	100	0	gi|223994411|ref|XP_002286889.1|	Long-chain-fatty-acid--CoA ligase [Thalassiosira pseudonana CCMP1335]	36.65	2e-111	sp|Q9SJD4|LACS8_ARATH	Long chain acyl-CoA synthetase 8 OS=Arabidopsis thaliana GN=LACS8 PE=1 SV=1	100	0	tr|B8BRF3|B8BRF3_THAPS	Long-chain-fatty-acid--CoA ligase (Fragment) OS=Thalassiosira pseudonana GN=ACS1 PE=4 SV=1	gi|397689178|ref|YP_006526432.1|	203	3e-56	COG1022	Long-chain acyl-CoA synthetase (AMP-forming)	I	Lipid transport and metabolism	K01897|1|1e-116|363|gra:105770725| long-chain acyl-CoA synthetase [EC:6.2.1.3]	GO:0001676//long-chain fatty acid metabolic process	GO:0004467//long-chain fatty acid-CoA ligase activity	-
32	EJK75202.1	hypothetical protein THAOC_03085, partial [Thalassiosira oceanica]	115204	0.091	5	-	EJK75202.1	0.48	4	0.002	2.7	EJK75202.1	MTVEDVSGTPSCSFDFQFNDVPASDRVTRHGYHAVIEDAGTFASVLPDVLNQMGAKMEGDAAKDGPVNVVQISPLKGDASVEDLQAAVYANKDKLNMLGIRTVTVLVPRAKKDPMYYSFPQCEGFEEDPLRRGMRATFHHLLELNRLTDNYNVERLPAVGRSVQLYVGSEKTVRRNPAQVVSVRGITHTPGLTTFSGARRALLQGLDELERAQGNSKVSLQSSSRIYIHSLPVVEGSTPEEIAAEFNEVIDKLKGRLAQRLLKLRVDEVEAKVRVQSIDADGNPMIVPIRLVASSMEGEWLKTSAFIEKPDPVTGVTREFCTIGDTDGACVLDPYDGANIVQTKRAIARRVGSTYAYDFLGLLEVGLIQEWDAYKESLGSDISTPANVFEAQELLEGED…	100	0	gi|397642386|gb|EJK75202.1|	hypothetical protein THAOC_03085, partial [Thalassiosira oceanica]	42.59	0	sp|P11029|ACAC_CHICK	Acetyl-CoA carboxylase OS=Gallus gallus GN=ACAC PE=1 SV=1	100	0	tr|K0TQ04|K0TQ04_THAOC	Uncharacterized protein (Fragment) OS=Thalassiosira oceanica GN=THAOC_03085 PE=4 SV=1	gi|258652381|ref|YP_003201537.1|	117	8e-25	COG4799	Acetyl-CoA carboxylase, carboxyltransferase component	I	Lipid transport and metabolism	K11262|1|0.0|956|mis:MICPUN_113382| acetyl-CoA carboxylase / biotin carboxylase 1 [EC:6.4.1.2 6.3.4.14]	GO:0006633//fatty acid biosynthetic process	GO:0046872//metal ion binding;GO:0005524//ATP binding;GO:0004075//biotin carboxylase activity;GO:0003989//acetyl-CoA carboxylase activity	-
33	EJK72094.1	hypothetical protein THAOC_06412 [Thalassiosira oceanica]	114178	0.095	3	6	-	1.226	3	0.021	0.6	EJK72094.1	MVAEGIAPSAISAFESTFKSLVSGATGIIPESTISPVPELVHTDSLSIEPDSELLASTVVLKLNGGLGTGMGLDKAKSLLKVKNDETFLDLTAKQVMCMRKEFGQNVKFMLMNSFSTSDDTLEFFRTKYPNLAAEEGLEMMQNKVPKIDAKTFEPATCETDPSNEWCPPGHGDLYAALIGSGRLAALLKGGFKYMFVSNSDNLGATLDLKILTHFATTDASFMMECCERTENDKKGGHLAIRNEDKHLILRESAMCADEDEKDFQDITKHKFFNTNNLWIRLDKLQEIVDKCGGFIPLPMIKNNKTVDPKDDSSQKVVQLETAMGAAIECFEGASAVIVPRTRFAPVKKCNDLLLLRSDAYIITEDFRPVLNPACGGKAPVISLDSKKFKMVQALEEAT…	100	0	gi|397635971|gb|EJK72094.1|	hypothetical protein THAOC_06412 [Thalassiosira oceanica]	56.59	0	sp|Q9SGC1|PGMC2_ARATH	Probable phosphoglucomutase, cytoplasmic 2 OS=Arabidopsis thaliana GN=At1g70730 PE=1 SV=1	100	0	tr|K0T4M9|K0T4M9_THAOC	Uncharacterized protein OS=Thalassiosira oceanica GN=THAOC_06412 PE=4 SV=1	gi|427737591|ref|YP_007057135.1|	602	0	COG0033	Phosphoglucomutase	G	Carbohydrate transport and metabolism	K01835|1|0.0|652|bvg:104896820| phosphoglucomutase [EC:5.4.2.2]	GO:0005975//carbohydrate metabolic process	GO:0016779//nucleotidyltransferase activity;GO:0000287//magnesium ion binding;GO:0004614//phosphoglucomutase activity	-
34	EJK72506.1	hypothetical protein THAOC_05958 [Thalassiosira oceanica]	60528.8	0.177	2	4	-	1.45	4	0.043	0.9	EJK72506.1	MMNSMRTTLAPLARRAASSAHSTSAKSGATIRLSGSSSAGAALNSRLPDVDPDLCRLIEQEKARQRSSLVLIASENFTSRAVLDALGSVLSNKYSEGYPGARYYGGNENIDQVELLCQRRALDTFELDTEEWGVNVQSLSGSPANFQVSFRGGVPWIFLSWQHNIGAGLTRIVMICLQVYTALLETHDRILSLDLPHGGHLSHGFQTPTKKISAVSRYFESMPYRLNEETETIDYDEMERSALLFRPKLIVAGASAYSRLIDYKRIREIADKVGAFVLADMAHISGLVAAKVIPSCFPYADVVTTTTHKSLRGPRGAMIFYRKGQRGVTKKGDPIMYDIEEKINFAVFPGLQGGPHNHTIGALSVALKQANTPEFVQYQKQVLKNCARLSDELQRMGYD…	100	0	gi|397637034|gb|EJK72506.1|	hypothetical protein THAOC_05958 [Thalassiosira oceanica]	63.64	0	sp|Q94C74|GLYM2_ARATH	Serine hydroxymethyltransferase 2, mitochondrial OS=Arabidopsis thaliana GN=SHM2 PE=1 SV=2	100	0	tr|K0TFW4|K0TFW4_THAOC	Serine hydroxymethyltransferase OS=Thalassiosira oceanica GN=THAOC_05958 PE=3 SV=1	gi|320103670|ref|YP_004179261.1|	365	8e-120	COG0112	Glycine/serine hydroxymethyltransferase	E	Amino acid transport and metabolism	K00600|1|0.0|639|jcu:105639938| glycine hydroxymethyltransferase [EC:2.1.2.1]	GO:0009750//response to fructose;GO:0019684//photosynthesis, light reaction;GO:0009853//photorespiration;GO:0009749//response to glucose;GO:0009744//response to sucrose;GO:0009697//salicylic acid biosynthetic process;GO:0019264//glycine biosynthetic process from serine;GO:0042742//defense response to bacterium;GO:0006730//one-carbon metabolic process;GO:0009814//defense response, incompatible int…	GO:0005515//protein binding;GO:0008270//zinc ion binding;GO:0004372//glycine hydroxymethyltransferase activity;GO:0008168//methyltransferase activity;GO:0050897//cobalt ion binding;GO:0030170//pyridoxal phosphate binding;GO:0008266//poly(U) RNA binding	GO:0048046//apoplast;GO:0010319//stromule;GO:0022626//cytosolic ribosome;GO:0005759//mitochondrial matrix;GO:0005747//mitochondrial respiratory chain complex I;GO:0009570//chloroplast stroma;GO:0009534//chloroplast thylakoid;GO:0005886//plasma membrane;GO:0005634//nucleus
35	EED93777.1	phosphoglycerate kinase [Thalassiosira pseudonana CCMP1335]	40988.2	0.075	3	6	XP_002288341.1	1.46	4	0.019	1.1	EED93777.1	MRVDLNVPLSKGDDVTVTDDTRLRAIVPTAKFLLDKGANVILCSHFGRPKGEIIETGKNGRLNPVVGPLKELLGVDVKKVNDCIGEEVESVAKSLTKGEVLLLENTRFYKGETKNDAELAAGLGKLADYFVMDAFGTAHRAHSSTAGVAEHMKMSAAGFLLDKELKYLKGAVDEPNRPLCAIIGGAKVSTKLPVIESLLEKCDVILLGGGMIFTFYKAMGYDIGASMLEEEYVELAGKLMKQAEEKGVKLILPPDVVLADKFAEDANTAVAKASEISGDWMGLDVGPETLELFKEEIGKCNTIVFNGPMGVFEMKPFATGTITVAELMAEATERGATTIVGGGDSVAAVNQAGLGDKVSHISTGGGASLELLEGKELPGVAALSEA	100	0	gi|223997336|ref|XP_002288341.1|	phosphoglycerate kinase [Thalassiosira pseudonana CCMP1335]	58.81	8e-154	sp|Q9LD57|PGKH1_ARATH	Phosphoglycerate kinase 1, chloroplastic OS=Arabidopsis thaliana GN=PGK1 PE=1 SV=1	100	0	tr|B8BXW2|B8BXW2_THAPS	Phosphoglycerate kinase OS=Thalassiosira pseudonana GN=PGK1 PE=3 SV=1	gi|434395205|ref|YP_007130152.1|	448	9e-156	COG0126	3-phosphoglycerate kinase	G	Carbohydrate transport and metabolism	K00927|1|6e-158|453|thj:104812374| phosphoglycerate kinase [EC:2.7.2.3]	GO:0016310//phosphorylation;GO:0006096//glycolytic process	GO:0004618//phosphoglycerate kinase activity	GO:0005737//cytoplasm;GO:0016020//membrane
36	EJK45719.1	isocitrate lyase [Thalassiosira oceanica]	26966.4	0.051	4	12	XP_002295742.1;ACI64459.1	1.73	7	0.012	1.7	EJK45719.1	MWESSNPFALSNAAARRVADSIFGEKGSVYFDWEACRVREGYYRIKPGVEYCIQRARAYAPHSDLIWMETGKPGIPVARKFSQGVKAVFPHQMLAYNLRCVKIVCCFHLLIYQHNDIYICLSPSFNWDASGMSDEQLAKFNDDLGKLGYVWQFITLAGFHSNGLIITKLARSFGDEGMLAYVRDIQRQEKVQEVELLKHQKWSGAELVDRMVNVASGGQSSTAAMGAGVTESQFGKH	100	4e-180	gi|397567679|gb|EJK45719.1|	isocitrate lyase [Thalassiosira oceanica]	45.53	1e-65	sp|Q9SE26|ACEA_DENCR	Isocitrate lyase OS=Dendrobium crumenatum GN=ICL PE=2 SV=1	100	9e-179	tr|K0R325|K0R325_THAOC	Isocitrate lyase OS=Thalassiosira oceanica GN=THAOC_35650 PE=4 SV=1	gi|383762477|ref|YP_005441459.1|	154	1e-42	COG2224	Isocitrate lyase	C	Energy production and conversion	K01637|1|8e-68|221|zma:103633249| isocitrate lyase [EC:4.1.3.1]	GO:0019752//carboxylic acid metabolic process	GO:0004451//isocitrate lyase activity	-
37	XP_002293997.1	succinate dehydrogenase flavoprotein subunit [Thalassiosira pseudonana CCMP1335]	69699	0.071	4	5	EED89006.1	1.02	4	0.041	1.1	XP_002293997.1	MLSAFARRASSKATKLASTAPTPTTAVRSLSTSTTGDYTIVDHTYDALVIGAGGSGLRAAMGLSEAGFKTACVSKLFPTRSHTVAAQGGINAALGNMGPDDWRWHMYDTVKGSDWLGDQDAIHYMCREAPKAVLELEEFGLPFSRTEEGKIYQRAFGGQSLDFGKGGQAHRCCAAADRTGHAMLHTLYGRSLAFDTTYFIEYFAMDLLMTPDGQCVGAMALNMEDGTLHRIKAKNTVLATGGYGRTYFSCTSAHTCTGDGNAMAMRAGLANQDAEFVQFHPTGIYGAGCLITEGCRGEGGILRNSEGERFMERYAPSAKDLASRDVVSRAMTMEIREGRGVGPKKDHCYLHLDHLPAELLAERLPGISETAAIFAGVDVTKEPIPVLPTVHYNMGGIPT…	100	0	gi|224010078|ref|XP_002293997.1|	succinate dehydrogenase flavoprotein subunit [Thalassiosira pseudonana CCMP1335]	74.14	0	sp|O82663|SDHA1_ARATH	Succinate dehydrogenase [ubiquinone] flavoprotein subunit 1, mitochondrial OS=Arabidopsis thaliana GN=SDH1-1 PE=1 SV=1	100	0	tr|B8CCT7|B8CCT7_THAPS	Succinate dehydrogenase [ubiquinone] flavoprotein subunit, mitochondrial OS=Thalassiosira pseudonana GN=THAPSDRAFT_42475 PE=3 SV=1	gi|217979667|ref|YP_002363814.1|	824	0	COG1053	Succinate dehydrogenase/fumarate reductase, flavoprotein subunit	C	Energy production and conversion	K00234|1|0.0|915|ppp:PHYPADRAFT_181904| succinate dehydrogenase (ubiquinone) flavoprotein subunit [EC:1.3.5.1]	GO:0022900//electron transport chain;GO:0006099//tricarboxylic acid cycle	GO:0050660//flavin adenine dinucleotide binding;GO:0008177//succinate dehydrogenase (ubiquinone) activity	-
38	XP_002285992.1	aspartate aminotransferase [Thalassiosira pseudonana CCMP1335]	44617.2	0.22	7	24	EED95633.1	1.7	2	0.062	0.3	XP_002285992.1	MSKVVRNPNFAKLVGGYLFPEIGRRRNAYLAENPEMASRIISLGIGDTTQPIPDHILSGLVNSASKLGTKEGYSGYGAEQGMGDLRAKIADKLYNGIIKDSEVFVSDGAKCDIMRVQQVFGPGVVTAVQDPSYPVYVDTSVMMGQTGDINSSTNQYDNIVYMPCNAENDFFPDIESTPRADIVYFCSPNNPTGAAATKEQLEKLVKVCKERGSILVFDAAYAPFIRSEGVPKSIFEIEGAREVAIECNSFSKYAGFTGVRLGWTVVPDELTFADGSKVRDDFNRVMTTAFNGASNIVQGGGLACLDDEGLAEIDTLIDYYLENAKLLKEAMESIGYKVYGGTDAPYVFVKLPEGKSSWDTFSEILEKAQVVTIPGAGFGPGGEGYLRLSAFAPRDTVIE…	100	0	gi|223992617|ref|XP_002285992.1|	aspartate aminotransferase [Thalassiosira pseudonana CCMP1335]	60.34	6e-164	sp|Q10MQ2|DAPAT_ORYSJ	Probable LL-diaminopimelate aminotransferase, chloroplastic OS=Oryza sativa subsp. japonica GN=AGD2 PE=2 SV=1	100	0	tr|B8BT02|B8BT02_THAPS	Aspartate aminotransferase OS=Thalassiosira pseudonana GN=THAPSDRAFT_31394 PE=3 SV=1	gi|338174224|ref|YP_004651034.1|	468	4e-163	COG0436	Aspartate/methionine/tyrosine aminotransferase	E	Amino acid transport and metabolism	K10206|1|0.0|560|ccp:CHC_T00008432001| LL-diaminopimelate aminotransferase [EC:2.6.1.83]	GO:0033362//lysine biosynthetic process via diaminopimelate, diaminopimelate-aminotransferase pathway	GO:0030170//pyridoxal phosphate binding;GO:0004069//L-aspartate:2-oxoglutarate aminotransferase activity;GO:0010285//L,L-diaminopimelate aminotransferase activity;GO:0080130//L-phenylalanine:2-oxoglutarate aminotransferase activity	-
39	XP_002286781.1	THAPSDRAFT_260934 [Thalassiosira pseudonana CCMP1335]	42504.6	0.023	4	4	EED96422.1;EED96423.1;XP_002286782.1;EJK66011.1	1.35	7	0.003	1.4	XP_002286781.1	MEGWTNQHYDAKTDSGILTAKDGSLISLHHYSKDPLRLTPATTSLNYGTTIWEGLACRRSPTSNKALVFRPQKNHERFVNGAHAMCLPPPSYELFMRGLQLVIQNNIHLLPPSPTVDPETGVPEGGAKLYIRPMLMGSGQQLGLHASPQISLLYYVSPTGSYFQGKAMGGLKLHLERRRCRAARGGLGSVKCSGNYAVTMRPLLDAKKLGFDDNLYLELDTYQSSLHDAILQELSAANIFLVLKSGEIVTPSLKRGTILPGVTRDSVLTLARDDGDIKVTVSERDVKVKDLLDATEVFITGTAAEVVPVQSIATSPRPKDELEDGYDDSFSVSFTHGQSGGGPVTTKLLNMLREVMAEKRTCEATKDWLCDVYETPEGFQKGGSHN	100	0	gi|223994195|ref|XP_002286781.1|	Hypothetical protein THAPSDRAFT_260934 [Thalassiosira pseudonana CCMP1335]	38.73	4e-54	sp|Q9FYA6|BCAT5_ARATH	Branched-chain-amino-acid aminotransferase 5, chloroplastic OS=Arabidopsis thaliana GN=BCAT5 PE=1 SV=1	100	0	tr|B8BQU4|B8BQU4_THAPS	Branched-chain-amino-acid aminotransferase (Fragment) OS=Thalassiosira pseudonana GN=THAPSDRAFT_260934 PE=3 SV=1	gi|42522679|ref|NP_968059.1|	162	8e-45	COG0115	Branched-chain amino acid aminotransferase/4-amino-4-deoxychorismate lyase	EH	Amino acid transport and metabolism;Coenzyme transport and metabolism	K00826|1|4e-56|192|mis:MICPUN_106230| branched-chain amino acid aminotransferase [EC:2.6.1.42]	GO:0009082//branched-chain amino acid biosynthetic process	GO:0052654//L-leucine transaminase activity;GO:0052655//L-valine transaminase activity;GO:0052656//L-isoleucine transaminase activity	-
40	BAH30219.1	methionine S-adenosyl transferase [Detonula confervacea]	51057.4	0.206	2	12	-	0.67	3	0.046	1.2	BAH30219.1	MVEVRSFLFSSESVNEGHPDKLCDQVSDAVLDACLAADPMSKVACETATKDNMVMVFGEISTAANLDYEKIVRDQVREIGFSSFVDDLSSVASKGLSCDTCEVLVRINKQSPDIAGGVHVGKDDMDVGAGDQGIMFGYASDETDCHMPLTHLLANKLGKQLTDVRKDGSLWWLRPDGKTQVTIAYDQLADGSVIPTEIHTVLISTQHAEPSKAKRTEEQDGKDNRPAYTGEEQIAPSMAEMNTLIHDNVIVKTLEAITLKNGKSAFSIYNKETCHLHINPSGKFIIGGPQGDAGLTGRKIIIDTYGGWGAHGGGAFSGKDPTKVDRSAAYACRWMAKSVVAAGLCKRACVQLSYAIGVAKPLSLFVETYGTEKKGLTAAAITDIVKLEFDCRPGALARD…	100	0	gi|225685865|dbj|BAH30219.1|	methionine S-adenosyl transferase [Detonula confervacea]	58.16	6e-144	sp|Q9FPL6|METK2_SUASA	S-adenosylmethionine synthase 2 OS=Suaeda salsa GN=METK2 PE=2 SV=1	100	0	tr|B9ZZX7|B9ZZX7_DETCO	Methionine S-adenosyl transferase OS=Detonula confervacea GN=MATX PE=2 SV=1	gi|297617043|ref|YP_003702202.1|	384	2e-129	COG0192	S-adenosylmethionine synthetase	H	Coenzyme transport and metabolism	K00789|1|4e-147|428|cme:CYME_CMN227C| S-adenosylmethionine synthetase [EC:2.5.1.6]	GO:0006556//S-adenosylmethionine biosynthetic process;GO:0006730//one-carbon metabolic process	GO:0004478//methionine adenosyltransferase activity;GO:0046872//metal ion binding;GO:0005524//ATP binding	-
41	EED88796.1	phosphoadenosine-phosphosulphate reductase [Thalassiosira pseudonana CCMP1335]	49384.2	0.192	6	33	XP_002293787.1	1.24	3	0.062	1.3	EED88796.1	MKFIALFALISTTSVSGFAPSTRAMVNSRTTSTAVISQSSTSLQMADDAKIFDQESFIAESKEMRLKHLEEQAMFALKIAVENYGNAVFPNALIAGDSVITHLLHRMGYLKDGQAKVMVVDTFHLFPETMEFLREIEDFYGFKAEIFCAEGVPVGDKAAYDKKYGADLWKEDIEQYDKVCKVEPFQRGLKTLNTDCMINGRTRWQGFERAWIDQFENAPIGGGLAKCNPIAYWTLEDTFDYIAKYEVPHHPLHAKGYPSIGDAKDTIPIPEDGSTRFVNFKFEGDKTPWLDYASERKGRFVGLANKDGSTKTECGIHVAGAERTFDRDLWESGAVKNIESNDEALEIIKSGKEAIVAVYAPWCQFCQGMEEEFAKYAESAGVPVYKFRGDEERDFVSAN…	100	0	gi|224009658|ref|XP_002293787.1|	phosphoadenosine-phosphosulphate reductase [Thalassiosira pseudonana CCMP1335]	32.27	1e-28	sp|P56859|MET16_EMENI	Phosphoadenosine phosphosulfate reductase OS=Emericella nidulans (strain FGSC A4 / ATCC 38163 / CBS 112.46 / NRRL 194 / M139) GN=sA PE=3 SV=3	100	0	tr|B8CCL3|B8CCL3_THAPS	Phosphoadenosine-phosphosulphate reductase OS=Thalassiosira pseudonana GN=THAPSDRAFT_24887 PE=4 SV=1	gi|428206895|ref|YP_007091248.1|	136	1e-35	COG0175	3'-phosphoadenosine 5'-phosphosulfate sulfotransferase (PAPS reductase)/FAD synthetase or related enzyme	EH	Amino acid transport and metabolism;Coenzyme transport and metabolism	K00390|1|2e-91|283|ppp:PHYPADRAFT_123215| phosphoadenosine phosphosulfate reductase [EC:1.8.4.8 1.8.4.10]!K05907|5|5e-30|124|csv:101220567| adenylyl-sulfate reductase (glutathione) [EC:1.8.4.9]	GO:0045454//cell redox homeostasis;GO:0008152//metabolic process	GO:0003824//catalytic activity	-
42	XP_002294945.1	hypothetical protein THAPSDRAFT_26051 [Thalassiosira pseudonana CCMP1335]	46028.7	0.137	4	14	EED87725.1	0.69	6	0.002	1.1	XP_002294945.1	MKLSIALLSMAATATAFAPSLTTPSRTTSLSMVNPLEIRTGKAQLDHSVIDRFNALPYPADKVLAEYVWVDAKGECRSKTRTLPVARTTAVDNLPRWNFDGSSTGQAPGDDSEVILRPCRIFKDPFRPRNDGVDNILVMCDTYTPAGEALPTNTRAIAAKAFEGKEDEEIWFGLEQEFTLFNLDQRTPLGWPKGGVPARAQGPYYCSVGPENSFGRAITDTMYRACLYAGIEISGTNGEVMPGQQEYQVGPCVGIDAGDQLQMSRYILQRVCEEFQVYCTLHPKPIVEGDWNGAGMHTNVSTKSMREEGGLEVIKKAIYKLGAKHQEHIAVYGEGNELRLTGKHETASIDQFSFGVANRGASVRIGRDTEAEGKGYFEDRRPSSNADPYLVTGKIMATI…	100	0	gi|224012585|ref|XP_002294945.1|	hypothetical protein THAPSDRAFT_26051 [Thalassiosira pseudonana CCMP1335]	62.23	2e-156	sp|Q42624|GLNAC_BRANA	Glutamine synthetase, chloroplastic OS=Brassica napus GN=GLN2 PE=2 SV=1	100	0	tr|B8CFZ9|B8CFZ9_THAPS	Glutamine synthetase OS=Thalassiosira pseudonana GN=GLNA PE=3 SV=1	gi|470180041|ref|YP_007566085.1|	307	9e-101	COG0174	Glutamine synthetase	E	Amino acid transport and metabolism	K01915|1|9e-158|455|egr:104425029| glutamine synthetase [EC:6.3.1.2]	GO:0009750//response to fructose;GO:0010155//regulation of proton transport;GO:0006098//pentose-phosphate shunt;GO:0009749//response to glucose;GO:0010218//response to far red light;GO:0009744//response to sucrose;GO:0006833//water transport;GO:0010114//response to red light;GO:0009651//response to salt stress;GO:0007568//aging;GO:0006542//glutamine biosynthetic process;GO:0006972//hyperosmotic r…	GO:0004356//glutamate-ammonia ligase activity;GO:0005524//ATP binding	GO:0009941//chloroplast envelope;GO:0048046//apoplast;GO:0022626//cytosolic ribosome;GO:0009570//chloroplast stroma;GO:0009535//chloroplast thylakoid membrane;GO:0005739//mitochondrion

## Sheet: Ribosome
Title :	Comparative proteomic analysis reveals specific metabolic regulations of the diatom Skeletonema dohrnii to the temperature and silicate stress
Authors :	Satheeswaran Thangaraj, Mario Giordano and Jun Sun*
Table S3	Downregulation of ribosomal proteins in lower silicate cells
S. No	Subunit	Protein_ID	Description	Mass	Protein_Coverage	Uniq_Pep_Num	Uniq_Spec_Num	Sameset	Ratio_Control-VS-Low silicate	Quant_Num_Control-VS-Low silicate	Qvalue_Control-VS-Low silicate	Fold ange	Protein_ID	Protein_Seqence	NCBInr Identity	NCBInr E-value	NCBInr Accession	NCBInr Description	Swissprot Identity	Swissprot E-value	Swissprot Accession	Swissprot Description	Tremble Identity	Tremble E-value	Tremble Accession	Tremble Description	Protein_or_Domain	COG Score	COG E-value	COG ID	COG Function-Description	COG Code	COG Function-Categories	KEGG(ko_id|rank|evalue|score|identity|ko_definition)	GO Biological_Process	GO Molecular_Function	GO Cellular_Component
1	Large subunit	sp|A0T0X2.1|RK3_THAPS	RecName: Full=50S ribosomal protein L3, chloroplastic	22036.9	0.304	1	1	YP_874584.1;ABK20807.1	0.17	0.096	0.005515	-0.9	sp|A0T0X2.1|RK3_THAPS	MSLGLLGNKIGMTQIFDESGNIIPVTILKVGPCVITQVKTTLNDGYNAIQVGYGNVSTKALTQPQLGHLQKSNIQPLKYLKEFHVSDPTEFNVGQILNVESFVAGQLINVTGKSIGKGFSGLQKRYNFARGPMTHGSKNHRAPGSIGMGTSPGRVLPGKKMAGQLGNKTANIKKLKIVQVNNDENILVVKGAVPGKPGNLLSIIPSK	100	7e-147	gi|118411190|ref|YP_874584.1|	50S ribosomal protein L3 [Thalassiosira pseudonana]	100	1e-147	sp|A0T0X2|RK3_THAPS	50S ribosomal protein L3, chloroplastic OS=Thalassiosira pseudonana GN=rpl3 PE=3 SV=1	94.2	6e-138	tr|A0A089X984|A0A089X984_THAWE	50S ribosomal protein L3, chloroplastic OS=Thalassiosira weissflogii GN=rpl3 PE=3 SV=1	gi|428224235|ref|YP_007108332.1|	276	2e-93	COG0087	Ribosomal protein L3	J	Translation, ribosomal structure and biogenesis	K02906|1|2e-71|221|sind:105168351| large subunit ribosomal protein L3	GO:0006412//translation	GO:0003735//structural constituent of ribosome;GO:0019843//rRNA binding	GO:0005840//ribosome;GO:0009507//chloroplast
2		YP_009093501.1	ribosomal protein L3 (chloroplast) [Thalassiosira weissflogii]	22069.9	0.266	1	1	AIR76174.1	0.18	0.092	0.007034	-2.8	YP_009093501.1	MSLGLLGNKIGMTQIFDESGNIIPVTILKVGPCVITQVKTTLNDGYNAIQVGYGNVSPKSLTQPQLGHLQKSNIQPLKYLKEFRVSDPNNFNVGQVLNVESFVAGQLINVTGKSIGKGFSGLQKRHNFARGPMTHGSKNHRAPGSIGMGTSPGRVLPGKKMAGQLGNKTTNIRKLKIVQVNNDENILVVKGAIPGKPGNLVSIVPSK	100	4e-146	gi|700082703|ref|YP_009093501.1|	ribosomal protein L3 (chloroplast) [Thalassiosira weissflogii]	94.2	4e-140	sp|A0T0X2|RK3_THAPS	50S ribosomal protein L3, chloroplastic OS=Thalassiosira pseudonana GN=rpl3 PE=3 SV=1	100	1e-144	tr|A0A089X984|A0A089X984_THAWE	50S ribosomal protein L3, chloroplastic OS=Thalassiosira weissflogii GN=rpl3 PE=3 SV=1	gi|428314333|ref|YP_007125310.1|	278	2e-94	COG0087	Ribosomal protein L3	J	Translation, ribosomal structure and biogenesis	K02906|1|3e-74|228|sind:105168351| large subunit ribosomal protein L3	GO:0006412//translation	GO:0003735//structural constituent of ribosome;GO:0019843//rRNA binding	GO:0005840//ribosome;GO:0009507//chloroplast
3		YP_009093501.1	ribosomal protein L3 (chloroplast) [Thalassiosira weissflogii]	22069.9	0.266	1	1	AIR76174.1	0.18	0.092	0.007034	-1.9	YP_009093501.1	MSLGLLGNKIGMTQIFDESGNIIPVTILKVGPCVITQVKTTLNDGYNAIQVGYGNVSPKSLTQPQLGHLQKSNIQPLKYLKEFRVSDPNNFNVGQVLNVESFVAGQLINVTGKSIGKGFSGLQKRHNFARGPMTHGSKNHRAPGSIGMGTSPGRVLPGKKMAGQLGNKTTNIRKLKIVQVNNDENILVVKGAIPGKPGNLVSIVPSK	100	4e-146	gi|700082703|ref|YP_009093501.1|	ribosomal protein L3 (chloroplast) [Thalassiosira weissflogii]	94.2	4e-140	sp|A0T0X2|RK3_THAPS	50S ribosomal protein L3, chloroplastic OS=Thalassiosira pseudonana GN=rpl3 PE=3 SV=1	100	1e-144	tr|A0A089X984|A0A089X984_THAWE	50S ribosomal protein L3, chloroplastic OS=Thalassiosira weissflogii GN=rpl3 PE=3 SV=1	gi|428314333|ref|YP_007125310.1|	278	2e-94	COG0087	Ribosomal protein L3	J	Translation, ribosomal structure and biogenesis	K02906|1|3e-74|228|sind:105168351| large subunit ribosomal protein L3	GO:0006412//translation	GO:0003735//structural constituent of ribosome;GO:0019843//rRNA binding	GO:0005840//ribosome;GO:0009507//chloroplast
4		EED93172.1	RS20, ribosomal protein 20 40S small ribosomal subunit, partial [Thalassiosira pseudonana CCMP1335]	13743.4	0.161	2	7	XP_002289635.1	0.6	0.042	0.0006953	-1.1	EED93172.1	MSSYVPPGKKEAGLEADAGAQVHRIRITLTSRNVKNLEKVCADLKKGALDKKLNVSGPVRMPTKKLKITTRKAPSGEGTNTWDRFEMRIHKRLIDLHAPSDVVKQITSISIEPGVEVDVTINDR	100	2e-76	gi|223999925|ref|XP_002289635.1|	RS20, ribosomal protein 20 40S small ribosomal subunit [Thalassiosira pseudonana CCMP1335]	71.9	1e-49	sp|Q9STY6|RS202_ARATH	40S ribosomal protein S20-2 OS=Arabidopsis thaliana GN=RPS20B PE=2 SV=1	100	5e-75	tr|B8C138|B8C138_THAPS	RS20, ribosomal protein 20 40S small ribosomal subunit (Fragment) OS=Thalassiosira pseudonana GN=RS20 PE=3 SV=1	gi|530780468|ref|YP_008432275.1|	93.2	3e-24	COG0051	Ribosomal protein S10	J	Translation, ribosomal structure and biogenesis	K02969|1|2e-55|172|cre:CHLREDRAFT_195592| small subunit ribosomal protein S20e	GO:0006412//translation	GO:0003735//structural constituent of ribosome;GO:0003723//RNA binding	GO:0005730//nucleolus;GO:0005618//cell wall;GO:0022627//cytosolic small ribosomal subunit;GO:0016020//membrane
5		XP_002296141.1	RL3, ribosomal protein 3, 60S large ribosomal subunit [Thalassiosira pseudonana CCMP1335]	44739.7	0.025	1	2	ACI64858.1	0.33	0.231	0.03601	-2	XP_002296141.1	MSHRKFEAPRHGNLGFLPKKRTKHHSGRIRSFPKDNDASAPPHLTAFRAYKAGMTHVVRGVDRPGAVMHKREVVDAVSILETPPMVVVGVVGYLETPRGLRTLTTVFAEHLSEEFKRRAYKNWYKSKRKAYTKYAKKYTENDGKDIEKELERIAKHCKVVRVITHSQVKKLHLRIRKAHIMEVQINGGADAKAKVDFAKSLFEKEVTVDSVFAKDELIDVLGVTKGHGYEGVTTRWGVSRLPRKTHRGLRKVACIGSWHPARVSDTVPRAGQNGYHHRTEMNKKIYRIGKKGDNSSCQTDADLTEKSITPMGGFVHYGQIREDWVMIKGACVGVKKRPLILRKSLMKHSSRKHLESIDLRFIDTSSKLGHGRFQTAEEKAKFLGPLASSGANKSA	100	0	gi|224004980|ref|XP_002296141.1|	RL3, ribosomal protein 3, 60S large ribosomal subunit [Thalassiosira pseudonana CCMP1335]	63.94	4e-177	sp|P35684|RL3_ORYSJ	60S ribosomal protein L3 OS=Oryza sativa subsp. japonica GN=RPL3 PE=2 SV=2	100	0	tr|B5YMS4|B5YMS4_THAPS	RL3, ribosomal protein 3, 60S large ribosomal subunit OS=Thalassiosira pseudonana GN=RL3 PE=3 SV=1	gi|14520558|ref|NP_126033.1|	219	3e-66	COG0087	Ribosomal protein L3	J	Translation, ribosomal structure and biogenesis	K02925|1|0.0|518|egr:104420002| large subunit ribosomal protein L3e	GO:0006412//translation	GO:0003735//structural constituent of ribosome	GO:0005840//ribosome
6		XP_002290123.1	RL4e, ribosomal protein 4e 60S large ribosomal subunit [Thalassiosira pseudonana CCMP1335]	41232	0.188	3	11	EED91875.1	0.41	0.233	0.04179	-1.3	XP_002290123.1	MAARPLVSVFSLTGEKAGETTLPEVMTAPMRTDIVQFVHTNMNKNNRQAYAVNVHAGKLVSAESWGTGRAVARIPRVGGGGTSRSGQGAFGNMCRGGRMFAPTKTWRKWHRKINVTQKRYAVASALAATAVPALVMARGHKVDDVPEIPLVLDNTLESAKKTSAAKDILAAVGALADVEKAADSKKIRAGKGKARNRRYTLRRGPLVIYKSNDGVEQAFRNLPGVELCCVDRLNLLQLAPGGHMGRFCIWSQAALDALNTIYGKEGKSIPEDLMANADLARIINSDEIQSVLNPAKRANKKFLRKKNPLTSIKALAKLDPYAAAARESEQRAEAARKDQKAAILKKRRETAKEDSLIVVFAGVLKICSRLRMNIGTGI	100	0	gi|224000902|ref|XP_002290123.1|	RL4e, ribosomal protein 4e 60S large ribosomal subunit [Thalassiosira pseudonana CCMP1335]	60.19	8e-116	sp|Q9SF40|RL4A_ARATH	60S ribosomal protein L4-1 OS=Arabidopsis thaliana GN=RPL4A PE=1 SV=1	100	0	tr|B8C239|B8C239_THAPS	RL4e, ribosomal protein 4e 60S large ribosomal subunit OS=Thalassiosira pseudonana GN=RL4e PE=4 SV=1	gi|15678034|ref|NP_275148.1|	193	6e-58	COG0088	Ribosomal protein L4	J	Translation, ribosomal structure and biogenesis	K02930|1|2e-127|374|zma:100194262| large subunit ribosomal protein L4e	GO:0006412//translation	GO:0003735//structural constituent of ribosome	GO:0005840//ribosome;GO:0043231//intracellular membrane-bounded organelle
7		YP_009093505.1	ribosomal protein S19 (chloroplast) [Thalassiosira weissflogii]	10420.7	0.174	2	2	AIR75905.1;AIR76178.1;YP_009093232.1	0.35	0.191	0.02605	-1.5	YP_009093505.1	MSRSLKKGPFVAYHLLKKINKMNAEGKKDIITTWSRSSTILPNMVGFTIAVYNGKQHVPIFISDQLVGHKLGEFVSTRTFKSHIKADKKTKR	100	1e-62	gi|700082707|ref|YP_009093505.1|	ribosomal protein S19 (chloroplast) [Thalassiosira weissflogii]	95.65	3e-62	sp|A0T0X6|RR19_THAPS	30S ribosomal protein S19, chloroplastic OS=Thalassiosira pseudonana GN=rps19 PE=3 SV=1	100	3e-61	tr|A0A089VQH3|A0A089VQH3_THAWE	30S ribosomal protein S19, chloroplastic OS=Thalassiosira weissflogii GN=rps19 PE=3 SV=1	gi|434388537|ref|YP_007099148.1|	147	3e-46	COG0185	Ribosomal protein S19	J	Translation, ribosomal structure and biogenesis	K02965|1|1e-44|142|cre:ChreCp013| small subunit ribosomal protein S19	GO:0006412//translation	GO:0003735//structural constituent of ribosome;GO:0019843//rRNA binding	GO:0015935//small ribosomal subunit;GO:0009507//chloroplast;GO:0005739//mitochondrion
8		AIR75633.1	ribosomal protein S3 (chloroplast) [Cyclotella sp. WC03_2]	24119	0.089	1	1	-	0.34	0.071	0.001865	-0.9	AIR75633.1	MGQKTHPLGFRLGITQEHRSTWYTNFKHYPILLEEDDKIRTYLNKIAKLASISNIQINRNGLGDQIELNIETGRPGILVGDNGSNIKTLAANIKKIIPNNRQITINIVEVTNVNANASLIADLVVQQLEDRVAFRRAIREALQCAQDNQVNGIKIEVSGRLNGAEIARSEWIREGRVPLQTLRADIDYATKEANTIYGVLGVKVWLFKNEILKK	100	6e-155	gi|691190120|gb|AIR75633.1|	ribosomal protein S3 (chloroplast) [Cyclotella sp. WC03_2]	92.52	2e-145	sp|A0T0X9|RR3_THAPS	30S ribosomal protein S3, chloroplastic OS=Thalassiosira pseudonana GN=rps3 PE=3 SV=1	100	1e-153	tr|A0A089VNW1|A0A089VNW1_9STRA	30S ribosomal protein S3, chloroplastic OS=Cyclotella sp. WC03_2 GN=rps3 PE=3 SV=1	gi|427703075|ref|YP_007046297.1|	260	8e-87	COG0092	Ribosomal protein S3	J	Translation, ribosomal structure and biogenesis	K02982|1|2e-62|197|ppp:PhpapaCp067| small subunit ribosomal protein S3	GO:0006412//translation	GO:0003735//structural constituent of ribosome;GO:0019843//rRNA binding	GO:0015935//small ribosomal subunit;GO:0009507//chloroplast;GO:0005739//mitochondrion
9		EED93043.1	predicted protein [Thalassiosira pseudonana CCMP1335]	29295.4	0.33	1	4	XP_002289506.1	0.57	0.093	0.006045	-0.9	EED93043.1	MTMANRSKMSIKRRFVADGVFYAELNELLTRELAEDGYAGVEVRTTPHRTEIIIRATKTQNVLGEKGQRIRELTSVVQKRFDFAEGAVELYAERVQNRGLCAQAQAESLKFKLLAGLAVRRACYGVVRFVMEASAKGCEVIVSGKLRGQRAKGMKFGDGYMIKTGHAGQVYTDVAVRHVLMRQGVIGIKVAIMLPHDPKGVQGPKIPLDDVVTILEPKEEPSPESILQAQQAAEAAAAAAAQAALQQQLLAQQQAEMAAAGGAPAVDAGF	100	2e-166	gi|223999667|ref|XP_002289506.1|	predicted protein [Thalassiosira pseudonana CCMP1335]	75.23	7e-115	sp|Q9M339|RS32_ARATH	40S ribosomal protein S3-2 OS=Arabidopsis thaliana GN=RPS3B PE=1 SV=1	100	5e-165	tr|B8C0D4|B8C0D4_THAPS	Uncharacterized protein OS=Thalassiosira pseudonana GN=THAPSDRAFT_28049 PE=4 SV=1	gi|57641471|ref|YP_183949.1|	128	1e-34	COG0092	Ribosomal protein S3	J	Translation, ribosomal structure and biogenesis	K02985|1|3e-121|348|sbi:SORBI_02g038990| small subunit ribosomal protein S3e	GO:0006412//translation;GO:0009651//response to salt stress	GO:0003735//structural constituent of ribosome;GO:0003723//RNA binding	GO:0005730//nucleolus;GO:0022626//cytosolic ribosome;GO:0005773//vacuole;GO:0005886//plasma membrane;GO:0015935//small ribosomal subunit;GO:0009507//chloroplast
10		EJK45790.1	hypothetical protein THAOC_35575 [Thalassiosira oceanica]	29165.1	0.323	2	4	-	0.64	0.173	0.03634	-1.1	EJK45790.1	MMATRAKMSTKRKFVADGVFYAELNELLTRELAEDGYAGVEVRTTPHRTEIIIRATKTQNVLGEKGQRIRELTSVVQKRFDFAEGAVELYAERVQNRGLCAQAQAESLKFKLLAGLAVRRACYGVVRFVMEASAKGCEVIVSGKLRGQRAKAMKFGDGYMIKTGHAGQVYTDTAVRHVAMRQGMIGIKVSIMLPHDPKGQIGPKIPLDDVVTILEPKEEPSPEEILQQQQAAEAAAAAASAAALMAQQQEMLQQQAPVDPNVAAGY	100	2e-158	gi|397567805|gb|EJK45790.1|	hypothetical protein THAOC_35575 [Thalassiosira oceanica]	74.65	4e-115	sp|P47835|RS32_XENLA	40S ribosomal protein S3-B OS=Xenopus laevis GN=rps3-b PE=2 SV=1	100	6e-157	tr|K0R1I6|K0R1I6_THAOC	Uncharacterized protein OS=Thalassiosira oceanica GN=THAOC_35575 PE=4 SV=1	gi|57641471|ref|YP_183949.1|	128	9e-35	COG0092	Ribosomal protein S3	J	Translation, ribosomal structure and biogenesis	K02985|1|5e-121|348|sbi:SORBI_02g038990| small subunit ribosomal protein S3e	GO:0006412//translation;GO:0009651//response to salt stress	GO:0003735//structural constituent of ribosome;GO:0003723//RNA binding	GO:0005730//nucleolus;GO:0022626//cytosolic ribosome;GO:0005773//vacuole;GO:0005886//plasma membrane;GO:0015935//small ribosomal subunit;GO:0009507//chloroplast
11		YP_009093505.1	ribosomal protein S19 (chloroplast) [Thalassiosira weissflogii]	10420.7	0.174	2	2	AIR75905.1;AIR76178.1;YP_009093232.1	0.35	0.191	0.02605	-1.9	YP_009093505.1	MSRSLKKGPFVAYHLLKKINKMNAEGKKDIITTWSRSSTILPNMVGFTIAVYNGKQHVPIFISDQLVGHKLGEFVSTRTFKSHIKADKKTKR	100	1e-62	gi|700082707|ref|YP_009093505.1|	ribosomal protein S19 (chloroplast) [Thalassiosira weissflogii]	95.65	3e-62	sp|A0T0X6|RR19_THAPS	30S ribosomal protein S19, chloroplastic OS=Thalassiosira pseudonana GN=rps19 PE=3 SV=1	100	3e-61	tr|A0A089VQH3|A0A089VQH3_THAWE	30S ribosomal protein S19, chloroplastic OS=Thalassiosira weissflogii GN=rps19 PE=3 SV=1	gi|434388537|ref|YP_007099148.1|	147	3e-46	COG0185	Ribosomal protein S19	J	Translation, ribosomal structure and biogenesis	K02965|1|1e-44|142|cre:ChreCp013| small subunit ribosomal protein S19	GO:0006412//translation	GO:0003735//structural constituent of ribosome;GO:0019843//rRNA binding	GO:0015935//small ribosomal subunit;GO:0009507//chloroplast;GO:0005739//mitochondrion
12		ABK20818.1	50S ribosomal protein L14 (chloroplast) [Thalassiosira pseudonana]	13463.3	0.215	2	8	YP_004072632.1;YP_009093512.1;AIR76185.1;AIR75496.1;AIR75637.1;ADB27585.1;sp|A0T0Y3.1|RK14_THAPS;YP_874595.1	0.45	0.086	0.003446	-1.8	ABK20818.1	MIYPQTMLTVADNTGAKKIMCIRVLGGNRKYGKIGDTIIGVVKEAIPNMPIKKSDVVRAIIVRTSKTIRRADGMYIRFDDNAAVIVNMENNPRGTRVFGPVAREIRDKNFSKIVSLAPEVL	100	2e-82	gi|118411201|ref|YP_874595.1|	50S ribosomal protein L14 [Thalassiosira pseudonana]	100	3e-83	sp|A0T0Y3|RK14_THAPS	50S ribosomal protein L14, chloroplastic OS=Thalassiosira pseudonana GN=rpl14 PE=3 SV=1	99.17	2e-80	tr|A0A089VGW3|A0A089VGW3_9STRA	50S ribosomal protein L14, chloroplastic OS=Cyclotella sp. L04_2 GN=rpl14 PE=3 SV=1	gi|428320026|ref|YP_007117908.1|	191	6e-63	COG0093	Ribosomal protein L14	J	Translation, ribosomal structure and biogenesis	K02874|1|9e-61|185|ota:OstapCp37| large subunit ribosomal protein L14	GO:0006412//translation	GO:0003735//structural constituent of ribosome;GO:0019843//rRNA binding	GO:0015934//large ribosomal subunit;GO:0009507//chloroplast;GO:0005739//mitochondrion
13		EJK55222.1	hypothetical protein THAOC_25064 [Thalassiosira oceanica]	29612.8	0.08	1	5	-	0.61	0.056	0.0017	-1.2	EJK55222.1	MGRGPKKHLKRLNAPRHWNLGKMGGVWAPKPSAGPHKQRECLPVAIILRERLKYALTGKECQQICMERCVKIDGKVRTDYNYPAGFMDIVELEKSGDIFRLLYDTKGRFVLHRVDKKEAEWKLCRIQKVYVTAKKIPVAVTHDGRTLRFPDPNVKVNDTVKVNIATGKMGEIFPFEMGSVVMVTKGHNAGRVGILQHLEKHDGSFSIVTVKDKKGNVFATRQSNVFIIGAGERVELSLPKGRGIKKNIIQERAEAEARGDL	100	0	gi|397590955|gb|EJK55222.1|	hypothetical protein THAOC_25064 [Thalassiosira oceanica]	59.13	2e-115	sp|O62739|RS4Y1_MONDO	40S ribosomal protein S4, Y isoform 1 OS=Monodelphis domestica GN=RPS4Y1 PE=2 SV=3	100	0	tr|K0S927|K0S927_THAOC	40S ribosomal protein S4 OS=Thalassiosira oceanica GN=THAOC_25064 PE=3 SV=1	gi|347524208|ref|YP_004781778.1|	162	2e-47	COG1471	Ribosomal protein S4E	J	Translation, ribosomal structure and biogenesis	K02987|1|5e-115|333|vcn:VOLCADRAFT_82986| small subunit ribosomal protein S4e	GO:0006412//translation	GO:0003735//structural constituent of ribosome;GO:0003723//RNA binding	GO:0005840//ribosome;GO:0016020//membrane;GO:0009536//plastid;GO:0044446//intracellular organelle part
14		ADB27587.1	50S ribosomal protein L5 (chloroplast) [Thalassiosira oceanica CCMP1005]	27553.7	0.113	2	2	YP_004072634.1	0.54	0.161	0.02336	-3.3	ADB27587.1	MRSQHSLEEIAELYGLLENIKKEYENGIHSVLRKSNPELFSNPHTIPKLKKISINRGLGLAAQNSNILKKSITEFTRITGQKPLITRAKKAVAGFKIRENMELGLSSTLRGEKMYNFLTKLIFFTFAQIRDFRGLSVRSFDKAGNYTFSLKEQLIFPEIEYDDVDQIQGLSVTLVVDSSTPKARSKTIDRVLNGMILLKFLRFPLNDCGYYDKYSSFGEINQVWDKKKHLRRKRWSQE	100	4e-176	gi|315320577|ref|YP_004072634.1|	50S ribosomal protein L5 [Thalassiosira oceanica CCMP1005]	94.96	4e-170	sp|A0T0Y5|RK5_THAPS	50S ribosomal protein L5, chloroplastic OS=Thalassiosira pseudonana GN=rpl5 PE=3 SV=1	100	1e-174	tr|E7BWN0|E7BWN0_THAOC	50S ribosomal protein L5, chloroplastic OS=Thalassiosira oceanica GN=rpl5 PE=3 SV=1	gi|17231695|ref|NP_488243.1|	181	5e-56	COG0094	Ribosomal protein L5	J	Translation, ribosomal structure and biogenesis	K02931|1|2e-41|143|smo:SELMODRAFT_6364| large subunit ribosomal protein L5	GO:0006412//translation	GO:0003735//structural constituent of ribosome;GO:0019843//rRNA binding	GO:0005840//ribosome;GO:0009507//chloroplast;GO:0005739//mitochondrion
15		XP_002289769.1	RL11A, ribosomal protein 11A 60S large ribosomal subunit [Thalassiosira pseudonana CCMP1335]	20263.7	0.198	3	10	EED93306.1	0.42	0.113	0.006918	-2.7	XP_002289769.1	MASEGKKNPMKDIKVDKLILNCCVGESGDRLTRAARVLEQLTGQQPVYSKARYTLRSFGIRRNEKISVHVTVRGEKALEILERGLKVKEYELLQQNFSETGNFGFGINEHIDLGIKYDPTTGIYGMDFFVCLTRPGARVARRKVRQSRVGFAHKIKKEEAIQWFQDKFEGVVLAKAT	100	1e-129	gi|224000193|ref|XP_002289769.1|	RL11A, ribosomal protein 11A 60S large ribosomal subunit [Thalassiosira pseudonana CCMP1335]	72.88	7e-93	sp|Q0DK10|RL11_ORYSJ	60S ribosomal protein L11 OS=Oryza sativa subsp. japonica GN=RPL11 PE=2 SV=1	100	3e-128	tr|B8BZ86|B8BZ86_THAPS	RL11A, ribosomal protein 11A 60S large ribosomal subunit OS=Thalassiosira pseudonana GN=RL11A PE=3 SV=1	gi|332796541|ref|YP_004458041.1|	162	1e-49	COG0094	Ribosomal protein L5	J	Translation, ribosomal structure and biogenesis	K02868|1|3e-94|274|sot:102584982| large subunit ribosomal protein L11e	GO:0006412//translation	GO:0003735//structural constituent of ribosome	GO:0005840//ribosome
16		YP_009093242.1	ribosomal protein S8 (chloroplast) [Roundia cardiophora]	14928.1	0.258	2	5	AIR75915.1	0.39	0.136	0.0116	-2	YP_009093242.1	MVTDNIADMLTRIRNANMVKHQIVEIPATKMSKSIAIILKEEGFIENFEIYNENLYQYLLLSLKYKGQSRERVINKIKRISKPGLRVYANSKTLPNVLDGLGIAILSTSKGVITNIKAKELGIGGEVLCYIW	100	1e-77	gi|700658237|ref|YP_009093242.1|	ribosomal protein S8 (chloroplast) [Roundia cardiophora]	86.36	8e-68	sp|A0T0Y6|RR8_THAPS	30S ribosomal protein S8, chloroplastic OS=Thalassiosira pseudonana GN=rps8 PE=3 SV=1	100	4e-76	tr|A0A089VNH3|A0A089VNH3_9STRA	30S ribosomal protein S8, chloroplastic OS=Roundia cardiophora GN=rps8 PE=3 SV=1	gi|434391766|ref|YP_007126713.1|	177	5e-57	COG0096	Ribosomal protein S8	J	Translation, ribosomal structure and biogenesis	K02994|1|6e-39|130|ppp:PhpapaCp064| small subunit ribosomal protein S8	GO:0006412//translation	GO:0003735//structural constituent of ribosome;GO:0019843//rRNA binding	GO:0005840//ribosome;GO:0009507//chloroplast;GO:0005739//mitochondrion
17		EJK66240.1	hypothetical protein THAOC_12849 [Thalassiosira oceanica]	15096	0.069	1	7	EED90124.1;XP_002292928.1	0.6	0.021	8.435e-05	-1.9	EJK66240.1	MVRMSVLADCLKTITNAEKRGKRQVLIRPSSKVIVKFLQCMQQNGYIGEFEIVDDHRSQKIVVELNGRLNKCGVISPRFDVQVHEIEKWVVNLLPSRQFGQIILSTTYGIMTHEEARRKKTGGKILGFFY	100	6e-93	gi|397621341|gb|EJK66240.1|	hypothetical protein THAOC_12849 [Thalassiosira oceanica]	76.92	3e-71	sp|Q9AT34|RS15A_DAUCA	40S ribosomal protein S15a OS=Daucus carota GN=RPS15A PE=2 SV=3	100	1e-91	tr|K0SLR1|K0SLR1_THAOC	Uncharacterized protein OS=Thalassiosira oceanica GN=THAOC_12849 PE=3 SV=1	gi|297527392|ref|YP_003669416.1|	136	1e-40	COG0096	Ribosomal protein S8	J	Translation, ribosomal structure and biogenesis	K02957|1|3e-75|222|ccp:CHC_T00010168001| small subunit ribosomal protein S15Ae	GO:0006412//translation	GO:0003735//structural constituent of ribosome	GO:0005840//ribosome
18		YP_874599.1	50S ribosomal protein L6 (chloroplast) [Thalassiosira pseudonana]	20750.3	0.07	1	1	sp|A0T0Y7.1|RK6_THAPS;ABK20822.1	0.43	0.169	0.02108	-0.7	YP_874599.1	MSRIGKLPIKLPTTVEISHQSDATVQVINVKGKFGSLQRTLPEELKIEQIHNDNGSSLIVSFENQTRTNKSLQGLYRTLINNMVIGVTEQFVIILTLQGVGYRASVQGKSLVLNLGYSHPVEIDIPEGITVEVTQNTTLNIKACDKEQLGLFAAKVRAWRPPEPYKGKGILYKNEQILRKAGKSGKK	100	7e-135	gi|118411205|ref|YP_874599.1|	50S ribosomal protein L6 [Thalassiosira pseudonana]	100	1e-135	sp|A0T0Y7|RK6_THAPS	50S ribosomal protein L6, chloroplastic OS=Thalassiosira pseudonana GN=rpl6 PE=3 SV=1	73.8	1e-95	tr|A0A089X999|A0A089X999_THAWE	50S ribosomal protein L6, chloroplastic OS=Thalassiosira weissflogii GN=rpl6 PE=3 SV=1	gi|428305857|ref|YP_007142682.1|	182	3e-57	COG0097	Ribosomal protein L6P/L9E	J	Translation, ribosomal structure and biogenesis	K02933|1|1e-56|182|sot:102601925| large subunit ribosomal protein L6	GO:0006412//translation	GO:0003735//structural constituent of ribosome;GO:0019843//rRNA binding	GO:0005840//ribosome;GO:0009507//chloroplast;GO:0005739//mitochondrion
19		EJK58851.1	hypothetical protein THAOC_20986 [Thalassiosira oceanica]	25171.1	0.063	1	1	-	0.42	0.19	0.0272	-1.1	EJK58851.1	MQTSSSWSDRISFSNATNRPSQSEVGEAGMEVSRKQRKLCATHRRYEDPKPWSLGDGGEKDTEEIPDIWYPSLVGRKLPIFWEATMAGVQPLSKKTCVKKRTKKFARHQSDLFVRIRNSSWRKPKGIDGRVRRRFKGALPMPSIGYGSNKKTRNVLPCGFKSVVVANVSELEMLMMHNRTYAATVAHSVSSRVRRQIVERAEQLAIRVTNAAAKLRAEEDA	100	3e-155	gi|397605017|gb|EJK58851.1|	hypothetical protein THAOC_20986 [Thalassiosira oceanica]	62.96	1e-49	sp|P62912|RL32_RAT	60S ribosomal protein L32 OS=Rattus norvegicus GN=Rpl32 PE=1 SV=2	100	8e-154	tr|K0SD22|K0SD22_THAOC	Uncharacterized protein OS=Thalassiosira oceanica GN=THAOC_20986 PE=4 SV=1	gi|18978179|ref|NP_579536.1|	83.6	8e-19	COG1717	Ribosomal protein L32E	J	Translation, ribosomal structure and biogenesis	K02912|1|3e-48|158|cre:CHLREDRAFT_191758| large subunit ribosomal protein L32e	GO:0006412//translation	GO:0046872//metal ion binding;GO:0003735//structural constituent of ribosome	GO:0005840//ribosome
20		EED94963.1	RL19, ribosomal protein 19 60S large ribosomal subunit [Thalassiosira pseudonana CCMP1335]	21300.1	0.092	1	1	XP_002287520.1;EJK50163.1	0.73	0.124	0.03159	-0.5	EED94963.1	MVSLKLQKRLAASVLKCGKRKIWLDPNEINEISLANSRRNIARLEKDGLIMKKPAVVHSRSRVNARLEAKRKGRHTGIGKRRGTANARLPFKVIWMRRIRVLRRLLHKMRDAKKIDKHIYHTLYLHAKGNQFKNKRVLLETIHTMKAEKAQTKALADQAEAKKSRARARVARRAAKEAKGKEDQ	100	2e-111	gi|223995693|ref|XP_002287520.1|	RL19, ribosomal protein 19 60S large ribosomal subunit [Thalassiosira pseudonana CCMP1335]	70.89	1e-76	sp|P36241|RL19_DROME	60S ribosomal protein L19 OS=Drosophila melanogaster GN=RpL19 PE=1 SV=2	100	6e-110	tr|B8BVM9|B8BVM9_THAPS	Ribosomal protein L19 OS=Thalassiosira pseudonana GN=RL19 PE=3 SV=1	gi|57641458|ref|YP_183936.1|	134	1e-38	COG2147	Ribosomal protein L19E	J	Translation, ribosomal structure and biogenesis	K02885|1|3e-76|230|crb:CARUB_v10014622mg| large subunit ribosomal protein L19e	GO:0006412//translation	GO:0003735//structural constituent of ribosome	GO:0005840//ribosome;GO:0005739//mitochondrion
21		AIR75501.1	ribosomal protein L18 (chloroplast) [Cyclotella sp. L04_2]	15497.6	0.074	1	2	AIR75642.1;YP_004072637.1;ADB27590.1	0.28	0.096	0.004805	-0.9	AIR75501.1	MKFSKRVLLRLKNKNKKLKPDKYKKLKRESVRGLIKGTLERPRLSVFRSNENIYAQIIDDLTSKTLVSCSTLDRDIKLNSENGRTCNASRLMGEKLANLSKKKNITKIVFDRGPYLYHGRIKALADGARAGGLQF	100	3e-73	gi|691189987|gb|AIR75501.1|	ribosomal protein L18 (chloroplast) [Cyclotella sp. L04_2]	92.52	6e-68	sp|A0T0Y8|RK18_THAPS	50S ribosomal protein L18, chloroplastic OS=Thalassiosira pseudonana GN=rpl18 PE=3 SV=1	100	8e-72	tr|A0A089VGW9|A0A089VGW9_9STRA	50S ribosomal protein L18, chloroplastic OS=Cyclotella sp. L04_2 GN=rpl18 PE=3 SV=1	gi|430748630|ref|YP_007211538.1|	128	2e-37	COG0256	Ribosomal protein L18	J	Translation, ribosomal structure and biogenesis	K02881|1|4e-34|119|vcn:VOLCADRAFT_103908| large subunit ribosomal protein L18	GO:0006412//translation	GO:0003735//structural constituent of ribosome;GO:0019843//rRNA binding	GO:0005840//ribosome;GO:0009507//chloroplast
22		EED94963.1	RL19, ribosomal protein 19 60S large ribosomal subunit [Thalassiosira pseudonana CCMP1335]	21300.1	0.092	1	1	XP_002287520.1;EJK50163.1	0.73	0.124	0.03159	-1.2	EED94963.1	MVSLKLQKRLAASVLKCGKRKIWLDPNEINEISLANSRRNIARLEKDGLIMKKPAVVHSRSRVNARLEAKRKGRHTGIGKRRGTANARLPFKVIWMRRIRVLRRLLHKMRDAKKIDKHIYHTLYLHAKGNQFKNKRVLLETIHTMKAEKAQTKALADQAEAKKSRARARVARRAAKEAKGKEDQ	100	2e-111	gi|223995693|ref|XP_002287520.1|	RL19, ribosomal protein 19 60S large ribosomal subunit [Thalassiosira pseudonana CCMP1335]	70.89	1e-76	sp|P36241|RL19_DROME	60S ribosomal protein L19 OS=Drosophila melanogaster GN=RpL19 PE=1 SV=2	100	6e-110	tr|B8BVM9|B8BVM9_THAPS	Ribosomal protein L19 OS=Thalassiosira pseudonana GN=RL19 PE=3 SV=1	gi|57641458|ref|YP_183936.1|	134	1e-38	COG2147	Ribosomal protein L19E	J	Translation, ribosomal structure and biogenesis	K02885|1|3e-76|230|crb:CARUB_v10014622mg| large subunit ribosomal protein L19e	GO:0006412//translation	GO:0003735//structural constituent of ribosome	GO:0005840//ribosome;GO:0005739//mitochondrion
23		AIR75501.1	ribosomal protein L18 (chloroplast) [Cyclotella sp. L04_2]	15497.6	0.074	1	2	AIR75642.1;YP_004072637.1;ADB27590.1	0.28	0.096	0.004805	-2.1	AIR75501.1	MKFSKRVLLRLKNKNKKLKPDKYKKLKRESVRGLIKGTLERPRLSVFRSNENIYAQIIDDLTSKTLVSCSTLDRDIKLNSENGRTCNASRLMGEKLANLSKKKNITKIVFDRGPYLYHGRIKALADGARAGGLQF	100	3e-73	gi|691189987|gb|AIR75501.1|	ribosomal protein L18 (chloroplast) [Cyclotella sp. L04_2]	92.52	6e-68	sp|A0T0Y8|RK18_THAPS	50S ribosomal protein L18, chloroplastic OS=Thalassiosira pseudonana GN=rpl18 PE=3 SV=1	100	8e-72	tr|A0A089VGW9|A0A089VGW9_9STRA	50S ribosomal protein L18, chloroplastic OS=Cyclotella sp. L04_2 GN=rpl18 PE=3 SV=1	gi|430748630|ref|YP_007211538.1|	128	2e-37	COG0256	Ribosomal protein L18	J	Translation, ribosomal structure and biogenesis	K02881|1|4e-34|119|vcn:VOLCADRAFT_103908| large subunit ribosomal protein L18	GO:0006412//translation	GO:0003735//structural constituent of ribosome;GO:0019843//rRNA binding	GO:0005840//ribosome;GO:0009507//chloroplast
24		EJK70557.1	hypothetical protein THAOC_08069 [Thalassiosira oceanica]	35480.8	0.157	1	2	-	0.52	0.117	0.009422	-0.3	EJK70557.1	MPFVKIQKSKSYYKRYQVKFRRRREGKTDYRQRKRLCCQAKNKYQSPKYRFVVRFTNRQVICQIAYTLIDGDRILTSASSNELPRYGLSCGLKNYGAAYCTGLLCARRLLQKVGLDDVYEGNDEIDGEVVKTEVGKTTYYVDEVDEDKRPFRALLDVGCKTTSTGCRIFGALKGAADGGLDIPHSEKRFPGYDRDSKEYDADMHRERIFGGHVGEYMEYLEEEDNTKYQEQFAGYIAAGIDADGLEELYEGVHEKIREDPSPSEKKSFTPDKSFKRKAKLTLEQRKAAVQAKKDAKIAELEEDDE	100	0	gi|397632449|gb|EJK70557.1|	hypothetical protein THAOC_08069 [Thalassiosira oceanica]	53.77	4e-99	sp|Q4KTI3|RL5_SUBDO	60S ribosomal protein L5 OS=Suberites domuncula GN=RPL5 PE=2 SV=1	100	0	tr|K0TJ10|K0TJ10_THAOC	Uncharacterized protein OS=Thalassiosira oceanica GN=THAOC_08069 PE=3 SV=1	gi|312137095|ref|YP_004004432.1|	135	2e-37	COG0256	Ribosomal protein L18	J	Translation, ribosomal structure and biogenesis	K02932|1|3e-105|311|smo:SELMODRAFT_154687| large subunit ribosomal protein L5e	GO:0006412//translation	GO:0008097//5S rRNA binding;GO:0003735//structural constituent of ribosome	GO:0005840//ribosome
25		EJK58017.1	hypothetical protein THAOC_21891 [Thalassiosira oceanica]	27749.6	0.186	1	4	-	0.39	0.138	0.01214	-1.1	EJK58017.1	MSEERGRGGFGRGRGRGRGRGRGRGRGGGREENVWVPVTKLGRLVKEGKIGSIEEIFLFSIPVKEAEIIDYFLKDKLQDEVMKIMPVQKQSSAGQRTRFKAFVAVGDGAGHIGLGVKCSSEVATAIRGAILAAKLNVTPVRRGYWGRKSGMPHTVPTKVTGKCGSVRVRLIPAPRGTGLVSSPAGKRLLSMAGMDDCYTSTRGHTRTMGNFIKALFYALRNTYGYLEPDLWKENALTATPFQEHTDFLSKKAI	100	7e-165	gi|397601862|gb|EJK58017.1|	hypothetical protein THAOC_21891 [Thalassiosira oceanica]	73.15	4e-117	sp|P31009|RS2_DROME	40S ribosomal protein S2 OS=Drosophila melanogaster GN=RpS2 PE=1 SV=2	100	2e-163	tr|K0SHL7|K0SHL7_THAOC	Uncharacterized protein OS=Thalassiosira oceanica GN=THAOC_21891 PE=3 SV=1	gi|156938063|ref|YP_001435859.1|	184	2e-56	COG0098	Ribosomal protein S5	J	Translation, ribosomal structure and biogenesis	K02981|1|7e-114|330|csl:COCSUDRAFT_64056| small subunit ribosomal protein S2e	GO:0006412//translation	GO:0003735//structural constituent of ribosome;GO:0003723//RNA binding	GO:0015935//small ribosomal subunit
26		EED89940.1	RS2, ribosomal protein 2 [Thalassiosira pseudonana CCMP1335]	28822.3	0.252	2	6	XP_002292744.1	0.58	0.172	0.0326	-0.9	EED89940.1	MSEERGGFGRGRGERGRGRGRGDRGRGRGRGRGREGGRDENVWVPVTKLGRLVKEGKIGSIEEIFLFSIPVKEAEIIDYFLKDKLQDEVMKIMPVQKQSSAGQRTRFKAFVAVGDAAGHIGLGVKCSSEVATAIRGAILAAKLNIAPVRRGYWGRKASAPHTVPTKVTGKCGSVRVRLIPAPRGTGLVSSPAGKRLLSMAGIEDCYTSTRGHTRTMGNFIKALFYALRNTYGYLEPDLWKENVLTAAPFQEHTDFLSKKQIK	100	3e-163	gi|224007569|ref|XP_002292744.1|	RS2, ribosomal protein 2 [Thalassiosira pseudonana CCMP1335]	72.69	8e-116	sp|P31009|RS2_DROME	40S ribosomal protein S2 OS=Drosophila melanogaster GN=RpS2 PE=1 SV=2	100	7e-162	tr|B8C8V8|B8C8V8_THAPS	RS2, ribosomal protein 2 OS=Thalassiosira pseudonana GN=RS2 PE=3 SV=1	gi|307595035|ref|YP_003901352.1|	186	3e-57	COG0098	Ribosomal protein S5	J	Translation, ribosomal structure and biogenesis	K02981|1|3e-112|327|csl:COCSUDRAFT_64056| small subunit ribosomal protein S2e	GO:0006412//translation	GO:0003735//structural constituent of ribosome;GO:0003723//RNA binding	GO:0005730//nucleolus;GO:0005886//plasma membrane;GO:0005618//cell wall;GO:0022627//cytosolic small ribosomal subunit;GO:0009507//chloroplast
27		EJK47098.1	hypothetical protein THAOC_34210 [Thalassiosira oceanica]	27021.6	0.304	3	17	-	0.55	0.067	0.00217	-0.6	EJK47098.1	MVKTPESVLKKQATQAKIAEQAKQACYEAKQKKRQNKKDAIAAAEKYAAEYKAADEASVANRRQAKAQGGFYVPAQPKIALIIRIRGIIGVSPKAKKIMQLFRLRQIHNATFVKLNESTIRMLRLIEPYVTYGYPTRTTIEKLIYKRGFGKLNKQRIPIADNSVIEEGVGSVGIKCCADLIHEISTVGPHFKEANNFLWPFKLTSPRGGFSNKTKLVHFLEGGEAGNRGEEINKLVKRMI	100	5e-150	gi|397569999|gb|EJK47098.1|	hypothetical protein THAOC_34210 [Thalassiosira oceanica]	53.36	6e-76	sp|P60040|RL72_ARATH	60S ribosomal protein L7-2 OS=Arabidopsis thaliana GN=RPL7B PE=1 SV=1	100	1e-148	tr|K0R2W9|K0R2W9_THAOC	Uncharacterized protein OS=Thalassiosira oceanica GN=THAOC_34210 PE=4 SV=1	gi|347524218|ref|YP_004781788.1|	77	1e-15	COG1841	Ribosomal protein L30/L7E	J	Translation, ribosomal structure and biogenesis	K02937|1|3e-80|244|pda:103714103| large subunit ribosomal protein L7e	GO:0006412//translation	GO:0003735//structural constituent of ribosome	GO:0005840//ribosome
28		EED95018.1	RL17A, ribosomal protein 27A 60S large ribosomal subunit [Thalassiosira pseudonana CCMP1335]	16118.7	0.061	1	4	XP_002287575.1	0.51	0.204	0.03452	-1.7	EED95018.1	MPTRLHKGRKKRGHVQMGHGRIGKHRKHPGGRGNAGGQHHHRILFDKYHPGYFGKVGMRQFHQLKNRSFTPTLNIDKLFNVAGEGVYEAAKSASDGKAPVIDLVSKGYFKLLGNGQITVPVIVKAKFFSKLAEQKIKAAGGACLLAA	100	1e-103	gi|223995803|ref|XP_002287575.1|	RL17A, ribosomal protein 27A 60S large ribosomal subunit [Thalassiosira pseudonana CCMP1335]	64.86	1e-64	sp|P18445|RL27A_RAT	60S ribosomal protein L27a OS=Rattus norvegicus GN=Rpl27a PE=1 SV=3	100	3e-102	tr|B8BVY6|B8BVY6_THAPS	RL17A, ribosomal protein 27A 60S large ribosomal subunit OS=Thalassiosira pseudonana GN=RL27A PE=3 SV=1	gi|557693917|ref|YP_008796971.1|	79.3	6e-18	COG0200	Ribosomal protein L15	J	Translation, ribosomal structure and biogenesis	K02900|1|2e-66|201|olu:OSTLU_27402| large subunit ribosomal protein L27Ae	GO:0006412//translation	GO:0003735//structural constituent of ribosome	GO:0005840//ribosome
29		EED93401.1	RL34, ribosomal protein 34 60S large ribosomal subunit [Thalassiosira pseudonana CCMP1335]	12876	0.071	1	8	XP_002289864.1;EJK74030.1	0.37	0.168	0.01916	-0.9	EED93401.1	MVDHRVTRAGRHSYSTRSNRIRTIRTPGGRHVAQKIVKTSKGPRCSDCKCALPGIKHLKATAYKNLKKRERTVSRAYGGSACGGCVKQRIVRAFLLEEQKAVKKLLAERASKK	100	2e-66	gi|224000383|ref|XP_002289864.1|	RL34, ribosomal protein 34 60S large ribosomal subunit [Thalassiosira pseudonana CCMP1335]	55.34	2e-26	sp|Q54LV8|RL34_DICDI	60S ribosomal protein L34 OS=Dictyostelium discoideum GN=rpl34 PE=3 SV=1	100	4e-65	tr|B8BZT2|B8BZT2_THAPS	RL34, ribosomal protein 34 60S large ribosomal subunit OS=Thalassiosira pseudonana GN=RL34 PE=4 SV=1	-	-	-	-	-	-	-	K02915|1|1e-23|90.9|gsl:Gasu_19110| large subunit ribosomal protein L34e	GO:0006412//translation	GO:0003735//structural constituent of ribosome	GO:0005840//ribosome
30		EJK50611.1	hypothetical protein THAOC_30354, partial [Thalassiosira oceanica]	5012.51	0.261	1	5	EJK48626.1;EJK72485.1	0.49	0.009	5.028e-06	-0.4	EJK50611.1	MGFSRYVEVGRVVYINYGADAGKIATVIDIVDQNKCLVDGPEEITG	100	2e-27	gi|397636985|gb|EJK72485.1|	hypothetical protein THAOC_05982 [Thalassiosira oceanica]	59.52	1e-14	sp|Q9T043|RL142_ARATH	60S ribosomal protein L14-2 OS=Arabidopsis thaliana GN=RPL14B PE=1 SV=1	100	5e-26	tr|K0T455|K0T455_THAOC	Uncharacterized protein OS=Thalassiosira oceanica GN=THAOC_05982 PE=4 SV=1	-	-	-	-	-	-	-	K02875|1|2e-14|65.1|ath:AT4G27090| large subunit ribosomal protein L14e	GO:0001510//RNA methylation;GO:0006412//translation;GO:0042254//ribosome biogenesis	GO:0003735//structural constituent of ribosome	GO:0005730//nucleolus;GO:0009506//plasmodesma;GO:0005774//vacuolar membrane;GO:0009507//chloroplast;GO:0022625//cytosolic large ribosomal subunit;GO:0005783//endoplasmic reticulum;GO:0005794//Golgi apparatus
31		EED94570.1	RS18, ribosomal protein 18 40S small ribosomal subunit [Thalassiosira pseudonana CCMP1335]	17244.2	0.205	3	9	XP_002287127.1	0.42	0.105	0.005631	-2.1	EED94570.1	MSMSMMQGPEFQHILRILNTNVEGKRNVVFGLTKIKGLGRRFADLICKKAEIDVNKRAGELTADEIEKLVAIIQNPRQFKIPLWFLNRQKDFKTGKYSQVFAQNFDAKLRDDIERMKKIRAHRGLRHWWGIRVRGQHTCSTGRRKH	100	9e-106	gi|223994887|ref|XP_002287127.1|	RS18, ribosomal protein 18 40S small ribosomal subunit [Thalassiosira pseudonana CCMP1335]	68.31	2e-73	sp|P34788|RS18_ARATH	40S ribosomal protein S18 OS=Arabidopsis thaliana GN=RPS18A PE=1 SV=1	100	2e-104	tr|B8BTA9|B8BTA9_THAPS	RS18, ribosomal protein 18 40S small ribosomal subunit OS=Thalassiosira pseudonana GN=RS18 PE=3 SV=1	gi|294495901|ref|YP_003542394.1|	127	1e-36	COG0099	Ribosomal protein S13	J	Translation, ribosomal structure and biogenesis	K02964|1|7e-75|223|pop:POPTR_0005s23280g| small subunit ribosomal protein S18e	GO:0006412//translation	GO:0003735//structural constituent of ribosome;GO:0003723//RNA binding	GO:0005730//nucleolus;GO:0005773//vacuole;GO:0005886//plasma membrane;GO:0005618//cell wall;GO:0022627//cytosolic small ribosomal subunit
32		YP_009093249.1	ribosomal protein S11 (chloroplast) [Roundia cardiophora]	13802.4	0.185	2	7	AIR75506.1;AIR75647.1;AIR75922.1	0.45	0.175	0.02538	-1.1	YP_009093249.1	MAQKIRKSTVKKNRSNLGTGVVHIQSTFNNTIVTITNITGDTISWASSGSSGFKGARKGTPFAAQTAAEKAALEALSTGIKTVEILVKGQGSGRETAIRSIEGAGLEILSIQDITPVPHNGCRPRKRRRV	98.46	8e-62	gi|700082724|ref|YP_009093522.1|	ribosomal protein S11 (chloroplast) [Thalassiosira weissflogii]	94.62	3e-59	sp|A0T0Z3|RR11_THAPS	30S ribosomal protein S11, chloroplastic OS=Thalassiosira pseudonana GN=rps11 PE=3 SV=1	98.46	2e-60	tr|A0A089VPD1|A0A089VPD1_THAWE	30S ribosomal protein S11, chloroplastic OS=Thalassiosira weissflogii GN=rps11 PE=3 SV=1	gi|428777703|ref|YP_007169490.1|	182	7e-59	COG0100	Ribosomal protein S11	J	Translation, ribosomal structure and biogenesis	K02948|1|4e-28|103|ppp:PhpapaCp061| small subunit ribosomal protein S11		GO:0003723//RNA binding	GO:0030529//ribonucleoprotein complex;GO:0009536//plastid
33		EJK71823.1	hypothetical protein THAOC_06697 [Thalassiosira oceanica]	21752.8	0.179	2	6	-	0.51	0.155	0.02269	-2.1	EJK71823.1	MPTNAQHRNYRKTYKTPRRPYEKERLDAELKLVGEYGLRCKREIWRVQYALAKLRKAARVLLTLDPKDPKRIFEGAALLRRMSRYGLLADDELELDFVLQLTTQKLLERRLQTKVFKQGLAKSIHHARVLIRQRHISVGGQLVNVPSFNVRTSSEKHIDISANSPYGQGAPGRVAKKRAAAKAAAGEDDE	100	3e-117	gi|397635346|gb|EJK71823.1|	hypothetical protein THAOC_06697 [Thalassiosira oceanica]	73.21	1e-80	sp|Q9FLF0|RS92_ARATH	40S ribosomal protein S9-2 OS=Arabidopsis thaliana GN=RPS9C PE=1 SV=1	100	7e-116	tr|K0SZN6|K0SZN6_THAOC	Uncharacterized protein OS=Thalassiosira oceanica GN=THAOC_06697 PE=3 SV=1	gi|557695036|ref|YP_008798090.1|	127	7e-36	COG0522	Ribosomal protein S4 or related protein	J	Translation, ribosomal structure and biogenesis	K02997|1|8e-83|246|cre:CHLREDRAFT_195593| small subunit ribosomal protein S9e	GO:0006412//translation	GO:0003735//structural constituent of ribosome;GO:0019843//rRNA binding	GO:0015935//small ribosomal subunit;GO:0016020//membrane;GO:0009536//plastid;GO:0071944//cell periphery
34		ACI64872.1	RL18, ribosomal protein 18, 60S large ribosomal subunit [Thalassiosira pseudonana CCMP1335]	21446.6	0.068	1	3	XP_002296155.1	0.47	0.164	0.01957	-2.6	ACI64872.1	MGIDLKAGGRRTGHKSSMKVIKTQNPYSRLLIKLYKFLSRRTDSKFCATVAKRLHMSKTNAPPIGLNRLAKYMTNKSDKTAVIVGKVTDDVRMLECPKMSVCAISFTENARKRIVAAGGECITLDQLALRAPTGANTVLLRGPASREALAHFGKRTSVTNPHAYDGVKPFVRSKGRKFEKARGRRKSRGFKV	100	7e-140	gi|224005008|ref|XP_002296155.1|	RL18, ribosomal protein 18, 60S large ribosomal subunit [Thalassiosira pseudonana CCMP1335]	59.07	5e-71	sp|P42791|RL182_ARATH	60S ribosomal protein L18-2 OS=Arabidopsis thaliana GN=RPL18B PE=1 SV=2	100	2e-138	tr|B5YMU6|B5YMU6_THAPS	RL18, ribosomal protein 18, 60S large ribosomal subunit OS=Thalassiosira pseudonana GN=RL18 PE=4 SV=1	gi|336121978|ref|YP_004576753.1|	59.3	4e-10	COG1727	Ribosomal protein L18E	J	Translation, ribosomal structure and biogenesis	K02883|1|2e-77|233|ppp:PHYPADRAFT_162579| large subunit ribosomal protein L18e	GO:0006412//translation	GO:0003735//structural constituent of ribosome	GO:0022626//cytosolic ribosome;GO:0043231//intracellular membrane-bounded organelle;GO:0016020//membrane
35		ABK20830.1	50S ribosomal protein L13 (chloroplast) [Thalassiosira pseudonana]	15722.5	0.088	1	1	YP_874607.1;AIR76197.1;YP_009093524.1	0.33	0.113	0.006501	-0.2	ABK20830.1	MNKTFIPASNYNKRKWYVIDCKDRQLGRLASTIVPLLTGKSKPIYHPSVDVGDYVILINTEYLKLDREIERFHVFEPGRPGSSLKRLVNVAPKRIIESCVFNMLPNGFPKKHLVKRLKVYQGTEHPHVAQAPQVIL	100	8e-98	gi|118411213|ref|YP_874607.1|	50S ribosomal protein L13 [Thalassiosira pseudonana]	52.27	3e-47	sp|P49551|RK13_ODOSI	50S ribosomal protein L13, chloroplastic OS=Odontella sinensis GN=rpl13 PE=3 SV=1	100	2e-96	tr|A0T0Z5|A0T0Z5_THAPS	50S ribosomal protein L13, chloroplastic OS=Thalassiosira pseudonana GN=rpl13 PE=3 SV=1	gi|428305844|ref|YP_007142669.1|	124	1e-35	COG0102	Ribosomal protein L13	J	Translation, ribosomal structure and biogenesis	K02871|1|9e-30|108|ppp:PHYPADRAFT_35792| large subunit ribosomal protein L13	GO:0006412//translation	GO:0003735//structural constituent of ribosome	GO:0005840//ribosome;GO:0009507//chloroplast
36		YP_004072644.1	50S ribosomal protein L13 (chloroplast) [Thalassiosira oceanica CCMP1005]	15949.6	0.101	1	1	ADB27597.1	0.38	0.164	0.01862	-0.3	YP_004072644.1	MNKTFIPSTNYNKRKWYVIDCKDKQLGRLASSIVPLLTGKTKSIYHPSLDVGDYVILINSEELKIDRDVERFHVYEPGRPGSSLKRLVNILPKRIIENCVFNMLPNGFPKKHLVKRLKVYQGAVHPHAAQDPKVLEII	100	1e-98	gi|315320587|ref|YP_004072644.1|	50S ribosomal protein L13 [Thalassiosira oceanica CCMP1005]	51.47	8e-48	sp|P49551|RK13_ODOSI	50S ribosomal protein L13, chloroplastic OS=Odontella sinensis GN=rpl13 PE=3 SV=1	100	3e-97	tr|E7BWP0|E7BWP0_THAOC	50S ribosomal protein L13, chloroplastic OS=Thalassiosira oceanica GN=rpl13 PE=3 SV=1	gi|428305844|ref|YP_007142669.1|	130	4e-38	COG0102	Ribosomal protein L13	J	Translation, ribosomal structure and biogenesis	K02871|1|8e-30|109|ppp:PHYPADRAFT_47260| large subunit ribosomal protein L13	GO:0006412//translation	GO:0003735//structural constituent of ribosome	GO:0005840//ribosome;GO:0009507//chloroplast
37		EJK61308.1	hypothetical protein THAOC_18233 [Thalassiosira oceanica]	16152.7	0.252	2	9	-	0.31	0.139	0.01381	1.1	EJK61308.1	MPEVQSVQVFGKKKTATACAFAKQGRGLIKVNGQPIELIEPECLRLKAFEPVLILGQDKFANLDIRIRVKGGGMTAQMYAIRSAIAKSIVAYYAKYVDESAKNELRATLLAYDRNLLVADPRRREPKKYGGRSARARFQKSYR	100	4e-90	gi|397611399|gb|EJK61308.1|	hypothetical protein THAOC_18233 [Thalassiosira oceanica]	66.9	8e-62	sp|O22647|RS16_FRIAG	40S ribosomal protein S16 OS=Fritillaria agrestis GN=RPS16 PE=2 SV=1	100	9e-89	tr|K0S5F2|K0S5F2_THAOC	Uncharacterized protein OS=Thalassiosira oceanica GN=THAOC_18233 PE=3 SV=1	gi|397772874|ref|YP_006540420.1|	136	1e-40	COG0103	Ribosomal protein S9	J	Translation, ribosomal structure and biogenesis	K02960|1|2e-64|196|mpp:MICPUCDRAFT_62402| small subunit ribosomal protein S16e	GO:0006412//translation	GO:0003735//structural constituent of ribosome	GO:0005840//ribosome
38		XP_002289796.1	RS16, ribosomal protein 16 40S small ribosomal subunit [Thalassiosira pseudonana CCMP1335]	16173.7	0.252	2	9	EED93333.1	0.4	0.169	0.01913	-0.3	XP_002289796.1	MPESQSVQVFGKKKTATACAFAKQGRGLIKVNGQPIENIEPECLRLKAFEPVLVLGQDKFANLDIRIRVKGGGFTAQIYAIRSAIAKSIIAYYAKYVDESSKNELRATLMAYDRNLLVADPRRREPKKYGGRSARARFQKSYR	100	8e-74	gi|224000247|ref|XP_002289796.1|	RS16, ribosomal protein 16 40S small ribosomal subunit [Thalassiosira pseudonana CCMP1335]	66.2	6e-47	sp|O22647|RS16_FRIAG	40S ribosomal protein S16 OS=Fritillaria agrestis GN=RPS16 PE=2 SV=1	100	2e-72	tr|B8BZD7|B8BZD7_THAPS	RS16, ribosomal protein 16 40S small ribosomal subunit OS=Thalassiosira pseudonana GN=RS16 PE=3 SV=1	gi|397772874|ref|YP_006540420.1|	134	1e-39	COG0103	Ribosomal protein S9	J	Translation, ribosomal structure and biogenesis	K02960|1|6e-49|157|mpp:MICPUCDRAFT_62402| small subunit ribosomal protein S16e			GO:0030529//ribonucleoprotein complex
39		XP_002293898.1	RS5, ribosomal protein 5 [Thalassiosira pseudonana CCMP1335]	24648.7	0.133	1	4	EED88907.1	0.33	0.099	0.003581	-1.1	XP_002293898.1	MADVEDPIEEPVEVEEEEEEEFVAVGGATEVKLFGKWSFDDIEIRDISLVDYIACKGDHATYLPHTAGRYQKKRFRKASCPIVERLACCLMRKGRNSGKKLMAVRIVQHTLEIIHLLTDQNPVQVVVDAIINSGPREDSTRVGGAGVVRRQAVDMSPFRRVNYALYLLATGAREASFRNLKTVAECLAEELVNAARGSSNSYAIKKKDEIERVSKSNR	100	5e-128	gi|224009880|ref|XP_002293898.1|	RS5, ribosomal protein 5 [Thalassiosira pseudonana CCMP1335]	73.94	5e-99	sp|O65731|RS5_CICAR	40S ribosomal protein S5 (Fragment) OS=Cicer arietinum GN=RPS5 PE=2 SV=1	100	1e-126	tr|B8CC69|B8CC69_THAPS	RS5, ribosomal protein 5 OS=Thalassiosira pseudonana GN=RS5 PE=3 SV=1	gi|124028426|ref|YP_001013746.1|	204	4e-65	COG0049	Ribosomal protein S7	J	Translation, ribosomal structure and biogenesis	K02989|1|8e-103|298|vcn:VOLCADRAFT_120316| small subunit ribosomal protein S5e	GO:0006412//translation	GO:0003735//structural constituent of ribosome;GO:0003723//RNA binding	GO:0022626//cytosolic ribosome;GO:0005773//vacuole;GO:0005886//plasma membrane;GO:0005618//cell wall;GO:0015935//small ribosomal subunit;GO:0009507//chloroplast
40		EED91852.1	RS23, ribosomal protein 23 40S small ribosomal subunit [Thalassiosira pseudonana CCMP1335]	15876.6	0.154	2	3	EJK47606.1;XP_002290100.1	0.48	0.178	0.02655	-0.6	EED91852.1	MGKPAGIRTGRKLRIHRRNQRWHDLKYTKAHSVTAMKANPMGGSTMAKGIVLEKIGIEAKQPNSAIRKCVRVQLIKNGKKIAAFVPRDGCLNYVDENDEVLVAGFGRSGHAVGDIPGVRFKCVKVAGVSLLALYKEKKEKPRS	100	5e-102	gi|224000856|ref|XP_002290100.1|	RS23, ribosomal protein 23 40S small ribosomal subunit [Thalassiosira pseudonana CCMP1335]	81.82	1e-82	sp|Q86FP7|RS23_DERVA	40S ribosomal protein S23 OS=Dermacentor variabilis GN=RpS23 PE=2 SV=1	100	1e-100	tr|B8C1Z7|B8C1Z7_THAPS	RS23, ribosomal protein 23 40S small ribosomal subunit OS=Thalassiosira pseudonana GN=RS23 PE=3 SV=1	gi|118575640|ref|YP_875383.1|	167	1e-52	COG0048	Ribosomal protein S12	J	Translation, ribosomal structure and biogenesis	K02973|1|3e-79|233|ccp:CHC_T00010305001| small subunit ribosomal protein S23e	GO:0006412//translation	GO:0003735//structural constituent of ribosome	GO:0033009//nucleomorph;GO:0015935//small ribosomal subunit
41		EJK46643.1	hypothetical protein THAOC_34681 [Thalassiosira oceanica]	28736	0.105	1	2	-	0.32	0.093	0.004248	-0.5	EJK46643.1	MAKKSSKSSKAKAPAKAPSKADPLFPSKPRSFGVGGDVRPSGRDLSRFVRWPKYVRIQRQRAVLYQRLKVPPSINQFTKAIGKNEAASVFTLLNKYRPETPAQKKQRLKETAAGKAKAAGVPHQLKFGLKHVTTLVEEKKASLVLIACDVNPIELVLWLPALCRKMEVPFLIVKDKARLGTLVHQKTSAVVALTGVNKEDEKQLQIFRDLGIEKFNDNTDLMRKWGGGIMGLKTQAKLDKRAKALAVEEAKKQASLKR	100	7e-165	gi|397569278|gb|EJK46643.1|	hypothetical protein THAOC_34681 [Thalassiosira oceanica]	54.89	3e-82	sp|P0DJ14|RL7A_TETTH	60S ribosomal protein L7a OS=Tetrahymena thermophila GN=RPL7A PE=1 SV=1	100	2e-163	tr|K0R247|K0R247_THAOC	Uncharacterized protein OS=Thalassiosira oceanica GN=THAOC_34681 PE=4 SV=1	gi|13541280|ref|NP_110968.1|	63.2	5e-11	COG1358	Ribosomal protein L7Ae or related RNA K-turn-binding protein	J	Translation, ribosomal structure and biogenesis	K02936|1|9e-83|252|ccp:CHC_T00010252001| large subunit ribosomal protein L7Ae			GO:0030529//ribonucleoprotein complex
42		AIR75420.1	ribosomal protein L12 (chloroplast) [Cyclotella sp. L04_2]	13482.2	0.141	1	5	AIR75561.1	0.48	0.155	0.01748	-0.5	AIR75420.1	MSEKITQIVEELKTLTLLEASELVAAIEETFGVDASASVGGNIVMAAAPAAVEEVEEKTEFNVMLDEVPADKKIAVLKVVRTLTGLGLKEAKELVESTPKVIQEALGKEAAEDAKKQIEDAGGKVSLT	100	1e-71	gi|691189906|gb|AIR75420.1|	ribosomal protein L12 (chloroplast) [Cyclotella sp. L04_2]	91.41	3e-64	sp|A0T0Q7|RK12_THAPS	50S ribosomal protein L12, chloroplastic OS=Thalassiosira pseudonana GN=rpl12 PE=3 SV=1	100	3e-70	tr|A0A089VM10|A0A089VM10_9STRA	50S ribosomal protein L12, chloroplastic OS=Cyclotella sp. L04_2 GN=rpl12 PE=3 SV=1	gi|428307481|ref|YP_007144306.1|	161	1e-50	COG0222	Ribosomal protein L7/L12	J	Translation, ribosomal structure and biogenesis	K02863|1|1e-29|114|gsl:Gasu_40200| large subunit ribosomal protein L1!K02935|2|5e-27|102|sly:101253247| large subunit ribosomal protein L7/L12	GO:0006412//translation	GO:0003735//structural constituent of ribosome	GO:0005840//ribosome;GO:0009507//chloroplast
43		YP_009093163.1	ribosomal protein L12 (chloroplast) [Roundia cardiophora]	13460.1	0.133	1	13	AIR75836.1	0.6	0.016	3.651e-05	2.6	YP_009093163.1	MSEKINQIVEELKTLTLLEASELVTAIEETFGVDASASVGGSIVMGAAPAAAEEVEEKTEFNVMLDEVPADKKIAVLKVVRTLTGLGLKEAKELVESAPKMVQEALSKDAAEDAKKQIEDAGGKVSLT	100	1e-70	gi|700658158|ref|YP_009093163.1|	ribosomal protein L12 (chloroplast) [Roundia cardiophora]	92.19	4e-62	sp|A0T0Q7|RK12_THAPS	50S ribosomal protein L12, chloroplastic OS=Thalassiosira pseudonana GN=rpl12 PE=3 SV=1	100	3e-69	tr|A0A089VHS3|A0A089VHS3_9STRA	50S ribosomal protein L12, chloroplastic OS=Roundia cardiophora GN=rpl12 PE=3 SV=1	gi|428307481|ref|YP_007144306.1|	164	1e-51	COG0222	Ribosomal protein L7/L12	J	Translation, ribosomal structure and biogenesis	K02863|1|9e-27|106|gsl:Gasu_40200| large subunit ribosomal protein L1!K02935|2|5e-26|99.8|sly:101253247| large subunit ribosomal protein L7/L12	GO:0006412//translation	GO:0003735//structural constituent of ribosome	GO:0005840//ribosome;GO:0009507//chloroplast
44		ADB27494.1	30S ribosomal protein S18 (chloroplast) [Thalassiosira oceanica CCMP1005]	8142.7	0.139	1	1	YP_874526.1;YP_009093443.1;EED86178.1;AIR76116.1;YP_004072540.1;ABK20749.1;sp|A0T0R4.1|RR18_THAPS;XP_002297538.1	0.65	0.085	0.006788	-0.4	ADB27494.1	MLSQKHKLAPIGINQKIDYKDIDLLKLFITEQGKILPRRATGVTVQQQRQIAKAIKRARVLSLLPFVASNEL	100	2e-45	gi|315320484|ref|YP_004072540.1|	30S ribosomal protein S18 [Thalassiosira oceanica CCMP1005]	94.44	9e-44	sp|A0T0R4|RR18_THAPS	30S ribosomal protein S18, chloroplastic OS=Thalassiosira pseudonana GN=rps18 PE=3 SV=1	100	6e-44	tr|E7BWD6|E7BWD6_THAOC	30S ribosomal protein S18, chloroplastic OS=Thalassiosira oceanica GN=rps18 PE=3 SV=1	gi|22299604|ref|NP_682851.1|	89.7	5e-24	COG0238	Ribosomal protein S18	J	Translation, ribosomal structure and biogenesis	K02963|1|2e-18|75.1|ppp:PhpapaCp015| small subunit ribosomal protein S18	GO:0006412//translation	GO:0003735//structural constituent of ribosome;GO:0019843//rRNA binding	GO:0005840//ribosome;GO:0009507//chloroplast
45		AIR75420.1	ribosomal protein L12 (chloroplast) [Cyclotella sp. L04_2]	13482.2	0.141	1	5	AIR75561.1	0.48	0.155	0.01748	-0.2	AIR75420.1	MSEKITQIVEELKTLTLLEASELVAAIEETFGVDASASVGGNIVMAAAPAAVEEVEEKTEFNVMLDEVPADKKIAVLKVVRTLTGLGLKEAKELVESTPKVIQEALGKEAAEDAKKQIEDAGGKVSLT	100	1e-71	gi|691189906|gb|AIR75420.1|	ribosomal protein L12 (chloroplast) [Cyclotella sp. L04_2]	91.41	3e-64	sp|A0T0Q7|RK12_THAPS	50S ribosomal protein L12, chloroplastic OS=Thalassiosira pseudonana GN=rpl12 PE=3 SV=1	100	3e-70	tr|A0A089VM10|A0A089VM10_9STRA	50S ribosomal protein L12, chloroplastic OS=Cyclotella sp. L04_2 GN=rpl12 PE=3 SV=1	gi|428307481|ref|YP_007144306.1|	161	1e-50	COG0222	Ribosomal protein L7/L12	J	Translation, ribosomal structure and biogenesis	K02863|1|1e-29|114|gsl:Gasu_40200| large subunit ribosomal protein L1!K02935|2|5e-27|102|sly:101253247| large subunit ribosomal protein L7/L12	GO:0006412//translation	GO:0003735//structural constituent of ribosome	GO:0005840//ribosome;GO:0009507//chloroplast
46		AIR76108.1	ribosomal protein L1 (chloroplast) [Thalassiosira weissflogii]	25287.2	0.117	2	6	YP_009093435.1	0.49	0.043	0.0004865	-1.7	AIR76108.1	MRKLSRRQNENLKKTKNVVHSSLEEAINLLQETATAKFIESVELHANLNIDPKYADQQLRTTVTLPHGVGKSVRIAVLTNEANFNEATEAGADIVGSQDLIDDISQGNINFDLLIATPDMMPKLAKLGRVLGPKGLMPSPKSGTVSTTLTETLSDFKKGKFEYKADKTGIVHVSFGKANFSKSQLMENLSSLYKSIEQNRPSGVKGKYFKSLFICSSMGPSIQLDLNVFD	100	6e-170	gi|700082637|ref|YP_009093435.1|	ribosomal protein L1 (chloroplast) [Thalassiosira weissflogii]	91.74	6e-159	sp|A0T0Q6|RK1_THAPS	50S ribosomal protein L1, chloroplastic OS=Thalassiosira pseudonana GN=rpl1 PE=3 SV=1	100	1e-168	tr|A0A089VQC3|A0A089VQC3_THAWE	50S ribosomal protein L1, chloroplastic OS=Thalassiosira weissflogii GN=rpl1 PE=3 SV=1	gi|428768608|ref|YP_007160398.1|	293	9e-100	COG0081	Ribosomal protein L1	J	Translation, ribosomal structure and biogenesis	K02863|1|3e-90|273|nnu:104606334| large subunit ribosomal protein L1	GO:0006412//translation	GO:0003735//structural constituent of ribosome;GO:0019843//rRNA binding	GO:0015934//large ribosomal subunit;GO:0009507//chloroplast
47		YP_009093163.1	ribosomal protein L12 (chloroplast) [Roundia cardiophora]	13460.1	0.133	1	13	AIR75836.1	0.6	0.016	3.651e-05	-0.4	YP_009093163.1	MSEKINQIVEELKTLTLLEASELVTAIEETFGVDASASVGGSIVMGAAPAAAEEVEEKTEFNVMLDEVPADKKIAVLKVVRTLTGLGLKEAKELVESAPKMVQEALSKDAAEDAKKQIEDAGGKVSLT	100	1e-70	gi|700658158|ref|YP_009093163.1|	ribosomal protein L12 (chloroplast) [Roundia cardiophora]	92.19	4e-62	sp|A0T0Q7|RK12_THAPS	50S ribosomal protein L12, chloroplastic OS=Thalassiosira pseudonana GN=rpl12 PE=3 SV=1	100	3e-69	tr|A0A089VHS3|A0A089VHS3_9STRA	50S ribosomal protein L12, chloroplastic OS=Roundia cardiophora GN=rpl12 PE=3 SV=1	gi|428307481|ref|YP_007144306.1|	164	1e-51	COG0222	Ribosomal protein L7/L12	J	Translation, ribosomal structure and biogenesis	K02863|1|9e-27|106|gsl:Gasu_40200| large subunit ribosomal protein L1!K02935|2|5e-26|99.8|sly:101253247| large subunit ribosomal protein L7/L12	GO:0006412//translation	GO:0003735//structural constituent of ribosome	GO:0005840//ribosome;GO:0009507//chloroplast
1	Small subunit	AIR75421.1	ribosomal protein S2 (chloroplast) [Cyclotella sp. L04_2]	25765	0.195	4	14	AIR75562.1;sp|A0T0Q8.1|RR2_THAPS;EED86156.1;ABK20743.1;YP_874520.1;XP_002297516.1	0.59	0.134	0.01715	-0.5	AIR75421.1	MADINLAQLLEAGVHFGHKAYRWNPKMFPYIYTERNNIHILDLVQTAQLLKRANSYVKNAALEGKTFLFVGTKRQASALIAQEAKRCPSGYYVNHRWLGGMLTNWTTLKSRIERLKTLEQQEVEGIFKLLPKKEASLRLKELEKLRKHLNGVKDMTKLPDVAIIIDQKREITAIKECRKLGIPIISILDTNCDPDLVDVPIPGNDDAVRSIKLILNSLTNSIISVA	100	8e-152	gi|691189907|gb|AIR75421.1|	ribosomal protein S2 (chloroplast) [Cyclotella sp. L04_2]	93.27	1e-143	sp|A0T0Q8|RR2_THAPS	30S ribosomal protein S2, chloroplastic OS=Thalassiosira pseudonana GN=rps2 PE=3 SV=1	100	2e-150	tr|A0A089VGL7|A0A089VGL7_9STRA	30S ribosomal protein S2, chloroplastic OS=Cyclotella sp. L04_2 GN=rps2 PE=3 SV=1	gi|158336564|ref|YP_001517738.1|	323	1e-110	COG0052	Ribosomal protein S2	J	Translation, ribosomal structure and biogenesis	K02967|1|2e-78|238|ppp:PhpapaCp057| small subunit ribosomal protein S2	GO:0006412//translation	GO:0003735//structural constituent of ribosome	GO:0015935//small ribosomal subunit;GO:0009507//chloroplast;GO:0005739//mitochondrion
2		EJK48596.1	hypothetical protein THAOC_32592 [Thalassiosira oceanica]	31439.8	0.182	2	5	-	0.72	0.071	0.006202	-2.2	EJK48596.1	MASAFASLPAVLQPKEEDIQMMLSAGVHTGTRNSDSAMEEYIWRRRKDGLHVLNIGKTWEKIMLAARVIVAIENPEDVVAISARPWGMRAVLKFAHYTGSQSIAGRFTPGTFTNQITKQFREPRLLIVTDPRTDSQAVRESSYVNIPVIAFCDSDSPLQHVDIAIPANNKGKHSIGLMYWMLAREVLRLRGSVSRSVDWDVPVDLFFHRDIEELKKTEEEQAAAKLQAEQQPAPAYEQEVPAGDGAFEQPVPEAAAAATSEPAAEGGAQQWQAAPADAQASAAAEW	100	3e-156	gi|397573199|gb|EJK48596.1|	hypothetical protein THAOC_32592 [Thalassiosira oceanica]	66.02	8e-104	sp|A8N7C6|RSSA_COPC7	40S ribosomal protein S0 OS=Coprinopsis cinerea (strain Okayama-7 / 130 / ATCC MYA-4618 / FGSC 9003) GN=RPS0 PE=3 SV=1	100	8e-155	tr|K0RI69|K0RI69_THAOC	40S ribosomal protein SA OS=Thalassiosira oceanica GN=THAOC_32592 PE=3 SV=1	gi|312137116|ref|YP_004004453.1|	197	2e-61	COG0052	Ribosomal protein S2	J	Translation, ribosomal structure and biogenesis	K02998|1|8e-103|302|smo:SELMODRAFT_36118| small subunit ribosomal protein SAe	GO:0006412//translation;GO:0009651//response to salt stress;GO:0042256//mature ribosome assembly	GO:0003735//structural constituent of ribosome	GO:0015935//small ribosomal subunit;GO:0009507//chloroplast;GO:0022626//cytosolic ribosome;GO:0005634//nucleus;GO:0005886//plasma membrane
3		EED93535.1	RS13, ribosomal protein 13 40S small ribosomal subunit [Thalassiosira pseudonana CCMP1335]	17139.3	0.132	3	8	XP_002289998.1	0.69	0.158	0.04155	-1.7	EED93535.1	MGRMHAPGKGISKSAKPYKRTPPSWCKVSATDVEEHVCKLAKKGLTPSQIGVILRDSHGIAQVHTVTGQKIVRILKANGLAPEIPEDLYMLIKKAVAVRKHLERNRQDKDSKFRLILIESRIHRLARYYRTTRKLPANWKYESATASTMVA	100	3e-109	gi|224000651|ref|XP_002289998.1|	RS13, ribosomal protein 13 40S small ribosomal subunit [Thalassiosira pseudonana CCMP1335]	81.46	1e-89	sp|P62302|RS13_SOYBN	40S ribosomal protein S13 OS=Glycine max GN=RPS13 PE=2 SV=1	100	7e-108	tr|B8C0K5|B8C0K5_THAPS	RS13, ribosomal protein 13 40S small ribosomal subunit OS=Thalassiosira pseudonana GN=RS13 PE=3 SV=1	gi|57641186|ref|YP_183664.1|	155	7e-48	COG0184	Ribosomal protein S15P/S13E	J	Translation, ribosomal structure and biogenesis	K02953|1|5e-90|261|jcu:105645959| small subunit ribosomal protein S13e	GO:0006412//translation	GO:0003735//structural constituent of ribosome	GO:0022627//cytosolic small ribosomal subunit
4		ADB27494.1	30S ribosomal protein S18 (chloroplast) [Thalassiosira oceanica CCMP1005]	8142.7	0.139	1	1	YP_874526.1;YP_009093443.1;EED86178.1;AIR76116.1;YP_004072540.1;ABK20749.1;sp|A0T0R4.1|RR18_THAPS;XP_002297538.1	0.65	0.085	0.006788	-0.7	ADB27494.1	MLSQKHKLAPIGINQKIDYKDIDLLKLFITEQGKILPRRATGVTVQQQRQIAKAIKRARVLSLLPFVASNEL	100	2e-45	gi|315320484|ref|YP_004072540.1|	30S ribosomal protein S18 [Thalassiosira oceanica CCMP1005]	94.44	9e-44	sp|A0T0R4|RR18_THAPS	30S ribosomal protein S18, chloroplastic OS=Thalassiosira pseudonana GN=rps18 PE=3 SV=1	100	6e-44	tr|E7BWD6|E7BWD6_THAOC	30S ribosomal protein S18, chloroplastic OS=Thalassiosira oceanica GN=rps18 PE=3 SV=1	gi|22299604|ref|NP_682851.1|	89.7	5e-24	COG0238	Ribosomal protein S18	J	Translation, ribosomal structure and biogenesis	K02963|1|2e-18|75.1|ppp:PhpapaCp015| small subunit ribosomal protein S18	GO:0006412//translation	GO:0003735//structural constituent of ribosome;GO:0019843//rRNA binding	GO:0005840//ribosome;GO:0009507//chloroplast
5		sp|A0T0N1.1|RK19_THAPS	RecName: Full=50S ribosomal protein L19, chloroplastic	13784.8	0.242	1	1	EED86161.1;ABK20716.1;YP_874493.1;XP_002297521.1	0.3	0.207	0.03305	-1.1	sp|A0T0N1.1|RK19_THAPS	MLNLDNQKAIDNLHQSFIKSDLPKIQIGDTLKLGIKIIEGNKERVQFYEGTVIAKKNSSINTTITVRKVLQGIGIERIFLIHSPKVASIEVIRHAKVRRSKLYYLRNLRGKASRLKQRFE	100	1e-81	gi|118411099|ref|YP_874493.1|	50S ribosomal protein L19 [Thalassiosira pseudonana]	100	2e-82	sp|A0T0N1|RK19_THAPS	50S ribosomal protein L19, chloroplastic OS=Thalassiosira pseudonana GN=rpl19 PE=3 SV=1	100	2e-80	tr|B8LES2|B8LES2_THAPS	RK19, ribosomal protein 19 50S large ribosomal subunit, chloroplast, translation, protein biosynthesis OS=Thalassiosira pseudonana GN=RK19 PE=3 SV=1	gi|16330014|ref|NP_440742.1|	162	3e-51	COG0335	Ribosomal protein L19	J	Translation, ribosomal structure and biogenesis	K02884|1|1e-21|86.3|mdm:103432807| large subunit ribosomal protein L19	GO:0006412//translation	GO:0003735//structural constituent of ribosome	GO:0005840//ribosome;GO:0009507//chloroplast
6		XP_002292331.1	RS1, ribosomal protein 1, partial [Thalassiosira pseudonana CCMP1335]	31903.2	0.199	6	15	EED90306.1	0.83	0.061	0.01432	2.1	XP_002292331.1	VGFSYASFADAVAATDYAFNRNDIVKGTVVQYDKGGCIVDIGAKASAYLPLQEATLFQEQGQSIEGIIDIDEERQFEIISEEDENGQLLVSIRRIQYREAWDKVIAKQDSDEVFEAECVSVNRGGAIFLVEGLRAFLPGSHLTGRLPDDDLVGQTLPLKFLEVNQEDNKLVVSNRRAVVEEQMAELSRGDVIDGIVKALKPYGAFVEVGGMSGLLHISQISMDRITDLEQVLQPGQKIKCMIIDHDKVNGRIALSTKTLEPEPGDMIKDPARVYEMADETARVYLEK	100	0	gi|224006742|ref|XP_002292331.1|	RS1, ribosomal protein 1 [Thalassiosira pseudonana CCMP1335]	49.13	7e-92	sp|P46228|RS1_SYNP6	30S ribosomal protein S1 OS=Synechococcus sp. (strain ATCC 27144 / PCC 6301 / SAUG 1402/1) GN=rpsA PE=1 SV=4	100	0	tr|B8C8K9|B8C8K9_THAPS	RS1, ribosomal protein 1 (Fragment) OS=Thalassiosira pseudonana GN=RS1 PE=4 SV=1	gi|428224572|ref|YP_007108669.1|	285	3e-94	COG0539	Ribosomal protein S1	J	Translation, ribosomal structure and biogenesis	K02945|1|2e-84|261|mis:MICPUN_95520| small subunit ribosomal protein S1	GO:0006412//translation	GO:0003735//structural constituent of ribosome;GO:0003723//RNA binding	GO:0005840//ribosome;GO:0009536//plastid
7		EJK76287.1	hypothetical protein THAOC_01961 [Thalassiosira oceanica]	22771.4	0.092	1	5	-	0.39	0.156	0.01536	-0.7	EJK76287.1	MVKHNNVIPNIHCHKKYLESSRGPLKVKLSLNQAGKKKSRRLARAARAAAIAPRPLKLLRPAVHCQTQRYSAKVRLGKGFTLEELKAAGLTAKYARTIGIAVDHRRTNKSAESLAANVARLNEYKSKVIVFPKKRMSATKSGDSSAEECKAASQYSGTVLPLVKPAKEIVLEDVPEQEVSAFTQMRLAAKETRVAGHRASVANRKE	100	6e-123	gi|397644187|gb|EJK76287.1|	hypothetical protein THAOC_01961 [Thalassiosira oceanica]	47.06	8e-40	sp|P41128|RL131_BRANA	60S ribosomal protein L13-1 OS=Brassica napus PE=2 SV=1	100	2e-121	tr|K0TQM1|K0TQM1_THAOC	60S ribosomal protein L13 OS=Thalassiosira oceanica GN=THAOC_01961 PE=3 SV=1	-	-	-	-	-	-	-	K02873|1|6e-41|141|ppp:PHYPADRAFT_227920| large subunit ribosomal protein L13e			GO:0030529//ribonucleoprotein complex
8		XP_002288348.1	RL24, ribosomal protein 24 60S large ribosomal subunit, partial [Thalassiosira pseudonana CCMP1335]	13747.8	0.16	2	3	EED93784.1;EJK61686.1	0.55	0.193	0.03659	-2.1	XP_002288348.1	ELCAMSEYRIWPGTGKLFIRRDGKPIFLGSSKAQSLTLQRKKPAKLVWTQAWRRLHKKGLSETNLKKRRTRTNKVQRAVVGLSLEDIKKKASQKAEFRSAQRDAALKEVKDRKKANKAK	100	6e-81	gi|223997350|ref|XP_002288348.1|	RL24, ribosomal protein 24 60S large ribosomal subunit [Thalassiosira pseudonana CCMP1335]	48.31	2e-28	sp|Q92354|RL24A_SCHPO	60S ribosomal protein L24-A OS=Schizosaccharomyces pombe (strain 972 / ATCC 24843) GN=rpl2401 PE=3 SV=1	100	1e-79	tr|B8BXX5|B8BXX5_THAPS	RL24, ribosomal protein 24 60S large ribosomal subunit (Fragment) OS=Thalassiosira pseudonana GN=RL24 PE=4 SV=1	-	-	-	-	-	-	-	K02896|1|6e-27|100|cvr:CHLNCDRAFT_29622| large subunit ribosomal protein L24e			GO:0005840//ribosome
9		XP_002287868.1	predicted protein [Thalassiosira pseudonana CCMP1335]	13381.3	0.069	1	1	EED95311.1	0.28	0.179	0.02207	-1.6	XP_002287868.1	MARERKAKPDLVSRDYTIHLAKHTHKTTFKAKTPRGIKKIKEFAQKAMGTKDVRIDTDVNKFVWAQGVRNPPKRIRVRLSRKRNEDEDAEEKLYTLVQLVKVSTFKGLSTENVDSA	100	4e-69	gi|223996389|ref|XP_002287868.1|	predicted protein [Thalassiosira pseudonana CCMP1335]	60.38	2e-38	sp|Q9XGL4|RL31_CYAPA	60S ribosomal protein L31 OS=Cyanophora paradoxa GN=RPL31 PE=3 SV=1	100	9e-68	tr|B8BUM0|B8BUM0_THAPS	Uncharacterized protein OS=Thalassiosira pseudonana GN=THAPSDRAFT_27101 PE=4 SV=1	gi|407462934|ref|YP_006774251.1|	60.5	2e-11	COG2097	Ribosomal protein L31E	J	Translation, ribosomal structure and biogenesis	K02910|1|2e-37|125|ccp:CHC_T00009180001| large subunit ribosomal protein L31e	GO:0006412//translation	GO:0003735//structural constituent of ribosome	GO:0005840//ribosome
10		EJK66241.1	hypothetical protein THAOC_12850 [Thalassiosira oceanica]	12619.7	0.09	1	6	EED89937.1;XP_002292741.1	0.63	0.17	0.03744	-0.7	EJK66241.1	MTKQNSQPVRLYVNGAILGYKRGLRNQYNHTSLIKIKGVDSKEETQFYLGKRIAYITKAKSSKNGSKFRVNWGRVCRAHGSNGVVKCKFARDLPPQSIGGRVRVMLYPSNV	100	8e-78	gi|397621342|gb|EJK66241.1|	hypothetical protein THAOC_12850 [Thalassiosira oceanica]	56.76	2e-41	sp|Q9FZH0|R35A2_ARATH	60S ribosomal protein L35a-2 OS=Arabidopsis thaliana GN=RPL35AB PE=3 SV=1	100	2e-76	tr|K0SZ17|K0SZ17_THAOC	Uncharacterized protein OS=Thalassiosira oceanica GN=THAOC_12850 PE=4 SV=1	gi|18978244|ref|NP_579601.1|	55.8	7e-10	COG2451	Ribosomal protein L35AE/L33A	J	Translation, ribosomal structure and biogenesis	K02917|1|8e-48|151|csl:COCSUDRAFT_68044| large subunit ribosomal protein L35Ae	GO:0006412//translation	GO:0003735//structural constituent of ribosome	GO:0005840//ribosome
11		EJK60029.1	hypothetical protein THAOC_19689 [Thalassiosira oceanica]	126479	0.048	2	2	-	0.35	0.132	0.01046	-1.2	EJK60029.1	MCLSAAVMGSRGSLSYLRYQTTERDFYVSAPLLTHFNIHSGKNKRLTKSKKGSKKKAVDPFLKKDWYKLIAPSIFSQKECGKTIITRTQGQKIASEGLKGRVIELSLGDLNQNEASSYRKIKLCVEDVQGFNCLLNFHGMDMTRDKLCSLIKKKQSIIEANVDARTTDGYIVRMFCIAFTKKQDDQLKETCYAKSAKERSIRAKMVSTMATLAGKGDLKTLVKALVAGTTGDEIVREASSIFPIKDCYIRKVKVIKKPKFDVTALMEWHNDDGQDVGQNVAPAVAEETVAGSGGRLSRVQTAHEDENGVKGQAEDLTYSTMFGDPSSPLTWEILSRLAGASTSSSGEARPFYVQRAGPGGEEPRVDEDEQFFFADPLGSASAASLSVCSRDTASERLLR…	100	0	gi|397608572|gb|EJK60029.1|	hypothetical protein THAOC_19689 [Thalassiosira oceanica]	57.26	9e-81	sp|Q285L8|RS3A_TOBAC	40S ribosomal protein S3a OS=Nicotiana tabacum GN=cyc07 PE=2 SV=1	100	0	tr|K0S574|K0S574_THAOC	40S ribosomal protein S3a OS=Thalassiosira oceanica GN=THAOC_19689 PE=3 SV=1	gi|330509087|ref|YP_004385515.1|	102	1e-22	COG1890	Ribosomal protein S3AE	J	Translation, ribosomal structure and biogenesis	K02984|1|2e-81|270|sly:101260518| small subunit ribosomal protein S3Ae	GO:0006412//translation	GO:0003735//structural constituent of ribosome	GO:0005840//ribosome
12		XP_002296774.1	predicted protein, partial [Thalassiosira pseudonana CCMP1335]	14117.6	0.244	3	10	EED86975.1	0.5	0.046	0.0006274	-1.2	XP_002296774.1	VRTKTVKKSARTIVEKYYPRLTLDFHTNKRIIDEIAITPSKRMRNKIAGFTTHLMKRIAKGPVRNISLKLQEEERERRLDFVPEVSALEQETIAIDRETRDLLESMGYGSLNGVVVSNSADRS	100	3e-79	gi|224014222|ref|XP_002296774.1|	predicted protein [Thalassiosira pseudonana CCMP1335]	65.55	3e-49	sp|Q9P7J6|RS17B_SCHPO	40S ribosomal protein S17-B OS=Schizosaccharomyces pombe (strain 972 / ATCC 24843) GN=rps1702 PE=1 SV=1	100	7e-78	tr|B8LCF3|B8LCF3_THAPS	Predicted protein (Fragment) OS=Thalassiosira pseudonana GN=THAPSDRAFT_37809 PE=3 SV=1	gi|333911189|ref|YP_004484922.1|	61.6	3e-12	COG1383	Ribosomal protein S17E	J	Translation, ribosomal structure and biogenesis	K02962|1|7e-54|168|olu:OSTLU_31424| small subunit ribosomal protein S17e	GO:0006412//translation	GO:0003735//structural constituent of ribosome	GO:0005840//ribosome
13		EJK56174.1	hypothetical protein THAOC_23991 [Thalassiosira oceanica]	17127.8	0.253	1	9	-	0.33	0.149	0.01339	-1.1	EJK56174.1	MAEETRGICVRDVPAKAFIAAYAEHLKNSDKFELPVWADLVKTSVAKELAPYGDDWYYIRAASIARRVYLRPGLGVGQLRKWYGGTDKKGVKTEHFRKANAGIIRSVLIQLEEMKVTEKCEKGGRRMTRVGQQDLDRIAGSVFYDEEEED	100	6e-108	gi|397594205|gb|EJK56174.1|	hypothetical protein THAOC_23991 [Thalassiosira oceanica]	56.62	1e-50	sp|Q9SGA6|RS191_ARATH	40S ribosomal protein S19-1 OS=Arabidopsis thaliana GN=RPS19A PE=2 SV=1	100	1e-106	tr|K0RUT6|K0RUT6_THAOC	Uncharacterized protein OS=Thalassiosira oceanica GN=THAOC_23991 PE=4 SV=1	gi|330508430|ref|YP_004384858.1|	114	1e-31	COG2238	Ribosomal protein S19E (S16A)	J	Translation, ribosomal structure and biogenesis	K02966|1|1e-50|161|crb:CARUB_v10002213mg| small subunit ribosomal protein S19e	GO:0001510//RNA methylation;GO:0006412//translation	GO:0003735//structural constituent of ribosome	GO:0005618//cell wall;GO:0005730//nucleolus;GO:0009506//plasmodesma;GO:0022627//cytosolic small ribosomal subunit;GO:0016020//membrane
14		EED91184.1	RS24, ribosomal protein 24 40S small ribosomal subunit [Thalassiosira pseudonana CCMP1335]	15339.3	0.168	2	11	XP_002291077.1	0.62	0.187	0.04492	-1.3	EED91184.1	MSDQSVVVKTRKFMKNPLLARRQMIVDIIHPGRANVAKSELQEVVGGMHKTDSKLVVLFGFRTKFGGGKSTGFCVIYDNEDALRKFEPKHRLVRLGLEDKKDRSRKAMKEAKNKGKKTRGTGASVAKHKAKRAANSD	100	3e-86	gi|224002811|ref|XP_002291077.1|	RS24, ribosomal protein 24 40S small ribosomal subunit [Thalassiosira pseudonana CCMP1335]	59.18	3e-40	sp|P14249|RS24_MUCCL	40S ribosomal protein S24 OS=Mucor circinelloides f. lusitanicus GN=RPS24 PE=3 SV=1	100	7e-85	tr|B8C5V1|B8C5V1_THAPS	RS24, ribosomal protein 24 40S small ribosomal subunit OS=Thalassiosira pseudonana GN=RS24 PE=3 SV=1	gi|289596242|ref|YP_003482938.1|	56.6	8e-10	COG2004	Ribosomal protein S24E	J	Translation, ribosomal structure and biogenesis	K02974|1|2e-43|142|olu:OSTLU_42986| small subunit ribosomal protein S24e	GO:0006412//translation	GO:0003735//structural constituent of ribosome;GO:0000166//nucleotide binding	GO:0005840//ribosome
15		XP_002291480.1	RS26, ribosomal protein 26 40S small ribosomal subunit, partial [Thalassiosira pseudonana CCMP1335]	11060	0.223	2	2	EED91587.1;EJK48154.1	0.8	0.099	0.0333	0.2	XP_002291480.1	NHGRNKHGRGHVKRVRCASTGKAIPKDKAIKRFIVRNIVDASSLRDIKEASAYQEYQLPKLYLKMYYCVEAAVHQRIVRGRSREARRIRTPPER	100	2e-63	gi|224003617|ref|XP_002291480.1|	RS26, ribosomal protein 26 40S small ribosomal subunit [Thalassiosira pseudonana CCMP1335]	63.83	5e-42	sp|Q9UTG4|RS26B_SCHPO	40S ribosomal protein S26-B OS=Schizosaccharomyces pombe (strain 972 / ATCC 24843) GN=rps2602 PE=3 SV=1	100	4e-62	tr|B8C5Y3|B8C5Y3_THAPS	40S ribosomal protein S26 (Fragment) OS=Thalassiosira pseudonana GN=RS26 PE=3 SV=1	gi|170290809|ref|YP_001737625.1|	55.8	8e-10	COG4830	Ribosomal protein S26	J	Translation, ribosomal structure and biogenesis	K02976|1|2e-41|135|sly:101247310| small subunit ribosomal protein S26e	GO:0006412//translation	GO:0003735//structural constituent of ribosome	GO:0005840//ribosome
16		EED89177.1	RL6, ribosomal protein 6, partial [Thalassiosira pseudonana CCMP1335]	19595.4	0.079	1	2	XP_002293441.1	0.64	0.129	0.0197	-0.4	EED89177.1	PSKGKSARYYPADDIPRPKHSRAKKHNAPKVRASLTPGTVCILLSGRFRGKRVVCLKALESGLLLVTGPYKINGVPLRRVNQAYVIATSTKVDVSGADVSKIDDAYFARVKSDSAEGEEEFFANDAAKPAVVSDQRKADQKKVDAAILKAVESTPLMKNYLGSNFSLKKHDRPHEMIF	100	1e-128	gi|224008965|ref|XP_002293441.1|	RL6, ribosomal protein 6 [Thalassiosira pseudonana CCMP1335]	56	2e-61	sp|P34091|RL6_MESCR	60S ribosomal protein L6 OS=Mesembryanthemum crystallinum GN=RPL6 PE=2 SV=1	100	3e-127	tr|B8CBR7|B8CBR7_THAPS	60S ribosomal protein L6 (Fragment) OS=Thalassiosira pseudonana GN=RL6 PE=3 SV=1	gi|156938048|ref|YP_001435844.1|	52	1e-07	COG2163	Ribosomal protein L14E/L6E/L27E	J	Translation, ribosomal structure and biogenesis	K02934|1|1e-67|208|sind:105175445| large subunit ribosomal protein L6e	GO:0006412//translation	GO:0003735//structural constituent of ribosome	GO:0022626//cytosolic ribosome;GO:0043231//intracellular membrane-bounded organelle;GO:0016020//membrane;GO:0044446//intracellular organelle part
17		XP_002289814.1	RL18a, ribosomal protein 18a 60S large ribosomal subunit [Thalassiosira pseudonana CCMP1335]	21099.9	0.077	1	5	EED93351.1	0.46	0.123	0.01192	0.7	XP_002289814.1	MTVAGAMRQYQVVGRKAGTDENPNPEAYRMIIFAPNPTVAKSKFWYFMRQFRKMKKTTGEILDCVEIIEKNSRTVKNYGIWLRYDSRSGTHNMYREYRDLKLTGAISQLYDEMAGRHRTRPRSIQIIRTATLGAGELKRPNGAQFAQAKVKFPLPHRVDSAKRGQKALSDRTFSTVRPTTYFG	100	1e-136	gi|224000283|ref|XP_002289814.1|	RL18a, ribosomal protein 18a 60S large ribosomal subunit [Thalassiosira pseudonana CCMP1335]	53.85	4e-67	sp|Q7ZWJ4|RL18A_DANRE	60S ribosomal protein L18a OS=Danio rerio GN=rpl18a PE=2 SV=1	100	3e-135	tr|B8BZG7|B8BZG7_THAPS	60S ribosomal protein L18a OS=Thalassiosira pseudonana GN=RL18a PE=3 SV=1	-	-	-	-	-	-	-	K02882|1|4e-59|185|sind:105167545| large subunit ribosomal protein L18Ae	GO:0006468//protein phosphorylation;GO:0006412//translation	GO:0003735//structural constituent of ribosome;GO:0004672//protein kinase activity;GO:0005524//ATP binding	GO:0005840//ribosome
18		EJK74268.1	hypothetical protein THAOC_04063 [Thalassiosira oceanica]	14065.5	0.073	1	5	-	0.35	0.139	0.01172	-1.4	EJK74268.1	MAKGKAAKKSTKKFVIDCAAPVDDKVLDIASFEKYLNERVKIEGKQGNLAPNGVQITRDRTKITVATPDAVKFSKRQLKYLSKRYLKKQQLRDYLRVIANSKNSYQLKYYQITDAGDEDADEE	100	1e-75	gi|397640699|gb|EJK74268.1|	hypothetical protein THAOC_04063 [Thalassiosira oceanica]	45.45	7e-32	sp|P52819|RL22_CAEEL	60S ribosomal protein L22 OS=Caenorhabditis elegans GN=rpl-22 PE=1 SV=3	100	3e-74	tr|K0T682|K0T682_THAOC	Uncharacterized protein OS=Thalassiosira oceanica GN=THAOC_04063 PE=4 SV=1	-	-	-	-	-	-	-	K02891|1|5e-35|120|ppp:PHYPADRAFT_122343| large subunit ribosomal protein L22e	GO:0006412//translation	GO:0003735//structural constituent of ribosome	GO:0005840//ribosome
19		XP_002294138.1	predicted protein, partial [Thalassiosira pseudonana CCMP1335]	12983.6	0.087	1	5	EED88493.1;EJK74848.1	0.48	0.119	0.00923	-1.1	XP_002294138.1	LKKALIHDGLRKGLHECAKALDRRSARLCCLAKDCENEEYKKLIRALCAEGEVSVIMVDSGKDLGAWCGLAKLDAEGEVKKAVRTSCAVITDFGEETRALTVLLDYLQKQADGEE	100	2e-76	gi|224010361|ref|XP_002294138.1|	predicted protein [Thalassiosira pseudonana CCMP1335]	55.45	3e-37	sp|Q9SMI3|RS12_CYAPA	40S ribosomal protein S12 OS=Cyanophora paradoxa GN=RPS12 PE=2 SV=1	100	4e-75	tr|B8CDP0|B8CDP0_THAPS	40S ribosomal protein S12 (Fragment) OS=Thalassiosira pseudonana GN=THAPSDRAFT_37628 PE=3 SV=1	gi|332796280|ref|YP_004457780.1|	57	7e-10	COG1358	Ribosomal protein L7Ae or related RNA K-turn-binding protein	J	Translation, ribosomal structure and biogenesis	K02951|1|2e-38|129|apro:F751_2593| small subunit ribosomal protein S12e	GO:0042221//response to chemical;GO:0006412//translation	GO:0003735//structural constituent of ribosome;GO:0003723//RNA binding	GO:0022626//cytosolic ribosome;GO:0015935//small ribosomal subunit;GO:0009536//plastid
Table S3	Downregulation of ribosomal proteins in lower temperature cells
S. No	Subunit	Protein_ID	Description	Mass	Protein_Coverage	Uniq_Pep_Num	Uniq_Spec_Num	Sameset	Ratio_Control-VS-Low temperature	Quant_Num_Control-VS-Low temperature	Qvalue_Control-VS-Low temperature	Fold ange	Protein_ID	Protein_Seqence	NCBInr Identity	NCBInr E-value	NCBInr Accession	NCBInr Description	Swissprot Identity	Swissprot E-value	Swissprot Accession	Swissprot Description	Tremble Identity	Tremble E-value	Tremble Accession	Tremble Description	Protein_or_Domain	COG Score	COG E-value	COG ID	COG Function-Description	COG Code	COG Function-Categories	KEGG(ko_id|rank|evalue|score|identity|ko_definition)	GO Biological_Process	GO Molecular_Function	GO Cellular_Component
1	Large subunit	sp|A0T101.1|RR10_THAPS	RecName: Full=30S ribosomal protein S10, chloroplastic	12610.6	0.234	2	9	YP_874613.1;ABK20836.1;AIR75655.1;AIR75514.1	0.71	0.077	0.007563	-1.2	sp|A0T101.1|RR10_THAPS	MEIKPNEKIRVRLESFNHELLNTSCQKIMEITQNNNVDNVGVVSLPTDKRIYCVLRSPHVNKDSREHFEIRTHKRILEISYDSSVNIFDLLVKSDLPPGVLYRICLS	100	2e-73	gi|118411219|ref|YP_874613.1|	30S ribosomal protein S10 [Thalassiosira pseudonana]	100	4e-74	sp|A0T101|RR10_THAPS	30S ribosomal protein S10, chloroplastic OS=Thalassiosira pseudonana GN=rps10 PE=3 SV=1	88.79	6e-64	tr|A0A089VNJ0|A0A089VNJ0_9STRA	30S ribosomal protein S10, chloroplastic OS=Roundia cardiophora GN=rps10 PE=3 SV=1	gi|158334956|ref|YP_001516128.1|	120	3e-35	COG0051	Ribosomal protein S10	J	Translation, ribosomal structure and biogenesis	K02946|1|4e-31|108|ppp:PHYPADRAFT_114084| small subunit ribosomal protein S10	GO:0006412//translation	GO:0003735//structural constituent of ribosome;GO:0000049//tRNA binding	GO:0005840//ribosome;GO:0009507//chloroplast;GO:0005739//mitochondrion
2		EED93172.1	RS20, ribosomal protein 20 40S small ribosomal subunit, partial [Thalassiosira pseudonana CCMP1335]	13743.4	0.161	2	7	XP_002289635.1	0.72	0.112	0.02269	-1.2	EED93172.1	MSSYVPPGKKEAGLEADAGAQVHRIRITLTSRNVKNLEKVCADLKKGALDKKLNVSGPVRMPTKKLKITTRKAPSGEGTNTWDRFEMRIHKRLIDLHAPSDVVKQITSISIEPGVEVDVTINDR	100	2e-76	gi|223999925|ref|XP_002289635.1|	RS20, ribosomal protein 20 40S small ribosomal subunit [Thalassiosira pseudonana CCMP1335]	71.9	1e-49	sp|Q9STY6|RS202_ARATH	40S ribosomal protein S20-2 OS=Arabidopsis thaliana GN=RPS20B PE=2 SV=1	100	5e-75	tr|B8C138|B8C138_THAPS	RS20, ribosomal protein 20 40S small ribosomal subunit (Fragment) OS=Thalassiosira pseudonana GN=RS20 PE=3 SV=1	gi|530780468|ref|YP_008432275.1|	93.2	3e-24	COG0051	Ribosomal protein S10	J	Translation, ribosomal structure and biogenesis	K02969|1|2e-55|172|cre:CHLREDRAFT_195592| small subunit ribosomal protein S20e	GO:0006412//translation	GO:0003735//structural constituent of ribosome;GO:0003723//RNA binding	GO:0005730//nucleolus;GO:0005618//cell wall;GO:0022627//cytosolic small ribosomal subunit;GO:0016020//membrane
3		sp|A0T0X2.1|RK3_THAPS	RecName: Full=50S ribosomal protein L3, chloroplastic	22036.9	0.304	1	1	YP_874584.1;ABK20807.1	0.39	0.119	0.007242	-0.3	sp|A0T0X2.1|RK3_THAPS	MSLGLLGNKIGMTQIFDESGNIIPVTILKVGPCVITQVKTTLNDGYNAIQVGYGNVSTKALTQPQLGHLQKSNIQPLKYLKEFHVSDPTEFNVGQILNVESFVAGQLINVTGKSIGKGFSGLQKRYNFARGPMTHGSKNHRAPGSIGMGTSPGRVLPGKKMAGQLGNKTANIKKLKIVQVNNDENILVVKGAVPGKPGNLLSIIPSK	100	7e-147	gi|118411190|ref|YP_874584.1|	50S ribosomal protein L3 [Thalassiosira pseudonana]	100	1e-147	sp|A0T0X2|RK3_THAPS	50S ribosomal protein L3, chloroplastic OS=Thalassiosira pseudonana GN=rpl3 PE=3 SV=1	94.2	6e-138	tr|A0A089X984|A0A089X984_THAWE	50S ribosomal protein L3, chloroplastic OS=Thalassiosira weissflogii GN=rpl3 PE=3 SV=1	gi|428224235|ref|YP_007108332.1|	276	2e-93	COG0087	Ribosomal protein L3	J	Translation, ribosomal structure and biogenesis	K02906|1|2e-71|221|sind:105168351| large subunit ribosomal protein L3	GO:0006412//translation	GO:0003735//structural constituent of ribosome;GO:0019843//rRNA binding	GO:0005840//ribosome;GO:0009507//chloroplast
4		YP_009093501.1	ribosomal protein L3 (chloroplast) [Thalassiosira weissflogii]	22069.9	0.266	1	1	AIR76174.1	0.42	0.059	0.001123	-0.4	YP_009093501.1	MSLGLLGNKIGMTQIFDESGNIIPVTILKVGPCVITQVKTTLNDGYNAIQVGYGNVSPKSLTQPQLGHLQKSNIQPLKYLKEFRVSDPNNFNVGQVLNVESFVAGQLINVTGKSIGKGFSGLQKRHNFARGPMTHGSKNHRAPGSIGMGTSPGRVLPGKKMAGQLGNKTTNIRKLKIVQVNNDENILVVKGAIPGKPGNLVSIVPSK	100	4e-146	gi|700082703|ref|YP_009093501.1|	ribosomal protein L3 (chloroplast) [Thalassiosira weissflogii]	94.2	4e-140	sp|A0T0X2|RK3_THAPS	50S ribosomal protein L3, chloroplastic OS=Thalassiosira pseudonana GN=rpl3 PE=3 SV=1	100	1e-144	tr|A0A089X984|A0A089X984_THAWE	50S ribosomal protein L3, chloroplastic OS=Thalassiosira weissflogii GN=rpl3 PE=3 SV=1	gi|428314333|ref|YP_007125310.1|	278	2e-94	COG0087	Ribosomal protein L3	J	Translation, ribosomal structure and biogenesis	K02906|1|3e-74|228|sind:105168351| large subunit ribosomal protein L3	GO:0006412//translation	GO:0003735//structural constituent of ribosome;GO:0019843//rRNA binding	GO:0005840//ribosome;GO:0009507//chloroplast
5		YP_009093505.1	ribosomal protein S19 (chloroplast) [Thalassiosira weissflogii]	10420.7	0.174	2	2	AIR75905.1;AIR76178.1;YP_009093232.1	0.59	0.142	0.01935	-0.4	YP_009093505.1	MSRSLKKGPFVAYHLLKKINKMNAEGKKDIITTWSRSSTILPNMVGFTIAVYNGKQHVPIFISDQLVGHKLGEFVSTRTFKSHIKADKKTKR	100	1e-62	gi|700082707|ref|YP_009093505.1|	ribosomal protein S19 (chloroplast) [Thalassiosira weissflogii]	95.65	3e-62	sp|A0T0X6|RR19_THAPS	30S ribosomal protein S19, chloroplastic OS=Thalassiosira pseudonana GN=rps19 PE=3 SV=1	100	3e-61	tr|A0A089VQH3|A0A089VQH3_THAWE	30S ribosomal protein S19, chloroplastic OS=Thalassiosira weissflogii GN=rps19 PE=3 SV=1	gi|434388537|ref|YP_007099148.1|	147	3e-46	COG0185	Ribosomal protein S19	J	Translation, ribosomal structure and biogenesis	K02965|1|1e-44|142|cre:ChreCp013| small subunit ribosomal protein S19	GO:0006412//translation	GO:0003735//structural constituent of ribosome;GO:0019843//rRNA binding	GO:0015935//small ribosomal subunit;GO:0009507//chloroplast;GO:0005739//mitochondrion
6		AIR75633.1	ribosomal protein S3 (chloroplast) [Cyclotella sp. WC03_2]	24119	0.089	1	1	-	0.41	0.092	0.003843	1.1	AIR75633.1	MGQKTHPLGFRLGITQEHRSTWYTNFKHYPILLEEDDKIRTYLNKIAKLASISNIQINRNGLGDQIELNIETGRPGILVGDNGSNIKTLAANIKKIIPNNRQITINIVEVTNVNANASLIADLVVQQLEDRVAFRRAIREALQCAQDNQVNGIKIEVSGRLNGAEIARSEWIREGRVPLQTLRADIDYATKEANTIYGVLGVKVWLFKNEILKK	100	6e-155	gi|691190120|gb|AIR75633.1|	ribosomal protein S3 (chloroplast) [Cyclotella sp. WC03_2]	92.52	2e-145	sp|A0T0X9|RR3_THAPS	30S ribosomal protein S3, chloroplastic OS=Thalassiosira pseudonana GN=rps3 PE=3 SV=1	100	1e-153	tr|A0A089VNW1|A0A089VNW1_9STRA	30S ribosomal protein S3, chloroplastic OS=Cyclotella sp. WC03_2 GN=rps3 PE=3 SV=1	gi|427703075|ref|YP_007046297.1|	260	8e-87	COG0092	Ribosomal protein S3	J	Translation, ribosomal structure and biogenesis	K02982|1|2e-62|197|ppp:PhpapaCp067| small subunit ribosomal protein S3	GO:0006412//translation	GO:0003735//structural constituent of ribosome;GO:0019843//rRNA binding	GO:0015935//small ribosomal subunit;GO:0009507//chloroplast;GO:0005739//mitochondrion
7		EED89674.1	RL35, ribosomal protein 35 60S large ribosomal subunit [Thalassiosira pseudonana CCMP1335]	13782.9	0.083	1	2	XP_002293213.1;EJK70954.1	0.79	0.033	0.001552	-1.6	EED89674.1	MVKAYELRGLPKEELVKTLNELRKELSELHVAKVTGGAASKIAKIKSVRKSIARVLTVHNQQQKEGIRKASAGSKYISKDLRMKKTRAIRRALTKEQKGKKTLKQQKKDTHFPMRRYAVKA	100	2e-66	gi|224008508|ref|XP_002293213.1|	RL35, ribosomal protein 35 60S large ribosomal subunit [Thalassiosira pseudonana CCMP1335]	63.33	1e-35	sp|P17078|RL35_RAT	60S ribosomal protein L35 OS=Rattus norvegicus GN=Rpl35 PE=1 SV=3	100	4e-65	tr|B8CAG2|B8CAG2_THAPS	RL35, ribosomal protein 35 60S large ribosomal subunit OS=Thalassiosira pseudonana GN=RL35 PE=3 SV=1	gi|305662598|ref|YP_003858886.1|	53.5	5e-09	COG0255	Ribosomal protein L29	J	Translation, ribosomal structure and biogenesis	K02918|1|7e-37|125|gsl:Gasu_07620| large subunit ribosomal protein L35e	GO:0006412//translation	GO:0003735//structural constituent of ribosome	GO:0005840//ribosome
8		EED95523.1	RS4, ribosomal protein 4 [Thalassiosira pseudonana CCMP1335]	29529.5	0.08	1	3	XP_002288080.1	0.75	0.113	0.02808	0.2	EED95523.1	MARGPKKHLKRLNAPRHWNLGKMGGVWAPKPSAGPHKQRECLPVAIILRERLKYALTGKECQQICMERCVKIDGKVRTDHNYPAGFMDVVELEKSGDRFRLLYDTKGRFVLHRIQKDEAEYKLCRIQKGYMSAKKVPVAVTHDGRTLRFPDPDVAVNDTVKVNIATGKMSDIYKFEIGAMIMVTKGHNAGRVGTLEHVEKHDGSFSIVTIKDKKGNTFATRQANVFVIGSGDHPQVTLPKGRGIKKTILQERAEAEARGDL	100	0	gi|223996813|ref|XP_002288080.1|	RS4, ribosomal protein 4 [Thalassiosira pseudonana CCMP1335]	60.32	1e-118	sp|O62739|RS4Y1_MONDO	40S ribosomal protein S4, Y isoform 1 OS=Monodelphis domestica GN=RPS4Y1 PE=2 SV=3	100	0	tr|B8BVV7|B8BVV7_THAPS	40S ribosomal protein S4 OS=Thalassiosira pseudonana GN=RS4 PE=3 SV=1	gi|347524208|ref|YP_004781778.1|	171	6e-51	COG1471	Ribosomal protein S4E	J	Translation, ribosomal structure and biogenesis	K02987|1|9e-121|348|cre:CHLREDRAFT_188837| small subunit ribosomal protein S4e	GO:0006412//translation	GO:0003735//structural constituent of ribosome;GO:0003723//RNA binding	GO:0005840//ribosome;GO:0016020//membrane;GO:0009536//plastid;GO:0044446//intracellular organelle part
9		ADB27587.1	50S ribosomal protein L5 (chloroplast) [Thalassiosira oceanica CCMP1005]	27553.7	0.113	2	2	YP_004072634.1	0.73	0.145	0.04652	1.7	ADB27587.1	MRSQHSLEEIAELYGLLENIKKEYENGIHSVLRKSNPELFSNPHTIPKLKKISINRGLGLAAQNSNILKKSITEFTRITGQKPLITRAKKAVAGFKIRENMELGLSSTLRGEKMYNFLTKLIFFTFAQIRDFRGLSVRSFDKAGNYTFSLKEQLIFPEIEYDDVDQIQGLSVTLVVDSSTPKARSKTIDRVLNGMILLKFLRFPLNDCGYYDKYSSFGEINQVWDKKKHLRRKRWSQE	100	4e-176	gi|315320577|ref|YP_004072634.1|	50S ribosomal protein L5 [Thalassiosira oceanica CCMP1005]	94.96	4e-170	sp|A0T0Y5|RK5_THAPS	50S ribosomal protein L5, chloroplastic OS=Thalassiosira pseudonana GN=rpl5 PE=3 SV=1	100	1e-174	tr|E7BWN0|E7BWN0_THAOC	50S ribosomal protein L5, chloroplastic OS=Thalassiosira oceanica GN=rpl5 PE=3 SV=1	gi|17231695|ref|NP_488243.1|	181	5e-56	COG0094	Ribosomal protein L5	J	Translation, ribosomal structure and biogenesis	K02931|1|2e-41|143|smo:SELMODRAFT_6364| large subunit ribosomal protein L5	GO:0006412//translation	GO:0003735//structural constituent of ribosome;GO:0019843//rRNA binding	GO:0005840//ribosome;GO:0009507//chloroplast;GO:0005739//mitochondrion
10		YP_874599.1	50S ribosomal protein L6 (chloroplast) [Thalassiosira pseudonana]	20750.3	0.07	1	1	sp|A0T0Y7.1|RK6_THAPS;ABK20822.1	0.75	0.108	0.02704	1.5	YP_874599.1	MSRIGKLPIKLPTTVEISHQSDATVQVINVKGKFGSLQRTLPEELKIEQIHNDNGSSLIVSFENQTRTNKSLQGLYRTLINNMVIGVTEQFVIILTLQGVGYRASVQGKSLVLNLGYSHPVEIDIPEGITVEVTQNTTLNIKACDKEQLGLFAAKVRAWRPPEPYKGKGILYKNEQILRKAGKSGKK	100	7e-135	gi|118411205|ref|YP_874599.1|	50S ribosomal protein L6 [Thalassiosira pseudonana]	100	1e-135	sp|A0T0Y7|RK6_THAPS	50S ribosomal protein L6, chloroplastic OS=Thalassiosira pseudonana GN=rpl6 PE=3 SV=1	73.8	1e-95	tr|A0A089X999|A0A089X999_THAWE	50S ribosomal protein L6, chloroplastic OS=Thalassiosira weissflogii GN=rpl6 PE=3 SV=1	gi|428305857|ref|YP_007142682.1|	182	3e-57	COG0097	Ribosomal protein L6P/L9E	J	Translation, ribosomal structure and biogenesis	K02933|1|1e-56|182|sot:102601925| large subunit ribosomal protein L6	GO:0006412//translation	GO:0003735//structural constituent of ribosome;GO:0019843//rRNA binding	GO:0005840//ribosome;GO:0009507//chloroplast;GO:0005739//mitochondrion
11		AIR75501.1	ribosomal protein L18 (chloroplast) [Cyclotella sp. L04_2]	15497.6	0.074	1	2	AIR75642.1;YP_004072637.1;ADB27590.1	0.4	0.035	0.0002408	-1.6	AIR75501.1	MKFSKRVLLRLKNKNKKLKPDKYKKLKRESVRGLIKGTLERPRLSVFRSNENIYAQIIDDLTSKTLVSCSTLDRDIKLNSENGRTCNASRLMGEKLANLSKKKNITKIVFDRGPYLYHGRIKALADGARAGGLQF	100	3e-73	gi|691189987|gb|AIR75501.1|	ribosomal protein L18 (chloroplast) [Cyclotella sp. L04_2]	92.52	6e-68	sp|A0T0Y8|RK18_THAPS	50S ribosomal protein L18, chloroplastic OS=Thalassiosira pseudonana GN=rpl18 PE=3 SV=1	100	8e-72	tr|A0A089VGW9|A0A089VGW9_9STRA	50S ribosomal protein L18, chloroplastic OS=Cyclotella sp. L04_2 GN=rpl18 PE=3 SV=1	gi|430748630|ref|YP_007211538.1|	128	2e-37	COG0256	Ribosomal protein L18	J	Translation, ribosomal structure and biogenesis	K02881|1|4e-34|119|vcn:VOLCADRAFT_103908| large subunit ribosomal protein L18	GO:0006412//translation	GO:0003735//structural constituent of ribosome;GO:0019843//rRNA binding	GO:0005840//ribosome;GO:0009507//chloroplast
12		EED95018.1	RL17A, ribosomal protein 27A 60S large ribosomal subunit [Thalassiosira pseudonana CCMP1335]	16118.7	0.061	1	4	XP_002287575.1	0.67	0.059	0.002927	-0.4	EED95018.1	MPTRLHKGRKKRGHVQMGHGRIGKHRKHPGGRGNAGGQHHHRILFDKYHPGYFGKVGMRQFHQLKNRSFTPTLNIDKLFNVAGEGVYEAAKSASDGKAPVIDLVSKGYFKLLGNGQITVPVIVKAKFFSKLAEQKIKAAGGACLLAA	100	1e-103	gi|223995803|ref|XP_002287575.1|	RL17A, ribosomal protein 27A 60S large ribosomal subunit [Thalassiosira pseudonana CCMP1335]	64.86	1e-64	sp|P18445|RL27A_RAT	60S ribosomal protein L27a OS=Rattus norvegicus GN=Rpl27a PE=1 SV=3	100	3e-102	tr|B8BVY6|B8BVY6_THAPS	RL17A, ribosomal protein 27A 60S large ribosomal subunit OS=Thalassiosira pseudonana GN=RL27A PE=3 SV=1	gi|557693917|ref|YP_008796971.1|	79.3	6e-18	COG0200	Ribosomal protein L15	J	Translation, ribosomal structure and biogenesis	K02900|1|2e-66|201|olu:OSTLU_27402| large subunit ribosomal protein L27Ae	GO:0006412//translation	GO:0003735//structural constituent of ribosome	GO:0005840//ribosome
13		YP_009093249.1	ribosomal protein S11 (chloroplast) [Roundia cardiophora]	13802.4	0.185	2	7	AIR75506.1;AIR75647.1;AIR75922.1	0.66	0.059	0.002382	-0.3	YP_009093249.1	MAQKIRKSTVKKNRSNLGTGVVHIQSTFNNTIVTITNITGDTISWASSGSSGFKGARKGTPFAAQTAAEKAALEALSTGIKTVEILVKGQGSGRETAIRSIEGAGLEILSIQDITPVPHNGCRPRKRRRV	98.46	8e-62	gi|700082724|ref|YP_009093522.1|	ribosomal protein S11 (chloroplast) [Thalassiosira weissflogii]	94.62	3e-59	sp|A0T0Z3|RR11_THAPS	30S ribosomal protein S11, chloroplastic OS=Thalassiosira pseudonana GN=rps11 PE=3 SV=1	98.46	2e-60	tr|A0A089VPD1|A0A089VPD1_THAWE	30S ribosomal protein S11, chloroplastic OS=Thalassiosira weissflogii GN=rps11 PE=3 SV=1	gi|428777703|ref|YP_007169490.1|	182	7e-59	COG0100	Ribosomal protein S11	J	Translation, ribosomal structure and biogenesis	K02948|1|4e-28|103|ppp:PhpapaCp061| small subunit ribosomal protein S11		GO:0003723//RNA binding	GO:0030529//ribonucleoprotein complex;GO:0009536//plastid
14		YP_004072616.1	30S ribosomal protein S4 (chloroplast) [Thalassiosira oceanica CCMP1005]	23559.8	0.063	1	2	ADB27569.1	0.47	0.03	0.0001672	-1.5	YP_004072616.1	MSRYRGPKLRITRRLGKLPGLTQKTSKKTARPGQHGKTLGDGKKKTTEYGLRLEEKQKLKFNYGITESQLYHYIKEARRRKGVTGLILLQLLEMRLDTICFSLGFAPTIAAARQIVNHGHITVNNKVVDIPSFQCQINDVIGVKAKSTSKNIIENNIKTINFIEPPTHLILDKSKLEGTVKNYCDRNELLLDLNELLVIEYYSRR	100	3e-112	gi|315320559|ref|YP_004072616.1|	30S ribosomal protein S4 [Thalassiosira oceanica CCMP1005]	84.88	2e-99	sp|A0T0W7|RR4_THAPS	30S ribosomal protein S4, chloroplastic OS=Thalassiosira pseudonana GN=rps4 PE=3 SV=1	100	8e-111	tr|E7BWL2|E7BWL2_THAOC	30S ribosomal protein S4, chloroplastic OS=Thalassiosira oceanica GN=rps4 PE=3 SV=1	gi|434391547|ref|YP_007126494.1|	248	6e-83	COG0522	Ribosomal protein S4 or related protein	J	Translation, ribosomal structure and biogenesis	K02986|1|3e-57|182|ppp:PhpapaCp037| small subunit ribosomal protein S4	GO:0006412//translation	GO:0003735//structural constituent of ribosome;GO:0019843//rRNA binding	GO:0015935//small ribosomal subunit;GO:0009507//chloroplast
15		YP_004072644.1	50S ribosomal protein L13 (chloroplast) [Thalassiosira oceanica CCMP1005]	15949.6	0.101	1	1	ADB27597.1	0.6	0.086	0.005269	-0.5	YP_004072644.1	MNKTFIPSTNYNKRKWYVIDCKDKQLGRLASSIVPLLTGKTKSIYHPSLDVGDYVILINSEELKIDRDVERFHVYEPGRPGSSLKRLVNILPKRIIENCVFNMLPNGFPKKHLVKRLKVYQGAVHPHAAQDPKVLEII	100	1e-98	gi|315320587|ref|YP_004072644.1|	50S ribosomal protein L13 [Thalassiosira oceanica CCMP1005]	51.47	8e-48	sp|P49551|RK13_ODOSI	50S ribosomal protein L13, chloroplastic OS=Odontella sinensis GN=rpl13 PE=3 SV=1	100	3e-97	tr|E7BWP0|E7BWP0_THAOC	50S ribosomal protein L13, chloroplastic OS=Thalassiosira oceanica GN=rpl13 PE=3 SV=1	gi|428305844|ref|YP_007142669.1|	130	4e-38	COG0102	Ribosomal protein L13	J	Translation, ribosomal structure and biogenesis	K02871|1|8e-30|109|ppp:PHYPADRAFT_47260| large subunit ribosomal protein L13	GO:0006412//translation	GO:0003735//structural constituent of ribosome	GO:0005840//ribosome;GO:0009507//chloroplast
16		ABK20830.1	50S ribosomal protein L13 (chloroplast) [Thalassiosira pseudonana]	15722.5	0.088	1	1	YP_874607.1;AIR76197.1;YP_009093524.1	0.62	0.134	0.01908	0.4	ABK20830.1	MNKTFIPASNYNKRKWYVIDCKDRQLGRLASTIVPLLTGKSKPIYHPSVDVGDYVILINTEYLKLDREIERFHVFEPGRPGSSLKRLVNVAPKRIIESCVFNMLPNGFPKKHLVKRLKVYQGTEHPHVAQAPQVIL	100	8e-98	gi|118411213|ref|YP_874607.1|	50S ribosomal protein L13 [Thalassiosira pseudonana]	52.27	3e-47	sp|P49551|RK13_ODOSI	50S ribosomal protein L13, chloroplastic OS=Odontella sinensis GN=rpl13 PE=3 SV=1	100	2e-96	tr|A0T0Z5|A0T0Z5_THAPS	50S ribosomal protein L13, chloroplastic OS=Thalassiosira pseudonana GN=rpl13 PE=3 SV=1	gi|428305844|ref|YP_007142669.1|	124	1e-35	COG0102	Ribosomal protein L13	J	Translation, ribosomal structure and biogenesis	K02871|1|9e-30|108|ppp:PHYPADRAFT_35792| large subunit ribosomal protein L13	GO:0006412//translation	GO:0003735//structural constituent of ribosome	GO:0005840//ribosome;GO:0009507//chloroplast
17		ADB27601.1	30S ribosomal protein S7 (chloroplast) [Thalassiosira oceanica CCMP1005]	17630.5	0.058	1	1	YP_009093255.1;AIR75512.1;YP_004072648.1;ABK20834.1;AIR76201.1;AIR75653.1;YP_009093528.1;AIR75928.1;YP_874611.1;sp|A0T0Z9.1|RR7_THAPS	0.72	0.137	0.03651	1.3	ADB27601.1	MSRRNISKKRFPKADPTYNSYLVSLLVTRILKSGKKNLAQNIVNGAFEIIKSKTNEDPLVIFEKAIRNASPVVEVKARRIGGSTYQVPIEVSSFRATNLALRWIIQYSKQRVGRTMSSKLASEIIDTANDIGNTIKKKEETHKMADANKAFAHFRY	100	9e-112	gi|315320591|ref|YP_004072648.1|	30S ribosomal protein S7 [Thalassiosira oceanica CCMP1005]	97.44	2e-109	sp|A0T0Z9|RR7_THAPS	30S ribosomal protein S7, chloroplastic OS=Thalassiosira pseudonana GN=rps7 PE=3 SV=1	100	2e-110	tr|E7BWP4|E7BWP4_THAOC	30S ribosomal protein S7, chloroplastic OS=Thalassiosira oceanica GN=rps7 PE=3 SV=1	gi|428226258|ref|YP_007110355.1|	209	7e-69	COG0049	Ribosomal protein S7	J	Translation, ribosomal structure and biogenesis	K02992|1|4e-63|194|gsl:JL72_p160| small subunit ribosomal protein S7	GO:0006412//translation	GO:0003735//structural constituent of ribosome;GO:0019843//rRNA binding	GO:0015935//small ribosomal subunit;GO:0009507//chloroplast;GO:0005739//mitochondrion
18		XP_002293898.1	RS5, ribosomal protein 5 [Thalassiosira pseudonana CCMP1335]	24648.7	0.133	1	4	EED88907.1	0.8	0.076	0.01652	-1.3	XP_002293898.1	MADVEDPIEEPVEVEEEEEEEFVAVGGATEVKLFGKWSFDDIEIRDISLVDYIACKGDHATYLPHTAGRYQKKRFRKASCPIVERLACCLMRKGRNSGKKLMAVRIVQHTLEIIHLLTDQNPVQVVVDAIINSGPREDSTRVGGAGVVRRQAVDMSPFRRVNYALYLLATGAREASFRNLKTVAECLAEELVNAARGSSNSYAIKKKDEIERVSKSNR	100	5e-128	gi|224009880|ref|XP_002293898.1|	RS5, ribosomal protein 5 [Thalassiosira pseudonana CCMP1335]	73.94	5e-99	sp|O65731|RS5_CICAR	40S ribosomal protein S5 (Fragment) OS=Cicer arietinum GN=RPS5 PE=2 SV=1	100	1e-126	tr|B8CC69|B8CC69_THAPS	RS5, ribosomal protein 5 OS=Thalassiosira pseudonana GN=RS5 PE=3 SV=1	gi|124028426|ref|YP_001013746.1|	204	4e-65	COG0049	Ribosomal protein S7	J	Translation, ribosomal structure and biogenesis	K02989|1|8e-103|298|vcn:VOLCADRAFT_120316| small subunit ribosomal protein S5e	GO:0006412//translation	GO:0003735//structural constituent of ribosome;GO:0003723//RNA binding	GO:0022626//cytosolic ribosome;GO:0005773//vacuole;GO:0005886//plasma membrane;GO:0005618//cell wall;GO:0015935//small ribosomal subunit;GO:0009507//chloroplast
19		EJK46643.1	hypothetical protein THAOC_34681 [Thalassiosira oceanica]	28736	0.105	1	2	-	0.46	0.046	0.0005591	1.1	EJK46643.1	MAKKSSKSSKAKAPAKAPSKADPLFPSKPRSFGVGGDVRPSGRDLSRFVRWPKYVRIQRQRAVLYQRLKVPPSINQFTKAIGKNEAASVFTLLNKYRPETPAQKKQRLKETAAGKAKAAGVPHQLKFGLKHVTTLVEEKKASLVLIACDVNPIELVLWLPALCRKMEVPFLIVKDKARLGTLVHQKTSAVVALTGVNKEDEKQLQIFRDLGIEKFNDNTDLMRKWGGGIMGLKTQAKLDKRAKALAVEEAKKQASLKR	100	7e-165	gi|397569278|gb|EJK46643.1|	hypothetical protein THAOC_34681 [Thalassiosira oceanica]	54.89	3e-82	sp|P0DJ14|RL7A_TETTH	60S ribosomal protein L7a OS=Tetrahymena thermophila GN=RPL7A PE=1 SV=1	100	2e-163	tr|K0R247|K0R247_THAOC	Uncharacterized protein OS=Thalassiosira oceanica GN=THAOC_34681 PE=4 SV=1	gi|13541280|ref|NP_110968.1|	63.2	5e-11	COG1358	Ribosomal protein L7Ae or related RNA K-turn-binding protein	J	Translation, ribosomal structure and biogenesis	K02936|1|9e-83|252|ccp:CHC_T00010252001| large subunit ribosomal protein L7Ae			GO:0030529//ribonucleoprotein complex
20		AIR75420.1	ribosomal protein L12 (chloroplast) [Cyclotella sp. L04_2]	13482.2	0.141	1	5	AIR75561.1	0.42	0.155	0.01683	-0.3	AIR75420.1	MSEKITQIVEELKTLTLLEASELVAAIEETFGVDASASVGGNIVMAAAPAAVEEVEEKTEFNVMLDEVPADKKIAVLKVVRTLTGLGLKEAKELVESTPKVIQEALGKEAAEDAKKQIEDAGGKVSLT	100	1e-71	gi|691189906|gb|AIR75420.1|	ribosomal protein L12 (chloroplast) [Cyclotella sp. L04_2]	91.41	3e-64	sp|A0T0Q7|RK12_THAPS	50S ribosomal protein L12, chloroplastic OS=Thalassiosira pseudonana GN=rpl12 PE=3 SV=1	100	3e-70	tr|A0A089VM10|A0A089VM10_9STRA	50S ribosomal protein L12, chloroplastic OS=Cyclotella sp. L04_2 GN=rpl12 PE=3 SV=1	gi|428307481|ref|YP_007144306.1|	161	1e-50	COG0222	Ribosomal protein L7/L12	J	Translation, ribosomal structure and biogenesis	K02863|1|1e-29|114|gsl:Gasu_40200| large subunit ribosomal protein L1!K02935|2|5e-27|102|sly:101253247| large subunit ribosomal protein L7/L12	GO:0006412//translation	GO:0003735//structural constituent of ribosome	GO:0005840//ribosome;GO:0009507//chloroplast
21		YP_009093163.1	ribosomal protein L12 (chloroplast) [Roundia cardiophora]	13460.1	0.133	1	13	AIR75836.1	0.48	0.115	0.008483	-1.2	YP_009093163.1	MSEKINQIVEELKTLTLLEASELVTAIEETFGVDASASVGGSIVMGAAPAAAEEVEEKTEFNVMLDEVPADKKIAVLKVVRTLTGLGLKEAKELVESAPKMVQEALSKDAAEDAKKQIEDAGGKVSLT	100	1e-70	gi|700658158|ref|YP_009093163.1|	ribosomal protein L12 (chloroplast) [Roundia cardiophora]	92.19	4e-62	sp|A0T0Q7|RK12_THAPS	50S ribosomal protein L12, chloroplastic OS=Thalassiosira pseudonana GN=rpl12 PE=3 SV=1	100	3e-69	tr|A0A089VHS3|A0A089VHS3_9STRA	50S ribosomal protein L12, chloroplastic OS=Roundia cardiophora GN=rpl12 PE=3 SV=1	gi|428307481|ref|YP_007144306.1|	164	1e-51	COG0222	Ribosomal protein L7/L12	J	Translation, ribosomal structure and biogenesis	K02863|1|9e-27|106|gsl:Gasu_40200| large subunit ribosomal protein L1!K02935|2|5e-26|99.8|sly:101253247| large subunit ribosomal protein L7/L12	GO:0006412//translation	GO:0003735//structural constituent of ribosome	GO:0005840//ribosome;GO:0009507//chloroplast
22		EJK60198.1	hypothetical protein THAOC_19503 [Thalassiosira oceanica]	81549	0.011	1	4	-	0.71	0.117	0.02256	0.7	EJK60198.1	MQSASSRIRPCPPPSSTLCHYHSTPSVRQDDVTQAKAASPKVEDLFQRIIFLDLVEVHLLAELINEKLGITVSDAERARMAKGGGGGAENKTEEDEEAAAPAEEKTAFDVKLTAFDAKSKIKVIKEIRAITGLGLKESKELVEGVPSTVKKDIKQEEADELKAKLEGLGATIEIIQCEELNLVRQFPTTHTHADEIKNMRVLDRLSAAVYLAFRPDRPAWQKHLLQLVARRLLEALQQPLPHGSQQRRLEVEVELARDGLDEEGPVADGKVRGGHEGVVAGRQFGLEVGVAVYPLGRWPGGGGQQLEDVVGHLVRARAVHPPPKVAEHVDLHLRDLLDRMHSARQSAHGLRVHQVGLANLRRDVESSYRAELELPPTPHDLPSSAGAGAEETVEEAHCL…	100	0	gi|397609052|gb|EJK60198.1|	hypothetical protein THAOC_19503 [Thalassiosira oceanica]	61.43	2e-18	sp|Q60A07|RL7_METCA	50S ribosomal protein L7/L12 OS=Methylococcus capsulatus (strain ATCC 33009 / NCIMB 11132 / Bath) GN=rplL PE=3 SV=1	100	0	tr|K0S2E6|K0S2E6_THAOC	Uncharacterized protein OS=Thalassiosira oceanica GN=THAOC_19503 PE=3 SV=1	gi|408420936|ref|YP_006762350.1|	90.5	1e-19	COG0222	Ribosomal protein L7/L12	J	Translation, ribosomal structure and biogenesis	K02935|1|5e-24|103|apro:F751_3749| large subunit ribosomal protein L7/L12	GO:0006412//translation	GO:0003735//structural constituent of ribosome	GO:0005840//ribosome
23		AIR75420.1	ribosomal protein L12 (chloroplast) [Cyclotella sp. L04_2]	13482.2	0.141	1	5	AIR75561.1	0.42	0.155	0.01683	0.3	AIR75420.1	MSEKITQIVEELKTLTLLEASELVAAIEETFGVDASASVGGNIVMAAAPAAVEEVEEKTEFNVMLDEVPADKKIAVLKVVRTLTGLGLKEAKELVESTPKVIQEALGKEAAEDAKKQIEDAGGKVSLT	100	1e-71	gi|691189906|gb|AIR75420.1|	ribosomal protein L12 (chloroplast) [Cyclotella sp. L04_2]	91.41	3e-64	sp|A0T0Q7|RK12_THAPS	50S ribosomal protein L12, chloroplastic OS=Thalassiosira pseudonana GN=rpl12 PE=3 SV=1	100	3e-70	tr|A0A089VM10|A0A089VM10_9STRA	50S ribosomal protein L12, chloroplastic OS=Cyclotella sp. L04_2 GN=rpl12 PE=3 SV=1	gi|428307481|ref|YP_007144306.1|	161	1e-50	COG0222	Ribosomal protein L7/L12	J	Translation, ribosomal structure and biogenesis	K02863|1|1e-29|114|gsl:Gasu_40200| large subunit ribosomal protein L1!K02935|2|5e-27|102|sly:101253247| large subunit ribosomal protein L7/L12	GO:0006412//translation	GO:0003735//structural constituent of ribosome	GO:0005840//ribosome;GO:0009507//chloroplast
24		YP_009093163.1	ribosomal protein L12 (chloroplast) [Roundia cardiophora]	13460.1	0.133	1	13	AIR75836.1	0.48	0.115	0.008483	0.8	YP_009093163.1	MSEKINQIVEELKTLTLLEASELVTAIEETFGVDASASVGGSIVMGAAPAAAEEVEEKTEFNVMLDEVPADKKIAVLKVVRTLTGLGLKEAKELVESAPKMVQEALSKDAAEDAKKQIEDAGGKVSLT	100	1e-70	gi|700658158|ref|YP_009093163.1|	ribosomal protein L12 (chloroplast) [Roundia cardiophora]	92.19	4e-62	sp|A0T0Q7|RK12_THAPS	50S ribosomal protein L12, chloroplastic OS=Thalassiosira pseudonana GN=rpl12 PE=3 SV=1	100	3e-69	tr|A0A089VHS3|A0A089VHS3_9STRA	50S ribosomal protein L12, chloroplastic OS=Roundia cardiophora GN=rpl12 PE=3 SV=1	gi|428307481|ref|YP_007144306.1|	164	1e-51	COG0222	Ribosomal protein L7/L12	J	Translation, ribosomal structure and biogenesis	K02863|1|9e-27|106|gsl:Gasu_40200| large subunit ribosomal protein L1!K02935|2|5e-26|99.8|sly:101253247| large subunit ribosomal protein L7/L12	GO:0006412//translation	GO:0003735//structural constituent of ribosome	GO:0005840//ribosome;GO:0009507//chloroplast
25		AIR76108.1	ribosomal protein L1 (chloroplast) [Thalassiosira weissflogii]	25287.2	0.117	2	6	YP_009093435.1	0.57	0.082	0.004605	-1.2	AIR76108.1	MRKLSRRQNENLKKTKNVVHSSLEEAINLLQETATAKFIESVELHANLNIDPKYADQQLRTTVTLPHGVGKSVRIAVLTNEANFNEATEAGADIVGSQDLIDDISQGNINFDLLIATPDMMPKLAKLGRVLGPKGLMPSPKSGTVSTTLTETLSDFKKGKFEYKADKTGIVHVSFGKANFSKSQLMENLSSLYKSIEQNRPSGVKGKYFKSLFICSSMGPSIQLDLNVFD	100	6e-170	gi|700082637|ref|YP_009093435.1|	ribosomal protein L1 (chloroplast) [Thalassiosira weissflogii]	91.74	6e-159	sp|A0T0Q6|RK1_THAPS	50S ribosomal protein L1, chloroplastic OS=Thalassiosira pseudonana GN=rpl1 PE=3 SV=1	100	1e-168	tr|A0A089VQC3|A0A089VQC3_THAWE	50S ribosomal protein L1, chloroplastic OS=Thalassiosira weissflogii GN=rpl1 PE=3 SV=1	gi|428768608|ref|YP_007160398.1|	293	9e-100	COG0081	Ribosomal protein L1	J	Translation, ribosomal structure and biogenesis	K02863|1|3e-90|273|nnu:104606334| large subunit ribosomal protein L1	GO:0006412//translation	GO:0003735//structural constituent of ribosome;GO:0019843//rRNA binding	GO:0015934//large ribosomal subunit;GO:0009507//chloroplast
1		sp|A0T0N1.1|RK19_THAPS	RecName: Full=50S ribosomal protein L19, chloroplastic	13784.8	0.242	1	1	EED86161.1;ABK20716.1;YP_874493.1;XP_002297521.1	0.48	0.194	0.0297	-0.2	sp|A0T0N1.1|RK19_THAPS	MLNLDNQKAIDNLHQSFIKSDLPKIQIGDTLKLGIKIIEGNKERVQFYEGTVIAKKNSSINTTITVRKVLQGIGIERIFLIHSPKVASIEVIRHAKVRRSKLYYLRNLRGKASRLKQRFE	100	1e-81	gi|118411099|ref|YP_874493.1|	50S ribosomal protein L19 [Thalassiosira pseudonana]	100	2e-82	sp|A0T0N1|RK19_THAPS	50S ribosomal protein L19, chloroplastic OS=Thalassiosira pseudonana GN=rpl19 PE=3 SV=1	100	2e-80	tr|B8LES2|B8LES2_THAPS	RK19, ribosomal protein 19 50S large ribosomal subunit, chloroplast, translation, protein biosynthesis OS=Thalassiosira pseudonana GN=RK19 PE=3 SV=1	gi|16330014|ref|NP_440742.1|	162	3e-51	COG0335	Ribosomal protein L19	J	Translation, ribosomal structure and biogenesis	K02884|1|1e-21|86.3|mdm:103432807| large subunit ribosomal protein L19	GO:0006412//translation	GO:0003735//structural constituent of ribosome	GO:0005840//ribosome;GO:0009507//chloroplast
2	Small subunit	XP_002292331.1	RS1, ribosomal protein 1, partial [Thalassiosira pseudonana CCMP1335]	31903.2	0.199	6	15	EED90306.1	0.75	0.071	0.008362	-0.5	XP_002292331.1	VGFSYASFADAVAATDYAFNRNDIVKGTVVQYDKGGCIVDIGAKASAYLPLQEATLFQEQGQSIEGIIDIDEERQFEIISEEDENGQLLVSIRRIQYREAWDKVIAKQDSDEVFEAECVSVNRGGAIFLVEGLRAFLPGSHLTGRLPDDDLVGQTLPLKFLEVNQEDNKLVVSNRRAVVEEQMAELSRGDVIDGIVKALKPYGAFVEVGGMSGLLHISQISMDRITDLEQVLQPGQKIKCMIIDHDKVNGRIALSTKTLEPEPGDMIKDPARVYEMADETARVYLEK	100	0	gi|224006742|ref|XP_002292331.1|	RS1, ribosomal protein 1 [Thalassiosira pseudonana CCMP1335]	49.13	7e-92	sp|P46228|RS1_SYNP6	30S ribosomal protein S1 OS=Synechococcus sp. (strain ATCC 27144 / PCC 6301 / SAUG 1402/1) GN=rpsA PE=1 SV=4	100	0	tr|B8C8K9|B8C8K9_THAPS	RS1, ribosomal protein 1 (Fragment) OS=Thalassiosira pseudonana GN=RS1 PE=4 SV=1	gi|428224572|ref|YP_007108669.1|	285	3e-94	COG0539	Ribosomal protein S1	J	Translation, ribosomal structure and biogenesis	K02945|1|2e-84|261|mis:MICPUN_95520| small subunit ribosomal protein S1	GO:0006412//translation	GO:0003735//structural constituent of ribosome;GO:0003723//RNA binding	GO:0005840//ribosome;GO:0009536//plastid
3		EJK76287.1	hypothetical protein THAOC_01961 [Thalassiosira oceanica]	22771.4	0.092	1	5	-	0.72	0.145	0.04107	0.2	EJK76287.1	MVKHNNVIPNIHCHKKYLESSRGPLKVKLSLNQAGKKKSRRLARAARAAAIAPRPLKLLRPAVHCQTQRYSAKVRLGKGFTLEELKAAGLTAKYARTIGIAVDHRRTNKSAESLAANVARLNEYKSKVIVFPKKRMSATKSGDSSAEECKAASQYSGTVLPLVKPAKEIVLEDVPEQEVSAFTQMRLAAKETRVAGHRASVANRKE	100	6e-123	gi|397644187|gb|EJK76287.1|	hypothetical protein THAOC_01961 [Thalassiosira oceanica]	47.06	8e-40	sp|P41128|RL131_BRANA	60S ribosomal protein L13-1 OS=Brassica napus PE=2 SV=1	100	2e-121	tr|K0TQM1|K0TQM1_THAOC	60S ribosomal protein L13 OS=Thalassiosira oceanica GN=THAOC_01961 PE=3 SV=1	-	-	-	-	-	-	-	K02873|1|6e-41|141|ppp:PHYPADRAFT_227920| large subunit ribosomal protein L13e			GO:0030529//ribonucleoprotein complex
4		EJK60029.1	hypothetical protein THAOC_19689 [Thalassiosira oceanica]	126479	0.048	2	2	-	0.53	0.103	0.007123	0.5	EJK60029.1	MCLSAAVMGSRGSLSYLRYQTTERDFYVSAPLLTHFNIHSGKNKRLTKSKKGSKKKAVDPFLKKDWYKLIAPSIFSQKECGKTIITRTQGQKIASEGLKGRVIELSLGDLNQNEASSYRKIKLCVEDVQGFNCLLNFHGMDMTRDKLCSLIKKKQSIIEANVDARTTDGYIVRMFCIAFTKKQDDQLKETCYAKSAKERSIRAKMVSTMATLAGKGDLKTLVKALVAGTTGDEIVREASSIFPIKDCYIRKVKVIKKPKFDVTALMEWHNDDGQDVGQNVAPAVAEETVAGSGGRLSRVQTAHEDENGVKGQAEDLTYSTMFGDPSSPLTWEILSRLAGASTSSSGEARPFYVQRAGPGGEEPRVDEDEQFFFADPLGSASAASLSVCSRDTASERLLR…	100	0	gi|397608572|gb|EJK60029.1|	hypothetical protein THAOC_19689 [Thalassiosira oceanica]	57.26	9e-81	sp|Q285L8|RS3A_TOBAC	40S ribosomal protein S3a OS=Nicotiana tabacum GN=cyc07 PE=2 SV=1	100	0	tr|K0S574|K0S574_THAOC	40S ribosomal protein S3a OS=Thalassiosira oceanica GN=THAOC_19689 PE=3 SV=1	gi|330509087|ref|YP_004385515.1|	102	1e-22	COG1890	Ribosomal protein S3AE	J	Translation, ribosomal structure and biogenesis	K02984|1|2e-81|270|sly:101260518| small subunit ribosomal protein S3Ae	GO:0006412//translation	GO:0003735//structural constituent of ribosome	GO:0005840//ribosome
5		EED91184.1	RS24, ribosomal protein 24 40S small ribosomal subunit [Thalassiosira pseudonana CCMP1335]	15339.3	0.168	2	11	XP_002291077.1	0.8	0.056	0.008166	-1.1	EED91184.1	MSDQSVVVKTRKFMKNPLLARRQMIVDIIHPGRANVAKSELQEVVGGMHKTDSKLVVLFGFRTKFGGGKSTGFCVIYDNEDALRKFEPKHRLVRLGLEDKKDRSRKAMKEAKNKGKKTRGTGASVAKHKAKRAANSD	100	3e-86	gi|224002811|ref|XP_002291077.1|	RS24, ribosomal protein 24 40S small ribosomal subunit [Thalassiosira pseudonana CCMP1335]	59.18	3e-40	sp|P14249|RS24_MUCCL	40S ribosomal protein S24 OS=Mucor circinelloides f. lusitanicus GN=RPS24 PE=3 SV=1	100	7e-85	tr|B8C5V1|B8C5V1_THAPS	RS24, ribosomal protein 24 40S small ribosomal subunit OS=Thalassiosira pseudonana GN=RS24 PE=3 SV=1	gi|289596242|ref|YP_003482938.1|	56.6	8e-10	COG2004	Ribosomal protein S24E	J	Translation, ribosomal structure and biogenesis	K02974|1|2e-43|142|olu:OSTLU_42986| small subunit ribosomal protein S24e	GO:0006412//translation	GO:0003735//structural constituent of ribosome;GO:0000166//nucleotide binding	GO:0005840//ribosome
6		XP_002290143.1	predicted protein [Thalassiosira pseudonana CCMP1335]	17651.5	0.17	3	29	EED91895.1	0.77	0.094	0.02283	0.7	XP_002290143.1	MQIFVKTLTGKTITLDVEPSDTIDNVKTKIQDKEGIPPDQQRLIFAGKQLEDGRTLSDYNIQKESTLHLVLRLRGGGKKRKKKVYTKPKKAKRVNKTIPLQTLKYYRVEDGGKVVRLRKYSPVAGIGCFMAQHHDRYYCGKSGTTFLYEDMKE	100	2e-86	gi|224000942|ref|XP_002290143.1|	predicted protein [Thalassiosira pseudonana CCMP1335]	77.4	4e-58	sp|P69061|RS27A_KLULA	Ubiquitin-40S ribosomal protein S27a OS=Kluyveromyces lactis (strain ATCC 8585 / CBS 2359 / DSM 70799 / NBRC 1267 / NRRL Y-1140 / WM37) GN=ubi3 PE=1 SV=2	100	5e-85	tr|B8C272|B8C272_THAPS	Uncharacterized protein OS=Thalassiosira pseudonana GN=THAPSDRAFT_40669 PE=4 SV=1	gi|317134055|ref|YP_004089966.1|	136	4e-39	COG5272	Ubiquitin	O	Posttranslational modification, protein turnover, chaperones	K02977|1|1e-58|182|lja:Lj2g3v1415010.1| small subunit ribosomal protein S27Ae	GO:0006412//translation	GO:0003735//structural constituent of ribosome	GO:0005840//ribosome
